# Supplementary material for: Distinct catecholaminergic pathways projecting to hippocampal CA1 transmit contrasting signals during navigation in familiar and novel environments
Source: eLife. 2024 Nov 6;13:RP95213. doi: 10.7554/eLife.95213 (PMC11540301; doi:10.7554/eLife.95213)
Supplement: Figure 1—figure supplement 1—source data 1. [file elife-95213-fig1-figsupp1-data1.xlsx]

## Sheet: supp 1.a.i.
Supp 1a.i	time to reward
	VTA axons										LC axons
time from reward	roi 1	roi 2	roi 3	roi 4	roi 5	roi 6	roi 7	roi 8	roi 9		roi 1	roi 2	roi 3	roi 4	roi 5	roi 6	roi 7	roi 8	roi 9	roi 10	roi 11	roi 12	roi 13	roi 14	roi 15	roi 16	roi 17	roi 18	roi 19	roi 20	roi 21	roi 22	roi 23	roi 24	roi 25	roi 26	roi 27	roi 28	roi 29	roi 30	roi 31	roi 32	roi 33	roi 34	roi 35	roi 36	roi 37	roi 38	roi 39
-96.8054	NaN	NaN	NaN	NaN	NaN	NaN	NaN	NaN	NaN		NaN	NaN	NaN	NaN	NaN	NaN	NaN	NaN	NaN	NaN	NaN	NaN	NaN	NaN	NaN	NaN	NaN	NaN	NaN	NaN	NaN	NaN	NaN	NaN	NaN	NaN	NaN	NaN	NaN	NaN	NaN	NaN	NaN	NaN	NaN	NaN	NaN	NaN	NaN
-96.7086	NaN	NaN	NaN	NaN	NaN	NaN	NaN	NaN	NaN		NaN	NaN	NaN	NaN	NaN	NaN	NaN	NaN	NaN	NaN	NaN	NaN	NaN	NaN	NaN	NaN	NaN	NaN	NaN	NaN	NaN	NaN	NaN	NaN	NaN	NaN	NaN	NaN	NaN	NaN	NaN	NaN	NaN	NaN	NaN	NaN	NaN	NaN	NaN
-96.6118	NaN	NaN	NaN	NaN	NaN	NaN	NaN	NaN	NaN		NaN	NaN	NaN	NaN	NaN	NaN	NaN	NaN	NaN	NaN	NaN	NaN	NaN	NaN	NaN	NaN	NaN	NaN	NaN	NaN	NaN	NaN	NaN	NaN	NaN	NaN	NaN	NaN	NaN	NaN	NaN	NaN	NaN	NaN	NaN	NaN	NaN	NaN	NaN
-96.515	NaN	NaN	NaN	NaN	NaN	NaN	NaN	NaN	NaN		NaN	NaN	NaN	NaN	NaN	NaN	NaN	NaN	NaN	NaN	NaN	NaN	NaN	NaN	NaN	NaN	NaN	NaN	NaN	NaN	NaN	NaN	NaN	NaN	NaN	NaN	NaN	NaN	NaN	NaN	NaN	NaN	NaN	NaN	NaN	NaN	NaN	NaN	NaN
-96.4182	NaN	NaN	NaN	NaN	NaN	NaN	NaN	NaN	NaN		NaN	NaN	NaN	NaN	NaN	NaN	NaN	NaN	NaN	NaN	NaN	NaN	NaN	NaN	NaN	NaN	NaN	NaN	NaN	NaN	NaN	NaN	NaN	NaN	NaN	NaN	NaN	NaN	NaN	NaN	NaN	NaN	NaN	NaN	NaN	NaN	NaN	NaN	NaN
-96.3214	NaN	NaN	NaN	NaN	NaN	NaN	NaN	NaN	NaN		NaN	NaN	NaN	NaN	NaN	NaN	NaN	NaN	NaN	NaN	NaN	NaN	NaN	NaN	NaN	NaN	NaN	NaN	NaN	NaN	NaN	NaN	NaN	NaN	NaN	NaN	NaN	NaN	NaN	NaN	NaN	NaN	NaN	NaN	NaN	NaN	NaN	NaN	NaN
-96.2246	NaN	NaN	NaN	NaN	NaN	NaN	NaN	NaN	NaN		NaN	NaN	NaN	NaN	NaN	NaN	NaN	NaN	NaN	NaN	NaN	NaN	NaN	NaN	NaN	NaN	NaN	NaN	NaN	NaN	NaN	NaN	NaN	NaN	NaN	NaN	NaN	NaN	NaN	NaN	NaN	NaN	NaN	NaN	NaN	NaN	NaN	NaN	NaN
-96.1278	NaN	NaN	NaN	NaN	NaN	NaN	NaN	NaN	NaN		NaN	NaN	NaN	NaN	NaN	NaN	NaN	NaN	NaN	NaN	NaN	NaN	NaN	NaN	NaN	NaN	NaN	NaN	NaN	NaN	NaN	NaN	NaN	NaN	NaN	NaN	NaN	NaN	NaN	NaN	NaN	NaN	NaN	NaN	NaN	NaN	NaN	NaN	NaN
-96.031	NaN	NaN	NaN	NaN	NaN	NaN	NaN	NaN	NaN		NaN	NaN	NaN	NaN	NaN	NaN	NaN	NaN	NaN	NaN	NaN	NaN	NaN	NaN	NaN	NaN	NaN	NaN	NaN	NaN	NaN	NaN	NaN	NaN	NaN	NaN	NaN	NaN	NaN	NaN	NaN	NaN	NaN	NaN	NaN	NaN	NaN	NaN	NaN
-95.9342	NaN	NaN	NaN	NaN	NaN	NaN	NaN	NaN	NaN		NaN	NaN	NaN	NaN	NaN	NaN	NaN	NaN	NaN	NaN	NaN	NaN	NaN	NaN	NaN	NaN	NaN	NaN	NaN	NaN	NaN	NaN	NaN	NaN	NaN	NaN	NaN	NaN	NaN	NaN	NaN	NaN	NaN	NaN	NaN	NaN	NaN	NaN	NaN
-95.8374	NaN	NaN	NaN	NaN	NaN	NaN	NaN	NaN	NaN		NaN	NaN	NaN	NaN	NaN	NaN	NaN	NaN	NaN	NaN	NaN	NaN	NaN	NaN	NaN	NaN	NaN	NaN	NaN	NaN	NaN	NaN	NaN	NaN	NaN	NaN	NaN	NaN	NaN	NaN	NaN	NaN	NaN	NaN	NaN	NaN	NaN	NaN	NaN
-95.7406	NaN	NaN	NaN	NaN	NaN	NaN	NaN	NaN	NaN		NaN	NaN	NaN	NaN	NaN	NaN	NaN	NaN	NaN	NaN	NaN	NaN	NaN	NaN	NaN	NaN	NaN	NaN	NaN	NaN	NaN	NaN	NaN	NaN	NaN	NaN	NaN	NaN	NaN	NaN	NaN	NaN	NaN	NaN	NaN	NaN	NaN	NaN	NaN
-95.6438	NaN	NaN	NaN	NaN	NaN	NaN	NaN	NaN	NaN		NaN	NaN	NaN	NaN	NaN	NaN	NaN	NaN	NaN	NaN	NaN	NaN	NaN	NaN	NaN	NaN	NaN	NaN	NaN	NaN	NaN	NaN	NaN	NaN	NaN	NaN	NaN	NaN	NaN	NaN	NaN	NaN	NaN	NaN	NaN	NaN	NaN	NaN	NaN
-95.547	NaN	NaN	NaN	NaN	NaN	NaN	NaN	NaN	NaN		NaN	NaN	NaN	NaN	NaN	NaN	NaN	NaN	NaN	NaN	NaN	NaN	NaN	NaN	NaN	NaN	NaN	NaN	NaN	NaN	NaN	NaN	NaN	NaN	NaN	NaN	NaN	NaN	NaN	NaN	NaN	NaN	NaN	NaN	NaN	NaN	NaN	NaN	NaN
-95.4501	NaN	NaN	NaN	NaN	NaN	NaN	NaN	NaN	NaN		NaN	NaN	NaN	NaN	NaN	NaN	NaN	NaN	NaN	NaN	NaN	NaN	NaN	NaN	NaN	NaN	NaN	NaN	NaN	NaN	NaN	NaN	NaN	NaN	NaN	NaN	NaN	NaN	NaN	NaN	NaN	NaN	NaN	NaN	NaN	NaN	NaN	NaN	NaN
-95.3533	NaN	NaN	NaN	NaN	NaN	NaN	NaN	NaN	NaN		NaN	NaN	NaN	NaN	NaN	NaN	NaN	NaN	NaN	NaN	NaN	NaN	NaN	NaN	NaN	NaN	NaN	NaN	NaN	NaN	NaN	NaN	NaN	NaN	NaN	NaN	NaN	NaN	NaN	NaN	NaN	NaN	NaN	NaN	NaN	NaN	NaN	NaN	NaN
-95.2565	NaN	NaN	NaN	NaN	NaN	NaN	NaN	NaN	NaN		NaN	NaN	NaN	NaN	NaN	NaN	NaN	NaN	NaN	NaN	NaN	NaN	NaN	NaN	NaN	NaN	NaN	NaN	NaN	NaN	NaN	NaN	NaN	NaN	NaN	NaN	NaN	NaN	NaN	NaN	NaN	NaN	NaN	NaN	NaN	NaN	NaN	NaN	NaN
-95.1597	NaN	NaN	NaN	NaN	NaN	NaN	NaN	NaN	NaN		NaN	NaN	NaN	NaN	NaN	NaN	NaN	NaN	NaN	NaN	NaN	NaN	NaN	NaN	NaN	NaN	NaN	NaN	NaN	NaN	NaN	NaN	NaN	NaN	NaN	NaN	NaN	NaN	NaN	NaN	NaN	NaN	NaN	NaN	NaN	NaN	NaN	NaN	NaN
-95.0629	NaN	NaN	NaN	NaN	NaN	NaN	NaN	NaN	NaN		NaN	NaN	NaN	NaN	NaN	NaN	NaN	NaN	NaN	NaN	NaN	NaN	NaN	NaN	NaN	NaN	NaN	NaN	NaN	NaN	NaN	NaN	NaN	NaN	NaN	NaN	NaN	NaN	NaN	NaN	NaN	NaN	NaN	NaN	NaN	NaN	NaN	NaN	NaN
-94.9661	NaN	NaN	NaN	NaN	NaN	NaN	NaN	NaN	NaN		NaN	NaN	NaN	NaN	NaN	NaN	NaN	NaN	NaN	NaN	NaN	NaN	NaN	NaN	NaN	NaN	NaN	NaN	NaN	NaN	NaN	NaN	NaN	NaN	NaN	NaN	NaN	NaN	NaN	NaN	NaN	NaN	NaN	NaN	NaN	NaN	NaN	NaN	NaN
-94.8693	NaN	NaN	NaN	NaN	NaN	NaN	NaN	NaN	NaN		NaN	NaN	NaN	NaN	NaN	NaN	NaN	NaN	NaN	NaN	NaN	NaN	NaN	NaN	NaN	NaN	NaN	NaN	NaN	NaN	NaN	NaN	NaN	NaN	NaN	NaN	NaN	NaN	NaN	NaN	NaN	NaN	NaN	NaN	NaN	NaN	NaN	NaN	NaN
-94.7725	NaN	NaN	NaN	NaN	NaN	NaN	NaN	NaN	NaN		NaN	NaN	NaN	NaN	NaN	NaN	NaN	NaN	NaN	NaN	NaN	NaN	NaN	NaN	NaN	NaN	NaN	NaN	NaN	NaN	NaN	NaN	NaN	NaN	NaN	NaN	NaN	NaN	NaN	NaN	NaN	NaN	NaN	NaN	NaN	NaN	NaN	NaN	NaN
-94.6757	NaN	NaN	NaN	NaN	NaN	NaN	NaN	NaN	NaN		NaN	NaN	NaN	NaN	NaN	NaN	NaN	NaN	NaN	NaN	NaN	NaN	NaN	NaN	NaN	NaN	NaN	NaN	NaN	NaN	NaN	NaN	NaN	NaN	NaN	NaN	NaN	NaN	NaN	NaN	NaN	NaN	NaN	NaN	NaN	NaN	NaN	NaN	NaN
-94.5789	NaN	NaN	NaN	NaN	NaN	NaN	NaN	NaN	NaN		NaN	NaN	NaN	NaN	NaN	NaN	NaN	NaN	NaN	NaN	NaN	NaN	NaN	NaN	NaN	NaN	NaN	NaN	NaN	NaN	NaN	NaN	NaN	NaN	NaN	NaN	NaN	NaN	NaN	NaN	NaN	NaN	NaN	NaN	NaN	NaN	NaN	NaN	NaN
-94.4821	NaN	NaN	NaN	NaN	NaN	NaN	NaN	NaN	NaN		NaN	NaN	NaN	NaN	NaN	NaN	NaN	NaN	NaN	NaN	NaN	NaN	NaN	NaN	NaN	NaN	NaN	NaN	NaN	NaN	NaN	NaN	NaN	NaN	NaN	NaN	NaN	NaN	NaN	NaN	NaN	NaN	NaN	NaN	NaN	NaN	NaN	NaN	NaN
-94.3853	NaN	NaN	NaN	NaN	NaN	NaN	NaN	NaN	NaN		NaN	NaN	NaN	NaN	NaN	NaN	NaN	NaN	NaN	NaN	NaN	NaN	NaN	NaN	NaN	NaN	NaN	NaN	NaN	NaN	NaN	NaN	NaN	NaN	NaN	NaN	NaN	NaN	NaN	NaN	NaN	NaN	NaN	NaN	NaN	NaN	NaN	NaN	NaN
-94.2885	NaN	NaN	NaN	NaN	NaN	NaN	NaN	NaN	NaN		NaN	NaN	NaN	NaN	NaN	NaN	NaN	NaN	NaN	NaN	NaN	NaN	NaN	NaN	NaN	NaN	NaN	NaN	NaN	NaN	NaN	NaN	NaN	NaN	NaN	NaN	NaN	NaN	NaN	NaN	NaN	NaN	NaN	NaN	NaN	NaN	NaN	NaN	NaN
-94.1917	NaN	NaN	NaN	NaN	NaN	NaN	NaN	NaN	NaN		NaN	NaN	NaN	NaN	NaN	NaN	NaN	NaN	NaN	NaN	NaN	NaN	NaN	NaN	NaN	NaN	NaN	NaN	NaN	NaN	NaN	NaN	NaN	NaN	NaN	NaN	NaN	NaN	NaN	NaN	NaN	NaN	NaN	NaN	NaN	NaN	NaN	NaN	NaN
-94.0949	NaN	NaN	NaN	NaN	NaN	NaN	NaN	NaN	NaN		NaN	NaN	NaN	NaN	NaN	NaN	NaN	NaN	NaN	NaN	NaN	NaN	NaN	NaN	NaN	NaN	NaN	NaN	NaN	NaN	NaN	NaN	NaN	NaN	NaN	NaN	NaN	NaN	NaN	NaN	NaN	NaN	NaN	NaN	NaN	NaN	NaN	NaN	NaN
-93.9981	NaN	NaN	NaN	NaN	NaN	NaN	NaN	NaN	NaN		NaN	NaN	NaN	NaN	NaN	NaN	NaN	NaN	NaN	NaN	NaN	NaN	NaN	NaN	NaN	NaN	NaN	NaN	NaN	NaN	NaN	NaN	NaN	NaN	NaN	NaN	NaN	NaN	NaN	NaN	NaN	NaN	NaN	NaN	NaN	NaN	NaN	NaN	NaN
-93.9013	NaN	NaN	NaN	NaN	NaN	NaN	NaN	NaN	NaN		NaN	NaN	NaN	NaN	NaN	NaN	NaN	NaN	NaN	NaN	NaN	NaN	NaN	NaN	NaN	NaN	NaN	NaN	NaN	NaN	NaN	NaN	NaN	NaN	NaN	NaN	NaN	NaN	NaN	NaN	NaN	NaN	NaN	NaN	NaN	NaN	NaN	NaN	NaN
-93.8045	NaN	NaN	NaN	NaN	NaN	NaN	NaN	NaN	NaN		NaN	NaN	NaN	NaN	NaN	NaN	NaN	NaN	NaN	NaN	NaN	NaN	NaN	NaN	NaN	NaN	NaN	NaN	NaN	NaN	NaN	NaN	NaN	NaN	NaN	NaN	NaN	NaN	NaN	NaN	NaN	NaN	NaN	NaN	NaN	NaN	NaN	NaN	NaN
-93.7076	NaN	NaN	NaN	NaN	NaN	NaN	NaN	NaN	NaN		NaN	NaN	NaN	NaN	NaN	NaN	NaN	NaN	NaN	NaN	NaN	NaN	NaN	NaN	NaN	NaN	NaN	NaN	NaN	NaN	NaN	NaN	NaN	NaN	NaN	NaN	NaN	NaN	NaN	NaN	NaN	NaN	NaN	NaN	NaN	NaN	NaN	NaN	NaN
-93.6108	NaN	NaN	NaN	NaN	NaN	NaN	NaN	NaN	NaN		NaN	NaN	NaN	NaN	NaN	NaN	NaN	NaN	NaN	NaN	NaN	NaN	NaN	NaN	NaN	NaN	NaN	NaN	NaN	NaN	NaN	NaN	NaN	NaN	NaN	NaN	NaN	NaN	NaN	NaN	NaN	NaN	NaN	NaN	NaN	NaN	NaN	NaN	NaN
-93.514	NaN	NaN	NaN	NaN	NaN	NaN	NaN	NaN	NaN		NaN	NaN	NaN	NaN	NaN	NaN	NaN	NaN	NaN	NaN	NaN	NaN	NaN	NaN	NaN	NaN	NaN	NaN	NaN	NaN	NaN	NaN	NaN	NaN	NaN	NaN	NaN	NaN	NaN	NaN	NaN	NaN	NaN	NaN	NaN	NaN	NaN	NaN	NaN
-93.4172	NaN	NaN	NaN	NaN	NaN	NaN	NaN	NaN	NaN		NaN	NaN	NaN	NaN	NaN	NaN	NaN	NaN	NaN	NaN	NaN	NaN	NaN	NaN	NaN	NaN	NaN	NaN	NaN	NaN	NaN	NaN	NaN	NaN	NaN	NaN	NaN	NaN	NaN	NaN	NaN	NaN	NaN	NaN	NaN	NaN	NaN	NaN	NaN
-93.3204	NaN	NaN	NaN	NaN	NaN	NaN	NaN	NaN	NaN		NaN	NaN	NaN	NaN	NaN	NaN	NaN	NaN	NaN	NaN	NaN	NaN	NaN	NaN	NaN	NaN	NaN	NaN	NaN	NaN	NaN	NaN	NaN	NaN	NaN	NaN	NaN	NaN	NaN	NaN	NaN	NaN	NaN	NaN	NaN	NaN	NaN	NaN	NaN
-93.2236	NaN	NaN	NaN	NaN	NaN	NaN	NaN	NaN	NaN		NaN	NaN	NaN	NaN	NaN	NaN	NaN	NaN	NaN	NaN	NaN	NaN	NaN	NaN	NaN	NaN	NaN	NaN	NaN	NaN	NaN	NaN	NaN	NaN	NaN	NaN	NaN	NaN	NaN	NaN	NaN	NaN	NaN	NaN	NaN	NaN	NaN	NaN	NaN
-93.1268	NaN	NaN	NaN	NaN	NaN	NaN	NaN	NaN	NaN		NaN	NaN	NaN	NaN	NaN	NaN	NaN	NaN	NaN	NaN	NaN	NaN	NaN	NaN	NaN	NaN	NaN	NaN	NaN	NaN	NaN	NaN	NaN	NaN	NaN	NaN	NaN	NaN	NaN	NaN	NaN	NaN	NaN	NaN	NaN	NaN	NaN	NaN	NaN
-93.03	NaN	NaN	NaN	NaN	NaN	NaN	NaN	NaN	NaN		NaN	NaN	NaN	NaN	NaN	NaN	NaN	NaN	NaN	NaN	NaN	NaN	NaN	NaN	NaN	NaN	NaN	NaN	NaN	NaN	NaN	NaN	NaN	NaN	NaN	NaN	NaN	NaN	NaN	NaN	NaN	NaN	NaN	NaN	NaN	NaN	NaN	NaN	NaN
-92.9332	NaN	NaN	NaN	NaN	NaN	NaN	NaN	NaN	NaN		NaN	NaN	NaN	NaN	NaN	NaN	NaN	NaN	NaN	NaN	NaN	NaN	NaN	NaN	NaN	NaN	NaN	NaN	NaN	NaN	NaN	NaN	NaN	NaN	NaN	NaN	NaN	NaN	NaN	NaN	NaN	NaN	NaN	NaN	NaN	NaN	NaN	NaN	NaN
-92.8364	NaN	NaN	NaN	NaN	NaN	NaN	NaN	NaN	NaN		NaN	NaN	NaN	NaN	NaN	NaN	NaN	NaN	NaN	NaN	NaN	NaN	NaN	NaN	NaN	NaN	NaN	NaN	NaN	NaN	NaN	NaN	NaN	NaN	NaN	NaN	NaN	NaN	NaN	NaN	NaN	NaN	NaN	NaN	NaN	NaN	NaN	NaN	NaN
-92.7396	NaN	NaN	NaN	NaN	NaN	NaN	NaN	NaN	NaN		NaN	NaN	NaN	NaN	NaN	NaN	NaN	NaN	NaN	NaN	NaN	NaN	NaN	NaN	NaN	NaN	NaN	NaN	NaN	NaN	NaN	NaN	NaN	NaN	NaN	NaN	NaN	NaN	NaN	NaN	NaN	NaN	NaN	NaN	NaN	NaN	NaN	NaN	NaN
-92.6428	NaN	NaN	NaN	NaN	NaN	NaN	NaN	NaN	NaN		NaN	NaN	NaN	NaN	NaN	NaN	NaN	NaN	NaN	NaN	NaN	NaN	NaN	NaN	NaN	NaN	NaN	NaN	NaN	NaN	NaN	NaN	NaN	NaN	NaN	NaN	NaN	NaN	NaN	NaN	NaN	NaN	NaN	NaN	NaN	NaN	NaN	NaN	NaN
-92.546	NaN	NaN	NaN	NaN	NaN	NaN	NaN	NaN	NaN		NaN	NaN	NaN	NaN	NaN	NaN	NaN	NaN	NaN	NaN	NaN	NaN	NaN	NaN	NaN	NaN	NaN	NaN	NaN	NaN	NaN	NaN	NaN	NaN	NaN	NaN	NaN	NaN	NaN	NaN	NaN	NaN	NaN	NaN	NaN	NaN	NaN	NaN	NaN
-92.4492	NaN	NaN	NaN	NaN	NaN	NaN	NaN	NaN	NaN		NaN	NaN	NaN	NaN	NaN	NaN	NaN	NaN	NaN	NaN	NaN	NaN	NaN	NaN	NaN	NaN	NaN	NaN	NaN	NaN	NaN	NaN	NaN	NaN	NaN	NaN	NaN	NaN	NaN	NaN	NaN	NaN	NaN	NaN	NaN	NaN	NaN	NaN	NaN
-92.3524	NaN	NaN	NaN	NaN	NaN	NaN	NaN	NaN	NaN		NaN	NaN	NaN	NaN	NaN	NaN	NaN	NaN	NaN	NaN	NaN	NaN	NaN	NaN	NaN	NaN	NaN	NaN	NaN	NaN	NaN	NaN	NaN	NaN	NaN	NaN	NaN	NaN	NaN	NaN	NaN	NaN	NaN	NaN	NaN	NaN	NaN	NaN	NaN
-92.2556	NaN	NaN	NaN	NaN	NaN	NaN	NaN	NaN	NaN		NaN	NaN	NaN	NaN	NaN	NaN	NaN	NaN	NaN	NaN	NaN	NaN	NaN	NaN	NaN	NaN	NaN	NaN	NaN	NaN	NaN	NaN	NaN	NaN	NaN	NaN	NaN	NaN	NaN	NaN	NaN	NaN	NaN	NaN	NaN	NaN	NaN	NaN	NaN
-92.1588	NaN	NaN	NaN	NaN	NaN	NaN	NaN	NaN	NaN		NaN	NaN	NaN	NaN	NaN	NaN	NaN	NaN	NaN	NaN	NaN	NaN	NaN	NaN	NaN	NaN	NaN	NaN	NaN	NaN	NaN	NaN	NaN	NaN	NaN	NaN	NaN	NaN	NaN	NaN	NaN	NaN	NaN	NaN	NaN	NaN	NaN	NaN	NaN
-92.062	NaN	NaN	NaN	NaN	NaN	NaN	NaN	NaN	NaN		NaN	NaN	NaN	NaN	NaN	NaN	NaN	NaN	NaN	NaN	NaN	NaN	NaN	NaN	NaN	NaN	NaN	NaN	NaN	NaN	NaN	NaN	NaN	NaN	NaN	NaN	NaN	NaN	NaN	NaN	NaN	NaN	NaN	NaN	NaN	NaN	NaN	NaN	NaN
-91.9652	NaN	NaN	NaN	NaN	NaN	NaN	NaN	NaN	NaN		NaN	NaN	NaN	NaN	NaN	NaN	NaN	NaN	NaN	NaN	NaN	NaN	NaN	NaN	NaN	NaN	NaN	NaN	NaN	NaN	NaN	NaN	NaN	NaN	NaN	NaN	NaN	NaN	NaN	NaN	NaN	NaN	NaN	NaN	NaN	NaN	NaN	NaN	NaN
-91.8683	NaN	NaN	NaN	NaN	NaN	NaN	NaN	NaN	NaN		NaN	NaN	NaN	NaN	NaN	NaN	NaN	NaN	NaN	NaN	NaN	NaN	NaN	NaN	NaN	NaN	NaN	NaN	NaN	NaN	NaN	NaN	NaN	NaN	NaN	NaN	NaN	NaN	NaN	NaN	NaN	NaN	NaN	NaN	NaN	NaN	NaN	NaN	NaN
-91.7715	NaN	NaN	NaN	NaN	NaN	NaN	NaN	NaN	NaN		NaN	NaN	NaN	NaN	NaN	NaN	NaN	NaN	NaN	NaN	NaN	NaN	NaN	NaN	NaN	NaN	NaN	NaN	NaN	NaN	NaN	NaN	NaN	NaN	NaN	NaN	NaN	NaN	NaN	NaN	NaN	NaN	NaN	NaN	NaN	NaN	NaN	NaN	NaN
-91.6747	NaN	NaN	NaN	NaN	NaN	NaN	NaN	NaN	NaN		NaN	NaN	NaN	NaN	NaN	NaN	NaN	NaN	NaN	NaN	NaN	NaN	NaN	NaN	NaN	NaN	NaN	NaN	NaN	NaN	NaN	NaN	NaN	NaN	NaN	NaN	NaN	NaN	NaN	NaN	NaN	NaN	NaN	NaN	NaN	NaN	NaN	NaN	NaN
-91.5779	NaN	NaN	NaN	NaN	NaN	NaN	NaN	NaN	NaN		NaN	NaN	NaN	NaN	NaN	NaN	NaN	NaN	NaN	NaN	NaN	NaN	NaN	NaN	NaN	NaN	NaN	NaN	NaN	NaN	NaN	NaN	NaN	NaN	NaN	NaN	NaN	NaN	NaN	NaN	NaN	NaN	NaN	NaN	NaN	NaN	NaN	NaN	NaN
-91.4811	NaN	NaN	NaN	NaN	NaN	NaN	NaN	NaN	NaN		NaN	NaN	NaN	NaN	NaN	NaN	NaN	NaN	NaN	NaN	NaN	NaN	NaN	NaN	NaN	NaN	NaN	NaN	NaN	NaN	NaN	NaN	NaN	NaN	NaN	NaN	NaN	NaN	NaN	NaN	NaN	NaN	NaN	NaN	NaN	NaN	NaN	NaN	NaN
-91.3843	NaN	NaN	NaN	NaN	NaN	NaN	NaN	NaN	NaN		NaN	NaN	NaN	NaN	NaN	NaN	NaN	NaN	NaN	NaN	NaN	NaN	NaN	NaN	NaN	NaN	NaN	NaN	NaN	NaN	NaN	NaN	NaN	NaN	NaN	NaN	NaN	NaN	NaN	NaN	NaN	NaN	NaN	NaN	NaN	NaN	NaN	NaN	NaN
-91.2875	NaN	NaN	NaN	NaN	NaN	NaN	NaN	NaN	NaN		NaN	NaN	NaN	NaN	NaN	NaN	NaN	NaN	NaN	NaN	NaN	NaN	NaN	NaN	NaN	NaN	NaN	NaN	NaN	NaN	NaN	NaN	NaN	NaN	NaN	NaN	NaN	NaN	NaN	NaN	NaN	NaN	NaN	NaN	NaN	NaN	NaN	NaN	NaN
-91.1907	NaN	NaN	NaN	NaN	NaN	NaN	NaN	NaN	NaN		NaN	NaN	NaN	NaN	NaN	NaN	NaN	NaN	NaN	NaN	NaN	NaN	NaN	NaN	NaN	NaN	NaN	NaN	NaN	NaN	NaN	NaN	NaN	NaN	NaN	NaN	NaN	NaN	NaN	NaN	NaN	NaN	NaN	NaN	NaN	NaN	NaN	NaN	NaN
-91.0939	NaN	NaN	NaN	NaN	NaN	NaN	NaN	NaN	NaN		NaN	NaN	NaN	NaN	NaN	NaN	NaN	NaN	NaN	NaN	NaN	NaN	NaN	NaN	NaN	NaN	NaN	NaN	NaN	NaN	NaN	NaN	NaN	NaN	NaN	NaN	NaN	NaN	NaN	NaN	NaN	NaN	NaN	NaN	NaN	NaN	NaN	NaN	NaN
-90.9971	NaN	NaN	NaN	NaN	NaN	NaN	NaN	NaN	NaN		NaN	NaN	NaN	NaN	NaN	NaN	NaN	NaN	NaN	NaN	NaN	NaN	NaN	NaN	NaN	NaN	NaN	NaN	NaN	NaN	NaN	NaN	NaN	NaN	NaN	NaN	NaN	NaN	NaN	NaN	NaN	NaN	NaN	NaN	NaN	NaN	NaN	NaN	NaN
-90.9003	NaN	NaN	NaN	NaN	NaN	NaN	NaN	NaN	NaN		NaN	NaN	NaN	NaN	NaN	NaN	NaN	NaN	NaN	NaN	NaN	NaN	NaN	NaN	NaN	NaN	NaN	NaN	NaN	NaN	NaN	NaN	NaN	NaN	NaN	NaN	NaN	NaN	NaN	NaN	NaN	NaN	NaN	NaN	NaN	NaN	NaN	NaN	NaN
-90.8035	NaN	NaN	NaN	NaN	NaN	NaN	NaN	NaN	NaN		NaN	NaN	NaN	NaN	NaN	NaN	NaN	NaN	NaN	NaN	NaN	NaN	NaN	NaN	NaN	NaN	NaN	NaN	NaN	NaN	NaN	NaN	NaN	NaN	NaN	NaN	NaN	NaN	NaN	NaN	NaN	NaN	NaN	NaN	NaN	NaN	NaN	NaN	NaN
-90.7067	NaN	NaN	NaN	NaN	NaN	NaN	NaN	NaN	NaN		NaN	NaN	NaN	NaN	NaN	NaN	NaN	NaN	NaN	NaN	NaN	NaN	NaN	NaN	NaN	NaN	NaN	NaN	NaN	NaN	NaN	NaN	NaN	NaN	NaN	NaN	NaN	NaN	NaN	NaN	NaN	NaN	NaN	NaN	NaN	NaN	NaN	NaN	NaN
-90.6099	NaN	NaN	NaN	NaN	NaN	NaN	NaN	NaN	NaN		NaN	NaN	NaN	NaN	NaN	NaN	NaN	NaN	NaN	NaN	NaN	NaN	NaN	NaN	NaN	NaN	NaN	NaN	NaN	NaN	NaN	NaN	NaN	NaN	NaN	NaN	NaN	NaN	NaN	NaN	NaN	NaN	NaN	NaN	NaN	NaN	NaN	NaN	NaN
-90.5131	NaN	NaN	NaN	NaN	NaN	NaN	NaN	NaN	NaN		NaN	NaN	NaN	NaN	NaN	NaN	NaN	NaN	NaN	NaN	NaN	NaN	NaN	NaN	NaN	NaN	NaN	NaN	NaN	NaN	NaN	NaN	NaN	NaN	NaN	NaN	NaN	NaN	NaN	NaN	NaN	NaN	NaN	NaN	NaN	NaN	NaN	NaN	NaN
-90.4163	NaN	NaN	NaN	NaN	NaN	NaN	NaN	NaN	NaN		NaN	NaN	NaN	NaN	NaN	NaN	NaN	NaN	NaN	NaN	NaN	NaN	NaN	NaN	NaN	NaN	NaN	NaN	NaN	NaN	NaN	NaN	NaN	NaN	NaN	NaN	NaN	NaN	NaN	NaN	NaN	NaN	NaN	NaN	NaN	NaN	NaN	NaN	NaN
-90.3195	NaN	NaN	NaN	NaN	NaN	NaN	NaN	NaN	NaN		NaN	NaN	NaN	NaN	NaN	NaN	NaN	NaN	NaN	NaN	NaN	NaN	NaN	NaN	NaN	NaN	NaN	NaN	NaN	NaN	NaN	NaN	NaN	NaN	NaN	NaN	NaN	NaN	NaN	NaN	NaN	NaN	NaN	NaN	NaN	NaN	NaN	NaN	NaN
-90.2227	NaN	NaN	NaN	NaN	NaN	NaN	NaN	NaN	NaN		NaN	NaN	NaN	NaN	NaN	NaN	NaN	NaN	NaN	NaN	NaN	NaN	NaN	NaN	NaN	NaN	NaN	NaN	NaN	NaN	NaN	NaN	NaN	NaN	NaN	NaN	NaN	NaN	NaN	NaN	NaN	NaN	NaN	NaN	NaN	NaN	NaN	NaN	NaN
-90.1258	NaN	NaN	NaN	NaN	NaN	NaN	NaN	NaN	NaN		NaN	NaN	NaN	NaN	NaN	NaN	NaN	NaN	NaN	NaN	NaN	NaN	NaN	NaN	NaN	NaN	NaN	NaN	NaN	NaN	NaN	NaN	NaN	NaN	NaN	NaN	NaN	NaN	NaN	NaN	NaN	NaN	NaN	NaN	NaN	NaN	NaN	NaN	NaN
-90.029	NaN	NaN	NaN	NaN	NaN	NaN	NaN	NaN	NaN		NaN	NaN	NaN	NaN	NaN	NaN	NaN	NaN	NaN	NaN	NaN	NaN	NaN	NaN	NaN	NaN	NaN	NaN	NaN	NaN	NaN	NaN	NaN	NaN	NaN	NaN	NaN	NaN	NaN	NaN	NaN	NaN	NaN	NaN	NaN	NaN	NaN	NaN	NaN
-89.9322	NaN	NaN	NaN	NaN	NaN	NaN	NaN	NaN	NaN		NaN	NaN	NaN	NaN	NaN	NaN	NaN	NaN	NaN	NaN	NaN	NaN	NaN	NaN	NaN	NaN	NaN	NaN	NaN	NaN	NaN	NaN	NaN	NaN	NaN	NaN	NaN	NaN	NaN	NaN	NaN	NaN	NaN	NaN	NaN	NaN	NaN	NaN	NaN
-89.8354	NaN	NaN	NaN	NaN	NaN	NaN	NaN	NaN	NaN		NaN	NaN	NaN	NaN	NaN	NaN	NaN	NaN	NaN	NaN	NaN	NaN	NaN	NaN	NaN	NaN	NaN	NaN	NaN	NaN	NaN	NaN	NaN	NaN	NaN	NaN	NaN	NaN	NaN	NaN	NaN	NaN	NaN	NaN	NaN	NaN	NaN	NaN	NaN
-89.7386	NaN	NaN	NaN	NaN	NaN	NaN	NaN	NaN	NaN		NaN	NaN	NaN	NaN	NaN	NaN	NaN	NaN	NaN	NaN	NaN	NaN	NaN	NaN	NaN	NaN	NaN	NaN	NaN	NaN	NaN	NaN	NaN	NaN	NaN	NaN	NaN	NaN	NaN	NaN	NaN	NaN	NaN	NaN	NaN	NaN	NaN	NaN	NaN
-89.6418	NaN	NaN	NaN	NaN	NaN	NaN	NaN	NaN	NaN		NaN	NaN	NaN	NaN	NaN	NaN	NaN	NaN	NaN	NaN	NaN	NaN	NaN	NaN	NaN	NaN	NaN	NaN	NaN	NaN	NaN	NaN	NaN	NaN	NaN	NaN	NaN	NaN	NaN	NaN	NaN	NaN	NaN	NaN	NaN	NaN	NaN	NaN	NaN
-89.545	NaN	NaN	NaN	NaN	NaN	NaN	NaN	NaN	NaN		NaN	NaN	NaN	NaN	NaN	NaN	NaN	NaN	NaN	NaN	NaN	NaN	NaN	NaN	NaN	NaN	NaN	NaN	NaN	NaN	NaN	NaN	NaN	NaN	NaN	NaN	NaN	NaN	NaN	NaN	NaN	NaN	NaN	NaN	NaN	NaN	NaN	NaN	NaN
-89.4482	NaN	NaN	NaN	NaN	NaN	NaN	NaN	NaN	NaN		NaN	NaN	NaN	NaN	NaN	NaN	NaN	NaN	NaN	NaN	NaN	NaN	NaN	NaN	NaN	NaN	NaN	NaN	NaN	NaN	NaN	NaN	NaN	NaN	NaN	NaN	NaN	NaN	NaN	NaN	NaN	NaN	NaN	NaN	NaN	NaN	NaN	NaN	NaN
-89.3514	NaN	NaN	NaN	NaN	NaN	NaN	NaN	NaN	NaN		NaN	NaN	NaN	NaN	NaN	NaN	NaN	NaN	NaN	NaN	NaN	NaN	NaN	NaN	NaN	NaN	NaN	NaN	NaN	NaN	NaN	NaN	NaN	NaN	NaN	NaN	NaN	NaN	NaN	NaN	NaN	NaN	NaN	NaN	NaN	NaN	NaN	NaN	NaN
-89.2546	NaN	NaN	NaN	NaN	NaN	NaN	NaN	NaN	NaN		NaN	NaN	NaN	NaN	NaN	NaN	NaN	NaN	NaN	NaN	NaN	NaN	NaN	NaN	NaN	NaN	NaN	NaN	NaN	NaN	NaN	NaN	NaN	NaN	NaN	NaN	NaN	NaN	NaN	NaN	NaN	NaN	NaN	NaN	NaN	NaN	NaN	NaN	NaN
-89.1578	NaN	NaN	NaN	NaN	NaN	NaN	NaN	NaN	NaN		NaN	NaN	NaN	NaN	NaN	NaN	NaN	NaN	NaN	NaN	NaN	NaN	NaN	NaN	NaN	NaN	NaN	NaN	NaN	NaN	NaN	NaN	NaN	NaN	NaN	NaN	NaN	NaN	NaN	NaN	NaN	NaN	NaN	NaN	NaN	NaN	NaN	NaN	NaN
-89.061	NaN	NaN	NaN	NaN	NaN	NaN	NaN	NaN	NaN		NaN	NaN	NaN	NaN	NaN	NaN	NaN	NaN	NaN	NaN	NaN	NaN	NaN	NaN	NaN	NaN	NaN	NaN	NaN	NaN	NaN	NaN	NaN	NaN	NaN	NaN	NaN	NaN	NaN	NaN	NaN	NaN	NaN	NaN	NaN	NaN	NaN	NaN	NaN
-88.9642	NaN	NaN	NaN	NaN	NaN	NaN	NaN	NaN	NaN		NaN	NaN	NaN	NaN	NaN	NaN	NaN	NaN	NaN	NaN	NaN	NaN	NaN	NaN	NaN	NaN	NaN	NaN	NaN	NaN	NaN	NaN	NaN	NaN	NaN	NaN	NaN	NaN	NaN	NaN	NaN	NaN	NaN	NaN	NaN	NaN	NaN	NaN	NaN
-88.8674	NaN	NaN	NaN	NaN	NaN	NaN	NaN	NaN	NaN		NaN	NaN	NaN	NaN	NaN	NaN	NaN	NaN	NaN	NaN	NaN	NaN	NaN	NaN	NaN	NaN	NaN	NaN	NaN	NaN	NaN	NaN	NaN	NaN	NaN	NaN	NaN	NaN	NaN	NaN	NaN	NaN	NaN	NaN	NaN	NaN	NaN	NaN	NaN
-88.7706	NaN	NaN	NaN	NaN	NaN	NaN	NaN	NaN	NaN		NaN	NaN	NaN	NaN	NaN	NaN	NaN	NaN	NaN	NaN	NaN	NaN	NaN	NaN	NaN	NaN	NaN	NaN	NaN	NaN	NaN	NaN	NaN	NaN	NaN	NaN	NaN	NaN	NaN	NaN	NaN	NaN	NaN	NaN	NaN	NaN	NaN	NaN	NaN
-88.6738	NaN	NaN	NaN	NaN	NaN	NaN	NaN	NaN	NaN		NaN	NaN	NaN	NaN	NaN	NaN	NaN	NaN	NaN	NaN	NaN	NaN	NaN	NaN	NaN	NaN	NaN	NaN	NaN	NaN	NaN	NaN	NaN	NaN	NaN	NaN	NaN	NaN	NaN	NaN	NaN	NaN	NaN	NaN	NaN	NaN	NaN	NaN	NaN
-88.577	NaN	NaN	NaN	NaN	NaN	NaN	NaN	NaN	NaN		NaN	NaN	NaN	NaN	NaN	NaN	NaN	NaN	NaN	NaN	NaN	NaN	NaN	NaN	NaN	NaN	NaN	NaN	NaN	NaN	NaN	NaN	NaN	NaN	NaN	NaN	NaN	NaN	NaN	NaN	NaN	NaN	NaN	NaN	NaN	NaN	NaN	NaN	NaN
-88.4802	NaN	NaN	NaN	NaN	NaN	NaN	NaN	NaN	NaN		NaN	NaN	NaN	NaN	NaN	NaN	NaN	NaN	NaN	NaN	NaN	NaN	NaN	NaN	NaN	NaN	NaN	NaN	NaN	NaN	NaN	NaN	NaN	NaN	NaN	NaN	NaN	NaN	NaN	NaN	NaN	NaN	NaN	NaN	NaN	NaN	NaN	NaN	NaN
-88.3833	NaN	NaN	NaN	NaN	NaN	NaN	NaN	NaN	NaN		NaN	NaN	NaN	NaN	NaN	NaN	NaN	NaN	NaN	NaN	NaN	NaN	NaN	NaN	NaN	NaN	NaN	NaN	NaN	NaN	NaN	NaN	NaN	NaN	NaN	NaN	NaN	NaN	NaN	NaN	NaN	NaN	NaN	NaN	NaN	NaN	NaN	NaN	NaN
-88.2865	NaN	NaN	NaN	NaN	NaN	NaN	NaN	NaN	NaN		NaN	NaN	NaN	NaN	NaN	NaN	NaN	NaN	NaN	NaN	NaN	NaN	NaN	NaN	NaN	NaN	NaN	NaN	NaN	NaN	NaN	NaN	NaN	NaN	NaN	NaN	NaN	NaN	NaN	NaN	NaN	NaN	NaN	NaN	NaN	NaN	NaN	NaN	NaN
-88.1897	NaN	NaN	NaN	NaN	NaN	NaN	NaN	NaN	NaN		NaN	NaN	NaN	NaN	NaN	NaN	NaN	NaN	NaN	NaN	NaN	NaN	NaN	NaN	NaN	NaN	NaN	NaN	NaN	NaN	NaN	NaN	NaN	NaN	NaN	NaN	NaN	NaN	NaN	NaN	NaN	NaN	NaN	NaN	NaN	NaN	NaN	NaN	NaN
-88.0929	NaN	NaN	NaN	NaN	NaN	NaN	NaN	NaN	NaN		NaN	NaN	NaN	NaN	NaN	NaN	NaN	NaN	NaN	NaN	NaN	NaN	NaN	NaN	NaN	NaN	NaN	NaN	NaN	NaN	NaN	NaN	NaN	NaN	NaN	NaN	NaN	NaN	NaN	NaN	NaN	NaN	NaN	NaN	NaN	NaN	NaN	NaN	NaN
-87.9961	NaN	NaN	NaN	NaN	NaN	NaN	NaN	NaN	NaN		NaN	NaN	NaN	NaN	NaN	NaN	NaN	NaN	NaN	NaN	NaN	NaN	NaN	NaN	NaN	NaN	NaN	NaN	NaN	NaN	NaN	NaN	NaN	NaN	NaN	NaN	NaN	NaN	NaN	NaN	NaN	NaN	NaN	NaN	NaN	NaN	NaN	NaN	NaN
-87.8993	NaN	NaN	NaN	NaN	NaN	NaN	NaN	NaN	NaN		NaN	NaN	NaN	NaN	NaN	NaN	NaN	NaN	NaN	NaN	NaN	NaN	NaN	NaN	NaN	NaN	NaN	NaN	NaN	NaN	NaN	NaN	NaN	NaN	NaN	NaN	NaN	NaN	NaN	NaN	NaN	NaN	NaN	NaN	NaN	NaN	NaN	NaN	NaN
-87.8025	NaN	NaN	NaN	NaN	NaN	NaN	NaN	NaN	NaN		NaN	NaN	NaN	NaN	NaN	NaN	NaN	NaN	NaN	NaN	NaN	NaN	NaN	NaN	NaN	NaN	NaN	NaN	NaN	NaN	NaN	NaN	NaN	NaN	NaN	NaN	NaN	NaN	NaN	NaN	NaN	NaN	NaN	NaN	NaN	NaN	NaN	NaN	NaN
-87.7057	NaN	NaN	NaN	NaN	NaN	NaN	NaN	NaN	NaN		NaN	NaN	NaN	NaN	NaN	NaN	NaN	NaN	NaN	NaN	NaN	NaN	NaN	NaN	NaN	NaN	NaN	NaN	NaN	NaN	NaN	NaN	NaN	NaN	NaN	NaN	NaN	NaN	NaN	NaN	NaN	NaN	NaN	NaN	NaN	NaN	NaN	NaN	NaN
-87.6089	NaN	NaN	NaN	NaN	NaN	NaN	NaN	NaN	NaN		NaN	NaN	NaN	NaN	NaN	NaN	NaN	NaN	NaN	NaN	NaN	NaN	NaN	NaN	NaN	NaN	NaN	NaN	NaN	NaN	NaN	NaN	NaN	NaN	NaN	NaN	NaN	NaN	NaN	NaN	NaN	NaN	NaN	NaN	NaN	NaN	NaN	NaN	NaN
-87.5121	NaN	NaN	NaN	NaN	NaN	NaN	NaN	NaN	NaN		NaN	NaN	NaN	NaN	NaN	NaN	NaN	NaN	NaN	NaN	NaN	NaN	NaN	NaN	NaN	NaN	NaN	NaN	NaN	NaN	NaN	NaN	NaN	NaN	NaN	NaN	NaN	NaN	NaN	NaN	NaN	NaN	NaN	NaN	NaN	NaN	NaN	NaN	NaN
-87.4153	NaN	NaN	NaN	NaN	NaN	NaN	NaN	NaN	NaN		NaN	NaN	NaN	NaN	NaN	NaN	NaN	NaN	NaN	NaN	NaN	NaN	NaN	NaN	NaN	NaN	NaN	NaN	NaN	NaN	NaN	NaN	NaN	NaN	NaN	NaN	NaN	NaN	NaN	NaN	NaN	NaN	NaN	NaN	NaN	NaN	NaN	NaN	NaN
-87.3185	NaN	NaN	NaN	NaN	NaN	NaN	NaN	NaN	NaN		NaN	NaN	NaN	NaN	NaN	NaN	NaN	NaN	NaN	NaN	NaN	NaN	NaN	NaN	NaN	NaN	NaN	NaN	NaN	NaN	NaN	NaN	NaN	NaN	NaN	NaN	NaN	NaN	NaN	NaN	NaN	NaN	NaN	NaN	NaN	NaN	NaN	NaN	NaN
-87.2217	NaN	NaN	NaN	NaN	NaN	NaN	NaN	NaN	NaN		NaN	NaN	NaN	NaN	NaN	NaN	NaN	NaN	NaN	NaN	NaN	NaN	NaN	NaN	NaN	NaN	NaN	NaN	NaN	NaN	NaN	NaN	NaN	NaN	NaN	NaN	NaN	NaN	NaN	NaN	NaN	NaN	NaN	NaN	NaN	NaN	NaN	NaN	NaN
-87.1249	NaN	NaN	NaN	NaN	NaN	NaN	NaN	NaN	NaN		NaN	NaN	NaN	NaN	NaN	NaN	NaN	NaN	NaN	NaN	NaN	NaN	NaN	NaN	NaN	NaN	NaN	NaN	NaN	NaN	NaN	NaN	NaN	NaN	NaN	NaN	NaN	NaN	NaN	NaN	NaN	NaN	NaN	NaN	NaN	NaN	NaN	NaN	NaN
-87.0281	NaN	NaN	NaN	NaN	NaN	NaN	NaN	NaN	NaN		NaN	NaN	NaN	NaN	NaN	NaN	NaN	NaN	NaN	NaN	NaN	NaN	NaN	NaN	NaN	NaN	NaN	NaN	NaN	NaN	NaN	NaN	NaN	NaN	NaN	NaN	NaN	NaN	NaN	NaN	NaN	NaN	NaN	NaN	NaN	NaN	NaN	NaN	NaN
-86.9313	NaN	NaN	NaN	NaN	NaN	NaN	NaN	NaN	NaN		NaN	NaN	NaN	NaN	NaN	NaN	NaN	NaN	NaN	NaN	NaN	NaN	NaN	NaN	NaN	NaN	NaN	NaN	NaN	NaN	NaN	NaN	NaN	NaN	NaN	NaN	NaN	NaN	NaN	NaN	NaN	NaN	NaN	NaN	NaN	NaN	NaN	NaN	NaN
-86.8345	NaN	NaN	NaN	NaN	NaN	NaN	NaN	NaN	NaN		NaN	NaN	NaN	NaN	NaN	NaN	NaN	NaN	NaN	NaN	NaN	NaN	NaN	NaN	NaN	NaN	NaN	NaN	NaN	NaN	NaN	NaN	NaN	NaN	NaN	NaN	NaN	NaN	NaN	NaN	NaN	NaN	NaN	NaN	NaN	NaN	NaN	NaN	NaN
-86.7377	NaN	NaN	NaN	NaN	NaN	NaN	NaN	NaN	NaN		NaN	NaN	NaN	NaN	NaN	NaN	NaN	NaN	NaN	NaN	NaN	NaN	NaN	NaN	NaN	NaN	NaN	NaN	NaN	NaN	NaN	NaN	NaN	NaN	NaN	NaN	NaN	NaN	NaN	NaN	NaN	NaN	NaN	NaN	NaN	NaN	NaN	NaN	NaN
-86.6409	NaN	NaN	NaN	NaN	NaN	NaN	NaN	NaN	NaN		NaN	NaN	NaN	NaN	NaN	NaN	NaN	NaN	NaN	NaN	NaN	NaN	NaN	NaN	NaN	NaN	NaN	NaN	NaN	NaN	NaN	NaN	NaN	NaN	NaN	NaN	NaN	NaN	NaN	NaN	NaN	NaN	NaN	NaN	NaN	NaN	NaN	NaN	NaN
-86.544	NaN	NaN	NaN	NaN	NaN	NaN	NaN	NaN	NaN		NaN	NaN	NaN	NaN	NaN	NaN	NaN	NaN	NaN	NaN	NaN	NaN	NaN	NaN	NaN	NaN	NaN	NaN	NaN	NaN	NaN	NaN	NaN	NaN	NaN	NaN	NaN	NaN	NaN	NaN	NaN	NaN	NaN	NaN	NaN	NaN	NaN	NaN	NaN
-86.4472	NaN	NaN	NaN	NaN	NaN	NaN	NaN	NaN	NaN		NaN	NaN	NaN	NaN	NaN	NaN	NaN	NaN	NaN	NaN	NaN	NaN	NaN	NaN	NaN	NaN	NaN	NaN	NaN	NaN	NaN	NaN	NaN	NaN	NaN	NaN	NaN	NaN	NaN	NaN	NaN	NaN	NaN	NaN	NaN	NaN	NaN	NaN	NaN
-86.3504	NaN	NaN	NaN	NaN	NaN	NaN	NaN	NaN	NaN		NaN	NaN	NaN	NaN	NaN	NaN	NaN	NaN	NaN	NaN	NaN	NaN	NaN	NaN	NaN	NaN	NaN	NaN	NaN	NaN	NaN	NaN	NaN	NaN	NaN	NaN	NaN	NaN	NaN	NaN	NaN	NaN	NaN	NaN	NaN	NaN	NaN	NaN	NaN
-86.2536	NaN	NaN	NaN	NaN	NaN	NaN	NaN	NaN	NaN		NaN	NaN	NaN	NaN	NaN	NaN	NaN	NaN	NaN	NaN	NaN	NaN	NaN	NaN	NaN	NaN	NaN	NaN	NaN	NaN	NaN	NaN	NaN	NaN	NaN	NaN	NaN	NaN	NaN	NaN	NaN	NaN	NaN	NaN	NaN	NaN	NaN	NaN	NaN
-86.1568	NaN	NaN	NaN	NaN	NaN	NaN	NaN	NaN	NaN		NaN	NaN	NaN	NaN	NaN	NaN	NaN	NaN	NaN	NaN	NaN	NaN	NaN	NaN	NaN	NaN	NaN	NaN	NaN	NaN	NaN	NaN	NaN	NaN	NaN	NaN	NaN	NaN	NaN	NaN	NaN	NaN	NaN	NaN	NaN	NaN	NaN	NaN	NaN
-86.06	NaN	NaN	NaN	NaN	NaN	NaN	NaN	NaN	NaN		NaN	NaN	NaN	NaN	NaN	NaN	NaN	NaN	NaN	NaN	NaN	NaN	NaN	NaN	NaN	NaN	NaN	NaN	NaN	NaN	NaN	NaN	NaN	NaN	NaN	NaN	NaN	NaN	NaN	NaN	NaN	NaN	NaN	NaN	NaN	NaN	NaN	NaN	NaN
-85.9632	NaN	NaN	NaN	NaN	NaN	NaN	NaN	NaN	NaN		NaN	NaN	NaN	NaN	NaN	NaN	NaN	NaN	NaN	NaN	NaN	NaN	NaN	NaN	NaN	NaN	NaN	NaN	NaN	NaN	NaN	NaN	NaN	NaN	NaN	NaN	NaN	NaN	NaN	NaN	NaN	NaN	NaN	NaN	NaN	NaN	NaN	NaN	NaN
-85.8664	NaN	NaN	NaN	NaN	NaN	NaN	NaN	NaN	NaN		NaN	NaN	NaN	NaN	NaN	NaN	NaN	NaN	NaN	NaN	NaN	NaN	NaN	NaN	NaN	NaN	NaN	NaN	NaN	NaN	NaN	NaN	NaN	NaN	NaN	NaN	NaN	NaN	NaN	NaN	NaN	NaN	NaN	NaN	NaN	NaN	NaN	NaN	NaN
-85.7696	NaN	NaN	NaN	NaN	NaN	NaN	NaN	NaN	NaN		NaN	NaN	NaN	NaN	NaN	NaN	NaN	NaN	NaN	NaN	NaN	NaN	NaN	NaN	NaN	NaN	NaN	NaN	NaN	NaN	NaN	NaN	NaN	NaN	NaN	NaN	NaN	NaN	NaN	NaN	NaN	NaN	NaN	NaN	NaN	NaN	NaN	NaN	NaN
-85.6728	NaN	NaN	NaN	NaN	NaN	NaN	NaN	NaN	NaN		NaN	NaN	NaN	NaN	NaN	NaN	NaN	NaN	NaN	NaN	NaN	NaN	NaN	NaN	NaN	NaN	NaN	NaN	NaN	NaN	NaN	NaN	NaN	NaN	NaN	NaN	NaN	NaN	NaN	NaN	NaN	NaN	NaN	NaN	NaN	NaN	NaN	NaN	NaN
-85.576	NaN	NaN	NaN	NaN	NaN	NaN	NaN	NaN	NaN		NaN	NaN	NaN	NaN	NaN	NaN	NaN	NaN	NaN	NaN	NaN	NaN	NaN	NaN	NaN	NaN	NaN	NaN	NaN	NaN	NaN	NaN	NaN	NaN	NaN	NaN	NaN	NaN	NaN	NaN	NaN	NaN	NaN	NaN	NaN	NaN	NaN	NaN	NaN
-85.4792	NaN	NaN	NaN	NaN	NaN	NaN	NaN	NaN	NaN		NaN	NaN	NaN	NaN	NaN	NaN	NaN	NaN	NaN	NaN	NaN	NaN	NaN	NaN	NaN	NaN	NaN	NaN	NaN	NaN	NaN	NaN	NaN	NaN	NaN	NaN	NaN	NaN	NaN	NaN	NaN	NaN	NaN	NaN	NaN	NaN	NaN	NaN	NaN
-85.3824	NaN	NaN	NaN	NaN	NaN	NaN	NaN	NaN	NaN		NaN	NaN	NaN	NaN	NaN	NaN	NaN	NaN	NaN	NaN	NaN	NaN	NaN	NaN	NaN	NaN	NaN	NaN	NaN	NaN	NaN	NaN	NaN	NaN	NaN	NaN	NaN	NaN	NaN	NaN	NaN	NaN	NaN	NaN	NaN	NaN	NaN	NaN	NaN
-85.2856	NaN	NaN	NaN	NaN	NaN	NaN	NaN	NaN	NaN		NaN	NaN	NaN	NaN	NaN	NaN	NaN	NaN	NaN	NaN	NaN	NaN	NaN	NaN	NaN	NaN	NaN	NaN	NaN	NaN	NaN	NaN	NaN	NaN	NaN	NaN	NaN	NaN	NaN	NaN	NaN	NaN	NaN	NaN	NaN	NaN	NaN	NaN	NaN
-85.1888	NaN	NaN	NaN	NaN	NaN	NaN	NaN	NaN	NaN		NaN	NaN	NaN	NaN	NaN	NaN	NaN	NaN	NaN	NaN	NaN	NaN	NaN	NaN	NaN	NaN	NaN	NaN	NaN	NaN	NaN	NaN	NaN	NaN	NaN	NaN	NaN	NaN	NaN	NaN	NaN	NaN	NaN	NaN	NaN	NaN	NaN	NaN	NaN
-85.092	NaN	NaN	NaN	NaN	NaN	NaN	NaN	NaN	NaN		NaN	NaN	NaN	NaN	NaN	NaN	NaN	NaN	NaN	NaN	NaN	NaN	NaN	NaN	NaN	NaN	NaN	NaN	NaN	NaN	NaN	NaN	NaN	NaN	NaN	NaN	NaN	NaN	NaN	NaN	NaN	NaN	NaN	NaN	NaN	NaN	NaN	NaN	NaN
-84.9952	NaN	NaN	NaN	NaN	NaN	NaN	NaN	NaN	NaN		NaN	NaN	NaN	NaN	NaN	NaN	NaN	NaN	NaN	NaN	NaN	NaN	NaN	NaN	NaN	NaN	NaN	NaN	NaN	NaN	NaN	NaN	NaN	NaN	NaN	NaN	NaN	NaN	NaN	NaN	NaN	NaN	NaN	NaN	NaN	NaN	NaN	NaN	NaN
-84.8984	NaN	NaN	NaN	NaN	NaN	NaN	NaN	NaN	NaN		NaN	NaN	NaN	NaN	NaN	NaN	NaN	NaN	NaN	NaN	NaN	NaN	NaN	NaN	NaN	NaN	NaN	NaN	NaN	NaN	NaN	NaN	NaN	NaN	NaN	NaN	NaN	NaN	NaN	NaN	NaN	NaN	NaN	NaN	NaN	NaN	NaN	NaN	NaN
-84.8015	NaN	NaN	NaN	NaN	NaN	NaN	NaN	NaN	NaN		NaN	NaN	NaN	NaN	NaN	NaN	NaN	NaN	NaN	NaN	NaN	NaN	NaN	NaN	NaN	NaN	NaN	NaN	NaN	NaN	NaN	NaN	NaN	NaN	NaN	NaN	NaN	NaN	NaN	NaN	NaN	NaN	NaN	NaN	NaN	NaN	NaN	NaN	NaN
-84.7047	NaN	NaN	NaN	NaN	NaN	NaN	NaN	NaN	NaN		NaN	NaN	NaN	NaN	NaN	NaN	NaN	NaN	NaN	NaN	NaN	NaN	NaN	NaN	NaN	NaN	NaN	NaN	NaN	NaN	NaN	NaN	NaN	NaN	NaN	NaN	NaN	NaN	NaN	NaN	NaN	NaN	NaN	NaN	NaN	NaN	NaN	NaN	NaN
-84.6079	NaN	NaN	NaN	NaN	NaN	NaN	NaN	NaN	NaN		NaN	NaN	NaN	NaN	NaN	NaN	NaN	NaN	NaN	NaN	NaN	NaN	NaN	NaN	NaN	NaN	NaN	NaN	NaN	NaN	NaN	NaN	NaN	NaN	NaN	NaN	NaN	NaN	NaN	NaN	NaN	NaN	NaN	NaN	NaN	NaN	NaN	NaN	NaN
-84.5111	NaN	NaN	NaN	NaN	NaN	NaN	NaN	NaN	NaN		NaN	NaN	NaN	NaN	NaN	NaN	NaN	NaN	NaN	NaN	NaN	NaN	NaN	NaN	NaN	NaN	NaN	NaN	NaN	NaN	NaN	NaN	NaN	NaN	NaN	NaN	NaN	NaN	NaN	NaN	NaN	NaN	NaN	NaN	NaN	NaN	NaN	NaN	NaN
-84.4143	NaN	NaN	NaN	NaN	NaN	NaN	NaN	NaN	NaN		NaN	NaN	NaN	NaN	NaN	NaN	NaN	NaN	NaN	NaN	NaN	NaN	NaN	NaN	NaN	NaN	NaN	NaN	NaN	NaN	NaN	NaN	NaN	NaN	NaN	NaN	NaN	NaN	NaN	NaN	NaN	NaN	NaN	NaN	NaN	NaN	NaN	NaN	NaN
-84.3175	NaN	NaN	NaN	NaN	NaN	NaN	NaN	NaN	NaN		NaN	NaN	NaN	NaN	NaN	NaN	NaN	NaN	NaN	NaN	NaN	NaN	NaN	NaN	NaN	NaN	NaN	NaN	NaN	NaN	NaN	NaN	NaN	NaN	NaN	NaN	NaN	NaN	NaN	NaN	NaN	NaN	NaN	NaN	NaN	NaN	NaN	NaN	NaN
-84.2207	NaN	NaN	NaN	NaN	NaN	NaN	NaN	NaN	NaN		NaN	NaN	NaN	NaN	NaN	NaN	NaN	NaN	NaN	NaN	NaN	NaN	NaN	NaN	NaN	NaN	NaN	NaN	NaN	NaN	NaN	NaN	NaN	NaN	NaN	NaN	NaN	NaN	NaN	NaN	NaN	NaN	NaN	NaN	NaN	NaN	NaN	NaN	NaN
-84.1239	NaN	NaN	NaN	NaN	NaN	NaN	NaN	NaN	NaN		NaN	NaN	NaN	NaN	NaN	NaN	NaN	NaN	NaN	NaN	NaN	NaN	NaN	NaN	NaN	NaN	NaN	NaN	NaN	NaN	NaN	NaN	NaN	NaN	NaN	NaN	NaN	NaN	NaN	NaN	NaN	NaN	NaN	NaN	NaN	NaN	NaN	NaN	NaN
-84.0271	NaN	NaN	NaN	NaN	NaN	NaN	NaN	NaN	NaN		NaN	NaN	NaN	NaN	NaN	NaN	NaN	NaN	NaN	NaN	NaN	NaN	NaN	NaN	NaN	NaN	NaN	NaN	NaN	NaN	NaN	NaN	NaN	NaN	NaN	NaN	NaN	NaN	NaN	NaN	NaN	NaN	NaN	NaN	NaN	NaN	NaN	NaN	NaN
-83.9303	NaN	NaN	NaN	NaN	NaN	NaN	NaN	NaN	NaN		NaN	NaN	NaN	NaN	NaN	NaN	NaN	NaN	NaN	NaN	NaN	NaN	NaN	NaN	NaN	NaN	NaN	NaN	NaN	NaN	NaN	NaN	NaN	NaN	NaN	NaN	NaN	NaN	NaN	NaN	NaN	NaN	NaN	NaN	NaN	NaN	NaN	NaN	NaN
-83.8335	NaN	NaN	NaN	NaN	NaN	NaN	NaN	NaN	NaN		NaN	NaN	NaN	NaN	NaN	NaN	NaN	NaN	NaN	NaN	NaN	NaN	NaN	NaN	NaN	NaN	NaN	NaN	NaN	NaN	NaN	NaN	NaN	NaN	NaN	NaN	NaN	NaN	NaN	NaN	NaN	NaN	NaN	NaN	NaN	NaN	NaN	NaN	NaN
-83.7367	NaN	NaN	NaN	NaN	NaN	NaN	NaN	NaN	NaN		NaN	NaN	NaN	NaN	NaN	NaN	NaN	NaN	NaN	NaN	NaN	NaN	NaN	NaN	NaN	NaN	NaN	NaN	NaN	NaN	NaN	NaN	NaN	NaN	NaN	NaN	NaN	NaN	NaN	NaN	NaN	NaN	NaN	NaN	NaN	NaN	NaN	NaN	NaN
-83.6399	NaN	NaN	NaN	NaN	NaN	NaN	NaN	NaN	NaN		NaN	NaN	NaN	NaN	NaN	NaN	NaN	NaN	NaN	NaN	NaN	NaN	NaN	NaN	NaN	NaN	NaN	NaN	NaN	NaN	NaN	NaN	NaN	NaN	NaN	NaN	NaN	NaN	NaN	NaN	NaN	NaN	NaN	NaN	NaN	NaN	NaN	NaN	NaN
-83.5431	NaN	NaN	NaN	NaN	NaN	NaN	NaN	NaN	NaN		NaN	NaN	NaN	NaN	NaN	NaN	NaN	NaN	NaN	NaN	NaN	NaN	NaN	NaN	NaN	NaN	NaN	NaN	NaN	NaN	NaN	NaN	NaN	NaN	NaN	NaN	NaN	NaN	NaN	NaN	NaN	NaN	NaN	NaN	NaN	NaN	NaN	NaN	NaN
-83.4463	NaN	NaN	NaN	NaN	NaN	NaN	NaN	NaN	NaN		NaN	NaN	NaN	NaN	NaN	NaN	NaN	NaN	NaN	NaN	NaN	NaN	NaN	NaN	NaN	NaN	NaN	NaN	NaN	NaN	NaN	NaN	NaN	NaN	NaN	NaN	NaN	NaN	NaN	NaN	NaN	NaN	NaN	NaN	NaN	NaN	NaN	NaN	NaN
-83.3495	NaN	NaN	NaN	NaN	NaN	NaN	NaN	NaN	NaN		NaN	NaN	NaN	NaN	NaN	NaN	NaN	NaN	NaN	NaN	NaN	NaN	NaN	NaN	NaN	NaN	NaN	NaN	NaN	NaN	NaN	NaN	NaN	NaN	NaN	NaN	NaN	NaN	NaN	NaN	NaN	NaN	NaN	NaN	NaN	NaN	NaN	NaN	NaN
-83.2527	NaN	NaN	NaN	NaN	NaN	NaN	NaN	NaN	NaN		NaN	NaN	NaN	NaN	NaN	NaN	NaN	NaN	NaN	NaN	NaN	NaN	NaN	NaN	NaN	NaN	NaN	NaN	NaN	NaN	NaN	NaN	NaN	NaN	NaN	NaN	NaN	NaN	NaN	NaN	NaN	NaN	NaN	NaN	NaN	NaN	NaN	NaN	NaN
-83.1559	NaN	NaN	NaN	NaN	NaN	NaN	NaN	NaN	NaN		NaN	NaN	NaN	NaN	NaN	NaN	NaN	NaN	NaN	NaN	NaN	NaN	NaN	NaN	NaN	NaN	NaN	NaN	NaN	NaN	NaN	NaN	NaN	NaN	NaN	NaN	NaN	NaN	NaN	NaN	NaN	NaN	NaN	NaN	NaN	NaN	NaN	NaN	NaN
-83.0591	NaN	NaN	NaN	NaN	NaN	NaN	NaN	NaN	NaN		NaN	NaN	NaN	NaN	NaN	NaN	NaN	NaN	NaN	NaN	NaN	NaN	NaN	NaN	NaN	NaN	NaN	NaN	NaN	NaN	NaN	NaN	NaN	NaN	NaN	NaN	NaN	NaN	NaN	NaN	NaN	NaN	NaN	NaN	NaN	NaN	NaN	NaN	NaN
-82.9622	NaN	NaN	NaN	NaN	NaN	NaN	NaN	NaN	NaN		NaN	NaN	NaN	NaN	NaN	NaN	NaN	NaN	NaN	NaN	NaN	NaN	NaN	NaN	NaN	NaN	NaN	NaN	NaN	NaN	NaN	NaN	NaN	NaN	NaN	NaN	NaN	NaN	NaN	NaN	NaN	NaN	NaN	NaN	NaN	NaN	NaN	NaN	NaN
-82.8654	NaN	NaN	NaN	NaN	NaN	NaN	NaN	NaN	NaN		NaN	NaN	NaN	NaN	NaN	NaN	NaN	NaN	NaN	NaN	NaN	NaN	NaN	NaN	NaN	NaN	NaN	NaN	NaN	NaN	NaN	NaN	NaN	NaN	NaN	NaN	NaN	NaN	NaN	NaN	NaN	NaN	NaN	NaN	NaN	NaN	NaN	NaN	NaN
-82.7686	NaN	NaN	NaN	NaN	NaN	NaN	NaN	NaN	NaN		NaN	NaN	NaN	NaN	NaN	NaN	NaN	NaN	NaN	NaN	NaN	NaN	NaN	NaN	NaN	NaN	NaN	NaN	NaN	NaN	NaN	NaN	NaN	NaN	NaN	NaN	NaN	NaN	NaN	NaN	NaN	NaN	NaN	NaN	NaN	NaN	NaN	NaN	NaN
-82.6718	NaN	NaN	NaN	NaN	NaN	NaN	NaN	NaN	NaN		NaN	NaN	NaN	NaN	NaN	NaN	NaN	NaN	NaN	NaN	NaN	NaN	NaN	NaN	NaN	NaN	NaN	NaN	NaN	NaN	NaN	NaN	NaN	NaN	NaN	NaN	NaN	NaN	NaN	NaN	NaN	NaN	NaN	NaN	NaN	NaN	NaN	NaN	NaN
-82.575	NaN	NaN	NaN	NaN	NaN	NaN	NaN	NaN	NaN		NaN	NaN	NaN	NaN	NaN	NaN	NaN	NaN	NaN	NaN	NaN	NaN	NaN	NaN	NaN	NaN	NaN	NaN	NaN	NaN	NaN	NaN	NaN	NaN	NaN	NaN	NaN	NaN	NaN	NaN	NaN	NaN	NaN	NaN	NaN	NaN	NaN	NaN	NaN
-82.4782	NaN	NaN	NaN	NaN	NaN	NaN	NaN	NaN	NaN		NaN	NaN	NaN	NaN	NaN	NaN	NaN	NaN	NaN	NaN	NaN	NaN	NaN	NaN	NaN	NaN	NaN	NaN	NaN	NaN	NaN	NaN	NaN	NaN	NaN	NaN	NaN	NaN	NaN	NaN	NaN	NaN	NaN	NaN	NaN	NaN	NaN	NaN	NaN
-82.3814	NaN	NaN	NaN	NaN	NaN	NaN	NaN	NaN	NaN		NaN	NaN	NaN	NaN	NaN	NaN	NaN	NaN	NaN	NaN	NaN	NaN	NaN	NaN	NaN	NaN	NaN	NaN	NaN	NaN	NaN	NaN	NaN	NaN	NaN	NaN	NaN	NaN	NaN	NaN	NaN	NaN	NaN	NaN	NaN	NaN	NaN	NaN	NaN
-82.2846	NaN	NaN	NaN	NaN	NaN	NaN	NaN	NaN	NaN		NaN	NaN	NaN	NaN	NaN	NaN	NaN	NaN	NaN	NaN	NaN	NaN	NaN	NaN	NaN	NaN	NaN	NaN	NaN	NaN	NaN	NaN	NaN	NaN	NaN	NaN	NaN	NaN	NaN	NaN	NaN	NaN	NaN	NaN	NaN	NaN	NaN	NaN	NaN
-82.1878	NaN	NaN	NaN	NaN	NaN	NaN	NaN	NaN	NaN		NaN	NaN	NaN	NaN	NaN	NaN	NaN	NaN	NaN	NaN	NaN	NaN	NaN	NaN	NaN	NaN	NaN	NaN	NaN	NaN	NaN	NaN	NaN	NaN	NaN	NaN	NaN	NaN	NaN	NaN	NaN	NaN	NaN	NaN	NaN	NaN	NaN	NaN	NaN
-82.091	NaN	NaN	NaN	NaN	NaN	NaN	NaN	NaN	NaN		NaN	NaN	NaN	NaN	NaN	NaN	NaN	NaN	NaN	NaN	NaN	NaN	NaN	NaN	NaN	NaN	NaN	NaN	NaN	NaN	NaN	NaN	NaN	NaN	NaN	NaN	NaN	NaN	NaN	NaN	NaN	NaN	NaN	NaN	NaN	NaN	NaN	NaN	NaN
-81.9942	NaN	NaN	NaN	NaN	NaN	NaN	NaN	NaN	NaN		NaN	NaN	NaN	NaN	NaN	NaN	NaN	NaN	NaN	NaN	NaN	NaN	NaN	NaN	NaN	NaN	NaN	NaN	NaN	NaN	NaN	NaN	NaN	NaN	NaN	NaN	NaN	NaN	NaN	NaN	NaN	NaN	NaN	NaN	NaN	NaN	NaN	NaN	NaN
-81.8974	NaN	NaN	NaN	NaN	NaN	NaN	NaN	NaN	NaN		NaN	NaN	NaN	NaN	NaN	NaN	NaN	NaN	NaN	NaN	NaN	NaN	NaN	NaN	NaN	NaN	NaN	NaN	NaN	NaN	NaN	NaN	NaN	NaN	NaN	NaN	NaN	NaN	NaN	NaN	NaN	NaN	NaN	NaN	NaN	NaN	NaN	NaN	NaN
-81.8006	NaN	NaN	NaN	NaN	NaN	NaN	NaN	NaN	NaN		NaN	NaN	NaN	NaN	NaN	NaN	NaN	NaN	NaN	NaN	NaN	NaN	NaN	NaN	NaN	NaN	NaN	NaN	NaN	NaN	NaN	NaN	NaN	NaN	NaN	NaN	NaN	NaN	NaN	NaN	NaN	NaN	NaN	NaN	NaN	NaN	NaN	NaN	NaN
-81.7038	NaN	NaN	NaN	NaN	NaN	NaN	NaN	NaN	NaN		NaN	NaN	NaN	NaN	NaN	NaN	NaN	NaN	NaN	NaN	NaN	NaN	NaN	NaN	NaN	NaN	NaN	NaN	NaN	NaN	NaN	NaN	NaN	NaN	NaN	NaN	NaN	NaN	NaN	NaN	NaN	NaN	NaN	NaN	NaN	NaN	NaN	NaN	NaN
-81.607	NaN	NaN	NaN	NaN	NaN	NaN	NaN	NaN	NaN		NaN	NaN	NaN	NaN	NaN	NaN	NaN	NaN	NaN	NaN	NaN	NaN	NaN	NaN	NaN	NaN	NaN	NaN	NaN	NaN	NaN	NaN	NaN	NaN	NaN	NaN	NaN	NaN	NaN	NaN	NaN	NaN	NaN	NaN	NaN	NaN	NaN	NaN	NaN
-81.5102	NaN	NaN	NaN	NaN	NaN	NaN	NaN	NaN	NaN		NaN	NaN	NaN	NaN	NaN	NaN	NaN	NaN	NaN	NaN	NaN	NaN	NaN	NaN	NaN	NaN	NaN	NaN	NaN	NaN	NaN	NaN	NaN	NaN	NaN	NaN	NaN	NaN	NaN	NaN	NaN	NaN	NaN	NaN	NaN	NaN	NaN	NaN	NaN
-81.4134	NaN	NaN	NaN	NaN	NaN	NaN	NaN	NaN	NaN		NaN	NaN	NaN	NaN	NaN	NaN	NaN	NaN	NaN	NaN	NaN	NaN	NaN	NaN	NaN	NaN	NaN	NaN	NaN	NaN	NaN	NaN	NaN	NaN	NaN	NaN	NaN	NaN	NaN	NaN	NaN	NaN	NaN	NaN	NaN	NaN	NaN	NaN	NaN
-81.3166	NaN	NaN	NaN	NaN	NaN	NaN	NaN	NaN	NaN		NaN	NaN	NaN	NaN	NaN	NaN	NaN	NaN	NaN	NaN	NaN	NaN	NaN	NaN	NaN	NaN	NaN	NaN	NaN	NaN	NaN	NaN	NaN	NaN	NaN	NaN	NaN	NaN	NaN	NaN	NaN	NaN	NaN	NaN	NaN	NaN	NaN	NaN	NaN
-81.2197	NaN	NaN	NaN	NaN	NaN	NaN	NaN	NaN	NaN		NaN	NaN	NaN	NaN	NaN	NaN	NaN	NaN	NaN	NaN	NaN	NaN	NaN	NaN	NaN	NaN	NaN	NaN	NaN	NaN	NaN	NaN	NaN	NaN	NaN	NaN	NaN	NaN	NaN	NaN	NaN	NaN	NaN	NaN	NaN	NaN	NaN	NaN	NaN
-81.1229	NaN	NaN	NaN	NaN	NaN	NaN	NaN	NaN	NaN		NaN	NaN	NaN	NaN	NaN	NaN	NaN	NaN	NaN	NaN	NaN	NaN	NaN	NaN	NaN	NaN	NaN	NaN	NaN	NaN	NaN	NaN	NaN	NaN	NaN	NaN	NaN	NaN	NaN	NaN	NaN	NaN	NaN	NaN	NaN	NaN	NaN	NaN	NaN
-81.0261	NaN	NaN	NaN	NaN	NaN	NaN	NaN	NaN	NaN		NaN	NaN	NaN	NaN	NaN	NaN	NaN	NaN	NaN	NaN	NaN	NaN	NaN	NaN	NaN	NaN	NaN	NaN	NaN	NaN	NaN	NaN	NaN	NaN	NaN	NaN	NaN	NaN	NaN	NaN	NaN	NaN	NaN	NaN	NaN	NaN	NaN	NaN	NaN
-80.9293	NaN	NaN	NaN	NaN	NaN	NaN	NaN	NaN	NaN		NaN	NaN	NaN	NaN	NaN	NaN	NaN	NaN	NaN	NaN	NaN	NaN	NaN	NaN	NaN	NaN	NaN	NaN	NaN	NaN	NaN	NaN	NaN	NaN	NaN	NaN	NaN	NaN	NaN	NaN	NaN	NaN	NaN	NaN	NaN	NaN	NaN	NaN	NaN
-80.8325	NaN	NaN	NaN	NaN	NaN	NaN	NaN	NaN	NaN		NaN	NaN	NaN	NaN	NaN	NaN	NaN	NaN	NaN	NaN	NaN	NaN	NaN	NaN	NaN	NaN	NaN	NaN	NaN	NaN	NaN	NaN	NaN	NaN	NaN	NaN	NaN	NaN	NaN	NaN	NaN	NaN	NaN	NaN	NaN	NaN	NaN	NaN	NaN
-80.7357	NaN	NaN	NaN	NaN	NaN	NaN	NaN	NaN	NaN		NaN	NaN	NaN	NaN	NaN	NaN	NaN	NaN	NaN	NaN	NaN	NaN	NaN	NaN	NaN	NaN	NaN	NaN	NaN	NaN	NaN	NaN	NaN	NaN	NaN	NaN	NaN	NaN	NaN	NaN	NaN	NaN	NaN	NaN	NaN	NaN	NaN	NaN	NaN
-80.6389	NaN	NaN	NaN	NaN	NaN	NaN	NaN	NaN	NaN		NaN	NaN	NaN	NaN	NaN	NaN	NaN	NaN	NaN	NaN	NaN	NaN	NaN	NaN	NaN	NaN	NaN	NaN	NaN	NaN	NaN	NaN	NaN	NaN	NaN	NaN	NaN	NaN	NaN	NaN	NaN	NaN	NaN	NaN	NaN	NaN	NaN	NaN	NaN
-80.5421	NaN	NaN	NaN	NaN	NaN	NaN	NaN	NaN	NaN		NaN	NaN	NaN	NaN	NaN	NaN	NaN	NaN	NaN	NaN	NaN	NaN	NaN	NaN	NaN	NaN	NaN	NaN	NaN	NaN	NaN	NaN	NaN	NaN	NaN	NaN	NaN	NaN	NaN	NaN	NaN	NaN	NaN	NaN	NaN	NaN	NaN	NaN	NaN
-80.4453	NaN	NaN	NaN	NaN	NaN	NaN	NaN	NaN	NaN		NaN	NaN	NaN	NaN	NaN	NaN	NaN	NaN	NaN	NaN	NaN	NaN	NaN	NaN	NaN	NaN	NaN	NaN	NaN	NaN	NaN	NaN	NaN	NaN	NaN	NaN	NaN	NaN	NaN	NaN	NaN	NaN	NaN	NaN	NaN	NaN	NaN	NaN	NaN
-80.3485	NaN	NaN	NaN	NaN	NaN	NaN	NaN	NaN	NaN		NaN	NaN	NaN	NaN	NaN	NaN	NaN	NaN	NaN	NaN	NaN	NaN	NaN	NaN	NaN	NaN	NaN	NaN	NaN	NaN	NaN	NaN	NaN	NaN	NaN	NaN	NaN	NaN	NaN	NaN	NaN	NaN	NaN	NaN	NaN	NaN	NaN	NaN	NaN
-80.2517	NaN	NaN	NaN	NaN	NaN	NaN	NaN	NaN	NaN		NaN	NaN	NaN	NaN	NaN	NaN	NaN	NaN	NaN	NaN	NaN	NaN	NaN	NaN	NaN	NaN	NaN	NaN	NaN	NaN	NaN	NaN	NaN	NaN	NaN	NaN	NaN	NaN	NaN	NaN	NaN	NaN	NaN	NaN	NaN	NaN	NaN	NaN	NaN
-80.1549	NaN	NaN	NaN	NaN	NaN	NaN	NaN	NaN	NaN		NaN	NaN	NaN	NaN	NaN	NaN	NaN	NaN	NaN	NaN	NaN	NaN	NaN	NaN	NaN	NaN	NaN	NaN	NaN	NaN	NaN	NaN	NaN	NaN	NaN	NaN	NaN	NaN	NaN	NaN	NaN	NaN	NaN	NaN	NaN	NaN	NaN	NaN	NaN
-80.0581	NaN	NaN	NaN	NaN	NaN	NaN	NaN	NaN	NaN		NaN	NaN	NaN	NaN	NaN	NaN	NaN	NaN	NaN	NaN	NaN	NaN	NaN	NaN	NaN	NaN	NaN	NaN	NaN	NaN	NaN	NaN	NaN	NaN	NaN	NaN	NaN	NaN	NaN	NaN	NaN	NaN	NaN	NaN	NaN	NaN	NaN	NaN	NaN
-79.9613	NaN	NaN	NaN	NaN	NaN	NaN	NaN	NaN	NaN		NaN	NaN	NaN	NaN	NaN	NaN	NaN	NaN	NaN	NaN	NaN	NaN	NaN	NaN	NaN	NaN	NaN	NaN	NaN	NaN	NaN	NaN	NaN	NaN	NaN	NaN	NaN	NaN	NaN	NaN	NaN	NaN	NaN	NaN	NaN	NaN	NaN	NaN	NaN
-79.8645	NaN	NaN	NaN	NaN	NaN	NaN	NaN	NaN	NaN		NaN	NaN	NaN	NaN	NaN	NaN	NaN	NaN	NaN	NaN	NaN	NaN	NaN	NaN	NaN	NaN	NaN	NaN	NaN	NaN	NaN	NaN	NaN	NaN	NaN	NaN	NaN	NaN	NaN	NaN	NaN	NaN	NaN	NaN	NaN	NaN	NaN	NaN	NaN
-79.7677	NaN	NaN	NaN	NaN	NaN	NaN	NaN	NaN	NaN		NaN	NaN	NaN	NaN	NaN	NaN	NaN	NaN	NaN	NaN	NaN	NaN	NaN	NaN	NaN	NaN	NaN	NaN	NaN	NaN	NaN	NaN	NaN	NaN	NaN	NaN	NaN	NaN	NaN	NaN	NaN	NaN	NaN	NaN	NaN	NaN	NaN	NaN	NaN
-79.6709	NaN	NaN	NaN	NaN	NaN	NaN	NaN	NaN	NaN		NaN	NaN	NaN	NaN	NaN	NaN	NaN	NaN	NaN	NaN	NaN	NaN	NaN	NaN	NaN	NaN	NaN	NaN	NaN	NaN	NaN	NaN	NaN	NaN	NaN	NaN	NaN	NaN	NaN	NaN	NaN	NaN	NaN	NaN	NaN	NaN	NaN	NaN	NaN
-79.5741	NaN	NaN	NaN	NaN	NaN	NaN	NaN	NaN	NaN		NaN	NaN	NaN	NaN	NaN	NaN	NaN	NaN	NaN	NaN	NaN	NaN	NaN	NaN	NaN	NaN	NaN	NaN	NaN	NaN	NaN	NaN	NaN	NaN	NaN	NaN	NaN	NaN	NaN	NaN	NaN	NaN	NaN	NaN	NaN	NaN	NaN	NaN	NaN
-79.4773	NaN	NaN	NaN	NaN	NaN	NaN	NaN	NaN	NaN		NaN	NaN	NaN	NaN	NaN	NaN	NaN	NaN	NaN	NaN	NaN	NaN	NaN	NaN	NaN	NaN	NaN	NaN	NaN	NaN	NaN	NaN	NaN	NaN	NaN	NaN	NaN	NaN	NaN	NaN	NaN	NaN	NaN	NaN	NaN	NaN	NaN	NaN	NaN
-79.3804	NaN	NaN	NaN	NaN	NaN	NaN	NaN	NaN	NaN		NaN	NaN	NaN	NaN	NaN	NaN	NaN	NaN	NaN	NaN	NaN	NaN	NaN	NaN	NaN	NaN	NaN	NaN	NaN	NaN	NaN	NaN	NaN	NaN	NaN	NaN	NaN	NaN	NaN	NaN	NaN	NaN	NaN	NaN	NaN	NaN	NaN	NaN	NaN
-79.2836	NaN	NaN	NaN	NaN	NaN	NaN	NaN	NaN	NaN		NaN	NaN	NaN	NaN	NaN	NaN	NaN	NaN	NaN	NaN	NaN	NaN	NaN	NaN	NaN	NaN	NaN	NaN	NaN	NaN	NaN	NaN	NaN	NaN	NaN	NaN	NaN	NaN	NaN	NaN	NaN	NaN	NaN	NaN	NaN	NaN	NaN	NaN	NaN
-79.1868	NaN	NaN	NaN	NaN	NaN	NaN	NaN	NaN	NaN		NaN	NaN	NaN	NaN	NaN	NaN	NaN	NaN	NaN	NaN	NaN	NaN	NaN	NaN	NaN	NaN	NaN	NaN	NaN	NaN	NaN	NaN	NaN	NaN	NaN	NaN	NaN	NaN	NaN	NaN	NaN	NaN	NaN	NaN	NaN	NaN	NaN	NaN	NaN
-79.09	NaN	NaN	NaN	NaN	NaN	NaN	NaN	NaN	NaN		NaN	NaN	NaN	NaN	NaN	NaN	NaN	NaN	NaN	NaN	NaN	NaN	NaN	NaN	NaN	NaN	NaN	NaN	NaN	NaN	NaN	NaN	NaN	NaN	NaN	NaN	NaN	NaN	NaN	NaN	NaN	NaN	NaN	NaN	NaN	NaN	NaN	NaN	NaN
-78.9932	NaN	NaN	NaN	NaN	NaN	NaN	NaN	NaN	NaN		NaN	NaN	NaN	NaN	NaN	NaN	NaN	NaN	NaN	NaN	NaN	NaN	NaN	NaN	NaN	NaN	NaN	NaN	NaN	NaN	NaN	NaN	NaN	NaN	NaN	NaN	NaN	NaN	NaN	NaN	NaN	NaN	NaN	NaN	NaN	NaN	NaN	NaN	NaN
-78.8964	NaN	NaN	NaN	NaN	NaN	NaN	NaN	NaN	NaN		NaN	NaN	NaN	NaN	NaN	NaN	NaN	NaN	NaN	NaN	NaN	NaN	NaN	NaN	NaN	NaN	NaN	NaN	NaN	NaN	NaN	NaN	NaN	NaN	NaN	NaN	NaN	NaN	NaN	NaN	NaN	NaN	NaN	NaN	NaN	NaN	NaN	NaN	NaN
-78.7996	NaN	NaN	NaN	NaN	NaN	NaN	NaN	NaN	NaN		NaN	NaN	NaN	NaN	NaN	NaN	NaN	NaN	NaN	NaN	NaN	NaN	NaN	NaN	NaN	NaN	NaN	NaN	NaN	NaN	NaN	NaN	NaN	NaN	NaN	NaN	NaN	NaN	NaN	NaN	NaN	NaN	NaN	NaN	NaN	NaN	NaN	NaN	NaN
-78.7028	NaN	NaN	NaN	NaN	NaN	NaN	NaN	NaN	NaN		NaN	NaN	NaN	NaN	NaN	NaN	NaN	NaN	NaN	NaN	NaN	NaN	NaN	NaN	NaN	NaN	NaN	NaN	NaN	NaN	NaN	NaN	NaN	NaN	NaN	NaN	NaN	NaN	NaN	NaN	NaN	NaN	NaN	NaN	NaN	NaN	NaN	NaN	NaN
-78.606	NaN	NaN	NaN	NaN	NaN	NaN	NaN	NaN	NaN		NaN	NaN	NaN	NaN	NaN	NaN	NaN	NaN	NaN	NaN	NaN	NaN	NaN	NaN	NaN	NaN	NaN	NaN	NaN	NaN	NaN	NaN	NaN	NaN	NaN	NaN	NaN	NaN	NaN	NaN	NaN	NaN	NaN	NaN	NaN	NaN	NaN	NaN	NaN
-78.5092	NaN	NaN	NaN	NaN	NaN	NaN	NaN	NaN	NaN		NaN	NaN	NaN	NaN	NaN	NaN	NaN	NaN	NaN	NaN	NaN	NaN	NaN	NaN	NaN	NaN	NaN	NaN	NaN	NaN	NaN	NaN	NaN	NaN	NaN	NaN	NaN	NaN	NaN	NaN	NaN	NaN	NaN	NaN	NaN	NaN	NaN	NaN	NaN
-78.4124	NaN	NaN	NaN	NaN	NaN	NaN	NaN	NaN	NaN		NaN	NaN	NaN	NaN	NaN	NaN	NaN	NaN	NaN	NaN	NaN	NaN	NaN	NaN	NaN	NaN	NaN	NaN	NaN	NaN	NaN	NaN	NaN	NaN	NaN	NaN	NaN	NaN	NaN	NaN	NaN	NaN	NaN	NaN	NaN	NaN	NaN	NaN	NaN
-78.3156	NaN	NaN	NaN	NaN	NaN	NaN	NaN	NaN	NaN		NaN	NaN	NaN	NaN	NaN	NaN	NaN	NaN	NaN	NaN	NaN	NaN	NaN	NaN	NaN	NaN	NaN	NaN	NaN	NaN	NaN	NaN	NaN	NaN	NaN	NaN	NaN	NaN	NaN	NaN	NaN	NaN	NaN	NaN	NaN	NaN	NaN	NaN	NaN
-78.2188	NaN	NaN	NaN	NaN	NaN	NaN	NaN	NaN	NaN		NaN	NaN	NaN	NaN	NaN	NaN	NaN	NaN	NaN	NaN	NaN	NaN	NaN	NaN	NaN	NaN	NaN	NaN	NaN	NaN	NaN	NaN	NaN	NaN	NaN	NaN	NaN	NaN	NaN	NaN	NaN	NaN	NaN	NaN	NaN	NaN	NaN	NaN	NaN
-78.122	NaN	NaN	NaN	NaN	NaN	NaN	NaN	NaN	NaN		NaN	NaN	NaN	NaN	NaN	NaN	NaN	NaN	NaN	NaN	NaN	NaN	NaN	NaN	NaN	NaN	NaN	NaN	NaN	NaN	NaN	NaN	NaN	NaN	NaN	NaN	NaN	NaN	NaN	NaN	NaN	NaN	NaN	NaN	NaN	NaN	NaN	NaN	NaN
-78.0252	NaN	NaN	NaN	NaN	NaN	NaN	NaN	NaN	NaN		NaN	NaN	NaN	NaN	NaN	NaN	NaN	NaN	NaN	NaN	NaN	NaN	NaN	NaN	NaN	NaN	NaN	NaN	NaN	NaN	NaN	NaN	NaN	NaN	NaN	NaN	NaN	NaN	NaN	NaN	NaN	NaN	NaN	NaN	NaN	NaN	NaN	NaN	NaN
-77.9284	NaN	NaN	NaN	NaN	NaN	NaN	NaN	NaN	NaN		NaN	NaN	NaN	NaN	NaN	NaN	NaN	NaN	NaN	NaN	NaN	NaN	NaN	NaN	NaN	NaN	NaN	NaN	NaN	NaN	NaN	NaN	NaN	NaN	NaN	NaN	NaN	NaN	NaN	NaN	NaN	NaN	NaN	NaN	NaN	NaN	NaN	NaN	NaN
-77.8316	NaN	NaN	NaN	NaN	NaN	NaN	NaN	NaN	NaN		NaN	NaN	NaN	NaN	NaN	NaN	NaN	NaN	NaN	NaN	NaN	NaN	NaN	NaN	NaN	NaN	NaN	NaN	NaN	NaN	NaN	NaN	NaN	NaN	NaN	NaN	NaN	NaN	NaN	NaN	NaN	NaN	NaN	NaN	NaN	NaN	NaN	NaN	NaN
-77.7348	NaN	NaN	NaN	NaN	NaN	NaN	NaN	NaN	NaN		NaN	NaN	NaN	NaN	NaN	NaN	NaN	NaN	NaN	NaN	NaN	NaN	NaN	NaN	NaN	NaN	NaN	NaN	NaN	NaN	NaN	NaN	NaN	NaN	NaN	NaN	NaN	NaN	NaN	NaN	NaN	NaN	NaN	NaN	NaN	NaN	NaN	NaN	NaN
-77.6379	NaN	NaN	NaN	NaN	NaN	NaN	NaN	NaN	NaN		NaN	NaN	NaN	NaN	NaN	NaN	NaN	NaN	NaN	NaN	NaN	NaN	NaN	NaN	NaN	NaN	NaN	NaN	NaN	NaN	NaN	NaN	NaN	NaN	NaN	NaN	NaN	NaN	NaN	NaN	NaN	NaN	NaN	NaN	NaN	NaN	NaN	NaN	NaN
-77.5411	NaN	NaN	NaN	NaN	NaN	NaN	NaN	NaN	NaN		NaN	NaN	NaN	NaN	NaN	NaN	NaN	NaN	NaN	NaN	NaN	NaN	NaN	NaN	NaN	NaN	NaN	NaN	NaN	NaN	NaN	NaN	NaN	NaN	NaN	NaN	NaN	NaN	NaN	NaN	NaN	NaN	NaN	NaN	NaN	NaN	NaN	NaN	NaN
-77.4443	NaN	NaN	NaN	NaN	NaN	NaN	NaN	NaN	NaN		NaN	NaN	NaN	NaN	NaN	NaN	NaN	NaN	NaN	NaN	NaN	NaN	NaN	NaN	NaN	NaN	NaN	NaN	NaN	NaN	NaN	NaN	NaN	NaN	NaN	NaN	NaN	NaN	NaN	NaN	NaN	NaN	NaN	NaN	NaN	NaN	NaN	NaN	NaN
-77.3475	NaN	NaN	NaN	NaN	NaN	NaN	NaN	NaN	NaN		NaN	NaN	NaN	NaN	NaN	NaN	NaN	NaN	NaN	NaN	NaN	NaN	NaN	NaN	NaN	NaN	NaN	NaN	NaN	NaN	NaN	NaN	NaN	NaN	NaN	NaN	NaN	NaN	NaN	NaN	NaN	NaN	NaN	NaN	NaN	NaN	NaN	NaN	NaN
-77.2507	NaN	NaN	NaN	NaN	NaN	NaN	NaN	NaN	NaN		NaN	NaN	NaN	NaN	NaN	NaN	NaN	NaN	NaN	NaN	NaN	NaN	NaN	NaN	NaN	NaN	NaN	NaN	NaN	NaN	NaN	NaN	NaN	NaN	NaN	NaN	NaN	NaN	NaN	NaN	NaN	NaN	NaN	NaN	NaN	NaN	NaN	NaN	NaN
-77.1539	NaN	NaN	NaN	NaN	NaN	NaN	NaN	NaN	NaN		NaN	NaN	NaN	NaN	NaN	NaN	NaN	NaN	NaN	NaN	NaN	NaN	NaN	NaN	NaN	NaN	NaN	NaN	NaN	NaN	NaN	NaN	NaN	NaN	NaN	NaN	NaN	NaN	NaN	NaN	NaN	NaN	NaN	NaN	NaN	NaN	NaN	NaN	NaN
-77.0571	NaN	NaN	NaN	NaN	NaN	NaN	NaN	NaN	NaN		NaN	NaN	NaN	NaN	NaN	NaN	NaN	NaN	NaN	NaN	NaN	NaN	NaN	NaN	NaN	NaN	NaN	NaN	NaN	NaN	NaN	NaN	NaN	NaN	NaN	NaN	NaN	NaN	NaN	NaN	NaN	NaN	NaN	NaN	NaN	NaN	NaN	NaN	NaN
-76.9603	NaN	NaN	NaN	NaN	NaN	NaN	NaN	NaN	NaN		NaN	NaN	NaN	NaN	NaN	NaN	NaN	NaN	NaN	NaN	NaN	NaN	NaN	NaN	NaN	NaN	NaN	NaN	NaN	NaN	NaN	NaN	NaN	NaN	NaN	NaN	NaN	NaN	NaN	NaN	NaN	NaN	NaN	NaN	NaN	NaN	NaN	NaN	NaN
-76.8635	NaN	NaN	NaN	NaN	NaN	NaN	NaN	NaN	NaN		NaN	NaN	NaN	NaN	NaN	NaN	NaN	NaN	NaN	NaN	NaN	NaN	NaN	NaN	NaN	NaN	NaN	NaN	NaN	NaN	NaN	NaN	NaN	NaN	NaN	NaN	NaN	NaN	NaN	NaN	NaN	NaN	NaN	NaN	NaN	NaN	NaN	NaN	NaN
-76.7667	NaN	NaN	NaN	NaN	NaN	NaN	NaN	NaN	NaN		NaN	NaN	NaN	NaN	NaN	NaN	NaN	NaN	NaN	NaN	NaN	NaN	NaN	NaN	NaN	NaN	NaN	NaN	NaN	NaN	NaN	NaN	NaN	NaN	NaN	NaN	NaN	NaN	NaN	NaN	NaN	NaN	NaN	NaN	NaN	NaN	NaN	NaN	NaN
-76.6699	NaN	NaN	NaN	NaN	NaN	NaN	NaN	NaN	NaN		NaN	NaN	NaN	NaN	NaN	NaN	NaN	NaN	NaN	NaN	NaN	NaN	NaN	NaN	NaN	NaN	NaN	NaN	NaN	NaN	NaN	NaN	NaN	NaN	NaN	NaN	NaN	NaN	NaN	NaN	NaN	NaN	NaN	NaN	NaN	NaN	NaN	NaN	NaN
-76.5731	NaN	NaN	NaN	NaN	NaN	NaN	NaN	NaN	NaN		NaN	NaN	NaN	NaN	NaN	NaN	NaN	NaN	NaN	NaN	NaN	NaN	NaN	NaN	NaN	NaN	NaN	NaN	NaN	NaN	NaN	NaN	NaN	NaN	NaN	NaN	NaN	NaN	NaN	NaN	NaN	NaN	NaN	NaN	NaN	NaN	NaN	NaN	NaN
-76.4763	NaN	NaN	NaN	NaN	NaN	NaN	NaN	NaN	NaN		NaN	NaN	NaN	NaN	NaN	NaN	NaN	NaN	NaN	NaN	NaN	NaN	NaN	NaN	NaN	NaN	NaN	NaN	NaN	NaN	NaN	NaN	NaN	NaN	NaN	NaN	NaN	NaN	NaN	NaN	NaN	NaN	NaN	NaN	NaN	NaN	NaN	NaN	NaN
-76.3795	NaN	NaN	NaN	NaN	NaN	NaN	NaN	NaN	NaN		NaN	NaN	NaN	NaN	NaN	NaN	NaN	NaN	NaN	NaN	NaN	NaN	NaN	NaN	NaN	NaN	NaN	NaN	NaN	NaN	NaN	NaN	NaN	NaN	NaN	NaN	NaN	NaN	NaN	NaN	NaN	NaN	NaN	NaN	NaN	NaN	NaN	NaN	NaN
-76.2827	NaN	NaN	NaN	NaN	NaN	NaN	NaN	NaN	NaN		NaN	NaN	NaN	NaN	NaN	NaN	NaN	NaN	NaN	NaN	NaN	NaN	NaN	NaN	NaN	NaN	NaN	NaN	NaN	NaN	NaN	NaN	NaN	NaN	NaN	NaN	NaN	NaN	NaN	NaN	NaN	NaN	NaN	NaN	NaN	NaN	NaN	NaN	NaN
-76.1859	NaN	NaN	NaN	NaN	NaN	NaN	NaN	NaN	NaN		NaN	NaN	NaN	NaN	NaN	NaN	NaN	NaN	NaN	NaN	NaN	NaN	NaN	NaN	NaN	NaN	NaN	NaN	NaN	NaN	NaN	NaN	NaN	NaN	NaN	NaN	NaN	NaN	NaN	NaN	NaN	NaN	NaN	NaN	NaN	NaN	NaN	NaN	NaN
-76.0891	NaN	NaN	NaN	NaN	NaN	NaN	NaN	NaN	NaN		NaN	NaN	NaN	NaN	NaN	NaN	NaN	NaN	NaN	NaN	NaN	NaN	NaN	NaN	NaN	NaN	NaN	NaN	NaN	NaN	NaN	NaN	NaN	NaN	NaN	NaN	NaN	NaN	NaN	NaN	NaN	NaN	NaN	NaN	NaN	NaN	NaN	NaN	NaN
-75.9923	NaN	NaN	NaN	NaN	NaN	NaN	NaN	NaN	NaN		NaN	NaN	NaN	NaN	NaN	NaN	NaN	NaN	NaN	NaN	NaN	NaN	NaN	NaN	NaN	NaN	NaN	NaN	NaN	NaN	NaN	NaN	NaN	NaN	NaN	NaN	NaN	NaN	NaN	NaN	NaN	NaN	NaN	NaN	NaN	NaN	NaN	NaN	NaN
-75.8955	NaN	NaN	NaN	NaN	NaN	NaN	NaN	NaN	NaN		NaN	NaN	NaN	NaN	NaN	NaN	NaN	NaN	NaN	NaN	NaN	NaN	NaN	NaN	NaN	NaN	NaN	NaN	NaN	NaN	NaN	NaN	NaN	NaN	NaN	NaN	NaN	NaN	NaN	NaN	NaN	NaN	NaN	NaN	NaN	NaN	NaN	NaN	NaN
-75.7986	NaN	NaN	NaN	NaN	NaN	NaN	NaN	NaN	NaN		NaN	NaN	NaN	NaN	NaN	NaN	NaN	NaN	NaN	NaN	NaN	NaN	NaN	NaN	NaN	NaN	NaN	NaN	NaN	NaN	NaN	NaN	NaN	NaN	NaN	NaN	NaN	NaN	NaN	NaN	NaN	NaN	NaN	NaN	NaN	NaN	NaN	NaN	NaN
-75.7018	NaN	NaN	NaN	NaN	NaN	NaN	NaN	NaN	NaN		NaN	NaN	NaN	NaN	NaN	NaN	NaN	NaN	NaN	NaN	NaN	NaN	NaN	NaN	NaN	NaN	NaN	NaN	NaN	NaN	NaN	NaN	NaN	NaN	NaN	NaN	NaN	NaN	NaN	NaN	NaN	NaN	NaN	NaN	NaN	NaN	NaN	NaN	NaN
-75.605	NaN	NaN	NaN	NaN	NaN	NaN	NaN	NaN	NaN		NaN	NaN	NaN	NaN	NaN	NaN	NaN	NaN	NaN	NaN	NaN	NaN	NaN	NaN	NaN	NaN	NaN	NaN	NaN	NaN	NaN	NaN	NaN	NaN	NaN	NaN	NaN	NaN	NaN	NaN	NaN	NaN	NaN	NaN	NaN	NaN	NaN	NaN	NaN
-75.5082	NaN	NaN	NaN	NaN	NaN	NaN	NaN	NaN	NaN		NaN	NaN	NaN	NaN	NaN	NaN	NaN	NaN	NaN	NaN	NaN	NaN	NaN	NaN	NaN	NaN	NaN	NaN	NaN	NaN	NaN	NaN	NaN	NaN	NaN	NaN	NaN	NaN	NaN	NaN	NaN	NaN	NaN	NaN	NaN	NaN	NaN	NaN	NaN
-75.4114	NaN	NaN	NaN	NaN	NaN	NaN	NaN	NaN	NaN		NaN	NaN	NaN	NaN	NaN	NaN	NaN	NaN	NaN	NaN	NaN	NaN	NaN	NaN	NaN	NaN	NaN	NaN	NaN	NaN	NaN	NaN	NaN	NaN	NaN	NaN	NaN	NaN	NaN	NaN	NaN	NaN	NaN	NaN	NaN	NaN	NaN	NaN	NaN
-75.3146	NaN	NaN	NaN	NaN	NaN	NaN	NaN	NaN	NaN		NaN	NaN	NaN	NaN	NaN	NaN	NaN	NaN	NaN	NaN	NaN	NaN	NaN	NaN	NaN	NaN	NaN	NaN	NaN	NaN	NaN	NaN	NaN	NaN	NaN	NaN	NaN	NaN	NaN	NaN	NaN	NaN	NaN	NaN	NaN	NaN	NaN	NaN	NaN
-75.2178	NaN	NaN	NaN	NaN	NaN	NaN	NaN	NaN	NaN		NaN	NaN	NaN	NaN	NaN	NaN	NaN	NaN	NaN	NaN	NaN	NaN	NaN	NaN	NaN	NaN	NaN	NaN	NaN	NaN	NaN	NaN	NaN	NaN	NaN	NaN	NaN	NaN	NaN	NaN	NaN	NaN	NaN	NaN	NaN	NaN	NaN	NaN	NaN
-75.121	NaN	NaN	NaN	NaN	NaN	NaN	NaN	NaN	NaN		NaN	NaN	NaN	NaN	NaN	NaN	NaN	NaN	NaN	NaN	NaN	NaN	NaN	NaN	NaN	NaN	NaN	NaN	NaN	NaN	NaN	NaN	NaN	NaN	NaN	NaN	NaN	NaN	NaN	NaN	NaN	NaN	NaN	NaN	NaN	NaN	NaN	NaN	NaN
-75.0242	NaN	NaN	NaN	NaN	NaN	NaN	NaN	NaN	NaN		NaN	NaN	NaN	NaN	NaN	NaN	NaN	NaN	NaN	NaN	NaN	NaN	NaN	NaN	NaN	NaN	NaN	NaN	NaN	NaN	NaN	NaN	NaN	NaN	NaN	NaN	NaN	NaN	NaN	NaN	NaN	NaN	NaN	NaN	NaN	NaN	NaN	NaN	NaN
-74.9274	NaN	NaN	NaN	NaN	NaN	NaN	NaN	NaN	NaN		NaN	NaN	NaN	NaN	NaN	NaN	NaN	NaN	NaN	NaN	NaN	NaN	NaN	NaN	NaN	NaN	NaN	NaN	NaN	NaN	NaN	NaN	NaN	NaN	NaN	NaN	NaN	NaN	NaN	NaN	NaN	NaN	NaN	NaN	NaN	NaN	NaN	NaN	NaN
-74.8306	NaN	NaN	NaN	NaN	NaN	NaN	NaN	NaN	NaN		NaN	NaN	NaN	NaN	NaN	NaN	NaN	NaN	NaN	NaN	NaN	NaN	NaN	NaN	NaN	NaN	NaN	NaN	NaN	NaN	NaN	NaN	NaN	NaN	NaN	NaN	NaN	NaN	NaN	NaN	NaN	NaN	NaN	NaN	NaN	NaN	NaN	NaN	NaN
-74.7338	NaN	NaN	NaN	NaN	NaN	NaN	NaN	NaN	NaN		NaN	NaN	NaN	NaN	NaN	NaN	NaN	NaN	NaN	NaN	NaN	NaN	NaN	NaN	NaN	NaN	NaN	NaN	NaN	NaN	NaN	NaN	NaN	NaN	NaN	NaN	NaN	NaN	NaN	NaN	NaN	NaN	NaN	NaN	NaN	NaN	NaN	NaN	NaN
-74.637	NaN	NaN	NaN	NaN	NaN	NaN	NaN	NaN	NaN		NaN	NaN	NaN	NaN	NaN	NaN	NaN	NaN	NaN	NaN	NaN	NaN	NaN	NaN	NaN	NaN	NaN	NaN	NaN	NaN	NaN	NaN	NaN	NaN	NaN	NaN	NaN	NaN	NaN	NaN	NaN	NaN	NaN	NaN	NaN	NaN	NaN	NaN	NaN
-74.5402	NaN	NaN	NaN	NaN	NaN	NaN	NaN	NaN	NaN		NaN	NaN	NaN	NaN	NaN	NaN	NaN	NaN	NaN	NaN	NaN	NaN	NaN	NaN	NaN	NaN	NaN	NaN	NaN	NaN	NaN	NaN	NaN	NaN	NaN	NaN	NaN	NaN	NaN	NaN	NaN	NaN	NaN	NaN	NaN	NaN	NaN	NaN	NaN
-74.4434	NaN	NaN	NaN	NaN	NaN	NaN	NaN	NaN	NaN		NaN	NaN	NaN	NaN	NaN	NaN	NaN	NaN	NaN	NaN	NaN	NaN	NaN	NaN	NaN	NaN	NaN	NaN	NaN	NaN	NaN	NaN	NaN	NaN	NaN	NaN	NaN	NaN	NaN	NaN	NaN	NaN	NaN	NaN	NaN	NaN	NaN	NaN	NaN
-74.3466	NaN	NaN	NaN	NaN	NaN	NaN	NaN	NaN	NaN		NaN	NaN	NaN	NaN	NaN	NaN	NaN	NaN	NaN	NaN	NaN	NaN	NaN	NaN	NaN	NaN	NaN	NaN	NaN	NaN	NaN	NaN	NaN	NaN	NaN	NaN	NaN	NaN	NaN	NaN	NaN	NaN	NaN	NaN	NaN	NaN	NaN	NaN	NaN
-74.2498	NaN	NaN	NaN	NaN	NaN	NaN	NaN	NaN	NaN		NaN	NaN	NaN	NaN	NaN	NaN	NaN	NaN	NaN	NaN	NaN	NaN	NaN	NaN	NaN	NaN	NaN	NaN	NaN	NaN	NaN	NaN	NaN	NaN	NaN	NaN	NaN	NaN	NaN	NaN	NaN	NaN	NaN	NaN	NaN	NaN	NaN	NaN	NaN
-74.153	NaN	NaN	NaN	NaN	NaN	NaN	NaN	NaN	NaN		NaN	NaN	NaN	NaN	NaN	NaN	NaN	NaN	NaN	NaN	NaN	NaN	NaN	NaN	NaN	NaN	NaN	NaN	NaN	NaN	NaN	NaN	NaN	NaN	NaN	NaN	NaN	NaN	NaN	NaN	NaN	NaN	NaN	NaN	NaN	NaN	NaN	NaN	NaN
-74.0561	NaN	NaN	NaN	NaN	NaN	NaN	NaN	NaN	NaN		NaN	NaN	NaN	NaN	NaN	NaN	NaN	NaN	NaN	NaN	NaN	NaN	NaN	NaN	NaN	NaN	NaN	NaN	NaN	NaN	NaN	NaN	NaN	NaN	NaN	NaN	NaN	NaN	NaN	NaN	NaN	NaN	NaN	NaN	NaN	NaN	NaN	NaN	NaN
-73.9593	NaN	NaN	NaN	NaN	NaN	NaN	NaN	NaN	NaN		NaN	NaN	NaN	NaN	NaN	NaN	NaN	NaN	NaN	NaN	NaN	NaN	NaN	NaN	NaN	NaN	NaN	NaN	NaN	NaN	NaN	NaN	NaN	NaN	NaN	NaN	NaN	NaN	NaN	NaN	NaN	NaN	NaN	NaN	NaN	NaN	NaN	NaN	NaN
-73.8625	NaN	NaN	NaN	NaN	NaN	NaN	NaN	NaN	NaN		NaN	NaN	NaN	NaN	NaN	NaN	NaN	NaN	NaN	NaN	NaN	NaN	NaN	NaN	NaN	NaN	NaN	NaN	NaN	NaN	NaN	NaN	NaN	NaN	NaN	NaN	NaN	NaN	NaN	NaN	NaN	NaN	NaN	NaN	NaN	NaN	NaN	NaN	NaN
-73.7657	NaN	NaN	NaN	NaN	NaN	NaN	NaN	NaN	NaN		NaN	NaN	NaN	NaN	NaN	NaN	NaN	NaN	NaN	NaN	NaN	NaN	NaN	NaN	NaN	NaN	NaN	NaN	NaN	NaN	NaN	NaN	NaN	NaN	NaN	NaN	NaN	NaN	NaN	NaN	NaN	NaN	NaN	NaN	NaN	NaN	NaN	NaN	NaN
-73.6689	NaN	NaN	NaN	NaN	NaN	NaN	NaN	NaN	NaN		NaN	NaN	NaN	NaN	NaN	NaN	NaN	NaN	NaN	NaN	NaN	NaN	NaN	NaN	NaN	NaN	NaN	NaN	NaN	NaN	NaN	NaN	NaN	NaN	NaN	NaN	NaN	NaN	NaN	NaN	NaN	NaN	NaN	NaN	NaN	NaN	NaN	NaN	NaN
-73.5721	NaN	NaN	NaN	NaN	NaN	NaN	NaN	NaN	NaN		NaN	NaN	NaN	NaN	NaN	NaN	NaN	NaN	NaN	NaN	NaN	NaN	NaN	NaN	NaN	NaN	NaN	NaN	NaN	NaN	NaN	NaN	NaN	NaN	NaN	NaN	NaN	NaN	NaN	NaN	NaN	NaN	NaN	NaN	NaN	NaN	NaN	NaN	NaN
-73.4753	NaN	NaN	NaN	NaN	NaN	NaN	NaN	NaN	NaN		NaN	NaN	NaN	NaN	NaN	NaN	NaN	NaN	NaN	NaN	NaN	NaN	NaN	NaN	NaN	NaN	NaN	NaN	NaN	NaN	NaN	NaN	NaN	NaN	NaN	NaN	NaN	NaN	NaN	NaN	NaN	NaN	NaN	NaN	NaN	NaN	NaN	NaN	NaN
-73.3785	NaN	NaN	NaN	NaN	NaN	NaN	NaN	NaN	NaN		NaN	NaN	NaN	NaN	NaN	NaN	NaN	NaN	NaN	NaN	NaN	NaN	NaN	NaN	NaN	NaN	NaN	NaN	NaN	NaN	NaN	NaN	NaN	NaN	NaN	NaN	NaN	NaN	NaN	NaN	NaN	NaN	NaN	NaN	NaN	NaN	NaN	NaN	NaN
-73.2817	NaN	NaN	NaN	NaN	NaN	NaN	NaN	NaN	NaN		NaN	NaN	NaN	NaN	NaN	NaN	NaN	NaN	NaN	NaN	NaN	NaN	NaN	NaN	NaN	NaN	NaN	NaN	NaN	NaN	NaN	NaN	NaN	NaN	NaN	NaN	NaN	NaN	NaN	NaN	NaN	NaN	NaN	NaN	NaN	NaN	NaN	NaN	NaN
-73.1849	NaN	NaN	NaN	NaN	NaN	NaN	NaN	NaN	NaN		NaN	NaN	NaN	NaN	NaN	NaN	NaN	NaN	NaN	NaN	NaN	NaN	NaN	NaN	NaN	NaN	NaN	NaN	NaN	NaN	NaN	NaN	NaN	NaN	NaN	NaN	NaN	NaN	NaN	NaN	NaN	NaN	NaN	NaN	NaN	NaN	NaN	NaN	NaN
-73.0881	NaN	NaN	NaN	NaN	NaN	NaN	NaN	NaN	NaN		NaN	NaN	NaN	NaN	NaN	NaN	NaN	NaN	NaN	NaN	NaN	NaN	NaN	NaN	NaN	NaN	NaN	NaN	NaN	NaN	NaN	NaN	NaN	NaN	NaN	NaN	NaN	NaN	NaN	NaN	NaN	NaN	NaN	NaN	NaN	NaN	NaN	NaN	NaN
-72.9913	NaN	NaN	NaN	NaN	NaN	NaN	NaN	NaN	NaN		NaN	NaN	NaN	NaN	NaN	NaN	NaN	NaN	NaN	NaN	NaN	NaN	NaN	NaN	NaN	NaN	NaN	NaN	NaN	NaN	NaN	NaN	NaN	NaN	NaN	NaN	NaN	NaN	NaN	NaN	NaN	NaN	NaN	NaN	NaN	NaN	NaN	NaN	NaN
-72.8945	NaN	NaN	NaN	NaN	NaN	NaN	NaN	NaN	NaN		NaN	NaN	NaN	NaN	NaN	NaN	NaN	NaN	NaN	NaN	NaN	NaN	NaN	NaN	NaN	NaN	NaN	NaN	NaN	NaN	NaN	NaN	NaN	NaN	NaN	NaN	NaN	NaN	NaN	NaN	NaN	NaN	NaN	NaN	NaN	NaN	NaN	NaN	NaN
-72.7977	NaN	NaN	NaN	NaN	NaN	NaN	NaN	NaN	NaN		NaN	NaN	NaN	NaN	NaN	NaN	NaN	NaN	NaN	NaN	NaN	NaN	NaN	NaN	NaN	NaN	NaN	NaN	NaN	NaN	NaN	NaN	NaN	NaN	NaN	NaN	NaN	NaN	NaN	NaN	NaN	NaN	NaN	NaN	NaN	NaN	NaN	NaN	NaN
-72.7009	NaN	NaN	NaN	NaN	NaN	NaN	NaN	NaN	NaN		NaN	NaN	NaN	NaN	NaN	NaN	NaN	NaN	NaN	NaN	NaN	NaN	NaN	NaN	NaN	NaN	NaN	NaN	NaN	NaN	NaN	NaN	NaN	NaN	NaN	NaN	NaN	NaN	NaN	NaN	NaN	NaN	NaN	NaN	NaN	NaN	NaN	NaN	NaN
-72.6041	NaN	NaN	NaN	NaN	NaN	NaN	NaN	NaN	NaN		NaN	NaN	NaN	NaN	NaN	NaN	NaN	NaN	NaN	NaN	NaN	NaN	NaN	NaN	NaN	NaN	NaN	NaN	NaN	NaN	NaN	NaN	NaN	NaN	NaN	NaN	NaN	NaN	NaN	NaN	NaN	NaN	NaN	NaN	NaN	NaN	NaN	NaN	NaN
-72.5073	NaN	NaN	NaN	NaN	NaN	NaN	NaN	NaN	NaN		NaN	NaN	NaN	NaN	NaN	NaN	NaN	NaN	NaN	NaN	NaN	NaN	NaN	NaN	NaN	NaN	NaN	NaN	NaN	NaN	NaN	NaN	NaN	NaN	NaN	NaN	NaN	NaN	NaN	NaN	NaN	NaN	NaN	NaN	NaN	NaN	NaN	NaN	NaN
-72.4105	NaN	NaN	NaN	NaN	NaN	NaN	NaN	NaN	NaN		NaN	NaN	NaN	NaN	NaN	NaN	NaN	NaN	NaN	NaN	NaN	NaN	NaN	NaN	NaN	NaN	NaN	NaN	NaN	NaN	NaN	NaN	NaN	NaN	NaN	NaN	NaN	NaN	NaN	NaN	NaN	NaN	NaN	NaN	NaN	NaN	NaN	NaN	NaN
-72.3136	NaN	NaN	NaN	NaN	NaN	NaN	NaN	NaN	NaN		NaN	NaN	NaN	NaN	NaN	NaN	NaN	NaN	NaN	NaN	NaN	NaN	NaN	NaN	NaN	NaN	NaN	NaN	NaN	NaN	NaN	NaN	NaN	NaN	NaN	NaN	NaN	NaN	NaN	NaN	NaN	NaN	NaN	NaN	NaN	NaN	NaN	NaN	NaN
-72.2168	NaN	NaN	NaN	NaN	NaN	NaN	NaN	NaN	NaN		NaN	NaN	NaN	NaN	NaN	NaN	NaN	NaN	NaN	NaN	NaN	NaN	NaN	NaN	NaN	NaN	NaN	NaN	NaN	NaN	NaN	NaN	NaN	NaN	NaN	NaN	NaN	NaN	NaN	NaN	NaN	NaN	NaN	NaN	NaN	NaN	NaN	NaN	NaN
-72.12	NaN	NaN	NaN	NaN	NaN	NaN	NaN	NaN	NaN		NaN	NaN	NaN	NaN	NaN	NaN	NaN	NaN	NaN	NaN	NaN	NaN	NaN	NaN	NaN	NaN	NaN	NaN	NaN	NaN	NaN	NaN	NaN	NaN	NaN	NaN	NaN	NaN	NaN	NaN	NaN	NaN	NaN	NaN	NaN	NaN	NaN	NaN	NaN
-72.0232	NaN	NaN	NaN	NaN	NaN	NaN	NaN	NaN	NaN		NaN	NaN	NaN	NaN	NaN	NaN	NaN	NaN	NaN	NaN	NaN	NaN	NaN	NaN	NaN	NaN	NaN	NaN	NaN	NaN	NaN	NaN	NaN	NaN	NaN	NaN	NaN	NaN	NaN	NaN	NaN	NaN	NaN	NaN	NaN	NaN	NaN	NaN	NaN
-71.9264	NaN	NaN	NaN	NaN	NaN	NaN	NaN	NaN	NaN		NaN	NaN	NaN	NaN	NaN	NaN	NaN	NaN	NaN	NaN	NaN	NaN	NaN	NaN	NaN	NaN	NaN	NaN	NaN	NaN	NaN	NaN	NaN	NaN	NaN	NaN	NaN	NaN	NaN	NaN	NaN	NaN	NaN	NaN	NaN	NaN	NaN	NaN	NaN
-71.8296	NaN	NaN	NaN	NaN	NaN	NaN	NaN	NaN	NaN		NaN	NaN	NaN	NaN	NaN	NaN	NaN	NaN	NaN	NaN	NaN	NaN	NaN	NaN	NaN	NaN	NaN	NaN	NaN	NaN	NaN	NaN	NaN	NaN	NaN	NaN	NaN	NaN	NaN	NaN	NaN	NaN	NaN	NaN	NaN	NaN	NaN	NaN	NaN
-71.7328	NaN	NaN	NaN	NaN	NaN	NaN	NaN	NaN	NaN		NaN	NaN	NaN	NaN	NaN	NaN	NaN	NaN	NaN	NaN	NaN	NaN	NaN	NaN	NaN	NaN	NaN	NaN	NaN	NaN	NaN	NaN	NaN	NaN	NaN	NaN	NaN	NaN	NaN	NaN	NaN	NaN	NaN	NaN	NaN	NaN	NaN	NaN	NaN
-71.636	NaN	NaN	NaN	NaN	NaN	NaN	NaN	NaN	NaN		NaN	NaN	NaN	NaN	NaN	NaN	NaN	NaN	NaN	NaN	NaN	NaN	NaN	NaN	NaN	NaN	NaN	NaN	NaN	NaN	NaN	NaN	NaN	NaN	NaN	NaN	NaN	NaN	NaN	NaN	NaN	NaN	NaN	NaN	NaN	NaN	NaN	NaN	NaN
-71.5392	NaN	NaN	NaN	NaN	NaN	NaN	NaN	NaN	NaN		NaN	NaN	NaN	NaN	NaN	NaN	NaN	NaN	NaN	NaN	NaN	NaN	NaN	NaN	NaN	NaN	NaN	NaN	NaN	NaN	NaN	NaN	NaN	NaN	NaN	NaN	NaN	NaN	NaN	NaN	NaN	NaN	NaN	NaN	NaN	NaN	NaN	NaN	NaN
-71.4424	NaN	NaN	NaN	NaN	NaN	NaN	NaN	NaN	NaN		NaN	NaN	NaN	NaN	NaN	NaN	NaN	NaN	NaN	NaN	NaN	NaN	NaN	NaN	NaN	NaN	NaN	NaN	NaN	NaN	NaN	NaN	NaN	NaN	NaN	NaN	NaN	NaN	NaN	NaN	NaN	NaN	NaN	NaN	NaN	NaN	NaN	NaN	NaN
-71.3456	NaN	NaN	NaN	NaN	NaN	NaN	NaN	NaN	NaN		NaN	NaN	NaN	NaN	NaN	NaN	NaN	NaN	NaN	NaN	NaN	NaN	NaN	NaN	NaN	NaN	NaN	NaN	NaN	NaN	NaN	NaN	NaN	NaN	NaN	NaN	NaN	NaN	NaN	NaN	NaN	NaN	NaN	NaN	NaN	NaN	NaN	NaN	NaN
-71.2488	NaN	NaN	NaN	NaN	NaN	NaN	NaN	NaN	NaN		NaN	NaN	NaN	NaN	NaN	NaN	NaN	NaN	NaN	NaN	NaN	NaN	NaN	NaN	NaN	NaN	NaN	NaN	NaN	NaN	NaN	NaN	NaN	NaN	NaN	NaN	NaN	NaN	NaN	NaN	NaN	NaN	NaN	NaN	NaN	NaN	NaN	NaN	NaN
-71.152	NaN	NaN	NaN	NaN	NaN	NaN	NaN	NaN	NaN		NaN	NaN	NaN	NaN	NaN	NaN	NaN	NaN	NaN	NaN	NaN	NaN	NaN	NaN	NaN	NaN	NaN	NaN	NaN	NaN	NaN	NaN	NaN	NaN	NaN	NaN	NaN	NaN	NaN	NaN	NaN	NaN	NaN	NaN	NaN	NaN	NaN	NaN	NaN
-71.0552	NaN	NaN	NaN	NaN	NaN	NaN	NaN	NaN	NaN		NaN	NaN	NaN	NaN	NaN	NaN	NaN	NaN	NaN	NaN	NaN	NaN	NaN	NaN	NaN	NaN	NaN	NaN	NaN	NaN	NaN	NaN	NaN	NaN	NaN	NaN	NaN	NaN	NaN	NaN	NaN	NaN	NaN	NaN	NaN	NaN	NaN	NaN	NaN
-70.9584	NaN	NaN	NaN	NaN	NaN	NaN	NaN	NaN	NaN		NaN	NaN	NaN	NaN	NaN	NaN	NaN	NaN	NaN	NaN	NaN	NaN	NaN	NaN	NaN	NaN	NaN	NaN	NaN	NaN	NaN	NaN	NaN	NaN	NaN	NaN	NaN	NaN	NaN	NaN	NaN	NaN	NaN	NaN	NaN	NaN	NaN	NaN	NaN
-70.8616	NaN	NaN	NaN	NaN	NaN	NaN	NaN	NaN	NaN		NaN	NaN	NaN	NaN	NaN	NaN	NaN	NaN	NaN	NaN	NaN	NaN	NaN	NaN	NaN	NaN	NaN	NaN	NaN	NaN	NaN	NaN	NaN	NaN	NaN	NaN	NaN	NaN	NaN	NaN	NaN	NaN	NaN	NaN	NaN	NaN	NaN	NaN	NaN
-70.7648	NaN	NaN	NaN	NaN	NaN	NaN	NaN	NaN	NaN		NaN	NaN	NaN	NaN	NaN	NaN	NaN	NaN	NaN	NaN	NaN	NaN	NaN	NaN	NaN	NaN	NaN	NaN	NaN	NaN	NaN	NaN	NaN	NaN	NaN	NaN	NaN	NaN	NaN	NaN	NaN	NaN	NaN	NaN	NaN	NaN	NaN	NaN	NaN
-70.668	NaN	NaN	NaN	NaN	NaN	NaN	NaN	NaN	NaN		NaN	NaN	NaN	NaN	NaN	NaN	NaN	NaN	NaN	NaN	NaN	NaN	NaN	NaN	NaN	NaN	NaN	NaN	NaN	NaN	NaN	NaN	NaN	NaN	NaN	NaN	NaN	NaN	NaN	NaN	NaN	NaN	NaN	NaN	NaN	NaN	NaN	NaN	NaN
-70.5712	NaN	NaN	NaN	NaN	NaN	NaN	NaN	NaN	NaN		NaN	NaN	NaN	NaN	NaN	NaN	NaN	NaN	NaN	NaN	NaN	NaN	NaN	NaN	NaN	NaN	NaN	NaN	NaN	NaN	NaN	NaN	NaN	NaN	NaN	NaN	NaN	NaN	NaN	NaN	NaN	NaN	NaN	NaN	NaN	NaN	NaN	NaN	NaN
-70.4743	NaN	NaN	NaN	NaN	NaN	NaN	NaN	NaN	NaN		NaN	NaN	NaN	NaN	NaN	NaN	NaN	NaN	NaN	NaN	NaN	NaN	NaN	NaN	NaN	NaN	NaN	NaN	NaN	NaN	NaN	NaN	NaN	NaN	NaN	NaN	NaN	NaN	NaN	NaN	NaN	NaN	NaN	NaN	NaN	NaN	NaN	NaN	NaN
-70.3775	NaN	NaN	NaN	NaN	NaN	NaN	NaN	NaN	NaN		NaN	NaN	NaN	NaN	NaN	NaN	NaN	NaN	NaN	NaN	NaN	NaN	NaN	NaN	NaN	NaN	NaN	NaN	NaN	NaN	NaN	NaN	NaN	NaN	NaN	NaN	NaN	NaN	NaN	NaN	NaN	NaN	NaN	NaN	NaN	NaN	NaN	NaN	NaN
-70.2807	NaN	NaN	NaN	NaN	NaN	NaN	NaN	NaN	NaN		NaN	NaN	NaN	NaN	NaN	NaN	NaN	NaN	NaN	NaN	NaN	NaN	NaN	NaN	NaN	NaN	NaN	NaN	NaN	NaN	NaN	NaN	NaN	NaN	NaN	NaN	NaN	NaN	NaN	NaN	NaN	NaN	NaN	NaN	NaN	NaN	NaN	NaN	NaN
-70.1839	NaN	NaN	NaN	NaN	NaN	NaN	NaN	NaN	NaN		NaN	NaN	NaN	NaN	NaN	NaN	NaN	NaN	NaN	NaN	NaN	NaN	NaN	NaN	NaN	NaN	NaN	NaN	NaN	NaN	NaN	NaN	NaN	NaN	NaN	NaN	NaN	NaN	NaN	NaN	NaN	NaN	NaN	NaN	NaN	NaN	NaN	NaN	NaN
-70.0871	NaN	NaN	NaN	NaN	NaN	NaN	NaN	NaN	NaN		NaN	NaN	NaN	NaN	NaN	NaN	NaN	NaN	NaN	NaN	NaN	NaN	NaN	NaN	NaN	NaN	NaN	NaN	NaN	NaN	NaN	NaN	NaN	NaN	NaN	NaN	NaN	NaN	NaN	NaN	NaN	NaN	NaN	NaN	NaN	NaN	NaN	NaN	NaN
-69.9903	NaN	NaN	NaN	NaN	NaN	NaN	NaN	NaN	NaN		NaN	NaN	NaN	NaN	NaN	NaN	NaN	NaN	NaN	NaN	NaN	NaN	NaN	NaN	NaN	NaN	NaN	NaN	NaN	NaN	NaN	NaN	NaN	NaN	NaN	NaN	NaN	NaN	NaN	NaN	NaN	NaN	NaN	NaN	NaN	NaN	NaN	NaN	NaN
-69.8935	NaN	NaN	NaN	NaN	NaN	NaN	NaN	NaN	NaN		NaN	NaN	NaN	NaN	NaN	NaN	NaN	NaN	NaN	NaN	NaN	NaN	NaN	NaN	NaN	NaN	NaN	NaN	NaN	NaN	NaN	NaN	NaN	NaN	NaN	NaN	NaN	NaN	NaN	NaN	NaN	NaN	NaN	NaN	NaN	NaN	NaN	NaN	NaN
-69.7967	NaN	NaN	NaN	NaN	NaN	NaN	NaN	NaN	NaN		NaN	NaN	NaN	NaN	NaN	NaN	NaN	NaN	NaN	NaN	NaN	NaN	NaN	NaN	NaN	NaN	NaN	NaN	NaN	NaN	NaN	NaN	NaN	NaN	NaN	NaN	NaN	NaN	NaN	NaN	NaN	NaN	NaN	NaN	NaN	NaN	NaN	NaN	NaN
-69.6999	NaN	NaN	NaN	NaN	NaN	NaN	NaN	NaN	NaN		NaN	NaN	NaN	NaN	NaN	NaN	NaN	NaN	NaN	NaN	NaN	NaN	NaN	NaN	NaN	NaN	NaN	NaN	NaN	NaN	NaN	NaN	NaN	NaN	NaN	NaN	NaN	NaN	NaN	NaN	NaN	NaN	NaN	NaN	NaN	NaN	NaN	NaN	NaN
-69.6031	NaN	NaN	NaN	NaN	NaN	NaN	NaN	NaN	NaN		NaN	NaN	NaN	NaN	NaN	NaN	NaN	NaN	NaN	NaN	NaN	NaN	NaN	NaN	NaN	NaN	NaN	NaN	NaN	NaN	NaN	NaN	NaN	NaN	NaN	NaN	NaN	NaN	NaN	NaN	NaN	NaN	NaN	NaN	NaN	NaN	NaN	NaN	NaN
-69.5063	NaN	NaN	NaN	NaN	NaN	NaN	NaN	NaN	NaN		NaN	NaN	NaN	NaN	NaN	NaN	NaN	NaN	NaN	NaN	NaN	NaN	NaN	NaN	NaN	NaN	NaN	NaN	NaN	NaN	NaN	NaN	NaN	NaN	NaN	NaN	NaN	NaN	NaN	NaN	NaN	NaN	NaN	NaN	NaN	NaN	NaN	NaN	NaN
-69.4095	NaN	NaN	NaN	NaN	NaN	NaN	NaN	NaN	NaN		NaN	NaN	NaN	NaN	NaN	NaN	NaN	NaN	NaN	NaN	NaN	NaN	NaN	NaN	NaN	NaN	NaN	NaN	NaN	NaN	NaN	NaN	NaN	NaN	NaN	NaN	NaN	NaN	NaN	NaN	NaN	NaN	NaN	NaN	NaN	NaN	NaN	NaN	NaN
-69.3127	NaN	NaN	NaN	NaN	NaN	NaN	NaN	NaN	NaN		NaN	NaN	NaN	NaN	NaN	NaN	NaN	NaN	NaN	NaN	NaN	NaN	NaN	NaN	NaN	NaN	NaN	NaN	NaN	NaN	NaN	NaN	NaN	NaN	NaN	NaN	NaN	NaN	NaN	NaN	NaN	NaN	NaN	NaN	NaN	NaN	NaN	NaN	NaN
-69.2159	NaN	NaN	NaN	NaN	NaN	NaN	NaN	NaN	NaN		NaN	NaN	NaN	NaN	NaN	NaN	NaN	NaN	NaN	NaN	NaN	NaN	NaN	NaN	NaN	NaN	NaN	NaN	NaN	NaN	NaN	NaN	NaN	NaN	NaN	NaN	NaN	NaN	NaN	NaN	NaN	NaN	NaN	NaN	NaN	NaN	NaN	NaN	NaN
-69.1191	NaN	NaN	NaN	NaN	NaN	NaN	NaN	NaN	NaN		NaN	NaN	NaN	NaN	NaN	NaN	NaN	NaN	NaN	NaN	NaN	NaN	NaN	NaN	NaN	NaN	NaN	NaN	NaN	NaN	NaN	NaN	NaN	NaN	NaN	NaN	NaN	NaN	NaN	NaN	NaN	NaN	NaN	NaN	NaN	NaN	NaN	NaN	NaN
-69.0223	NaN	NaN	NaN	NaN	NaN	NaN	NaN	NaN	NaN		NaN	NaN	NaN	NaN	NaN	NaN	NaN	NaN	NaN	NaN	NaN	NaN	NaN	NaN	NaN	NaN	NaN	NaN	NaN	NaN	NaN	NaN	NaN	NaN	NaN	NaN	NaN	NaN	NaN	NaN	NaN	NaN	NaN	NaN	NaN	NaN	NaN	NaN	NaN
-68.9255	NaN	NaN	NaN	NaN	NaN	NaN	NaN	NaN	NaN		NaN	NaN	NaN	NaN	NaN	NaN	NaN	NaN	NaN	NaN	NaN	NaN	NaN	NaN	NaN	NaN	NaN	NaN	NaN	NaN	NaN	NaN	NaN	NaN	NaN	NaN	NaN	NaN	NaN	NaN	NaN	NaN	NaN	NaN	NaN	NaN	NaN	NaN	NaN
-68.8287	NaN	NaN	NaN	NaN	NaN	NaN	NaN	NaN	NaN		NaN	NaN	NaN	NaN	NaN	NaN	NaN	NaN	NaN	NaN	NaN	NaN	NaN	NaN	NaN	NaN	NaN	NaN	NaN	NaN	NaN	NaN	NaN	NaN	NaN	NaN	NaN	NaN	NaN	NaN	NaN	NaN	NaN	NaN	NaN	NaN	NaN	NaN	NaN
-68.7318	NaN	NaN	NaN	NaN	NaN	NaN	NaN	NaN	NaN		NaN	NaN	NaN	NaN	NaN	NaN	NaN	NaN	NaN	NaN	NaN	NaN	NaN	NaN	NaN	NaN	NaN	NaN	NaN	NaN	NaN	NaN	NaN	NaN	NaN	NaN	NaN	NaN	NaN	NaN	NaN	NaN	NaN	NaN	NaN	NaN	NaN	NaN	NaN
-68.635	NaN	NaN	NaN	NaN	NaN	NaN	NaN	NaN	NaN		NaN	NaN	NaN	NaN	NaN	NaN	NaN	NaN	NaN	NaN	NaN	NaN	NaN	NaN	NaN	NaN	NaN	NaN	NaN	NaN	NaN	NaN	NaN	NaN	NaN	NaN	NaN	NaN	NaN	NaN	NaN	NaN	NaN	NaN	NaN	NaN	NaN	NaN	NaN
-68.5382	NaN	NaN	NaN	NaN	NaN	NaN	NaN	NaN	NaN		NaN	NaN	NaN	NaN	NaN	NaN	NaN	NaN	NaN	NaN	NaN	NaN	NaN	NaN	NaN	NaN	NaN	NaN	NaN	NaN	NaN	NaN	NaN	NaN	NaN	NaN	NaN	NaN	NaN	NaN	NaN	NaN	NaN	NaN	NaN	NaN	NaN	NaN	NaN
-68.4414	NaN	NaN	NaN	NaN	NaN	NaN	NaN	NaN	NaN		NaN	NaN	NaN	NaN	NaN	NaN	NaN	NaN	NaN	NaN	NaN	NaN	NaN	NaN	NaN	NaN	NaN	NaN	NaN	NaN	NaN	NaN	NaN	NaN	NaN	NaN	NaN	NaN	NaN	NaN	NaN	NaN	NaN	NaN	NaN	NaN	NaN	NaN	NaN
-68.3446	NaN	NaN	NaN	NaN	NaN	NaN	NaN	NaN	NaN		NaN	NaN	NaN	NaN	NaN	NaN	NaN	NaN	NaN	NaN	NaN	NaN	NaN	NaN	NaN	NaN	NaN	NaN	NaN	NaN	NaN	NaN	NaN	NaN	NaN	NaN	NaN	NaN	NaN	NaN	NaN	NaN	NaN	NaN	NaN	NaN	NaN	NaN	NaN
-68.2478	NaN	NaN	NaN	NaN	NaN	NaN	NaN	NaN	NaN		NaN	NaN	NaN	NaN	NaN	NaN	NaN	NaN	NaN	NaN	NaN	NaN	NaN	NaN	NaN	NaN	NaN	NaN	NaN	NaN	NaN	NaN	NaN	NaN	NaN	NaN	NaN	NaN	NaN	NaN	NaN	NaN	NaN	NaN	NaN	NaN	NaN	NaN	NaN
-68.151	NaN	NaN	NaN	NaN	NaN	NaN	NaN	NaN	NaN		NaN	NaN	NaN	NaN	NaN	NaN	NaN	NaN	NaN	NaN	NaN	NaN	NaN	NaN	NaN	NaN	NaN	NaN	NaN	NaN	NaN	NaN	NaN	NaN	NaN	NaN	NaN	NaN	NaN	NaN	NaN	NaN	NaN	NaN	NaN	NaN	NaN	NaN	NaN
-68.0542	NaN	NaN	NaN	NaN	NaN	NaN	NaN	NaN	NaN		NaN	NaN	NaN	NaN	NaN	NaN	NaN	NaN	NaN	NaN	NaN	NaN	NaN	NaN	NaN	NaN	NaN	NaN	NaN	NaN	NaN	NaN	NaN	NaN	NaN	NaN	NaN	NaN	NaN	NaN	NaN	NaN	NaN	NaN	NaN	NaN	NaN	NaN	NaN
-67.9574	NaN	NaN	NaN	NaN	NaN	NaN	NaN	NaN	NaN		NaN	NaN	NaN	NaN	NaN	NaN	NaN	NaN	NaN	NaN	NaN	NaN	NaN	NaN	NaN	NaN	NaN	NaN	NaN	NaN	NaN	NaN	NaN	NaN	NaN	NaN	NaN	NaN	NaN	NaN	NaN	NaN	NaN	NaN	NaN	NaN	NaN	NaN	NaN
-67.8606	NaN	NaN	NaN	NaN	NaN	NaN	NaN	NaN	NaN		NaN	NaN	NaN	NaN	NaN	NaN	NaN	NaN	NaN	NaN	NaN	NaN	NaN	NaN	NaN	NaN	NaN	NaN	NaN	NaN	NaN	NaN	NaN	NaN	NaN	NaN	NaN	NaN	NaN	NaN	NaN	NaN	NaN	NaN	NaN	NaN	NaN	NaN	NaN
-67.7638	NaN	NaN	NaN	NaN	NaN	NaN	NaN	NaN	NaN		NaN	NaN	NaN	NaN	NaN	NaN	NaN	NaN	NaN	NaN	NaN	NaN	NaN	NaN	NaN	NaN	NaN	NaN	NaN	NaN	NaN	NaN	NaN	NaN	NaN	NaN	NaN	NaN	NaN	NaN	NaN	NaN	NaN	NaN	NaN	NaN	NaN	NaN	NaN
-67.667	NaN	NaN	NaN	NaN	NaN	NaN	NaN	NaN	NaN		NaN	NaN	NaN	NaN	NaN	NaN	NaN	NaN	NaN	NaN	NaN	NaN	NaN	NaN	NaN	NaN	NaN	NaN	NaN	NaN	NaN	NaN	NaN	NaN	NaN	NaN	NaN	NaN	NaN	NaN	NaN	NaN	NaN	NaN	NaN	NaN	NaN	NaN	NaN
-67.5702	NaN	NaN	NaN	NaN	NaN	NaN	NaN	NaN	NaN		NaN	NaN	NaN	NaN	NaN	NaN	NaN	NaN	NaN	NaN	NaN	NaN	NaN	NaN	NaN	NaN	NaN	NaN	NaN	NaN	NaN	NaN	NaN	NaN	NaN	NaN	NaN	NaN	NaN	NaN	NaN	NaN	NaN	NaN	NaN	NaN	NaN	NaN	NaN
-67.4734	NaN	NaN	NaN	NaN	NaN	NaN	NaN	NaN	NaN		NaN	NaN	NaN	NaN	NaN	NaN	NaN	NaN	NaN	NaN	NaN	NaN	NaN	NaN	NaN	NaN	NaN	NaN	NaN	NaN	NaN	NaN	NaN	NaN	NaN	NaN	NaN	NaN	NaN	NaN	NaN	NaN	NaN	NaN	NaN	NaN	NaN	NaN	NaN
-67.3766	NaN	NaN	NaN	NaN	NaN	NaN	NaN	NaN	NaN		NaN	NaN	NaN	NaN	NaN	NaN	NaN	NaN	NaN	NaN	NaN	NaN	NaN	NaN	NaN	NaN	NaN	NaN	NaN	NaN	NaN	NaN	NaN	NaN	NaN	NaN	NaN	NaN	NaN	NaN	NaN	NaN	NaN	NaN	NaN	NaN	NaN	NaN	NaN
-67.2798	NaN	NaN	NaN	NaN	NaN	NaN	NaN	NaN	NaN		NaN	NaN	NaN	NaN	NaN	NaN	NaN	NaN	NaN	NaN	NaN	NaN	NaN	NaN	NaN	NaN	NaN	NaN	NaN	NaN	NaN	NaN	NaN	NaN	NaN	NaN	NaN	NaN	NaN	NaN	NaN	NaN	NaN	NaN	NaN	NaN	NaN	NaN	NaN
-67.183	NaN	NaN	NaN	NaN	NaN	NaN	NaN	NaN	NaN		NaN	NaN	NaN	NaN	NaN	NaN	NaN	NaN	NaN	NaN	NaN	NaN	NaN	NaN	NaN	NaN	NaN	NaN	NaN	NaN	NaN	NaN	NaN	NaN	NaN	NaN	NaN	NaN	NaN	NaN	NaN	NaN	NaN	NaN	NaN	NaN	NaN	NaN	NaN
-67.0862	NaN	NaN	NaN	NaN	NaN	NaN	NaN	NaN	NaN		NaN	NaN	NaN	NaN	NaN	NaN	NaN	NaN	NaN	NaN	NaN	NaN	NaN	NaN	NaN	NaN	NaN	NaN	NaN	NaN	NaN	NaN	NaN	NaN	NaN	NaN	NaN	NaN	NaN	NaN	NaN	NaN	NaN	NaN	NaN	NaN	NaN	NaN	NaN
-66.9894	NaN	NaN	NaN	NaN	NaN	NaN	NaN	NaN	NaN		NaN	NaN	NaN	NaN	NaN	NaN	NaN	NaN	NaN	NaN	NaN	NaN	NaN	NaN	NaN	NaN	NaN	NaN	NaN	NaN	NaN	NaN	NaN	NaN	NaN	NaN	NaN	NaN	NaN	NaN	NaN	NaN	NaN	NaN	NaN	NaN	NaN	NaN	NaN
-66.8925	NaN	NaN	NaN	NaN	NaN	NaN	NaN	NaN	NaN		NaN	NaN	NaN	NaN	NaN	NaN	NaN	NaN	NaN	NaN	NaN	NaN	NaN	NaN	NaN	NaN	NaN	NaN	NaN	NaN	NaN	NaN	NaN	NaN	NaN	NaN	NaN	NaN	NaN	NaN	NaN	NaN	NaN	NaN	NaN	NaN	NaN	NaN	NaN
-66.7957	NaN	NaN	NaN	NaN	NaN	NaN	NaN	NaN	NaN		NaN	NaN	NaN	NaN	NaN	NaN	NaN	NaN	NaN	NaN	NaN	NaN	NaN	NaN	NaN	NaN	NaN	NaN	NaN	NaN	NaN	NaN	NaN	NaN	NaN	NaN	NaN	NaN	NaN	NaN	NaN	NaN	NaN	NaN	NaN	NaN	NaN	NaN	NaN
-66.6989	NaN	NaN	NaN	NaN	NaN	NaN	NaN	NaN	NaN		NaN	NaN	NaN	NaN	NaN	NaN	NaN	NaN	NaN	NaN	NaN	NaN	NaN	NaN	NaN	NaN	NaN	NaN	NaN	NaN	NaN	NaN	NaN	NaN	NaN	NaN	NaN	NaN	NaN	NaN	NaN	NaN	NaN	NaN	NaN	NaN	NaN	NaN	NaN
-66.6021	NaN	NaN	NaN	NaN	NaN	NaN	NaN	NaN	NaN		NaN	NaN	NaN	NaN	NaN	NaN	NaN	NaN	NaN	NaN	NaN	NaN	NaN	NaN	NaN	NaN	NaN	NaN	NaN	NaN	NaN	NaN	NaN	NaN	NaN	NaN	NaN	NaN	NaN	NaN	NaN	NaN	NaN	NaN	NaN	NaN	NaN	NaN	NaN
-66.5053	NaN	NaN	NaN	NaN	NaN	NaN	NaN	NaN	NaN		NaN	NaN	NaN	NaN	NaN	NaN	NaN	NaN	NaN	NaN	NaN	NaN	NaN	NaN	NaN	NaN	NaN	NaN	NaN	NaN	NaN	NaN	NaN	NaN	NaN	NaN	NaN	NaN	NaN	NaN	NaN	NaN	NaN	NaN	NaN	NaN	NaN	NaN	NaN
-66.4085	NaN	NaN	NaN	NaN	NaN	NaN	NaN	NaN	NaN		NaN	NaN	NaN	NaN	NaN	NaN	NaN	NaN	NaN	NaN	NaN	NaN	NaN	NaN	NaN	NaN	NaN	NaN	NaN	NaN	NaN	NaN	NaN	NaN	NaN	NaN	NaN	NaN	NaN	NaN	NaN	NaN	NaN	NaN	NaN	NaN	NaN	NaN	NaN
-66.3117	NaN	NaN	NaN	NaN	NaN	NaN	NaN	NaN	NaN		NaN	NaN	NaN	NaN	NaN	NaN	NaN	NaN	NaN	NaN	NaN	NaN	NaN	NaN	NaN	NaN	NaN	NaN	NaN	NaN	NaN	NaN	NaN	NaN	NaN	NaN	NaN	NaN	NaN	NaN	NaN	NaN	NaN	NaN	NaN	NaN	NaN	NaN	NaN
-66.2149	NaN	NaN	NaN	NaN	NaN	NaN	NaN	NaN	NaN		NaN	NaN	NaN	NaN	NaN	NaN	NaN	NaN	NaN	NaN	NaN	NaN	NaN	NaN	NaN	NaN	NaN	NaN	NaN	NaN	NaN	NaN	NaN	NaN	NaN	NaN	NaN	NaN	NaN	NaN	NaN	NaN	NaN	NaN	NaN	NaN	NaN	NaN	NaN
-66.1181	NaN	NaN	NaN	NaN	NaN	NaN	NaN	NaN	NaN		NaN	NaN	NaN	NaN	NaN	NaN	NaN	NaN	NaN	NaN	NaN	NaN	NaN	NaN	NaN	NaN	NaN	NaN	NaN	NaN	NaN	NaN	NaN	NaN	NaN	NaN	NaN	NaN	NaN	NaN	NaN	NaN	NaN	NaN	NaN	NaN	NaN	NaN	NaN
-66.0213	NaN	NaN	NaN	NaN	NaN	NaN	NaN	NaN	NaN		NaN	NaN	NaN	NaN	NaN	NaN	NaN	NaN	NaN	NaN	NaN	NaN	NaN	NaN	NaN	NaN	NaN	NaN	NaN	NaN	NaN	NaN	NaN	NaN	NaN	NaN	NaN	NaN	NaN	NaN	NaN	NaN	NaN	NaN	NaN	NaN	NaN	NaN	NaN
-65.9245	NaN	NaN	NaN	NaN	NaN	NaN	NaN	NaN	NaN		NaN	NaN	NaN	NaN	NaN	NaN	NaN	NaN	NaN	NaN	NaN	NaN	NaN	NaN	NaN	NaN	NaN	NaN	NaN	NaN	NaN	NaN	NaN	NaN	NaN	NaN	NaN	NaN	NaN	NaN	NaN	NaN	NaN	NaN	NaN	NaN	NaN	NaN	NaN
-65.8277	NaN	NaN	NaN	NaN	NaN	NaN	NaN	NaN	NaN		NaN	NaN	NaN	NaN	NaN	NaN	NaN	NaN	NaN	NaN	NaN	NaN	NaN	NaN	NaN	NaN	NaN	NaN	NaN	NaN	NaN	NaN	NaN	NaN	NaN	NaN	NaN	NaN	NaN	NaN	NaN	NaN	NaN	NaN	NaN	NaN	NaN	NaN	NaN
-65.7309	NaN	NaN	NaN	NaN	NaN	NaN	NaN	NaN	NaN		NaN	NaN	NaN	NaN	NaN	NaN	NaN	NaN	NaN	NaN	NaN	NaN	NaN	NaN	NaN	NaN	NaN	NaN	NaN	NaN	NaN	NaN	NaN	NaN	NaN	NaN	NaN	NaN	NaN	NaN	NaN	NaN	NaN	NaN	NaN	NaN	NaN	NaN	NaN
-65.6341	NaN	NaN	NaN	NaN	NaN	NaN	NaN	NaN	NaN		NaN	NaN	NaN	NaN	NaN	NaN	NaN	NaN	NaN	NaN	NaN	NaN	NaN	NaN	NaN	NaN	NaN	NaN	NaN	NaN	NaN	NaN	NaN	NaN	NaN	NaN	NaN	NaN	NaN	NaN	NaN	NaN	NaN	NaN	NaN	NaN	NaN	NaN	NaN
-65.5373	NaN	NaN	NaN	NaN	NaN	NaN	NaN	NaN	NaN		NaN	NaN	NaN	NaN	NaN	NaN	NaN	NaN	NaN	NaN	NaN	NaN	NaN	NaN	NaN	NaN	NaN	NaN	NaN	NaN	NaN	NaN	NaN	NaN	NaN	NaN	NaN	NaN	NaN	NaN	NaN	NaN	NaN	NaN	NaN	NaN	NaN	NaN	NaN
-65.4405	NaN	NaN	NaN	NaN	NaN	NaN	NaN	NaN	NaN		NaN	NaN	NaN	NaN	NaN	NaN	NaN	NaN	NaN	NaN	NaN	NaN	NaN	NaN	NaN	NaN	NaN	NaN	NaN	NaN	NaN	NaN	NaN	NaN	NaN	NaN	NaN	NaN	NaN	NaN	NaN	NaN	NaN	NaN	NaN	NaN	NaN	NaN	NaN
-65.3437	NaN	NaN	NaN	NaN	NaN	NaN	NaN	NaN	NaN		NaN	NaN	NaN	NaN	NaN	NaN	NaN	NaN	NaN	NaN	NaN	NaN	NaN	NaN	NaN	NaN	NaN	NaN	NaN	NaN	NaN	NaN	NaN	NaN	NaN	NaN	NaN	NaN	NaN	NaN	NaN	NaN	NaN	NaN	NaN	NaN	NaN	NaN	NaN
-65.2469	NaN	NaN	NaN	NaN	NaN	NaN	NaN	NaN	NaN		NaN	NaN	NaN	NaN	NaN	NaN	NaN	NaN	NaN	NaN	NaN	NaN	NaN	NaN	NaN	NaN	NaN	NaN	NaN	NaN	NaN	NaN	NaN	NaN	NaN	NaN	NaN	NaN	NaN	NaN	NaN	NaN	NaN	NaN	NaN	NaN	NaN	NaN	NaN
-65.15	NaN	NaN	NaN	NaN	NaN	NaN	NaN	NaN	NaN		NaN	NaN	NaN	NaN	NaN	NaN	NaN	NaN	NaN	NaN	NaN	NaN	NaN	NaN	NaN	NaN	NaN	NaN	NaN	NaN	NaN	NaN	NaN	NaN	NaN	NaN	NaN	NaN	NaN	NaN	NaN	NaN	NaN	NaN	NaN	NaN	NaN	NaN	NaN
-65.0532	NaN	NaN	NaN	NaN	NaN	NaN	NaN	NaN	NaN		NaN	NaN	NaN	NaN	NaN	NaN	NaN	NaN	NaN	NaN	NaN	NaN	NaN	NaN	NaN	NaN	NaN	NaN	NaN	NaN	NaN	NaN	NaN	NaN	NaN	NaN	NaN	NaN	NaN	NaN	NaN	NaN	NaN	NaN	NaN	NaN	NaN	NaN	NaN
-64.9564	NaN	NaN	NaN	NaN	NaN	NaN	NaN	NaN	NaN		NaN	NaN	NaN	NaN	NaN	NaN	NaN	NaN	NaN	NaN	NaN	NaN	NaN	NaN	NaN	NaN	NaN	NaN	NaN	NaN	NaN	NaN	NaN	NaN	NaN	NaN	NaN	NaN	NaN	NaN	NaN	NaN	NaN	NaN	NaN	NaN	NaN	NaN	NaN
-64.8596	NaN	NaN	NaN	NaN	NaN	NaN	NaN	NaN	NaN		NaN	NaN	NaN	NaN	NaN	NaN	NaN	NaN	NaN	NaN	NaN	NaN	NaN	NaN	NaN	NaN	NaN	NaN	NaN	NaN	NaN	NaN	NaN	NaN	NaN	NaN	NaN	NaN	NaN	NaN	NaN	NaN	NaN	NaN	NaN	NaN	NaN	NaN	NaN
-64.7628	NaN	NaN	NaN	NaN	NaN	NaN	NaN	NaN	NaN		NaN	NaN	NaN	NaN	NaN	NaN	NaN	NaN	NaN	NaN	NaN	NaN	NaN	NaN	NaN	NaN	NaN	NaN	NaN	NaN	NaN	NaN	NaN	NaN	NaN	NaN	NaN	NaN	NaN	NaN	NaN	NaN	NaN	NaN	NaN	NaN	NaN	NaN	NaN
-64.666	NaN	NaN	NaN	NaN	NaN	NaN	NaN	NaN	NaN		NaN	NaN	NaN	NaN	NaN	NaN	NaN	NaN	NaN	NaN	NaN	NaN	NaN	NaN	NaN	NaN	NaN	NaN	NaN	NaN	NaN	NaN	NaN	NaN	NaN	NaN	NaN	NaN	NaN	NaN	NaN	NaN	NaN	NaN	NaN	NaN	NaN	NaN	NaN
-64.5692	NaN	NaN	NaN	NaN	NaN	NaN	NaN	NaN	NaN		NaN	NaN	NaN	NaN	NaN	NaN	NaN	NaN	NaN	NaN	NaN	NaN	NaN	NaN	NaN	NaN	NaN	NaN	NaN	NaN	NaN	NaN	NaN	NaN	NaN	NaN	NaN	NaN	NaN	NaN	NaN	NaN	NaN	NaN	NaN	NaN	NaN	NaN	NaN
-64.4724	NaN	NaN	NaN	NaN	NaN	NaN	NaN	NaN	NaN		NaN	NaN	NaN	NaN	NaN	NaN	NaN	NaN	NaN	NaN	NaN	NaN	NaN	NaN	NaN	NaN	NaN	NaN	NaN	NaN	NaN	NaN	NaN	NaN	NaN	NaN	NaN	NaN	NaN	NaN	NaN	NaN	NaN	NaN	NaN	NaN	NaN	NaN	NaN
-64.3756	NaN	NaN	NaN	NaN	NaN	NaN	NaN	NaN	NaN		NaN	NaN	NaN	NaN	NaN	NaN	NaN	NaN	NaN	NaN	NaN	NaN	NaN	NaN	NaN	NaN	NaN	NaN	NaN	NaN	NaN	NaN	NaN	NaN	NaN	NaN	NaN	NaN	NaN	NaN	NaN	NaN	NaN	NaN	NaN	NaN	NaN	NaN	NaN
-64.2788	NaN	NaN	NaN	NaN	NaN	NaN	NaN	NaN	NaN		NaN	NaN	NaN	NaN	NaN	NaN	NaN	NaN	NaN	NaN	NaN	NaN	NaN	NaN	NaN	NaN	NaN	NaN	NaN	NaN	NaN	NaN	NaN	NaN	NaN	NaN	NaN	NaN	NaN	NaN	NaN	NaN	NaN	NaN	NaN	NaN	NaN	NaN	NaN
-64.182	NaN	NaN	NaN	NaN	NaN	NaN	NaN	NaN	NaN		NaN	NaN	NaN	NaN	NaN	NaN	NaN	NaN	NaN	NaN	NaN	NaN	NaN	NaN	NaN	NaN	NaN	NaN	NaN	NaN	NaN	NaN	NaN	NaN	NaN	NaN	NaN	NaN	NaN	NaN	NaN	NaN	NaN	NaN	NaN	NaN	NaN	NaN	NaN
-64.0852	NaN	NaN	NaN	NaN	NaN	NaN	NaN	NaN	NaN		NaN	NaN	NaN	NaN	NaN	NaN	NaN	NaN	NaN	NaN	NaN	NaN	NaN	NaN	NaN	NaN	NaN	NaN	NaN	NaN	NaN	NaN	NaN	NaN	NaN	NaN	NaN	NaN	NaN	NaN	NaN	NaN	NaN	NaN	NaN	NaN	NaN	NaN	NaN
-63.9884	NaN	NaN	NaN	NaN	NaN	NaN	NaN	NaN	NaN		NaN	NaN	NaN	NaN	NaN	NaN	NaN	NaN	NaN	NaN	NaN	NaN	NaN	NaN	NaN	NaN	NaN	NaN	NaN	NaN	NaN	NaN	NaN	NaN	NaN	NaN	NaN	NaN	NaN	NaN	NaN	NaN	NaN	NaN	NaN	NaN	NaN	NaN	NaN
-63.8916	NaN	NaN	NaN	NaN	NaN	NaN	NaN	NaN	NaN		NaN	NaN	NaN	NaN	NaN	NaN	NaN	NaN	NaN	NaN	NaN	NaN	NaN	NaN	NaN	NaN	NaN	NaN	NaN	NaN	NaN	NaN	NaN	NaN	NaN	NaN	NaN	NaN	NaN	NaN	NaN	NaN	NaN	NaN	NaN	NaN	NaN	NaN	NaN
-63.7948	NaN	NaN	NaN	NaN	NaN	NaN	NaN	NaN	NaN		NaN	NaN	NaN	NaN	NaN	NaN	NaN	NaN	NaN	NaN	NaN	NaN	NaN	NaN	NaN	NaN	NaN	NaN	NaN	NaN	NaN	NaN	NaN	NaN	NaN	NaN	NaN	NaN	NaN	NaN	NaN	NaN	NaN	NaN	NaN	NaN	NaN	NaN	NaN
-63.698	NaN	NaN	NaN	NaN	NaN	NaN	NaN	NaN	NaN		NaN	NaN	NaN	NaN	NaN	NaN	NaN	NaN	NaN	NaN	NaN	NaN	NaN	NaN	NaN	NaN	NaN	NaN	NaN	NaN	NaN	NaN	NaN	NaN	NaN	NaN	NaN	NaN	NaN	NaN	NaN	NaN	NaN	NaN	NaN	NaN	NaN	NaN	NaN
-63.6012	NaN	NaN	NaN	NaN	NaN	NaN	NaN	NaN	NaN		NaN	NaN	NaN	NaN	NaN	NaN	NaN	NaN	NaN	NaN	NaN	NaN	NaN	NaN	NaN	NaN	NaN	NaN	NaN	NaN	NaN	NaN	NaN	NaN	NaN	NaN	NaN	NaN	NaN	NaN	NaN	NaN	NaN	NaN	NaN	NaN	NaN	NaN	NaN
-63.5044	NaN	NaN	NaN	NaN	NaN	NaN	NaN	NaN	NaN		NaN	NaN	NaN	NaN	NaN	NaN	NaN	NaN	NaN	NaN	NaN	NaN	NaN	NaN	NaN	NaN	NaN	NaN	NaN	NaN	NaN	NaN	NaN	NaN	NaN	NaN	NaN	NaN	NaN	NaN	NaN	NaN	NaN	NaN	NaN	NaN	NaN	NaN	NaN
-63.4076	NaN	NaN	NaN	NaN	NaN	NaN	NaN	NaN	NaN		NaN	NaN	NaN	NaN	NaN	NaN	NaN	NaN	NaN	NaN	NaN	NaN	NaN	NaN	NaN	NaN	NaN	NaN	NaN	NaN	NaN	NaN	NaN	NaN	NaN	NaN	NaN	NaN	NaN	NaN	NaN	NaN	NaN	NaN	NaN	NaN	NaN	NaN	NaN
-63.3107	NaN	NaN	NaN	NaN	NaN	NaN	NaN	NaN	NaN		NaN	NaN	NaN	NaN	NaN	NaN	NaN	NaN	NaN	NaN	NaN	NaN	NaN	NaN	NaN	NaN	NaN	NaN	NaN	NaN	NaN	NaN	NaN	NaN	NaN	NaN	NaN	NaN	NaN	NaN	NaN	NaN	NaN	NaN	NaN	NaN	NaN	NaN	NaN
-63.2139	NaN	NaN	NaN	NaN	NaN	NaN	NaN	NaN	NaN		NaN	NaN	NaN	NaN	NaN	NaN	NaN	NaN	NaN	NaN	NaN	NaN	NaN	NaN	NaN	NaN	NaN	NaN	NaN	NaN	NaN	NaN	NaN	NaN	NaN	NaN	NaN	NaN	NaN	NaN	NaN	NaN	NaN	NaN	NaN	NaN	NaN	NaN	NaN
-63.1171	NaN	NaN	NaN	NaN	NaN	NaN	NaN	NaN	NaN		NaN	NaN	NaN	NaN	NaN	NaN	NaN	NaN	NaN	NaN	NaN	NaN	NaN	NaN	NaN	NaN	NaN	NaN	NaN	NaN	NaN	NaN	NaN	NaN	NaN	NaN	NaN	NaN	NaN	NaN	NaN	NaN	NaN	NaN	NaN	NaN	NaN	NaN	NaN
-63.0203	NaN	NaN	NaN	NaN	NaN	NaN	NaN	NaN	NaN		NaN	NaN	NaN	NaN	NaN	NaN	NaN	NaN	NaN	NaN	NaN	NaN	NaN	NaN	NaN	NaN	NaN	NaN	NaN	NaN	NaN	NaN	NaN	NaN	NaN	NaN	NaN	NaN	NaN	NaN	NaN	NaN	NaN	NaN	NaN	NaN	NaN	NaN	NaN
-62.9235	NaN	NaN	NaN	NaN	NaN	NaN	NaN	NaN	NaN		NaN	NaN	NaN	NaN	NaN	NaN	NaN	NaN	NaN	NaN	NaN	NaN	NaN	NaN	NaN	NaN	NaN	NaN	NaN	NaN	NaN	NaN	NaN	NaN	NaN	NaN	NaN	NaN	NaN	NaN	NaN	NaN	NaN	NaN	NaN	NaN	NaN	NaN	NaN
-62.8267	NaN	NaN	NaN	NaN	NaN	NaN	NaN	NaN	NaN		NaN	NaN	NaN	NaN	NaN	NaN	NaN	NaN	NaN	NaN	NaN	NaN	NaN	NaN	NaN	NaN	NaN	NaN	NaN	NaN	NaN	NaN	NaN	NaN	NaN	NaN	NaN	NaN	NaN	NaN	NaN	NaN	NaN	NaN	NaN	NaN	NaN	NaN	NaN
-62.7299	NaN	NaN	NaN	NaN	NaN	NaN	NaN	NaN	NaN		NaN	NaN	NaN	NaN	NaN	NaN	NaN	NaN	NaN	NaN	NaN	NaN	NaN	NaN	NaN	NaN	NaN	NaN	NaN	NaN	NaN	NaN	NaN	NaN	NaN	NaN	NaN	NaN	NaN	NaN	NaN	NaN	NaN	NaN	NaN	NaN	NaN	NaN	NaN
-62.6331	NaN	NaN	NaN	NaN	NaN	NaN	NaN	NaN	NaN		NaN	NaN	NaN	NaN	NaN	NaN	NaN	NaN	NaN	NaN	NaN	NaN	NaN	NaN	NaN	NaN	NaN	NaN	NaN	NaN	NaN	NaN	NaN	NaN	NaN	NaN	NaN	NaN	NaN	NaN	NaN	NaN	NaN	NaN	NaN	NaN	NaN	NaN	NaN
-62.5363	NaN	NaN	NaN	NaN	NaN	NaN	NaN	NaN	NaN		NaN	NaN	NaN	NaN	NaN	NaN	NaN	NaN	NaN	NaN	NaN	NaN	NaN	NaN	NaN	NaN	NaN	NaN	NaN	NaN	NaN	NaN	NaN	NaN	NaN	NaN	NaN	NaN	NaN	NaN	NaN	NaN	NaN	NaN	NaN	NaN	NaN	NaN	NaN
-62.4395	NaN	NaN	NaN	NaN	NaN	NaN	NaN	NaN	NaN		NaN	NaN	NaN	NaN	NaN	NaN	NaN	NaN	NaN	NaN	NaN	NaN	NaN	NaN	NaN	NaN	NaN	NaN	NaN	NaN	NaN	NaN	NaN	NaN	NaN	NaN	NaN	NaN	NaN	NaN	NaN	NaN	NaN	NaN	NaN	NaN	NaN	NaN	NaN
-62.3427	NaN	NaN	NaN	NaN	NaN	NaN	NaN	NaN	NaN		NaN	NaN	NaN	NaN	NaN	NaN	NaN	NaN	NaN	NaN	NaN	NaN	NaN	NaN	NaN	NaN	NaN	NaN	NaN	NaN	NaN	NaN	NaN	NaN	NaN	NaN	NaN	NaN	NaN	NaN	NaN	NaN	NaN	NaN	NaN	NaN	NaN	NaN	NaN
-62.2459	NaN	NaN	NaN	NaN	NaN	NaN	NaN	NaN	NaN		NaN	NaN	NaN	NaN	NaN	NaN	NaN	NaN	NaN	NaN	NaN	NaN	NaN	NaN	NaN	NaN	NaN	NaN	NaN	NaN	NaN	NaN	NaN	NaN	NaN	NaN	NaN	NaN	NaN	NaN	NaN	NaN	NaN	NaN	NaN	NaN	NaN	NaN	NaN
-62.1491	NaN	NaN	NaN	NaN	NaN	NaN	NaN	NaN	NaN		NaN	NaN	NaN	NaN	NaN	NaN	NaN	NaN	NaN	NaN	NaN	NaN	NaN	NaN	NaN	NaN	NaN	NaN	NaN	NaN	NaN	NaN	NaN	NaN	NaN	NaN	NaN	NaN	NaN	NaN	NaN	NaN	NaN	NaN	NaN	NaN	NaN	NaN	NaN
-62.0523	NaN	NaN	NaN	NaN	NaN	NaN	NaN	NaN	NaN		NaN	NaN	NaN	NaN	NaN	NaN	NaN	NaN	NaN	NaN	NaN	NaN	NaN	NaN	NaN	NaN	NaN	NaN	NaN	NaN	NaN	NaN	NaN	NaN	NaN	NaN	NaN	NaN	NaN	NaN	NaN	NaN	NaN	NaN	NaN	NaN	NaN	NaN	NaN
-61.9555	NaN	NaN	NaN	NaN	NaN	NaN	NaN	NaN	NaN		NaN	NaN	NaN	NaN	NaN	NaN	NaN	NaN	NaN	NaN	NaN	NaN	NaN	NaN	NaN	NaN	NaN	NaN	NaN	NaN	NaN	NaN	NaN	NaN	NaN	NaN	NaN	NaN	NaN	NaN	NaN	NaN	NaN	NaN	NaN	NaN	NaN	NaN	NaN
-61.8587	NaN	NaN	NaN	NaN	NaN	NaN	NaN	NaN	NaN		NaN	NaN	NaN	NaN	NaN	NaN	NaN	NaN	NaN	NaN	NaN	NaN	NaN	NaN	NaN	NaN	NaN	NaN	NaN	NaN	NaN	NaN	NaN	NaN	NaN	NaN	NaN	NaN	NaN	NaN	NaN	NaN	NaN	NaN	NaN	NaN	NaN	NaN	NaN
-61.7619	NaN	NaN	NaN	NaN	NaN	NaN	NaN	NaN	NaN		NaN	NaN	NaN	NaN	NaN	NaN	NaN	NaN	NaN	NaN	NaN	NaN	NaN	NaN	NaN	NaN	NaN	NaN	NaN	NaN	NaN	NaN	NaN	NaN	NaN	NaN	NaN	NaN	NaN	NaN	NaN	NaN	NaN	NaN	NaN	NaN	NaN	NaN	NaN
-61.6651	NaN	NaN	NaN	NaN	NaN	NaN	NaN	NaN	NaN		NaN	NaN	NaN	NaN	NaN	NaN	NaN	NaN	NaN	NaN	NaN	NaN	NaN	NaN	NaN	NaN	NaN	NaN	NaN	NaN	NaN	NaN	NaN	NaN	NaN	NaN	NaN	NaN	NaN	NaN	NaN	NaN	NaN	NaN	NaN	NaN	NaN	NaN	NaN
-61.5682	NaN	NaN	NaN	NaN	NaN	NaN	NaN	NaN	NaN		NaN	NaN	NaN	NaN	NaN	NaN	NaN	NaN	NaN	NaN	NaN	NaN	NaN	NaN	NaN	NaN	NaN	NaN	NaN	NaN	NaN	NaN	NaN	NaN	NaN	NaN	NaN	NaN	NaN	NaN	NaN	NaN	NaN	NaN	NaN	NaN	NaN	NaN	NaN
-61.4714	NaN	NaN	NaN	NaN	NaN	NaN	NaN	NaN	NaN		NaN	NaN	NaN	NaN	NaN	NaN	NaN	NaN	NaN	NaN	NaN	NaN	NaN	NaN	NaN	NaN	NaN	NaN	NaN	NaN	NaN	NaN	NaN	NaN	NaN	NaN	NaN	NaN	NaN	NaN	NaN	NaN	NaN	NaN	NaN	NaN	NaN	NaN	NaN
-61.3746	NaN	NaN	NaN	NaN	NaN	NaN	NaN	NaN	NaN		NaN	NaN	NaN	NaN	NaN	NaN	NaN	NaN	NaN	NaN	NaN	NaN	NaN	NaN	NaN	NaN	NaN	NaN	NaN	NaN	NaN	NaN	NaN	NaN	NaN	NaN	NaN	NaN	NaN	NaN	NaN	NaN	NaN	NaN	NaN	NaN	NaN	NaN	NaN
-61.2778	NaN	NaN	NaN	NaN	NaN	NaN	NaN	NaN	NaN		NaN	NaN	NaN	NaN	NaN	NaN	NaN	NaN	NaN	NaN	NaN	NaN	NaN	NaN	NaN	NaN	NaN	NaN	NaN	NaN	NaN	NaN	NaN	NaN	NaN	NaN	NaN	NaN	NaN	NaN	NaN	NaN	NaN	NaN	NaN	NaN	NaN	NaN	NaN
-61.181	NaN	NaN	NaN	NaN	NaN	NaN	NaN	NaN	NaN		NaN	NaN	NaN	NaN	NaN	NaN	NaN	NaN	NaN	NaN	NaN	NaN	NaN	NaN	NaN	NaN	NaN	NaN	NaN	NaN	NaN	NaN	NaN	NaN	NaN	NaN	NaN	NaN	NaN	NaN	NaN	NaN	NaN	NaN	NaN	NaN	NaN	NaN	NaN
-61.0842	NaN	NaN	NaN	NaN	NaN	NaN	NaN	NaN	NaN		NaN	NaN	NaN	NaN	NaN	NaN	NaN	NaN	NaN	NaN	NaN	NaN	NaN	NaN	NaN	NaN	NaN	NaN	NaN	NaN	NaN	NaN	NaN	NaN	NaN	NaN	NaN	NaN	NaN	NaN	NaN	NaN	NaN	NaN	NaN	NaN	NaN	NaN	NaN
-60.9874	NaN	NaN	NaN	NaN	NaN	NaN	NaN	NaN	NaN		NaN	NaN	NaN	NaN	NaN	NaN	NaN	NaN	NaN	NaN	NaN	NaN	NaN	NaN	NaN	NaN	NaN	NaN	NaN	NaN	NaN	NaN	NaN	NaN	NaN	NaN	NaN	NaN	NaN	NaN	NaN	NaN	NaN	NaN	NaN	NaN	NaN	NaN	NaN
-60.8906	NaN	NaN	NaN	NaN	NaN	NaN	NaN	NaN	NaN		NaN	NaN	NaN	NaN	NaN	NaN	NaN	NaN	NaN	NaN	NaN	NaN	NaN	NaN	NaN	NaN	NaN	NaN	NaN	NaN	NaN	NaN	NaN	NaN	NaN	NaN	NaN	NaN	NaN	NaN	NaN	NaN	NaN	NaN	NaN	NaN	NaN	NaN	NaN
-60.7938	NaN	NaN	NaN	NaN	NaN	NaN	NaN	NaN	NaN		NaN	NaN	NaN	NaN	NaN	NaN	NaN	NaN	NaN	NaN	NaN	NaN	NaN	NaN	NaN	NaN	NaN	NaN	NaN	NaN	NaN	NaN	NaN	NaN	NaN	NaN	NaN	NaN	NaN	NaN	NaN	NaN	NaN	NaN	NaN	NaN	NaN	NaN	NaN
-60.697	NaN	NaN	NaN	NaN	NaN	NaN	NaN	NaN	NaN		NaN	NaN	NaN	NaN	NaN	NaN	NaN	NaN	NaN	NaN	NaN	NaN	NaN	NaN	NaN	NaN	NaN	NaN	NaN	NaN	NaN	NaN	NaN	NaN	NaN	NaN	NaN	NaN	NaN	NaN	NaN	NaN	NaN	NaN	NaN	NaN	NaN	NaN	NaN
-60.6002	NaN	NaN	NaN	NaN	NaN	NaN	NaN	NaN	NaN		NaN	NaN	NaN	NaN	NaN	NaN	NaN	NaN	NaN	NaN	NaN	NaN	NaN	NaN	NaN	NaN	NaN	NaN	NaN	NaN	NaN	NaN	NaN	NaN	NaN	NaN	NaN	NaN	NaN	NaN	NaN	NaN	NaN	NaN	NaN	NaN	NaN	NaN	NaN
-60.5034	NaN	NaN	NaN	NaN	NaN	NaN	NaN	NaN	NaN		NaN	NaN	NaN	NaN	NaN	NaN	NaN	NaN	NaN	NaN	NaN	NaN	NaN	NaN	NaN	NaN	NaN	NaN	NaN	NaN	NaN	NaN	NaN	NaN	NaN	NaN	NaN	NaN	NaN	NaN	NaN	NaN	NaN	NaN	NaN	NaN	NaN	NaN	NaN
-60.4066	NaN	NaN	NaN	NaN	NaN	NaN	NaN	NaN	NaN		NaN	NaN	NaN	NaN	NaN	NaN	NaN	NaN	NaN	NaN	NaN	NaN	NaN	NaN	NaN	NaN	NaN	NaN	NaN	NaN	NaN	NaN	NaN	NaN	NaN	NaN	NaN	NaN	NaN	NaN	NaN	NaN	NaN	NaN	NaN	NaN	NaN	NaN	NaN
-60.3098	NaN	NaN	NaN	NaN	NaN	NaN	NaN	NaN	NaN		NaN	NaN	NaN	NaN	NaN	NaN	NaN	NaN	NaN	NaN	NaN	NaN	NaN	NaN	NaN	NaN	NaN	NaN	NaN	NaN	NaN	NaN	NaN	NaN	NaN	NaN	NaN	NaN	NaN	NaN	NaN	NaN	NaN	NaN	NaN	NaN	NaN	NaN	NaN
-60.213	NaN	NaN	NaN	NaN	NaN	NaN	NaN	NaN	NaN		NaN	NaN	NaN	NaN	NaN	NaN	NaN	NaN	NaN	NaN	NaN	NaN	NaN	NaN	NaN	NaN	NaN	NaN	NaN	NaN	NaN	NaN	NaN	NaN	NaN	NaN	NaN	NaN	NaN	NaN	NaN	NaN	NaN	NaN	NaN	NaN	NaN	NaN	NaN
-60.1162	NaN	NaN	NaN	NaN	NaN	NaN	NaN	NaN	NaN		NaN	NaN	NaN	NaN	NaN	NaN	NaN	NaN	NaN	NaN	NaN	NaN	NaN	NaN	NaN	NaN	NaN	NaN	NaN	NaN	NaN	NaN	NaN	NaN	NaN	NaN	NaN	NaN	NaN	NaN	NaN	NaN	NaN	NaN	NaN	NaN	NaN	NaN	NaN
-60.0194	NaN	NaN	NaN	NaN	NaN	NaN	NaN	NaN	NaN		NaN	NaN	NaN	NaN	NaN	NaN	NaN	NaN	NaN	NaN	NaN	NaN	NaN	NaN	NaN	NaN	NaN	NaN	NaN	NaN	NaN	NaN	NaN	NaN	NaN	NaN	NaN	NaN	NaN	NaN	NaN	NaN	NaN	NaN	NaN	NaN	NaN	NaN	NaN
-59.9226	NaN	NaN	NaN	NaN	NaN	NaN	NaN	NaN	NaN		NaN	NaN	NaN	NaN	NaN	NaN	NaN	NaN	NaN	NaN	NaN	NaN	NaN	NaN	NaN	NaN	NaN	NaN	NaN	NaN	NaN	NaN	NaN	NaN	NaN	NaN	NaN	NaN	NaN	NaN	NaN	NaN	NaN	NaN	NaN	NaN	NaN	NaN	NaN
-59.8258	NaN	NaN	NaN	NaN	NaN	NaN	NaN	NaN	NaN		NaN	NaN	NaN	NaN	NaN	NaN	NaN	NaN	NaN	NaN	NaN	NaN	NaN	NaN	NaN	NaN	NaN	NaN	NaN	NaN	NaN	NaN	NaN	NaN	NaN	NaN	NaN	NaN	NaN	NaN	NaN	NaN	NaN	NaN	NaN	NaN	NaN	NaN	NaN
-59.7289	NaN	NaN	NaN	NaN	NaN	NaN	NaN	NaN	NaN		NaN	NaN	NaN	NaN	NaN	NaN	NaN	NaN	NaN	NaN	NaN	NaN	NaN	NaN	NaN	NaN	NaN	NaN	NaN	NaN	NaN	NaN	NaN	NaN	NaN	NaN	NaN	NaN	NaN	NaN	NaN	NaN	NaN	NaN	NaN	NaN	NaN	NaN	NaN
-59.6321	NaN	NaN	NaN	NaN	NaN	NaN	NaN	NaN	NaN		NaN	NaN	NaN	NaN	NaN	NaN	NaN	NaN	NaN	NaN	NaN	NaN	NaN	NaN	NaN	NaN	NaN	NaN	NaN	NaN	NaN	NaN	NaN	NaN	NaN	NaN	NaN	NaN	NaN	NaN	NaN	NaN	NaN	NaN	NaN	NaN	NaN	NaN	NaN
-59.5353	NaN	NaN	NaN	NaN	NaN	NaN	NaN	NaN	NaN		NaN	NaN	NaN	NaN	NaN	NaN	NaN	NaN	NaN	NaN	NaN	NaN	NaN	NaN	NaN	NaN	NaN	NaN	NaN	NaN	NaN	NaN	NaN	NaN	NaN	NaN	NaN	NaN	NaN	NaN	NaN	NaN	NaN	NaN	NaN	NaN	NaN	NaN	NaN
-59.4385	NaN	NaN	NaN	NaN	NaN	NaN	NaN	NaN	NaN		NaN	NaN	NaN	NaN	NaN	NaN	NaN	NaN	NaN	NaN	NaN	NaN	NaN	NaN	NaN	NaN	NaN	NaN	NaN	NaN	NaN	NaN	NaN	NaN	NaN	NaN	NaN	NaN	NaN	NaN	NaN	NaN	NaN	NaN	NaN	NaN	NaN	NaN	NaN
-59.3417	NaN	NaN	NaN	NaN	NaN	NaN	NaN	NaN	NaN		NaN	NaN	NaN	NaN	NaN	NaN	NaN	NaN	NaN	NaN	NaN	NaN	NaN	NaN	NaN	NaN	NaN	NaN	NaN	NaN	NaN	NaN	NaN	NaN	NaN	NaN	NaN	NaN	NaN	NaN	NaN	NaN	NaN	NaN	NaN	NaN	NaN	NaN	NaN
-59.2449	NaN	NaN	NaN	NaN	NaN	NaN	NaN	NaN	NaN		NaN	NaN	NaN	NaN	NaN	NaN	NaN	NaN	NaN	NaN	NaN	NaN	NaN	NaN	NaN	NaN	NaN	NaN	NaN	NaN	NaN	NaN	NaN	NaN	NaN	NaN	NaN	NaN	NaN	NaN	NaN	NaN	NaN	NaN	NaN	NaN	NaN	NaN	NaN
-59.1481	NaN	NaN	NaN	NaN	NaN	NaN	NaN	NaN	NaN		NaN	NaN	NaN	NaN	NaN	NaN	NaN	NaN	NaN	NaN	NaN	NaN	NaN	NaN	NaN	NaN	NaN	NaN	NaN	NaN	NaN	NaN	NaN	NaN	NaN	NaN	NaN	NaN	NaN	NaN	NaN	NaN	NaN	NaN	NaN	NaN	NaN	NaN	NaN
-59.0513	NaN	NaN	NaN	NaN	NaN	NaN	NaN	NaN	NaN		NaN	NaN	NaN	NaN	NaN	NaN	NaN	NaN	NaN	NaN	NaN	NaN	NaN	NaN	NaN	NaN	NaN	NaN	NaN	NaN	NaN	NaN	NaN	NaN	NaN	NaN	NaN	NaN	NaN	NaN	NaN	NaN	NaN	NaN	NaN	NaN	NaN	NaN	NaN
-58.9545	NaN	NaN	NaN	NaN	NaN	NaN	NaN	NaN	NaN		NaN	NaN	NaN	NaN	NaN	NaN	NaN	NaN	NaN	NaN	NaN	NaN	NaN	NaN	NaN	NaN	NaN	NaN	NaN	NaN	NaN	NaN	NaN	NaN	NaN	NaN	NaN	NaN	NaN	NaN	NaN	NaN	NaN	NaN	NaN	NaN	NaN	NaN	NaN
-58.8577	NaN	NaN	NaN	NaN	NaN	NaN	NaN	NaN	NaN		NaN	NaN	NaN	NaN	NaN	NaN	NaN	NaN	NaN	NaN	NaN	NaN	NaN	NaN	NaN	NaN	NaN	NaN	NaN	NaN	NaN	NaN	NaN	NaN	NaN	NaN	NaN	NaN	NaN	NaN	NaN	NaN	NaN	NaN	NaN	NaN	NaN	NaN	NaN
-58.7609	NaN	NaN	NaN	NaN	NaN	NaN	NaN	NaN	NaN		NaN	NaN	NaN	NaN	NaN	NaN	NaN	NaN	NaN	NaN	NaN	NaN	NaN	NaN	NaN	NaN	NaN	NaN	NaN	NaN	NaN	NaN	NaN	NaN	NaN	NaN	NaN	NaN	NaN	NaN	NaN	NaN	NaN	NaN	NaN	NaN	NaN	NaN	NaN
-58.6641	NaN	NaN	NaN	NaN	NaN	NaN	NaN	NaN	NaN		NaN	NaN	NaN	NaN	NaN	NaN	NaN	NaN	NaN	NaN	NaN	NaN	NaN	NaN	NaN	NaN	NaN	NaN	NaN	NaN	NaN	NaN	NaN	NaN	NaN	NaN	NaN	NaN	NaN	NaN	NaN	NaN	NaN	NaN	NaN	NaN	NaN	NaN	NaN
-58.5673	NaN	NaN	NaN	NaN	NaN	NaN	NaN	NaN	NaN		NaN	NaN	NaN	NaN	NaN	NaN	NaN	NaN	NaN	NaN	NaN	NaN	NaN	NaN	NaN	NaN	NaN	NaN	NaN	NaN	NaN	NaN	NaN	NaN	NaN	NaN	NaN	NaN	NaN	NaN	NaN	NaN	NaN	NaN	NaN	NaN	NaN	NaN	NaN
-58.4705	NaN	NaN	NaN	NaN	NaN	NaN	NaN	NaN	NaN		NaN	NaN	NaN	NaN	NaN	NaN	NaN	NaN	NaN	NaN	NaN	NaN	NaN	NaN	NaN	NaN	NaN	NaN	NaN	NaN	NaN	NaN	NaN	NaN	NaN	NaN	NaN	NaN	NaN	NaN	NaN	NaN	NaN	NaN	NaN	NaN	NaN	NaN	NaN
-58.3737	NaN	NaN	NaN	NaN	NaN	NaN	NaN	NaN	NaN		NaN	NaN	NaN	NaN	NaN	NaN	NaN	NaN	NaN	NaN	NaN	NaN	NaN	NaN	NaN	NaN	NaN	NaN	NaN	NaN	NaN	NaN	NaN	NaN	NaN	NaN	NaN	NaN	NaN	NaN	NaN	NaN	NaN	NaN	NaN	NaN	NaN	NaN	NaN
-58.2769	NaN	NaN	NaN	NaN	NaN	NaN	NaN	NaN	NaN		NaN	NaN	NaN	NaN	NaN	NaN	NaN	NaN	NaN	NaN	NaN	NaN	NaN	NaN	NaN	NaN	NaN	NaN	NaN	NaN	NaN	NaN	NaN	NaN	NaN	NaN	NaN	NaN	NaN	NaN	NaN	NaN	NaN	NaN	NaN	NaN	NaN	NaN	NaN
-58.1801	NaN	NaN	NaN	NaN	NaN	NaN	NaN	NaN	NaN		NaN	NaN	NaN	NaN	NaN	NaN	NaN	NaN	NaN	NaN	NaN	NaN	NaN	NaN	NaN	NaN	NaN	NaN	NaN	NaN	NaN	NaN	NaN	NaN	NaN	NaN	NaN	NaN	NaN	NaN	NaN	NaN	NaN	NaN	NaN	NaN	NaN	NaN	NaN
-58.0833	NaN	NaN	NaN	NaN	NaN	NaN	NaN	NaN	NaN		NaN	NaN	NaN	NaN	NaN	NaN	NaN	NaN	NaN	NaN	NaN	NaN	NaN	NaN	NaN	NaN	NaN	NaN	NaN	NaN	NaN	NaN	NaN	NaN	NaN	NaN	NaN	NaN	NaN	NaN	NaN	NaN	NaN	NaN	NaN	NaN	NaN	NaN	NaN
-57.9864	NaN	NaN	NaN	NaN	NaN	NaN	NaN	NaN	NaN		NaN	NaN	NaN	NaN	NaN	NaN	NaN	NaN	NaN	NaN	NaN	NaN	NaN	NaN	NaN	NaN	NaN	NaN	NaN	NaN	NaN	NaN	NaN	NaN	NaN	NaN	NaN	NaN	NaN	NaN	NaN	NaN	NaN	NaN	NaN	NaN	NaN	NaN	NaN
-57.8896	NaN	NaN	NaN	NaN	NaN	NaN	NaN	NaN	NaN		NaN	NaN	NaN	NaN	NaN	NaN	NaN	NaN	NaN	NaN	NaN	NaN	NaN	NaN	NaN	NaN	NaN	NaN	NaN	NaN	NaN	NaN	NaN	NaN	NaN	NaN	NaN	NaN	NaN	NaN	NaN	NaN	NaN	NaN	NaN	NaN	NaN	NaN	NaN
-57.7928	NaN	NaN	NaN	NaN	NaN	NaN	NaN	NaN	NaN		NaN	NaN	NaN	NaN	NaN	NaN	NaN	NaN	NaN	NaN	NaN	NaN	NaN	NaN	NaN	NaN	NaN	NaN	NaN	NaN	NaN	NaN	NaN	NaN	NaN	NaN	NaN	NaN	NaN	NaN	NaN	NaN	NaN	NaN	NaN	NaN	NaN	NaN	NaN
-57.696	NaN	NaN	NaN	NaN	NaN	NaN	NaN	NaN	NaN		NaN	NaN	NaN	NaN	NaN	NaN	NaN	NaN	NaN	NaN	NaN	NaN	NaN	NaN	NaN	NaN	NaN	NaN	NaN	NaN	NaN	NaN	NaN	NaN	NaN	NaN	NaN	NaN	NaN	NaN	NaN	NaN	NaN	NaN	NaN	NaN	NaN	NaN	NaN
-57.5992	NaN	NaN	NaN	NaN	NaN	NaN	NaN	NaN	NaN		NaN	NaN	NaN	NaN	NaN	NaN	NaN	NaN	NaN	NaN	NaN	NaN	NaN	NaN	NaN	NaN	NaN	NaN	NaN	NaN	NaN	NaN	NaN	NaN	NaN	NaN	NaN	NaN	NaN	NaN	NaN	NaN	NaN	NaN	NaN	NaN	NaN	NaN	NaN
-57.5024	NaN	NaN	NaN	NaN	NaN	NaN	NaN	NaN	NaN		NaN	NaN	NaN	NaN	NaN	NaN	NaN	NaN	NaN	NaN	NaN	NaN	NaN	NaN	NaN	NaN	NaN	NaN	NaN	NaN	NaN	NaN	NaN	NaN	NaN	NaN	NaN	NaN	NaN	NaN	NaN	NaN	NaN	NaN	NaN	NaN	NaN	NaN	NaN
-57.4056	NaN	NaN	NaN	NaN	NaN	NaN	NaN	NaN	NaN		NaN	NaN	NaN	NaN	NaN	NaN	NaN	NaN	NaN	NaN	NaN	NaN	NaN	NaN	NaN	NaN	NaN	NaN	NaN	NaN	NaN	NaN	NaN	NaN	NaN	NaN	NaN	NaN	NaN	NaN	NaN	NaN	NaN	NaN	NaN	NaN	NaN	NaN	NaN
-57.3088	NaN	NaN	NaN	NaN	NaN	NaN	NaN	NaN	NaN		NaN	NaN	NaN	NaN	NaN	NaN	NaN	NaN	NaN	NaN	NaN	NaN	NaN	NaN	NaN	NaN	NaN	NaN	NaN	NaN	NaN	NaN	NaN	NaN	NaN	NaN	NaN	NaN	NaN	NaN	NaN	NaN	NaN	NaN	NaN	NaN	NaN	NaN	NaN
-57.212	NaN	NaN	NaN	NaN	NaN	NaN	NaN	NaN	NaN		NaN	NaN	NaN	NaN	NaN	NaN	NaN	NaN	NaN	NaN	NaN	NaN	NaN	NaN	NaN	NaN	NaN	NaN	NaN	NaN	NaN	NaN	NaN	NaN	NaN	NaN	NaN	NaN	NaN	NaN	NaN	NaN	NaN	NaN	NaN	NaN	NaN	NaN	NaN
-57.1152	NaN	NaN	NaN	NaN	NaN	NaN	NaN	NaN	NaN		NaN	NaN	NaN	NaN	NaN	NaN	NaN	NaN	NaN	NaN	NaN	NaN	NaN	NaN	NaN	NaN	NaN	NaN	NaN	NaN	NaN	NaN	NaN	NaN	NaN	NaN	NaN	NaN	NaN	NaN	NaN	NaN	NaN	NaN	NaN	NaN	NaN	NaN	NaN
-57.0184	NaN	NaN	NaN	NaN	NaN	NaN	NaN	NaN	NaN		NaN	NaN	NaN	NaN	NaN	NaN	NaN	NaN	NaN	NaN	NaN	NaN	NaN	NaN	NaN	NaN	NaN	NaN	NaN	NaN	NaN	NaN	NaN	NaN	NaN	NaN	NaN	NaN	NaN	NaN	NaN	NaN	NaN	NaN	NaN	NaN	NaN	NaN	NaN
-56.9216	NaN	NaN	NaN	NaN	NaN	NaN	NaN	NaN	NaN		NaN	NaN	NaN	NaN	NaN	NaN	NaN	NaN	NaN	NaN	NaN	NaN	NaN	NaN	NaN	NaN	NaN	NaN	NaN	NaN	NaN	NaN	NaN	NaN	NaN	NaN	NaN	NaN	NaN	NaN	NaN	NaN	NaN	NaN	NaN	NaN	NaN	NaN	NaN
-56.8248	NaN	NaN	NaN	NaN	NaN	NaN	NaN	NaN	NaN		NaN	NaN	NaN	NaN	NaN	NaN	NaN	NaN	NaN	NaN	NaN	NaN	NaN	NaN	NaN	NaN	NaN	NaN	NaN	NaN	NaN	NaN	NaN	NaN	NaN	NaN	NaN	NaN	NaN	NaN	NaN	NaN	NaN	NaN	NaN	NaN	NaN	NaN	NaN
-56.728	NaN	NaN	NaN	NaN	NaN	NaN	NaN	NaN	NaN		NaN	NaN	NaN	NaN	NaN	NaN	NaN	NaN	NaN	NaN	NaN	NaN	NaN	NaN	NaN	NaN	NaN	NaN	NaN	NaN	NaN	NaN	NaN	NaN	NaN	NaN	NaN	NaN	NaN	NaN	NaN	NaN	NaN	NaN	NaN	NaN	NaN	NaN	NaN
-56.6312	NaN	NaN	NaN	NaN	NaN	NaN	NaN	NaN	NaN		NaN	NaN	NaN	NaN	NaN	NaN	NaN	NaN	NaN	NaN	NaN	NaN	NaN	NaN	NaN	NaN	NaN	NaN	NaN	NaN	NaN	NaN	NaN	NaN	NaN	NaN	NaN	NaN	NaN	NaN	NaN	NaN	NaN	NaN	NaN	NaN	NaN	NaN	NaN
-56.5344	NaN	NaN	NaN	NaN	NaN	NaN	NaN	NaN	NaN		NaN	NaN	NaN	NaN	NaN	NaN	NaN	NaN	NaN	NaN	NaN	NaN	NaN	NaN	NaN	NaN	NaN	NaN	NaN	NaN	NaN	NaN	NaN	NaN	NaN	NaN	NaN	NaN	NaN	NaN	NaN	NaN	NaN	NaN	NaN	NaN	NaN	NaN	NaN
-56.4376	NaN	NaN	NaN	NaN	NaN	NaN	NaN	NaN	NaN		NaN	NaN	NaN	NaN	NaN	NaN	NaN	NaN	NaN	NaN	NaN	NaN	NaN	NaN	NaN	NaN	NaN	NaN	NaN	NaN	NaN	NaN	NaN	NaN	NaN	NaN	NaN	NaN	NaN	NaN	NaN	NaN	NaN	NaN	NaN	NaN	NaN	NaN	NaN
-56.3408	NaN	NaN	NaN	NaN	NaN	NaN	NaN	NaN	NaN		NaN	NaN	NaN	NaN	NaN	NaN	NaN	NaN	NaN	NaN	NaN	NaN	NaN	NaN	NaN	NaN	NaN	NaN	NaN	NaN	NaN	NaN	NaN	NaN	NaN	NaN	NaN	NaN	NaN	NaN	NaN	NaN	NaN	NaN	NaN	NaN	NaN	NaN	NaN
-56.2439	NaN	NaN	NaN	NaN	NaN	NaN	NaN	NaN	NaN		NaN	NaN	NaN	NaN	NaN	NaN	NaN	NaN	NaN	NaN	NaN	NaN	NaN	NaN	NaN	NaN	NaN	NaN	NaN	NaN	NaN	NaN	NaN	NaN	NaN	NaN	NaN	NaN	NaN	NaN	NaN	NaN	NaN	NaN	NaN	NaN	NaN	NaN	NaN
-56.1471	NaN	NaN	NaN	NaN	NaN	NaN	NaN	NaN	NaN		NaN	NaN	NaN	NaN	NaN	NaN	NaN	NaN	NaN	NaN	NaN	NaN	NaN	NaN	NaN	NaN	NaN	NaN	NaN	NaN	NaN	NaN	NaN	NaN	NaN	NaN	NaN	NaN	NaN	NaN	NaN	NaN	NaN	NaN	NaN	NaN	NaN	NaN	NaN
-56.0503	NaN	NaN	NaN	NaN	NaN	NaN	NaN	NaN	NaN		NaN	NaN	NaN	NaN	NaN	NaN	NaN	NaN	NaN	NaN	NaN	NaN	NaN	NaN	NaN	NaN	NaN	NaN	NaN	NaN	NaN	NaN	NaN	NaN	NaN	NaN	NaN	NaN	NaN	NaN	NaN	NaN	NaN	NaN	NaN	NaN	NaN	NaN	NaN
-55.9535	NaN	NaN	NaN	NaN	NaN	NaN	NaN	NaN	NaN		NaN	NaN	NaN	NaN	NaN	NaN	NaN	NaN	NaN	NaN	NaN	NaN	NaN	NaN	NaN	NaN	NaN	NaN	NaN	NaN	NaN	NaN	NaN	NaN	NaN	NaN	NaN	NaN	NaN	NaN	NaN	NaN	NaN	NaN	NaN	NaN	NaN	NaN	NaN
-55.8567	NaN	NaN	NaN	NaN	NaN	NaN	NaN	NaN	NaN		NaN	NaN	NaN	NaN	NaN	NaN	NaN	NaN	NaN	NaN	NaN	NaN	NaN	NaN	NaN	NaN	NaN	NaN	NaN	NaN	NaN	NaN	NaN	NaN	NaN	NaN	NaN	NaN	NaN	NaN	NaN	NaN	NaN	NaN	NaN	NaN	NaN	NaN	NaN
-55.7599	NaN	NaN	NaN	NaN	NaN	NaN	NaN	NaN	NaN		NaN	NaN	NaN	NaN	NaN	NaN	NaN	NaN	NaN	NaN	NaN	NaN	NaN	NaN	NaN	NaN	NaN	NaN	NaN	NaN	NaN	NaN	NaN	NaN	NaN	NaN	NaN	NaN	NaN	NaN	NaN	NaN	NaN	NaN	NaN	NaN	NaN	NaN	NaN
-55.6631	NaN	NaN	NaN	NaN	NaN	NaN	NaN	NaN	NaN		NaN	NaN	NaN	NaN	NaN	NaN	NaN	NaN	NaN	NaN	NaN	NaN	NaN	NaN	NaN	NaN	NaN	NaN	NaN	NaN	NaN	NaN	NaN	NaN	NaN	NaN	NaN	NaN	NaN	NaN	NaN	NaN	NaN	NaN	NaN	NaN	NaN	NaN	NaN
-55.5663	NaN	NaN	NaN	NaN	NaN	NaN	NaN	NaN	NaN		NaN	NaN	NaN	NaN	NaN	NaN	NaN	NaN	NaN	NaN	NaN	NaN	NaN	NaN	NaN	NaN	NaN	NaN	NaN	NaN	NaN	NaN	NaN	NaN	NaN	NaN	NaN	NaN	0.372909	0.381355	0.204385	0.250164	NaN	NaN	NaN	NaN	NaN	NaN	NaN
-55.4695	NaN	NaN	NaN	NaN	NaN	NaN	NaN	NaN	NaN		NaN	NaN	NaN	NaN	NaN	NaN	NaN	NaN	NaN	NaN	NaN	NaN	NaN	NaN	NaN	NaN	NaN	NaN	NaN	NaN	NaN	NaN	NaN	NaN	NaN	NaN	NaN	NaN	0.755096	0.202293	0.648806	0.269336	NaN	NaN	NaN	NaN	NaN	NaN	NaN
-55.3727	NaN	NaN	NaN	NaN	NaN	NaN	NaN	NaN	NaN		NaN	NaN	NaN	NaN	NaN	NaN	NaN	NaN	NaN	NaN	NaN	NaN	NaN	NaN	NaN	NaN	NaN	NaN	NaN	NaN	NaN	NaN	NaN	NaN	NaN	NaN	NaN	NaN	0.373558	0.384362	0.467038	0.251424	NaN	NaN	NaN	NaN	NaN	NaN	NaN
-55.2759	NaN	NaN	NaN	NaN	NaN	NaN	NaN	NaN	NaN		NaN	NaN	NaN	NaN	NaN	NaN	NaN	NaN	NaN	NaN	NaN	NaN	NaN	NaN	NaN	NaN	NaN	NaN	NaN	NaN	NaN	NaN	NaN	NaN	NaN	NaN	NaN	NaN	0.301452	0.27509	0.382589	0.225668	NaN	NaN	NaN	NaN	NaN	NaN	NaN
-55.1791	NaN	NaN	NaN	NaN	NaN	NaN	NaN	NaN	NaN		NaN	NaN	NaN	NaN	NaN	NaN	NaN	NaN	NaN	NaN	NaN	NaN	NaN	NaN	NaN	NaN	NaN	NaN	NaN	NaN	NaN	NaN	NaN	NaN	NaN	NaN	NaN	NaN	0.345909	0.587812	0.271161	0.230593	NaN	NaN	NaN	NaN	NaN	NaN	NaN
-55.0823	NaN	NaN	NaN	NaN	NaN	NaN	NaN	NaN	NaN		NaN	NaN	NaN	NaN	NaN	NaN	NaN	NaN	NaN	NaN	NaN	NaN	NaN	NaN	NaN	NaN	NaN	NaN	NaN	NaN	NaN	NaN	NaN	NaN	NaN	NaN	NaN	NaN	0.589378	0.47254	0.258247	0.196386	NaN	NaN	NaN	NaN	NaN	NaN	NaN
-54.9855	NaN	NaN	NaN	NaN	NaN	NaN	NaN	NaN	NaN		NaN	NaN	NaN	NaN	NaN	NaN	NaN	NaN	NaN	NaN	NaN	NaN	NaN	NaN	NaN	NaN	NaN	NaN	NaN	NaN	NaN	NaN	NaN	NaN	NaN	NaN	NaN	NaN	0.427201	0.168967	0.267837	0.323115	NaN	NaN	NaN	NaN	NaN	NaN	NaN
-54.8887	NaN	NaN	NaN	NaN	NaN	NaN	NaN	NaN	NaN		NaN	NaN	NaN	NaN	NaN	NaN	NaN	NaN	NaN	NaN	NaN	NaN	NaN	NaN	NaN	NaN	NaN	NaN	NaN	NaN	NaN	NaN	NaN	NaN	NaN	NaN	NaN	NaN	0.417899	0.457103	0.309249	0.390127	NaN	NaN	NaN	NaN	NaN	NaN	NaN
-54.7919	NaN	NaN	NaN	NaN	NaN	NaN	NaN	NaN	NaN		NaN	NaN	NaN	NaN	NaN	NaN	NaN	NaN	NaN	NaN	NaN	NaN	NaN	NaN	NaN	NaN	NaN	NaN	NaN	NaN	NaN	NaN	NaN	NaN	NaN	NaN	NaN	NaN	0.138065	0.534636	0.295858	0.42483	NaN	NaN	NaN	NaN	NaN	NaN	NaN
-54.6951	NaN	NaN	NaN	NaN	NaN	NaN	NaN	NaN	NaN		NaN	NaN	NaN	NaN	NaN	NaN	NaN	NaN	NaN	NaN	NaN	NaN	NaN	NaN	NaN	NaN	NaN	NaN	NaN	NaN	NaN	NaN	NaN	NaN	NaN	NaN	NaN	NaN	0.609353	0.362826	0.699455	0.17749	NaN	NaN	NaN	NaN	NaN	NaN	NaN
-54.5983	NaN	NaN	NaN	NaN	NaN	NaN	NaN	NaN	NaN		NaN	NaN	NaN	NaN	NaN	NaN	NaN	NaN	NaN	NaN	NaN	NaN	NaN	NaN	NaN	NaN	NaN	NaN	NaN	NaN	NaN	NaN	NaN	NaN	NaN	NaN	NaN	NaN	0.623236	0.456407	0.41155	0.255435	NaN	NaN	NaN	NaN	NaN	NaN	NaN
-54.5015	NaN	NaN	NaN	NaN	NaN	NaN	NaN	NaN	NaN		NaN	NaN	NaN	NaN	NaN	NaN	NaN	NaN	NaN	NaN	NaN	NaN	NaN	NaN	NaN	NaN	NaN	NaN	NaN	NaN	NaN	NaN	NaN	NaN	NaN	NaN	NaN	NaN	0.578405	0.508029	0.353637	0.314673	NaN	NaN	NaN	NaN	NaN	NaN	NaN
-54.4046	NaN	NaN	NaN	NaN	NaN	NaN	NaN	NaN	NaN		NaN	NaN	NaN	NaN	NaN	NaN	NaN	NaN	NaN	NaN	NaN	NaN	NaN	NaN	NaN	NaN	NaN	NaN	NaN	NaN	NaN	NaN	NaN	NaN	NaN	NaN	NaN	NaN	0.387954	0.467826	0.571126	-0.139324	NaN	NaN	NaN	NaN	NaN	NaN	NaN
-54.3078	NaN	NaN	NaN	NaN	NaN	NaN	NaN	NaN	NaN		NaN	NaN	NaN	NaN	NaN	NaN	NaN	NaN	NaN	NaN	NaN	NaN	NaN	NaN	NaN	NaN	NaN	NaN	NaN	NaN	NaN	NaN	NaN	NaN	NaN	NaN	NaN	NaN	0.00370626	0.507203	0.191655	0.0381525	NaN	NaN	NaN	NaN	NaN	NaN	NaN
-54.211	NaN	NaN	NaN	NaN	NaN	NaN	NaN	NaN	NaN		NaN	NaN	NaN	NaN	NaN	NaN	NaN	NaN	NaN	NaN	NaN	NaN	NaN	NaN	NaN	NaN	NaN	NaN	NaN	NaN	NaN	NaN	NaN	NaN	NaN	NaN	NaN	NaN	-0.0907588	0.220476	0.339031	0.201123	NaN	NaN	NaN	NaN	NaN	NaN	NaN
-54.1142	NaN	NaN	NaN	NaN	NaN	NaN	NaN	NaN	NaN		NaN	NaN	NaN	NaN	NaN	NaN	NaN	NaN	NaN	NaN	NaN	NaN	NaN	NaN	NaN	NaN	NaN	NaN	NaN	NaN	NaN	NaN	NaN	NaN	NaN	NaN	NaN	NaN	0.226195	0.00893326	0.0254187	0.228885	NaN	NaN	NaN	NaN	NaN	NaN	NaN
-54.0174	NaN	NaN	NaN	NaN	NaN	NaN	NaN	NaN	NaN		NaN	NaN	NaN	NaN	NaN	NaN	NaN	NaN	NaN	NaN	NaN	NaN	NaN	NaN	NaN	NaN	NaN	NaN	NaN	NaN	NaN	NaN	NaN	NaN	NaN	NaN	NaN	NaN	0.0329991	0.0925213	0.341738	0.682574	NaN	NaN	NaN	NaN	NaN	NaN	NaN
-53.9206	NaN	NaN	NaN	NaN	NaN	NaN	NaN	NaN	NaN		NaN	NaN	NaN	NaN	NaN	NaN	NaN	NaN	NaN	NaN	NaN	NaN	NaN	NaN	NaN	NaN	NaN	NaN	NaN	NaN	NaN	NaN	NaN	NaN	NaN	NaN	NaN	NaN	0.218504	0.153021	0.25195	0.397614	NaN	NaN	NaN	NaN	NaN	NaN	NaN
-53.8238	NaN	NaN	NaN	NaN	NaN	NaN	NaN	NaN	NaN		NaN	NaN	NaN	NaN	NaN	NaN	NaN	NaN	NaN	NaN	NaN	NaN	NaN	NaN	NaN	NaN	NaN	NaN	NaN	NaN	NaN	NaN	NaN	NaN	NaN	NaN	NaN	NaN	0.434938	0.0707791	0.164322	0.145628	NaN	NaN	NaN	NaN	NaN	NaN	NaN
-53.727	NaN	NaN	NaN	NaN	NaN	NaN	NaN	NaN	NaN		NaN	NaN	NaN	NaN	NaN	NaN	NaN	NaN	NaN	NaN	NaN	NaN	NaN	NaN	NaN	NaN	NaN	NaN	NaN	NaN	NaN	NaN	NaN	NaN	NaN	NaN	NaN	NaN	0.300473	0.239935	0.473184	0.579518	NaN	NaN	NaN	NaN	NaN	NaN	NaN
-53.6302	NaN	NaN	NaN	NaN	NaN	NaN	NaN	NaN	NaN		NaN	NaN	NaN	NaN	NaN	NaN	NaN	NaN	NaN	NaN	NaN	NaN	NaN	NaN	NaN	NaN	NaN	NaN	NaN	NaN	NaN	NaN	NaN	NaN	NaN	NaN	NaN	NaN	0.362895	0.54024	0.560827	0.289508	NaN	NaN	NaN	NaN	NaN	NaN	NaN
-53.5334	NaN	NaN	NaN	NaN	NaN	NaN	NaN	NaN	NaN		NaN	NaN	NaN	NaN	NaN	NaN	NaN	NaN	NaN	NaN	NaN	NaN	NaN	NaN	NaN	NaN	NaN	NaN	NaN	NaN	NaN	NaN	NaN	NaN	NaN	NaN	NaN	NaN	0.478898	0.163818	0.490338	0.0987796	NaN	NaN	NaN	NaN	NaN	NaN	NaN
-53.4366	NaN	NaN	NaN	NaN	NaN	NaN	NaN	NaN	NaN		NaN	NaN	NaN	NaN	NaN	NaN	NaN	NaN	NaN	NaN	NaN	NaN	NaN	NaN	NaN	NaN	NaN	NaN	NaN	NaN	NaN	NaN	NaN	NaN	NaN	NaN	NaN	NaN	0.367616	0.298423	0.226053	0.16957	NaN	NaN	NaN	NaN	NaN	NaN	NaN
-53.3398	NaN	NaN	NaN	NaN	NaN	NaN	NaN	NaN	NaN		NaN	NaN	NaN	NaN	NaN	NaN	NaN	NaN	NaN	NaN	NaN	NaN	NaN	NaN	NaN	NaN	NaN	NaN	NaN	NaN	NaN	NaN	NaN	NaN	NaN	NaN	NaN	NaN	0.136454	0.151486	0.186935	0.191419	NaN	NaN	NaN	NaN	NaN	NaN	NaN
-53.243	NaN	NaN	NaN	NaN	NaN	NaN	NaN	NaN	NaN		NaN	NaN	NaN	NaN	NaN	NaN	NaN	NaN	NaN	NaN	NaN	NaN	NaN	NaN	NaN	NaN	NaN	NaN	NaN	NaN	NaN	NaN	NaN	NaN	NaN	NaN	NaN	NaN	0.49945	0.402609	0.315023	0.168872	NaN	NaN	NaN	NaN	NaN	NaN	NaN
-53.1462	NaN	NaN	NaN	NaN	NaN	NaN	NaN	NaN	NaN		NaN	NaN	NaN	NaN	NaN	NaN	NaN	NaN	NaN	NaN	NaN	NaN	NaN	NaN	NaN	NaN	NaN	NaN	NaN	NaN	NaN	NaN	NaN	NaN	NaN	NaN	NaN	NaN	0.437029	0.343763	0.325281	0.262536	NaN	NaN	NaN	NaN	NaN	NaN	NaN
-53.0494	NaN	NaN	NaN	NaN	NaN	NaN	NaN	NaN	NaN		NaN	NaN	NaN	NaN	NaN	NaN	NaN	NaN	NaN	NaN	NaN	NaN	NaN	NaN	NaN	NaN	NaN	NaN	NaN	NaN	NaN	NaN	NaN	NaN	NaN	NaN	NaN	NaN	0.343596	0.504607	0.632924	0.434417	NaN	NaN	NaN	NaN	NaN	NaN	NaN
-52.9526	NaN	NaN	NaN	NaN	NaN	NaN	NaN	NaN	NaN		NaN	NaN	NaN	NaN	NaN	NaN	NaN	NaN	NaN	NaN	NaN	NaN	NaN	NaN	NaN	NaN	NaN	NaN	NaN	NaN	NaN	NaN	NaN	NaN	NaN	NaN	NaN	NaN	0.519398	0.143407	0.48613	0.241744	NaN	NaN	NaN	NaN	NaN	NaN	NaN
-52.8558	NaN	NaN	NaN	NaN	NaN	NaN	NaN	NaN	NaN		NaN	NaN	NaN	NaN	NaN	NaN	NaN	NaN	NaN	NaN	NaN	NaN	NaN	NaN	NaN	NaN	NaN	NaN	NaN	NaN	NaN	NaN	NaN	NaN	NaN	NaN	NaN	NaN	0.484589	0.377395	0.474307	0.280139	NaN	NaN	NaN	NaN	NaN	NaN	NaN
-52.759	NaN	NaN	NaN	NaN	NaN	NaN	NaN	NaN	NaN		NaN	NaN	NaN	NaN	NaN	NaN	NaN	NaN	NaN	NaN	NaN	NaN	NaN	NaN	NaN	NaN	NaN	NaN	NaN	NaN	NaN	NaN	NaN	NaN	NaN	NaN	NaN	NaN	0.0897653	0.341469	0.517089	0.22135	NaN	NaN	NaN	NaN	NaN	NaN	NaN
-52.6621	NaN	NaN	NaN	NaN	NaN	NaN	NaN	NaN	NaN		NaN	NaN	NaN	NaN	NaN	NaN	NaN	NaN	NaN	NaN	NaN	NaN	NaN	NaN	NaN	NaN	NaN	NaN	NaN	NaN	NaN	NaN	NaN	NaN	NaN	NaN	NaN	NaN	0.281726	0.207702	0.376195	0.200688	NaN	NaN	NaN	NaN	NaN	NaN	NaN
-52.5653	NaN	NaN	NaN	NaN	NaN	NaN	NaN	NaN	NaN		NaN	NaN	NaN	NaN	NaN	NaN	NaN	NaN	NaN	NaN	NaN	NaN	NaN	NaN	NaN	NaN	NaN	NaN	NaN	NaN	NaN	NaN	NaN	NaN	NaN	NaN	NaN	NaN	0.181419	-0.0150298	0.267757	0.455438	NaN	NaN	NaN	NaN	NaN	NaN	NaN
-52.4685	NaN	NaN	NaN	NaN	NaN	NaN	NaN	NaN	NaN		NaN	NaN	NaN	NaN	NaN	NaN	NaN	NaN	NaN	NaN	NaN	NaN	NaN	NaN	NaN	NaN	NaN	NaN	NaN	NaN	NaN	NaN	NaN	NaN	NaN	NaN	NaN	NaN	0.278124	0.332099	0.118461	0.277418	NaN	NaN	NaN	NaN	NaN	NaN	NaN
-52.3717	NaN	NaN	NaN	NaN	NaN	NaN	NaN	NaN	NaN		NaN	NaN	NaN	NaN	NaN	NaN	NaN	NaN	NaN	NaN	NaN	NaN	NaN	NaN	NaN	NaN	NaN	NaN	NaN	NaN	NaN	NaN	NaN	NaN	NaN	NaN	NaN	NaN	0.234795	-0.0567053	0.0220494	0.0573047	NaN	NaN	NaN	NaN	NaN	NaN	NaN
-52.2749	NaN	NaN	NaN	NaN	NaN	NaN	NaN	NaN	NaN		NaN	NaN	NaN	NaN	NaN	NaN	NaN	NaN	NaN	NaN	NaN	NaN	NaN	NaN	NaN	NaN	NaN	NaN	NaN	NaN	NaN	NaN	NaN	NaN	NaN	NaN	NaN	NaN	0.334462	0.114205	-0.0193397	0.246789	NaN	NaN	NaN	NaN	NaN	NaN	NaN
-52.1781	NaN	NaN	NaN	NaN	NaN	NaN	NaN	NaN	NaN		NaN	NaN	NaN	NaN	NaN	NaN	NaN	NaN	NaN	NaN	NaN	NaN	NaN	NaN	NaN	NaN	NaN	NaN	NaN	NaN	NaN	NaN	NaN	NaN	NaN	NaN	NaN	NaN	0.0981512	-0.0539754	-0.0295975	0.113541	NaN	NaN	NaN	NaN	NaN	NaN	NaN
-52.0813	NaN	NaN	NaN	NaN	NaN	NaN	NaN	NaN	NaN		NaN	NaN	NaN	NaN	NaN	NaN	NaN	NaN	NaN	NaN	NaN	NaN	NaN	NaN	NaN	NaN	NaN	NaN	NaN	NaN	NaN	NaN	NaN	NaN	NaN	NaN	NaN	NaN	0.0971646	0.0985251	0.0779251	0.376236	NaN	NaN	NaN	NaN	NaN	NaN	NaN
-51.9845	NaN	NaN	NaN	NaN	NaN	NaN	NaN	NaN	NaN		NaN	NaN	NaN	NaN	NaN	NaN	NaN	NaN	NaN	NaN	NaN	NaN	NaN	NaN	NaN	NaN	NaN	NaN	NaN	NaN	NaN	NaN	NaN	NaN	NaN	NaN	NaN	NaN	0.110202	0.159127	0.118506	0.246039	NaN	NaN	NaN	NaN	NaN	NaN	NaN
-51.8877	NaN	NaN	NaN	NaN	NaN	NaN	NaN	NaN	NaN		NaN	NaN	NaN	NaN	NaN	NaN	NaN	NaN	NaN	NaN	NaN	NaN	NaN	NaN	NaN	NaN	NaN	NaN	NaN	NaN	NaN	NaN	NaN	NaN	NaN	NaN	NaN	NaN	0.337407	0.0960342	0.218754	0.159472	NaN	NaN	NaN	NaN	NaN	NaN	NaN
-51.7909	NaN	NaN	NaN	NaN	NaN	NaN	NaN	NaN	NaN		NaN	NaN	NaN	NaN	NaN	NaN	NaN	NaN	NaN	NaN	NaN	NaN	NaN	NaN	NaN	NaN	NaN	NaN	NaN	NaN	NaN	NaN	NaN	NaN	NaN	NaN	NaN	NaN	0.0284639	0.357075	0.130835	0.301964	NaN	NaN	NaN	NaN	NaN	NaN	NaN
-51.6941	NaN	NaN	NaN	NaN	NaN	NaN	NaN	NaN	NaN		NaN	NaN	NaN	NaN	NaN	NaN	NaN	NaN	NaN	NaN	NaN	NaN	NaN	NaN	NaN	NaN	NaN	NaN	NaN	NaN	NaN	NaN	NaN	NaN	NaN	NaN	NaN	NaN	0.245486	0.0346042	0.175824	0.251128	NaN	NaN	NaN	NaN	NaN	NaN	NaN
-51.5973	NaN	NaN	NaN	NaN	NaN	NaN	NaN	NaN	NaN		NaN	NaN	NaN	NaN	NaN	NaN	NaN	NaN	NaN	NaN	NaN	NaN	NaN	NaN	NaN	NaN	NaN	NaN	NaN	NaN	NaN	NaN	NaN	NaN	NaN	NaN	NaN	NaN	0.174269	0.0754811	-0.230529	-0.028766	NaN	NaN	NaN	NaN	NaN	NaN	NaN
-51.5005	NaN	NaN	NaN	NaN	NaN	NaN	NaN	NaN	NaN		NaN	NaN	NaN	NaN	NaN	NaN	NaN	NaN	NaN	NaN	NaN	NaN	NaN	NaN	NaN	NaN	NaN	NaN	NaN	NaN	NaN	NaN	NaN	NaN	NaN	NaN	NaN	NaN	0.172286	0.0557013	0.0499233	0.0773897	NaN	NaN	NaN	NaN	NaN	NaN	NaN
-51.4037	NaN	NaN	NaN	NaN	NaN	NaN	NaN	NaN	NaN		NaN	NaN	NaN	NaN	NaN	NaN	NaN	NaN	NaN	NaN	NaN	NaN	NaN	NaN	NaN	NaN	NaN	NaN	NaN	NaN	NaN	NaN	NaN	NaN	NaN	NaN	NaN	NaN	0.148416	0.218719	0.0905615	0.167189	NaN	NaN	NaN	NaN	NaN	NaN	NaN
-51.3069	NaN	NaN	NaN	NaN	NaN	NaN	NaN	NaN	NaN		NaN	NaN	NaN	NaN	NaN	NaN	NaN	NaN	NaN	NaN	NaN	NaN	NaN	NaN	NaN	NaN	NaN	NaN	NaN	NaN	NaN	NaN	NaN	NaN	NaN	NaN	NaN	NaN	0.4338	0.154349	-0.0659253	0.452559	NaN	NaN	NaN	NaN	NaN	NaN	NaN
-51.2101	NaN	NaN	NaN	NaN	NaN	NaN	NaN	NaN	NaN		NaN	NaN	NaN	NaN	NaN	NaN	NaN	NaN	NaN	NaN	NaN	NaN	NaN	NaN	NaN	NaN	NaN	NaN	NaN	NaN	NaN	NaN	NaN	NaN	NaN	NaN	NaN	NaN	0.309856	0.220624	0.187808	0.66714	NaN	NaN	NaN	NaN	NaN	NaN	NaN
-51.1133	NaN	NaN	NaN	NaN	NaN	NaN	NaN	NaN	NaN		NaN	NaN	NaN	NaN	NaN	NaN	NaN	NaN	NaN	NaN	NaN	NaN	NaN	NaN	NaN	NaN	NaN	NaN	NaN	NaN	NaN	NaN	NaN	NaN	NaN	NaN	NaN	NaN	0.438237	0.50003	0.272036	0.165827	NaN	NaN	NaN	NaN	NaN	NaN	NaN
-51.0165	NaN	NaN	NaN	NaN	NaN	NaN	NaN	NaN	NaN		NaN	NaN	NaN	NaN	NaN	NaN	NaN	NaN	NaN	NaN	NaN	NaN	NaN	NaN	NaN	NaN	NaN	NaN	NaN	NaN	NaN	NaN	NaN	NaN	NaN	NaN	NaN	NaN	0.441476	0.218724	0.339143	0.495265	NaN	NaN	NaN	NaN	NaN	NaN	NaN
-50.9197	NaN	NaN	NaN	NaN	NaN	NaN	NaN	NaN	NaN		NaN	NaN	NaN	NaN	NaN	NaN	NaN	NaN	NaN	NaN	NaN	NaN	NaN	NaN	NaN	NaN	NaN	NaN	NaN	NaN	NaN	NaN	NaN	NaN	NaN	NaN	NaN	NaN	0.549884	0.358127	0.738413	0.200911	NaN	NaN	NaN	NaN	NaN	NaN	NaN
-50.8228	NaN	NaN	NaN	NaN	NaN	NaN	NaN	NaN	NaN		NaN	NaN	NaN	NaN	NaN	NaN	NaN	NaN	NaN	NaN	NaN	NaN	NaN	NaN	NaN	NaN	NaN	NaN	NaN	NaN	NaN	NaN	NaN	NaN	NaN	NaN	NaN	NaN	0.4559	0.25947	0.620768	0.093288	NaN	NaN	NaN	NaN	NaN	NaN	NaN
-50.726	NaN	NaN	NaN	NaN	NaN	NaN	NaN	NaN	NaN		NaN	NaN	NaN	NaN	NaN	NaN	NaN	NaN	NaN	NaN	NaN	NaN	NaN	NaN	NaN	NaN	NaN	NaN	NaN	NaN	NaN	NaN	NaN	NaN	NaN	NaN	NaN	NaN	0.184497	0.322544	0.587833	0.701924	NaN	NaN	NaN	NaN	NaN	NaN	NaN
-50.6292	NaN	NaN	NaN	NaN	NaN	NaN	NaN	NaN	NaN		NaN	NaN	NaN	NaN	NaN	NaN	NaN	NaN	NaN	NaN	NaN	NaN	NaN	NaN	NaN	NaN	NaN	NaN	NaN	NaN	NaN	NaN	NaN	NaN	NaN	NaN	NaN	NaN	0.354383	0.457579	0.119487	0.554942	NaN	NaN	NaN	NaN	NaN	NaN	NaN
-50.5324	NaN	NaN	NaN	NaN	NaN	NaN	NaN	NaN	NaN		NaN	NaN	NaN	NaN	NaN	NaN	NaN	NaN	NaN	NaN	NaN	NaN	NaN	NaN	NaN	NaN	NaN	NaN	NaN	NaN	NaN	NaN	NaN	NaN	NaN	NaN	NaN	NaN	0.290645	0.16038	0.603775	0.373043	NaN	NaN	NaN	NaN	NaN	NaN	NaN
-50.4356	NaN	NaN	NaN	NaN	NaN	NaN	NaN	NaN	NaN		NaN	NaN	NaN	NaN	NaN	NaN	NaN	NaN	NaN	NaN	NaN	NaN	NaN	NaN	NaN	NaN	NaN	NaN	NaN	NaN	NaN	NaN	NaN	NaN	NaN	NaN	NaN	NaN	0.428011	0.0961143	0.568248	0.376844	NaN	NaN	NaN	NaN	NaN	NaN	NaN
-50.3388	NaN	NaN	NaN	NaN	NaN	NaN	NaN	NaN	NaN		NaN	NaN	NaN	NaN	NaN	NaN	NaN	NaN	NaN	NaN	NaN	NaN	NaN	NaN	NaN	NaN	NaN	NaN	NaN	NaN	NaN	NaN	NaN	NaN	NaN	NaN	NaN	NaN	0.260303	0.0572246	0.197519	0.484247	NaN	NaN	NaN	NaN	NaN	NaN	NaN
-50.242	NaN	NaN	NaN	NaN	NaN	NaN	NaN	NaN	NaN		NaN	NaN	NaN	NaN	NaN	NaN	NaN	NaN	NaN	NaN	NaN	NaN	NaN	NaN	NaN	NaN	NaN	NaN	NaN	NaN	NaN	NaN	NaN	NaN	NaN	NaN	NaN	NaN	0.159541	0.13206	0.126698	0.202109	NaN	NaN	NaN	NaN	NaN	NaN	NaN
-50.1452	NaN	NaN	NaN	NaN	NaN	NaN	NaN	NaN	NaN		NaN	NaN	NaN	NaN	NaN	NaN	NaN	NaN	NaN	NaN	NaN	NaN	NaN	NaN	NaN	NaN	NaN	NaN	NaN	NaN	NaN	NaN	NaN	NaN	NaN	NaN	NaN	NaN	0.232127	0.0960195	0.156562	0.502543	NaN	NaN	NaN	NaN	NaN	NaN	NaN
-50.0484	NaN	NaN	NaN	NaN	NaN	NaN	NaN	NaN	NaN		NaN	NaN	NaN	NaN	NaN	NaN	NaN	NaN	NaN	NaN	NaN	NaN	NaN	NaN	NaN	NaN	NaN	NaN	NaN	NaN	NaN	NaN	NaN	NaN	NaN	NaN	NaN	NaN	0.135663	0.125112	0.219737	0.538551	NaN	NaN	NaN	NaN	NaN	NaN	NaN
-49.9516	NaN	NaN	NaN	NaN	NaN	NaN	NaN	NaN	NaN		NaN	NaN	NaN	NaN	NaN	NaN	NaN	NaN	NaN	NaN	NaN	NaN	NaN	NaN	NaN	NaN	NaN	NaN	NaN	NaN	NaN	NaN	NaN	NaN	NaN	NaN	NaN	NaN	0.0941353	0.221777	0.320061	0.290085	NaN	NaN	NaN	NaN	NaN	NaN	NaN
-49.8548	NaN	NaN	NaN	NaN	NaN	NaN	NaN	NaN	NaN		NaN	NaN	NaN	NaN	NaN	NaN	NaN	NaN	NaN	NaN	NaN	NaN	NaN	NaN	NaN	NaN	NaN	NaN	NaN	NaN	NaN	NaN	NaN	NaN	NaN	NaN	NaN	NaN	0.32739	0.277078	0.445879	0.231604	NaN	NaN	NaN	NaN	NaN	NaN	NaN
-49.758	NaN	NaN	NaN	NaN	NaN	NaN	NaN	NaN	NaN		NaN	NaN	NaN	NaN	NaN	NaN	NaN	NaN	NaN	NaN	NaN	NaN	NaN	NaN	NaN	NaN	NaN	NaN	NaN	NaN	NaN	NaN	NaN	NaN	NaN	NaN	NaN	NaN	0.140956	0.304371	0.0293728	0.311172	NaN	NaN	NaN	NaN	NaN	NaN	NaN
-49.6612	NaN	NaN	NaN	NaN	NaN	NaN	NaN	NaN	NaN		NaN	NaN	NaN	NaN	NaN	NaN	NaN	NaN	NaN	NaN	NaN	NaN	NaN	NaN	NaN	NaN	NaN	NaN	NaN	NaN	NaN	NaN	NaN	NaN	NaN	NaN	NaN	NaN	0.212394	0.184291	-0.14743	0.550772	NaN	NaN	NaN	NaN	NaN	NaN	NaN
-49.5644	NaN	NaN	NaN	NaN	NaN	NaN	NaN	NaN	NaN		NaN	NaN	NaN	NaN	NaN	NaN	NaN	NaN	NaN	NaN	NaN	NaN	NaN	NaN	NaN	NaN	NaN	NaN	NaN	NaN	NaN	NaN	NaN	NaN	NaN	NaN	NaN	NaN	0.0392325	0.0377546	0.130056	0.395329	NaN	NaN	NaN	NaN	NaN	NaN	NaN
-49.4676	NaN	0.503657	NaN	NaN	NaN	NaN	NaN	NaN	NaN		NaN	NaN	NaN	NaN	NaN	NaN	NaN	NaN	NaN	NaN	NaN	NaN	NaN	NaN	NaN	NaN	NaN	NaN	NaN	NaN	NaN	NaN	NaN	NaN	NaN	NaN	NaN	NaN	0.325043	0.246297	-0.00583526	0.0583896	NaN	NaN	NaN	NaN	NaN	NaN	NaN
-49.3708	NaN	0.497278	NaN	NaN	NaN	NaN	NaN	NaN	NaN		NaN	NaN	NaN	NaN	NaN	NaN	NaN	NaN	NaN	NaN	NaN	NaN	NaN	NaN	NaN	NaN	NaN	NaN	NaN	NaN	NaN	NaN	NaN	NaN	NaN	NaN	NaN	NaN	0.297649	0.141913	0.422417	0.346584	NaN	NaN	NaN	NaN	NaN	NaN	NaN
-49.274	NaN	0.408734	NaN	NaN	NaN	NaN	NaN	NaN	NaN		NaN	NaN	NaN	NaN	NaN	NaN	NaN	NaN	NaN	NaN	NaN	NaN	NaN	NaN	NaN	NaN	NaN	NaN	NaN	NaN	NaN	NaN	NaN	NaN	NaN	NaN	NaN	NaN	0.301368	0.139644	0.294985	0.266774	NaN	NaN	NaN	NaN	NaN	NaN	NaN
-49.1772	NaN	0.413716	NaN	NaN	NaN	NaN	NaN	NaN	NaN		NaN	NaN	NaN	NaN	NaN	NaN	NaN	NaN	NaN	NaN	NaN	NaN	NaN	NaN	NaN	NaN	NaN	NaN	NaN	NaN	NaN	NaN	NaN	NaN	NaN	NaN	NaN	NaN	0.323044	0.424881	0.294581	0.271939	NaN	NaN	NaN	NaN	NaN	NaN	NaN
-49.0803	NaN	0.43694	NaN	NaN	NaN	NaN	NaN	NaN	NaN		NaN	NaN	NaN	NaN	NaN	NaN	NaN	NaN	NaN	NaN	NaN	NaN	NaN	NaN	NaN	NaN	NaN	NaN	NaN	NaN	NaN	NaN	NaN	NaN	NaN	NaN	NaN	NaN	0.611307	0.448597	0.563614	0.156233	NaN	NaN	NaN	NaN	NaN	NaN	NaN
-48.9835	NaN	0.480318	NaN	NaN	NaN	NaN	NaN	NaN	NaN		NaN	NaN	NaN	NaN	NaN	NaN	NaN	NaN	NaN	NaN	NaN	NaN	NaN	NaN	NaN	NaN	NaN	NaN	NaN	NaN	NaN	NaN	NaN	NaN	NaN	NaN	NaN	NaN	0.462601	0.444904	0.216636	0.132174	NaN	NaN	NaN	NaN	NaN	NaN	NaN
-48.8867	NaN	0.344114	NaN	NaN	NaN	NaN	NaN	NaN	NaN		NaN	NaN	NaN	NaN	NaN	NaN	NaN	NaN	NaN	NaN	NaN	NaN	NaN	NaN	NaN	NaN	NaN	NaN	NaN	NaN	NaN	NaN	NaN	NaN	NaN	NaN	NaN	NaN	0.442669	0.464639	0.464409	0.407137	NaN	NaN	NaN	NaN	NaN	NaN	NaN
-48.7899	NaN	0.429769	NaN	NaN	NaN	NaN	NaN	NaN	NaN		NaN	NaN	NaN	NaN	NaN	NaN	NaN	NaN	NaN	NaN	NaN	NaN	NaN	NaN	NaN	NaN	NaN	NaN	NaN	NaN	NaN	NaN	NaN	NaN	NaN	NaN	NaN	NaN	0.635411	0.439306	0.669421	0.283176	NaN	NaN	NaN	NaN	NaN	NaN	NaN
-48.6931	NaN	0.269206	NaN	NaN	NaN	NaN	NaN	NaN	NaN		NaN	NaN	NaN	NaN	NaN	NaN	NaN	NaN	NaN	NaN	NaN	NaN	NaN	NaN	NaN	NaN	NaN	NaN	NaN	NaN	NaN	NaN	NaN	NaN	NaN	NaN	NaN	NaN	0.262841	0.222509	0.551309	0.391741	NaN	NaN	NaN	NaN	NaN	NaN	NaN
-48.5963	NaN	0.433669	NaN	NaN	NaN	NaN	NaN	NaN	NaN		NaN	NaN	NaN	NaN	NaN	NaN	NaN	NaN	NaN	NaN	NaN	NaN	NaN	NaN	NaN	NaN	NaN	NaN	NaN	NaN	NaN	NaN	NaN	NaN	NaN	NaN	NaN	NaN	0.3684	0.27522	0.464211	0.40279	NaN	NaN	NaN	NaN	NaN	NaN	NaN
-48.4995	NaN	0.265807	NaN	NaN	NaN	NaN	NaN	NaN	NaN		NaN	NaN	NaN	NaN	NaN	NaN	NaN	NaN	NaN	NaN	NaN	NaN	NaN	NaN	NaN	NaN	NaN	NaN	NaN	NaN	NaN	NaN	NaN	NaN	NaN	NaN	NaN	NaN	0.534861	0.0663976	0.0378601	0.143352	NaN	NaN	NaN	NaN	NaN	NaN	NaN
-48.4027	NaN	0.270247	NaN	NaN	NaN	NaN	NaN	NaN	NaN		NaN	NaN	NaN	NaN	NaN	NaN	NaN	NaN	NaN	NaN	NaN	NaN	NaN	NaN	NaN	NaN	NaN	NaN	NaN	NaN	NaN	NaN	NaN	NaN	NaN	NaN	NaN	NaN	0.521655	0.207729	0.0635387	0.426744	NaN	NaN	NaN	NaN	NaN	NaN	NaN
-48.3059	NaN	0.417911	NaN	NaN	NaN	NaN	NaN	NaN	NaN		NaN	NaN	NaN	NaN	NaN	NaN	NaN	NaN	NaN	NaN	NaN	NaN	NaN	NaN	NaN	NaN	NaN	NaN	NaN	NaN	NaN	NaN	NaN	NaN	NaN	NaN	NaN	NaN	-0.0297293	0.24592	0.353887	0.857269	NaN	NaN	NaN	NaN	NaN	NaN	NaN
-48.2091	NaN	0.308416	NaN	NaN	NaN	NaN	NaN	NaN	NaN		NaN	NaN	NaN	NaN	NaN	NaN	NaN	NaN	NaN	NaN	NaN	NaN	NaN	NaN	NaN	NaN	NaN	NaN	NaN	NaN	NaN	NaN	NaN	NaN	NaN	NaN	NaN	NaN	-0.0127895	0.119651	0.144495	0.223896	NaN	NaN	NaN	NaN	NaN	NaN	NaN
-48.1123	NaN	0.309005	NaN	NaN	NaN	NaN	NaN	NaN	NaN		NaN	NaN	NaN	NaN	NaN	NaN	NaN	NaN	NaN	NaN	NaN	NaN	NaN	NaN	NaN	NaN	NaN	NaN	NaN	NaN	NaN	NaN	NaN	NaN	NaN	NaN	NaN	NaN	0.165536	0.176883	0.0643199	0.589935	NaN	NaN	NaN	NaN	NaN	NaN	NaN
-48.0155	NaN	0.325406	NaN	NaN	NaN	NaN	NaN	NaN	NaN		NaN	NaN	NaN	NaN	NaN	NaN	NaN	NaN	NaN	NaN	NaN	NaN	NaN	NaN	NaN	NaN	NaN	NaN	NaN	NaN	NaN	NaN	NaN	NaN	NaN	NaN	NaN	NaN	0.268473	0.0621922	0.239618	0.424977	NaN	NaN	NaN	NaN	NaN	NaN	NaN
-47.9187	NaN	0.242165	NaN	NaN	NaN	NaN	NaN	NaN	NaN		NaN	NaN	NaN	NaN	NaN	NaN	NaN	NaN	NaN	NaN	NaN	NaN	NaN	NaN	NaN	NaN	NaN	NaN	NaN	NaN	NaN	NaN	NaN	NaN	NaN	NaN	NaN	NaN	0.102666	0.132954	0.341897	0.217968	NaN	NaN	NaN	NaN	NaN	NaN	NaN
-47.8219	NaN	0.281895	NaN	NaN	NaN	NaN	NaN	NaN	NaN		NaN	NaN	NaN	NaN	NaN	NaN	NaN	NaN	NaN	NaN	NaN	NaN	NaN	NaN	NaN	NaN	NaN	NaN	NaN	NaN	NaN	NaN	NaN	NaN	NaN	NaN	NaN	NaN	0.0170079	0.229402	0.227095	0.350301	NaN	NaN	NaN	NaN	NaN	NaN	NaN
-47.7251	NaN	0.281578	NaN	NaN	NaN	NaN	NaN	NaN	NaN		NaN	NaN	NaN	NaN	NaN	NaN	NaN	NaN	NaN	NaN	NaN	NaN	NaN	NaN	NaN	NaN	NaN	NaN	NaN	NaN	NaN	NaN	NaN	NaN	NaN	NaN	NaN	NaN	0.410243	0.134205	0.247189	0.0380299	NaN	NaN	NaN	NaN	NaN	NaN	NaN
-47.6283	NaN	0.26314	NaN	NaN	NaN	NaN	NaN	NaN	NaN		NaN	NaN	NaN	NaN	NaN	NaN	NaN	NaN	NaN	NaN	NaN	NaN	NaN	NaN	NaN	NaN	NaN	NaN	NaN	NaN	NaN	NaN	NaN	NaN	NaN	NaN	NaN	NaN	0.494646	-0.0538225	0.235486	0.390365	NaN	NaN	NaN	NaN	NaN	NaN	NaN
-47.5315	NaN	0.296756	NaN	NaN	NaN	NaN	NaN	NaN	NaN		NaN	NaN	NaN	NaN	NaN	NaN	NaN	NaN	NaN	NaN	NaN	NaN	NaN	NaN	NaN	NaN	NaN	NaN	NaN	NaN	NaN	NaN	NaN	NaN	NaN	NaN	NaN	NaN	0.432816	-0.0566009	0.322694	0.25525	NaN	NaN	NaN	NaN	NaN	NaN	NaN
-47.4347	NaN	0.228706	NaN	NaN	NaN	NaN	NaN	NaN	NaN		NaN	NaN	NaN	NaN	NaN	NaN	NaN	NaN	NaN	NaN	NaN	NaN	NaN	NaN	NaN	NaN	NaN	NaN	NaN	NaN	NaN	NaN	NaN	NaN	NaN	NaN	NaN	NaN	0.379431	0.305508	0.127104	0.191282	NaN	NaN	NaN	NaN	NaN	NaN	NaN
-47.3379	NaN	0.189377	NaN	NaN	NaN	NaN	NaN	NaN	NaN		NaN	NaN	NaN	NaN	NaN	NaN	NaN	NaN	NaN	NaN	NaN	NaN	NaN	NaN	NaN	NaN	NaN	NaN	NaN	NaN	NaN	NaN	NaN	NaN	NaN	NaN	NaN	NaN	0.134198	0.17296	0.215457	0.0979373	NaN	NaN	NaN	NaN	NaN	NaN	NaN
-47.241	NaN	0.20553	NaN	NaN	NaN	NaN	NaN	NaN	NaN		NaN	NaN	NaN	NaN	NaN	NaN	NaN	NaN	NaN	NaN	NaN	NaN	NaN	NaN	NaN	NaN	NaN	NaN	NaN	NaN	NaN	NaN	NaN	NaN	NaN	NaN	NaN	NaN	0.281859	0.40048	0.147011	0.134145	NaN	NaN	NaN	NaN	NaN	NaN	NaN
-47.1442	NaN	0.256781	NaN	NaN	NaN	NaN	NaN	NaN	NaN		NaN	NaN	NaN	NaN	NaN	NaN	NaN	NaN	NaN	NaN	NaN	NaN	NaN	NaN	NaN	NaN	NaN	NaN	NaN	NaN	NaN	NaN	NaN	NaN	NaN	NaN	NaN	NaN	0.286899	0.248404	0.25157	0.204692	NaN	NaN	NaN	NaN	NaN	NaN	NaN
-47.0474	NaN	0.252888	NaN	NaN	NaN	NaN	NaN	NaN	NaN		NaN	NaN	NaN	NaN	NaN	NaN	NaN	NaN	NaN	NaN	NaN	NaN	NaN	NaN	NaN	NaN	NaN	NaN	NaN	NaN	NaN	NaN	NaN	NaN	NaN	NaN	NaN	NaN	0.00446846	0.387547	0.0766816	0.11905	NaN	NaN	NaN	NaN	NaN	NaN	NaN
-46.9506	NaN	0.29011	NaN	NaN	NaN	NaN	NaN	NaN	NaN		NaN	NaN	NaN	0.151283	0.151283	0.151283	0.151283	0.151283	0.151283	0.151283	0.151283	NaN	NaN	NaN	NaN	NaN	NaN	NaN	NaN	NaN	NaN	NaN	NaN	NaN	NaN	NaN	NaN	NaN	0.0826745	0.146771	0.102008	0.0903052	NaN	NaN	NaN	NaN	NaN	NaN	NaN
-46.8538	NaN	0.168286	NaN	NaN	NaN	NaN	NaN	NaN	NaN		NaN	NaN	NaN	0.225298	0.225298	0.225298	0.225298	0.225298	0.225298	0.225298	0.225298	NaN	NaN	NaN	NaN	NaN	NaN	NaN	NaN	NaN	NaN	NaN	NaN	NaN	NaN	NaN	NaN	NaN	0.186859	0.290593	0.149599	-0.022854	NaN	NaN	NaN	NaN	NaN	NaN	NaN
-46.757	NaN	0.163245	NaN	NaN	NaN	NaN	NaN	NaN	NaN		NaN	NaN	NaN	0.773098	0.773098	0.773098	0.773098	0.773098	0.773098	0.773098	0.773098	NaN	NaN	NaN	NaN	NaN	NaN	NaN	NaN	NaN	NaN	NaN	NaN	NaN	NaN	NaN	NaN	NaN	0.459476	0.283733	0.108926	0.378904	NaN	NaN	NaN	NaN	NaN	NaN	NaN
-46.6602	NaN	0.209758	NaN	NaN	NaN	NaN	NaN	NaN	NaN		NaN	NaN	NaN	0.225337	0.225337	0.225337	0.225337	0.225337	0.225337	0.225337	0.225337	NaN	NaN	NaN	NaN	NaN	NaN	NaN	NaN	NaN	NaN	NaN	NaN	NaN	NaN	NaN	NaN	NaN	0.190568	-0.0252476	0.172286	0.198387	NaN	NaN	NaN	NaN	NaN	NaN	NaN
-46.5634	NaN	0.160766	NaN	NaN	NaN	NaN	NaN	NaN	NaN		NaN	NaN	NaN	0.317706	0.317706	0.317706	0.317706	0.317706	0.317706	0.317706	0.317706	NaN	NaN	NaN	NaN	NaN	NaN	NaN	NaN	NaN	NaN	NaN	NaN	NaN	NaN	NaN	NaN	NaN	0.451242	0.588647	0.248144	0.330021	NaN	NaN	NaN	NaN	NaN	NaN	NaN
-46.4666	NaN	0.220095	NaN	NaN	NaN	NaN	NaN	NaN	NaN		NaN	NaN	NaN	0.626503	0.626503	0.626503	0.626503	0.626503	0.626503	0.626503	0.626503	NaN	NaN	NaN	NaN	NaN	NaN	NaN	NaN	NaN	NaN	NaN	NaN	NaN	NaN	NaN	NaN	NaN	0.141771	0.334695	0.357993	0.243689	NaN	NaN	NaN	NaN	NaN	NaN	NaN
-46.3698	NaN	0.128097	NaN	NaN	NaN	NaN	NaN	NaN	NaN		NaN	NaN	NaN	0.112578	0.112578	0.112578	0.112578	0.112578	0.112578	0.112578	0.112578	NaN	NaN	NaN	NaN	NaN	NaN	NaN	NaN	NaN	NaN	NaN	NaN	NaN	NaN	NaN	NaN	NaN	0.308414	0.245293	0.258155	0.432886	NaN	NaN	NaN	NaN	NaN	NaN	NaN
-46.273	NaN	0.20048	NaN	NaN	NaN	NaN	NaN	NaN	NaN		NaN	NaN	NaN	0.489736	0.489736	0.489736	0.489736	0.489736	0.489736	0.489736	0.489736	NaN	NaN	NaN	NaN	NaN	NaN	NaN	NaN	NaN	NaN	NaN	NaN	NaN	NaN	NaN	NaN	NaN	0.408589	0.429386	0.325737	0.0200828	NaN	NaN	NaN	NaN	NaN	NaN	NaN
-46.1762	NaN	0.0956889	NaN	NaN	NaN	NaN	NaN	NaN	NaN		NaN	NaN	NaN	0.195931	0.195931	0.195931	0.195931	0.195931	0.195931	0.195931	0.195931	NaN	NaN	NaN	NaN	NaN	NaN	NaN	NaN	NaN	NaN	NaN	NaN	NaN	NaN	NaN	NaN	NaN	0.333536	0.487114	0.109285	-0.0372673	NaN	NaN	NaN	NaN	NaN	NaN	NaN
-46.0794	NaN	0.18682	NaN	NaN	NaN	NaN	NaN	NaN	NaN		NaN	NaN	NaN	0.61145	0.402513	0.601664	0.42341	0.656119	0.680837	0.569227	0.463045	NaN	NaN	NaN	NaN	NaN	NaN	NaN	NaN	NaN	NaN	NaN	NaN	NaN	NaN	NaN	NaN	NaN	0.298985	0.253213	0.163313	0.374285	NaN	NaN	NaN	NaN	NaN	NaN	NaN
-45.9826	NaN	0.153791	NaN	NaN	NaN	NaN	NaN	NaN	NaN		NaN	NaN	NaN	0.451089	0.664312	0.421255	0.4831	0.624866	0.755383	0.384354	0.476517	NaN	NaN	NaN	NaN	NaN	NaN	NaN	NaN	NaN	NaN	NaN	NaN	NaN	NaN	NaN	NaN	NaN	0.604303	0.19433	0.427868	0.53564	NaN	NaN	NaN	NaN	NaN	NaN	NaN
-45.8858	NaN	0.168956	NaN	NaN	NaN	NaN	NaN	NaN	NaN		NaN	NaN	NaN	0.0858546	0.278965	0.209879	0.275993	0.205805	0.226888	0.323691	0.342178	NaN	NaN	NaN	NaN	NaN	NaN	NaN	NaN	NaN	NaN	NaN	NaN	NaN	NaN	NaN	NaN	NaN	0.757693	0.610371	0.792388	0.126613	NaN	NaN	NaN	NaN	NaN	NaN	NaN
-45.789	NaN	0.190351	NaN	NaN	NaN	NaN	NaN	NaN	NaN		NaN	NaN	NaN	0.441696	0.474632	0.469314	0.559458	0.301359	0.605714	0.612853	0.258361	NaN	NaN	NaN	NaN	NaN	NaN	NaN	NaN	NaN	NaN	NaN	NaN	NaN	NaN	NaN	NaN	NaN	0.464984	0.263468	0.649379	0.303325	NaN	NaN	NaN	NaN	NaN	NaN	NaN
-45.6922	NaN	0.255843	NaN	NaN	NaN	NaN	NaN	NaN	NaN		NaN	NaN	NaN	0.506851	0.510075	0.598806	0.429094	0.479712	0.409719	0.436208	0.473084	NaN	NaN	NaN	NaN	NaN	NaN	NaN	NaN	NaN	NaN	NaN	NaN	NaN	NaN	NaN	NaN	NaN	0.604339	0.38521	0.51756	0.0676386	NaN	NaN	NaN	NaN	NaN	NaN	NaN
-45.5954	NaN	0.281599	NaN	NaN	NaN	NaN	NaN	NaN	NaN		NaN	NaN	NaN	0.417053	0.546234	0.469676	0.366496	0.535588	0.591359	0.405595	0.498086	NaN	NaN	NaN	NaN	NaN	NaN	NaN	NaN	NaN	NaN	NaN	NaN	NaN	NaN	NaN	NaN	NaN	0.486883	0.435033	0.263797	0.266498	NaN	NaN	NaN	NaN	NaN	NaN	NaN
-45.4985	NaN	0.381882	NaN	NaN	NaN	NaN	NaN	NaN	NaN		NaN	NaN	NaN	0.438345	0.374757	0.35558	0.394597	0.322799	0.251013	0.53196	0.345354	NaN	NaN	NaN	NaN	NaN	NaN	NaN	NaN	NaN	NaN	NaN	NaN	NaN	NaN	NaN	NaN	NaN	0.422269	0.683811	0.751658	0.433818	NaN	NaN	NaN	NaN	NaN	NaN	NaN
-45.4017	NaN	0.440869	NaN	NaN	NaN	NaN	NaN	NaN	NaN		NaN	NaN	NaN	0.356392	0.439414	0.611112	0.494538	0.217361	0.558235	0.262579	0.313987	NaN	NaN	NaN	NaN	NaN	NaN	NaN	NaN	NaN	NaN	NaN	NaN	NaN	NaN	NaN	NaN	NaN	0.462922	0.380755	0.280548	0.400565	NaN	NaN	NaN	NaN	NaN	NaN	NaN
-45.3049	NaN	0.357109	NaN	NaN	NaN	NaN	NaN	NaN	NaN		NaN	NaN	NaN	0.498733	0.469755	0.384128	0.407882	0.596694	0.765326	0.423202	0.367873	NaN	NaN	NaN	NaN	NaN	NaN	NaN	NaN	NaN	NaN	NaN	NaN	NaN	NaN	NaN	NaN	NaN	0.35756	0.257988	0.40256	0.338688	NaN	NaN	NaN	NaN	NaN	NaN	NaN
-45.2081	NaN	0.366149	NaN	NaN	NaN	NaN	NaN	NaN	NaN		NaN	NaN	NaN	0.551467	0.549755	0.523989	0.637718	0.470223	0.3968	0.484827	0.450625	NaN	NaN	NaN	NaN	NaN	NaN	NaN	NaN	NaN	NaN	NaN	NaN	NaN	NaN	NaN	NaN	NaN	1.06513	0.559003	0.5422	0.45413	NaN	NaN	NaN	NaN	NaN	NaN	NaN
-45.1113	NaN	0.378332	NaN	NaN	NaN	NaN	NaN	NaN	NaN		NaN	NaN	NaN	0.0756783	0.367351	0.144684	0.297915	0.37064	0.244791	0.227893	0.292592	NaN	NaN	NaN	NaN	NaN	NaN	NaN	NaN	NaN	NaN	NaN	NaN	NaN	NaN	NaN	NaN	NaN	0.504823	0.648428	0.60904	0.571998	NaN	NaN	NaN	NaN	NaN	NaN	NaN
-45.0145	NaN	0.300687	NaN	NaN	NaN	NaN	NaN	NaN	NaN		NaN	NaN	NaN	0.161656	0.213065	0.196588	0.307613	0.236704	0.232554	0.188775	0.157395	NaN	NaN	NaN	NaN	NaN	NaN	NaN	NaN	NaN	NaN	NaN	NaN	NaN	NaN	NaN	NaN	NaN	0.506203	0.444583	0.238855	0.641631	NaN	NaN	NaN	NaN	NaN	NaN	NaN
-44.9177	NaN	0.300619	NaN	NaN	NaN	NaN	NaN	NaN	NaN		NaN	NaN	NaN	0.31098	0.351431	0.299827	0.333391	0.23969	0.448598	0.442559	0.469444	NaN	NaN	NaN	NaN	NaN	NaN	NaN	NaN	NaN	NaN	NaN	NaN	NaN	NaN	NaN	NaN	NaN	0.45171	0.47646	0.614939	0.465102	NaN	NaN	NaN	NaN	NaN	NaN	NaN
-44.8209	NaN	0.268975	NaN	NaN	NaN	NaN	NaN	NaN	NaN		NaN	NaN	NaN	0.602025	0.523791	0.627999	0.450041	0.469381	0.500075	0.403333	0.561022	NaN	NaN	NaN	NaN	NaN	NaN	NaN	NaN	NaN	NaN	NaN	NaN	NaN	NaN	NaN	NaN	NaN	0.217779	0.2776	0.205748	0.430885	NaN	NaN	NaN	NaN	NaN	NaN	NaN
-44.7241	NaN	0.292923	NaN	NaN	NaN	NaN	NaN	NaN	NaN		NaN	NaN	NaN	0.64039	0.624147	0.639757	0.401693	0.49714	0.622978	0.507269	0.474817	NaN	NaN	NaN	NaN	NaN	NaN	NaN	NaN	NaN	NaN	NaN	NaN	NaN	NaN	NaN	NaN	NaN	0.518094	0.69266	0.575431	0.38741	NaN	NaN	NaN	NaN	NaN	NaN	NaN
-44.6273	NaN	0.236397	NaN	NaN	NaN	NaN	NaN	NaN	NaN		NaN	NaN	NaN	0.365955	0.460759	0.319507	0.417445	0.498533	0.384079	0.362094	0.387649	NaN	NaN	NaN	NaN	NaN	NaN	NaN	NaN	NaN	NaN	NaN	NaN	NaN	NaN	NaN	NaN	NaN	0.657734	0.899019	0.67078	0.657983	NaN	NaN	NaN	NaN	NaN	NaN	NaN
-44.5305	NaN	0.265272	NaN	NaN	NaN	NaN	NaN	NaN	NaN		NaN	NaN	NaN	0.690027	0.595588	0.529486	0.616883	0.405941	0.59667	0.543756	0.591127	NaN	NaN	NaN	NaN	NaN	NaN	NaN	NaN	NaN	NaN	NaN	NaN	NaN	NaN	NaN	NaN	NaN	0.382866	0.734329	0.609975	0.606013	NaN	NaN	NaN	NaN	NaN	NaN	NaN
-44.4337	NaN	0.225906	NaN	NaN	NaN	NaN	NaN	NaN	NaN		NaN	NaN	NaN	0.415048	0.300561	0.387186	0.496544	0.423117	0.349115	0.433264	0.305259	NaN	NaN	NaN	NaN	NaN	NaN	NaN	NaN	NaN	NaN	NaN	NaN	NaN	NaN	NaN	NaN	NaN	0.952967	0.673817	0.549253	0.561512	NaN	NaN	NaN	NaN	NaN	NaN	NaN
-44.3369	NaN	0.28228	NaN	NaN	NaN	NaN	NaN	NaN	NaN		NaN	NaN	NaN	0.409877	0.52608	0.350437	0.387936	0.530881	0.488939	0.405226	0.423561	NaN	NaN	NaN	NaN	NaN	NaN	NaN	NaN	NaN	NaN	NaN	NaN	NaN	NaN	NaN	NaN	NaN	0.598876	0.770541	0.44953	0.355732	NaN	NaN	NaN	NaN	NaN	NaN	NaN
-44.2401	NaN	0.240808	NaN	NaN	NaN	NaN	NaN	NaN	NaN		NaN	NaN	NaN	0.54725	0.528246	0.446875	0.364865	0.466202	0.421073	0.352819	0.505119	NaN	NaN	NaN	NaN	NaN	NaN	NaN	NaN	NaN	NaN	NaN	NaN	NaN	NaN	NaN	NaN	NaN	0.543701	0.362244	0.411625	0.4662	NaN	NaN	NaN	NaN	NaN	NaN	NaN
-44.1433	NaN	0.327569	NaN	NaN	NaN	NaN	NaN	NaN	NaN		NaN	NaN	NaN	0.545535	0.330292	0.426436	0.342359	0.537569	0.313984	0.541918	0.438676	NaN	NaN	NaN	NaN	NaN	NaN	NaN	NaN	NaN	NaN	NaN	NaN	NaN	NaN	NaN	NaN	NaN	0.480533	0.8962	0.394195	0.712249	NaN	NaN	NaN	NaN	NaN	NaN	NaN
-44.0465	NaN	0.375806	NaN	NaN	NaN	NaN	NaN	NaN	NaN		NaN	NaN	NaN	0.413954	0.349034	0.387803	0.313896	0.366968	0.288343	0.310694	0.387028	NaN	NaN	NaN	NaN	NaN	NaN	NaN	NaN	NaN	NaN	NaN	NaN	NaN	NaN	NaN	NaN	NaN	0.50994	0.487649	0.590432	0.663242	NaN	NaN	NaN	NaN	NaN	NaN	NaN
-43.9497	NaN	0.472311	NaN	NaN	NaN	NaN	NaN	NaN	NaN		NaN	NaN	NaN	0.859978	0.628524	0.612675	0.664158	0.602351	0.590111	0.694414	0.640401	NaN	NaN	NaN	NaN	NaN	NaN	NaN	NaN	NaN	NaN	NaN	NaN	NaN	NaN	NaN	NaN	NaN	0.688699	0.357278	0.619569	0.425709	NaN	NaN	NaN	NaN	NaN	NaN	NaN
-43.8529	NaN	0.551986	NaN	NaN	NaN	NaN	NaN	NaN	NaN		NaN	NaN	NaN	1.01675	0.808232	0.570669	0.783702	0.765301	0.707671	0.752321	0.840191	NaN	NaN	NaN	NaN	NaN	NaN	NaN	NaN	NaN	NaN	NaN	NaN	NaN	NaN	NaN	NaN	NaN	0.739834	0.717966	0.652185	0.251921	NaN	NaN	NaN	NaN	NaN	NaN	NaN
-43.7561	NaN	0.625334	NaN	NaN	NaN	NaN	NaN	NaN	NaN		NaN	NaN	NaN	0.587868	0.497911	0.372572	0.436987	0.286088	0.396814	0.504376	0.604594	NaN	NaN	NaN	NaN	NaN	NaN	NaN	NaN	NaN	NaN	NaN	NaN	NaN	NaN	NaN	NaN	NaN	0.669837	0.673761	0.711676	0.52567	NaN	NaN	NaN	NaN	NaN	NaN	NaN
-43.6592	NaN	0.580898	NaN	NaN	NaN	NaN	NaN	NaN	NaN		NaN	NaN	NaN	0.6057	0.543957	0.482215	0.601916	0.439597	0.420549	0.46851	0.546339	NaN	NaN	NaN	NaN	NaN	NaN	NaN	NaN	NaN	NaN	NaN	NaN	NaN	NaN	NaN	NaN	NaN	0.309609	0.502346	0.112712	0.894815	NaN	NaN	NaN	NaN	NaN	NaN	NaN
-43.5624	NaN	0.481313	NaN	NaN	NaN	NaN	NaN	NaN	NaN		NaN	NaN	NaN	0.548027	0.475562	0.448454	0.343764	0.529751	0.429991	0.530665	0.402259	NaN	NaN	NaN	NaN	NaN	NaN	NaN	NaN	NaN	NaN	NaN	NaN	NaN	NaN	NaN	NaN	NaN	0.577969	0.48154	0.555167	0.657395	NaN	NaN	NaN	NaN	NaN	NaN	NaN
-43.4656	NaN	0.492408	NaN	NaN	NaN	NaN	NaN	NaN	NaN		NaN	NaN	NaN	0.554723	0.427451	0.37522	0.469893	0.496826	0.692767	0.514938	0.462404	NaN	NaN	NaN	NaN	NaN	NaN	NaN	NaN	NaN	NaN	NaN	NaN	NaN	NaN	NaN	NaN	NaN	0.805588	0.322079	0.435227	0.400678	NaN	NaN	NaN	NaN	NaN	NaN	NaN
-43.3688	NaN	0.453321	NaN	NaN	NaN	NaN	NaN	NaN	NaN		NaN	NaN	NaN	0.336527	0.31856	0.231679	0.426971	0.29056	0.455381	0.543176	0.2452	NaN	NaN	NaN	NaN	NaN	NaN	NaN	NaN	NaN	NaN	NaN	NaN	NaN	NaN	NaN	NaN	NaN	0.298383	0.489848	0.157324	0.396962	NaN	NaN	NaN	NaN	NaN	NaN	NaN
-43.272	NaN	0.490417	NaN	NaN	NaN	NaN	NaN	NaN	NaN		NaN	NaN	NaN	0.745255	0.572829	0.507533	0.566679	0.606063	0.426493	0.719042	0.529481	NaN	NaN	NaN	NaN	NaN	NaN	NaN	NaN	NaN	NaN	NaN	NaN	NaN	NaN	NaN	NaN	NaN	0.393917	0.402694	0.0886377	0.599608	NaN	NaN	NaN	NaN	NaN	NaN	NaN
-43.1752	NaN	0.496541	NaN	NaN	NaN	NaN	NaN	NaN	NaN		NaN	NaN	NaN	1.02839	0.674454	0.7002	0.625012	0.928553	0.530545	0.805042	0.735506	NaN	NaN	NaN	NaN	NaN	NaN	NaN	NaN	NaN	NaN	NaN	NaN	NaN	NaN	NaN	NaN	NaN	0.254189	0.278856	0.340979	0.327177	NaN	NaN	NaN	NaN	NaN	NaN	NaN
-43.0784	NaN	0.419817	NaN	NaN	NaN	NaN	NaN	NaN	NaN		NaN	NaN	NaN	0.725681	0.627069	0.610122	0.518047	0.503367	0.443533	0.530817	0.558332	NaN	NaN	NaN	NaN	NaN	NaN	NaN	NaN	NaN	NaN	NaN	NaN	NaN	NaN	NaN	NaN	NaN	0.0508498	0.181753	0.257721	0.186218	NaN	NaN	NaN	NaN	NaN	NaN	NaN
-42.9816	NaN	0.393787	NaN	NaN	NaN	NaN	NaN	NaN	NaN		NaN	NaN	NaN	0.702027	0.505957	0.529201	0.513878	0.376092	0.426743	0.534971	0.373119	NaN	NaN	NaN	NaN	NaN	NaN	NaN	NaN	NaN	NaN	NaN	NaN	NaN	NaN	NaN	NaN	NaN	0.356364	0.206591	0.174872	0.225418	NaN	NaN	NaN	NaN	NaN	NaN	NaN
-42.8848	NaN	0.348254	NaN	NaN	NaN	NaN	NaN	NaN	NaN		NaN	NaN	NaN	0.431924	0.223839	0.276686	0.439649	0.356302	0.40466	0.363379	0.30851	NaN	NaN	NaN	NaN	NaN	NaN	NaN	NaN	NaN	NaN	NaN	NaN	NaN	NaN	NaN	NaN	NaN	0.0500705	0.219431	0.253158	0.258305	NaN	NaN	NaN	NaN	NaN	NaN	NaN
-42.788	NaN	0.335779	NaN	NaN	NaN	NaN	NaN	NaN	NaN		NaN	NaN	NaN	0.438916	0.307361	0.409313	0.347325	0.282574	0.326844	0.323637	0.347158	NaN	NaN	NaN	NaN	NaN	NaN	NaN	NaN	NaN	NaN	NaN	NaN	NaN	NaN	NaN	NaN	NaN	0.0839575	0.246269	0.461068	0.324214	NaN	NaN	NaN	NaN	NaN	NaN	NaN
-42.6912	NaN	0.455475	NaN	NaN	NaN	NaN	NaN	NaN	NaN		NaN	NaN	NaN	0.511683	0.493887	0.328662	0.491117	0.403797	0.517215	0.277959	0.429572	NaN	NaN	NaN	NaN	NaN	NaN	NaN	NaN	NaN	NaN	NaN	NaN	NaN	NaN	NaN	NaN	NaN	0.465763	0.25787	0.589603	0.27679	NaN	NaN	NaN	NaN	NaN	NaN	NaN
-42.5944	NaN	0.404275	NaN	NaN	NaN	NaN	NaN	NaN	NaN		NaN	NaN	NaN	0.496332	0.442931	0.442186	0.35885	0.314312	0.470525	0.489598	0.528796	NaN	NaN	NaN	NaN	NaN	NaN	NaN	NaN	NaN	NaN	NaN	NaN	NaN	NaN	NaN	NaN	NaN	0.299799	0.491251	0.333755	0.299822	NaN	NaN	NaN	NaN	NaN	NaN	NaN
-42.4976	NaN	0.455511	NaN	NaN	NaN	NaN	NaN	NaN	NaN		NaN	NaN	NaN	0.631052	0.462068	0.525266	0.513271	0.43147	0.46322	0.523153	0.487252	NaN	NaN	NaN	NaN	NaN	NaN	NaN	NaN	NaN	NaN	NaN	NaN	NaN	NaN	NaN	NaN	NaN	0.205746	0.459825	0.238963	0.323656	NaN	NaN	NaN	NaN	NaN	NaN	NaN
-42.4008	NaN	0.377222	NaN	NaN	NaN	NaN	NaN	NaN	NaN		NaN	NaN	NaN	0.774409	0.709723	0.538954	0.507208	0.576846	0.692259	0.581264	0.585785	NaN	NaN	NaN	NaN	NaN	NaN	NaN	NaN	NaN	NaN	NaN	NaN	NaN	NaN	NaN	NaN	NaN	0.828763	0.37659	0.44654	0.310267	NaN	NaN	NaN	NaN	NaN	NaN	NaN
-42.304	NaN	0.397346	NaN	NaN	NaN	NaN	NaN	NaN	NaN		NaN	NaN	NaN	0.712934	0.745851	0.511635	0.59637	0.560273	0.555345	0.606296	0.513478	NaN	NaN	NaN	NaN	NaN	NaN	NaN	NaN	NaN	NaN	NaN	NaN	NaN	NaN	NaN	NaN	NaN	0.507689	0.436426	0.287594	0.54383	NaN	NaN	NaN	NaN	NaN	NaN	NaN
-42.2072	NaN	0.345449	NaN	NaN	NaN	NaN	NaN	NaN	NaN		NaN	NaN	NaN	0.736093	0.694521	0.446927	0.544193	0.528832	0.431363	0.765639	0.565048	NaN	NaN	NaN	NaN	NaN	NaN	NaN	NaN	NaN	NaN	NaN	NaN	NaN	NaN	NaN	NaN	NaN	0.294025	0.355925	0.509404	0.325705	NaN	NaN	NaN	NaN	NaN	NaN	NaN
-42.1104	NaN	0.305948	NaN	NaN	NaN	NaN	NaN	NaN	NaN		NaN	NaN	NaN	0.887964	0.842661	0.613899	0.727538	0.56586	0.726119	0.647902	0.575956	NaN	NaN	NaN	NaN	NaN	NaN	NaN	NaN	NaN	NaN	NaN	NaN	NaN	NaN	NaN	NaN	NaN	0.0199197	0.645124	0.587254	0.311028	NaN	NaN	NaN	NaN	NaN	NaN	NaN
-42.0136	NaN	0.347976	NaN	NaN	NaN	NaN	NaN	NaN	NaN		NaN	NaN	NaN	0.581701	0.588692	0.499988	0.442727	0.44898	0.658801	0.44067	0.379197	NaN	NaN	NaN	NaN	NaN	NaN	NaN	NaN	NaN	NaN	NaN	NaN	NaN	NaN	NaN	NaN	NaN	0.429398	0.412632	0.690762	0.656755	NaN	NaN	NaN	NaN	NaN	NaN	NaN
-41.9167	NaN	0.330374	NaN	NaN	NaN	NaN	NaN	NaN	NaN		NaN	NaN	NaN	0.437341	0.418378	0.415266	0.357018	0.241604	0.346378	0.470205	0.245679	NaN	NaN	NaN	NaN	NaN	NaN	NaN	NaN	NaN	NaN	NaN	NaN	NaN	NaN	NaN	NaN	NaN	0.275502	0.56136	0.746637	0.505695	NaN	NaN	NaN	NaN	NaN	NaN	NaN
-41.8199	NaN	0.325079	NaN	NaN	NaN	NaN	NaN	NaN	NaN		NaN	NaN	NaN	0.44936	0.383889	0.32249	0.223386	0.370649	0.336679	0.395977	0.407019	NaN	NaN	NaN	NaN	NaN	NaN	NaN	NaN	NaN	NaN	NaN	NaN	NaN	NaN	NaN	NaN	NaN	0.626874	0.503094	0.515111	1.00147	NaN	NaN	NaN	NaN	NaN	NaN	NaN
-41.7231	NaN	0.325019	NaN	NaN	NaN	NaN	NaN	NaN	NaN		NaN	NaN	NaN	0.611456	0.501811	0.276903	0.568079	0.404814	0.572874	0.666858	0.522798	NaN	NaN	NaN	NaN	NaN	NaN	NaN	NaN	NaN	NaN	NaN	NaN	NaN	NaN	NaN	NaN	NaN	0.624944	0.527711	0.577827	0.541903	NaN	NaN	NaN	NaN	NaN	NaN	NaN
-41.6263	NaN	0.331188	NaN	NaN	NaN	NaN	NaN	NaN	NaN		NaN	NaN	NaN	0.316329	0.310849	0.225736	0.276549	0.379106	0.216346	0.28857	0.302001	NaN	NaN	NaN	NaN	NaN	NaN	NaN	NaN	NaN	NaN	NaN	NaN	NaN	NaN	NaN	NaN	NaN	0.362694	0.566534	0.586	0.452334	NaN	NaN	NaN	NaN	NaN	NaN	NaN
-41.5295	NaN	0.331084	NaN	NaN	NaN	NaN	NaN	NaN	NaN		NaN	NaN	NaN	0.352926	0.314128	0.426361	0.395519	0.294523	0.303404	0.387955	0.290955	NaN	NaN	NaN	NaN	NaN	NaN	NaN	NaN	NaN	NaN	NaN	NaN	NaN	NaN	NaN	NaN	NaN	0.344349	0.711071	0.633236	0.428865	NaN	NaN	NaN	NaN	NaN	NaN	NaN
-41.4327	NaN	0.302862	NaN	NaN	NaN	NaN	NaN	NaN	NaN		NaN	NaN	NaN	0.166125	0.165937	0.248672	0.211837	0.494742	0.310839	0.433669	0.218132	NaN	NaN	NaN	NaN	NaN	NaN	NaN	NaN	NaN	NaN	NaN	NaN	NaN	NaN	NaN	NaN	NaN	0.558215	0.227294	0.518964	0.65236	NaN	NaN	NaN	NaN	NaN	NaN	NaN
-41.3359	NaN	0.271362	NaN	NaN	NaN	NaN	NaN	NaN	NaN		NaN	NaN	NaN	0.181098	0.181321	0.156605	0.160956	0.131465	0.30762	0.258725	0.250405	NaN	NaN	NaN	NaN	NaN	NaN	NaN	NaN	NaN	NaN	NaN	NaN	NaN	NaN	NaN	NaN	NaN	0.530791	0.600012	0.726727	0.667595	NaN	NaN	NaN	NaN	NaN	NaN	NaN
-41.2391	NaN	0.297025	NaN	NaN	NaN	NaN	NaN	NaN	NaN		NaN	NaN	NaN	0.250377	0.339787	0.152111	0.429132	0.34103	0.264632	0.305022	0.257756	NaN	NaN	NaN	NaN	NaN	NaN	NaN	NaN	NaN	NaN	NaN	NaN	NaN	NaN	NaN	NaN	NaN	0.529217	0.52717	0.5804	0.637702	NaN	NaN	NaN	NaN	NaN	NaN	NaN
-41.1423	NaN	0.289581	NaN	NaN	NaN	NaN	NaN	NaN	NaN		NaN	NaN	NaN	0.390129	0.398842	0.236057	0.301207	0.373273	0.508105	0.446097	0.229701	NaN	NaN	NaN	NaN	NaN	NaN	NaN	NaN	NaN	NaN	NaN	NaN	NaN	NaN	NaN	NaN	NaN	0.591253	0.57676	0.668298	0.616671	NaN	NaN	NaN	NaN	NaN	NaN	NaN
-41.0455	NaN	0.308458	NaN	NaN	NaN	NaN	NaN	NaN	NaN		NaN	NaN	NaN	0.195388	0.184777	0.13818	0.311731	0.140867	0.281431	0.125485	0.321081	NaN	NaN	NaN	NaN	NaN	NaN	NaN	NaN	NaN	NaN	NaN	NaN	NaN	NaN	NaN	NaN	NaN	0.413548	0.286055	0.315835	0.427424	NaN	NaN	NaN	NaN	NaN	NaN	NaN
-40.9487	NaN	0.275733	NaN	NaN	NaN	NaN	NaN	NaN	NaN		NaN	NaN	NaN	0.390527	0.174059	0.335807	0.294307	0.350721	0.337266	0.401612	0.49713	NaN	NaN	NaN	NaN	NaN	NaN	NaN	NaN	NaN	NaN	NaN	NaN	NaN	NaN	NaN	NaN	NaN	0.714873	0.624685	0.569079	0.576565	NaN	NaN	NaN	NaN	NaN	NaN	NaN
-40.8519	NaN	0.280647	NaN	NaN	NaN	NaN	NaN	NaN	NaN		NaN	NaN	NaN	0.45702	0.616927	0.266756	0.372573	0.328538	0.375433	0.446632	0.294862	NaN	NaN	NaN	NaN	NaN	NaN	NaN	NaN	NaN	NaN	NaN	NaN	NaN	NaN	NaN	NaN	0.153123	0.301092	0.440407	0.454533	0.488155	NaN	NaN	NaN	NaN	NaN	NaN	NaN
-40.7551	NaN	0.268923	NaN	NaN	NaN	NaN	NaN	NaN	NaN		NaN	NaN	NaN	0.394014	0.52311	0.308823	0.270379	0.395097	0.453584	0.406768	0.472238	NaN	NaN	NaN	NaN	NaN	NaN	NaN	NaN	NaN	NaN	NaN	NaN	NaN	NaN	NaN	NaN	0.289743	0.221844	0.387841	0.43042	0.361902	NaN	NaN	NaN	NaN	NaN	NaN	NaN
-40.6583	NaN	0.261052	NaN	NaN	NaN	NaN	NaN	NaN	NaN		NaN	NaN	NaN	0.276688	0.352562	0.369149	0.104795	0.402056	0.426955	0.257533	0.379289	NaN	NaN	NaN	NaN	NaN	NaN	NaN	NaN	NaN	NaN	NaN	NaN	NaN	NaN	NaN	NaN	0.239314	0.457068	0.596584	0.369566	0.577236	NaN	NaN	NaN	NaN	NaN	NaN	NaN
-40.5615	NaN	0.221669	NaN	NaN	NaN	NaN	NaN	NaN	NaN		NaN	NaN	NaN	0.322186	0.464056	0.274516	0.167901	0.261859	0.437704	0.467274	0.282082	NaN	NaN	NaN	NaN	NaN	NaN	NaN	NaN	NaN	NaN	NaN	NaN	NaN	NaN	NaN	NaN	0.283285	0.471562	1.01711	0.703004	0.627866	NaN	NaN	NaN	NaN	NaN	NaN	NaN
-40.4647	NaN	0.252148	NaN	NaN	NaN	NaN	NaN	NaN	NaN		NaN	NaN	NaN	0.44287	0.477623	0.388111	0.52289	0.449226	0.267021	0.343744	0.369276	NaN	NaN	NaN	NaN	NaN	NaN	NaN	NaN	NaN	NaN	NaN	NaN	NaN	NaN	NaN	NaN	0.18527	0.420134	0.516128	0.579518	0.558233	NaN	NaN	NaN	NaN	NaN	NaN	NaN
-40.3679	NaN	0.240675	NaN	NaN	NaN	NaN	NaN	NaN	NaN		NaN	NaN	NaN	0.0634247	0.307552	0.322284	0.0457436	0.16901	0.1866	0.266232	0.177768	NaN	NaN	NaN	NaN	NaN	NaN	NaN	NaN	NaN	NaN	NaN	NaN	NaN	NaN	NaN	NaN	0.29881	0.412032	0.458297	0.554028	0.38873	NaN	NaN	NaN	NaN	NaN	NaN	NaN
-40.2711	NaN	0.247237	NaN	NaN	NaN	NaN	NaN	NaN	NaN		NaN	NaN	NaN	0.0284397	0.171758	0.290701	0.26997	0.175209	0.248468	0.213379	0.241435	NaN	NaN	NaN	NaN	NaN	NaN	NaN	NaN	NaN	NaN	NaN	NaN	NaN	NaN	NaN	NaN	0.0670373	0.413263	0.626257	0.574994	0.736711	NaN	NaN	NaN	NaN	NaN	NaN	NaN
-40.1742	NaN	0.242521	NaN	NaN	NaN	NaN	NaN	NaN	NaN		NaN	NaN	NaN	0.385749	0.464481	0.329885	0.531198	0.403107	0.45483	0.768723	0.269304	NaN	NaN	NaN	NaN	NaN	NaN	NaN	NaN	NaN	NaN	NaN	NaN	NaN	NaN	NaN	NaN	0.290188	0.271031	0.295028	0.246962	0.768087	NaN	NaN	NaN	NaN	NaN	NaN	NaN
-40.0774	NaN	0.234896	NaN	NaN	NaN	NaN	NaN	NaN	NaN		NaN	NaN	NaN	0.220314	0.392639	0.404	0.247414	0.199813	0.200436	0.297358	0.259089	NaN	NaN	NaN	NaN	NaN	NaN	NaN	NaN	NaN	NaN	NaN	NaN	NaN	NaN	NaN	NaN	0.308548	0.435658	0.0514653	0.365324	0.583773	NaN	NaN	NaN	NaN	NaN	NaN	NaN
-39.9806	NaN	0.251161	NaN	NaN	NaN	NaN	NaN	NaN	NaN		NaN	NaN	NaN	0.647613	0.629099	0.457353	0.645129	0.719748	0.51762	0.416948	0.453064	NaN	NaN	NaN	NaN	NaN	NaN	NaN	NaN	NaN	NaN	NaN	NaN	NaN	NaN	NaN	NaN	0.256716	0.493842	0.46274	0.464587	0.695734	NaN	NaN	NaN	NaN	NaN	NaN	NaN
-39.8838	NaN	0.218441	NaN	NaN	NaN	NaN	NaN	NaN	NaN		NaN	NaN	NaN	0.165058	0.38447	0.281694	0.337574	0.295096	0.341184	0.206282	0.378297	NaN	NaN	NaN	NaN	NaN	NaN	NaN	NaN	NaN	NaN	NaN	NaN	NaN	NaN	NaN	NaN	0.343812	0.473449	0.457385	0.33387	0.9107	NaN	NaN	NaN	NaN	NaN	NaN	NaN
-39.787	NaN	0.21536	NaN	NaN	NaN	NaN	NaN	NaN	NaN		NaN	NaN	NaN	0.364846	0.302913	0.482334	0.355023	0.321283	0.299749	0.239575	0.454662	NaN	NaN	NaN	NaN	NaN	NaN	NaN	NaN	NaN	NaN	NaN	NaN	NaN	NaN	NaN	NaN	0.320407	0.379316	0.805473	0.340263	0.772685	NaN	NaN	NaN	NaN	NaN	NaN	NaN
-39.6902	NaN	0.16038	NaN	NaN	NaN	NaN	NaN	NaN	NaN		NaN	NaN	NaN	0.305824	0.478956	0.322857	0.190577	0.425338	0.237206	0.410611	0.26976	NaN	NaN	NaN	NaN	NaN	NaN	NaN	NaN	NaN	NaN	NaN	NaN	NaN	NaN	NaN	NaN	0.413256	0.579901	0.528568	0.372881	0.490478	NaN	NaN	NaN	NaN	NaN	NaN	NaN
-39.5934	NaN	0.20557	NaN	NaN	NaN	NaN	NaN	NaN	NaN		NaN	NaN	NaN	0.23346	0.349615	0.261035	0.133405	0.257925	0.0901315	0.128411	0.229716	NaN	NaN	NaN	NaN	NaN	NaN	NaN	NaN	NaN	NaN	NaN	NaN	NaN	NaN	NaN	NaN	0.639298	0.199413	0.429747	0.489808	0.431372	NaN	NaN	NaN	NaN	NaN	NaN	NaN
-39.4966	NaN	0.229825	NaN	NaN	NaN	NaN	NaN	NaN	NaN		NaN	NaN	NaN	0.54465	0.506757	0.609074	0.427318	0.323917	0.275939	0.319569	0.409256	NaN	NaN	NaN	NaN	NaN	NaN	NaN	NaN	NaN	NaN	NaN	NaN	NaN	NaN	NaN	NaN	0.307879	0.394411	0.252385	0.332736	0.713537	NaN	NaN	NaN	NaN	NaN	NaN	NaN
-39.3998	NaN	0.214344	NaN	NaN	NaN	NaN	NaN	NaN	NaN		NaN	NaN	NaN	0.329784	0.304967	0.305709	0.300359	0.335562	0.272799	0.263355	0.220249	NaN	NaN	NaN	NaN	NaN	NaN	NaN	NaN	NaN	NaN	NaN	NaN	NaN	NaN	NaN	NaN	0.515057	0.304563	0.152333	0.336008	0.581174	NaN	NaN	NaN	NaN	NaN	NaN	NaN
-39.303	NaN	0.153178	NaN	NaN	NaN	NaN	NaN	NaN	NaN		NaN	NaN	NaN	0.130239	0.253042	0.272193	0.270396	0.299262	0.247727	0.301042	0.239589	NaN	NaN	NaN	NaN	NaN	NaN	NaN	NaN	NaN	NaN	NaN	NaN	NaN	NaN	NaN	NaN	0.193162	0.211181	0.290163	0.409685	0.359705	NaN	NaN	NaN	NaN	NaN	NaN	NaN
-39.2062	NaN	0.171194	NaN	NaN	NaN	NaN	NaN	NaN	NaN		NaN	NaN	NaN	0.553903	0.415777	0.446966	0.471926	0.511581	0.348551	0.632539	0.342231	NaN	NaN	NaN	NaN	NaN	NaN	NaN	NaN	NaN	NaN	NaN	NaN	NaN	NaN	NaN	NaN	0.101731	0.347757	0.15805	0.23451	0.368227	NaN	NaN	NaN	NaN	NaN	NaN	NaN
-39.1094	NaN	0.180957	NaN	NaN	NaN	NaN	NaN	NaN	NaN		NaN	NaN	NaN	0.322015	0.380965	0.33678	0.314528	0.507564	0.463118	0.305797	0.320518	NaN	NaN	NaN	NaN	NaN	NaN	NaN	NaN	NaN	NaN	NaN	NaN	NaN	NaN	NaN	NaN	0.342051	0.158913	0.219448	0.285175	0.141713	NaN	NaN	NaN	NaN	NaN	NaN	NaN
-39.0126	NaN	0.232775	NaN	NaN	NaN	NaN	NaN	NaN	NaN		NaN	NaN	NaN	0.0538839	0.287068	0.279129	0.243479	0.23323	0.193205	0.192005	0.171228	NaN	NaN	NaN	NaN	NaN	NaN	NaN	NaN	NaN	NaN	NaN	NaN	NaN	NaN	NaN	NaN	0.351001	0.281882	0.243157	0.49702	0.285824	NaN	NaN	NaN	NaN	NaN	NaN	NaN
-38.9158	NaN	0.242909	NaN	NaN	NaN	NaN	NaN	NaN	NaN		NaN	NaN	NaN	0.216224	0.514264	0.268367	0.186298	0.337243	0.234092	0.358665	0.263215	NaN	NaN	NaN	NaN	NaN	NaN	NaN	NaN	NaN	NaN	NaN	NaN	NaN	NaN	NaN	NaN	0.462789	0.307766	0.465586	0.461752	0.550532	NaN	NaN	NaN	NaN	NaN	NaN	NaN
-38.819	NaN	0.217759	NaN	NaN	NaN	NaN	NaN	NaN	NaN		NaN	NaN	NaN	0.419025	0.376917	0.481792	0.33946	0.240503	0.234884	0.309256	0.369966	NaN	NaN	NaN	NaN	NaN	NaN	NaN	NaN	NaN	NaN	NaN	NaN	NaN	NaN	NaN	NaN	0.464361	0.235318	0.560727	0.490064	0.653548	NaN	NaN	NaN	NaN	NaN	NaN	NaN
-38.7222	NaN	0.197654	NaN	NaN	NaN	NaN	NaN	NaN	NaN		NaN	NaN	NaN	0.413162	0.342838	0.448948	0.437911	0.429427	0.313449	0.339735	0.359485	NaN	NaN	NaN	NaN	NaN	NaN	NaN	NaN	NaN	NaN	NaN	NaN	NaN	NaN	NaN	NaN	0.322551	0.0374521	0.287683	0.514664	0.48854	NaN	NaN	NaN	NaN	NaN	NaN	NaN
-38.6254	NaN	0.18641	NaN	NaN	NaN	NaN	NaN	NaN	NaN		NaN	NaN	NaN	0.400446	0.434539	0.282927	0.43186	0.344931	0.405286	0.436992	0.335521	NaN	NaN	NaN	NaN	NaN	NaN	NaN	NaN	NaN	NaN	NaN	NaN	NaN	NaN	NaN	NaN	0.409616	0.578451	0.351973	0.498658	0.411877	NaN	NaN	NaN	NaN	NaN	NaN	NaN
-38.5286	NaN	0.24823	NaN	NaN	NaN	NaN	NaN	NaN	NaN		NaN	NaN	NaN	0.247184	0.527655	0.281511	0.220239	0.286817	0.221807	0.387493	0.421291	NaN	NaN	NaN	NaN	NaN	NaN	NaN	NaN	NaN	NaN	NaN	NaN	NaN	NaN	NaN	NaN	0.650871	0.159943	0.565107	0.158078	0.356368	NaN	NaN	NaN	NaN	NaN	NaN	NaN
-38.4318	NaN	0.241239	NaN	NaN	NaN	NaN	NaN	NaN	NaN		NaN	NaN	NaN	0.405334	0.427733	0.334382	0.390081	0.370776	0.285851	0.464037	0.393234	NaN	NaN	NaN	NaN	NaN	NaN	NaN	NaN	NaN	NaN	NaN	NaN	NaN	NaN	NaN	NaN	0.675483	0.155579	0.0982923	0.499215	0.766252	NaN	NaN	NaN	NaN	NaN	NaN	NaN
-38.3349	NaN	0.308132	NaN	NaN	NaN	NaN	NaN	NaN	NaN		NaN	NaN	NaN	0.240922	0.135525	0.328364	0.462372	0.480995	0.371755	0.299558	0.390635	NaN	NaN	NaN	NaN	NaN	NaN	NaN	NaN	NaN	NaN	NaN	NaN	NaN	NaN	NaN	NaN	0.379317	0.836475	0.461172	0.157285	0.466342	NaN	NaN	NaN	NaN	NaN	NaN	NaN
-38.2381	NaN	0.292582	NaN	NaN	NaN	NaN	NaN	NaN	NaN		NaN	NaN	NaN	0.726315	0.65937	0.466735	0.612773	0.45486	0.381237	0.573069	0.49613	NaN	NaN	NaN	NaN	NaN	NaN	NaN	NaN	NaN	NaN	NaN	NaN	NaN	NaN	NaN	NaN	0.306619	0.251845	0.246538	0.650321	0.32145	NaN	NaN	NaN	NaN	NaN	NaN	NaN
-38.1413	NaN	0.235811	NaN	NaN	NaN	NaN	NaN	NaN	NaN		NaN	NaN	NaN	0.152292	0.297169	0.306723	0.418775	0.29407	0.205068	0.367266	0.25783	NaN	NaN	NaN	NaN	NaN	NaN	NaN	NaN	NaN	NaN	NaN	NaN	NaN	NaN	NaN	NaN	0.498244	0.518169	0.122018	0.364923	0.408429	NaN	NaN	NaN	NaN	NaN	NaN	NaN
-38.0445	NaN	0.297644	NaN	NaN	NaN	NaN	NaN	NaN	NaN		NaN	NaN	NaN	0.410033	0.475942	0.358005	0.359916	0.40362	0.254788	0.411649	0.58367	NaN	NaN	NaN	NaN	NaN	NaN	NaN	NaN	NaN	NaN	NaN	NaN	NaN	NaN	NaN	NaN	0.475591	0.382646	0.374442	0.35447	0.236734	NaN	NaN	NaN	NaN	NaN	NaN	NaN
-37.9477	NaN	0.240485	NaN	NaN	NaN	NaN	NaN	NaN	NaN		NaN	NaN	NaN	0.316018	0.320437	0.380906	0.419871	0.519745	0.33376	0.450016	0.420561	NaN	NaN	NaN	NaN	NaN	NaN	NaN	NaN	NaN	NaN	NaN	NaN	NaN	NaN	NaN	NaN	0.494176	0.581758	0.270626	0.276288	0.528974	NaN	NaN	NaN	NaN	NaN	NaN	NaN
-37.8509	NaN	0.293812	NaN	NaN	NaN	NaN	NaN	NaN	NaN		NaN	NaN	NaN	0.658022	0.476864	0.426853	0.488785	0.541163	0.472658	0.400198	0.351876	NaN	NaN	NaN	NaN	NaN	NaN	NaN	NaN	NaN	NaN	NaN	NaN	NaN	NaN	NaN	NaN	0.642471	0.432711	0.225102	0.377651	0.496107	NaN	NaN	NaN	NaN	NaN	NaN	NaN
-37.7541	NaN	0.206812	NaN	NaN	NaN	NaN	NaN	NaN	NaN		NaN	NaN	NaN	0.238628	0.409214	0.12686	0.393986	0.249616	0.281747	0.356693	0.308899	NaN	NaN	NaN	NaN	NaN	NaN	NaN	NaN	NaN	NaN	NaN	NaN	NaN	NaN	NaN	NaN	0.617621	0.317582	0.254916	0.455384	0.210006	NaN	NaN	NaN	NaN	NaN	NaN	NaN
-37.6573	NaN	0.240264	NaN	NaN	NaN	NaN	NaN	NaN	NaN		NaN	NaN	NaN	0.546061	0.554661	0.368875	0.242263	0.395039	0.431543	0.502737	0.431206	NaN	NaN	NaN	NaN	NaN	NaN	NaN	NaN	NaN	NaN	NaN	NaN	NaN	NaN	NaN	NaN	0.37134	0.359252	0.313868	0.515424	0.236066	NaN	NaN	NaN	NaN	NaN	NaN	NaN
-37.5605	NaN	0.24631	NaN	NaN	NaN	NaN	NaN	NaN	NaN		NaN	NaN	NaN	0.55147	0.44763	0.351464	0.367135	0.523427	0.385375	0.598123	0.355024	NaN	NaN	NaN	NaN	NaN	NaN	NaN	NaN	NaN	NaN	NaN	NaN	NaN	NaN	NaN	NaN	0.305893	0.368468	0.487963	0.323506	0.476728	NaN	NaN	NaN	NaN	NaN	NaN	NaN
-37.4637	NaN	0.163747	NaN	NaN	NaN	NaN	NaN	NaN	NaN		NaN	NaN	NaN	0.633753	0.699762	0.36197	0.437514	0.351995	0.367007	0.442664	0.485014	NaN	NaN	NaN	NaN	NaN	NaN	NaN	NaN	NaN	NaN	NaN	NaN	NaN	NaN	NaN	NaN	0.336064	0.428735	0.290882	0.405422	0.562201	NaN	NaN	NaN	NaN	NaN	NaN	NaN
-37.3669	NaN	0.169828	NaN	NaN	NaN	NaN	NaN	NaN	NaN		NaN	NaN	NaN	0.301696	0.334892	0.403941	0.579045	0.371665	0.181912	0.377971	0.276046	NaN	NaN	NaN	NaN	NaN	NaN	NaN	NaN	NaN	NaN	NaN	NaN	NaN	NaN	NaN	NaN	0.552699	0.256026	0.372505	0.227156	0.224861	NaN	NaN	NaN	NaN	NaN	NaN	NaN
-37.2701	NaN	0.205072	NaN	NaN	NaN	NaN	NaN	NaN	NaN		NaN	NaN	NaN	0.252389	0.391052	0.464253	0.427362	0.383751	0.261255	0.434016	0.330255	NaN	NaN	NaN	NaN	NaN	NaN	NaN	NaN	NaN	NaN	NaN	NaN	NaN	NaN	NaN	NaN	0.30207	0.121794	0.290786	0.348688	0.32007	NaN	NaN	NaN	NaN	NaN	NaN	NaN
-37.1733	NaN	0.226006	NaN	NaN	NaN	NaN	NaN	NaN	NaN		NaN	NaN	NaN	0.239703	0.264765	0.420918	0.340223	0.38301	0.312974	0.496654	0.37077	NaN	NaN	NaN	NaN	NaN	NaN	NaN	NaN	NaN	NaN	NaN	NaN	NaN	NaN	NaN	NaN	0.297074	0.287702	0.359614	0.423921	0.340029	NaN	NaN	NaN	NaN	NaN	NaN	NaN
-37.0765	NaN	0.28888	NaN	NaN	NaN	NaN	NaN	NaN	NaN		NaN	NaN	NaN	0.45729	0.33054	0.308351	0.447751	0.486242	0.424765	0.341081	0.417094	NaN	NaN	NaN	NaN	NaN	NaN	0.723982	0.246427	0.446141	0.257677	NaN	NaN	NaN	NaN	NaN	NaN	0.203691	0.263937	0.148385	0.278633	0.317819	NaN	NaN	NaN	NaN	NaN	NaN	NaN
-36.9797	NaN	0.193878	NaN	NaN	NaN	NaN	NaN	NaN	NaN		NaN	NaN	NaN	0.574998	0.475097	0.477345	0.250497	0.413146	0.549373	0.560401	0.22572	NaN	NaN	NaN	NaN	NaN	NaN	0.881449	0.130386	0.310345	0.244059	NaN	NaN	NaN	NaN	NaN	NaN	0.236708	0.198122	0.0872332	0.142299	0.265246	NaN	NaN	NaN	NaN	NaN	NaN	NaN
-36.8829	NaN	0.213093	NaN	NaN	NaN	NaN	NaN	NaN	NaN		NaN	NaN	NaN	0.400605	0.230059	0.285333	0.370064	0.269689	0.335252	0.53347	0.329877	NaN	NaN	NaN	NaN	NaN	NaN	0.7062	0.203177	0.277574	0.232388	NaN	NaN	NaN	NaN	NaN	NaN	0.148985	0.349697	0.147145	0.262202	0.408048	NaN	NaN	NaN	NaN	NaN	NaN	NaN
-36.7861	NaN	0.199372	NaN	NaN	NaN	NaN	NaN	NaN	NaN		NaN	NaN	NaN	0.205675	0.299494	0.344583	0.281039	0.213683	0.184704	0.360353	0.322751	NaN	NaN	NaN	NaN	NaN	NaN	0.623094	0.223745	0.241742	0.270336	NaN	NaN	NaN	NaN	NaN	0.161981	0.129575	0.13821	0.137515	0.295698	0.149347	NaN	NaN	NaN	NaN	NaN	NaN	NaN
-36.6893	NaN	0.200742	NaN	NaN	NaN	NaN	NaN	NaN	NaN		NaN	NaN	NaN	0.551738	0.369824	0.364136	0.394311	0.37812	0.366694	0.518631	0.310177	NaN	NaN	NaN	NaN	NaN	NaN	0.724274	0.139868	0.199787	0.407522	NaN	NaN	NaN	NaN	NaN	0.274046	0.180235	0.226133	0.301442	0.0768648	0.382368	NaN	NaN	NaN	NaN	NaN	NaN	NaN
-36.5924	NaN	0.212586	NaN	NaN	NaN	NaN	NaN	NaN	NaN		NaN	NaN	NaN	0.539647	0.588061	0.48006	0.412121	0.500708	0.451296	0.405387	0.410923	NaN	NaN	NaN	NaN	NaN	NaN	0.531065	0.0521243	0.329784	0.384227	NaN	NaN	NaN	NaN	NaN	0.344784	0.369738	0.329232	0.271995	0.338267	0.13913	NaN	NaN	NaN	NaN	NaN	NaN	NaN
-36.4956	NaN	0.154619	NaN	NaN	NaN	NaN	NaN	NaN	NaN		NaN	NaN	NaN	0.379227	0.464851	0.381314	0.288735	0.337991	0.335721	0.495402	0.384955	NaN	NaN	NaN	NaN	NaN	NaN	0.19066	-0.0375538	0.545758	0.280693	NaN	NaN	NaN	NaN	NaN	0.297144	-0.0210566	0.33535	0.118493	0.172779	0.248464	NaN	NaN	NaN	NaN	NaN	NaN	NaN
-36.3988	NaN	0.187329	NaN	NaN	NaN	NaN	NaN	NaN	NaN		NaN	NaN	NaN	0.622289	0.434441	0.353798	0.406239	0.473089	0.418519	0.327467	0.485792	NaN	NaN	NaN	NaN	NaN	NaN	0.598487	0.0895026	0.371989	0.371273	NaN	NaN	NaN	NaN	NaN	0.307504	0.342278	0.0926424	0.115615	0.143031	0.368858	NaN	NaN	NaN	NaN	NaN	NaN	NaN
-36.302	NaN	0.157044	NaN	NaN	NaN	NaN	NaN	NaN	NaN		NaN	NaN	NaN	0.501395	0.498867	0.440624	0.398023	0.361424	0.419356	0.370537	0.377598	NaN	NaN	NaN	NaN	NaN	NaN	0.887253	0.1785	0.350693	0.447338	NaN	NaN	NaN	NaN	NaN	0.367866	0.411913	0.218279	0.0506083	0.437852	0.140138	NaN	NaN	NaN	NaN	NaN	NaN	NaN
-36.2052	NaN	0.156854	NaN	NaN	NaN	NaN	NaN	NaN	NaN		NaN	NaN	NaN	0.449068	0.472138	0.374291	0.528169	0.278447	0.508159	0.413335	0.504476	NaN	NaN	NaN	NaN	NaN	NaN	0.937896	0.191378	0.634342	0.494372	NaN	NaN	NaN	NaN	NaN	0.311656	0.257685	0.189771	-0.000203259	0.179023	0.211785	NaN	NaN	NaN	NaN	NaN	NaN	NaN
-36.1084	NaN	0.157755	NaN	NaN	NaN	NaN	NaN	NaN	NaN		NaN	NaN	NaN	0.123584	0.2678	0.27987	0.283102	0.405895	0.24392	0.228482	0.176842	NaN	NaN	NaN	NaN	NaN	NaN	0.898437	0.12945	0.608777	0.506159	NaN	NaN	NaN	NaN	NaN	0.269972	0.133338	0.201552	0.266216	0.419924	0.517856	NaN	NaN	NaN	NaN	NaN	NaN	NaN
-36.0116	NaN	0.0770197	NaN	NaN	NaN	NaN	NaN	NaN	NaN		NaN	NaN	NaN	0.208507	0.298386	0.274859	0.325888	0.364875	0.285116	0.305914	0.365769	NaN	NaN	NaN	NaN	NaN	NaN	0.813925	0.0301193	0.428605	0.500324	NaN	NaN	NaN	NaN	NaN	0.323863	0.262207	0.400446	0.0795933	-0.0138979	0.191852	NaN	NaN	NaN	NaN	NaN	NaN	NaN
-35.9148	NaN	0.169593	NaN	NaN	NaN	NaN	NaN	NaN	NaN		NaN	NaN	NaN	0.556836	0.369579	0.52454	0.465742	0.491922	0.40518	0.618493	0.595312	NaN	NaN	NaN	NaN	NaN	NaN	0.737008	0.0551885	0.503292	0.332582	NaN	NaN	NaN	NaN	NaN	0.329391	0.161403	0.291253	0.276363	0.264607	0.276933	NaN	NaN	NaN	NaN	NaN	NaN	NaN
-35.818	NaN	0.133736	NaN	NaN	NaN	NaN	NaN	NaN	NaN		NaN	NaN	NaN	0.696428	0.559154	0.540905	0.480001	0.53203	0.545666	0.542476	0.51244	NaN	NaN	NaN	NaN	NaN	NaN	0.71896	0.0382185	0.545142	0.281957	NaN	NaN	NaN	NaN	NaN	0.23503	0.221016	0.163264	0.10697	0.243944	0.0271074	NaN	NaN	NaN	NaN	NaN	NaN	NaN
-35.7212	NaN	0.10516	NaN	NaN	NaN	NaN	NaN	NaN	NaN		NaN	NaN	NaN	0.508894	0.556447	0.406968	0.428289	0.460276	0.35889	0.374657	0.45598	NaN	NaN	NaN	NaN	NaN	NaN	0.81865	-0.0628299	0.521319	0.465569	NaN	NaN	NaN	NaN	NaN	0.231097	0.115599	0.197989	0.328201	0.227288	0.229095	NaN	NaN	NaN	NaN	NaN	NaN	NaN
-35.6244	NaN	0.100021	NaN	NaN	NaN	NaN	NaN	NaN	NaN		NaN	NaN	NaN	0.515953	0.528964	0.297696	0.652189	0.410827	0.401949	0.628494	0.519098	NaN	NaN	NaN	NaN	NaN	NaN	0.789054	0.0257624	0.370095	0.30641	NaN	NaN	NaN	NaN	NaN	0.191625	0.249403	0.329283	0.228996	0.34481	0.143933	NaN	NaN	NaN	NaN	NaN	NaN	NaN
-35.5276	NaN	0.09692	NaN	NaN	NaN	NaN	NaN	NaN	NaN		NaN	NaN	NaN	0.398699	0.304976	0.37967	0.401878	0.33893	0.362905	0.302815	0.378298	NaN	NaN	NaN	NaN	NaN	NaN	0.694815	0.209175	0.155171	-0.0241334	NaN	NaN	NaN	NaN	NaN	0.0726525	0.185352	0.195214	0.352482	0.245616	0.408988	NaN	NaN	NaN	NaN	NaN	NaN	NaN
-35.4308	NaN	0.124483	NaN	NaN	NaN	NaN	NaN	NaN	NaN		NaN	NaN	NaN	0.46838	0.437762	0.283897	0.495077	0.372439	0.447319	0.451562	0.427398	NaN	NaN	NaN	NaN	NaN	NaN	0.585846	0.139855	0.249485	0.394538	NaN	NaN	NaN	NaN	NaN	0.125455	0.20547	0.238792	0.141625	0.212045	0.0878409	NaN	NaN	NaN	NaN	NaN	NaN	NaN
-35.334	NaN	0.153253	NaN	NaN	NaN	NaN	NaN	NaN	NaN		NaN	NaN	NaN	0.629038	0.463567	0.45623	0.4665	0.46373	0.511097	0.518532	0.407776	NaN	NaN	NaN	NaN	NaN	NaN	0.511946	0.133203	0.22584	0.5613	NaN	NaN	NaN	NaN	NaN	0.196058	0.237292	0.0691414	0.189815	0.28469	0.173766	NaN	NaN	NaN	NaN	NaN	NaN	NaN
-35.2372	NaN	0.222958	NaN	NaN	NaN	NaN	NaN	NaN	NaN		NaN	NaN	NaN	0.291973	0.322975	0.329025	0.361269	0.406857	0.277674	0.338294	0.236589	NaN	NaN	NaN	NaN	NaN	NaN	0.508184	0.251888	-0.0337232	0.224244	NaN	NaN	NaN	NaN	NaN	0.237497	0.378659	0.190203	0.255049	0.127727	0.181155	NaN	NaN	NaN	NaN	NaN	NaN	NaN
-35.1404	NaN	0.123405	NaN	NaN	NaN	NaN	NaN	NaN	NaN		NaN	NaN	NaN	0.436572	0.426931	0.361792	0.338267	0.440395	0.548631	0.411327	0.438549	NaN	NaN	NaN	NaN	NaN	NaN	0.543046	0.267284	-0.0440105	0.00810262	NaN	NaN	NaN	NaN	NaN	0.221958	0.302598	0.407377	0.175805	0.359396	0.144714	NaN	NaN	NaN	NaN	NaN	NaN	NaN
-35.0436	NaN	0.171132	NaN	NaN	NaN	NaN	NaN	NaN	NaN		NaN	NaN	NaN	0.247427	0.371589	0.360976	0.353643	0.305314	0.28195	0.38904	0.361165	NaN	NaN	NaN	NaN	NaN	NaN	0.597219	0.231036	0.0703402	-0.147581	NaN	NaN	NaN	NaN	NaN	0.311025	0.297812	0.295664	0.160217	0.586936	0.31209	NaN	NaN	NaN	NaN	NaN	NaN	NaN
-34.9468	NaN	0.289971	NaN	NaN	NaN	NaN	NaN	NaN	NaN		NaN	NaN	NaN	0.384223	0.440063	0.338104	0.404375	0.3939	0.346895	0.523668	0.42831	NaN	NaN	NaN	NaN	NaN	NaN	0.361942	0.1651	0.103497	-0.0775651	NaN	NaN	NaN	NaN	NaN	0.217363	0.531163	0.765638	0.340312	0.351046	0.268602	NaN	NaN	NaN	NaN	NaN	NaN	NaN
-34.85	NaN	0.247206	NaN	NaN	NaN	NaN	NaN	NaN	NaN		NaN	NaN	NaN	0.26419	0.345941	0.327418	0.349608	0.342741	0.2825	0.338125	0.270703	NaN	NaN	NaN	NaN	NaN	NaN	0.252757	0.113149	0.204661	0.0105571	NaN	NaN	NaN	NaN	NaN	0.308269	0.334382	0.377239	0.380324	0.448415	0.187507	NaN	NaN	NaN	NaN	NaN	NaN	NaN
-34.7531	NaN	0.274794	NaN	NaN	NaN	NaN	NaN	NaN	NaN		NaN	NaN	NaN	0.588642	0.53855	0.477916	0.477934	0.435254	0.516194	0.502456	0.453306	NaN	NaN	NaN	NaN	NaN	NaN	0.395757	0.0891665	0.44184	0.134892	NaN	NaN	NaN	NaN	NaN	0.189353	0.208589	0.296004	0.349056	0.265537	0.239398	NaN	NaN	NaN	NaN	NaN	NaN	NaN
-34.6563	NaN	0.216118	NaN	NaN	NaN	NaN	NaN	NaN	NaN		NaN	NaN	NaN	0.412225	0.490371	0.445519	0.348204	0.297931	0.358352	0.430839	0.394686	NaN	NaN	NaN	NaN	NaN	NaN	0.416153	0.0880542	0.36417	0.29269	NaN	NaN	NaN	NaN	NaN	0.351465	0.1936	0.434881	0.394805	0.395923	0.361735	NaN	NaN	NaN	NaN	NaN	NaN	NaN
-34.5595	NaN	0.222448	NaN	NaN	NaN	NaN	NaN	NaN	NaN		NaN	NaN	NaN	1.02071	0.724779	0.639455	0.658981	0.749514	0.753708	0.723783	0.684069	NaN	NaN	NaN	NaN	NaN	NaN	0.375247	0.0983772	0.129076	0.467219	NaN	NaN	NaN	NaN	NaN	0.368189	0.14727	0.33937	0.246913	0.282105	0.376665	NaN	NaN	NaN	NaN	NaN	NaN	NaN
-34.4627	NaN	0.280033	NaN	NaN	NaN	NaN	NaN	NaN	NaN		NaN	NaN	NaN	0.646085	0.508896	0.488843	0.529638	0.422618	0.53217	0.553193	0.419032	NaN	NaN	NaN	NaN	NaN	NaN	0.622912	0.204717	0.337927	0.762215	NaN	NaN	NaN	NaN	NaN	0.276784	0.0979309	0.357334	0.368071	0.29739	0.349151	NaN	NaN	NaN	NaN	NaN	NaN	NaN
-34.3659	NaN	0.35804	NaN	NaN	NaN	NaN	NaN	NaN	NaN		NaN	NaN	NaN	0.599047	0.622113	0.538201	0.495913	0.51083	0.632451	0.507272	0.424862	NaN	NaN	NaN	NaN	NaN	NaN	0.827429	0.290627	0.551609	0.86954	0.220822	0.565227	0.553949	0.333199	0.335767	0.331605	0.32398	0.416844	0.294254	0.257883	0.252018	NaN	NaN	NaN	NaN	NaN	NaN	NaN
-34.2691	NaN	0.376324	NaN	NaN	NaN	NaN	NaN	NaN	NaN		NaN	NaN	NaN	0.825854	0.633556	0.59091	0.660616	0.492913	0.603838	0.674118	0.682126	NaN	NaN	NaN	NaN	NaN	NaN	0.945651	0.335677	0.774953	0.601521	0.208884	0.630827	0.376175	0.0545953	0.0788175	0.297423	0.345498	0.193189	0.233876	0.385139	0.265396	NaN	NaN	NaN	NaN	NaN	NaN	NaN
-34.1723	NaN	0.354662	NaN	NaN	NaN	NaN	NaN	NaN	NaN		NaN	NaN	NaN	0.705131	0.578441	0.560493	0.53622	0.569654	0.617311	0.627534	0.557891	NaN	NaN	NaN	NaN	NaN	NaN	0.870172	0.261099	0.664994	0.438893	0.371455	0.486305	0.605739	0.684002	0.561568	0.2193	0.224378	0.200423	0.168879	0.34847	0.282419	NaN	NaN	NaN	NaN	NaN	NaN	NaN
-34.0755	NaN	0.298681	NaN	NaN	NaN	NaN	NaN	NaN	NaN		NaN	NaN	NaN	0.602126	0.475947	0.498104	0.462615	0.515876	0.474736	0.605278	0.481116	NaN	NaN	NaN	NaN	NaN	NaN	0.697844	0.126706	0.388384	0.32896	0.418885	0.352187	0.687789	0.994629	0.817691	0.302643	0.559114	0.235703	0.185537	0.228153	0.266916	NaN	NaN	NaN	NaN	NaN	NaN	NaN
-33.9787	NaN	0.294825	NaN	NaN	NaN	NaN	NaN	NaN	NaN		NaN	NaN	NaN	0.392143	0.314517	0.437426	0.421613	0.393388	0.52556	0.32301	0.442439	NaN	NaN	NaN	NaN	NaN	NaN	0.459452	0.212166	0.357435	0.511731	0.236034	0.23888	0.474812	0.667698	0.62056	0.054885	0.277547	0.297525	0.169967	0.205945	0.227091	NaN	NaN	NaN	NaN	NaN	NaN	NaN
-33.8819	NaN	0.394915	NaN	NaN	NaN	NaN	NaN	NaN	NaN		NaN	NaN	NaN	0.54968	0.600963	0.536733	0.558705	0.537204	0.582129	0.623214	0.642662	NaN	NaN	NaN	NaN	NaN	NaN	0.346238	0.243805	0.319276	0.575439	0.19654	0.225038	0.451894	0.341989	0.365628	0.265332	0.314458	0.299065	0.210262	0.146201	0.379681	NaN	NaN	NaN	NaN	NaN	NaN	NaN
-33.7851	NaN	0.388783	NaN	NaN	NaN	NaN	NaN	NaN	NaN		NaN	NaN	NaN	0.371797	0.572527	0.595321	0.469806	0.471219	0.43404	0.391785	0.543838	NaN	NaN	NaN	NaN	NaN	NaN	0.483379	0.167804	0.266697	0.401022	0.228723	0.260928	0.524005	0.0168903	0.0817952	0.184868	0.390179	0.197482	0.185118	0.224288	0.341837	NaN	NaN	NaN	NaN	NaN	NaN	NaN
-33.6883	NaN	0.365828	NaN	NaN	NaN	NaN	NaN	NaN	NaN		NaN	NaN	NaN	0.582177	0.739138	0.582426	0.625578	0.663405	0.574161	0.720138	0.521422	NaN	NaN	NaN	NaN	NaN	NaN	0.579927	0.1697	0.534973	0.31262	0.23642	0.304751	0.428585	0.30531	0.357015	0.181389	0.244287	0.282667	0.182358	0.254612	0.309201	NaN	NaN	NaN	NaN	NaN	NaN	NaN
-33.5915	NaN	0.424948	NaN	NaN	NaN	NaN	NaN	NaN	NaN		NaN	NaN	NaN	0.503617	0.593795	0.452415	0.432137	0.459372	0.466133	0.455824	0.494431	NaN	NaN	NaN	NaN	NaN	NaN	0.65618	0.210544	0.963675	0.267225	0.30225	0.348017	0.376018	0.403572	0.439107	0.205575	0.36905	0.20294	0.212244	0.209525	0.115654	NaN	NaN	NaN	NaN	NaN	NaN	NaN
-33.4947	NaN	0.380464	NaN	NaN	NaN	NaN	NaN	NaN	NaN		NaN	NaN	NaN	0.574051	0.433383	0.491138	0.401336	0.405077	0.622145	0.457941	0.382865	NaN	NaN	NaN	NaN	NaN	NaN	0.837637	0.146639	0.59273	0.384253	0.484348	0.390169	0.40916	0.121521	0.134941	0.229943	0.376996	0.284274	0.143136	0.161077	0.230411	NaN	NaN	NaN	NaN	NaN	NaN	NaN
-33.3979	NaN	0.378386	NaN	NaN	NaN	NaN	NaN	NaN	NaN		NaN	NaN	NaN	0.353923	0.418899	0.396424	0.440854	0.481277	0.405666	0.512215	0.407397	NaN	NaN	NaN	NaN	NaN	NaN	0.907908	0.101002	0.353072	0.496577	0.370016	0.448335	0.333089	0.202206	0.207378	0.257052	0.0900671	0.258309	0.236343	0.295649	0.195334	NaN	NaN	NaN	NaN	NaN	NaN	NaN
-33.3011	NaN	0.367276	NaN	NaN	NaN	NaN	NaN	NaN	NaN		NaN	NaN	NaN	0.635061	0.526181	0.559871	0.564992	0.54222	0.565293	0.500695	0.516368	NaN	NaN	NaN	NaN	NaN	NaN	0.755807	0.0919027	0.375987	0.599493	0.107468	0.514508	0.202412	0.464259	0.468118	0.138587	0.401282	0.300341	0.239703	0.214258	0.319399	NaN	NaN	NaN	NaN	NaN	NaN	NaN
-33.2043	NaN	0.391869	NaN	NaN	NaN	NaN	NaN	NaN	NaN		NaN	NaN	NaN	0.648474	0.663012	0.571982	0.566231	0.633449	0.482245	0.546663	0.682534	NaN	NaN	NaN	NaN	NaN	NaN	0.532822	0.212812	0.269441	0.631851	-0.0598555	0.277581	0.253104	0.398261	0.38357	0.217693	0.235457	0.121385	0.0397456	0.209304	0.17745	NaN	NaN	NaN	NaN	NaN	NaN	NaN
-33.1075	NaN	0.377412	NaN	NaN	NaN	NaN	NaN	NaN	NaN		NaN	NaN	NaN	0.350443	0.366278	0.398062	0.379499	0.473003	0.469482	0.461439	0.324889	NaN	NaN	NaN	NaN	NaN	NaN	0.274396	0.398726	0.0981636	0.628929	-0.115314	0.12844	0.286139	0.299816	0.278899	0.159595	0.164242	0.356539	0.331568	0.3444	0.13507	NaN	NaN	NaN	NaN	NaN	NaN	NaN
-33.0106	NaN	0.408436	NaN	NaN	NaN	NaN	NaN	NaN	NaN		NaN	NaN	NaN	0.633746	0.463428	0.56411	0.504294	0.564784	0.524827	0.514821	0.554492	NaN	NaN	NaN	NaN	NaN	NaN	0.55073	0.227181	0.34002	0.734954	0.052956	0.15487	0.283861	0.136473	0.133982	0.170894	0.206081	0.429887	0.302971	0.230872	0.297958	NaN	NaN	NaN	NaN	NaN	NaN	NaN
-32.9138	NaN	0.371948	NaN	NaN	NaN	NaN	NaN	NaN	NaN		NaN	NaN	NaN	0.467949	0.366971	0.489702	0.514476	0.462742	0.526465	0.510499	0.609808	NaN	NaN	NaN	NaN	NaN	NaN	0.748191	0.140605	0.494956	0.761363	0.206902	0.0779839	0.237603	0.090828	0.0671368	0.152283	0.297341	0.41946	0.311686	0.383638	0.486599	NaN	NaN	NaN	NaN	NaN	NaN	NaN
-32.817	NaN	0.346852	NaN	NaN	NaN	NaN	NaN	NaN	NaN		NaN	NaN	NaN	0.385549	0.417428	0.330636	0.598566	0.403564	0.502725	0.423329	0.41053	NaN	NaN	NaN	NaN	NaN	NaN	0.787907	0.223964	0.476052	0.628539	0.353687	-0.0505598	0.169355	0.104032	0.0393265	0.0275696	0.271886	0.398115	0.304004	0.329842	0.246564	NaN	NaN	NaN	NaN	NaN	NaN	NaN
-32.7202	NaN	0.378455	NaN	NaN	NaN	NaN	NaN	NaN	NaN		NaN	NaN	NaN	0.452878	0.407382	0.451713	0.356338	0.417903	0.339889	0.358461	0.600951	NaN	NaN	NaN	NaN	NaN	NaN	0.621784	0.218135	0.505222	0.474861	0.23029	0.0623377	0.0427915	0.490855	0.454518	0.198897	0.267667	0.370145	0.272137	0.33466	0.388154	NaN	NaN	NaN	NaN	NaN	NaN	NaN
-32.6234	NaN	0.402213	NaN	NaN	NaN	NaN	NaN	NaN	NaN		NaN	NaN	NaN	0.462903	0.4912	0.499662	0.405398	0.547011	0.541239	0.40762	0.466065	NaN	NaN	NaN	NaN	NaN	NaN	0.352741	0.167713	0.558428	0.310754	0.129981	0.146631	0.0222054	0.637488	0.641028	-0.00715386	0.137159	0.401422	0.296573	0.312682	0.367701	NaN	NaN	NaN	NaN	NaN	NaN	NaN
-32.5266	NaN	0.285462	NaN	NaN	NaN	NaN	NaN	NaN	NaN		NaN	NaN	NaN	0.556896	0.531584	0.454369	0.458087	0.394062	0.410262	0.576451	0.494694	NaN	NaN	NaN	NaN	NaN	NaN	0.304554	0.285244	0.503384	0.378618	0.0758492	0.173714	0.213574	0.303743	0.370172	0.00916559	0.384284	0.31216	0.341204	0.276387	0.281346	NaN	NaN	NaN	NaN	NaN	NaN	NaN
-32.4298	NaN	0.370723	NaN	NaN	NaN	NaN	NaN	NaN	NaN		NaN	NaN	NaN	0.459471	0.540742	0.326747	0.479181	0.436762	0.431192	0.384997	0.460847	NaN	NaN	NaN	NaN	NaN	NaN	0.346607	0.349659	0.461714	0.369625	0.112132	0.307189	0.18066	0.329363	0.413634	0.0967925	-0.00183327	0.303103	0.262701	0.317225	0.29681	NaN	NaN	NaN	NaN	NaN	NaN	NaN
-32.333	NaN	0.372082	NaN	NaN	NaN	NaN	NaN	NaN	NaN		NaN	NaN	NaN	0.490273	0.553557	0.405033	0.356515	0.484001	0.479696	0.502016	0.357663	NaN	NaN	NaN	NaN	NaN	NaN	0.569138	0.307841	0.446791	0.206918	0.193623	0.49386	0.0356054	0.534665	0.614255	0.151872	0.317565	0.223404	0.33275	0.332593	0.371247	NaN	NaN	NaN	NaN	NaN	NaN	NaN
-32.2362	NaN	0.455552	NaN	NaN	NaN	NaN	NaN	NaN	NaN		NaN	NaN	NaN	0.40338	0.402011	0.31769	0.524165	0.461421	0.346597	0.334921	0.522296	NaN	NaN	NaN	NaN	NaN	NaN	0.497055	0.235802	0.585752	0.458797	0.0767374	0.252956	0.0168331	0.605046	0.702661	0.122303	0.20098	0.353893	0.233082	0.260585	0.33256	NaN	NaN	NaN	NaN	NaN	NaN	NaN
-32.1394	NaN	0.436225	NaN	NaN	NaN	NaN	NaN	NaN	NaN		NaN	NaN	NaN	0.266229	0.3119	0.303524	0.453495	0.236628	0.317654	0.347361	0.301298	NaN	NaN	NaN	NaN	NaN	NaN	0.277663	0.148653	0.801656	0.91797	0.0247587	0.112162	0.00701828	0.631015	0.725228	0.201403	0.309578	0.224258	0.355231	0.221652	0.288608	NaN	NaN	NaN	NaN	NaN	NaN	NaN
-32.0426	NaN	0.446706	NaN	NaN	NaN	NaN	NaN	NaN	NaN		0.259984	0.559302	0.536842	0.459136	0.367358	0.377738	0.391302	0.410818	0.444542	0.523305	0.452787	NaN	NaN	NaN	NaN	NaN	NaN	0.394462	0.185704	0.723972	0.332523	0.102593	0.17159	0.0151185	0.568162	0.616115	0.215633	0.255133	0.280627	0.254489	0.392308	0.342397	NaN	NaN	NaN	NaN	NaN	NaN	NaN
-31.9458	NaN	0.410473	NaN	NaN	NaN	NaN	NaN	NaN	NaN		0.336274	0.404647	0.309473	0.560777	0.381142	0.42317	0.434751	0.402551	0.503329	0.463382	0.42711	NaN	NaN	NaN	NaN	NaN	NaN	0.469429	0.232139	0.650518	0.0214417	0.159544	0.246882	0.0562127	0.525803	0.550023	0.237632	0.281027	0.360601	0.183685	0.227133	0.373191	NaN	NaN	NaN	NaN	NaN	NaN	NaN
-31.849	NaN	0.346022	NaN	NaN	NaN	NaN	NaN	NaN	NaN		0.353255	0.305479	0.207131	0.448386	0.286686	0.379545	0.398625	0.367498	0.555782	0.382759	0.625607	NaN	NaN	NaN	NaN	NaN	NaN	0.460735	0.297342	0.585524	0.25909	0.206054	0.330106	0.113804	0.493691	0.50544	0.156778	0.253437	0.152412	0.331147	0.325737	0.295622	NaN	NaN	NaN	NaN	NaN	NaN	NaN
-31.7522	NaN	0.343754	NaN	NaN	NaN	NaN	NaN	NaN	NaN		0.340581	0.234054	0.167303	0.430302	0.409383	0.33292	0.509128	0.348826	0.357372	0.35065	0.47037	NaN	NaN	NaN	NaN	NaN	NaN	0.437469	0.327924	0.47671	0.265719	0.155231	0.362547	-0.00733159	0.473418	0.472445	0.221397	0.137532	0.215082	0.337315	0.365208	0.29789	NaN	NaN	NaN	NaN	NaN	NaN	NaN
-31.6554	NaN	0.362509	NaN	NaN	NaN	NaN	NaN	NaN	NaN		0.418167	0.223722	0.257274	0.466209	0.31737	0.341777	0.451703	0.642612	0.50103	0.429829	0.397671	NaN	NaN	NaN	NaN	NaN	NaN	0.406917	0.341194	0.345984	0.156838	0.146982	0.355286	-0.0389989	0.472059	0.429116	0.192473	0.10011	0.284606	0.190622	0.381217	0.170269	NaN	NaN	NaN	NaN	NaN	NaN	NaN
-31.5586	NaN	0.364927	NaN	NaN	NaN	NaN	NaN	NaN	NaN		0.427811	0.216498	0.307351	0.465483	0.483677	0.391908	0.458961	0.470547	0.559954	0.371101	0.522903	NaN	NaN	NaN	NaN	NaN	NaN	0.319218	0.377517	0.529242	0.292536	0.223882	0.268618	0.10827	0.508526	0.365117	0.151797	0.116057	0.324317	0.366536	0.292086	0.366444	NaN	NaN	NaN	NaN	NaN	NaN	NaN
-31.4618	NaN	0.327471	NaN	NaN	NaN	NaN	NaN	NaN	NaN		0.301573	0.215487	0.27764	0.447295	0.414159	0.420468	0.310438	0.449947	0.344522	0.358398	0.451291	NaN	NaN	NaN	NaN	NaN	NaN	0.308424	0.348523	0.638476	0.351426	0.271933	0.249331	0.185035	0.264387	0.177402	0.154199	0.175378	0.296012	0.163271	0.265669	0.238704	NaN	NaN	NaN	NaN	NaN	NaN	NaN
-31.365	NaN	0.349026	NaN	NaN	NaN	NaN	NaN	NaN	NaN		0.253663	0.201279	0.40152	0.321933	0.274093	0.273873	0.326537	0.315373	0.416536	0.48532	0.360332	NaN	NaN	NaN	NaN	NaN	NaN	0.451438	0.188898	0.599661	0.256702	0.30556	0.263734	0.226548	-0.120056	-0.0721718	0.138431	0.0185919	0.405786	0.221775	0.365378	0.434852	NaN	NaN	NaN	NaN	NaN	NaN	NaN
-31.2682	NaN	0.283706	NaN	NaN	NaN	NaN	NaN	NaN	NaN		0.244917	0.180472	0.602195	0.722692	0.664351	0.574708	0.403247	0.491362	0.519891	0.524488	0.48833	NaN	NaN	NaN	NaN	NaN	NaN	0.517344	0.117103	0.572551	0.180505	0.260821	0.302298	0.336996	0.24706	0.236142	0.161069	0.327198	0.28977	0.204797	0.267186	0.327634	NaN	NaN	NaN	NaN	NaN	NaN	NaN
-31.1713	NaN	0.333765	NaN	NaN	NaN	NaN	NaN	NaN	NaN		0.148757	0.223916	0.392411	0.468356	0.479634	0.46194	0.394515	0.395796	0.469531	0.456143	0.562836	NaN	NaN	NaN	NaN	NaN	NaN	0.544695	0.0892235	0.551295	0.113573	0.219292	0.311197	0.412463	0.565804	0.521293	0.133027	0.127593	0.261207	0.26622	0.212707	0.28789	NaN	NaN	NaN	NaN	NaN	NaN	NaN
-31.0745	NaN	0.303933	NaN	NaN	NaN	NaN	NaN	NaN	NaN		0.137713	0.275075	0.380851	0.397376	0.5303	0.319858	0.383715	0.423868	0.430081	0.391228	0.422286	NaN	NaN	NaN	NaN	NaN	NaN	0.486013	0.257289	0.360327	0.255429	0.184186	0.260766	0.417966	0.787803	0.760122	0.121597	0.28908	0.36121	0.263607	0.28077	0.300441	NaN	NaN	NaN	NaN	NaN	NaN	NaN
-30.9777	NaN	0.341019	NaN	NaN	NaN	NaN	NaN	NaN	NaN		0.296902	0.341662	0.765738	0.568454	0.457914	0.444948	0.448809	0.530707	0.517165	0.5842	0.329507	NaN	NaN	NaN	NaN	NaN	NaN	0.413781	0.351008	0.32703	0.372062	0.309957	0.231957	0.282451	0.722875	0.710425	0.159839	0.217492	0.325162	0.204996	0.264452	0.33374	NaN	NaN	NaN	NaN	NaN	NaN	NaN
-30.8809	NaN	0.276793	NaN	NaN	NaN	NaN	NaN	NaN	NaN		0.386764	0.333473	0.56669	0.452654	0.355452	0.425678	0.39732	0.342139	0.421813	0.54996	0.437171	NaN	NaN	NaN	NaN	NaN	NaN	0.314445	0.296033	0.609075	0.43825	0.516167	0.213959	0.076427	0.514481	0.516465	0.200079	0.168108	0.243072	0.159339	0.249416	0.438228	NaN	NaN	NaN	NaN	NaN	NaN	NaN
-30.7841	NaN	0.289657	NaN	NaN	NaN	NaN	NaN	NaN	NaN		0.441961	0.287895	0.0756758	0.603732	0.528929	0.512315	0.458377	0.469877	0.631825	0.546833	0.390716	NaN	NaN	NaN	NaN	NaN	NaN	0.350305	0.443137	0.472556	0.381954	0.388867	0.169688	0.222328	0.567961	0.629475	0.150812	0.350002	0.308898	0.22314	0.261618	0.371707	NaN	NaN	NaN	NaN	NaN	NaN	NaN
-30.6873	NaN	0.268824	NaN	NaN	NaN	NaN	NaN	NaN	NaN		0.302586	0.19552	0.0337339	0.144008	0.292308	0.213294	0.245988	0.250435	0.21767	0.256691	0.309602	NaN	NaN	NaN	NaN	NaN	NaN	0.453763	0.691281	0.126756	0.264416	0.350963	0.176448	0.365261	0.528667	0.627309	0.153876	0.202165	0.289816	0.280667	0.339855	0.290652	NaN	NaN	NaN	NaN	NaN	NaN	NaN
-30.5905	NaN	0.271998	NaN	NaN	NaN	NaN	NaN	NaN	NaN		0.185877	0.15888	0.0606144	0.430706	0.410038	0.280473	0.374898	0.37354	0.451332	0.490064	0.395416	NaN	NaN	NaN	NaN	NaN	NaN	0.470362	0.479345	0.249476	0.264552	0.49185	0.285271	0.502257	0.303825	0.394787	0.190186	0.3712	0.20685	0.13084	0.275165	0.41307	NaN	NaN	NaN	NaN	NaN	NaN	NaN
-30.4937	NaN	0.280692	NaN	NaN	NaN	NaN	NaN	NaN	NaN		0.114498	0.23371	0.22514	0.284021	0.381642	0.392089	0.301906	0.39836	0.467418	0.4035	0.413804	NaN	NaN	NaN	NaN	NaN	NaN	0.45039	0.34315	0.368216	0.273981	0.470266	0.355217	0.620996	0.488277	0.555226	0.220062	0.446587	0.230533	0.266313	0.335107	0.400239	NaN	NaN	NaN	NaN	NaN	NaN	NaN
-30.3969	NaN	0.272914	NaN	NaN	NaN	NaN	NaN	NaN	NaN		0.30652	0.204975	0.1865	0.537327	0.457423	0.528375	0.617836	0.523301	0.566935	0.416432	0.45455	NaN	NaN	NaN	NaN	NaN	NaN	0.357278	0.358437	0.478995	0.301995	0.367446	0.405724	0.730604	0.877378	0.912146	0.2356	0.348473	0.303307	0.266692	0.230819	0.313229	NaN	NaN	NaN	NaN	NaN	NaN	NaN
-30.3001	NaN	0.220085	NaN	NaN	NaN	NaN	NaN	NaN	NaN		0.630243	0.124456	0.0462776	0.68782	0.576574	0.536452	0.644141	0.638812	0.682877	0.559424	0.716435	NaN	NaN	NaN	NaN	NaN	NaN	0.392135	0.39011	0.249313	0.307683	0.385771	0.472531	0.565028	0.55996	0.618224	0.233951	0.2592	0.203656	0.109775	0.267003	0.362168	NaN	NaN	NaN	NaN	NaN	NaN	NaN
-30.2033	NaN	0.277792	NaN	NaN	NaN	NaN	NaN	NaN	NaN		0.45089	0.138014	0.527751	0.54306	0.413336	0.453804	0.483774	0.548672	0.539269	0.582094	0.391654	NaN	NaN	NaN	NaN	NaN	NaN	0.470437	0.333176	0.259595	0.338733	0.390824	0.52375	0.456846	0.33382	0.400997	0.329474	0.353697	0.24965	0.193812	0.295985	0.254717	NaN	NaN	NaN	NaN	NaN	NaN	NaN
-30.1065	NaN	0.214453	NaN	NaN	NaN	NaN	NaN	NaN	NaN		0.312962	0.166158	0.801992	0.511801	0.581843	0.591957	0.434546	0.654895	0.579704	0.555843	0.505321	NaN	NaN	NaN	NaN	NaN	NaN	0.567342	0.337271	0.340593	0.435521	0.369333	0.543793	0.463453	0.290238	0.337161	0.24529	0.317322	0.248679	0.226799	0.341769	0.182402	NaN	NaN	NaN	NaN	NaN	NaN	NaN
-30.0097	NaN	0.236312	NaN	NaN	NaN	NaN	NaN	NaN	NaN		0.257882	0.223475	0.661769	0.43386	0.390474	0.523401	0.450227	0.43501	0.455363	0.489529	0.365272	NaN	NaN	NaN	NaN	NaN	NaN	0.466997	0.369769	0.254632	0.626106	0.297977	0.440729	0.470548	0.361775	0.398524	0.151737	0.317139	0.240702	0.260622	0.298786	0.302519	NaN	NaN	NaN	NaN	NaN	NaN	NaN
-29.9129	NaN	0.219525	NaN	NaN	NaN	NaN	NaN	NaN	NaN		0.222381	0.321404	0.427088	0.50971	0.420779	0.685217	0.625667	0.490401	0.704741	0.476826	0.541919	NaN	NaN	NaN	NaN	NaN	NaN	0.42081	0.324578	0.268452	0.610141	0.20169	0.276113	0.477888	0.490871	0.522487	0.109553	0.307558	0.405626	0.320066	0.322375	0.24715	NaN	NaN	NaN	NaN	NaN	NaN	NaN
-29.8161	NaN	0.271889	NaN	NaN	NaN	NaN	NaN	NaN	NaN		0.19667	0.439639	0.145178	0.578148	0.473798	0.666168	0.52169	0.481983	0.513751	0.446541	0.466218	NaN	NaN	NaN	NaN	NaN	NaN	0.423756	0.359193	0.356409	0.56524	0.276988	0.246935	0.507775	0.516372	0.524278	0.301324	0.161869	0.252645	0.288778	0.392611	0.256325	NaN	NaN	NaN	NaN	NaN	NaN	NaN
-29.7193	NaN	0.282685	NaN	NaN	NaN	NaN	NaN	NaN	NaN		0.17225	0.320643	0.480856	0.485456	0.538076	0.541	0.362646	0.543422	0.398371	0.434822	0.422863	NaN	NaN	NaN	NaN	NaN	NaN	0.45066	0.392478	0.433231	0.581918	0.299038	0.349877	0.500034	0.571519	0.569109	0.219793	0.333514	0.169241	0.175549	0.113219	0.237854	NaN	NaN	NaN	NaN	NaN	NaN	NaN
-29.6225	NaN	0.324024	NaN	NaN	NaN	NaN	NaN	NaN	NaN		0.186139	0.280322	0.723016	0.487755	0.643806	0.607148	0.511415	0.619567	0.489457	0.477486	0.522439	NaN	NaN	NaN	NaN	NaN	NaN	0.454934	0.360774	0.394674	0.327077	0.214592	0.717061	0.417035	0.685959	0.700018	0.171634	0.3077	0.264092	0.266	0.286045	0.460517	NaN	NaN	NaN	NaN	NaN	NaN	NaN
-29.5257	NaN	0.274988	NaN	NaN	NaN	NaN	NaN	NaN	NaN		0.276647	0.397355	0.778141	0.455084	0.556049	0.566094	0.369856	0.563812	0.4822	0.379999	0.445975	NaN	NaN	NaN	NaN	NaN	NaN	0.46544	0.327015	0.323283	0.195296	0.221592	0.533592	0.358915	0.558012	0.577405	0.175409	0.321835	0.237321	0.309742	0.377589	0.410442	NaN	NaN	NaN	NaN	NaN	NaN	NaN
-29.4288	NaN	0.294162	NaN	NaN	NaN	NaN	NaN	NaN	NaN		0.250922	0.321143	0.530467	0.551704	0.505029	0.58635	0.595803	0.547751	0.649898	0.624088	0.595877	NaN	NaN	NaN	NaN	NaN	NaN	0.444409	0.293412	0.304129	0.282662	0.274316	0.0747971	0.313235	0.308872	0.328029	0.128594	0.18287	0.272553	0.337476	0.336234	0.35239	NaN	NaN	NaN	NaN	NaN	NaN	NaN
-29.332	NaN	0.259643	NaN	NaN	NaN	NaN	NaN	NaN	NaN		0.16708	0.148308	0.131394	0.40841	0.356042	0.437521	0.42774	0.386334	0.524802	0.546472	0.452754	NaN	NaN	NaN	NaN	NaN	NaN	0.310139	0.257076	0.379052	0.424019	0.23291	0.149266	0.294814	0.482251	0.5294	0.107572	0.131217	0.414404	0.190621	0.298482	0.399856	NaN	NaN	NaN	NaN	NaN	NaN	NaN
-29.2352	NaN	0.286582	NaN	NaN	NaN	NaN	NaN	NaN	NaN		0.232027	0.278221	0.290392	0.551961	0.593591	0.47871	0.578569	0.657633	0.588017	0.645455	0.411801	NaN	NaN	NaN	NaN	NaN	NaN	0.330558	0.232749	0.323261	0.395276	0.161303	0.245536	0.280914	0.50716	0.564089	0.0988538	0.309808	0.318891	0.297362	0.397352	0.262718	NaN	NaN	NaN	NaN	NaN	NaN	NaN
-29.1384	NaN	0.271044	NaN	NaN	NaN	NaN	NaN	NaN	NaN		0.25158	0.381107	0.34242	0.399976	0.453657	0.307168	0.307752	0.39524	0.325501	0.253995	0.378778	NaN	NaN	NaN	NaN	NaN	NaN	0.308645	0.288692	0.375671	0.369283	0.0292931	0.385406	0.276054	0.235129	0.265414	0.201582	0.092034	0.277601	0.280835	0.372683	0.388931	NaN	NaN	NaN	NaN	NaN	NaN	NaN
-29.0416	NaN	0.252314	NaN	NaN	NaN	NaN	NaN	NaN	NaN		0.180348	0.429942	0.180507	0.463607	0.403802	0.445574	0.465175	0.518594	0.499337	0.365724	0.610164	NaN	NaN	NaN	NaN	NaN	NaN	0.34316	0.371151	0.61838	0.481092	0.0477938	0.383537	0.214707	0.110172	0.135226	0.229324	0.241718	0.309904	0.228233	0.175396	0.374529	NaN	NaN	NaN	NaN	NaN	NaN	NaN
-28.9448	NaN	0.237073	NaN	NaN	NaN	NaN	NaN	NaN	NaN		0.338259	0.377983	0.328968	0.623224	0.621259	0.585617	0.668079	0.629692	0.619641	0.55451	0.622794	NaN	NaN	NaN	NaN	NaN	NaN	0.403782	0.394178	0.705297	0.452625	0.14155	0.310797	0.125116	0.0587514	0.08928	0.180715	0.350556	0.183655	0.252278	0.305946	0.345401	NaN	NaN	NaN	NaN	NaN	NaN	NaN
-28.848	NaN	0.225092	NaN	NaN	NaN	NaN	NaN	NaN	NaN		0.610741	0.275626	0.632615	0.585342	0.59305	0.53551	0.438134	0.619352	0.5736	0.618022	0.411266	NaN	NaN	NaN	NaN	NaN	NaN	0.38415	0.365063	0.537306	0.432005	0.189385	0.148096	0.213127	0.488284	0.533204	0.166412	0.0550003	0.203633	0.215712	0.32524	0.37349	NaN	NaN	NaN	NaN	NaN	NaN	NaN
-28.7512	NaN	0.221252	NaN	NaN	NaN	NaN	NaN	NaN	NaN		0.697326	0.265396	0.308806	0.534285	0.472932	0.53078	0.487068	0.663985	0.465035	0.490538	0.35055	NaN	NaN	NaN	NaN	NaN	NaN	0.413615	0.330571	0.385479	0.404173	0.260769	0.073005	0.247156	0.762976	0.810885	0.0778414	0.23637	0.238134	0.259894	0.332427	0.255139	NaN	NaN	NaN	NaN	NaN	NaN	NaN
-28.6544	NaN	0.225723	NaN	NaN	NaN	NaN	NaN	NaN	NaN		0.738036	0.262548	0.166728	0.396874	0.582473	0.411543	0.481005	0.413295	0.477351	0.455315	0.576751	NaN	NaN	NaN	NaN	NaN	NaN	0.423747	0.451803	0.358531	0.314276	0.379254	0.173135	0.17322	0.727987	0.756077	0.241144	0.312169	0.320669	0.276631	0.315576	0.347575	NaN	NaN	NaN	NaN	NaN	NaN	NaN
-28.5576	NaN	0.2106	NaN	NaN	NaN	NaN	NaN	NaN	NaN		0.686994	0.274462	0.388112	0.480523	0.60012	0.391116	0.490453	0.508423	0.444515	0.403376	0.428269	NaN	NaN	NaN	NaN	NaN	NaN	0.432322	0.559301	0.365994	0.365415	0.439371	0.22196	0.198168	0.498134	0.491302	0.222654	0.28022	0.323169	0.292931	0.287422	0.196065	NaN	NaN	NaN	NaN	NaN	NaN	NaN
-28.4608	NaN	0.214672	NaN	NaN	NaN	NaN	NaN	NaN	NaN		0.59715	0.318234	0.464146	0.572182	0.648723	0.604459	0.565769	0.573414	0.469091	0.51908	0.51368	NaN	NaN	NaN	NaN	NaN	NaN	0.432145	0.571765	0.459053	0.418049	0.470305	0.245134	0.272559	0.170849	0.121544	0.279201	0.307671	0.370035	0.246094	0.344756	0.400016	NaN	NaN	NaN	NaN	NaN	NaN	NaN
-28.364	NaN	0.165727	NaN	NaN	NaN	NaN	NaN	NaN	NaN		0.487905	0.377935	0.467506	0.565308	0.564585	0.444707	0.521334	0.430871	0.513656	0.513284	0.521248	NaN	NaN	NaN	NaN	NaN	NaN	0.368089	0.393441	0.522794	0.41269	0.225973	0.347999	0.198725	0.401643	0.362317	0.244595	0.371395	0.254356	0.295191	0.275809	0.361497	0.373045	0.0191	0.242596	0.477998	0.470721	0.450568	0.319656
-28.2672	NaN	0.211924	0.390816	NaN	NaN	NaN	NaN	NaN	NaN		0.49902	0.299241	0.436353	0.617384	0.452814	0.531848	0.5062	0.420687	0.41104	0.387941	0.383745	NaN	NaN	NaN	NaN	NaN	NaN	0.40146	0.301785	0.498081	0.459763	0.0671749	0.395802	0.204425	0.545534	0.496485	0.150263	0.199984	0.238516	0.247701	0.257454	0.354227	0.260053	0.0298496	0.252589	0.682816	0.345875	0.401954	0.386937
-28.1704	NaN	0.246395	0.448885	NaN	NaN	NaN	NaN	NaN	NaN		0.532386	0.273128	0.473511	0.466409	0.517877	0.540131	0.558695	0.484585	0.399905	0.629749	0.421901	NaN	NaN	NaN	NaN	NaN	NaN	0.515795	0.417763	0.540854	0.640455	0.0794469	0.333482	0.36919	0.51562	0.417443	0.238026	0.432584	0.266344	0.288936	0.450585	0.3272	0.414784	0.362529	0.101724	0.39776	0.394099	0.320286	0.267699
-28.0736	NaN	0.296786	0.398928	NaN	NaN	NaN	NaN	NaN	NaN		0.610251	0.352178	0.647294	0.538026	0.604856	0.495911	0.518107	0.506268	0.442463	0.430761	0.560927	NaN	NaN	NaN	NaN	NaN	NaN	0.479755	0.438108	0.428549	0.659653	0.191431	0.281051	0.416244	0.431049	0.36208	0.225154	0.503827	0.280845	0.29212	0.255126	0.232501	0.20865	0.254017	0.750047	0.525841	0.451475	0.604916	0.304691
-27.9768	NaN	0.260845	0.467425	NaN	NaN	NaN	NaN	NaN	NaN		0.565349	0.31547	0.612633	0.52663	0.602317	0.377402	0.441188	0.422804	0.457526	0.450769	0.479182	NaN	NaN	NaN	NaN	NaN	NaN	0.409294	0.436465	0.270377	0.461536	0.353272	0.233565	0.404441	0.319149	0.318557	0.16159	0.409808	0.316313	0.289892	0.328118	0.248038	0.364807	0.190199	0.264682	0.541856	0.344905	0.244512	0.296063
-27.88	NaN	0.259401	0.416092	NaN	NaN	NaN	NaN	NaN	NaN		0.459065	0.220883	0.473751	0.464498	0.418519	0.446651	0.392208	0.354786	0.481627	0.464739	0.495271	NaN	NaN	NaN	NaN	0.0910846	0.165505	0.424799	0.417936	0.229777	0.317793	0.364468	0.349656	0.200527	0.197259	0.214522	0.213374	0.321039	0.319736	0.28973	0.242526	0.395313	0.0508925	0.281266	0.27059	0.773726	0.568906	0.199858	0.361412
-27.7832	NaN	0.235127	0.455847	NaN	NaN	NaN	NaN	NaN	NaN		0.434719	0.172977	0.349128	0.626765	0.529256	0.565708	0.503993	0.535915	0.515149	0.564517	0.52168	NaN	NaN	NaN	NaN	0.163587	0.239945	0.487371	0.420389	0.240759	0.282781	0.319764	0.352045	0.123517	0.208096	0.243123	0.23375	0.275156	0.187076	0.28451	0.359058	0.269189	0.212383	0.264585	0.447428	0.791655	0.274329	0.337404	0.508332
-27.6864	NaN	0.218854	0.398347	NaN	NaN	NaN	NaN	NaN	NaN		0.422309	0.19112	0.281147	0.39518	0.481444	0.405001	0.512548	0.42533	0.459089	0.496791	0.57454	NaN	NaN	NaN	NaN	0.0982868	0.0798017	0.46219	0.355448	0.241743	0.294989	0.163258	0.127033	0.300312	0.484389	0.536995	0.132868	0.304865	0.382997	0.389987	0.393491	0.217312	0.219942	0.25965	0.374202	0.82043	0.577868	0.529407	0.398
-27.5895	NaN	0.235137	0.352804	NaN	NaN	NaN	NaN	NaN	NaN		0.433772	0.341363	0.32645	0.508778	0.506699	0.449973	0.410483	0.442243	0.451943	0.439437	0.467661	NaN	NaN	NaN	NaN	0.103154	0.115115	0.487704	0.288425	0.254856	0.374054	0.0861493	0.103928	0.256259	0.472885	0.510637	0.076667	0.226823	0.342439	0.327859	0.388686	0.366637	0.198826	0.283861	0.15328	0.0520179	0.277418	-0.031817	0.490504
-27.4927	NaN	0.245004	0.386566	NaN	NaN	NaN	NaN	NaN	NaN		0.555028	0.336853	0.386785	0.613038	0.592794	0.522635	0.475974	0.474539	0.482355	0.453077	0.561806	NaN	NaN	NaN	NaN	0.514441	-0.00142409	0.642408	0.232576	0.336393	0.441438	0.0487383	0.181775	0.101781	0.317483	0.324164	-0.000628243	0.286353	0.372965	0.343705	0.358909	0.444786	0.295399	0.177188	0.305578	0.44174	0.203074	0.559257	0.466811
-27.3959	NaN	0.324687	0.369293	NaN	NaN	NaN	NaN	NaN	NaN		0.73118	0.254966	0.454635	0.677496	0.523655	0.554975	0.589578	0.596725	0.608796	0.49611	0.584946	NaN	NaN	NaN	NaN	0.239004	0.127387	0.599705	0.204347	0.414751	0.379112	0.242219	0.55622	0.100737	0.705269	0.719938	0.124848	0.209177	0.39859	0.282788	0.355581	0.375797	0.366552	0.371074	0.392478	0.618539	0.406578	0.316238	0.278997
-27.2991	NaN	0.328019	0.488902	NaN	NaN	NaN	NaN	NaN	NaN		0.728507	0.216287	0.517374	0.5604	0.537493	0.456992	0.503572	0.456074	0.486898	0.494059	0.460599	NaN	0.0820621	0.549288	0.0148947	0.312361	0.117254	0.484121	0.239498	0.502964	0.470525	0.377325	0.702307	0.0638676	0.827981	0.829422	0.0397539	0.398688	0.352445	0.363179	0.295711	0.242234	0.124334	0.326186	0.430529	0.555012	0.283324	0.152057	0.0934391
-27.2023	NaN	0.319098	0.394545	NaN	NaN	NaN	NaN	NaN	NaN		0.6915	0.154061	0.472046	0.562081	0.573311	0.460216	0.504027	0.464763	0.514807	0.541386	0.643797	NaN	0.405427	0.34992	0.139889	0.510226	0.243584	0.53251	0.353707	0.553809	0.605515	0.395682	0.391677	-0.0446544	0.420544	0.366325	0.165695	0.464564	0.322246	0.289548	0.330629	0.295022	0.165181	0.286403	0.191365	0.635321	0.219832	0.513053	0.771557
-27.1055	NaN	0.335359	0.391669	NaN	NaN	NaN	NaN	NaN	NaN		0.585826	0.0447397	0.210582	0.39107	0.457741	0.439858	0.400879	0.328882	0.391556	0.406052	0.365709	NaN	0.233529	0.4515	0.0711307	0.178094	0.276648	0.619866	0.311667	0.480241	0.481919	0.343557	0.171007	-0.0743301	0.340814	0.324873	0.221626	0.381682	0.330815	0.319459	0.441513	0.346036	0.382342	0.236732	0.415768	0.645387	0.380705	0.113642	0.418185
-27.0087	NaN	0.289007	0.297134	NaN	NaN	NaN	NaN	NaN	NaN		0.517784	0.0462161	0.205689	0.597218	0.489116	0.500049	0.353845	0.455486	0.519535	0.415045	0.559723	NaN	0.30134	0.587694	0.153846	0.347395	0.298652	0.466824	0.345213	0.355992	0.421659	0.256191	-0.00468392	-0.0645828	0.424939	0.494244	0.281761	0.364974	0.340351	0.276144	0.400863	0.391695	0.327722	0.127946	0.209073	0.260051	0.337142	0.350307	0.371806
-26.9119	NaN	0.306734	0.356413	NaN	NaN	NaN	NaN	NaN	NaN		0.468557	0.103091	0.32908	0.630107	0.573202	0.47583	0.580192	0.557048	0.598203	0.615984	0.625221	NaN	0.470271	0.158543	0.0912086	0.441435	0.245563	0.370161	0.368297	0.371676	0.533046	0.333878	0.183082	0.109885	0.132465	0.107332	0.162851	0.433175	0.396593	0.291524	0.33979	0.246194	0.223087	0.577833	0.355288	0.451401	0.0717586	0.436063	0.241218
-26.8151	NaN	0.309378	0.388327	NaN	NaN	NaN	NaN	NaN	NaN		0.47379	0.129414	0.344263	0.465225	0.546728	0.377834	0.411417	0.399459	0.561423	0.394696	0.547886	NaN	0.260659	0.147547	0.021352	0.485755	0.258559	0.39707	0.364994	0.333549	0.583132	0.367734	0.285536	0.271946	0.00781226	-0.0598443	0.184602	0.303576	0.320987	0.345775	0.333057	0.320132	0.109457	0.420443	-0.0369471	0.406124	0.295894	0.349342	0.223772
-26.7183	NaN	0.29747	0.392064	NaN	NaN	NaN	NaN	NaN	NaN		0.450957	0.137811	0.358524	0.43165	0.553209	0.48926	0.406396	0.41924	0.49415	0.51021	0.497137	NaN	0.508302	0.303209	0.0667478	0.3144	0.106022	0.493249	0.318406	0.348964	0.461131	0.313927	0.217365	0.409193	0.2188	0.212452	0.0407135	0.258778	0.280837	0.339432	0.370357	0.316448	0.180717	0.374041	0.319534	0.250577	0.387043	0.372287	0.198844
-26.6215	NaN	0.300326	0.339819	NaN	NaN	NaN	NaN	NaN	NaN		0.371991	0.110356	0.37094	0.623596	0.603599	0.501521	0.56951	0.427006	0.474297	0.594444	0.54596	NaN	0.47217	0.302348	0.0890999	0.158192	0.203289	0.47196	0.267688	0.418302	0.338376	0.280642	0.176456	0.286825	0.299698	0.300336	0.284207	0.298381	0.271063	0.241483	0.362854	0.272227	0.311848	0.455423	0.418692	0.500429	0.306747	0.56544	0.387053
-26.5247	NaN	0.347623	0.439012	NaN	NaN	NaN	NaN	NaN	NaN		0.311321	0.0689326	0.377973	0.686163	0.503329	0.530632	0.448954	0.464169	0.570951	0.547958	0.503942	NaN	0.737898	0.0691625	0.0317633	0.592188	0.1757	0.432091	0.302175	0.452926	0.402004	0.257619	0.149177	0.0346495	0.315551	0.296014	0.102015	0.457808	0.339543	0.319917	0.337288	0.246628	0.140434	0.12079	0.093073	0.453758	0.575609	0.39459	0.42439
-26.4279	NaN	0.311812	0.353613	NaN	NaN	NaN	NaN	NaN	NaN		0.259799	0.0205244	0.382313	0.593294	0.632077	0.522345	0.505142	0.48195	0.550844	0.471758	0.53444	NaN	0.600257	0.289777	0.14103	0.264229	0.210332	0.50504	0.391276	0.394621	0.536628	0.182065	0.327112	0.0902173	0.334871	0.349602	0.188445	0.397331	0.219746	0.267678	0.310786	0.307914	0.227184	0.438364	0.175441	0.129208	0.221543	0.557064	0.336305
-26.3311	NaN	0.331184	0.354843	NaN	NaN	NaN	NaN	NaN	NaN		0.289391	0.01213	0.40616	0.592102	0.666031	0.487833	0.406738	0.524436	0.499547	0.617142	0.579657	NaN	0.450997	0.5984	0.366728	0.184107	0.252001	0.645695	0.392723	0.382008	0.502968	0.17829	0.454177	0.130912	0.357282	0.386453	0.131304	0.371444	0.256592	0.299546	0.320971	0.386243	0.319499	0.236657	0.127779	0.437981	0.341638	0.0343397	0.526248
-26.2343	NaN	0.317961	0.338205	NaN	NaN	NaN	NaN	NaN	NaN		0.276553	0.0275429	0.376041	0.647104	0.693944	0.484224	0.604892	0.593213	0.662727	0.606374	0.59646	NaN	0.231266	0.560562	0.571189	0.441998	0.38732	0.664763	0.353188	0.413526	0.41423	0.318072	0.479502	0.14186	0.385878	0.389832	0.187215	0.399123	0.277045	0.323992	0.391072	0.400661	0.191645	0.321091	0.209569	0.522465	0.546331	0.278024	0.101875
-26.1375	NaN	0.302597	0.357534	NaN	NaN	NaN	NaN	NaN	NaN		0.178857	0.0905704	0.237992	0.514559	0.567954	0.508397	0.526012	0.475137	0.50075	0.576416	0.650425	NaN	0.348678	0.956435	0.77754	0.0266601	0.286765	0.581392	0.355337	0.359019	0.417071	0.33977	0.474957	0.275354	0.46383	0.467348	0.175126	0.315283	0.385043	0.333944	0.320739	0.31166	0.0429689	0.650748	0.336221	0.671399	0.390304	0.294173	0.211559
-26.0407	NaN	0.299136	0.37203	NaN	NaN	NaN	NaN	NaN	NaN		0.240924	0.128469	0.122628	0.532666	0.619279	0.482336	0.536676	0.523994	0.533071	0.43798	0.460568	NaN	0.562558	0.337588	0.766377	0.421748	0.0986955	0.545412	0.332618	0.343477	0.59449	0.302427	0.455475	0.47012	0.56646	0.581931	0.144861	0.288168	0.438197	0.316304	0.407571	0.285632	0.17662	0.472213	0.164998	0.654317	0.195486	0.653431	0.369001
-25.9439	NaN	0.302964	0.346075	NaN	NaN	NaN	NaN	NaN	NaN		0.382874	0.153804	0.0186057	0.582542	0.532797	0.40353	0.500367	0.439759	0.385472	0.475076	0.40822	NaN	0.385775	0.123478	0.697444	0.865011	0.225303	0.469348	0.357741	0.353121	0.589407	0.256422	0.237007	0.256856	0.284873	0.292015	0.166635	0.333616	0.334733	0.309424	0.447112	0.339022	0.125585	0.201761	0.476852	0.425841	0.105828	0.272288	0.542107
-25.847	NaN	0.274732	0.296192	NaN	NaN	NaN	NaN	NaN	NaN		0.37297	0.130438	0.337304	0.464124	0.387049	0.403847	0.443493	0.397026	0.401991	0.470696	0.337847	NaN	0.154204	0.573451	0.888278	0.393279	0.490932	0.454851	0.330213	0.374148	0.358122	0.266804	0.137187	0.131619	0.192487	0.21158	0.140074	0.389546	0.278802	0.275704	0.292266	0.311385	0.254055	0.311369	0.368145	0.358405	0.458638	0.351382	0.194171
-25.7502	NaN	0.296224	0.289515	NaN	NaN	NaN	NaN	NaN	NaN		0.354551	0.1136	0.456384	0.485314	0.479841	0.381084	0.431055	0.394491	0.478425	0.470919	0.477113	NaN	0.413494	0.386966	0.721423	0.537024	0.344298	0.510912	0.237523	0.318766	0.353928	0.389961	0.274665	0.182438	0.478506	0.550109	0.27488	0.417364	0.365337	0.316845	0.361966	0.419919	0.171101	0.511132	0.408171	0.569062	0.288959	0.460928	0.416546
-25.6534	NaN	0.303368	0.295824	NaN	NaN	NaN	NaN	NaN	NaN		0.319103	0.109821	0.176224	0.514666	0.510885	0.357151	0.424204	0.385232	0.478941	0.389275	0.484733	NaN	0.252603	0.803523	0.767576	0.649091	0.619812	0.504233	0.263408	0.255719	0.471195	0.251236	0.253242	0.172966	0.485624	0.556946	0.288613	0.401708	0.347006	0.338642	0.292579	0.274922	0.216272	0.387637	0.298114	0.193482	0.256472	0.376045	0.418071
-25.5566	NaN	0.293206	0.287359	NaN	NaN	NaN	NaN	NaN	NaN		0.315395	0.13624	0.215263	0.502647	0.449189	0.44148	0.458544	0.394217	0.416521	0.38977	0.476813	NaN	0.249362	0.511838	0.739314	0.458323	0.388845	0.581119	0.33237	0.322461	0.461282	-0.0184316	0.152369	0.133348	0.353292	0.397936	0.200419	0.32138	0.371568	0.273299	0.376428	0.368275	0.222433	0.376508	0.0824299	0.408822	0.590925	0.373548	0.160526
-25.4598	NaN	0.250409	0.255447	NaN	NaN	NaN	NaN	NaN	NaN		0.327557	0.177757	0.413901	0.585956	0.481595	0.440249	0.429582	0.441372	0.496288	0.432336	0.424555	NaN	0.465544	0.369596	0.826233	0.372498	0.417061	0.571089	0.396368	0.398211	0.488581	0.148003	0.341925	0.168212	0.143058	0.168582	0.116051	0.250796	0.382136	0.410373	0.463887	0.447767	0.269016	0.348623	0.465061	0.292758	0.934057	0.578795	0.194017
-25.363	NaN	0.273278	0.271815	NaN	NaN	NaN	NaN	NaN	NaN		0.352354	0.225903	0.237313	0.576961	0.498312	0.482517	0.569394	0.544564	0.522621	0.530155	0.613403	NaN	0.481776	0.310559	0.651537	0.440755	0.672642	0.483499	0.435658	0.38322	0.62289	0.270669	0.406259	0.201757	0.0707585	0.0770474	0.195443	0.456234	0.358356	0.335831	0.343728	0.312926	0.216538	0.274463	0.0863767	0.56271	0.418911	0.485814	0.39368
-25.2662	NaN	0.239247	0.209047	NaN	NaN	NaN	NaN	NaN	NaN		0.339928	0.244965	0.233908	0.490864	0.499363	0.418824	0.442095	0.50221	0.435613	0.477984	0.439156	NaN	0.467422	0.222418	0.622406	0.563642	0.429159	0.508535	0.464063	0.392419	0.549201	0.305801	0.22015	0.232663	0.27433	0.261153	0.279868	0.429018	0.399951	0.357697	0.380841	0.384514	0.0761336	0.484422	0.465763	0.811373	0.85714	0.179408	0.569117
-25.1694	NaN	0.231845	0.233883	NaN	NaN	NaN	NaN	NaN	NaN		0.253055	0.205859	0.57687	0.370726	0.286793	0.353184	0.308686	0.305209	0.324735	0.263146	0.302803	NaN	0.413617	0.397407	0.660673	0.249053	0.41222	0.561032	0.424048	0.337938	0.287324	0.246756	0.234232	0.223412	0.23887	0.236388	0.209147	0.456288	0.370198	0.356079	0.436073	0.24862	0.0947476	0.495719	0.0624579	0.761512	0.112995	-0.00254741	0.259035
-25.0726	NaN	0.206767	0.20633	NaN	NaN	NaN	NaN	NaN	NaN		0.26451	0.133907	0.496638	0.48562	0.420154	0.444798	0.453242	0.37033	0.468219	0.418695	0.415158	NaN	0.530865	0.120192	0.637844	0.468944	0.341844	0.578253	0.446573	0.46104	0.391461	0.140622	0.34841	0.194081	0.0838943	0.107188	0.242516	0.353505	0.327712	0.284398	0.366037	0.459449	0.132984	0.189364	0.357733	0.266167	0.57728	0.341254	0.644024
-24.9758	NaN	0.274797	0.237129	NaN	NaN	NaN	NaN	NaN	NaN		0.325129	0.0455327	0.204808	0.545422	0.466789	0.398519	0.559027	0.52164	0.437684	0.481438	0.54556	NaN	0.272297	0.290938	0.542482	0.440197	0.463274	0.553351	0.497912	0.461701	0.591774	0.0985104	0.629255	0.163715	0.322057	0.25807	0.119378	0.49625	0.432651	0.34962	0.403569	0.445538	0.174206	0.324956	0.340718	0.604178	0.310355	0.360704	0.312426
-24.879	NaN	0.247799	0.254885	NaN	NaN	NaN	NaN	NaN	NaN		0.408085	0.160488	0.273628	0.460963	0.572819	0.490464	0.540565	0.466829	0.491675	0.480406	0.529967	NaN	0.376997	0.287097	0.536778	0.543849	0.454049	0.468444	0.4158	0.261458	0.568267	0.0863847	0.685233	0.102865	0.476773	0.357031	0.255982	0.239775	0.437036	0.305184	0.373295	0.360765	0.207537	0.455568	0.265903	0.241626	0.529991	0.753322	0.306935
-24.7822	NaN	0.236461	0.222861	NaN	NaN	NaN	NaN	NaN	NaN		0.422018	0.240084	0.365486	0.425151	0.460871	0.438357	0.355445	0.391867	0.413643	0.442824	0.450272	NaN	0.370809	0.344568	0.470037	0.400311	0.256734	0.456234	0.321259	0.316458	0.454366	0.13423	0.291479	-0.0189542	0.464594	0.352148	0.305108	0.347849	0.317137	0.275136	0.413516	0.324573	-0.00831348	-0.0325347	0.188743	0.181322	0.37582	0.385213	0.168735
-24.6854	NaN	0.247798	0.231096	NaN	NaN	NaN	NaN	NaN	NaN		0.297905	0.248963	0.503421	0.39763	0.374362	0.322801	0.376683	0.381189	0.365076	0.380218	0.348227	NaN	0.399632	0.512215	0.373256	0.408616	0.550584	0.536167	0.344444	0.37967	0.578492	0.105735	0.158852	-0.0217616	0.276277	0.260325	0.368262	0.315104	0.320685	0.337643	0.369211	0.398176	-0.00445206	0.0285526	0.272337	0.69363	0.525843	0.228278	0.377166
-24.5886	NaN	0.240715	0.190504	NaN	NaN	NaN	NaN	NaN	NaN		0.183347	0.212823	0.44934	0.487282	0.463589	0.42594	0.414052	0.426962	0.390892	0.420016	0.475363	NaN	0.210748	0.433644	0.532195	0.514428	0.655149	0.620375	0.379809	0.249355	0.561325	0.0390689	0.156789	0.0349367	-0.000109213	0.125033	0.254898	0.378231	0.291556	0.314185	0.284898	0.408809	0.243172	0.22867	0.186145	0.527122	0.316806	0.287613	0.25014
-24.4918	NaN	0.259032	0.188524	NaN	NaN	NaN	NaN	NaN	NaN		0.0735669	0.154174	0.29925	0.396863	0.399305	0.340763	0.361316	0.337412	0.422543	0.392009	0.298154	NaN	0.200307	0.382029	0.428673	0.347625	0.54478	0.608038	0.44843	0.187	0.443769	0.087529	0.319245	0.096133	0.458785	0.443998	0.199231	0.354871	0.359302	0.265158	0.34171	0.451519	0.444666	0.259207	0.100382	0.42217	0.437295	0.137873	0.779809
-24.395	NaN	0.231354	0.206055	NaN	NaN	NaN	NaN	NaN	NaN		0.206695	0.144657	0.496417	0.408592	0.439752	0.369725	0.393279	0.339351	0.406678	0.383491	0.371183	NaN	0.189082	0.462235	0.425268	0.432774	0.623415	0.50235	0.407379	0.356617	0.37702	0.131478	0.421914	0.0962771	0.649335	0.570978	0.152553	0.465828	0.337927	0.317387	0.460617	0.353767	0.127004	-0.216938	0.552031	0.454158	-0.00882757	0.506725	0.412192
-24.2982	NaN	0.245926	0.193007	NaN	NaN	NaN	NaN	NaN	NaN		0.316122	0.127374	0.641265	0.343537	0.33416	0.311942	0.344806	0.282129	0.420061	0.362979	0.357425	NaN	0.571303	0.277159	0.358861	0.0430552	0.380073	0.411497	0.380945	0.325047	0.360263	0.166404	0.405008	-0.0256831	0.303199	0.31399	0.208426	0.406576	0.33271	0.304532	0.314927	0.353209	0.520878	0.302495	0.522414	0.361715	0.573389	0.221952	0.276005
-24.2014	NaN	0.247368	0.224091	NaN	NaN	NaN	NaN	NaN	NaN		0.378147	0.0945589	0.681475	0.446098	0.539755	0.447421	0.469827	0.496166	0.584154	0.439693	0.483966	NaN	0.34771	0.173066	0.337165	0.316605	0.212274	0.456884	0.318774	0.315353	0.391478	0.132245	0.352493	-0.09579	0.227548	0.274129	0.00853049	0.454591	0.405464	0.328127	0.378858	0.308448	0.243769	0.220565	0.29759	0.158071	0.433593	0.255873	0.446307
-24.1045	NaN	0.236576	0.179443	NaN	NaN	NaN	NaN	NaN	NaN		0.3549	0.128044	0.53749	0.351543	0.419844	0.344013	0.45948	0.351296	0.372042	0.430795	0.506396	NaN	0.553526	0.353748	0.430469	0.316707	0.660333	0.474542	0.26773	0.301768	0.411244	0.0635427	0.282174	-0.13997	0.287141	0.342832	0.126447	0.379588	0.291165	0.243334	0.316287	0.333083	0.431387	0.222552	0.134713	0.528892	0.267287	0.61485	0.104628
-24.0077	NaN	0.22343	0.198215	NaN	NaN	NaN	NaN	NaN	NaN		0.289015	0.194679	0.301408	0.357438	0.342645	0.384833	0.434456	0.305692	0.486791	0.411724	0.391237	NaN	0.482186	0.421813	0.315462	0.688338	0.617991	0.533907	0.318221	0.260938	0.438552	0.335477	0.237166	0.156767	0.340325	0.386352	0.333036	0.197252	0.210353	0.198775	0.319615	0.396536	0.483718	0.170941	0.799076	0.429942	0.455273	0.369049	0.342786
-23.9109	NaN	0.219044	0.172013	NaN	NaN	NaN	NaN	NaN	NaN		0.177247	0.146889	0.126417	0.45765	0.474793	0.407795	0.411169	0.440216	0.531259	0.520867	0.528881	NaN	0.375904	0.421451	0.437975	0.359707	0.340219	0.507992	0.339432	0.333942	0.52734	0.408034	0.138504	0.309439	0.383654	0.430552	0.425532	0.414367	0.40126	0.239847	0.272654	0.400717	0.242684	0.192124	0.456469	0.554146	0.202067	0.389421	0.314163
-23.8141	NaN	0.221303	0.176391	NaN	NaN	NaN	NaN	NaN	NaN		0.185357	0.109055	0.0505444	0.408435	0.539015	0.400568	0.435246	0.403646	0.441428	0.45962	0.381266	NaN	0.234562	0.0802872	0.572506	0.294457	0.413813	0.420125	0.335836	0.485025	0.481097	0.0818379	-0.0674659	0.173982	0.40727	0.476111	0.259092	0.239886	0.301476	0.28857	0.404668	0.436469	0.422004	0.38755	0.265156	0.750298	0.312339	0.520517	0.333809
-23.7173	NaN	0.224625	0.180002	NaN	NaN	NaN	NaN	NaN	NaN		0.433221	0.0911303	0.172911	0.321067	0.369804	0.408973	0.347597	0.38062	0.307137	0.436849	0.449805	0.23499	0.496549	0.478838	0.598179	0.588078	0.336954	0.419155	0.381549	0.483031	0.431788	0.0730932	0.180237	0.123805	0.358042	0.374437	0.338416	0.344199	0.318742	0.289735	0.344488	0.496755	0.271395	0.381726	0.30026	0.533509	0.380629	0.365577	0.478929
-23.6205	NaN	0.23638	0.229883	NaN	NaN	NaN	NaN	NaN	NaN		0.483045	0.0690019	0.260972	0.36126	0.465056	0.377864	0.439051	0.428751	0.369661	0.466345	0.353136	0.229358	0.382093	0.509182	0.575402	0.290799	0.424713	0.458294	0.342826	0.404429	0.437603	0.165812	0.298063	0.123482	0.300895	0.32062	0.219141	0.253533	0.414361	0.320279	0.402545	0.414599	0.254745	0.220196	0.383913	0.345245	0.292042	0.23416	0.253165
-23.5237	NaN	0.237603	0.219454	NaN	NaN	NaN	NaN	NaN	NaN		0.43385	0.0447714	0.331882	0.435904	0.448983	0.395332	0.446472	0.450078	0.514076	0.443317	0.430997	0.150355	0.37645	0.695394	0.454449	0.746282	0.547269	0.407905	0.348025	0.382266	0.373758	0.308484	0.339636	0.256656	0.25227	0.306181	0.294313	0.382774	0.36246	0.358703	0.408751	0.404754	0.330513	0.302854	0.184461	0.531302	0.4445	0.380331	0.30024
-23.4269	NaN	0.20713	0.132209	NaN	NaN	NaN	NaN	NaN	NaN		0.569645	0.085744	0.281615	0.33277	0.457575	0.4152	0.452579	0.347758	0.382964	0.352369	0.416874	0.0779253	0.454855	0.732579	0.418964	0.34046	0.403108	0.35835	0.395299	0.425567	0.331102	0.243301	0.374134	0.32128	0.33396	0.372289	0.271471	0.364238	0.402934	0.316658	0.339845	0.379266	0.340283	0.286875	0.42038	0.587469	0.466654	0.210413	0.384941
-23.3301	NaN	0.222852	0.188507	NaN	NaN	NaN	NaN	NaN	NaN		0.528935	0.109443	0.26531	0.356312	0.404823	0.362638	0.397769	0.457215	0.442811	0.410362	0.431417	0.170535	0.352199	0.295218	0.541742	0.203685	0.276518	0.332627	0.320121	0.386768	0.219767	0.218631	0.470897	0.284485	0.453579	0.45347	0.430772	0.347077	0.364476	0.313783	0.258414	0.326151	0.235868	0.309184	0.285502	0.545328	0.251529	0.394267	0.322058
-23.2333	NaN	0.197285	0.176565	NaN	NaN	NaN	NaN	NaN	NaN		0.135213	0.0985967	0.31693	0.407925	0.435632	0.318424	0.418796	0.39297	0.426978	0.422057	0.48298	0.21133	0.676948	0.190739	0.366794	0.637407	0.366317	0.353258	0.392562	0.334939	0.229734	0.226743	0.393759	0.332909	0.354248	0.349	0.344191	0.358148	0.360833	0.2885	0.378081	0.372173	0.253021	0.283851	0.284765	0.44096	0.346399	0.196066	0.137265
-23.1365	NaN	0.228525	0.225007	NaN	0.444087	NaN	NaN	NaN	NaN		0.188241	0.115086	0.25704	0.331129	0.491241	0.393919	0.444594	0.34787	0.429025	0.439846	0.441181	0.0816942	0.724133	0.0870035	0.332505	0.24327	0.505283	0.392866	0.446098	0.408943	0.340371	0.179039	0.167306	0.355725	0.323687	0.318159	0.336567	0.392108	0.425515	0.276699	0.365117	0.304424	0.291659	0.277493	0.374616	0.509183	0.551603	0.375291	0.436982
-23.0397	NaN	0.230973	0.22097	NaN	0.530812	NaN	NaN	NaN	NaN		0.378384	0.18356	0.407072	0.302031	0.421059	0.276241	0.399788	0.325547	0.342765	0.349861	0.322367	0.119713	0.433074	0.267083	0.489353	0.626093	0.325915	0.380559	0.460814	0.379068	0.50584	0.08255	0.218558	0.295696	0.250237	0.23946	0.365154	0.290645	0.331761	0.290146	0.324193	0.264003	0.171114	0.299775	0.297498	0.345684	0.307869	0.282186	0.208245
-22.9429	NaN	0.230861	0.233475	NaN	0.690562	NaN	NaN	NaN	NaN		0.343023	0.14696	0.367644	0.388933	0.350852	0.329418	0.340811	0.344676	0.406103	0.421645	0.315614	0.0277153	0.240226	0.0834399	0.41088	0.504763	0.389568	0.346814	0.459962	0.28206	0.536411	0.158166	0.247433	0.275775	0.195009	0.216972	0.366112	0.258019	0.32771	0.261763	0.301116	0.345644	0.23495	0.278237	0.186878	0.546663	0.462627	0.381439	0.442634
-22.8461	NaN	0.24787	0.24664	NaN	0.507306	NaN	NaN	NaN	NaN		0.325495	0.139262	0.354103	0.340419	0.443487	0.335947	0.38321	0.321724	0.297844	0.327896	0.369683	-0.00943701	0.317363	-0.132085	0.271478	0.583836	0.311121	0.373298	0.449792	0.31889	0.485752	0.224462	0.335988	0.232987	0.217221	0.256672	0.318762	0.405398	0.363107	0.280467	0.297684	0.364052	0.260161	0.333436	0.402436	0.372351	0.437241	0.298339	0.359038
-22.7493	NaN	0.211432	0.227054	NaN	0.490937	NaN	NaN	NaN	NaN		0.343631	0.18937	0.392335	0.372011	0.416329	0.363865	0.350101	0.455762	0.426979	0.369643	0.441933	0.0816788	0.219813	0.77063	0.273309	0.27976	0.330382	0.405795	0.45631	0.424727	0.538088	0.109336	0.344655	0.322348	0.273762	0.291451	0.229443	0.424205	0.21378	0.278005	0.220274	0.31182	0.179802	0.171625	0.409449	0.606416	0.27657	0.225747	0.254831
-22.6525	NaN	0.219405	0.226814	NaN	0.542812	NaN	NaN	NaN	NaN		0.379467	0.159551	0.406998	0.371698	0.433775	0.400349	0.433815	0.377833	0.397394	0.416463	0.3996	0.148669	0.181054	0.484768	0.253174	0.333399	0.292007	0.414457	0.400335	0.468935	0.525996	0.0263763	0.161938	0.274358	0.290872	0.290927	0.33385	0.43596	0.301854	0.375317	0.37853	0.413823	0.286411	0.201097	0.370519	0.3363	0.336002	0.379707	0.271657
-22.5557	NaN	0.215853	0.230374	NaN	0.625617	NaN	NaN	NaN	NaN		0.424155	0.0897701	0.409877	0.329436	0.334332	0.269708	0.29427	0.317071	0.306939	0.364918	0.339853	0.156322	0.2885	0.687136	0.231277	0.449488	0.304221	0.387068	0.353353	0.433465	0.427786	0.0983675	0.137197	0.271275	0.334	0.35679	0.33575	0.41811	0.36109	0.31609	0.473916	0.327076	0.202225	0.251963	0.272826	0.449776	0.392941	0.437939	0.347087
-22.4589	NaN	0.203468	0.190125	NaN	0.671464	NaN	NaN	NaN	NaN		0.465064	0.0857178	0.372942	0.490474	0.43987	0.377788	0.33106	0.492158	0.410862	0.404669	0.496156	0.154165	0.49288	0.0361808	0.246109	0.374962	0.274545	0.33953	0.323939	0.359201	0.371914	0.187659	0.196831	0.320127	0.519036	0.515695	0.316888	0.516615	0.463267	0.407776	0.408676	0.293855	0.250141	0.308129	0.266446	0.496763	0.424561	0.310216	0.295364
-22.3621	NaN	0.147676	0.145057	NaN	0.777767	NaN	NaN	NaN	NaN		0.497054	0.100402	0.380986	0.430872	0.331628	0.37446	0.392074	0.36848	0.347422	0.444967	0.328613	0.287943	0.587237	0.284915	0.223987	0.398062	0.250796	0.260052	0.349134	0.322458	0.441764	0.0994293	0.268305	0.271633	0.596037	0.562025	0.288796	0.471037	0.309997	0.314857	0.351141	0.420807	0.160123	0.282854	0.295905	0.382291	0.200943	0.472123	0.18582
-22.2652	NaN	0.175386	0.167928	NaN	0.547545	NaN	NaN	NaN	NaN		0.511208	0.152561	0.478985	0.429713	0.415506	0.389774	0.394051	0.420356	0.406444	0.36534	0.336218	0.16131	0.364695	0.277378	0.189753	0.2843	0.182452	0.25408	0.427999	0.38574	0.530377	0.119774	0.353256	0.433444	0.4957	0.488352	0.274245	0.417594	0.369529	0.364017	0.343235	0.346827	0.232041	0.194895	0.189777	0.617723	0.229588	0.396248	0.313343
-22.1684	NaN	0.164485	0.171485	NaN	0.575091	NaN	NaN	NaN	NaN		0.461729	0.166428	0.468138	0.384956	0.402525	0.278436	0.377354	0.27451	0.391555	0.341852	0.365398	0.109644	0.641125	0.54227	0.190833	0.225746	0.0827875	0.299985	0.457523	0.407018	0.476398	0.271412	0.493142	0.575698	0.420457	0.375075	0.345866	0.40526	0.251815	0.320532	0.339147	0.391034	0.279845	0.284439	0.199846	0.49742	0.257938	0.252773	0.260403
-22.0716	NaN	0.168794	0.150022	NaN	0.537713	NaN	NaN	NaN	NaN		0.380434	0.16115	0.402868	0.374659	0.325526	0.332745	0.342938	0.33129	0.353085	0.304941	0.424468	0.1173	0.558574	0.450268	0.184145	0.278638	0.267343	0.288822	0.382098	0.304894	0.494207	0.333785	0.538489	0.295386	0.447558	0.358668	0.358549	0.316406	0.347213	0.320306	0.256047	0.312612	0.268922	0.197538	0.221621	0.484527	0.523642	0.392269	0.253206
-21.9748	NaN	0.189982	0.251416	NaN	0.621547	NaN	NaN	NaN	NaN		0.320933	0.176159	0.392591	0.398435	0.372964	0.337472	0.360768	0.355119	0.364058	0.404348	0.40406	0.31227	0.217244	0.311552	0.145145	0.116422	0.229496	0.247493	0.357517	0.248597	0.491905	0.416798	0.443482	0.380155	0.517421	0.493688	0.466148	0.288383	0.308808	0.271254	0.447472	0.304022	0.0517208	0.321487	0.379667	0.599381	0.272798	0.380622	0.371759
-21.878	NaN	0.200332	0.25185	NaN	0.448434	NaN	NaN	NaN	NaN		0.32062	0.162397	0.381118	0.361463	0.397159	0.339868	0.2977	0.382435	0.305403	0.425145	0.410724	0.172473	0.375756	0.391315	0.178414	0.246085	0.146618	0.270995	0.374441	0.243036	0.469654	0.413889	0.314209	0.366371	0.417482	0.434282	0.533919	0.420868	0.276939	0.299849	0.355517	0.268558	0.192527	0.362826	0.301451	0.453511	0.327844	0.463009	0.315712
-21.7812	NaN	0.226159	0.222893	NaN	0.68659	NaN	NaN	NaN	NaN		0.438681	0.0910914	0.367251	0.484925	0.361036	0.308202	0.339198	0.353328	0.323646	0.4112	0.384795	0.0644	0.648714	0.562894	0.143029	0.368138	0.123786	0.315258	0.389167	0.277194	0.537348	0.362116	0.4204	0.431634	0.309067	0.337975	0.376328	0.394358	0.323279	0.335373	0.279021	0.252446	0.344136	0.279293	0.252427	0.444872	0.434984	0.278642	0.444015
-21.6844	NaN	0.204776	0.187481	NaN	0.666789	NaN	NaN	NaN	NaN		0.447391	0.0643165	0.303374	0.38465	0.465972	0.359203	0.332252	0.381894	0.323393	0.370512	0.396665	0.0793146	0.527151	0.332256	0.0669182	0.281567	0.389656	0.286794	0.41265	0.273219	0.449178	0.297131	0.410629	0.427804	0.22881	0.254447	0.430789	0.408783	0.30849	0.385971	0.326062	0.334186	0.198827	0.303088	0.353645	0.50424	0.376222	0.248771	0.513578
-21.5876	NaN	0.184447	0.150967	NaN	0.682702	NaN	NaN	NaN	NaN		0.401425	0.059807	0.214492	0.422697	0.467697	0.329836	0.357116	0.28342	0.372848	0.353753	0.312029	0.0624024	0.335945	0.0898064	0.173963	0.169523	0.303243	0.250995	0.339694	0.216198	0.326512	0.324666	0.545608	0.461247	0.423911	0.45836	0.500999	0.329037	0.29655	0.288006	0.276047	0.324946	0.209962	0.201957	0.252095	0.582814	0.299164	0.408058	0.485894
-21.4908	NaN	0.172442	0.179726	NaN	0.713078	NaN	NaN	NaN	NaN		0.24056	0.133367	0.314305	0.321498	0.365374	0.390745	0.308609	0.285797	0.334066	0.318572	0.311056	0.0891457	0.540816	0.306937	0.0883023	0.339913	0.253023	0.346077	0.328024	0.262666	0.437259	0.361753	0.585286	0.59934	0.506807	0.540916	0.406858	0.425073	0.383744	0.274919	0.331398	0.408979	0.151373	0.262652	0.223806	0.504355	0.359363	0.21935	0.407543
-21.394	NaN	0.170403	0.186322	NaN	0.648407	NaN	NaN	NaN	NaN		0.153522	0.169609	0.346678	0.295217	0.27269	0.238046	0.31273	0.278763	0.20288	0.372749	0.331128	0.1997	0.305514	0.14208	0.105286	0.0609474	0.219991	0.364817	0.376022	0.379797	0.573057	0.399083	0.497287	0.764754	0.401065	0.389165	0.443468	0.377508	0.361391	0.357915	0.456913	0.267642	0.176915	0.275325	0.368939	0.614062	0.331462	0.367964	0.384348
-21.2972	NaN	0.161424	0.146058	NaN	0.805593	NaN	NaN	NaN	NaN		0.221386	0.122527	0.233142	0.308336	0.460457	0.274195	0.354462	0.319817	0.367671	0.275267	0.318122	0.148927	0.735714	0.262252	0.0998044	0.187179	0.237143	0.311689	0.409931	0.379483	0.420461	0.406112	0.514944	0.719143	0.356093	0.318375	0.293386	0.375237	0.424396	0.360023	0.303622	0.361101	0.212321	0.330666	0.338848	0.485229	0.43705	0.591246	0.388108
-21.2004	NaN	0.173488	0.180013	NaN	0.711163	NaN	NaN	NaN	NaN		0.235158	0.116351	0.300456	0.35689	0.433605	0.377047	0.359951	0.407304	0.383411	0.445073	0.403796	0.129464	0.287177	0.160184	0.292952	0.364838	0.208503	0.299809	0.408266	0.338382	0.398025	0.313469	0.571052	0.684599	0.343536	0.32727	0.400981	0.383488	0.363258	0.388028	0.346934	0.28591	0.188217	0.251781	0.171146	0.488437	0.226549	0.342398	0.462273
-21.1036	NaN	0.151096	0.109417	NaN	0.660338	NaN	NaN	NaN	NaN		0.181197	0.0954912	0.370609	0.347827	0.392987	0.390605	0.351043	0.439754	0.35469	0.385168	0.458684	0.0263583	0.26571	0.385401	0.42885	0.0880258	0.123297	0.323213	0.388837	0.26045	0.523577	0.279343	0.616638	0.738187	0.324715	0.343327	0.478654	0.401194	0.374017	0.295108	0.326288	0.260703	0.228524	0.323912	0.290197	0.4336	0.386524	0.529857	0.333743
-21.0068	NaN	0.156372	0.119245	NaN	0.724407	NaN	NaN	NaN	NaN		0.137214	0.111681	0.342441	0.206257	0.233268	0.222401	0.224992	0.241633	0.277796	0.213395	0.178147	0.0546079	0.377974	0.355226	0.444894	0.433046	0.0801786	0.320526	0.418733	0.372797	0.501623	0.318741	0.520048	0.619113	0.302405	0.290756	0.522425	0.38875	0.369293	0.381967	0.360474	0.390842	0.16647	0.344064	0.248528	0.606877	0.296657	0.183104	0.265132
-20.91	NaN	0.215105	0.144408	NaN	0.752175	NaN	NaN	NaN	NaN		0.1667	0.146904	0.297694	0.32341	0.354223	0.242311	0.27003	0.324393	0.344403	0.345594	0.360662	0.183463	0.423758	0.344259	0.501327	0.323933	0.147235	0.336922	0.472941	0.467069	0.356752	0.328614	0.578671	0.465657	0.362987	0.316317	0.609725	0.404379	0.39447	0.300805	0.234214	0.373316	0.248242	0.442118	0.30361	0.325405	0.355984	0.320148	0.492908
-20.8132	NaN	0.184306	0.112334	NaN	0.791042	NaN	NaN	NaN	NaN		0.264796	0.142406	0.24254	0.38198	0.376953	0.301465	0.320584	0.311534	0.31561	0.261585	0.377311	0.101853	0.498856	0.270766	0.578308	0.403295	0.12623	0.387934	0.445578	0.399523	0.331763	0.41336	0.597526	0.669247	0.484491	0.450372	0.522656	0.304375	0.378178	0.439548	0.341388	0.390555	0.202093	0.29775	0.25874	0.518048	0.333405	0.30363	0.425709
-20.7164	NaN	0.194495	0.154848	NaN	0.758734	NaN	NaN	NaN	NaN		0.319332	0.124408	0.181324	0.323878	0.309056	0.259237	0.382455	0.275619	0.342662	0.344374	0.314058	0.214317	0.418376	0.147566	0.591032	0.225912	0.160925	0.34425	0.423668	0.382711	0.349192	0.453225	0.555685	0.862537	0.488981	0.465623	0.794227	0.307616	0.431301	0.349495	0.346222	0.331695	0.323187	0.332266	0.314816	0.453466	0.442885	0.339613	0.343562
-20.6196	NaN	0.188701	0.159713	NaN	0.765679	NaN	NaN	NaN	NaN		0.301696	0.152732	0.148404	0.318071	0.326866	0.217795	0.335824	0.357016	0.282219	0.390555	0.329989	0.209937	0.172227	0.0615652	0.497256	0.184233	0.134227	0.279378	0.391813	0.306529	0.353995	0.495539	0.716736	0.690858	0.4513	0.438356	0.765903	0.295139	0.304297	0.290006	0.359661	0.364509	0.260336	0.306982	0.243981	0.508546	0.4722	0.476508	0.340612
-20.5227	NaN	0.175519	0.153469	NaN	0.881577	NaN	NaN	NaN	NaN		0.379651	0.150291	0.264147	0.276904	0.341961	0.317877	0.299896	0.290891	0.252392	0.33619	0.304114	0.128625	0.620495	0.132408	0.442591	0.410198	0.292551	0.318262	0.387223	0.244596	0.284551	0.540609	0.656749	0.616661	0.475161	0.448216	0.696189	0.285207	0.300025	0.323066	0.282212	0.29151	0.2757	0.369058	0.342679	0.499611	0.344556	0.412255	0.392584
-20.4259	NaN	0.183134	0.113961	NaN	0.7914	NaN	NaN	NaN	NaN		0.496163	0.120603	0.349905	0.484859	0.448824	0.412842	0.460183	0.464618	0.485277	0.421284	0.360442	0.102047	0.572021	0.193396	0.354416	0.411333	0.22278	0.320269	0.430808	0.28459	0.233626	0.522805	0.598027	0.600831	0.345528	0.302588	0.665478	0.359147	0.362219	0.26698	0.309111	0.335788	0.313998	0.2937	0.352945	0.600794	0.423647	0.431699	0.156422
-20.3291	NaN	0.204532	0.124756	NaN	0.815246	NaN	NaN	NaN	NaN		0.434212	0.10814	0.214844	0.346974	0.399182	0.269459	0.33265	0.334556	0.307654	0.299703	0.39481	0.086353	0.335391	0.475249	0.392783	0.554581	0.241162	0.276165	0.462125	0.28242	0.400327	0.41915	0.645731	0.739815	0.409259	0.417963	0.558025	0.327796	0.313365	0.368762	0.31275	0.295791	0.306052	0.311622	0.490092	0.479396	0.322135	0.327316	0.243519
-20.2323	NaN	0.179054	0.125572	NaN	0.671811	NaN	NaN	NaN	NaN		0.314425	0.120969	0.183229	0.281841	0.369786	0.307772	0.29911	0.267617	0.301408	0.44733	0.32037	0.110184	0.279977	0.199618	0.452713	0.253384	0.161196	0.325686	0.469557	0.354401	0.48688	0.320071	0.692189	0.982394	0.548859	0.596834	0.393175	0.256125	0.28641	0.350092	0.260271	0.338193	0.436767	0.25463	0.291802	0.507469	0.349081	0.487231	0.325615
-20.1355	NaN	0.170648	0.108178	NaN	0.637248	NaN	NaN	NaN	NaN		0.204373	0.158441	0.370082	0.32424	0.270857	0.252728	0.291755	0.286601	0.307892	0.360786	0.362726	0.176672	0.211403	0.5232	0.387604	0.217445	0.258736	0.319855	0.453567	0.595455	0.381988	0.372715	0.614458	0.888248	0.615053	0.651592	0.43855	0.343485	0.330746	0.330542	0.304143	0.278294	0.374832	0.336287	0.360955	0.37028	0.266563	0.455698	0.294464
-20.0387	NaN	0.187297	0.148325	NaN	0.676151	NaN	NaN	NaN	NaN		0.191644	0.128066	0.395576	0.443931	0.490631	0.362512	0.358117	0.427069	0.462083	0.406454	0.450841	0.130668	0.224813	0.27116	0.354446	0.110085	0.149701	0.280993	0.484001	0.595221	0.298143	0.351349	0.582624	0.72854	0.51623	0.544618	0.454295	0.345133	0.366876	0.383329	0.34759	0.349651	0.352936	0.361983	0.375376	0.512863	0.217423	0.405033	0.388855
-19.9419	NaN	0.158851	0.142507	NaN	0.721155	NaN	NaN	NaN	NaN		0.233487	0.0842685	0.308843	0.342615	0.398674	0.345054	0.381227	0.36785	0.376907	0.379276	0.398832	0.240896	0.431718	0.343766	0.311845	0.306089	0.176879	0.198893	0.498809	0.448186	0.301742	0.231977	0.674423	0.717513	0.430213	0.450751	0.53862	0.28053	0.343315	0.358677	0.339659	0.427813	0.414405	0.24888	0.408135	0.442106	0.266434	0.470278	0.295198
-19.8451	NaN	0.160311	0.100744	NaN	0.616821	NaN	NaN	NaN	NaN		0.232624	0.101663	0.281288	0.345428	0.314258	0.3007	0.2444	0.284218	0.310569	0.370693	0.365261	0.294784	0.730041	0.0798606	0.325625	0.313181	0.114767	0.301794	0.440068	0.48083	0.536746	0.285506	0.703416	0.572646	0.530258	0.528077	0.594767	0.209073	0.346883	0.348259	0.379218	0.342309	0.400184	0.329462	0.335149	0.439009	0.179122	0.412717	0.397238
-19.7483	NaN	0.189932	0.163583	NaN	0.672314	NaN	NaN	NaN	NaN		0.18402	0.138517	0.305301	0.385319	0.366725	0.320127	0.326766	0.285441	0.395055	0.382335	0.36245	0.233143	0.56571	0.419973	0.246766	0.409762	0.224638	0.35859	0.476426	0.42084	0.705728	0.39636	0.62586	0.438351	0.403213	0.344789	0.434338	0.298009	0.303339	0.371872	0.397588	0.314927	0.319074	0.223811	0.357842	0.469501	0.307386	0.463284	0.351492
-19.6515	NaN	0.161181	0.137412	NaN	0.753105	NaN	NaN	NaN	NaN		0.239161	0.114394	0.437698	0.443429	0.397392	0.345608	0.368051	0.387296	0.460052	0.371736	0.38629	0.259601	0.468648	0.287649	0.281084	0.21146	0.273299	0.313617	0.510942	0.290733	0.473963	0.361672	0.560591	0.502135	0.177616	0.139434	0.492454	0.274217	0.396499	0.383835	0.3001	0.393995	0.359785	0.263941	0.505997	0.434299	0.298365	0.464835	0.442146
-19.5547	NaN	0.180877	0.132887	NaN	0.639639	NaN	NaN	NaN	NaN		0.237101	0.120177	0.30508	0.433011	0.416927	0.358849	0.327473	0.389633	0.458784	0.394002	0.420827	0.258628	0.5037	0.337282	0.235091	0.339711	0.239161	0.329824	0.509475	0.338291	0.354722	0.307842	0.577913	0.55515	0.250144	0.252795	0.50093	0.260911	0.468343	0.336845	0.332587	0.281379	0.319356	0.259245	0.29266	0.475856	0.336424	0.403147	0.654081
-19.4579	NaN	0.150144	0.0899408	NaN	0.643185	NaN	NaN	NaN	NaN		0.180526	0.106988	0.206966	0.452249	0.430279	0.353478	0.402744	0.41662	0.426797	0.379091	0.392859	0.341516	0.690619	0.494894	0.261023	0.251076	0.228806	0.325674	0.480569	0.455456	0.491532	0.275017	0.634243	0.594171	0.383684	0.385692	0.379724	0.296858	0.318333	0.359761	0.422857	0.401197	0.286214	0.230026	0.378432	0.540731	0.332049	0.427727	0.29983
-19.3611	NaN	0.202422	0.127864	NaN	0.755931	NaN	NaN	NaN	NaN		0.163117	0.115546	0.249999	0.392359	0.346231	0.405442	0.366958	0.321811	0.418051	0.439261	0.368287	0.281584	0.378179	0.287474	0.217414	0.189646	0.122401	0.320889	0.431759	0.375649	0.511076	0.287025	0.57916	0.507871	0.405262	0.424521	0.467147	0.235789	0.416071	0.360726	0.345395	0.314668	0.430853	0.285813	0.340756	0.542577	0.26434	0.344517	0.372613
-19.2643	NaN	0.203246	0.172809	NaN	0.642449	NaN	NaN	NaN	NaN		0.244282	0.113864	0.287037	0.49158	0.497903	0.448874	0.49221	0.365853	0.415762	0.43872	0.390306	0.311011	0.464654	0.454788	0.193012	0.211245	0.250833	0.357067	0.434624	0.356245	0.27621	0.252811	0.501573	0.44366	0.546922	0.540486	0.284691	0.361441	0.331622	0.336084	0.421873	0.30494	0.310594	0.41945	0.319186	0.585484	0.447135	0.478261	0.415741
-19.1675	NaN	0.209589	0.105083	NaN	0.732777	NaN	NaN	NaN	NaN		0.270014	0.0938454	0.250007	0.392702	0.34519	0.356255	0.40063	0.337401	0.383468	0.351916	0.382043	0.292508	0.174825	0.242535	0.221213	0.359057	0.179864	0.375691	0.456083	0.372803	0.32289	0.223487	0.580701	0.459475	0.599488	0.550737	0.472375	0.393575	0.347127	0.388137	0.331657	0.341251	0.468494	0.346717	0.387112	0.541917	0.428574	0.344958	0.46596
-19.0707	NaN	0.203255	0.117345	NaN	0.691622	NaN	NaN	NaN	NaN		0.256347	0.0784945	0.191851	0.455796	0.364888	0.327659	0.363054	0.300487	0.40535	0.420144	0.37405	0.290881	0.221253	0.460743	0.198976	0.390302	0.185101	0.435969	0.513154	0.363871	0.516188	0.23889	0.450772	0.424286	0.514228	0.477577	0.506828	0.31184	0.389678	0.386123	0.315389	0.353377	0.290787	0.319847	0.285578	0.604314	0.401703	0.339842	0.452687
-18.9739	NaN	0.221827	0.113701	NaN	0.622808	NaN	NaN	NaN	NaN		0.259183	0.0759868	0.214553	0.322537	0.38512	0.297704	0.31303	0.318525	0.316418	0.350979	0.369337	0.195746	0.266103	0.300667	0.230708	0.157751	0.0843114	0.440967	0.491313	0.437512	0.452753	0.226948	0.295457	0.306108	0.39505	0.362458	0.437009	0.382096	0.458276	0.427371	0.388381	0.374155	0.341634	0.357365	0.336065	0.620932	0.489078	0.415031	0.443147
-18.8771	NaN	0.182216	0.109751	NaN	0.666153	NaN	NaN	NaN	NaN		0.289156	0.127164	0.27903	0.380902	0.369473	0.329996	0.335711	0.31439	0.333928	0.330439	0.317936	0.161112	0.283685	0.263064	0.182291	0.24782	0.190246	0.384903	0.410356	0.457521	0.380165	0.235165	0.421433	0.327713	0.297931	0.260886	0.474383	0.378417	0.464557	0.418064	0.393581	0.447647	0.388483	0.441186	0.441085	0.44816	0.456999	0.497219	0.474143
-18.7803	NaN	0.195157	0.112571	NaN	0.606417	NaN	NaN	NaN	NaN		0.334466	0.151686	0.278839	0.338962	0.468631	0.363674	0.349461	0.295856	0.375846	0.371566	0.316679	0.285012	0.500865	0.219664	0.176546	0.202245	0.26597	0.328773	0.446353	0.454267	0.542133	0.226576	0.583112	0.367809	0.319439	0.268204	0.393	0.372031	0.448704	0.418202	0.378667	0.339098	0.353491	0.31143	0.405995	0.526724	0.499536	0.370504	0.520999
-18.6834	NaN	0.184062	0.107016	NaN	0.582298	NaN	NaN	NaN	NaN		0.233451	0.151086	0.288886	0.301022	0.389197	0.332851	0.314349	0.295455	0.388777	0.323906	0.225212	0.138081	0.288612	0.439117	0.161038	0.310559	0.222143	0.293824	0.520105	0.51266	0.534002	0.170707	0.5685	0.332765	0.305886	0.26949	0.418083	0.436061	0.394739	0.331709	0.349589	0.407658	0.394586	0.437341	0.317178	0.585042	0.399714	0.359208	0.558853
-18.5866	NaN	0.184634	0.117197	NaN	0.666412	NaN	NaN	NaN	NaN		0.177035	0.164657	0.320307	0.335081	0.296871	0.315685	0.296142	0.335871	0.30926	0.311544	0.315962	0.224491	0.137217	0.324349	0.193161	0.284481	0.224136	0.339617	0.53107	0.415933	0.46023	0.137144	0.556635	0.346773	0.350495	0.359277	0.456433	0.504363	0.439213	0.392789	0.402739	0.374986	0.317583	0.359897	0.430004	0.528158	0.472574	0.516236	0.351905
-18.4898	NaN	0.178376	0.147486	NaN	0.577572	NaN	NaN	NaN	NaN		0.197164	0.196469	0.32017	0.461425	0.479918	0.428553	0.380764	0.387862	0.464002	0.412661	0.411217	0.191033	0.242742	-0.0654124	0.20961	0.268362	0.351982	0.346291	0.516813	0.263551	0.440822	0.162353	0.602047	0.391501	0.46795	0.523773	0.493467	0.478122	0.479276	0.507666	0.450558	0.440717	0.345172	0.371025	0.374976	0.493471	0.443056	0.350849	0.433106
-18.393	NaN	0.20783	0.11487	NaN	0.601751	NaN	NaN	NaN	NaN		0.22949	0.147809	0.222704	0.315023	0.377853	0.314719	0.352942	0.399914	0.357759	0.245578	0.342578	0.23142	0.381052	0.2621	0.191935	0.189369	0.139102	0.324263	0.534295	0.257962	0.390091	0.26652	0.607076	0.420357	0.48138	0.540267	0.644945	0.41253	0.35216	0.405356	0.439614	0.403818	0.347709	0.425634	0.366608	0.510258	0.352927	0.430571	0.452641
-18.2962	NaN	0.187589	0.114375	NaN	0.688373	NaN	NaN	NaN	NaN		0.280812	0.0781226	0.131011	0.323789	0.375727	0.292818	0.340605	0.273145	0.331612	0.290579	0.303773	0.204709	0.372438	0.22727	0.215675	0.175491	0.237304	0.318018	0.469346	0.265471	0.347783	0.279408	0.588468	0.43253	0.367134	0.391247	0.752363	0.468313	0.488527	0.417118	0.40867	0.331423	0.265641	0.44813	0.349528	0.519403	0.468172	0.337717	0.374479
-18.1994	NaN	0.181953	0.124114	NaN	0.70616	NaN	NaN	NaN	NaN		0.364914	0.0931933	0.120324	0.379195	0.39916	0.330907	0.298852	0.415635	0.378631	0.380814	0.396146	0.128962	0.330708	0.267965	0.241169	0.324771	0.288329	0.314176	0.396918	0.206788	0.49426	0.303143	0.394245	0.433448	0.278398	0.272534	0.595112	0.44132	0.504493	0.362005	0.40437	0.370762	0.382822	0.282957	0.300056	0.535197	0.437121	0.326264	0.300798
-18.1026	NaN	0.163876	0.122739	NaN	0.665667	NaN	NaN	NaN	NaN		0.38227	0.126025	0.122118	0.450037	0.345701	0.34928	0.346835	0.395267	0.374901	0.44942	0.352597	0.151867	0.461852	0.188787	0.165089	0.344242	0.185871	0.364733	0.36495	0.170891	0.551652	0.288705	0.317673	0.365817	0.367702	0.353126	0.473367	0.379612	0.405273	0.392159	0.416669	0.330106	0.313673	0.382936	0.337857	0.503778	0.296775	0.496621	0.37427
-18.0058	NaN	0.170196	0.0944777	NaN	0.740268	NaN	NaN	NaN	NaN		0.382599	0.1387	0.184456	0.404078	0.435798	0.415348	0.3943	0.393004	0.432988	0.39562	0.440419	0.119226	0.596708	0.405069	0.189661	0.370743	0.237477	0.391932	0.338046	0.256328	0.511185	0.234655	0.364191	0.319249	0.383112	0.363472	0.534657	0.448951	0.518581	0.42002	0.460597	0.429492	0.30989	0.268203	0.336649	0.486296	0.527575	0.407063	0.246434
-17.909	NaN	0.151275	0.113174	NaN	0.631284	NaN	NaN	NaN	NaN		0.43527	0.185005	0.274971	0.342241	0.432357	0.410693	0.422617	0.412632	0.371499	0.369654	0.345637	0.186089	0.383306	0.293752	0.170378	0.364343	0.275291	0.356843	0.3915	0.344473	0.446162	0.294622	0.203318	0.32522	0.501945	0.46357	0.466058	0.385894	0.411819	0.388885	0.415469	0.365529	0.360558	0.298414	0.379292	0.406412	0.39363	0.434092	0.427489
-17.8122	NaN	0.166978	0.100989	NaN	0.543494	NaN	NaN	NaN	NaN		0.48651	0.202352	0.286739	0.409404	0.485077	0.402067	0.468387	0.410945	0.462583	0.396663	0.36288	0.147191	0.377	0.23364	0.15114	0.420638	0.211546	0.290292	0.427778	0.334777	0.296594	0.286739	0.210095	0.374608	0.545371	0.470574	0.502757	0.426431	0.502709	0.445324	0.397975	0.382351	0.293077	0.312527	0.402873	0.510133	0.407776	0.332683	0.388086
-17.7154	NaN	0.160279	0.105591	NaN	0.599365	NaN	NaN	NaN	NaN		0.468472	0.157813	0.292915	0.439392	0.564595	0.346008	0.417985	0.468044	0.511825	0.504647	0.459761	0.151239	0.341719	0.264299	0.187627	0.196316	0.184007	0.216069	0.408486	0.432969	0.371815	0.202422	0.522668	0.418348	0.512993	0.479575	0.389965	0.470524	0.45253	0.446646	0.445631	0.410358	0.254411	0.245252	0.363917	0.522413	0.304966	0.425937	0.300136
-17.6186	0.543965	0.226814	0.248081	NaN	0.688024	NaN	0.402774	NaN	NaN		0.418431	0.16559	0.32743	0.442033	0.478732	0.397979	0.437648	0.397689	0.384727	0.429821	0.459801	0.0963134	0.467753	0.202211	0.204782	0.242915	0.23867	0.210355	0.355906	0.497378	0.440988	0.180521	0.469503	0.397074	0.534807	0.523028	0.293498	0.344357	0.430904	0.363363	0.347714	0.311521	0.219906	0.239104	0.303396	0.496255	0.283926	0.342544	0.379605
-17.5218	0.614307	0.228848	0.217756	NaN	0.542698	NaN	0.391492	NaN	NaN		0.36456	0.15554	0.340536	0.393521	0.463406	0.415361	0.445321	0.442925	0.498045	0.441354	0.444906	0.177557	0.347977	0.309825	0.0850615	0.172105	0.246655	0.253226	0.351263	0.479961	0.433965	0.149611	0.365572	0.360917	0.480777	0.435159	0.309326	0.403809	0.45372	0.462908	0.424901	0.454645	0.277791	0.226596	0.274419	0.501646	0.387754	0.358741	0.391889
-17.425	0.590293	0.250469	0.277576	NaN	0.467235	NaN	0.34742	NaN	NaN		0.405787	0.116055	0.306223	0.342192	0.402796	0.370343	0.405355	0.40388	0.437255	0.390943	0.338423	0.191955	0.189891	0.0927771	0.159857	0.378004	0.218141	0.285397	0.395638	0.426628	0.456833	0.242875	0.451498	0.32563	0.47495	0.386456	0.293668	0.360565	0.437229	0.45463	0.372764	0.390861	0.227435	0.276997	0.340494	0.419925	0.338881	0.397385	0.395679
-17.3282	0.69101	0.25063	0.289919	NaN	0.59942	NaN	0.352028	NaN	NaN		0.377934	0.109555	0.248413	0.426178	0.405568	0.344608	0.395552	0.357752	0.403106	0.393411	0.380874	0.184247	0.346734	0.248443	0.153598	0.250009	0.265367	0.316919	0.428561	0.284769	0.412598	0.306356	0.528394	0.386501	0.491061	0.408896	0.361891	0.39419	0.430717	0.378298	0.415016	0.313478	0.242258	0.288121	0.272928	0.373573	0.324509	0.427306	0.395767
-17.2314	0.588615	0.23312	0.262108	NaN	0.642209	NaN	0.390297	NaN	NaN		0.264342	0.111306	0.264921	0.334705	0.49957	0.386427	0.398773	0.372439	0.334477	0.447671	0.370608	0.147953	0.436604	0.301727	0.329582	0.199777	0.185511	0.313446	0.405113	0.277043	0.426467	0.343923	0.482252	0.488704	0.437508	0.444099	0.333897	0.331506	0.402879	0.413063	0.432269	0.36422	0.318271	0.293614	0.316482	0.421296	0.241458	0.381897	0.376003
-17.1346	0.585997	0.214315	0.244308	NaN	0.600983	NaN	0.49589	NaN	NaN		0.345721	0.168375	0.295767	0.362883	0.438843	0.337713	0.428525	0.399028	0.40303	0.387102	0.402728	0.196425	0.704544	0.172058	0.282395	0.107242	0.237471	0.231972	0.411095	0.426286	0.442527	0.329395	0.472811	0.351237	0.381146	0.37413	0.378868	0.410849	0.380273	0.432698	0.40539	0.375907	0.262364	0.303299	0.317064	0.447907	0.372287	0.367312	0.304953
-17.0378	0.596507	0.24681	0.282621	NaN	0.663668	NaN	0.584769	NaN	NaN		0.423296	0.189361	0.312855	0.383606	0.43995	0.33108	0.372835	0.428036	0.453196	0.375327	0.43604	0.213697	0.562336	0.358939	0.369743	0.157008	0.258166	0.187836	0.392784	0.529005	0.465172	0.328739	0.478806	0.297897	0.334037	0.301115	0.392698	0.423933	0.456279	0.425662	0.391595	0.455681	0.255419	0.279193	0.301711	0.458056	0.215949	0.406327	0.358617
-16.9409	0.678335	0.250603	0.31684	NaN	0.509143	NaN	0.665292	NaN	NaN		0.468785	0.133423	0.337399	0.304527	0.397414	0.299525	0.311313	0.331682	0.350522	0.376523	0.343315	0.286869	0.127562	0.301499	0.368399	0.237136	0.254538	0.242442	0.34227	0.453769	0.528266	0.307871	0.492748	0.401816	0.50302	0.485671	0.343808	0.421468	0.446208	0.452716	0.447105	0.398371	0.288421	0.347101	0.259899	0.389904	0.303817	0.350365	0.343195
-16.8441	0.566301	0.253605	0.270569	NaN	0.516707	NaN	0.313525	NaN	NaN		0.497035	0.155737	0.369274	0.443839	0.485593	0.412545	0.454087	0.45919	0.402331	0.458108	0.45898	0.204885	0.255213	0.229201	0.611832	0.236126	0.160839	0.362805	0.338312	0.399355	0.542005	0.289194	0.456312	0.481781	0.67324	0.663788	0.387838	0.358719	0.410632	0.470366	0.401226	0.408049	0.341852	0.277685	0.425056	0.474899	0.315611	0.341507	0.371071
-16.7473	0.676769	0.242661	0.28692	NaN	0.504812	NaN	0.182437	NaN	NaN		0.415567	0.186264	0.401154	0.506509	0.489815	0.458375	0.549327	0.418788	0.484024	0.550112	0.544185	0.167928	0.303139	0.174192	0.568559	0.261774	0.27794	0.400912	0.398507	0.405478	0.459623	0.277492	0.485845	0.517949	0.558969	0.506462	0.373853	0.335658	0.40551	0.454425	0.386599	0.38102	0.314766	0.395852	0.329716	0.444505	0.312162	0.395581	0.353263
-16.6505	0.578377	0.244643	0.264108	NaN	0.332702	NaN	0.492709	NaN	NaN		0.474967	0.153435	0.380367	0.363282	0.471611	0.374335	0.397143	0.386982	0.389375	0.453095	0.415687	0.220082	0.471241	0.604441	0.623097	0.423825	0.229705	0.408642	0.458976	0.329182	0.398773	0.293807	0.517756	0.559691	0.508891	0.479957	0.364022	0.383964	0.412443	0.468447	0.383715	0.43536	0.331966	0.377794	0.388829	0.546701	0.415208	0.345431	0.420357
-16.5537	0.507196	0.22844	0.249686	NaN	0.377969	NaN	0.583346	NaN	NaN		0.516215	0.16642	0.347629	0.392715	0.427666	0.394098	0.389925	0.40256	0.451612	0.384511	0.306249	0.249579	0.290616	0.287359	0.728831	0.333497	0.139234	0.364733	0.430528	0.337938	0.455974	0.322914	0.449439	0.441376	0.579702	0.562998	0.452135	0.37991	0.464131	0.430024	0.458692	0.4852	0.346546	0.292256	0.313353	0.457281	0.334442	0.334437	0.441824
-16.4569	0.428638	0.228463	0.237844	NaN	0.627945	NaN	0.564166	NaN	NaN		0.521235	0.157436	0.279589	0.357099	0.388808	0.34248	0.335034	0.343323	0.395118	0.317051	0.397682	0.143779	0.37937	0.442942	0.717685	0.466603	0.247944	0.289168	0.426699	0.445276	0.475565	0.28472	0.404298	0.342447	0.583884	0.566808	0.399366	0.361961	0.406246	0.505411	0.411113	0.482158	0.389311	0.337891	0.365012	0.48955	0.338655	0.426767	0.386519
-16.3601	0.499878	0.215069	0.239054	NaN	0.46912	NaN	0.500979	NaN	NaN		0.474797	0.139885	0.308732	0.411927	0.407628	0.36943	0.371452	0.342939	0.392078	0.354821	0.351652	0.206798	0.260279	0.475428	0.703314	0.304993	0.14553	0.321476	0.416859	0.398123	0.460942	0.300429	0.372048	0.350172	0.589078	0.575441	0.179723	0.421162	0.525882	0.489295	0.467213	0.472788	0.322916	0.330098	0.324744	0.53607	0.393747	0.442433	0.357542
-16.2633	0.576885	0.225726	0.270049	NaN	0.274063	NaN	0.382266	0.733074	0.321921		0.501128	0.124279	0.317258	0.30348	0.416797	0.336209	0.408609	0.346662	0.392163	0.332235	0.399452	0.228235	0.688591	0.371821	0.711604	0.317875	0.242999	0.376003	0.416885	0.438296	0.444059	0.336875	0.231661	0.431953	0.653456	0.614905	0.291636	0.395948	0.424928	0.429664	0.396361	0.43966	0.39105	0.356839	0.282534	0.556535	0.396402	0.417629	0.385469
-16.1665	0.51849	0.203655	0.226006	NaN	0.463094	NaN	0.152504	0.723471	0.57009		0.457356	0.134099	0.292255	0.341122	0.305838	0.294178	0.270663	0.253202	0.279058	0.304596	0.30985	0.266043	0.365911	0.318861	0.783768	0.329649	0.293136	0.375639	0.414734	0.395034	0.504133	0.345237	0.273664	0.437774	0.537389	0.490275	0.307245	0.419345	0.389768	0.44954	0.397479	0.471671	0.359132	0.33761	0.301175	0.513076	0.340892	0.343397	0.381417
-16.0697	0.568789	0.202966	0.235	0.832855	0.381587	NaN	0.221389	0.940496	0.745631		0.386609	0.143573	0.386271	0.330181	0.347802	0.317558	0.363143	0.303107	0.315695	0.299298	0.36464	0.216802	0.67819	0.317191	0.671942	0.169814	0.229478	0.375647	0.443308	0.368432	0.504608	0.387873	0.397483	0.380166	0.434395	0.386868	0.48741	0.368864	0.438994	0.474524	0.511073	0.491286	0.366093	0.338042	0.300822	0.461134	0.369444	0.388288	0.346955
-15.9729	0.450613	0.18998	0.202832	0.890829	0.427416	NaN	0.490332	0.496001	0.412015		0.373471	0.139504	0.494155	0.39377	0.394757	0.367946	0.408202	0.39843	0.392386	0.439582	0.425562	0.244384	0.618031	0.591377	0.626125	0.228888	0.198126	0.338849	0.393598	0.442672	0.464855	0.406246	0.38727	0.461044	0.54853	0.472288	0.476896	0.381076	0.466569	0.446171	0.453303	0.482883	0.320234	0.325347	0.288649	0.55074	0.292276	0.41922	0.325365
-15.8761	0.441263	0.188991	0.22058	0.953812	0.489653	NaN	0.421542	0.577379	0.442306		0.329666	0.110118	0.468668	0.407333	0.408507	0.414553	0.514114	0.43456	0.441097	0.440326	0.42398	0.265842	0.472491	0.311515	0.661067	0.150411	0.209203	0.331604	0.330557	0.410998	0.431237	0.413731	0.43921	0.537916	0.575454	0.501656	0.375006	0.379704	0.441355	0.452884	0.428297	0.393445	0.29194	0.275495	0.348718	0.469124	0.280536	0.445204	0.255204
-15.7793	0.369809	0.212595	0.21223	0.880581	0.483435	NaN	0.316278	1.12961	0.51132		0.350286	0.121988	0.327619	0.39712	0.438774	0.328211	0.354517	0.425399	0.350487	0.41487	0.442196	0.241078	0.20984	0.438625	0.573632	0.252068	0.289811	0.334354	0.392246	0.381706	0.388056	0.374489	0.558713	0.49344	0.555619	0.526982	0.267721	0.467526	0.396162	0.451957	0.367256	0.451622	0.283105	0.279001	0.268382	0.503029	0.262027	0.315487	0.291987
-15.6825	0.532243	0.200047	0.233916	0.867922	0.556586	NaN	0.48039	0.503564	0.57507		0.335645	0.143786	0.295849	0.331379	0.364253	0.370955	0.390136	0.338473	0.404785	0.363263	0.403504	0.289807	0.552726	0.469489	0.490447	0.299344	0.302957	0.348409	0.458221	0.41186	0.422647	0.443077	0.38647	0.477789	0.461087	0.438602	0.348743	0.3906	0.433484	0.45628	0.415958	0.441967	0.249282	0.276561	0.246442	0.474478	0.358903	0.423371	0.31941
-15.5857	0.389379	0.192178	0.220703	0.956927	0.48504	NaN	0.52621	0.813596	0.623717		0.277041	0.142928	0.33477	0.428129	0.431435	0.398914	0.478044	0.415347	0.359316	0.488957	0.512701	0.255895	0.287275	0.60329	0.556874	0.322227	0.148472	0.351745	0.408468	0.371776	0.388404	0.483366	0.274424	0.495518	0.374801	0.354479	0.384554	0.41476	0.425598	0.433002	0.466627	0.452727	0.207796	0.315239	0.29096	0.540029	0.340298	0.347714	0.324418
-15.4889	0.432297	0.196376	0.226954	0.964387	0.390817	NaN	0.37745	0.456134	0.309087		0.274485	0.121658	0.36337	0.378104	0.405144	0.395988	0.424806	0.421908	0.394013	0.403441	0.44804	0.279803	0.410915	0.379099	0.515871	0.293312	0.239698	0.314424	0.416115	0.341394	0.384845	0.433507	0.466365	0.518157	0.461612	0.443649	0.326109	0.385719	0.486625	0.499341	0.395657	0.411585	0.269	0.233229	0.28078	0.447467	0.379398	0.344671	0.328753
-15.3921	0.38117	0.1765	0.208535	0.867029	0.332553	NaN	0.509833	0.596627	0.464767		0.2657	0.129723	0.303441	0.361413	0.380105	0.331614	0.406024	0.379035	0.391775	0.38658	0.36238	0.344857	0.446117	0.431243	0.521043	0.305444	0.260599	0.324896	0.367253	0.346543	0.398753	0.388357	0.448841	0.506697	0.611013	0.57276	0.362182	0.40526	0.574195	0.535554	0.499526	0.43042	0.25678	0.331723	0.238027	0.414224	0.391833	0.335082	0.244405
-15.2953	0.507254	0.198047	0.257266	0.763828	0.302661	NaN	0.650774	0.696475	0.48304		0.281929	0.131441	0.279647	0.402202	0.365439	0.338855	0.422797	0.358728	0.397502	0.374956	0.40583	0.397042	0.876558	0.373507	0.462475	0.48016	0.284009	0.321865	0.375151	0.415147	0.416042	0.353813	0.526748	0.463027	0.666603	0.622299	0.259641	0.372328	0.466685	0.504579	0.493858	0.419579	0.253701	0.276686	0.236012	0.49324	0.260653	0.355241	0.302366
-15.1985	0.458609	0.218867	0.240089	0.765132	0.383004	NaN	0.56141	0.444289	0.525908		0.307001	0.130648	0.278672	0.41487	0.411527	0.329667	0.406355	0.42749	0.416414	0.433005	0.375457	0.395867	0.497448	0.239707	0.431924	0.297578	0.345396	0.333493	0.391521	0.516068	0.357793	0.35113	0.523561	0.464684	0.621918	0.59501	0.347418	0.416314	0.489666	0.503818	0.511223	0.4756	0.264594	0.304963	0.32429	0.463829	0.370171	0.369422	0.287578
-15.1016	0.443981	0.20332	0.237005	0.69594	0.487849	NaN	0.540931	0.604448	0.358409		0.316711	0.120732	0.268387	0.449805	0.463012	0.435878	0.418314	0.458553	0.404989	0.381901	0.433459	0.443569	0.19517	0.397807	0.492792	0.216463	0.343619	0.367516	0.390264	0.500189	0.353329	0.408194	0.442275	0.513012	0.613652	0.591777	0.30424	0.421311	0.485592	0.524621	0.457001	0.48912	0.314453	0.35926	0.351228	0.469879	0.37924	0.322202	0.355319
-15.0048	0.443316	0.217274	0.243394	0.734498	0.486768	NaN	0.442344	0.433276	0.34364		0.326476	0.117715	0.254309	0.421288	0.37837	0.387112	0.461375	0.47351	0.417911	0.3926	0.356896	0.453311	0.785089	0.235927	0.465523	0.222888	0.246061	0.341368	0.392534	0.477948	0.419932	0.342703	0.373429	0.474208	0.583404	0.534503	0.328298	0.388713	0.561237	0.518821	0.543808	0.450227	0.349692	0.317503	0.369807	0.54071	0.309484	0.471539	0.413516
-14.908	0.454368	0.178655	0.19092	0.731574	0.538606	NaN	0.387881	0.398139	0.321882		0.298719	0.136033	0.311057	0.567585	0.504566	0.445314	0.488009	0.431429	0.533011	0.475274	0.424611	0.455634	0.420625	0.298075	0.409026	0.188103	0.268349	0.329072	0.383523	0.428918	0.418427	0.302714	0.326783	0.45151	0.503146	0.485263	0.327875	0.448154	0.471648	0.504526	0.482914	0.449645	0.340596	0.249675	0.370511	0.547754	0.374765	0.368691	0.494337
-14.8112	0.394032	0.191403	0.212613	0.808659	0.358504	NaN	0.43062	0.493252	0.300023		0.285613	0.157411	0.316665	0.482795	0.525482	0.435573	0.452798	0.492537	0.461611	0.476991	0.42358	0.369737	0.312087	0.308804	0.313004	0.162931	0.222264	0.335712	0.330484	0.297561	0.367504	0.303285	0.359637	0.355708	0.358413	0.374984	0.302711	0.431553	0.446922	0.536989	0.52343	0.451643	0.305679	0.313518	0.333735	0.518195	0.404653	0.404824	0.395728
-14.7144	0.488304	0.21501	0.229216	0.737004	0.508332	NaN	0.524455	0.58929	0.0546405		0.312679	0.119208	0.256801	0.409268	0.468359	0.390482	0.477333	0.401026	0.465962	0.425487	0.392533	0.404149	0.372661	0.226497	0.321555	0.0864749	0.172825	0.341563	0.30568	0.311407	0.36951	0.303679	0.397434	0.382599	0.351671	0.35146	0.254897	0.336185	0.464758	0.566023	0.521149	0.497719	0.324296	0.32818	0.283018	0.540972	0.439873	0.340263	0.305533
-14.6176	0.536507	0.225186	0.259469	0.655667	0.46462	NaN	0.510623	0.511413	0.472767		0.308386	0.0927571	0.239582	0.42783	0.39865	0.396697	0.492803	0.376454	0.381434	0.389181	0.438688	0.418942	0.390248	0.355199	0.270457	0.296827	0.301399	0.309482	0.298676	0.423424	0.406223	0.298377	0.389307	0.365058	0.336357	0.321334	0.301117	0.421272	0.531712	0.463322	0.548569	0.489024	0.335291	0.291575	0.300096	0.595218	0.379307	0.41941	0.481752
-14.5208	0.454089	0.196266	0.214049	0.75187	0.532813	NaN	0.433079	0.311735	0.370195		0.287678	0.0915013	0.235427	0.399398	0.358947	0.368041	0.364144	0.374153	0.36912	0.346422	0.301879	0.383987	0.442768	0.242667	0.28977	0.37705	0.260276	0.301622	0.345483	0.487113	0.415062	0.310237	0.346538	0.323632	0.329336	0.308468	0.254711	0.394684	0.509981	0.476897	0.450229	0.511599	0.334663	0.342231	0.311939	0.484001	0.290069	0.36716	0.457356
-14.424	0.487549	0.177308	0.200179	0.665489	0.461018	NaN	0.424951	0.403187	0.303834		0.337509	0.118986	0.305821	0.412659	0.403457	0.394585	0.461824	0.404793	0.432596	0.459864	0.421518	0.409391	0.377902	0.32394	0.264776	0.284068	0.216389	0.326209	0.343565	0.466063	0.372224	0.337039	0.305262	0.283678	0.382961	0.363585	0.26199	0.46311	0.512436	0.532751	0.490811	0.469263	0.342522	0.429746	0.353417	0.491197	0.414376	0.395186	0.381926
-14.3272	0.494129	0.182327	0.18737	0.672605	0.494942	NaN	0.460004	0.457173	0.374803		0.379248	0.138911	0.304474	0.38547	0.368966	0.413256	0.33142	0.351051	0.336248	0.359218	0.358857	0.376311	0.494725	0.304157	0.189351	0.111518	0.280503	0.303756	0.326993	0.529217	0.345833	0.377982	0.400522	0.326414	0.323208	0.315659	0.246231	0.462459	0.486628	0.496568	0.505162	0.495864	0.310627	0.331513	0.320217	0.466672	0.375048	0.390044	0.39896
-14.2304	0.505068	0.186239	0.201422	0.702783	0.510719	NaN	0.484365	0.460052	0.395588		0.41502	0.137241	0.247866	0.407235	0.4305	0.41968	0.41826	0.415166	0.443585	0.410657	0.408143	0.33838	0.382559	0.375738	0.21416	0.593236	0.212033	0.249201	0.321242	0.531479	0.300768	0.426194	0.483225	0.309975	0.35468	0.345846	0.212016	0.420695	0.488428	0.549713	0.497009	0.449433	0.320926	0.330086	0.324827	0.620802	0.44048	0.445942	0.486638
-14.1336	0.472976	0.178532	0.196064	0.759806	0.519124	NaN	0.470121	0.37303	0.345266		0.396107	0.130685	0.275737	0.392883	0.393108	0.359166	0.364899	0.320968	0.412838	0.372125	0.314591	0.350451	0.369119	0.240566	0.212791	0.123501	0.221734	0.220275	0.312715	0.438259	0.350784	0.434579	0.456506	0.275124	0.402955	0.379649	0.197941	0.489951	0.54568	0.543111	0.515575	0.545926	0.293417	0.324839	0.375782	0.513123	0.423348	0.347378	0.3507
-14.0368	0.321377	0.1687	0.190124	0.759519	0.486902	NaN	0.494594	0.347289	0.420882		0.36896	0.125498	0.263245	0.324907	0.323445	0.313083	0.316192	0.300194	0.386893	0.313131	0.325539	0.348875	0.354561	0.338515	0.231824	0.218544	0.274324	0.268712	0.342488	0.398934	0.400986	0.359163	0.451847	0.238286	0.388754	0.374533	0.157372	0.508594	0.586538	0.614286	0.486469	0.573683	0.357157	0.288745	0.368789	0.496239	0.451486	0.438013	0.436603
-13.94	0.434135	0.193424	0.210825	0.90591	0.593271	NaN	0.464253	0.485043	0.444594		0.345557	0.128963	0.199685	0.389626	0.349537	0.320044	0.343368	0.318027	0.345461	0.317405	0.376638	0.337399	0.432413	0.285293	0.218311	0.29783	0.210384	0.284217	0.334181	0.467256	0.423514	0.297773	0.407268	0.246436	0.426035	0.394119	0.239015	0.419814	0.508514	0.539662	0.557414	0.440877	0.380503	0.300422	0.417107	0.454523	0.461556	0.480054	0.449517
-13.8432	0.344676	0.195109	0.183683	0.749817	0.514614	NaN	0.449281	0.415764	0.401998		0.351269	0.151845	0.229131	0.387941	0.390307	0.355788	0.399409	0.360737	0.326467	0.356821	0.333347	0.349234	0.307212	0.355066	0.248526	0.23468	0.280242	0.240171	0.314517	0.409942	0.394154	0.294692	0.403191	0.282927	0.441294	0.424176	0.210521	0.460395	0.520166	0.525229	0.507639	0.520899	0.403139	0.391672	0.356146	0.454414	0.33136	0.428003	0.358667
-13.7464	0.323521	0.176094	0.190821	0.809629	0.572747	NaN	0.441685	0.415777	0.352699		0.341509	0.154242	0.28033	0.421158	0.439497	0.438239	0.415772	0.44666	0.434375	0.426215	0.424434	0.366266	0.370793	0.429105	0.281005	0.303703	0.190325	0.277838	0.322004	0.395815	0.396892	0.341358	0.434772	0.284552	0.390219	0.368664	0.197231	0.495034	0.481994	0.538703	0.55788	0.506285	0.361061	0.278148	0.319955	0.526592	0.388247	0.433918	0.266375
-13.6496	0.114792	0.153061	0.151057	0.721105	0.498945	NaN	0.483826	0.426419	0.378205		0.354553	0.125526	0.295617	0.360069	0.392797	0.343144	0.355356	0.333294	0.397409	0.36273	0.354278	0.413933	0.322705	0.375675	0.301124	0.228851	0.259349	0.309154	0.327424	0.453623	0.45898	0.334424	0.39004	0.28048	0.32977	0.298843	0.220824	0.40927	0.505876	0.585456	0.514638	0.462225	0.385932	0.280006	0.325644	0.461041	0.40218	0.392115	0.360285
-13.5528	0.281037	0.187828	0.176288	0.777229	0.521376	NaN	0.545272	0.474003	0.374794		0.359444	0.129859	0.279094	0.405546	0.394103	0.38394	0.360149	0.404099	0.362475	0.367699	0.371316	0.33628	0.39108	0.342322	0.317246	0.277046	0.222271	0.301353	0.353208	0.437629	0.444363	0.327891	0.365459	0.263926	0.329801	0.317127	0.240587	0.445979	0.559697	0.610797	0.585513	0.472764	0.385174	0.358781	0.404927	0.47677	0.402552	0.457536	0.3109
-13.456	0.188019	0.173263	0.153575	0.773982	0.505759	NaN	0.54856	0.421082	0.406921		0.359287	0.14569	0.307162	0.393766	0.420651	0.402062	0.393319	0.409601	0.399654	0.399092	0.389681	0.372614	0.282512	0.338014	0.292024	0.222671	0.182275	0.246962	0.319001	0.361504	0.404964	0.360615	0.420046	0.242944	0.312847	0.300336	0.232898	0.504721	0.565313	0.619852	0.570458	0.553681	0.393042	0.318957	0.32597	0.521564	0.348933	0.421491	0.41343
-13.3591	0.151183	0.157772	0.108374	0.744057	0.537527	NaN	0.528092	0.370532	0.423544		0.39896	0.14408	0.305074	0.336838	0.335901	0.302863	0.307718	0.335671	0.336684	0.32204	0.278921	0.306935	0.372264	0.309113	0.388143	0.31305	0.22508	0.224238	0.33228	0.314372	0.424799	0.35649	0.458548	0.248839	0.338227	0.318038	0.197805	0.467249	0.594245	0.614323	0.608545	0.568591	0.352408	0.324364	0.331863	0.455942	0.383155	0.369156	0.39539
-13.2623	0.250894	0.156671	0.127698	0.636278	0.459806	NaN	0.467821	0.373495	0.324156		0.421421	0.13388	0.288398	0.338595	0.348474	0.334482	0.262984	0.325383	0.337137	0.302471	0.349239	0.376474	0.326576	0.529698	0.408148	0.20284	0.217415	0.264384	0.376768	0.315281	0.426673	0.310058	0.403885	0.253859	0.355692	0.333971	0.151816	0.535127	0.601027	0.627817	0.694086	0.537597	0.378116	0.285753	0.331143	0.504774	0.376139	0.448619	0.365289
-13.1655	0.309394	0.188937	0.141156	0.575123	0.499712	NaN	0.420163	0.350234	0.37493		0.395367	0.141969	0.255771	0.384864	0.322317	0.337825	0.289046	0.302747	0.279631	0.329438	0.292887	0.363966	0.330115	0.289755	0.366454	0.198378	0.213832	0.31801	0.403257	0.36176	0.393323	0.326067	0.328931	0.285717	0.393554	0.390541	0.167645	0.425884	0.50723	0.627846	0.59737	0.463939	0.423373	0.340713	0.328444	0.498494	0.428237	0.432075	0.367773
-13.0687	0.368386	0.199893	0.183831	0.557144	0.397026	NaN	0.426911	0.364518	0.326252		0.364172	0.147978	0.249668	0.31585	0.324967	0.272807	0.251009	0.323801	0.29758	0.327432	0.293837	0.27773	0.346071	0.288619	0.420695	0.31931	0.208313	0.361013	0.394362	0.445598	0.439772	0.346295	0.312286	0.322314	0.420725	0.39782	0.178661	0.522676	0.544638	0.636243	0.610161	0.539688	0.48794	0.348481	0.434978	0.504555	0.370812	0.434079	0.417447
-12.9719	0.163346	0.155202	0.0757671	0.575791	0.563624	NaN	0.417002	0.358707	0.382773		0.329897	0.135214	0.291457	0.398114	0.366926	0.377612	0.336075	0.408463	0.378465	0.357119	0.35619	0.312728	0.341895	0.358128	0.45929	0.274186	0.2201	0.361073	0.409723	0.470019	0.472643	0.380101	0.325838	0.348902	0.406657	0.381345	0.250627	0.546402	0.556579	0.693284	0.686762	0.594072	0.43056	0.385458	0.39477	0.510724	0.375106	0.468165	0.402725
-12.8751	0.278343	0.177693	0.15354	0.493832	0.6738	NaN	0.41606	0.457612	0.406521		0.329249	0.124482	0.309834	0.398798	0.381423	0.390076	0.326916	0.370314	0.383424	0.316336	0.372014	0.312867	0.440139	0.342518	0.47507	0.267267	0.226128	0.361576	0.392293	0.507933	0.419188	0.401085	0.327073	0.384756	0.382818	0.364314	0.263876	0.589804	0.608873	0.72186	0.655509	0.577461	0.394372	0.357382	0.333841	0.442386	0.443241	0.406685	0.399729
-12.7783	0.262882	0.176808	0.199354	0.639799	0.683101	NaN	0.412649	0.393075	0.37363		0.324262	0.125613	0.31571	0.401889	0.418619	0.401339	0.375655	0.478265	0.468711	0.464857	0.408496	0.311075	0.338527	0.401265	0.481213	0.281131	0.183074	0.365318	0.350416	0.496548	0.387777	0.363183	0.372069	0.356715	0.442871	0.40302	0.273901	0.542746	0.646857	0.660482	0.717888	0.567296	0.42251	0.24487	0.406056	0.518453	0.379491	0.42378	0.367089
-12.6815	0.347889	0.180929	0.16862	0.527553	0.58831	NaN	0.40606	0.360336	0.385633		0.3343	0.136141	0.307827	0.367838	0.380338	0.358011	0.336592	0.394434	0.352208	0.35944	0.329484	0.271839	0.360527	0.286655	0.477966	0.266327	0.21404	0.369109	0.331541	0.475259	0.323611	0.361263	0.383088	0.365597	0.520372	0.482864	0.265218	0.564423	0.657046	0.702892	0.731017	0.609541	0.367119	0.337352	0.413613	0.487184	0.43036	0.487094	0.405959
-12.5847	0.374895	0.190621	0.205229	0.533725	0.616449	NaN	0.399661	0.351916	0.396711		0.366222	0.156049	0.296754	0.406318	0.390177	0.358334	0.334267	0.339454	0.37438	0.369634	0.322789	0.220693	0.298647	0.357778	0.431165	0.203029	0.138622	0.339536	0.297907	0.434996	0.328259	0.36041	0.330309	0.380358	0.48074	0.468518	0.24912	0.511192	0.585601	0.623636	0.638949	0.540959	0.370808	0.321003	0.41352	0.524518	0.394626	0.452442	0.451142
-12.4879	0.375574	0.209158	0.19187	0.421659	0.473837	NaN	0.40162	0.400088	0.345462		0.394611	0.132477	0.310225	0.379637	0.366206	0.380727	0.402183	0.376939	0.403438	0.405824	0.368513	0.315498	0.203007	0.324584	0.491826	0.27208	0.182836	0.354681	0.330128	0.39374	0.382415	0.377611	0.369135	0.38015	0.480343	0.47781	0.224945	0.478162	0.591873	0.587245	0.583433	0.488145	0.383635	0.339329	0.425244	0.505569	0.376764	0.465852	0.453334
-12.3911	0.297483	0.207335	0.166218	0.406115	0.591415	NaN	0.404847	0.419469	0.41047		0.371736	0.114336	0.323604	0.415767	0.433406	0.422182	0.412815	0.415494	0.421831	0.447129	0.402082	0.360086	0.427084	0.495478	0.573267	0.340709	0.193038	0.364793	0.354515	0.444768	0.393581	0.396286	0.376649	0.345778	0.440475	0.429707	0.260744	0.541787	0.65754	0.717977	0.66134	0.620997	0.435553	0.340131	0.410272	0.530849	0.411806	0.467983	0.392802
-12.2943	0.263628	0.238851	0.161127	0.445157	0.720125	NaN	0.366891	0.329356	0.352707		0.363892	0.112541	0.347753	0.444175	0.455168	0.376637	0.361332	0.413322	0.391657	0.456538	0.427007	0.330261	0.562511	0.311981	0.478924	0.250937	0.211072	0.316461	0.350561	0.475684	0.434952	0.395161	0.371377	0.340716	0.405325	0.382463	0.244803	0.555065	0.621464	0.708435	0.624139	0.641928	0.431297	0.297229	0.351972	0.466281	0.362518	0.450261	0.464032
-12.1975	0.29894	0.227014	0.154877	0.505701	0.575346	NaN	0.396684	0.396734	0.406558		0.366641	0.120801	0.333199	0.422053	0.456672	0.424844	0.406526	0.456546	0.451791	0.368956	0.429444	0.284925	0.43484	0.329836	0.443141	0.364633	0.187946	0.302704	0.413453	0.505088	0.454738	0.382049	0.40676	0.381258	0.474378	0.448604	0.254731	0.5317	0.581968	0.647919	0.611314	0.673906	0.421667	0.310085	0.344144	0.487627	0.414907	0.446602	0.376358
-12.1007	0.264376	0.219701	0.150381	0.505597	0.67037	NaN	0.450301	0.422664	0.389569		0.352124	0.142457	0.290412	0.410569	0.471793	0.415945	0.398487	0.459069	0.417172	0.461552	0.427484	0.303184	0.424277	0.492319	0.423317	0.258629	0.216394	0.305166	0.453596	0.546202	0.444419	0.373161	0.411451	0.417071	0.475103	0.46958	0.264031	0.502196	0.620227	0.606157	0.613556	0.499588	0.437726	0.364161	0.388008	0.479271	0.394617	0.414563	0.468778
-12.0039	0.289271	0.214169	0.153613	0.416507	0.593301	NaN	0.423165	0.39874	0.42113		0.353366	0.149669	0.283858	0.381318	0.316232	0.398897	0.334243	0.386806	0.385526	0.360283	0.399972	0.278414	0.384372	0.305183	0.401487	0.263331	0.204306	0.293571	0.374385	0.477439	0.49665	0.351766	0.418009	0.410279	0.40729	0.417936	0.237836	0.518675	0.503727	0.580515	0.532442	0.445914	0.348231	0.346682	0.352597	0.538517	0.404471	0.365412	0.402401
-11.9071	0.296018	0.205154	0.155587	0.497541	0.435645	NaN	0.388384	0.356164	0.356162		0.358005	0.136638	0.260368	0.36135	0.377702	0.381186	0.405536	0.381322	0.364371	0.399752	0.393039	0.200838	0.339171	0.331368	0.366645	0.30485	0.257777	0.310643	0.318304	0.42473	0.465363	0.371082	0.354613	0.425771	0.334131	0.335984	0.251556	0.421976	0.489856	0.595301	0.523332	0.465894	0.416321	0.265116	0.353877	0.493849	0.365263	0.402592	0.390176
-11.8103	0.262954	0.193232	0.140176	0.400919	0.637037	NaN	0.405877	0.407853	0.373818		0.365804	0.137714	0.281892	0.341018	0.328541	0.280945	0.302515	0.323524	0.31923	0.35367	0.376842	0.264289	0.428482	0.348369	0.370513	0.207201	0.201201	0.279266	0.28244	0.419558	0.4022	0.413428	0.303037	0.421966	0.323769	0.336753	0.26131	0.544446	0.546729	0.597924	0.479553	0.457685	0.378828	0.279336	0.372158	0.418526	0.311267	0.372865	0.365614
-11.7135	0.272112	0.213424	0.180014	0.446602	0.570315	NaN	0.430058	0.351795	0.399219		0.358228	0.167865	0.346667	0.40763	0.38673	0.409535	0.396672	0.375908	0.48674	0.432801	0.442128	0.241274	0.254268	0.329789	0.339919	0.303747	0.167628	0.240075	0.30128	0.409796	0.404794	0.422367	0.350323	0.428896	0.420297	0.421683	0.269439	0.558379	0.589641	0.653674	0.594352	0.595557	0.385745	0.382402	0.312533	0.448677	0.318217	0.486087	0.342556
-11.6167	0.266932	0.192458	0.149448	0.516122	0.550819	NaN	0.445046	0.37733	0.393412		0.34956	0.180905	0.325626	0.380579	0.407826	0.386077	0.391258	0.421641	0.36272	0.355524	0.386286	0.278824	0.33734	0.347672	0.311608	0.203945	0.185753	0.277356	0.326938	0.404608	0.401826	0.388623	0.365709	0.40674	0.414421	0.391155	0.338775	0.523287	0.599585	0.625954	0.623557	0.610783	0.392737	0.365796	0.335834	0.526195	0.405353	0.522451	0.347735
-11.5198	0.276299	0.191951	0.168126	0.403784	0.423748	NaN	0.426628	0.35311	0.399566		0.369097	0.158387	0.275562	0.403738	0.370044	0.384099	0.380512	0.365587	0.403203	0.401377	0.407735	0.258476	0.346003	0.282786	0.297565	0.243174	0.206253	0.329095	0.31413	0.467751	0.407198	0.444591	0.340525	0.444976	0.38576	0.361554	0.27798	0.438651	0.529479	0.583784	0.545943	0.594153	0.378473	0.3169	0.29901	0.492788	0.346591	0.327548	0.336159
-11.423	0.257268	0.185789	0.151147	0.500609	0.584699	NaN	0.417249	0.370988	0.399245		0.363647	0.151558	0.271078	0.402582	0.4429	0.394357	0.374487	0.378496	0.405182	0.427543	0.414245	0.247081	0.267053	0.263715	0.295552	0.365757	0.159026	0.308985	0.311153	0.512164	0.392603	0.467753	0.357319	0.491549	0.431978	0.420267	0.311696	0.560943	0.456062	0.598219	0.532512	0.500223	0.383853	0.278877	0.339453	0.499865	0.380151	0.403674	0.367391
-11.3262	0.262849	0.211657	0.158786	0.385698	0.624473	NaN	0.424771	0.354506	0.39305		0.349036	0.163559	0.262982	0.466276	0.409745	0.387497	0.372124	0.406377	0.415502	0.413908	0.376816	0.236451	0.297936	0.332706	0.289898	0.251083	0.197343	0.275513	0.335393	0.507421	0.35476	0.444847	0.404978	0.473719	0.435764	0.429356	0.304885	0.470605	0.54089	0.633212	0.555388	0.59246	0.367273	0.295776	0.37897	0.484897	0.412904	0.39744	0.308625
-11.2294	0.233238	0.242069	0.167844	0.48964	0.661691	NaN	0.424685	0.383619	0.401247		0.334418	0.150035	0.287352	0.432122	0.457341	0.40027	0.4357	0.367545	0.421709	0.43358	0.42322	0.282003	0.32815	0.366738	0.319198	0.267091	0.216126	0.309303	0.344536	0.484481	0.397072	0.449373	0.434263	0.494861	0.457453	0.462334	0.247506	0.435869	0.436598	0.552511	0.497032	0.558243	0.376426	0.368765	0.371702	0.452677	0.366703	0.424291	0.360559
-11.1326	0.352644	0.30371	0.285726	0.430543	0.47969	NaN	0.415857	0.393119	0.389533		0.329658	0.12984	0.317232	0.375516	0.357696	0.349776	0.397012	0.356647	0.39963	0.383838	0.370508	0.267081	0.353892	0.348387	0.345189	0.279932	0.245368	0.293247	0.344165	0.451217	0.444686	0.48268	0.389749	0.532349	0.465949	0.477043	0.304877	0.511789	0.464145	0.530979	0.498712	0.544485	0.3956	0.369582	0.393236	0.540575	0.341073	0.42343	0.319923
-11.0358	0.312213	0.299302	0.252727	0.517708	0.412145	NaN	0.416427	0.385138	0.354117		0.329367	0.146058	0.299747	0.354553	0.404024	0.349964	0.339309	0.360143	0.386436	0.318958	0.339188	0.253565	0.380835	0.353191	0.303999	0.286289	0.197721	0.274459	0.341011	0.451127	0.429223	0.498516	0.343042	0.50968	0.468678	0.46629	0.270296	0.507673	0.444715	0.485571	0.468789	0.545297	0.381111	0.295813	0.409758	0.446998	0.412376	0.377047	0.375149
-10.939	0.349482	0.321743	0.269305	0.402994	0.60208	NaN	0.42462	0.369766	0.345433		0.310084	0.158944	0.28073	0.358293	0.352693	0.35501	0.353674	0.370541	0.415651	0.35415	0.390335	0.219564	0.358661	0.269684	0.303735	0.24604	0.180861	0.321927	0.338125	0.511828	0.417299	0.5011	0.359438	0.424502	0.484899	0.462993	0.288909	0.559059	0.485506	0.575869	0.550049	0.545863	0.380277	0.336696	0.360873	0.501502	0.339537	0.378006	0.368577
-10.8422	0.340723	0.323441	0.267699	0.505562	0.621617	NaN	0.423868	0.398162	0.373137		0.293902	0.136429	0.304906	0.380317	0.383688	0.317064	0.377793	0.332904	0.363711	0.389352	0.362956	0.231658	0.292877	0.354881	0.321611	0.210145	0.153186	0.30033	0.324634	0.497835	0.366242	0.504612	0.384505	0.414786	0.504711	0.482303	0.250485	0.529023	0.464576	0.581248	0.498489	0.509013	0.397344	0.295269	0.353736	0.466602	0.337233	0.354769	0.442692
-10.7454	0.310104	0.304147	0.236562	0.501637	0.609939	NaN	0.404176	0.352875	0.376476		0.284498	0.148209	0.311828	0.397701	0.418153	0.351828	0.352586	0.390723	0.410944	0.459841	0.396327	0.268764	0.303474	0.410204	0.289709	0.231037	0.205475	0.274522	0.305918	0.449091	0.406509	0.492038	0.366077	0.459122	0.502013	0.469942	0.245746	0.499663	0.522114	0.544953	0.486737	0.511906	0.367693	0.327327	0.306383	0.454513	0.356059	0.401761	0.416165
-10.6486	0.347769	0.331971	0.252971	0.479883	0.525904	NaN	0.386233	0.339067	0.328264		0.272565	0.173097	0.287663	0.447344	0.441215	0.406019	0.417444	0.424512	0.394608	0.43398	0.442079	0.267733	0.338494	0.331843	0.324926	0.244643	0.198849	0.28574	0.311984	0.466621	0.404099	0.491927	0.38853	0.432179	0.442473	0.409693	0.293573	0.492557	0.438228	0.548638	0.467863	0.471529	0.352686	0.319846	0.363541	0.487525	0.408154	0.46192	0.414556
-10.5518	0.274371	0.314727	0.238356	0.453663	0.592788	NaN	0.357428	0.306069	0.308461		0.262644	0.171505	0.248488	0.365362	0.417537	0.359743	0.380508	0.338709	0.334255	0.395845	0.381016	0.327603	0.301505	0.369879	0.34291	0.298452	0.196723	0.312391	0.336525	0.53869	0.388841	0.509938	0.421531	0.407765	0.429688	0.419008	0.265924	0.459778	0.466512	0.535912	0.522416	0.498605	0.354364	0.393816	0.344441	0.475948	0.356183	0.412703	0.391392
-10.455	0.308441	0.31471	0.264415	0.5172	0.611046	NaN	0.386015	0.339449	0.315734		0.264515	0.16887	0.230093	0.427148	0.424681	0.401389	0.447877	0.402406	0.410461	0.416924	0.439427	0.301392	0.349255	0.318881	0.349043	0.249564	0.171981	0.334835	0.316377	0.538693	0.375728	0.53256	0.417343	0.374118	0.441535	0.441603	0.248394	0.454973	0.438242	0.45327	0.533458	0.453437	0.333091	0.319148	0.354031	0.478757	0.385139	0.387299	0.372953
-10.3582	0.264932	0.328044	0.269142	0.433222	0.573051	NaN	0.446178	0.387936	0.370117		0.268795	0.164633	0.242221	0.396557	0.431236	0.376659	0.412807	0.383266	0.422566	0.386337	0.441612	0.299041	0.382838	0.2468	0.300753	0.243162	0.175201	0.294345	0.264623	0.425597	0.325505	0.483501	0.405029	0.350667	0.420058	0.415091	0.28662	0.506195	0.449068	0.515189	0.486197	0.515225	0.332251	0.361673	0.346386	0.428567	0.341827	0.413226	0.336961
-10.2614	0.263386	0.349521	0.273772	0.442078	0.481906	NaN	0.459821	0.400442	0.407207		0.316385	0.155423	0.291777	0.359918	0.367721	0.326579	0.351018	0.321742	0.363035	0.378675	0.389064	0.265168	0.335637	0.279071	0.298993	0.179915	0.154378	0.292577	0.254036	0.343474	0.332602	0.438415	0.445761	0.343901	0.381637	0.385561	0.326149	0.44427	0.487247	0.520928	0.493167	0.531262	0.339924	0.343959	0.335376	0.592922	0.325892	0.416691	0.401187
-10.1646	0.290473	0.35989	0.272109	0.494813	0.360661	NaN	0.437898	0.382943	0.399958		0.363359	0.148914	0.296428	0.384264	0.368629	0.36832	0.349043	0.355896	0.375456	0.368631	0.40009	0.290579	0.263568	0.383281	0.293623	0.299267	0.168591	0.335621	0.275998	0.359799	0.370045	0.398282	0.455222	0.389243	0.393733	0.396206	0.281115	0.514817	0.478247	0.532579	0.47529	0.542394	0.356807	0.315673	0.330543	0.50673	0.335526	0.339432	0.364106
-10.0678	0.264958	0.358312	0.287652	0.541105	0.398466	NaN	0.40474	0.334505	0.361208		0.319781	0.153836	0.293136	0.391774	0.426328	0.353675	0.34053	0.351204	0.392677	0.3385	0.465611	0.336821	0.297688	0.318848	0.300014	0.222831	0.199433	0.336543	0.296567	0.337762	0.354362	0.397593	0.411551	0.405837	0.407742	0.406586	0.269299	0.412736	0.418708	0.507886	0.463289	0.491032	0.331054	0.311617	0.299435	0.413838	0.279083	0.320071	0.32905
-9.97096	0.258649	0.346869	0.285755	0.549105	0.527806	NaN	0.402893	0.347311	0.370904		0.334131	0.158751	0.329206	0.473868	0.469106	0.441893	0.439599	0.423371	0.429373	0.430636	0.48525	0.338697	0.361004	0.315682	0.313608	0.256756	0.20396	0.326239	0.294304	0.349172	0.340162	0.438476	0.427825	0.407643	0.482199	0.484574	0.317889	0.509555	0.445055	0.505254	0.507283	0.447805	0.338621	0.329695	0.326863	0.448412	0.343701	0.371426	0.329558
-9.87415	0.280921	0.345203	0.26981	0.469813	0.585868	NaN	0.405868	0.332094	0.360922		0.352474	0.160932	0.350733	0.46148	0.447183	0.449833	0.432364	0.379961	0.461549	0.411459	0.448581	0.3186	0.280771	0.258481	0.304568	0.249867	0.20296	0.30766	0.256091	0.413588	0.3374	0.44172	0.411394	0.402334	0.482125	0.476122	0.298427	0.500534	0.48228	0.542871	0.522666	0.461428	0.295827	0.306806	0.308603	0.383119	0.325539	0.295274	0.386927
-9.77735	0.228425	0.33492	0.247581	0.562088	0.663259	NaN	0.421898	0.365997	0.356825		0.386257	0.163	0.331851	0.442098	0.417724	0.41834	0.419356	0.394998	0.422742	0.445276	0.467875	0.303543	0.309939	0.306597	0.282038	0.213655	0.173918	0.301165	0.236535	0.432855	0.386245	0.435194	0.367676	0.399848	0.427926	0.418925	0.307025	0.451231	0.473773	0.527197	0.51	0.527697	0.298486	0.352299	0.345726	0.421601	0.348184	0.335453	0.389389
-9.68054	0.231248	0.330057	0.226547	0.497351	0.663676	NaN	0.437586	0.381822	0.397964		0.375125	0.196308	0.310665	0.375301	0.376505	0.347328	0.341904	0.349332	0.343117	0.34821	0.37669	0.331353	0.336466	0.278264	0.307177	0.22807	0.199778	0.330404	0.253329	0.393276	0.487184	0.46049	0.408157	0.373741	0.452781	0.439337	0.248257	0.452407	0.44082	0.445018	0.465843	0.490057	0.324398	0.289121	0.301856	0.429898	0.305249	0.342777	0.303033
-9.58374	0.24779	0.339467	0.225534	0.42144	0.57149	NaN	0.41989	0.356385	0.341858		0.348034	0.204069	0.324921	0.385071	0.406385	0.37876	0.376296	0.387389	0.39917	0.383095	0.395584	0.344505	0.31869	0.273818	0.27965	0.217159	0.189427	0.286256	0.280885	0.361414	0.455345	0.426084	0.431113	0.333273	0.398607	0.399004	0.286104	0.486066	0.453256	0.512898	0.523867	0.422814	0.316699	0.359791	0.311293	0.517401	0.393843	0.383056	0.338301
-9.48693	0.261152	0.323282	0.235448	0.481449	0.596226	NaN	0.428612	0.333496	0.361311		0.375369	0.204557	0.296515	0.390735	0.416646	0.394706	0.35149	0.382484	0.420659	0.386934	0.367198	0.316326	0.285398	0.269039	0.23407	0.202252	0.193703	0.237897	0.293924	0.370212	0.381983	0.392722	0.414406	0.336198	0.3966	0.408833	0.287712	0.457544	0.423635	0.458215	0.419482	0.384804	0.323484	0.347609	0.298668	0.434026	0.323554	0.37036	0.325236
-9.39013	0.260689	0.364191	0.254756	0.540448	0.679945	1.03801	0.42941	0.360491	0.360773		0.373645	0.208091	0.314228	0.405514	0.422143	0.369328	0.341501	0.418895	0.364298	0.403803	0.41545	0.294078	0.318048	0.26913	0.261163	0.182752	0.17921	0.22577	0.29644	0.375535	0.3783	0.356956	0.373865	0.349501	0.405701	0.399583	0.310263	0.489542	0.453861	0.503013	0.515785	0.489961	0.353751	0.338058	0.260362	0.406918	0.339545	0.317663	0.294421
-9.29332	0.263886	0.341101	0.234965	0.366508	0.652482	1.15137	0.419179	0.337332	0.381333		0.352056	0.219981	0.346368	0.421524	0.416935	0.402836	0.380635	0.372481	0.367257	0.381579	0.415561	0.295182	0.314261	0.324343	0.277812	0.234567	0.186601	0.259298	0.325307	0.391329	0.40583	0.380294	0.382028	0.375814	0.418589	0.402277	0.258773	0.475034	0.485054	0.52999	0.473552	0.470219	0.329523	0.274759	0.233409	0.414695	0.353406	0.405557	0.326965
-9.19652	0.279915	0.34008	0.252014	0.300213	0.632786	1.03701	0.432186	0.367058	0.392158		0.359299	0.20936	0.338197	0.424653	0.439594	0.404437	0.413711	0.42513	0.375839	0.415855	0.424936	0.318244	0.324182	0.285962	0.269715	0.276838	0.204927	0.27537	0.302603	0.378661	0.378169	0.400763	0.405299	0.40293	0.393836	0.391859	0.325478	0.433986	0.479196	0.530286	0.433449	0.537159	0.308389	0.346293	0.299178	0.516875	0.368475	0.360208	0.260407
-9.09971	0.27797	0.35756	0.27006	0.414306	0.607795	1.11571	0.454295	0.380922	0.395182		0.355196	0.178552	0.27586	0.352097	0.409945	0.381822	0.31442	0.353439	0.364313	0.362619	0.378686	0.336793	0.333162	0.294104	0.282062	0.243971	0.224025	0.316544	0.299553	0.354988	0.379165	0.414141	0.439889	0.419362	0.375724	0.375718	0.285355	0.440965	0.448739	0.472239	0.532734	0.436857	0.306592	0.291761	0.257731	0.48417	0.296837	0.310325	0.316743
-9.0029	0.287648	0.362499	0.292883	0.364373	0.637607	1.07822	0.462638	0.394574	0.404742		0.364754	0.196623	0.258213	0.340602	0.394345	0.310576	0.362905	0.31706	0.425554	0.397175	0.334989	0.318343	0.319692	0.344467	0.280405	0.224605	0.21972	0.333989	0.297099	0.35013	0.354412	0.408823	0.413903	0.385537	0.361201	0.364078	0.281508	0.410583	0.405586	0.455816	0.429548	0.431973	0.307828	0.263928	0.281554	0.38441	0.263568	0.326293	0.294603
-8.9061	0.310649	0.371718	0.280844	0.305716	0.704055	1.26725	0.428648	0.360887	0.371066		0.389287	0.221915	0.27372	0.373996	0.360017	0.347029	0.373954	0.37431	0.402496	0.345458	0.384301	0.321019	0.278027	0.299275	0.275	0.289199	0.234426	0.313352	0.290018	0.365165	0.345517	0.403528	0.377328	0.372792	0.375455	0.372219	0.277042	0.379862	0.46969	0.438307	0.433606	0.439587	0.28964	0.315335	0.255742	0.402714	0.376648	0.300572	0.265259
-8.80929	0.304708	0.342961	0.270535	0.341402	0.658033	1.12814	0.419142	0.337774	0.369626		0.387497	0.229198	0.317967	0.460235	0.469208	0.403628	0.409534	0.404797	0.47314	0.435885	0.462778	0.291682	0.310941	0.254268	0.279203	0.22803	0.23618	0.26672	0.267563	0.316389	0.359371	0.410371	0.3877	0.358685	0.368771	0.349106	0.311856	0.408901	0.489273	0.449493	0.458996	0.437948	0.337562	0.333957	0.378381	0.423973	0.329699	0.381745	0.336698
-8.71249	0.311091	0.346963	0.276992	0.309373	0.697659	1.03118	0.439083	0.370166	0.38261		0.377956	0.250152	0.367887	0.404627	0.410567	0.409153	0.428297	0.405492	0.420069	0.425605	0.441887	0.317058	0.32391	0.309219	0.271571	0.292549	0.221798	0.30324	0.289308	0.34158	0.359182	0.40914	0.41884	0.406017	0.319718	0.306675	0.293711	0.390708	0.473881	0.49459	0.511898	0.456667	0.303737	0.273474	0.334209	0.403163	0.351819	0.322722	0.352311
-8.61568	0.289317	0.3267	0.276206	0.322525	0.703519	1.18598	0.459022	0.372814	0.388107		0.346183	0.264482	0.327008	0.430127	0.417836	0.369803	0.402091	0.370611	0.387988	0.38744	0.417675	0.312057	0.286485	0.304854	0.284128	0.262606	0.251814	0.338534	0.291016	0.34743	0.349589	0.399863	0.403754	0.439953	0.308646	0.308474	0.316198	0.4046	0.520804	0.496415	0.483361	0.465889	0.33238	0.33182	0.325705	0.470043	0.440717	0.359458	0.349918
-8.51888	0.313795	0.330301	0.272438	0.324673	0.613896	0.778667	0.439712	0.380936	0.372794		0.34281	0.231553	0.315425	0.350516	0.398576	0.37992	0.36831	0.383692	0.363269	0.352992	0.414185	0.347237	0.339083	0.295373	0.299737	0.308879	0.256596	0.374021	0.324796	0.392764	0.374541	0.440025	0.404952	0.468511	0.418019	0.408518	0.354269	0.421758	0.461428	0.51427	0.509062	0.462307	0.26951	0.300992	0.329283	0.406685	0.327747	0.338758	0.320865
-8.42207	0.307758	0.333255	0.271682	0.331579	0.62866	0.703902	0.410772	0.340389	0.358348		0.334098	0.198236	0.352871	0.41844	0.430747	0.420641	0.414847	0.392095	0.359153	0.384971	0.394631	0.351112	0.313458	0.327199	0.276804	0.262679	0.240903	0.360056	0.305	0.364083	0.341047	0.430338	0.398017	0.44192	0.435346	0.418541	0.313745	0.44906	0.478844	0.52861	0.504956	0.471639	0.323156	0.347399	0.348306	0.443415	0.309612	0.317279	0.345276
-8.32527	0.323182	0.32303	0.293489	0.326008	0.582767	0.706499	0.411895	0.345181	0.357696		0.302623	0.211833	0.406202	0.425507	0.445961	0.441367	0.40911	0.418863	0.415277	0.39766	0.429967	0.357792	0.279881	0.354289	0.297907	0.291186	0.250334	0.351813	0.316722	0.323216	0.34484	0.44466	0.418813	0.409101	0.410058	0.403625	0.292866	0.431556	0.523454	0.516748	0.547864	0.500979	0.32798	0.348891	0.339854	0.468867	0.416939	0.312276	0.372951
-8.22846	0.323083	0.334319	0.282087	0.284373	0.563098	0.655354	0.405014	0.350149	0.354973		0.298181	0.247487	0.450418	0.46965	0.498056	0.496019	0.433379	0.452083	0.448029	0.450983	0.526076	0.304628	0.323412	0.306985	0.281524	0.271195	0.247431	0.305702	0.300984	0.359144	0.342422	0.421621	0.432178	0.377309	0.340478	0.343645	0.307402	0.4084	0.457076	0.500231	0.489518	0.429076	0.32444	0.355947	0.342294	0.503135	0.388508	0.31239	0.431765
-8.13166	0.32841	0.352685	0.312281	0.281695	0.482889	0.639085	0.388917	0.329186	0.345513		0.321196	0.268381	0.423671	0.408486	0.435187	0.412418	0.481985	0.456322	0.424348	0.450077	0.408178	0.346068	0.259456	0.261777	0.285636	0.25643	0.236598	0.320418	0.297692	0.370497	0.381604	0.399899	0.460434	0.364442	0.344657	0.346529	0.294593	0.369389	0.419075	0.492594	0.489451	0.438216	0.316036	0.29169	0.354386	0.448899	0.374107	0.291809	0.36098
-8.03485	0.364214	0.37878	0.314709	0.304165	0.620398	0.664834	0.381699	0.326316	0.329371		0.33956	0.283353	0.331209	0.352356	0.386608	0.327368	0.360962	0.400026	0.385795	0.393092	0.365465	0.332917	0.28309	0.286938	0.26289	0.245946	0.219427	0.305125	0.278879	0.336889	0.335997	0.386886	0.449055	0.348505	0.304435	0.308023	0.317381	0.368555	0.462453	0.490755	0.470326	0.465641	0.341989	0.313773	0.308117	0.480748	0.389446	0.385935	0.357995
-7.93804	0.345587	0.363791	0.307057	0.346865	0.546954	0.657911	0.401612	0.337358	0.337465		0.352635	0.289914	0.341819	0.403241	0.479011	0.421159	0.452301	0.434464	0.447321	0.454407	0.452054	0.301927	0.30408	0.260749	0.249027	0.233706	0.221012	0.286861	0.267986	0.348895	0.291806	0.419862	0.422643	0.33627	0.311155	0.311067	0.296167	0.373945	0.448416	0.485936	0.430552	0.470596	0.34679	0.299565	0.334978	0.506516	0.367704	0.335006	0.376868
-7.84124	0.337971	0.364459	0.301986	0.337879	0.5653	0.596333	0.422045	0.369414	0.367747		0.354679	0.305971	0.38197	0.39355	0.482672	0.452306	0.412612	0.457489	0.46196	0.438722	0.442329	0.319211	0.378919	0.257827	0.257721	0.23337	0.21199	0.310241	0.276668	0.362108	0.291409	0.446582	0.429245	0.347182	0.383448	0.381456	0.312034	0.42724	0.473108	0.502318	0.462433	0.510894	0.360854	0.331521	0.3354	0.463965	0.364203	0.345582	0.357235
-7.74443	0.335614	0.351326	0.294949	0.320418	0.568211	0.646253	0.436068	0.373635	0.381281		0.352902	0.323651	0.358041	0.392695	0.473939	0.459783	0.475354	0.408662	0.43679	0.432277	0.475536	0.358781	0.348831	0.340918	0.296026	0.303578	0.253236	0.333306	0.314012	0.371347	0.36479	0.454601	0.469659	0.410496	0.410924	0.410062	0.30208	0.409286	0.480734	0.488418	0.56367	0.398683	0.356783	0.294997	0.313532	0.513997	0.412688	0.313419	0.371176
-7.64763	0.350642	0.39718	0.330432	0.294156	0.504089	0.584385	0.404926	0.347045	0.347		0.388477	0.327017	0.375534	0.457833	0.513173	0.486803	0.452871	0.438757	0.471383	0.427396	0.483353	0.320856	0.315541	0.198798	0.269001	0.225522	0.19725	0.267718	0.26026	0.376284	0.346934	0.406165	0.402196	0.384368	0.356606	0.350321	0.306733	0.348495	0.464381	0.490476	0.461946	0.457158	0.342294	0.32592	0.336062	0.518809	0.332321	0.364738	0.392176
-7.55082	0.319704	0.371429	0.327462	0.348828	0.579983	0.606854	0.378549	0.303539	0.324175		0.422649	0.348206	0.394341	0.420976	0.475177	0.411459	0.410191	0.414426	0.435809	0.376363	0.384517	0.301897	0.316041	0.286255	0.259834	0.221737	0.237527	0.270704	0.270586	0.39532	0.337486	0.412908	0.370586	0.385581	0.39782	0.39048	0.305095	0.412427	0.434158	0.447276	0.494446	0.450352	0.346876	0.366348	0.326009	0.463381	0.365914	0.32431	0.374156
-7.45402	0.327737	0.373319	0.331661	0.320732	0.553259	0.584776	0.405745	0.345517	0.358406		0.390581	0.379318	0.412037	0.423666	0.443313	0.451864	0.452281	0.411308	0.442793	0.381658	0.449065	0.326663	0.325005	0.292265	0.296962	0.301892	0.239181	0.299089	0.30695	0.430636	0.353367	0.454841	0.416982	0.416467	0.418435	0.404439	0.288917	0.448805	0.485402	0.528573	0.488506	0.48747	0.339017	0.359938	0.367377	0.482552	0.327174	0.28563	0.397961
-7.35721	0.329559	0.362693	0.29904	0.310574	0.5597	0.47557	0.437188	0.371446	0.382526		0.362744	0.401411	0.379836	0.39832	0.485283	0.448172	0.415639	0.426714	0.425284	0.413986	0.427694	0.318207	0.321996	0.312344	0.261843	0.227839	0.272327	0.301934	0.304648	0.380135	0.334385	0.453597	0.434389	0.396726	0.349256	0.332968	0.314471	0.447519	0.48504	0.505691	0.494811	0.524544	0.37585	0.346815	0.344489	0.426828	0.396305	0.401345	0.425248
-7.26041	0.313473	0.363531	0.292048	0.311965	0.496896	0.501424	0.459331	0.385819	0.40621		0.348918	0.429009	0.3673	0.420446	0.453542	0.489827	0.437471	0.45646	0.455149	0.441893	0.437253	0.349289	0.347281	0.261247	0.278926	0.266413	0.239258	0.298804	0.302726	0.322549	0.33971	0.412693	0.441253	0.374549	0.316013	0.300742	0.262752	0.43601	0.490421	0.566992	0.568767	0.433112	0.345503	0.341692	0.366278	0.427413	0.355041	0.390025	0.371485
-7.1636	0.326653	0.361102	0.284472	0.311236	0.520356	0.433722	0.478137	0.414291	0.42604		0.352982	0.417637	0.344808	0.403968	0.427072	0.407195	0.388064	0.413449	0.408377	0.356254	0.382226	0.317338	0.312554	0.260567	0.257563	0.274503	0.25153	0.291263	0.268741	0.321013	0.351741	0.364975	0.419542	0.34435	0.295206	0.270368	0.294552	0.350601	0.48878	0.474631	0.479076	0.452121	0.37618	0.329425	0.388826	0.41787	0.434679	0.288461	0.335291
-7.0668	0.306683	0.347078	0.259531	0.333915	0.524499	0.459623	0.465394	0.40855	0.402821		0.372704	0.424048	0.353147	0.405917	0.440379	0.397211	0.433631	0.388806	0.360978	0.375686	0.37014	0.312729	0.338857	0.259055	0.270879	0.247901	0.227569	0.28131	0.247753	0.325628	0.358448	0.368083	0.36624	0.351208	0.299519	0.276956	0.265302	0.422201	0.438928	0.488927	0.454861	0.473597	0.330462	0.309977	0.348345	0.43945	0.43803	0.328152	0.380571
-6.96999	0.31461	0.35618	0.277911	0.3127	0.512114	0.45013	0.435705	0.372289	0.38528		0.391217	0.438909	0.390548	0.445381	0.478643	0.428409	0.423538	0.467026	0.438555	0.397009	0.426979	0.353151	0.34586	0.278771	0.302403	0.229201	0.274457	0.294082	0.27615	0.366879	0.377545	0.384285	0.355927	0.388398	0.328791	0.31431	0.263767	0.427573	0.481028	0.56898	0.483785	0.460949	0.37785	0.312534	0.364657	0.382401	0.384713	0.332492	0.351345
-6.87318	0.326154	0.368627	0.280068	0.300023	0.484739	0.432814	0.439431	0.376601	0.386097		0.385251	0.465789	0.417533	0.414262	0.42777	0.398133	0.442239	0.406277	0.392461	0.437314	0.451804	0.367632	0.339298	0.296217	0.304888	0.282991	0.277651	0.301749	0.278816	0.370731	0.385288	0.367	0.371606	0.401251	0.345358	0.336305	0.276878	0.490892	0.50482	0.506082	0.480879	0.469821	0.38208	0.360219	0.357436	0.400073	0.37607	0.351869	0.390091
-6.77638	0.339158	0.394876	0.313628	0.306028	0.49223	0.438258	0.469093	0.380877	0.404334		0.396943	0.495433	0.499635	0.492485	0.535951	0.512589	0.533973	0.515756	0.478101	0.491074	0.520487	0.410064	0.414464	0.340736	0.371089	0.356259	0.361681	0.355809	0.295655	0.388096	0.410732	0.410922	0.386461	0.404428	0.42143	0.417363	0.308048	0.453788	0.482637	0.524518	0.559172	0.525459	0.435029	0.340766	0.38204	0.395118	0.52458	0.387573	0.458102
-6.67957	0.328327	0.377989	0.271801	0.295477	0.475055	0.423263	0.436201	0.372412	0.39927		0.39204	0.496106	0.4346	0.443471	0.478719	0.464863	0.479018	0.456639	0.48415	0.463607	0.490247	0.385729	0.436102	0.317319	0.35494	0.310434	0.29715	0.373589	0.291544	0.422498	0.40149	0.427819	0.376843	0.387701	0.440743	0.434471	0.332162	0.428009	0.464198	0.54898	0.513462	0.475847	0.380825	0.356622	0.399077	0.446466	0.430156	0.391558	0.428948
-6.58277	0.322961	0.362768	0.283192	0.27516	0.507341	0.450093	0.394221	0.354898	0.362928		0.358947	0.488644	0.338642	0.451205	0.491664	0.425071	0.464503	0.445154	0.493715	0.463406	0.424858	0.386556	0.349189	0.317187	0.343281	0.286795	0.318391	0.364332	0.275928	0.400206	0.374427	0.405404	0.382885	0.389674	0.37613	0.364535	0.286943	0.412895	0.443229	0.502857	0.48122	0.521469	0.419127	0.36995	0.406402	0.343037	0.418952	0.368733	0.443643
-6.48596	0.338514	0.389964	0.281202	0.297439	0.507515	0.418832	0.410268	0.351408	0.355751		0.361601	0.481047	0.37324	0.402714	0.413347	0.397526	0.401685	0.391422	0.418821	0.373939	0.372294	0.392251	0.37316	0.283959	0.357395	0.283264	0.326924	0.346758	0.305671	0.360673	0.361197	0.418585	0.396548	0.386237	0.373297	0.349697	0.298158	0.422358	0.471679	0.543027	0.511583	0.536513	0.447655	0.354166	0.416005	0.428994	0.431512	0.373679	0.465029
-6.38916	0.343952	0.390451	0.263027	0.26712	0.505295	0.395186	0.430196	0.399161	0.39427		0.356528	0.476836	0.446124	0.464855	0.507192	0.511459	0.492701	0.467961	0.480278	0.497664	0.473755	0.385543	0.418646	0.346706	0.374509	0.379452	0.350665	0.351468	0.33396	0.364166	0.381964	0.437448	0.385759	0.384902	0.375526	0.353688	0.295709	0.434335	0.412822	0.542841	0.533432	0.475561	0.445223	0.340792	0.383494	0.429816	0.406546	0.386632	0.480067
-6.29235	0.364998	0.399113	0.292368	0.301211	0.473216	0.365263	0.425455	0.368376	0.394971		0.335941	0.489659	0.44383	0.43745	0.487238	0.514068	0.511129	0.450067	0.483231	0.442006	0.512928	0.39948	0.418146	0.381796	0.354936	0.369626	0.361643	0.373314	0.327477	0.366238	0.396232	0.424279	0.390097	0.376544	0.395233	0.374727	0.315746	0.425668	0.437091	0.512869	0.506369	0.459788	0.449894	0.40287	0.436747	0.464505	0.488421	0.424028	0.486771
-6.19555	0.367921	0.407889	0.307537	0.247468	0.476714	0.384756	0.41998	0.360492	0.370999		0.356625	0.502036	0.458118	0.461107	0.537765	0.496837	0.445771	0.515256	0.465354	0.475349	0.493916	0.419396	0.396441	0.380649	0.371901	0.360263	0.379971	0.380786	0.320775	0.403885	0.378027	0.403201	0.410183	0.36849	0.403458	0.380206	0.327047	0.476445	0.458203	0.527857	0.539067	0.485364	0.454441	0.441605	0.385221	0.46924	0.508871	0.316544	0.467951
-6.09874	0.364856	0.418413	0.307092	0.272159	0.521243	0.402997	0.415531	0.354439	0.374271		0.383757	0.525986	0.458937	0.504839	0.52911	0.568929	0.518987	0.504286	0.4895	0.530973	0.525695	0.453875	0.516432	0.414702	0.37041	0.408616	0.398122	0.40366	0.353663	0.425795	0.346589	0.401857	0.419182	0.387453	0.392706	0.374459	0.368024	0.489148	0.460544	0.545074	0.560771	0.503232	0.475071	0.398408	0.454191	0.428202	0.505215	0.407123	0.437828
-6.00194	0.355616	0.414881	0.302418	0.266799	0.513376	0.383382	0.422989	0.36847	0.361158		0.378933	0.530031	0.377449	0.368913	0.422894	0.418241	0.435744	0.437061	0.376695	0.405699	0.377911	0.472446	0.456884	0.422294	0.368771	0.339632	0.401981	0.380207	0.356248	0.397584	0.302649	0.429255	0.417049	0.385987	0.400186	0.384352	0.360746	0.462803	0.495878	0.567047	0.568595	0.502241	0.464068	0.435771	0.390061	0.412362	0.492526	0.393693	0.472752
-5.90513	0.351476	0.400881	0.30183	0.252375	0.460457	0.390616	0.421921	0.380938	0.367598		0.359895	0.534027	0.388402	0.463701	0.479897	0.46268	0.473626	0.452861	0.40011	0.439178	0.46453	0.438454	0.477715	0.457251	0.36134	0.420302	0.449282	0.374664	0.335781	0.440439	0.328556	0.467031	0.451724	0.397214	0.429938	0.415915	0.347203	0.473396	0.432584	0.55206	0.514789	0.491288	0.398755	0.384363	0.446846	0.372542	0.431339	0.381375	0.423843
-5.80833	0.33974	0.387623	0.282905	0.273234	0.478331	0.369913	0.410414	0.367584	0.381399		0.364324	0.532044	0.467327	0.445791	0.484969	0.480609	0.507717	0.509754	0.495507	0.430385	0.489364	0.458776	0.509252	0.438572	0.403754	0.41179	0.450295	0.376747	0.335419	0.427976	0.373361	0.421263	0.435805	0.386232	0.409626	0.400266	0.350815	0.511683	0.452421	0.514262	0.50178	0.452659	0.483924	0.416584	0.472303	0.459108	0.449022	0.381209	0.429491
-5.71152	0.336741	0.425047	0.310168	0.235427	0.422916	0.366154	0.434273	0.377965	0.405517		0.363417	0.52163	0.463	0.498109	0.531675	0.521345	0.515486	0.473437	0.494634	0.498541	0.522269	0.452266	0.41701	0.433638	0.399098	0.370218	0.452076	0.375158	0.361695	0.400223	0.403822	0.391866	0.397055	0.378347	0.394465	0.389878	0.393403	0.514908	0.507312	0.52562	0.528377	0.523863	0.482242	0.378082	0.423707	0.423391	0.480821	0.414628	0.447664
-5.61471	0.335533	0.400812	0.294799	0.282183	0.393034	0.356494	0.433892	0.383676	0.390487		0.35832	0.522896	0.419285	0.456708	0.484813	0.435407	0.471158	0.474137	0.472317	0.479314	0.440166	0.427126	0.477247	0.449127	0.402248	0.431366	0.457549	0.367522	0.378165	0.417024	0.413117	0.434289	0.384816	0.384152	0.451335	0.442079	0.35503	0.496307	0.428371	0.532708	0.465887	0.517909	0.425056	0.380321	0.436108	0.388086	0.436709	0.424868	0.467119
-5.51791	0.327865	0.427992	0.307831	0.266207	0.409807	0.373604	0.404197	0.374052	0.359384		0.353852	0.538907	0.418741	0.441235	0.467081	0.4931	0.521638	0.452818	0.477576	0.468365	0.458787	0.444098	0.471935	0.401581	0.37966	0.425062	0.454657	0.355132	0.360977	0.421187	0.406793	0.440262	0.360538	0.373471	0.433341	0.428331	0.358787	0.468565	0.481295	0.54129	0.475026	0.496276	0.496598	0.358876	0.513316	0.377562	0.493459	0.449391	0.468296
-5.4211	0.35685	0.429051	0.328438	0.251586	0.414801	0.364661	0.401422	0.359232	0.380533		0.380478	0.556767	0.425981	0.463147	0.510002	0.479925	0.484909	0.475934	0.478375	0.480286	0.483203	0.442892	0.432191	0.472873	0.42087	0.438539	0.485291	0.386317	0.365387	0.433328	0.428973	0.46453	0.385885	0.391901	0.414661	0.423312	0.37908	0.504672	0.441309	0.493614	0.509838	0.484887	0.497853	0.432925	0.518411	0.382872	0.463019	0.422657	0.48417
-5.3243	0.339606	0.428112	0.324137	0.259104	0.425511	0.37755	0.442309	0.418211	0.406047		0.387334	0.594363	0.427347	0.433598	0.477126	0.468809	0.441719	0.446511	0.408592	0.469219	0.438518	0.432089	0.40535	0.445656	0.40051	0.36358	0.42609	0.378985	0.355945	0.400604	0.419752	0.423431	0.380889	0.391312	0.401466	0.407144	0.388408	0.495261	0.491844	0.509225	0.544666	0.604357	0.543617	0.404348	0.520083	0.389115	0.557166	0.386091	0.497693
-5.22749	0.347658	0.458705	0.334575	0.255285	0.418669	0.374342	0.431211	0.420951	0.391676		0.378971	0.577675	0.412983	0.462123	0.504043	0.444364	0.448229	0.454391	0.428699	0.386482	0.405612	0.47419	0.371027	0.409895	0.416759	0.44521	0.463098	0.360225	0.34227	0.3559	0.375897	0.40031	0.37689	0.40169	0.424284	0.428831	0.410163	0.483331	0.484327	0.539505	0.565824	0.507716	0.512611	0.432796	0.491115	0.425274	0.526745	0.451393	0.422585
-5.13069	0.351873	0.438301	0.329952	0.249037	0.41047	0.376797	0.426485	0.391136	0.400116		0.375132	0.571905	0.427783	0.436818	0.470589	0.494014	0.492523	0.444044	0.452154	0.419754	0.451109	0.475279	0.431808	0.409314	0.431273	0.40902	0.492708	0.373917	0.362712	0.365834	0.39171	0.417142	0.384345	0.397323	0.432728	0.427635	0.419022	0.467863	0.511309	0.523317	0.496211	0.486466	0.521413	0.413275	0.55814	0.399236	0.548585	0.486102	0.580761
-5.03388	0.355638	0.442275	0.333548	0.241126	0.4323	0.380132	0.439679	0.411304	0.407012		0.38916	0.588125	0.425247	0.504673	0.56626	0.540004	0.535671	0.51009	0.496929	0.531894	0.553527	0.493983	0.430082	0.448426	0.41308	0.415515	0.481083	0.411207	0.36673	0.407499	0.427129	0.392858	0.396463	0.39736	0.412375	0.399404	0.397089	0.522776	0.471891	0.574136	0.520955	0.503338	0.539169	0.416154	0.490921	0.387397	0.487606	0.462374	0.536552
-4.93708	0.376122	0.459374	0.349251	0.251303	0.400405	0.362774	0.408062	0.375881	0.381035		0.360923	0.599957	0.433017	0.478692	0.476081	0.518032	0.525625	0.515955	0.471521	0.512059	0.480402	0.492609	0.409302	0.416873	0.414	0.395951	0.512762	0.405984	0.340917	0.428131	0.386209	0.394377	0.417903	0.403774	0.407445	0.400913	0.391822	0.488833	0.475393	0.485595	0.51432	0.449205	0.502783	0.372234	0.511446	0.364333	0.563783	0.425159	0.463682
-4.84027	0.359481	0.447718	0.350944	0.241046	0.382852	0.333641	0.370414	0.317554	0.344151		0.353253	0.598766	0.52356	0.488676	0.554797	0.515173	0.51686	0.496845	0.485688	0.488701	0.498936	0.46268	0.437507	0.420365	0.408848	0.443649	0.504378	0.351779	0.337921	0.437597	0.373156	0.403361	0.393025	0.388036	0.385939	0.369659	0.391881	0.501773	0.512133	0.547083	0.507459	0.495789	0.560931	0.399508	0.551348	0.362122	0.467683	0.425943	0.515473
-4.74347	0.361436	0.466448	0.361647	0.257757	0.412793	0.369674	0.378044	0.357175	0.358613		0.365275	0.582982	0.577487	0.500423	0.515175	0.512813	0.543589	0.512995	0.437596	0.477226	0.506585	0.510001	0.459349	0.504391	0.435571	0.490224	0.544184	0.370555	0.376029	0.455252	0.408521	0.430644	0.398143	0.427674	0.411373	0.380539	0.405997	0.559251	0.599437	0.545656	0.532931	0.538081	0.543471	0.41709	0.495967	0.334327	0.494696	0.439693	0.515246
-4.64666	0.349223	0.44415	0.33073	0.255014	0.404886	0.353027	0.396351	0.370834	0.368304		0.384209	0.574465	0.513102	0.449845	0.495405	0.515709	0.503773	0.476185	0.475398	0.447746	0.471354	0.489124	0.469164	0.539991	0.429021	0.475115	0.513791	0.383818	0.379379	0.421957	0.405412	0.397648	0.396274	0.42172	0.393408	0.380924	0.406982	0.516191	0.498638	0.559339	0.557118	0.522694	0.553825	0.474049	0.584903	0.428048	0.482603	0.494108	0.516621
-4.54985	0.380875	0.44855	0.347644	0.244447	0.359173	0.324829	0.400061	0.34688	0.357713		0.399552	0.550052	0.412978	0.426837	0.484931	0.467276	0.476354	0.448025	0.462626	0.43729	0.427665	0.510052	0.4847	0.432699	0.39674	0.423863	0.510108	0.351584	0.374077	0.398001	0.398094	0.394849	0.408395	0.408722	0.380029	0.381539	0.434671	0.541065	0.581058	0.575177	0.589048	0.497095	0.543469	0.404514	0.574065	0.314301	0.542922	0.417807	0.513664
-4.45305	0.388164	0.460433	0.361844	0.257097	0.387483	0.34371	0.406279	0.362016	0.365596		0.407442	0.551197	0.416629	0.450061	0.52551	0.486597	0.48924	0.453561	0.478514	0.513063	0.475152	0.497876	0.453674	0.486737	0.41646	0.484702	0.511261	0.340359	0.367415	0.430772	0.410525	0.426158	0.408951	0.410405	0.396895	0.399623	0.394591	0.58232	0.568776	0.611761	0.620942	0.567487	0.49783	0.438262	0.525269	0.47306	0.52683	0.400898	0.496172
-4.35624	0.374674	0.45677	0.363545	0.236555	0.407128	0.366252	0.426797	0.391559	0.378398		0.402685	0.587856	0.469975	0.474249	0.533894	0.539121	0.505118	0.513609	0.473504	0.516792	0.516323	0.484445	0.486466	0.455018	0.385814	0.442798	0.512093	0.351505	0.354104	0.475937	0.434616	0.451637	0.394111	0.440153	0.404043	0.402947	0.418211	0.51597	0.509397	0.554441	0.523818	0.487662	0.48792	0.44795	0.494834	0.420483	0.479931	0.430592	0.506261
-4.25944	0.39088	0.459899	0.369777	0.284877	0.394973	0.348506	0.415006	0.368179	0.362827		0.379022	0.6024	0.513038	0.492517	0.513042	0.509477	0.540392	0.524816	0.490639	0.571261	0.496999	0.50205	0.484997	0.457929	0.399618	0.498641	0.526215	0.352045	0.355292	0.4665	0.428979	0.475445	0.415773	0.45911	0.399946	0.395101	0.465083	0.530926	0.506313	0.549002	0.540842	0.510745	0.512408	0.403965	0.455703	0.447328	0.486915	0.443785	0.534977
-4.16263	0.401984	0.46288	0.367166	0.265658	0.368197	0.33454	0.415345	0.361863	0.363891		0.35414	0.624995	0.485869	0.468442	0.523956	0.532228	0.494387	0.514772	0.462957	0.467119	0.481639	0.454678	0.446698	0.371613	0.372416	0.434052	0.503504	0.319218	0.331024	0.425097	0.362443	0.4138	0.410542	0.394851	0.382258	0.368102	0.429619	0.506295	0.517875	0.540742	0.542121	0.523553	0.552115	0.413004	0.45993	0.360738	0.460587	0.386682	0.498197
-4.06583	0.400986	0.497504	0.408271	0.276332	0.39757	0.349107	0.409739	0.382512	0.353307		0.376496	0.627969	0.485962	0.488943	0.533914	0.513704	0.502902	0.543372	0.513072	0.483857	0.493242	0.452608	0.499543	0.400981	0.374411	0.493797	0.481449	0.367133	0.355104	0.457004	0.409073	0.398354	0.437621	0.375673	0.40944	0.38956	0.437425	0.521461	0.542588	0.549552	0.48871	0.531615	0.479577	0.418976	0.466718	0.362861	0.469087	0.433588	0.474368
-3.96902	0.419347	0.51319	0.407017	0.259832	0.392698	0.365742	0.407552	0.379594	0.37257		0.37334	0.620971	0.472641	0.576265	0.605076	0.649046	0.604073	0.604598	0.532391	0.537891	0.555262	0.469918	0.443742	0.45626	0.369766	0.467832	0.499041	0.39423	0.37137	0.44355	0.464515	0.413559	0.444428	0.386694	0.415037	0.399751	0.452071	0.498191	0.470529	0.514995	0.497211	0.558944	0.527978	0.468738	0.536743	0.431337	0.517285	0.458177	0.507186
-3.87222	0.403463	0.515092	0.404426	0.290931	0.405541	0.367854	0.432031	0.423426	0.410552		0.335261	0.623003	0.484118	0.573715	0.575985	0.564978	0.583402	0.609091	0.561477	0.569057	0.528514	0.458038	0.459533	0.454092	0.374642	0.43004	0.515625	0.391714	0.383985	0.408576	0.463057	0.385289	0.428544	0.407899	0.387674	0.384766	0.424681	0.522503	0.503457	0.548011	0.544092	0.507649	0.596589	0.431104	0.496405	0.445468	0.468789	0.377239	0.523818
-3.77541	0.402533	0.51475	0.423878	0.277436	0.389976	0.370838	0.44212	0.423531	0.421853		0.335751	0.590123	0.462897	0.467065	0.516917	0.516319	0.501676	0.486109	0.478582	0.487748	0.46578	0.495872	0.478525	0.517497	0.387312	0.425956	0.529476	0.435964	0.410039	0.432391	0.500572	0.412763	0.43781	0.452482	0.408908	0.412344	0.462761	0.525418	0.552847	0.526157	0.583339	0.588185	0.560072	0.448641	0.468109	0.376299	0.498981	0.486188	0.517663
-3.67861	0.445087	0.533292	0.454139	0.299185	0.417152	0.395861	0.419144	0.415388	0.41391		0.372944	0.593025	0.507311	0.510812	0.5389	0.521615	0.550169	0.511881	0.497293	0.506957	0.508163	0.460515	0.499909	0.450723	0.350321	0.434359	0.46695	0.404465	0.362482	0.431546	0.446849	0.384346	0.361529	0.387683	0.396561	0.393949	0.463045	0.471142	0.482886	0.533845	0.523984	0.535485	0.545803	0.431563	0.513672	0.40213	0.502799	0.398253	0.491915
-3.5818	0.428981	0.529932	0.464891	0.297971	0.400694	0.380806	0.412436	0.382683	0.389594		0.396727	0.625465	0.551595	0.564324	0.614968	0.557115	0.591528	0.555129	0.559067	0.578781	0.529215	0.448893	0.458366	0.396319	0.332459	0.46851	0.467797	0.384507	0.359129	0.460832	0.411717	0.368011	0.320766	0.379286	0.420194	0.420723	0.433784	0.482794	0.461156	0.575886	0.523797	0.570442	0.504735	0.420219	0.50624	0.414271	0.505249	0.432402	0.502718
-3.485	0.450147	0.520008	0.46556	0.306951	0.416938	0.411232	0.416609	0.426324	0.418581		0.399669	0.620806	0.494832	0.52014	0.607892	0.550956	0.581446	0.59731	0.545788	0.541014	0.540274	0.455597	0.437716	0.525938	0.375219	0.392611	0.481701	0.376829	0.399996	0.504732	0.426155	0.40263	0.326027	0.419039	0.426061	0.434902	0.455251	0.503128	0.463221	0.529118	0.559045	0.457796	0.560898	0.41938	0.505437	0.415671	0.505872	0.395676	0.554179
-3.38819	0.446524	0.507353	0.481599	0.284951	0.433447	0.420845	0.431614	0.444453	0.42752		0.411112	0.597472	0.474107	0.503767	0.556012	0.553106	0.586893	0.530461	0.515266	0.501917	0.521051	0.427219	0.47188	0.481145	0.358935	0.415248	0.505904	0.357376	0.373387	0.437782	0.437351	0.384768	0.314056	0.396116	0.39112	0.401528	0.458461	0.444702	0.470782	0.481341	0.535731	0.487144	0.559709	0.435625	0.519115	0.398931	0.505099	0.412735	0.483492
-3.29138	0.442365	0.510247	0.463693	0.282866	0.43266	0.431657	0.441349	0.454371	0.455459		0.402856	0.583661	0.487788	0.488275	0.54127	0.540044	0.504474	0.497263	0.468188	0.484402	0.543467	0.460654	0.470121	0.480358	0.396207	0.488902	0.493598	0.411267	0.381303	0.435637	0.46015	0.38634	0.3597	0.404062	0.409128	0.41194	0.484762	0.485996	0.510835	0.562197	0.530419	0.489061	0.585701	0.499425	0.531763	0.406789	0.49888	0.471673	0.522482
-3.19458	0.452178	0.521398	0.493501	0.271978	0.423613	0.423691	0.434967	0.461453	0.452426		0.379097	0.568418	0.469998	0.439068	0.457853	0.502231	0.501708	0.48149	0.448518	0.456213	0.469647	0.498558	0.54191	0.531882	0.427164	0.511225	0.506061	0.444306	0.41146	0.513563	0.470667	0.390669	0.391318	0.455641	0.473326	0.468154	0.461852	0.478432	0.494014	0.482149	0.486545	0.522432	0.579176	0.411863	0.538055	0.414111	0.573621	0.452362	0.577037
-3.09777	0.431102	0.523091	0.494446	0.281521	0.433686	0.430405	0.406364	0.410965	0.421594		0.392563	0.552786	0.471313	0.444143	0.506025	0.494574	0.516748	0.509478	0.477313	0.463832	0.507456	0.444881	0.449927	0.503145	0.402755	0.43531	0.50533	0.405811	0.366781	0.485986	0.413889	0.350847	0.35268	0.416872	0.475822	0.464468	0.539598	0.533647	0.535603	0.558284	0.582213	0.524148	0.576176	0.506214	0.679327	0.454564	0.521722	0.462877	0.579784
-3.00097	0.442738	0.52149	0.495075	0.297605	0.422136	0.449891	0.3849	0.391508	0.385219		0.382662	0.545445	0.435459	0.481526	0.51784	0.538632	0.517829	0.521955	0.507971	0.475091	0.467639	0.46789	0.482067	0.452344	0.422479	0.480503	0.51599	0.422164	0.39293	0.480534	0.404201	0.376521	0.393931	0.399168	0.464677	0.448618	0.530775	0.517284	0.507421	0.605156	0.560694	0.544024	0.583739	0.526272	0.636013	0.472147	0.594417	0.518375	0.566218
-2.90416	0.44325	0.524531	0.509644	0.258694	0.424685	0.438648	0.366694	0.397691	0.388999		0.337624	0.550303	0.463743	0.588233	0.596938	0.571365	0.597998	0.596952	0.599899	0.598402	0.603866	0.453443	0.459692	0.506925	0.427251	0.463974	0.455854	0.404136	0.409791	0.458378	0.362717	0.360972	0.382769	0.401719	0.4102	0.407725	0.56111	0.573682	0.586661	0.609836	0.603523	0.556534	0.585686	0.492788	0.620715	0.484607	0.588119	0.457594	0.552317
-2.80736	0.440134	0.516473	0.521519	0.288671	0.44496	0.44559	0.388123	0.405744	0.436801		0.362042	0.530036	0.431507	0.47437	0.527883	0.560019	0.521625	0.507331	0.483858	0.52222	0.494668	0.426674	0.45004	0.4652	0.401836	0.496987	0.472926	0.37552	0.387511	0.437462	0.368959	0.353456	0.368157	0.388046	0.392272	0.390581	0.568424	0.552428	0.57343	0.617487	0.61488	0.545201	0.557371	0.518137	0.551506	0.491069	0.5819	0.452767	0.585036
-2.71055	0.437823	0.533623	0.531621	0.2923	0.43346	0.465069	0.410044	0.445666	0.424589		0.393786	0.539806	0.405787	0.456396	0.520827	0.534867	0.494999	0.493664	0.490646	0.485417	0.532168	0.445478	0.489456	0.482969	0.398113	0.473581	0.449337	0.366046	0.363865	0.453529	0.407411	0.363473	0.39063	0.372885	0.35354	0.348116	0.572169	0.517528	0.559336	0.603825	0.617308	0.503679	0.577088	0.469098	0.539284	0.400017	0.575627	0.431016	0.600043
-2.61375	0.431465	0.528424	0.524332	0.279411	0.445446	0.444006	0.415617	0.437009	0.430885		0.36129	0.559486	0.475902	0.569111	0.622319	0.595386	0.557879	0.579262	0.589578	0.558178	0.573207	0.467965	0.455602	0.489211	0.434341	0.495572	0.457714	0.396321	0.367684	0.473756	0.429717	0.379835	0.423359	0.373885	0.368201	0.365577	0.585418	0.50895	0.543124	0.599755	0.494126	0.517412	0.598977	0.541307	0.568099	0.440163	0.582438	0.443925	0.531357
-2.51694	0.438781	0.518882	0.546106	0.300187	0.452529	0.449057	0.413047	0.449171	0.39048		0.331736	0.566769	0.500662	0.54496	0.574575	0.589183	0.55856	0.535277	0.590664	0.547932	0.573897	0.51368	0.536144	0.524885	0.44541	0.500985	0.48478	0.438963	0.355605	0.473613	0.45749	0.414502	0.424765	0.380443	0.444086	0.440399	0.587315	0.576287	0.6124	0.593904	0.575976	0.552665	0.576789	0.497132	0.583709	0.470057	0.569751	0.492534	0.617304
-2.42014	0.427054	0.501494	0.495865	0.29165	0.449251	0.463755	0.403754	0.414459	0.404979		0.352438	0.562985	0.5032	0.552126	0.576024	0.623254	0.579585	0.55246	0.611748	0.529524	0.551437	0.460692	0.441719	0.44505	0.439597	0.472712	0.474211	0.426789	0.312111	0.452818	0.469368	0.408978	0.374327	0.408364	0.440148	0.43345	0.620196	0.576066	0.602972	0.621147	0.566882	0.519201	0.552607	0.505235	0.60839	0.41702	0.542473	0.468406	0.581233
-2.32333	0.447012	0.52083	0.534183	0.281296	0.452527	0.45379	0.389665	0.422736	0.402944		0.368328	0.570154	0.50843	0.543494	0.536479	0.531641	0.555555	0.562493	0.524819	0.516472	0.512895	0.496952	0.501952	0.465778	0.456253	0.447868	0.524199	0.446643	0.372341	0.451491	0.465169	0.427663	0.388772	0.444381	0.42748	0.414046	0.606154	0.547544	0.50738	0.56434	0.608682	0.570274	0.572043	0.515098	0.577352	0.373828	0.572355	0.479723	0.572524
-2.22652	0.438566	0.527193	0.558317	0.282138	0.462978	0.467776	0.379115	0.389258	0.37079		0.363498	0.568123	0.462416	0.472691	0.545113	0.509029	0.525061	0.503467	0.46668	0.498355	0.42571	0.495417	0.487357	0.509729	0.437659	0.47591	0.522639	0.432699	0.378134	0.422652	0.42753	0.443738	0.373754	0.415923	0.395511	0.380459	0.60363	0.528518	0.517912	0.606506	0.602558	0.531439	0.581769	0.504766	0.521965	0.420903	0.518208	0.468182	0.603527
-2.12972	0.447373	0.523178	0.575962	0.270961	0.456684	0.440496	0.422603	0.459924	0.443914		0.359166	0.542519	0.401542	0.470462	0.45513	0.488161	0.430034	0.449478	0.453776	0.483986	0.484381	0.486828	0.444468	0.478025	0.401846	0.388049	0.478669	0.42482	0.376084	0.415282	0.407128	0.437753	0.382358	0.413504	0.392722	0.385119	0.567196	0.565973	0.513154	0.554292	0.516833	0.544087	0.566115	0.505804	0.539734	0.440506	0.513456	0.452409	0.576386
-2.03291	0.442683	0.497354	0.53126	0.281373	0.440239	0.439678	0.451362	0.487636	0.470678		0.355273	0.559989	0.450449	0.457959	0.48187	0.49618	0.526213	0.493912	0.455955	0.459867	0.416686	0.474236	0.482256	0.490631	0.409981	0.436329	0.490007	0.415534	0.38702	0.44733	0.39651	0.417064	0.396166	0.422414	0.417956	0.420322	0.565129	0.537323	0.534091	0.55791	0.580621	0.529232	0.551445	0.559575	0.530145	0.376387	0.553485	0.464506	0.528158
-1.93611	0.46025	0.524331	0.561499	0.279899	0.425576	0.420743	0.426045	0.456371	0.452835		0.350211	0.58933	0.488592	0.473166	0.532726	0.535481	0.535281	0.503487	0.505982	0.521347	0.477705	0.504538	0.472865	0.485689	0.428895	0.48898	0.476569	0.412223	0.393559	0.499618	0.409697	0.432265	0.384361	0.43553	0.464311	0.460919	0.567474	0.533426	0.53282	0.508534	0.57464	0.501801	0.522785	0.533423	0.517374	0.376925	0.568063	0.442919	0.517704
-1.8393	0.483165	0.537321	0.55413	0.272237	0.448689	0.441262	0.402017	0.444062	0.42176		0.323022	0.572642	0.450751	0.521285	0.554121	0.549183	0.503797	0.509462	0.489368	0.444969	0.47644	0.457329	0.400414	0.522254	0.412567	0.483799	0.473095	0.429817	0.384622	0.501307	0.427382	0.428863	0.360434	0.433298	0.426115	0.41374	0.578914	0.580879	0.524904	0.503864	0.503823	0.549082	0.532369	0.483776	0.57581	0.38979	0.569189	0.467363	0.507633
-1.7425	0.479439	0.526863	0.57618	0.277655	0.453942	0.44967	0.397573	0.414828	0.429854		0.337547	0.55246	0.436597	0.48745	0.506164	0.588967	0.519406	0.512725	0.535809	0.497677	0.420973	0.465103	0.437802	0.481068	0.395238	0.431378	0.45497	0.447645	0.394785	0.507094	0.444793	0.428776	0.398618	0.471889	0.383311	0.372399	0.598337	0.517569	0.512092	0.536643	0.527264	0.538257	0.516731	0.45064	0.520702	0.359094	0.523827	0.418676	0.532845
-1.64569	0.508107	0.540965	0.60605	0.27641	0.454014	0.441233	0.407475	0.441444	0.408114		0.378089	0.555949	0.434047	0.55546	0.579545	0.599391	0.603848	0.610844	0.597631	0.560492	0.549294	0.440314	0.384589	0.451053	0.403225	0.364758	0.417073	0.427679	0.34569	0.443381	0.439209	0.415098	0.393382	0.426688	0.420257	0.409607	0.581448	0.568202	0.531498	0.53062	0.587491	0.581558	0.522459	0.456344	0.576177	0.450152	0.51334	0.44503	0.56303
-1.54889	0.483034	0.538563	0.615292	0.279226	0.442123	0.437111	0.395796	0.432574	0.419834		0.380402	0.539709	0.412435	0.49977	0.52013	0.569084	0.4851	0.541709	0.506785	0.518733	0.483675	0.433949	0.408092	0.485574	0.42552	0.394836	0.442323	0.469799	0.369863	0.446039	0.49981	0.450443	0.389921	0.383809	0.475629	0.475392	0.586078	0.532215	0.513763	0.553805	0.5307	0.570102	0.545407	0.490866	0.567563	0.380432	0.494415	0.386188	0.547054
-1.45208	0.506755	0.560615	0.632017	0.290191	0.436388	0.433511	0.390815	0.452184	0.439328		0.371072	0.503784	0.402556	0.47837	0.504798	0.559232	0.531022	0.556476	0.496764	0.49499	0.47292	0.412841	0.368372	0.465049	0.412752	0.430379	0.404613	0.435623	0.381019	0.457686	0.466624	0.427569	0.387321	0.361479	0.443839	0.439296	0.622927	0.528318	0.538144	0.57281	0.514205	0.547081	0.529746	0.498159	0.57053	0.348217	0.612759	0.404283	0.527412
-1.35528	0.51196	0.544776	0.640388	0.28811	0.453707	0.438504	0.406871	0.442468	0.446548		0.344783	0.483053	0.472207	0.503938	0.528397	0.567839	0.561273	0.540019	0.556919	0.511384	0.51303	0.43591	0.398665	0.481049	0.420339	0.413938	0.461567	0.449086	0.39746	0.446173	0.432849	0.44513	0.399664	0.390571	0.452199	0.437059	0.643292	0.515398	0.507417	0.572735	0.591772	0.584126	0.554606	0.577977	0.571136	0.420075	0.54743	0.486034	0.605794
-1.25847	0.511083	0.54922	0.678184	0.301627	0.45065	0.450004	0.421618	0.44443	0.436078		0.359596	0.472157	0.525033	0.59697	0.631518	0.628787	0.608924	0.603496	0.652396	0.630345	0.572292	0.428302	0.366164	0.483122	0.427818	0.412528	0.44564	0.441076	0.386511	0.410838	0.408148	0.436303	0.375603	0.420038	0.422345	0.42094	0.661864	0.542674	0.568467	0.55975	0.589073	0.542768	0.576567	0.521489	0.570677	0.443328	0.616689	0.439315	0.531828
-1.16167	0.571981	0.603133	0.695683	0.308547	0.482838	0.460288	0.418538	0.455405	0.436177		0.362186	0.462526	0.511273	0.577345	0.60772	0.629218	0.621424	0.571476	0.635832	0.616937	0.551614	0.404243	0.366558	0.451708	0.41561	0.370861	0.439838	0.398135	0.361848	0.368687	0.398247	0.43104	0.379314	0.446143	0.396986	0.387713	0.640098	0.462285	0.479386	0.534691	0.526651	0.511432	0.532273	0.537924	0.539437	0.37572	0.544205	0.447582	0.533947
-1.06486	0.571386	0.578001	0.704542	0.320417	0.443409	0.433821	0.419056	0.435952	0.430559		0.365208	0.457018	0.443909	0.521801	0.553012	0.536821	0.598773	0.532974	0.547278	0.545179	0.512566	0.395516	0.424748	0.381823	0.421656	0.352355	0.370599	0.380659	0.349723	0.380147	0.395135	0.434111	0.375521	0.449534	0.393069	0.370487	0.647412	0.515241	0.533722	0.598249	0.572301	0.524215	0.580621	0.516793	0.519633	0.376319	0.531357	0.465251	0.545799
-0.968054	0.576368	0.603482	0.712083	0.323897	0.432223	0.40935	0.411535	0.443319	0.414812		0.393457	0.471415	0.420538	0.500453	0.508226	0.513008	0.51179	0.520631	0.524981	0.510017	0.48318	0.370938	0.398241	0.434413	0.432267	0.389078	0.403436	0.404072	0.356725	0.37198	0.440561	0.411912	0.346992	0.427114	0.386131	0.373267	0.664099	0.517367	0.540676	0.561323	0.548233	0.540804	0.568738	0.520747	0.541802	0.413939	0.528416	0.486454	0.537814
-0.871249	0.603684	0.604526	0.727335	0.337558	0.474182	0.460021	0.406704	0.423192	0.395115		0.410672	0.44701	0.470478	0.533301	0.530676	0.531875	0.472848	0.522534	0.51923	0.542179	0.489199	0.400438	0.354453	0.432999	0.429412	0.38072	0.401019	0.438062	0.395838	0.40806	0.46778	0.411326	0.349142	0.438737	0.37284	0.366186	0.662736	0.488931	0.527718	0.539727	0.571074	0.566815	0.539423	0.477834	0.618412	0.396549	0.539909	0.479232	0.487827
-0.774443	0.607662	0.625906	0.719778	0.35653	0.490825	0.482881	0.413789	0.430803	0.41754		0.414095	0.391105	0.445186	0.544401	0.517229	0.535347	0.563485	0.529844	0.566004	0.569199	0.515835	0.400952	0.439419	0.416223	0.445695	0.436371	0.416282	0.46572	0.441551	0.503932	0.494646	0.465534	0.429945	0.454481	0.416269	0.408352	0.66211	0.483375	0.515188	0.510641	0.5119	0.487292	0.52127	0.512156	0.504654	0.3567	0.527881	0.480996	0.563576
-0.677638	0.601265	0.635408	0.753767	0.364437	0.470515	0.46073	0.377736	0.399949	0.403821		0.392731	0.380641	0.398606	0.462532	0.43875	0.483573	0.471088	0.43362	0.502075	0.480445	0.469931	0.427753	0.414784	0.512544	0.465196	0.39856	0.448701	0.453477	0.427327	0.517851	0.451722	0.502239	0.434559	0.453003	0.438095	0.425408	0.679944	0.517203	0.485081	0.548883	0.546534	0.554778	0.56639	0.503784	0.625266	0.412664	0.561598	0.469386	0.496213
-0.580833	0.611023	0.631263	0.740164	0.325527	0.439066	0.445605	0.371659	0.407027	0.378987		0.384543	0.377788	0.390666	0.501891	0.531878	0.497592	0.495758	0.518036	0.535091	0.498788	0.478075	0.39357	0.448571	0.517082	0.461699	0.416082	0.411993	0.430531	0.40679	0.481709	0.458039	0.507271	0.402404	0.463605	0.434612	0.417382	0.762196	0.504299	0.520983	0.581593	0.573864	0.530026	0.588365	0.480742	0.600932	0.459982	0.56146	0.4676	0.492731
-0.484027	0.649506	0.660987	0.824801	0.34319	0.462433	0.443524	0.378293	0.382816	0.400446		0.38807	0.366984	0.392369	0.497078	0.458309	0.455486	0.451261	0.455913	0.462703	0.449243	0.448907	0.39707	0.425333	0.481944	0.450807	0.427408	0.402506	0.424424	0.388502	0.506839	0.492362	0.524712	0.441413	0.48566	0.419133	0.402674	0.741144	0.532492	0.510867	0.542318	0.565155	0.583065	0.580343	0.534614	0.605486	0.438104	0.537755	0.493473	0.510991
-0.387222	0.660004	0.659819	0.789042	0.388372	0.489604	0.472152	0.395322	0.382555	0.418994		0.347438	0.373449	0.370124	0.49304	0.500784	0.492642	0.430611	0.449749	0.488596	0.480971	0.471738	0.392362	0.406388	0.467231	0.443316	0.324335	0.382322	0.410735	0.368195	0.476327	0.446356	0.518184	0.450024	0.455242	0.386087	0.37239	0.705878	0.516745	0.442615	0.48413	0.542155	0.514431	0.546137	0.470291	0.614392	0.378841	0.606109	0.481619	0.504112
-0.290416	0.642938	0.630237	0.714588	0.382374	0.464193	0.454723	0.400497	0.384604	0.440797		0.368799	0.376958	0.35485	0.490074	0.461676	0.503295	0.46237	0.528748	0.470684	0.477532	0.476783	0.409441	0.384132	0.460126	0.448911	0.35503	0.414934	0.423253	0.405566	0.478271	0.464593	0.504119	0.434394	0.457925	0.425423	0.409414	0.707606	0.483993	0.472519	0.481761	0.506575	0.50751	0.555969	0.495501	0.567897	0.392184	0.521046	0.461845	0.551283
-0.193611	0.6432	0.621263	0.774795	0.357105	0.49075	0.488983	0.427068	0.407424	0.43146		0.376297	0.351321	0.375593	0.514503	0.518933	0.511805	0.518182	0.499462	0.492893	0.492322	0.518955	0.391576	0.393801	0.401725	0.408972	0.36049	0.364081	0.429878	0.421317	0.436661	0.473391	0.50374	0.422457	0.427015	0.425761	0.420888	0.668185	0.51849	0.524901	0.509166	0.526299	0.527669	0.570888	0.437574	0.619424	0.390559	0.453805	0.480897	0.552162
-0.0968054	0.619795	0.610022	0.708109	0.369724	0.486629	0.45593	0.424365	0.40718	0.485479		0.33974	0.343212	0.401521	0.510909	0.492534	0.463668	0.465	0.475236	0.45357	0.501262	0.445987	0.4095	0.397213	0.462805	0.440717	0.343757	0.375357	0.445289	0.422394	0.418526	0.437684	0.526335	0.436539	0.399971	0.407849	0.409751	0.628008	0.458371	0.513602	0.496072	0.468474	0.484007	0.506322	0.45999	0.504662	0.4627	0.424019	0.419999	0.420973
0	0.611339	0.597303	0.679323	0.376198	0.475969	0.468982	0.382089	0.369098	0.429962		0.353782	0.329037	0.381113	0.50426	0.463803	0.429265	0.428377	0.430332	0.446956	0.463623	0.412003	0.40733	0.402948	0.439946	0.418055	0.380377	0.378472	0.463074	0.445171	0.454887	0.418103	0.497566	0.413995	0.408963	0.395323	0.388678	0.593795	0.46698	0.495915	0.440655	0.471044	0.435375	0.446391	0.442914	0.471429	0.477807	0.479449	0.47661	0.431735
0.0968054	0.621779	0.600278	0.686337	0.370038	0.470644	0.458978	0.404651	0.388262	0.433196		0.363075	0.306636	0.388086	0.524191	0.461842	0.526125	0.467446	0.498102	0.464114	0.502525	0.489362	0.422677	0.409988	0.409658	0.408965	0.404271	0.346784	0.447873	0.440479	0.478702	0.424921	0.475516	0.406584	0.40449	0.381548	0.375112	0.611776	0.422764	0.514397	0.501782	0.515807	0.45176	0.440358	0.466167	0.421393	0.575336	0.440396	0.456608	0.488448
0.193611	0.577312	0.58311	0.620759	0.388903	0.494412	0.46901	0.419954	0.399224	0.456685		0.3635	0.303126	0.415221	0.530386	0.494134	0.568516	0.510706	0.507647	0.550105	0.576147	0.49858	0.389149	0.392347	0.395743	0.391019	0.35184	0.337604	0.443519	0.437901	0.415449	0.407365	0.485675	0.459098	0.423098	0.342723	0.341038	0.67251	0.438819	0.557204	0.535022	0.551611	0.470623	0.502349	0.476638	0.513448	0.644839	0.464698	0.476233	0.52316
0.290416	0.556066	0.581255	0.603254	0.35708	0.488154	0.460416	0.403105	0.349251	0.439245		0.326619	0.292021	0.393622	0.573336	0.468116	0.50612	0.521775	0.537678	0.544731	0.529158	0.461054	0.414651	0.416604	0.426981	0.372721	0.328334	0.34959	0.434085	0.427642	0.370695	0.387051	0.483022	0.464804	0.44175	0.347204	0.344174	0.601766	0.37685	0.518715	0.469938	0.535811	0.498562	0.527964	0.444561	0.455982	0.519602	0.44819	0.449065	0.49962
0.387222	0.532194	0.544364	0.568332	0.356965	0.503479	0.464732	0.399962	0.378671	0.440678		0.315436	0.303629	0.418327	0.484243	0.462103	0.499404	0.447442	0.467208	0.524321	0.472813	0.472334	0.377056	0.397928	0.426592	0.365668	0.330038	0.323268	0.408737	0.400846	0.366321	0.398508	0.454158	0.462795	0.429974	0.37075	0.35927	0.525419	0.331736	0.541065	0.509959	0.535156	0.462817	0.446857	0.466211	0.395177	0.657519	0.3791	0.403932	0.483603
0.484027	0.523547	0.55568	0.613858	0.344149	0.497006	0.454096	0.396655	0.383517	0.42511		0.348799	0.294835	0.41848	0.585166	0.546019	0.614669	0.592243	0.557127	0.58887	0.57639	0.52688	0.36138	0.392679	0.392321	0.355301	0.329025	0.327149	0.404753	0.419997	0.40205	0.426662	0.4243	0.447555	0.395044	0.388568	0.383766	0.491906	0.320447	0.529085	0.558445	0.533572	0.43656	0.409174	0.428415	0.422959	0.551128	0.387145	0.371014	0.403391
0.580833	0.496141	0.532365	0.53132	0.326727	0.467478	0.408199	0.380073	0.372177	0.404693		0.351883	0.278371	0.385107	0.434113	0.42295	0.493214	0.438427	0.456661	0.474107	0.46341	0.42346	0.3826	0.388829	0.367748	0.372394	0.369766	0.328388	0.420659	0.427175	0.425591	0.41705	0.432	0.425869	0.393717	0.411402	0.411154	0.445186	0.317356	0.550158	0.494995	0.477339	0.416627	0.439464	0.366981	0.419958	0.502053	0.414111	0.433257	0.403689
0.677638	0.488009	0.520539	0.522532	0.34698	0.45968	0.423403	0.365949	0.388506	0.421154		0.3466	0.273093	0.386434	0.469706	0.449853	0.438764	0.446351	0.46002	0.445448	0.496389	0.444167	0.359688	0.33491	0.365282	0.371737	0.376562	0.297354	0.41045	0.387862	0.350693	0.349023	0.406027	0.389526	0.379741	0.362329	0.363326	0.413374	0.30518	0.508134	0.46904	0.446612	0.384945	0.359745	0.383183	0.354613	0.514776	0.401353	0.358166	0.354612
0.774443	0.50222	0.513066	0.514024	0.301128	0.460428	0.402399	0.399176	0.418733	0.430017		0.337042	0.267657	0.375996	0.405389	0.410244	0.401048	0.380909	0.380423	0.427529	0.41362	0.423847	0.361019	0.317609	0.391663	0.368167	0.314524	0.299326	0.420103	0.406353	0.38339	0.387769	0.382729	0.406696	0.389313	0.37846	0.380032	0.407707	0.274749	0.479607	0.4267	0.432686	0.406048	0.340673	0.379703	0.357772	0.44358	0.371232	0.384913	0.328899
0.871249	0.461778	0.495344	0.508118	0.295883	0.475462	0.423706	0.436838	0.428245	0.428228		0.350223	0.264361	0.366993	0.376725	0.352855	0.37046	0.346319	0.359294	0.373547	0.405185	0.409841	0.379188	0.332321	0.365834	0.364483	0.317499	0.304741	0.402199	0.408035	0.395368	0.390101	0.353979	0.410183	0.366904	0.383622	0.37974	0.372593	0.273381	0.504296	0.419268	0.384604	0.335319	0.327168	0.370811	0.337355	0.486178	0.373564	0.350216	0.32164
0.968054	0.439745	0.472053	0.477658	0.305706	0.452957	0.403048	0.434532	0.406876	0.430835		0.360929	0.259281	0.377516	0.38496	0.404904	0.382148	0.372798	0.368178	0.375707	0.398007	0.363371	0.367596	0.387404	0.403159	0.396768	0.38449	0.319458	0.438401	0.452416	0.393681	0.380784	0.360093	0.434343	0.403131	0.372969	0.371479	0.401361	0.290908	0.451594	0.453781	0.432483	0.386064	0.314018	0.272226	0.292776	0.487212	0.358818	0.339289	0.314049
1.06486	0.439959	0.461204	0.478249	0.297251	0.464079	0.386082	0.417771	0.402788	0.411751		0.347048	0.230543	0.35683	0.414526	0.38209	0.379214	0.349498	0.366622	0.392353	0.368168	0.352508	0.351612	0.409344	0.368174	0.365139	0.270386	0.281956	0.40325	0.435979	0.36639	0.37952	0.338085	0.414712	0.356924	0.361553	0.352723	0.343158	0.241377	0.435563	0.405724	0.424798	0.323362	0.341072	0.31448	0.309281	0.465476	0.340267	0.305227	0.259681
1.16167	0.428449	0.459538	0.486406	0.289924	0.453553	0.389981	0.424505	0.432674	0.436975		0.361302	0.189438	0.354703	0.359382	0.337994	0.340549	0.34384	0.373957	0.39348	0.348118	0.369392	0.349572	0.362136	0.376757	0.377387	0.331014	0.277962	0.388152	0.438782	0.381928	0.405478	0.404735	0.424294	0.377847	0.387706	0.380959	0.361068	0.255996	0.393401	0.379865	0.390481	0.332336	0.333631	0.29884	0.303011	0.445663	0.300079	0.34938	0.34478
1.25847	0.404524	0.444556	0.433109	0.27835	0.444567	0.378244	0.451264	0.45579	0.435552		0.364096	0.174143	0.342375	0.392636	0.378755	0.394113	0.366538	0.402962	0.368536	0.415408	0.360336	0.353736	0.301374	0.332151	0.361873	0.263804	0.307319	0.390597	0.426901	0.339456	0.387542	0.394463	0.435964	0.352364	0.368388	0.3613	0.339471	0.264715	0.29767	0.359875	0.377669	0.335914	0.310732	0.31555	0.322837	0.363545	0.352849	0.326787	0.352558
1.35528	0.387108	0.417964	0.404949	0.268551	0.428165	0.354813	0.433432	0.416189	0.466361		0.332239	0.183074	0.354989	0.347178	0.368763	0.367608	0.336335	0.347311	0.387821	0.358878	0.325359	0.338325	0.319056	0.316302	0.352061	0.313652	0.271876	0.380889	0.405612	0.302727	0.32782	0.315308	0.399132	0.297861	0.346005	0.33865	0.338219	0.251107	0.39212	0.300452	0.337003	0.308157	0.298331	0.281326	0.298413	0.422606	0.296885	0.300354	0.321735
1.45208	0.381692	0.428171	0.430177	0.276881	0.456009	0.384992	0.404004	0.403249	0.387355		0.303692	0.179509	0.327505	0.374619	0.38712	0.406731	0.353582	0.352082	0.361256	0.422439	0.394505	0.337513	0.306983	0.323472	0.350159	0.293861	0.26147	0.339725	0.370629	0.32658	0.301709	0.303546	0.385229	0.330249	0.330731	0.325452	0.335173	0.279969	0.354856	0.338863	0.343976	0.312937	0.322315	0.27779	0.311879	0.414284	0.336154	0.279035	0.31405
1.54889	0.433212	0.438605	0.466355	0.18425	0.408903	0.343602	0.384395	0.351099	0.351099		0.429633	0.208666	0.273145	0.362917	0.271166	0.271166	0.271166	0.271166	0.271166	0.271166	0.271166	0.260225	0.308358	0.447439	0.353964	0.343219	0.240463	0.261494	0.313601	0.360334	0.300519	0.288746	0.358923	0.275425	0.337716	0.327112	0.324019	0.314081	0.334826	0.323031	0.353513	0.288495	0.271424	0.233243	0.251193	0.292639	0.352326	0.325179	0.299568
1.64569	NaN	NaN	NaN	NaN	NaN	NaN	NaN	NaN	NaN		NaN	NaN	NaN	NaN	NaN	NaN	NaN	NaN	NaN	NaN	NaN	0.270327	0.270327	0.270327	0.270327	0.270327	0.270327	0.270327	0.270327	0.270327	0.270327	0.270327	0.270327	0.270327	0.270327	0.270327	NaN	NaN	NaN	NaN	NaN	NaN	NaN	NaN	NaN	NaN	NaN	NaN	NaN
1.7425	NaN	NaN	NaN	NaN	NaN	NaN	NaN	NaN	NaN		NaN	NaN	NaN	NaN	NaN	NaN	NaN	NaN	NaN	NaN	NaN	0.379667	0.379667	0.379667	0.379667	0.379667	0.379667	0.379667	0.379667	0.379667	0.379667	0.379667	0.379667	0.379667	0.379667	0.379667	NaN	NaN	NaN	NaN	NaN	NaN	NaN	NaN	NaN	NaN	NaN	NaN	NaN
1.8393	NaN	NaN	NaN	NaN	NaN	NaN	NaN	NaN	NaN		NaN	NaN	NaN	NaN	NaN	NaN	NaN	NaN	NaN	NaN	NaN	0.327483	0.327483	0.327483	0.327483	0.327483	0.327483	0.327483	0.327483	0.327483	0.327483	0.327483	0.327483	0.327483	0.327483	0.327483	NaN	NaN	NaN	NaN	NaN	NaN	NaN	NaN	NaN	NaN	NaN	NaN	NaN
1.93611	NaN	NaN	NaN	NaN	NaN	NaN	NaN	NaN	NaN		NaN	NaN	NaN	NaN	NaN	NaN	NaN	NaN	NaN	NaN	NaN	0.340229	0.340229	0.340229	0.340229	0.340229	0.340229	0.340229	0.340229	0.340229	0.340229	0.340229	0.340229	0.340229	0.340229	0.340229	NaN	NaN	NaN	NaN	NaN	NaN	NaN	NaN	NaN	NaN	NaN	NaN	NaN
2.03291	NaN	NaN	NaN	NaN	NaN	NaN	NaN	NaN	NaN		NaN	NaN	NaN	NaN	NaN	NaN	NaN	NaN	NaN	NaN	NaN	0.32193	0.32193	0.32193	0.32193	0.32193	0.32193	0.32193	0.32193	0.32193	0.32193	0.32193	0.32193	0.32193	0.32193	0.32193	NaN	NaN	NaN	NaN	NaN	NaN	NaN	NaN	NaN	NaN	NaN	NaN	NaN
2.12972	NaN	NaN	NaN	NaN	NaN	NaN	NaN	NaN	NaN		NaN	NaN	NaN	NaN	NaN	NaN	NaN	NaN	NaN	NaN	NaN	0.377759	0.377759	0.377759	0.377759	0.377759	0.377759	0.377759	0.377759	0.377759	0.377759	0.377759	0.377759	0.377759	0.377759	0.377759	NaN	NaN	NaN	NaN	NaN	NaN	NaN	NaN	NaN	NaN	NaN	NaN	NaN
2.22652	NaN	NaN	NaN	NaN	NaN	NaN	NaN	NaN	NaN		NaN	NaN	NaN	NaN	NaN	NaN	NaN	NaN	NaN	NaN	NaN	0.326971	0.326971	0.326971	0.326971	0.326971	0.326971	0.326971	0.326971	0.326971	0.326971	0.326971	0.326971	0.326971	0.326971	0.326971	NaN	NaN	NaN	NaN	NaN	NaN	NaN	NaN	NaN	NaN	NaN	NaN	NaN
2.32333	NaN	NaN	NaN	NaN	NaN	NaN	NaN	NaN	NaN		NaN	NaN	NaN	NaN	NaN	NaN	NaN	NaN	NaN	NaN	NaN	0.381713	0.381713	0.381713	0.381713	0.381713	0.381713	0.381713	0.381713	0.381713	0.381713	0.381713	0.381713	0.381713	0.381713	0.381713	NaN	NaN	NaN	NaN	NaN	NaN	NaN	NaN	NaN	NaN	NaN	NaN	NaN
2.42014	NaN	NaN	NaN	NaN	NaN	NaN	NaN	NaN	NaN		NaN	NaN	NaN	NaN	NaN	NaN	NaN	NaN	NaN	NaN	NaN	0.209983	0.209983	0.209983	0.209983	0.209983	0.209983	0.209983	0.209983	0.209983	0.209983	0.209983	0.209983	0.209983	0.209983	0.209983	NaN	NaN	NaN	NaN	NaN	NaN	NaN	NaN	NaN	NaN	NaN	NaN	NaN
2.51694	NaN	NaN	NaN	NaN	NaN	NaN	NaN	NaN	NaN		NaN	NaN	NaN	NaN	NaN	NaN	NaN	NaN	NaN	NaN	NaN	0.471263	0.471263	0.471263	0.471263	0.471263	0.471263	0.471263	0.471263	0.471263	0.471263	0.471263	0.471263	0.471263	0.471263	0.471263	NaN	NaN	NaN	NaN	NaN	NaN	NaN	NaN	NaN	NaN	NaN	NaN	NaN
2.61375	NaN	NaN	NaN	NaN	NaN	NaN	NaN	NaN	NaN		NaN	NaN	NaN	NaN	NaN	NaN	NaN	NaN	NaN	NaN	NaN	0.370918	0.370918	0.370918	0.370918	0.370918	0.370918	0.370918	0.370918	0.370918	0.370918	0.370918	0.370918	0.370918	0.370918	0.370918	NaN	NaN	NaN	NaN	NaN	NaN	NaN	NaN	NaN	NaN	NaN	NaN	NaN
2.71055	NaN	NaN	NaN	NaN	NaN	NaN	NaN	NaN	NaN		NaN	NaN	NaN	NaN	NaN	NaN	NaN	NaN	NaN	NaN	NaN	0.305898	0.305898	0.305898	0.305898	0.305898	0.305898	0.305898	0.305898	0.305898	0.305898	0.305898	0.305898	0.305898	0.305898	0.305898	NaN	NaN	NaN	NaN	NaN	NaN	NaN	NaN	NaN	NaN	NaN	NaN	NaN
2.80736	NaN	NaN	NaN	NaN	NaN	NaN	NaN	NaN	NaN		NaN	NaN	NaN	NaN	NaN	NaN	NaN	NaN	NaN	NaN	NaN	0.275311	0.275311	0.275311	0.275311	0.275311	0.275311	0.275311	0.275311	0.275311	0.275311	0.275311	0.275311	0.275311	0.275311	0.275311	NaN	NaN	NaN	NaN	NaN	NaN	NaN	NaN	NaN	NaN	NaN	NaN	NaN
2.90416	NaN	NaN	NaN	NaN	NaN	NaN	NaN	NaN	NaN		NaN	NaN	NaN	NaN	NaN	NaN	NaN	NaN	NaN	NaN	NaN	0.335728	0.335728	0.335728	0.335728	0.335728	0.335728	0.335728	0.335728	0.335728	0.335728	0.335728	0.335728	0.335728	0.335728	0.335728	NaN	NaN	NaN	NaN	NaN	NaN	NaN	NaN	NaN	NaN	NaN	NaN	NaN
3.00097	NaN	NaN	NaN	NaN	NaN	NaN	NaN	NaN	NaN		NaN	NaN	NaN	NaN	NaN	NaN	NaN	NaN	NaN	NaN	NaN	NaN	NaN	NaN	NaN	NaN	NaN	NaN	NaN	NaN	NaN	NaN	NaN	NaN	NaN	NaN	NaN	NaN	NaN	NaN	NaN	NaN	NaN	NaN	NaN	NaN	NaN	NaN	NaN
3.09777	NaN	NaN	NaN	NaN	NaN	NaN	NaN	NaN	NaN		NaN	NaN	NaN	NaN	NaN	NaN	NaN	NaN	NaN	NaN	NaN	NaN	NaN	NaN	NaN	NaN	NaN	NaN	NaN	NaN	NaN	NaN	NaN	NaN	NaN	NaN	NaN	NaN	NaN	NaN	NaN	NaN	NaN	NaN	NaN	NaN	NaN	NaN	NaN
3.19458	NaN	NaN	NaN	NaN	NaN	NaN	NaN	NaN	NaN		NaN	NaN	NaN	NaN	NaN	NaN	NaN	NaN	NaN	NaN	NaN	NaN	NaN	NaN	NaN	NaN	NaN	NaN	NaN	NaN	NaN	NaN	NaN	NaN	NaN	NaN	NaN	NaN	NaN	NaN	NaN	NaN	NaN	NaN	NaN	NaN	NaN	NaN	NaN
3.29138	NaN	NaN	NaN	NaN	NaN	NaN	NaN	NaN	NaN		NaN	NaN	NaN	NaN	NaN	NaN	NaN	NaN	NaN	NaN	NaN	NaN	NaN	NaN	NaN	NaN	NaN	NaN	NaN	NaN	NaN	NaN	NaN	NaN	NaN	NaN	NaN	NaN	NaN	NaN	NaN	NaN	NaN	NaN	NaN	NaN	NaN	NaN	NaN
3.38819	NaN	NaN	NaN	NaN	NaN	NaN	NaN	NaN	NaN		NaN	NaN	NaN	NaN	NaN	NaN	NaN	NaN	NaN	NaN	NaN	NaN	NaN	NaN	NaN	NaN	NaN	NaN	NaN	NaN	NaN	NaN	NaN	NaN	NaN	NaN	NaN	NaN	NaN	NaN	NaN	NaN	NaN	NaN	NaN	NaN	NaN	NaN	NaN
3.485	NaN	NaN	NaN	NaN	NaN	NaN	NaN	NaN	NaN		NaN	NaN	NaN	NaN	NaN	NaN	NaN	NaN	NaN	NaN	NaN	NaN	NaN	NaN	NaN	NaN	NaN	NaN	NaN	NaN	NaN	NaN	NaN	NaN	NaN	NaN	NaN	NaN	NaN	NaN	NaN	NaN	NaN	NaN	NaN	NaN	NaN	NaN	NaN
3.5818	NaN	NaN	NaN	NaN	NaN	NaN	NaN	NaN	NaN		NaN	NaN	NaN	NaN	NaN	NaN	NaN	NaN	NaN	NaN	NaN	NaN	NaN	NaN	NaN	NaN	NaN	NaN	NaN	NaN	NaN	NaN	NaN	NaN	NaN	NaN	NaN	NaN	NaN	NaN	NaN	NaN	NaN	NaN	NaN	NaN	NaN	NaN	NaN
3.67861	NaN	NaN	NaN	NaN	NaN	NaN	NaN	NaN	NaN		NaN	NaN	NaN	NaN	NaN	NaN	NaN	NaN	NaN	NaN	NaN	NaN	NaN	NaN	NaN	NaN	NaN	NaN	NaN	NaN	NaN	NaN	NaN	NaN	NaN	NaN	NaN	NaN	NaN	NaN	NaN	NaN	NaN	NaN	NaN	NaN	NaN	NaN	NaN
3.77541	NaN	NaN	NaN	NaN	NaN	NaN	NaN	NaN	NaN		NaN	NaN	NaN	NaN	NaN	NaN	NaN	NaN	NaN	NaN	NaN	NaN	NaN	NaN	NaN	NaN	NaN	NaN	NaN	NaN	NaN	NaN	NaN	NaN	NaN	NaN	NaN	NaN	NaN	NaN	NaN	NaN	NaN	NaN	NaN	NaN	NaN	NaN	NaN
3.87222	NaN	NaN	NaN	NaN	NaN	NaN	NaN	NaN	NaN		NaN	NaN	NaN	NaN	NaN	NaN	NaN	NaN	NaN	NaN	NaN	NaN	NaN	NaN	NaN	NaN	NaN	NaN	NaN	NaN	NaN	NaN	NaN	NaN	NaN	NaN	NaN	NaN	NaN	NaN	NaN	NaN	NaN	NaN	NaN	NaN	NaN	NaN	NaN
3.96902	NaN	NaN	NaN	NaN	NaN	NaN	NaN	NaN	NaN		NaN	NaN	NaN	NaN	NaN	NaN	NaN	NaN	NaN	NaN	NaN	NaN	NaN	NaN	NaN	NaN	NaN	NaN	NaN	NaN	NaN	NaN	NaN	NaN	NaN	NaN	NaN	NaN	NaN	NaN	NaN	NaN	NaN	NaN	NaN	NaN	NaN	NaN	NaN
4.06583	NaN	NaN	NaN	NaN	NaN	NaN	NaN	NaN	NaN		NaN	NaN	NaN	NaN	NaN	NaN	NaN	NaN	NaN	NaN	NaN	NaN	NaN	NaN	NaN	NaN	NaN	NaN	NaN	NaN	NaN	NaN	NaN	NaN	NaN	NaN	NaN	NaN	NaN	NaN	NaN	NaN	NaN	NaN	NaN	NaN	NaN	NaN	NaN
4.16263	NaN	NaN	NaN	NaN	NaN	NaN	NaN	NaN	NaN		NaN	NaN	NaN	NaN	NaN	NaN	NaN	NaN	NaN	NaN	NaN	NaN	NaN	NaN	NaN	NaN	NaN	NaN	NaN	NaN	NaN	NaN	NaN	NaN	NaN	NaN	NaN	NaN	NaN	NaN	NaN	NaN	NaN	NaN	NaN	NaN	NaN	NaN	NaN
4.25944	NaN	NaN	NaN	NaN	NaN	NaN	NaN	NaN	NaN		NaN	NaN	NaN	NaN	NaN	NaN	NaN	NaN	NaN	NaN	NaN	NaN	NaN	NaN	NaN	NaN	NaN	NaN	NaN	NaN	NaN	NaN	NaN	NaN	NaN	NaN	NaN	NaN	NaN	NaN	NaN	NaN	NaN	NaN	NaN	NaN	NaN	NaN	NaN
4.35624	NaN	NaN	NaN	NaN	NaN	NaN	NaN	NaN	NaN		NaN	NaN	NaN	NaN	NaN	NaN	NaN	NaN	NaN	NaN	NaN	NaN	NaN	NaN	NaN	NaN	NaN	NaN	NaN	NaN	NaN	NaN	NaN	NaN	NaN	NaN	NaN	NaN	NaN	NaN	NaN	NaN	NaN	NaN	NaN	NaN	NaN	NaN	NaN
4.45305	NaN	NaN	NaN	NaN	NaN	NaN	NaN	NaN	NaN		NaN	NaN	NaN	NaN	NaN	NaN	NaN	NaN	NaN	NaN	NaN	NaN	NaN	NaN	NaN	NaN	NaN	NaN	NaN	NaN	NaN	NaN	NaN	NaN	NaN	NaN	NaN	NaN	NaN	NaN	NaN	NaN	NaN	NaN	NaN	NaN	NaN	NaN	NaN
4.54985	NaN	NaN	NaN	NaN	NaN	NaN	NaN	NaN	NaN		NaN	NaN	NaN	NaN	NaN	NaN	NaN	NaN	NaN	NaN	NaN	NaN	NaN	NaN	NaN	NaN	NaN	NaN	NaN	NaN	NaN	NaN	NaN	NaN	NaN	NaN	NaN	NaN	NaN	NaN	NaN	NaN	NaN	NaN	NaN	NaN	NaN	NaN	NaN
4.64666	NaN	NaN	NaN	NaN	NaN	NaN	NaN	NaN	NaN		NaN	NaN	NaN	NaN	NaN	NaN	NaN	NaN	NaN	NaN	NaN	NaN	NaN	NaN	NaN	NaN	NaN	NaN	NaN	NaN	NaN	NaN	NaN	NaN	NaN	NaN	NaN	NaN	NaN	NaN	NaN	NaN	NaN	NaN	NaN	NaN	NaN	NaN	NaN
4.74347	NaN	NaN	NaN	NaN	NaN	NaN	NaN	NaN	NaN		NaN	NaN	NaN	NaN	NaN	NaN	NaN	NaN	NaN	NaN	NaN	NaN	NaN	NaN	NaN	NaN	NaN	NaN	NaN	NaN	NaN	NaN	NaN	NaN	NaN	NaN	NaN	NaN	NaN	NaN	NaN	NaN	NaN	NaN	NaN	NaN	NaN	NaN	NaN
4.84027	NaN	NaN	NaN	NaN	NaN	NaN	NaN	NaN	NaN		NaN	NaN	NaN	NaN	NaN	NaN	NaN	NaN	NaN	NaN	NaN	NaN	NaN	NaN	NaN	NaN	NaN	NaN	NaN	NaN	NaN	NaN	NaN	NaN	NaN	NaN	NaN	NaN	NaN	NaN	NaN	NaN	NaN	NaN	NaN	NaN	NaN	NaN	NaN
4.93708	NaN	NaN	NaN	NaN	NaN	NaN	NaN	NaN	NaN		NaN	NaN	NaN	NaN	NaN	NaN	NaN	NaN	NaN	NaN	NaN	NaN	NaN	NaN	NaN	NaN	NaN	NaN	NaN	NaN	NaN	NaN	NaN	NaN	NaN	NaN	NaN	NaN	NaN	NaN	NaN	NaN	NaN	NaN	NaN	NaN	NaN	NaN	NaN
5.03388	NaN	NaN	NaN	NaN	NaN	NaN	NaN	NaN	NaN		NaN	NaN	NaN	NaN	NaN	NaN	NaN	NaN	NaN	NaN	NaN	NaN	NaN	NaN	NaN	NaN	NaN	NaN	NaN	NaN	NaN	NaN	NaN	NaN	NaN	NaN	NaN	NaN	NaN	NaN	NaN	NaN	NaN	NaN	NaN	NaN	NaN	NaN	NaN
5.13069	NaN	NaN	NaN	NaN	NaN	NaN	NaN	NaN	NaN		NaN	NaN	NaN	NaN	NaN	NaN	NaN	NaN	NaN	NaN	NaN	NaN	NaN	NaN	NaN	NaN	NaN	NaN	NaN	NaN	NaN	NaN	NaN	NaN	NaN	NaN	NaN	NaN	NaN	NaN	NaN	NaN	NaN	NaN	NaN	NaN	NaN	NaN	NaN
5.22749	NaN	NaN	NaN	NaN	NaN	NaN	NaN	NaN	NaN		NaN	NaN	NaN	NaN	NaN	NaN	NaN	NaN	NaN	NaN	NaN	NaN	NaN	NaN	NaN	NaN	NaN	NaN	NaN	NaN	NaN	NaN	NaN	NaN	NaN	NaN	NaN	NaN	NaN	NaN	NaN	NaN	NaN	NaN	NaN	NaN	NaN	NaN	NaN
5.3243	NaN	NaN	NaN	NaN	NaN	NaN	NaN	NaN	NaN		NaN	NaN	NaN	NaN	NaN	NaN	NaN	NaN	NaN	NaN	NaN	NaN	NaN	NaN	NaN	NaN	NaN	NaN	NaN	NaN	NaN	NaN	NaN	NaN	NaN	NaN	NaN	NaN	NaN	NaN	NaN	NaN	NaN	NaN	NaN	NaN	NaN	NaN	NaN
5.4211	NaN	NaN	NaN	NaN	NaN	NaN	NaN	NaN	NaN		NaN	NaN	NaN	NaN	NaN	NaN	NaN	NaN	NaN	NaN	NaN	NaN	NaN	NaN	NaN	NaN	NaN	NaN	NaN	NaN	NaN	NaN	NaN	NaN	NaN	NaN	NaN	NaN	NaN	NaN	NaN	NaN	NaN	NaN	NaN	NaN	NaN	NaN	NaN
5.51791	NaN	NaN	NaN	NaN	NaN	NaN	NaN	NaN	NaN		NaN	NaN	NaN	NaN	NaN	NaN	NaN	NaN	NaN	NaN	NaN	NaN	NaN	NaN	NaN	NaN	NaN	NaN	NaN	NaN	NaN	NaN	NaN	NaN	NaN	NaN	NaN	NaN	NaN	NaN	NaN	NaN	NaN	NaN	NaN	NaN	NaN	NaN	NaN
5.61471	NaN	NaN	NaN	NaN	NaN	NaN	NaN	NaN	NaN		NaN	NaN	NaN	NaN	NaN	NaN	NaN	NaN	NaN	NaN	NaN	NaN	NaN	NaN	NaN	NaN	NaN	NaN	NaN	NaN	NaN	NaN	NaN	NaN	NaN	NaN	NaN	NaN	NaN	NaN	NaN	NaN	NaN	NaN	NaN	NaN	NaN	NaN	NaN
5.71152	NaN	NaN	NaN	NaN	NaN	NaN	NaN	NaN	NaN		NaN	NaN	NaN	NaN	NaN	NaN	NaN	NaN	NaN	NaN	NaN	NaN	NaN	NaN	NaN	NaN	NaN	NaN	NaN	NaN	NaN	NaN	NaN	NaN	NaN	NaN	NaN	NaN	NaN	NaN	NaN	NaN	NaN	NaN	NaN	NaN	NaN	NaN	NaN
5.80833	NaN	NaN	NaN	NaN	NaN	NaN	NaN	NaN	NaN		NaN	NaN	NaN	NaN	NaN	NaN	NaN	NaN	NaN	NaN	NaN	NaN	NaN	NaN	NaN	NaN	NaN	NaN	NaN	NaN	NaN	NaN	NaN	NaN	NaN	NaN	NaN	NaN	NaN	NaN	NaN	NaN	NaN	NaN	NaN	NaN	NaN	NaN	NaN
5.90513	NaN	NaN	NaN	NaN	NaN	NaN	NaN	NaN	NaN		NaN	NaN	NaN	NaN	NaN	NaN	NaN	NaN	NaN	NaN	NaN	NaN	NaN	NaN	NaN	NaN	NaN	NaN	NaN	NaN	NaN	NaN	NaN	NaN	NaN	NaN	NaN	NaN	NaN	NaN	NaN	NaN	NaN	NaN	NaN	NaN	NaN	NaN	NaN
6.00194	NaN	NaN	NaN	NaN	NaN	NaN	NaN	NaN	NaN		NaN	NaN	NaN	NaN	NaN	NaN	NaN	NaN	NaN	NaN	NaN	NaN	NaN	NaN	NaN	NaN	NaN	NaN	NaN	NaN	NaN	NaN	NaN	NaN	NaN	NaN	NaN	NaN	NaN	NaN	NaN	NaN	NaN	NaN	NaN	NaN	NaN	NaN	NaN
6.09874	NaN	NaN	NaN	NaN	NaN	NaN	NaN	NaN	NaN		NaN	NaN	NaN	NaN	NaN	NaN	NaN	NaN	NaN	NaN	NaN	NaN	NaN	NaN	NaN	NaN	NaN	NaN	NaN	NaN	NaN	NaN	NaN	NaN	NaN	NaN	NaN	NaN	NaN	NaN	NaN	NaN	NaN	NaN	NaN	NaN	NaN	NaN	NaN
6.19555	NaN	NaN	NaN	NaN	NaN	NaN	NaN	NaN	NaN		NaN	NaN	NaN	NaN	NaN	NaN	NaN	NaN	NaN	NaN	NaN	NaN	NaN	NaN	NaN	NaN	NaN	NaN	NaN	NaN	NaN	NaN	NaN	NaN	NaN	NaN	NaN	NaN	NaN	NaN	NaN	NaN	NaN	NaN	NaN	NaN	NaN	NaN	NaN
6.29235	NaN	NaN	NaN	NaN	NaN	NaN	NaN	NaN	NaN		NaN	NaN	NaN	NaN	NaN	NaN	NaN	NaN	NaN	NaN	NaN	NaN	NaN	NaN	NaN	NaN	NaN	NaN	NaN	NaN	NaN	NaN	NaN	NaN	NaN	NaN	NaN	NaN	NaN	NaN	NaN	NaN	NaN	NaN	NaN	NaN	NaN	NaN	NaN
6.38916	NaN	NaN	NaN	NaN	NaN	NaN	NaN	NaN	NaN		NaN	NaN	NaN	NaN	NaN	NaN	NaN	NaN	NaN	NaN	NaN	NaN	NaN	NaN	NaN	NaN	NaN	NaN	NaN	NaN	NaN	NaN	NaN	NaN	NaN	NaN	NaN	NaN	NaN	NaN	NaN	NaN	NaN	NaN	NaN	NaN	NaN	NaN	NaN
6.48596	NaN	NaN	NaN	NaN	NaN	NaN	NaN	NaN	NaN		NaN	NaN	NaN	NaN	NaN	NaN	NaN	NaN	NaN	NaN	NaN	NaN	NaN	NaN	NaN	NaN	NaN	NaN	NaN	NaN	NaN	NaN	NaN	NaN	NaN	NaN	NaN	NaN	NaN	NaN	NaN	NaN	NaN	NaN	NaN	NaN	NaN	NaN	NaN
6.58277	NaN	NaN	NaN	NaN	NaN	NaN	NaN	NaN	NaN		NaN	NaN	NaN	NaN	NaN	NaN	NaN	NaN	NaN	NaN	NaN	NaN	NaN	NaN	NaN	NaN	NaN	NaN	NaN	NaN	NaN	NaN	NaN	NaN	NaN	NaN	NaN	NaN	NaN	NaN	NaN	NaN	NaN	NaN	NaN	NaN	NaN	NaN	NaN
6.67957	NaN	NaN	NaN	NaN	NaN	NaN	NaN	NaN	NaN		NaN	NaN	NaN	NaN	NaN	NaN	NaN	NaN	NaN	NaN	NaN	NaN	NaN	NaN	NaN	NaN	NaN	NaN	NaN	NaN	NaN	NaN	NaN	NaN	NaN	NaN	NaN	NaN	NaN	NaN	NaN	NaN	NaN	NaN	NaN	NaN	NaN	NaN	NaN
6.77638	NaN	NaN	NaN	NaN	NaN	NaN	NaN	NaN	NaN		NaN	NaN	NaN	NaN	NaN	NaN	NaN	NaN	NaN	NaN	NaN	NaN	NaN	NaN	NaN	NaN	NaN	NaN	NaN	NaN	NaN	NaN	NaN	NaN	NaN	NaN	NaN	NaN	NaN	NaN	NaN	NaN	NaN	NaN	NaN	NaN	NaN	NaN	NaN
6.87318	NaN	NaN	NaN	NaN	NaN	NaN	NaN	NaN	NaN		NaN	NaN	NaN	NaN	NaN	NaN	NaN	NaN	NaN	NaN	NaN	NaN	NaN	NaN	NaN	NaN	NaN	NaN	NaN	NaN	NaN	NaN	NaN	NaN	NaN	NaN	NaN	NaN	NaN	NaN	NaN	NaN	NaN	NaN	NaN	NaN	NaN	NaN	NaN
6.96999	NaN	NaN	NaN	NaN	NaN	NaN	NaN	NaN	NaN		NaN	NaN	NaN	NaN	NaN	NaN	NaN	NaN	NaN	NaN	NaN	NaN	NaN	NaN	NaN	NaN	NaN	NaN	NaN	NaN	NaN	NaN	NaN	NaN	NaN	NaN	NaN	NaN	NaN	NaN	NaN	NaN	NaN	NaN	NaN	NaN	NaN	NaN	NaN
7.0668	NaN	NaN	NaN	NaN	NaN	NaN	NaN	NaN	NaN		NaN	NaN	NaN	NaN	NaN	NaN	NaN	NaN	NaN	NaN	NaN	NaN	NaN	NaN	NaN	NaN	NaN	NaN	NaN	NaN	NaN	NaN	NaN	NaN	NaN	NaN	NaN	NaN	NaN	NaN	NaN	NaN	NaN	NaN	NaN	NaN	NaN	NaN	NaN
7.1636	NaN	NaN	NaN	NaN	NaN	NaN	NaN	NaN	NaN		NaN	NaN	NaN	NaN	NaN	NaN	NaN	NaN	NaN	NaN	NaN	NaN	NaN	NaN	NaN	NaN	NaN	NaN	NaN	NaN	NaN	NaN	NaN	NaN	NaN	NaN	NaN	NaN	NaN	NaN	NaN	NaN	NaN	NaN	NaN	NaN	NaN	NaN	NaN
7.26041	NaN	NaN	NaN	NaN	NaN	NaN	NaN	NaN	NaN		NaN	NaN	NaN	NaN	NaN	NaN	NaN	NaN	NaN	NaN	NaN	NaN	NaN	NaN	NaN	NaN	NaN	NaN	NaN	NaN	NaN	NaN	NaN	NaN	NaN	NaN	NaN	NaN	NaN	NaN	NaN	NaN	NaN	NaN	NaN	NaN	NaN	NaN	NaN
7.35721	NaN	NaN	NaN	NaN	NaN	NaN	NaN	NaN	NaN		NaN	NaN	NaN	NaN	NaN	NaN	NaN	NaN	NaN	NaN	NaN	NaN	NaN	NaN	NaN	NaN	NaN	NaN	NaN	NaN	NaN	NaN	NaN	NaN	NaN	NaN	NaN	NaN	NaN	NaN	NaN	NaN	NaN	NaN	NaN	NaN	NaN	NaN	NaN
7.45402	NaN	NaN	NaN	NaN	NaN	NaN	NaN	NaN	NaN		NaN	NaN	NaN	NaN	NaN	NaN	NaN	NaN	NaN	NaN	NaN	NaN	NaN	NaN	NaN	NaN	NaN	NaN	NaN	NaN	NaN	NaN	NaN	NaN	NaN	NaN	NaN	NaN	NaN	NaN	NaN	NaN	NaN	NaN	NaN	NaN	NaN	NaN	NaN
7.55082	NaN	NaN	NaN	NaN	NaN	NaN	NaN	NaN	NaN		NaN	NaN	NaN	NaN	NaN	NaN	NaN	NaN	NaN	NaN	NaN	NaN	NaN	NaN	NaN	NaN	NaN	NaN	NaN	NaN	NaN	NaN	NaN	NaN	NaN	NaN	NaN	NaN	NaN	NaN	NaN	NaN	NaN	NaN	NaN	NaN	NaN	NaN	NaN
7.64763	NaN	NaN	NaN	NaN	NaN	NaN	NaN	NaN	NaN		NaN	NaN	NaN	NaN	NaN	NaN	NaN	NaN	NaN	NaN	NaN	NaN	NaN	NaN	NaN	NaN	NaN	NaN	NaN	NaN	NaN	NaN	NaN	NaN	NaN	NaN	NaN	NaN	NaN	NaN	NaN	NaN	NaN	NaN	NaN	NaN	NaN	NaN	NaN
7.74443	NaN	NaN	NaN	NaN	NaN	NaN	NaN	NaN	NaN		NaN	NaN	NaN	NaN	NaN	NaN	NaN	NaN	NaN	NaN	NaN	NaN	NaN	NaN	NaN	NaN	NaN	NaN	NaN	NaN	NaN	NaN	NaN	NaN	NaN	NaN	NaN	NaN	NaN	NaN	NaN	NaN	NaN	NaN	NaN	NaN	NaN	NaN	NaN
7.84124	NaN	NaN	NaN	NaN	NaN	NaN	NaN	NaN	NaN		NaN	NaN	NaN	NaN	NaN	NaN	NaN	NaN	NaN	NaN	NaN	NaN	NaN	NaN	NaN	NaN	NaN	NaN	NaN	NaN	NaN	NaN	NaN	NaN	NaN	NaN	NaN	NaN	NaN	NaN	NaN	NaN	NaN	NaN	NaN	NaN	NaN	NaN	NaN
7.93804	NaN	NaN	NaN	NaN	NaN	NaN	NaN	NaN	NaN		NaN	NaN	NaN	NaN	NaN	NaN	NaN	NaN	NaN	NaN	NaN	NaN	NaN	NaN	NaN	NaN	NaN	NaN	NaN	NaN	NaN	NaN	NaN	NaN	NaN	NaN	NaN	NaN	NaN	NaN	NaN	NaN	NaN	NaN	NaN	NaN	NaN	NaN	NaN
8.03485	NaN	NaN	NaN	NaN	NaN	NaN	NaN	NaN	NaN		NaN	NaN	NaN	NaN	NaN	NaN	NaN	NaN	NaN	NaN	NaN	NaN	NaN	NaN	NaN	NaN	NaN	NaN	NaN	NaN	NaN	NaN	NaN	NaN	NaN	NaN	NaN	NaN	NaN	NaN	NaN	NaN	NaN	NaN	NaN	NaN	NaN	NaN	NaN
8.13166	NaN	NaN	NaN	NaN	NaN	NaN	NaN	NaN	NaN		NaN	NaN	NaN	NaN	NaN	NaN	NaN	NaN	NaN	NaN	NaN	NaN	NaN	NaN	NaN	NaN	NaN	NaN	NaN	NaN	NaN	NaN	NaN	NaN	NaN	NaN	NaN	NaN	NaN	NaN	NaN	NaN	NaN	NaN	NaN	NaN	NaN	NaN	NaN
8.22846	NaN	NaN	NaN	NaN	NaN	NaN	NaN	NaN	NaN		NaN	NaN	NaN	NaN	NaN	NaN	NaN	NaN	NaN	NaN	NaN	NaN	NaN	NaN	NaN	NaN	NaN	NaN	NaN	NaN	NaN	NaN	NaN	NaN	NaN	NaN	NaN	NaN	NaN	NaN	NaN	NaN	NaN	NaN	NaN	NaN	NaN	NaN	NaN
8.32527	NaN	NaN	NaN	NaN	NaN	NaN	NaN	NaN	NaN		NaN	NaN	NaN	NaN	NaN	NaN	NaN	NaN	NaN	NaN	NaN	NaN	NaN	NaN	NaN	NaN	NaN	NaN	NaN	NaN	NaN	NaN	NaN	NaN	NaN	NaN	NaN	NaN	NaN	NaN	NaN	NaN	NaN	NaN	NaN	NaN	NaN	NaN	NaN
8.42207	NaN	NaN	NaN	NaN	NaN	NaN	NaN	NaN	NaN		NaN	NaN	NaN	NaN	NaN	NaN	NaN	NaN	NaN	NaN	NaN	NaN	NaN	NaN	NaN	NaN	NaN	NaN	NaN	NaN	NaN	NaN	NaN	NaN	NaN	NaN	NaN	NaN	NaN	NaN	NaN	NaN	NaN	NaN	NaN	NaN	NaN	NaN	NaN
8.51888	NaN	NaN	NaN	NaN	NaN	NaN	NaN	NaN	NaN		NaN	NaN	NaN	NaN	NaN	NaN	NaN	NaN	NaN	NaN	NaN	NaN	NaN	NaN	NaN	NaN	NaN	NaN	NaN	NaN	NaN	NaN	NaN	NaN	NaN	NaN	NaN	NaN	NaN	NaN	NaN	NaN	NaN	NaN	NaN	NaN	NaN	NaN	NaN
8.61568	NaN	NaN	NaN	NaN	NaN	NaN	NaN	NaN	NaN		NaN	NaN	NaN	NaN	NaN	NaN	NaN	NaN	NaN	NaN	NaN	NaN	NaN	NaN	NaN	NaN	NaN	NaN	NaN	NaN	NaN	NaN	NaN	NaN	NaN	NaN	NaN	NaN	NaN	NaN	NaN	NaN	NaN	NaN	NaN	NaN	NaN	NaN	NaN
8.71249	NaN	NaN	NaN	NaN	NaN	NaN	NaN	NaN	NaN		NaN	NaN	NaN	NaN	NaN	NaN	NaN	NaN	NaN	NaN	NaN	NaN	NaN	NaN	NaN	NaN	NaN	NaN	NaN	NaN	NaN	NaN	NaN	NaN	NaN	NaN	NaN	NaN	NaN	NaN	NaN	NaN	NaN	NaN	NaN	NaN	NaN	NaN	NaN
8.80929	NaN	NaN	NaN	NaN	NaN	NaN	NaN	NaN	NaN		NaN	NaN	NaN	NaN	NaN	NaN	NaN	NaN	NaN	NaN	NaN	NaN	NaN	NaN	NaN	NaN	NaN	NaN	NaN	NaN	NaN	NaN	NaN	NaN	NaN	NaN	NaN	NaN	NaN	NaN	NaN	NaN	NaN	NaN	NaN	NaN	NaN	NaN	NaN
8.9061	NaN	NaN	NaN	NaN	NaN	NaN	NaN	NaN	NaN		NaN	NaN	NaN	NaN	NaN	NaN	NaN	NaN	NaN	NaN	NaN	NaN	NaN	NaN	NaN	NaN	NaN	NaN	NaN	NaN	NaN	NaN	NaN	NaN	NaN	NaN	NaN	NaN	NaN	NaN	NaN	NaN	NaN	NaN	NaN	NaN	NaN	NaN	NaN
9.0029	NaN	NaN	NaN	NaN	NaN	NaN	NaN	NaN	NaN		NaN	NaN	NaN	NaN	NaN	NaN	NaN	NaN	NaN	NaN	NaN	NaN	NaN	NaN	NaN	NaN	NaN	NaN	NaN	NaN	NaN	NaN	NaN	NaN	NaN	NaN	NaN	NaN	NaN	NaN	NaN	NaN	NaN	NaN	NaN	NaN	NaN	NaN	NaN
9.09971	NaN	NaN	NaN	NaN	NaN	NaN	NaN	NaN	NaN		NaN	NaN	NaN	NaN	NaN	NaN	NaN	NaN	NaN	NaN	NaN	NaN	NaN	NaN	NaN	NaN	NaN	NaN	NaN	NaN	NaN	NaN	NaN	NaN	NaN	NaN	NaN	NaN	NaN	NaN	NaN	NaN	NaN	NaN	NaN	NaN	NaN	NaN	NaN
9.19652	NaN	NaN	NaN	NaN	NaN	NaN	NaN	NaN	NaN		NaN	NaN	NaN	NaN	NaN	NaN	NaN	NaN	NaN	NaN	NaN	NaN	NaN	NaN	NaN	NaN	NaN	NaN	NaN	NaN	NaN	NaN	NaN	NaN	NaN	NaN	NaN	NaN	NaN	NaN	NaN	NaN	NaN	NaN	NaN	NaN	NaN	NaN	NaN
9.29332	NaN	NaN	NaN	NaN	NaN	NaN	NaN	NaN	NaN		NaN	NaN	NaN	NaN	NaN	NaN	NaN	NaN	NaN	NaN	NaN	NaN	NaN	NaN	NaN	NaN	NaN	NaN	NaN	NaN	NaN	NaN	NaN	NaN	NaN	NaN	NaN	NaN	NaN	NaN	NaN	NaN	NaN	NaN	NaN	NaN	NaN	NaN	NaN
9.39013	NaN	NaN	NaN	NaN	NaN	NaN	NaN	NaN	NaN		NaN	NaN	NaN	NaN	NaN	NaN	NaN	NaN	NaN	NaN	NaN	NaN	NaN	NaN	NaN	NaN	NaN	NaN	NaN	NaN	NaN	NaN	NaN	NaN	NaN	NaN	NaN	NaN	NaN	NaN	NaN	NaN	NaN	NaN	NaN	NaN	NaN	NaN	NaN
9.48693	NaN	NaN	NaN	NaN	NaN	NaN	NaN	NaN	NaN		NaN	NaN	NaN	NaN	NaN	NaN	NaN	NaN	NaN	NaN	NaN	NaN	NaN	NaN	NaN	NaN	NaN	NaN	NaN	NaN	NaN	NaN	NaN	NaN	NaN	NaN	NaN	NaN	NaN	NaN	NaN	NaN	NaN	NaN	NaN	NaN	NaN	NaN	NaN
9.58374	NaN	NaN	NaN	NaN	NaN	NaN	NaN	NaN	NaN		NaN	NaN	NaN	NaN	NaN	NaN	NaN	NaN	NaN	NaN	NaN	NaN	NaN	NaN	NaN	NaN	NaN	NaN	NaN	NaN	NaN	NaN	NaN	NaN	NaN	NaN	NaN	NaN	NaN	NaN	NaN	NaN	NaN	NaN	NaN	NaN	NaN	NaN	NaN
9.68054	NaN	NaN	NaN	NaN	NaN	NaN	NaN	NaN	NaN		NaN	NaN	NaN	NaN	NaN	NaN	NaN	NaN	NaN	NaN	NaN	NaN	NaN	NaN	NaN	NaN	NaN	NaN	NaN	NaN	NaN	NaN	NaN	NaN	NaN	NaN	NaN	NaN	NaN	NaN	NaN	NaN	NaN	NaN	NaN	NaN	NaN	NaN	NaN
[truncated: 48 more columns]

## Sheet: supp 1 a.iii.
Supp 1 a. iii.	time to reward
	VTA axons					LC axons
	slope	r-squared				slope	r-squared
roi 1	0.0561462	0.866972			roi 1	-0.00144827	0.00805645
roi 2	0.036018	0.823058			roi 2	-0.048579	0.71648
roi 3	0.0938827	0.957882			roi 3	-0.0189025	0.31641
roi 4	0.0200778	0.644031			roi 4	0.00664649	0.0523899
roi 5	0.0194341	0.766106			roi 5	-0.00470234	0.0222291
roi 6	0.0257855	0.696777			roi 6	-0.000615215	0.000410283
roi 7	-0.000972772	0.00524649			roi 7	-0.00517962	0.0246716
roi 8	0.0111441	0.207429			roi 8	-0.00119924	0.00152766
roi 9	0.0132725	0.341377			roi 9	0.00846393	0.0566543
					roi 10	0.00313845	0.0105687
					roi 11	-0.00284481	0.00973558
					roi 12	-0.0194225	0.539254
					roi 13	-0.0173549	0.330727
					roi 14	0.000427243	0.00023913
					roi 15	0.0113864	0.317121
					roi 16	-0.0190641	0.328862
					roi 17	-0.0276265	0.71354
					roi 18	0.0166805	0.46314
					roi 19	0.00808899	0.204912
					roi 20	0.00239502	0.00908773
					roi 21	0.00997773	0.167267
					roi 22	0.019427	0.39024
					roi 23	0.00238443	0.0112521
					roi 24	0.00787491	0.146227
					roi 25	0.00382568	0.0381946
					roi 26	0.00301962	0.0224946
					roi 27	0.0686535	0.912651
					roi 28	-0.00172789	0.00587793
					roi 29	-0.00246795	0.00882689
					roi 30	-0.00370969	0.0195148
					roi 31	-4.55447e-05	2.97931e-06
					roi 32	0.00486025	0.0479578
					roi 33	0.0041727	0.041964
					roi 34	0.0199481	0.370178
					roi 35	0.0147562	0.185223
					roi 36	0.00194673	0.00469673
					roi 37	0.00827104	0.0737976
					roi 38	0.00844585	0.140488
					roi 39	0.00352716	0.0165037
					roi 40	0.00424174	0.036923
					roi 41	0.00547201	0.104911
					roi 42	0.00988008	0.211265
					roi 43	0.00128679	0.00732838
					roi 44	0.0150243	0.295029
					roi 45	-0.00100939	0.000976659
					roi 46	-0.0328677	0.669353
					roi 47	-0.0156109	0.0921827
					roi 48	-0.0262059	0.473694
					roi 49	-0.025421	0.438586
					roi 50	-0.0367054	0.607567
					roi 51	0.00885248	0.0655796
					roi 52	-0.0089157	0.192553
					roi 53	-0.00936181	0.171001
					roi 54	0.0127013	0.266025
					roi 55	0.00592861	0.110568
					roi 56	0.0104139	0.241753
					roi 57	0.00965896	0.287335
					roi 58	0.010194	0.17715
					roi 59	0.00554563	0.0762683
					roi 60	0.00640167	0.0833454
					roi 61	0.00292511	0.0152271
					roi 62	0.00433384	0.0479661
					roi 63	0.00639433	0.0706797
					roi 64	0.022573	0.459382
					roi 65	0.0161485	0.261881
					roi 66	-0.00254065	0.0128361
					roi 67	-0.00385139	0.0192976
					roi 68	-0.00791291	0.0689422
					roi 69	-0.00580823	0.0648756
					roi 70	-0.0150292	0.277939
					roi 71	-0.0198258	0.399665
					roi 72	-0.0188371	0.41637
					roi 73	-0.00765094	0.106869
					roi 74	-0.00244151	0.0160354
					roi 75	0.00191138	0.00806651
					roi 76	0.00318809	0.0191518
					roi 77	0.00765271	0.104622
					roi 78	0.00837436	0.147115
					roi 79	0.00629257	0.0793799
					roi 80	0.0101019	0.191665
					roi 81	0.0157617	0.462533
					roi 82	0.0177776	0.442806
					roi 83	0.00577381	0.0589538
					roi 84	0.0120859	0.297964
					roi 85	0.0116743	0.186493
					roi 86	0.00500553	0.052516
					roi 87	0.0128198	0.381786

## Sheet: supp 1 b.i
supp 1 b.i.	5cm position bins
	VTA axons										LC axons
distance from reward	roi 1	roi 2	roi 3	roi 4	roi 5	roi 6	roi 7	roi 8	roi 9		roi 1	roi 2	roi 3	roi 4	roi 5	roi 6	roi 7	roi 8	roi 9	roi 10	roi 11	roi 12	roi 13	roi 14	roi 15	roi 16	roi 17	roi 18	roi 19	roi 20	roi 21	roi 22	roi 23	roi 24	roi 25	roi 26	roi 27	roi 28	roi 29	roi 30	roi 31	roi 32	roi 33	roi 34	roi 35	roi 36	roi 37	roi 38	roi 39
-198.305	0.35631	0.247782	0.286638	0.253962	0.400572	0.441156	0.439212	0.441207	0.424557		0.383202	0.668983	0.519384	0.465849	0.744492	0.666387	0.550539	0.511947	0.582404	0.541247	0.490004	0.474207	0.628676	0.610945	0.41973	0.519989	0.697999	0.325137	0.24294	0.421976	0.457145	0.55642	0.478818	0.465543	0.389742	0.383802	0.557433	0.533443	0.599604	0.555418	0.506153	0.555383	0.64042	0.330445	0.590413	0.289157	0.483326	0.424731	0.565983
-193.22	0.336212	0.242235	0.247005	0.245308	0.361863	0.43492	0.417567	0.289895	0.373665		0.40552	0.692742	0.560185	0.494566	0.711352	0.604605	0.764214	0.539489	0.50069	0.514545	0.471037	0.526927	0.504491	0.515779	0.42259	0.636737	0.659923	0.380178	0.301137	0.484863	0.448998	0.51501	0.476175	0.55727	0.41379	0.407043	0.633453	0.529434	0.464455	0.629875	0.660043	0.617916	0.595376	0.469072	0.513704	0.277677	0.508857	0.409309	0.527367
-188.136	0.340778	0.292996	0.205221	0.24331	0.377783	0.352822	0.444207	0.307095	0.419211		0.329711	0.708267	0.585253	0.548878	0.696437	0.692059	0.583331	0.744287	0.549896	0.539613	0.631446	0.485074	0.465372	0.537337	0.414205	0.534741	0.641552	0.40089	0.223947	0.461997	0.411724	0.474085	0.541505	0.530775	0.398263	0.376116	0.603906	0.520852	0.478554	0.667739	0.661811	0.605197	0.61648	0.374766	0.617519	0.142376	0.479975	0.402961	0.636977
-183.051	0.337338	0.307489	0.201136	0.251555	0.386865	0.356776	0.431117	0.274122	0.336096		0.444065	0.639734	0.555685	0.510225	0.710829	0.476772	0.685456	0.566271	0.501048	0.542757	0.646915	0.543969	0.548878	0.64306	0.441943	0.694338	0.629377	0.395856	0.320828	0.518052	0.382592	0.46171	0.495437	0.557741	0.360669	0.341899	0.595096	0.472666	0.579601	0.677797	0.669519	0.592563	0.591654	0.425823	0.485376	0.26691	0.554976	0.41489	0.58935
-177.966	0.354339	0.305683	0.142144	0.231225	0.39403	0.399824	0.452982	0.242384	0.279849		0.369895	0.64396	0.589578	0.486378	0.634429	0.704581	0.800058	0.468317	0.452352	0.520953	0.442817	0.49591	0.602866	0.740835	0.447143	0.450445	0.661078	0.363242	0.315375	0.544697	0.410639	0.487025	0.558313	0.487613	0.320997	0.308009	0.614932	0.558023	0.58225	0.6701	0.55618	0.595046	0.734057	0.385042	0.628201	0.233058	0.549204	0.527317	0.513039
-172.881	0.334086	0.347793	0.148187	0.24458	0.397737	0.383047	0.439441	0.347205	0.339609		0.451006	0.69739	0.498461	0.548226	0.576403	0.601251	0.610687	0.489744	0.480322	0.377379	0.649559	0.591964	0.734519	0.480733	0.357658	0.516565	0.702477	0.355528	0.307943	0.474317	0.467996	0.555242	0.556677	0.497373	0.349803	0.336713	0.603176	0.472276	0.629959	0.690587	0.684123	0.647591	0.673191	0.415472	0.599276	0.237438	0.658807	0.50663	0.584185
-167.797	0.345765	0.367443	0.135914	0.233381	0.39936	0.403035	0.407813	0.230463	0.304256		0.399114	0.604678	0.544537	0.511462	0.669668	0.671823	0.671874	0.566869	0.599612	0.524413	0.699558	0.554282	0.441862	0.505499	0.427393	0.531081	0.72687	0.441974	0.300719	0.427828	0.401673	0.595084	0.507537	0.488249	0.428342	0.426084	0.614115	0.50103	0.568485	0.661485	0.549389	0.527589	0.721533	0.437797	0.705561	0.304506	0.508378	0.393903	0.523282
-162.712	0.365488	0.363402	0.132128	0.251239	0.40399	0.403937	0.438447	0.299473	0.32758		0.444752	0.720404	0.485511	0.568329	0.615878	0.621941	0.643411	0.502814	0.558802	0.363416	0.553911	0.384235	0.547264	0.556717	0.463618	0.472723	0.682432	0.444189	0.291691	0.451695	0.463982	0.579083	0.601265	0.519503	0.443977	0.435119	0.594056	0.474881	0.521619	0.649814	0.573886	0.405507	0.528203	0.43128	0.69117	0.329168	0.447002	0.367509	0.472253
-157.627	0.331483	0.402055	0.152141	0.254121	0.402251	0.445886	0.405015	0.270012	0.377922		0.522475	0.650325	0.531798	0.60656	0.600991	0.634585	0.725948	0.550986	0.514709	0.529709	0.596711	0.568968	0.667479	0.420196	0.393856	0.714766	0.706986	0.433105	0.331332	0.446845	0.504886	0.52516	0.615338	0.504079	0.482675	0.463535	0.620865	0.535785	0.556619	0.64592	0.624946	0.597202	0.582671	0.55052	0.568957	0.338644	0.620385	0.417011	0.507615
-152.542	0.352143	0.440778	0.128562	0.268164	0.403729	0.503912	0.413873	0.229202	0.339832		0.347941	0.703218	0.468631	0.520078	0.695539	0.600147	0.73963	0.587527	0.552556	0.747493	0.58533	0.509432	0.424268	0.422231	0.410935	0.60936	0.764879	0.480616	0.32789	0.529668	0.453525	0.525739	0.525453	0.49492	0.405681	0.362866	0.577807	0.498433	0.608642	0.665176	0.679419	0.526947	0.559698	0.494035	0.504741	0.451388	0.541817	0.406735	0.565298
-147.458	0.358247	0.4849	0.125951	0.282163	0.390045	0.541012	0.422956	0.307848	0.358719		0.509193	0.665249	0.489269	0.461649	0.741011	0.602388	0.747531	0.529931	0.530734	0.500072	0.516363	0.501879	0.577483	0.659195	0.410606	0.60036	0.704623	0.492001	0.295476	0.457063	0.520913	0.545377	0.480349	0.493733	0.444629	0.421668	0.553363	0.532859	0.686291	0.680046	0.636788	0.598679	0.650954	0.460201	0.585645	0.5078	0.603647	0.516768	0.573233
-142.373	0.364868	0.461236	0.111912	0.296197	0.417986	0.579025	0.424585	0.280955	0.3148		0.461313	0.649519	0.486723	0.516393	0.782992	0.624822	0.648668	0.639273	0.488946	0.607137	0.623068	0.539525	0.573666	0.508073	0.456052	0.595218	0.727706	0.394245	0.323217	0.427382	0.491152	0.48738	0.515722	0.461449	0.420515	0.40664	0.614147	0.501561	0.683338	0.690073	0.684728	0.594484	0.634287	0.497163	0.487331	0.447801	0.5297	0.452472	0.504109
-137.288	0.379535	0.466205	0.129291	0.299525	0.432976	0.600931	0.440452	0.347656	0.317803		0.417728	0.606567	0.398592	0.483211	0.845644	0.625908	0.474381	0.575304	0.425553	0.629294	0.596582	0.554926	0.604075	0.483653	0.401739	0.66104	0.570193	0.417504	0.356416	0.545632	0.455753	0.493643	0.433401	0.470254	0.476794	0.476497	0.582098	0.479777	0.750305	0.78524	0.695234	0.629107	0.568053	0.486247	0.614572	0.461001	0.537211	0.443581	0.543793
-132.203	0.389768	0.540557	0.154248	0.267471	0.408779	0.612311	0.42238	0.278788	0.326596		0.42553	0.623106	0.455351	0.496327	0.913138	0.664251	0.58354	0.79217	0.475116	0.636612	0.432836	0.525414	0.555482	0.647439	0.467734	0.443258	0.71079	0.461242	0.291091	0.52028	0.423191	0.515629	0.413689	0.466506	0.542457	0.532499	0.543926	0.510007	0.727199	0.833468	0.785981	0.70151	0.607323	0.51913	0.591139	0.444513	0.461675	0.417366	0.55372
-127.119	0.38786	0.537153	0.143552	0.294842	0.443029	0.653793	0.392907	0.26198	0.399854		0.388954	0.648017	0.46525	0.469959	0.702548	0.665043	0.697814	0.47083	0.477894	0.564872	0.512192	0.509737	0.679426	0.624385	0.421369	0.485014	0.668582	0.474582	0.309869	0.509466	0.420558	0.527708	0.513483	0.406571	0.475691	0.468814	0.695843	0.418601	0.63388	0.826205	0.725961	0.630437	0.577104	0.481699	0.591887	0.499917	0.461527	0.411268	0.612264
-122.034	0.403194	0.525853	0.134835	0.269662	0.434489	0.624486	0.387331	0.386341	0.293579		0.33264	0.648232	0.486935	0.448959	0.646627	0.715549	0.661291	0.500852	0.519651	0.536166	0.626382	0.606983	0.588537	0.540365	0.38248	0.467463	0.587042	0.402593	0.363034	0.454626	0.410733	0.512497	0.523717	0.387558	0.415718	0.374941	0.651845	0.550744	0.638414	0.780723	0.737401	0.72262	0.669394	0.487879	0.630125	0.415152	0.629636	0.455739	0.594992
-116.949	0.412313	0.520675	0.171401	0.288159	0.438484	0.653881	0.433304	0.290898	0.344854		0.350173	0.644001	0.472017	0.512227	0.767894	0.504527	0.488334	0.583342	0.745596	0.54639	0.564172	0.524493	0.525927	0.498568	0.368965	0.495708	0.637708	0.44756	0.313819	0.577065	0.427788	0.525048	0.519709	0.437813	0.523252	0.495869	0.641851	0.54201	0.540574	0.663077	0.733057	0.728431	0.614262	0.513512	0.620743	0.376673	0.666944	0.408874	0.562852
-111.864	0.410809	0.528433	0.177294	0.263163	0.421594	0.691218	0.401712	0.403817	0.458802		0.383722	0.608539	0.496255	0.488761	0.565425	0.521665	0.59923	0.58217	0.38587	0.465276	0.472524	0.486199	0.550458	0.551864	0.345143	0.511557	0.630283	0.439238	0.278204	0.545902	0.363475	0.491519	0.481337	0.45728	0.498754	0.464421	0.645748	0.580497	0.588348	0.618275	0.655135	0.626079	0.612645	0.472886	0.497306	0.355749	0.631315	0.390226	0.511197
-106.78	0.411677	0.53098	0.208057	0.290931	0.463585	0.654126	0.429954	0.285379	0.383079		0.385583	0.589123	0.548423	0.481477	0.69929	0.633014	0.707942	0.704692	0.495323	0.721998	0.461257	0.470952	0.481249	0.551466	0.369244	0.528051	0.531657	0.393919	0.346974	0.470343	0.478255	0.512405	0.473957	0.429727	0.500704	0.501787	0.648955	0.62782	0.540809	0.626321	0.612527	0.642925	0.56175	0.403148	0.592777	0.325629	0.649139	0.375386	0.535886
-101.695	0.438111	0.542188	0.211669	0.277436	0.429346	0.655587	0.436676	0.440936	0.389474		0.381321	0.548891	0.449807	0.466161	0.657747	0.800412	0.645155	0.618843	0.508096	0.631254	0.425493	0.458895	0.554029	0.480001	0.376969	0.538482	0.582045	0.398676	0.293801	0.527271	0.450279	0.511841	0.488261	0.392706	0.498072	0.492145	0.733444	0.572673	0.479531	0.67946	0.578737	0.570621	0.498918	0.412441	0.456481	0.253316	0.588745	0.462406	0.545657
-96.6102	0.42161	0.52364	0.218855	0.292334	0.447749	0.649693	0.405741	0.38602	0.335771		0.334807	0.542702	0.496938	0.397767	0.808221	0.738149	0.712044	0.697287	0.633327	0.549038	0.385547	0.460616	0.536396	0.582588	0.428631	0.489702	0.571319	0.35262	0.30246	0.501845	0.413604	0.461768	0.490919	0.434282	0.413696	0.388442	0.567946	0.54634	0.688289	0.606023	0.451062	0.615444	0.55055	0.443217	0.517454	0.270129	0.514533	0.344271	0.415203
-91.5254	0.411504	0.525945	0.265669	0.284297	0.458554	0.638878	0.415402	0.33456	0.409607		0.348488	0.561133	0.450108	0.505753	0.48505	0.645667	0.624521	0.524805	0.418836	0.470428	0.577192	0.472793	0.613304	0.622951	0.448908	0.618935	0.533429	0.385224	0.315072	0.53368	0.347919	0.477752	0.372265	0.414641	0.476545	0.437992	0.718282	0.562965	0.546277	0.525095	0.614717	0.627063	0.492446	0.40927	0.531615	0.302663	0.559422	0.481556	0.525591
-86.4407	0.391436	0.56418	0.292297	0.28497	0.456763	0.629052	0.438895	0.438891	0.335715		0.361793	0.583086	0.437313	0.506831	0.613032	0.757555	0.676764	0.727441	0.357522	0.399315	0.562989	0.482724	0.477971	0.453845	0.405885	0.523056	0.651859	0.391302	0.302376	0.477305	0.472505	0.430161	0.383147	0.4415	0.424186	0.410878	0.641075	0.543805	0.593149	0.618241	0.550646	0.67445	0.547606	0.381021	0.494067	0.28402	0.542166	0.361373	0.664942
-81.3559	0.44142	0.572695	0.259069	0.287909	0.450024	0.626492	0.444298	0.439899	0.410271		0.364886	0.545881	0.42137	0.493043	0.597944	0.687795	0.566335	0.502501	0.475679	0.537132	0.596156	0.458392	0.550878	0.504905	0.446341	0.55087	0.599664	0.296579	0.35487	0.492161	0.441363	0.440134	0.438998	0.427999	0.369931	0.355596	0.706503	0.602482	0.652843	0.735056	0.664377	0.526892	0.544738	0.505901	0.498524	0.287091	0.497988	0.367132	0.515643
-76.2712	0.41609	0.557256	0.370854	0.282046	0.460194	0.625277	0.417006	0.337042	0.293009		0.368115	0.56088	0.459531	0.559787	0.641953	0.766549	0.606245	0.637995	0.482985	0.426334	0.611917	0.49203	0.590037	0.597404	0.444395	0.554602	0.583971	0.302176	0.323304	0.475444	0.428401	0.459444	0.461811	0.457715	0.388981	0.3954	0.648328	0.554494	0.658912	0.678739	0.691529	0.737265	0.526231	0.507578	0.593554	0.379388	0.545404	0.436405	0.638992
-71.1864	0.44124	0.574267	0.350986	0.30176	0.442158	0.590198	0.392427	0.420496	0.338274		0.39485	0.584251	0.378313	0.517431	0.747462	0.657445	0.704141	0.679458	0.466214	0.609043	0.383024	0.487558	0.572789	0.638469	0.442155	0.658522	0.568541	0.305226	0.290774	0.558701	0.494028	0.472451	0.406151	0.402918	0.471001	0.465656	0.622394	0.568403	0.590481	0.703668	0.693269	0.550222	0.621385	0.443159	0.437195	0.30842	0.593534	0.356927	0.541836
-66.1017	0.429229	0.57594	0.451222	0.292989	0.447378	0.583299	0.405738	0.508793	0.468562		0.336212	0.593843	0.475863	0.51467	0.577909	0.816042	0.697583	0.635447	0.651305	0.365291	0.484929	0.491918	0.766923	0.618282	0.306002	0.569101	0.571236	0.377106	0.313442	0.445879	0.451383	0.394306	0.373771	0.389868	0.492177	0.476202	0.654462	0.534104	0.608159	0.616899	0.705506	0.555059	0.586474	0.450622	0.597437	0.255953	0.530898	0.471222	0.552797
-61.0169	0.443827	0.552217	0.466389	0.28265	0.448957	0.594156	0.412678	0.469691	0.567001		0.386033	0.651595	0.464123	0.441204	0.612314	0.539691	0.72402	0.744184	0.759189	0.633795	0.583287	0.451224	0.462836	0.498101	0.42908	0.534955	0.634886	0.355037	0.370284	0.42043	0.385171	0.427943	0.395627	0.374057	0.420669	0.430967	0.753106	0.560037	0.640422	0.637826	0.647229	0.559629	0.590749	0.391753	0.57966	0.344159	0.538263	0.393673	0.63096
-55.9322	0.452892	0.548483	0.509711	0.284992	0.439864	0.583301	0.434959	0.546405	0.511164		0.358946	0.627846	0.445004	0.390812	0.588453	0.793367	0.638675	0.694688	0.692274	0.389791	0.590393	0.550226	0.416179	0.646444	0.399856	0.591036	0.615627	0.345849	0.358123	0.477949	0.390734	0.480401	0.379721	0.40951	0.369933	0.369224	0.684389	0.633051	0.547158	0.604787	0.615977	0.566898	0.651587	0.439	0.59123	0.270963	0.575097	0.327955	0.597357
-50.8475	0.455459	0.532793	0.568971	0.272234	0.448887	0.590885	0.388796	0.613566	0.603563		0.399884	0.619137	0.516839	0.428885	0.633571	0.659339	0.865149	0.490424	0.465368	0.479865	0.480222	0.516266	0.565443	0.619576	0.402856	0.471031	0.599324	0.385772	0.373193	0.509687	0.450741	0.443656	0.346836	0.439869	0.399637	0.411039	0.706338	0.486146	0.517825	0.587201	0.568924	0.535587	0.542599	0.564344	0.604073	0.307971	0.606901	0.449914	0.569087
-45.7627	0.42894	0.536764	0.592404	0.283422	0.463102	0.585733	0.420025	0.680754	0.64434		0.377538	0.577957	0.417701	0.545622	0.709371	0.691883	0.703049	0.722376	0.512161	0.453537	0.468874	0.498553	0.57725	0.675726	0.382198	0.410625	0.553489	0.364192	0.339788	0.424292	0.553312	0.361194	0.330741	0.419352	0.436259	0.422972	0.760728	0.532039	0.52479	0.640967	0.62602	0.601197	0.547882	0.453074	0.716198	0.313143	0.473775	0.384417	0.476261
-40.678	0.469759	0.544799	0.600844	0.2673	0.466175	0.547434	0.4149	0.652031	0.653381		0.340701	0.628564	0.414515	0.46985	0.761842	0.855906	0.59577	0.593544	0.593131	0.597469	0.609773	0.518525	0.468543	0.449549	0.38468	0.492927	0.537771	0.344023	0.296625	0.467288	0.444176	0.365125	0.340551	0.398616	0.373138	0.36029	0.742348	0.495334	0.567753	0.627045	0.646292	0.544672	0.532822	0.536262	0.590095	0.197143	0.54388	0.438887	0.460314
-35.5932	0.467667	0.543484	0.595569	0.277479	0.444394	0.56801	0.398358	0.664746	0.631403		0.387959	0.61988	0.448871	0.506177	0.656764	0.653722	0.670858	0.589398	0.543276	0.671546	0.624001	0.501416	0.446099	0.539307	0.358094	0.464816	0.504234	0.338044	0.33439	0.486991	0.402983	0.300176	0.368626	0.364034	0.401768	0.382204	0.77441	0.505389	0.602874	0.608394	0.665826	0.553486	0.491269	0.469417	0.538873	0.252598	0.554992	0.387065	0.462508
-30.5085	0.483379	0.563927	0.638872	0.278309	0.437767	0.551086	0.396959	0.80759	0.59924		0.396273	0.564618	0.387675	0.464099	0.643221	0.574357	0.801737	0.686137	0.503752	0.463698	0.435021	0.461194	0.455456	0.653932	0.3627	0.466954	0.504838	0.320756	0.307	0.480993	0.339313	0.335131	0.357023	0.310704	0.428287	0.421856	0.763683	0.576669	0.535079	0.614354	0.578805	0.594058	0.553807	0.497532	0.545077	0.33112	0.534715	0.415554	0.511696
-25.4237	0.500788	0.565172	0.705545	0.312019	0.464996	0.564243	0.416995	0.810276	0.744303		0.359525	0.526345	0.464005	0.605477	0.639468	0.656632	0.617301	0.47277	0.592921	0.542324	0.345923	0.43929	0.308292	0.508802	0.38254	0.49109	0.46292	0.398668	0.345556	0.45305	0.331711	0.325692	0.294779	0.367904	0.379823	0.366583	0.787583	0.489795	0.559015	0.593296	0.586735	0.565603	0.581895	0.474054	0.506081	0.353759	0.512004	0.386212	0.496882
-20.339	0.543262	0.550896	0.734452	0.3266	0.427716	0.576873	0.40641	0.789395	0.69808		0.376341	0.508347	0.56219	0.588064	0.578547	0.764996	0.581573	0.649014	0.557882	0.460496	0.300116	0.425475	0.428591	0.575413	0.43348	0.371007	0.501456	0.415445	0.330616	0.488416	0.418101	0.373906	0.374963	0.357852	0.396067	0.384557	0.716034	0.54961	0.565248	0.613072	0.650253	0.539073	0.519138	0.485948	0.554669	0.31607	0.562514	0.431489	0.520427
-15.2542	0.591737	0.550394	0.839939	0.322376	0.438044	0.540564	0.424766	0.777873	0.781997		0.359513	0.454757	0.532228	0.513919	0.504939	0.663833	0.575185	0.549573	0.644369	0.505867	0.418812	0.402537	0.384713	0.583153	0.464875	0.423066	0.445806	0.409119	0.283551	0.507976	0.482506	0.384784	0.340235	0.437355	0.35973	0.358368	0.759537	0.530955	0.549962	0.625221	0.5918	0.574932	0.50434	0.471772	0.595893	0.282877	0.472235	0.408413	0.472156
-10.1695	0.609283	0.577881	0.850769	0.334479	0.469886	0.511019	0.41596	0.780659	0.719731		0.379027	0.448307	0.408449	0.5112	0.498042	0.606303	0.48568	0.542362	0.587626	0.600784	0.373162	0.396021	0.464142	0.509357	0.483719	0.405497	0.420731	0.466301	0.326048	0.467366	0.442181	0.440019	0.34609	0.40033	0.447436	0.429272	0.726289	0.499639	0.491452	0.548991	0.606215	0.475895	0.548329	0.414801	0.555102	0.316984	0.500101	0.4003	0.412251
-5.08475	0.654724	0.61344	0.932953	0.376595	0.482212	0.514	0.374492	0.745455	0.556064		0.401833	0.381626	0.383939	0.590907	0.539017	0.529705	0.487654	0.582011	0.59948	0.574781	0.463136	0.383347	0.37722	0.565073	0.474545	0.346553	0.392398	0.467916	0.375839	0.44881	0.509523	0.536529	0.372729	0.479474	0.419683	0.400026	0.68217	0.456849	0.432913	0.485004	0.526614	0.488036	0.506498	0.444555	0.602267	0.244568	0.491771	0.413023	0.498731
0	0.53025	0.548845	0.649824	0.332319	0.46637	0.508632	0.409081	0.537046	0.707254		0.342267	0.28068	0.387664	0.55332	0.414674	0.491782	0.403272	0.441048	0.499944	0.517936	0.396014	0.371226	0.384744	0.430321	0.396396	0.314776	0.275055	0.45597	0.45014	0.436035	0.436311	0.504225	0.483842	0.437342	0.399816	0.387343	0.474757	0.306306	0.553639	0.504003	0.518826	0.426149	0.395253	0.368335	0.382645	0.534159	0.378623	0.372518	0.38647
[truncated: 48 more columns]

## Sheet: supp 1 b.iii
Supp 1 a. ii.	5cm position binned F
	VTA axons					LC axons
	slope	r-squared				slope	r-squared
roi 1	0.0656507	0.806202			roi 1	-0.016307	0.140245
roi 2	0.0691839	0.701608			roi 2	-0.0520347	0.559565
roi 3	0.213994	0.824306			roi 3	-0.0271008	0.262563
roi 4	0.0200874	0.541599			roi 4	-0.000375817	5.88187e-05
roi 5	0.0210439	0.675831			roi 5	-0.0342348	0.140769
roi 6	0.0394602	0.201156			roi 6	0.0176948	0.0440902
roi 7	-0.00793601	0.197967			roi 7	-0.0142002	0.027627
roi 8	0.165572	0.816026			roi 8	0.0121727	0.0204836
roi 9	0.116262	0.668989			roi 9	0.0243227	0.0796897
					roi 10	-0.00298638	0.00108526
					roi 11	-0.0500322	0.277142
					roi 12	-0.0277645	0.292107
					roi 13	-0.0436196	0.217061
					roi 14	0.00549882	0.0055811
					roi 15	-0.000323872	6.84931e-05
					roi 16	-0.0413483	0.257011
					roi 17	-0.0711514	0.680544
					roi 18	-0.0136858	0.0760052
					roi 19	0.0110067	0.137508
					roi 20	-0.00534236	0.0189305
					roi 21	-0.00208972	0.00186967
					roi 22	-0.0479544	0.491236
					roi 23	-0.0700283	0.76242
					roi 24	-0.0384319	0.557095
					roi 25	-0.00426024	0.00723854
					roi 26	-0.00135514	0.000728604
					roi 27	0.0511834	0.610304
					roi 28	0.00722331	0.0265671
					roi 29	-0.0209457	0.0965568
					roi 30	-0.0371603	0.285482
					roi 31	-0.0148403	0.0527665
					roi 32	-0.0167534	0.0634453
					roi 33	-0.0337846	0.339756
					roi 34	0.00797239	0.0304486
					roi 35	-0.00847084	0.0187572
					roi 36	-0.0149422	0.0356758
					roi 37	-0.00887978	0.0257514
					roi 38	-0.0125513	0.0808639
					roi 39	-0.0199472	0.121389
					roi 40	0.0133656	0.208098
					roi 41	0.0369992	0.69925
					roi 42	-0.0128699	0.231198
					roi 43	0.03535	0.161155
					roi 44	0.00985195	0.0635598
					roi 45	-0.01303	0.0788926
					roi 46	-0.00757892	0.0267181
					roi 47	-0.0472665	0.477659
					roi 48	-0.0480411	0.693178
					roi 49	-0.0420019	0.553845
					roi 50	-0.0453483	0.631169
					roi 51	-0.00367829	0.00790153
					roi 52	-0.0464022	0.777589
					roi 53	-0.0319334	0.428151
					roi 54	0.0330377	0.622341
					roi 55	0.00894668	0.0628649
					roi 56	-0.000407933	0.000226848
					roi 57	0.00120378	0.00173181
					roi 58	-0.0248143	0.504957
					roi 59	-0.0390917	0.542432
					roi 60	-0.0523443	0.674305
					roi 61	0.0103787	0.116935
					roi 62	-0.0615255	0.880215
					roi 63	0.0127374	0.0814721
					roi 64	0.0171314	0.214344
					roi 65	0.0224508	0.225394
					roi 66	-0.000354927	8.36173e-05
					roi 67	-0.0156123	0.151791
					roi 68	-0.0221694	0.26106
					roi 69	-0.0123906	0.10199
					roi 70	-0.0255064	0.360557
					roi 71	-0.0336168	0.458733
					roi 72	-0.04206	0.578624
					roi 73	-0.0158099	0.133613
					roi 74	-0.00240418	0.00699672
					roi 75	0.00831739	0.0961817
					roi 76	0.0167501	0.154932
					roi 77	0.0284514	0.337396
					roi 78	0.0255029	0.450275
					roi 79	0.0234432	0.31491
					roi 80	0.024399	0.503715
					roi 81	0.0264304	0.528819
					roi 82	0.0541995	0.79849
					roi 83	0.0168937	0.342402
					roi 84	0.0233077	0.411449
					roi 85	0.0222057	0.431101
					roi 86	0.00980079	0.191702
					roi 87	0.0427263	0.871941
