# Supplementary material for: Distinct catecholaminergic pathways projecting to hippocampal CA1 transmit contrasting signals during navigation in familiar and novel environments
Source: eLife. 2024 Nov 6;13:RP95213. doi: 10.7554/eLife.95213 (PMC11540301; doi:10.7554/eLife.95213)
Supplement: Figure 1—figure supplement 2—source data 1. [file elife-95213-fig1-figsupp2-data1.xlsx]

## Sheet: supp 2a
Supp 2a
	VTA GCaMP6s axons						VTA GCaMP7b
bin	roi 1	roi 2	roi 3	roi 4	roi 5		roi 1	roi 2	roi 3	roi 4
1	0.297132	0.451742	0.428246	0.440875	0.444129		0.357404	0.22932	0.24796	0.403363
2	0.249466	0.268592	0.388652	0.390168	0.419237		0.336155	0.24099	0.250907	0.363101
3	0.246995	0.283662	0.374077	0.416204	0.422026		0.344652	0.246574	0.244136	0.35657
4	0.229151	0.306382	0.390524	0.343809	0.441984		0.35006	0.294597	0.234744	0.385867
5	0.190725	0.300557	0.384215	0.348719	0.426981		0.332776	0.307126	0.25376	0.397902
6	0.17882	0.24087	0.313518	0.394514	0.43914		0.333902	0.313613	0.248613	0.407282
7	0.120731	0.209936	0.282784	0.449456	0.467685		0.333674	0.298467	0.249547	0.394526
8	0.19089	0.337846	0.255662	0.367736	0.434074		0.345385	0.336114	0.228151	0.417398
9	0.139432	0.341237	0.361188	0.411536	0.453655		0.337534	0.338371	0.249283	0.425791
10	0.142838	0.222548	0.301944	0.403763	0.410838		0.339518	0.379038	0.240682	0.388478
11	0.133553	0.282783	0.331606	0.485584	0.413559		0.350328	0.350579	0.25224	0.42823
12	0.141789	0.296159	0.329706	0.416872	0.437869		0.366482	0.375778	0.250173	0.414195
13	0.162808	0.242365	0.371501	0.530123	0.409254		0.327927	0.399546	0.255388	0.384721
14	0.12167	0.246688	0.360836	0.456347	0.402919		0.343996	0.429078	0.267924	0.466871
15	0.139847	0.25284	0.337867	0.54389	0.422792		0.358406	0.441191	0.2704	0.408841
16	0.122752	0.295728	0.371439	0.481126	0.419102		0.347474	0.474247	0.283251	0.407802
17	0.116939	0.320223	0.280556	0.567537	0.422601		0.355049	0.465347	0.330231	0.379233
18	0.112678	0.275488	0.370691	0.600575	0.4244		0.363155	0.461786	0.281806	0.441105
19	0.115024	0.329633	0.322784	0.627329	0.431495		0.371392	0.458893	0.308368	0.438969
20	0.121087	0.355839	0.349243	0.504506	0.446358		0.386822	0.497538	0.289054	0.452915
21	0.157435	0.24071	0.286216	0.604431	0.414884		0.367537	0.544356	0.266316	0.392082
22	0.1311	0.232913	0.43494	0.747792	0.394548		0.38095	0.534616	0.30314	0.45601
23	0.14755	0.311034	0.205784	0.638521	0.380917		0.397369	0.521766	0.283857	0.450284
24	0.153561	0.440151	0.346833	0.644705	0.401441		0.397633	0.533713	0.282254	0.450975
25	0.181407	0.312106	0.331816	0.791571	0.432891		0.417195	0.534715	0.299915	0.454622
26	0.183097	0.281759	0.453854	0.664108	0.412763		0.395188	0.509165	0.26917	0.43227
27	0.165298	0.417614	0.444106	0.524382	0.409611		0.402036	0.525681	0.266533	0.428245
28	0.211958	0.311173	0.36106	0.659048	0.428739		0.405989	0.514495	0.295101	0.444896
29	0.184806	0.374527	0.439577	0.720465	0.421122		0.399822	0.523451	0.311673	0.446279
30	0.218424	0.480308	0.340199	0.645746	0.439734		0.431477	0.551344	0.274134	0.462891
31	0.199967	0.342377	0.306885	0.715599	0.414968		0.40037	0.528622	0.285904	0.451782
32	0.245111	0.416434	0.356389	0.668979	0.379165		0.408749	0.502432	0.33456	0.461556
33	0.271373	0.399445	0.47613	0.63822	0.433809		0.409323	0.528017	0.278939	0.459003
34	0.28699	0.472239	0.343557	0.611226	0.44904		0.380206	0.555191	0.296534	0.484132
35	0.269341	0.470323	0.429139	0.623952	0.436672		0.421139	0.563486	0.293029	0.423969
36	0.228693	0.448429	0.378678	0.616063	0.443222		0.436477	0.545223	0.282747	0.469552
37	0.34973	0.295771	0.340745	0.461661	0.419311		0.412139	0.616916	0.305566	0.464673
38	0.436398	0.454154	0.302978	0.684222	0.385028		0.430884	0.531797	0.319075	0.451411
39	0.365934	0.447331	0.358897	0.643214	0.403385		0.430091	0.573936	0.266955	0.477553
40	0.425305	0.529867	0.47562	0.578181	0.404583		0.426744	0.538303	0.308387	0.448981
41	0.474686	0.412165	0.490497	0.712878	0.407933		0.412689	0.55158	0.308615	0.487978
42	0.472945	0.501358	0.583092	0.607604	0.412343		0.462425	0.548631	0.287489	0.431216
43	0.487134	0.542503	0.509519	0.624694	0.448749		0.438302	0.568224	0.290178	0.463483
44	0.525156	0.498693	0.598843	0.600058	0.403877		0.461986	0.533139	0.2879	0.429494
45	0.616823	0.63329	0.637048	0.601352	0.387255		0.443079	0.496943	0.271926	0.465079
46	0.585498	0.743472	0.650231	0.632911	0.408905		0.431576	0.545736	0.279414	0.468884
47	0.585565	0.570239	0.607722	0.629853	0.435375		0.471448	0.516056	0.293408	0.4592
48	0.62696	0.658734	0.671107	0.598143	0.411281		0.474399	0.554731	0.281117	0.471474
49	0.571845	0.654064	0.630163	0.586367	0.40947		0.461105	0.541875	0.264974	0.454218
50	0.612823	0.756968	0.605383	0.593153	0.400122		0.509551	0.548369	0.283668	0.469072
51	0.653381	0.824191	0.561037	0.559042	0.389669		0.468769	0.573884	0.280663	0.438357
52	0.702129	0.824881	0.724103	0.530314	0.415962		0.46687	0.570408	0.317923	0.471493
53	0.715442	0.796844	0.736797	0.515329	0.426129		0.520523	0.555629	0.308257	0.458248
54	0.741451	0.778793	0.681097	0.589383	0.39947		0.546524	0.554872	0.332599	0.444452
55	0.820216	0.802288	0.756316	0.538261	0.433798		0.578547	0.540229	0.313039	0.439624
56	0.885653	0.808109	0.815082	0.553606	0.403542		0.605616	0.560212	0.339794	0.495194
57	0.850598	0.732148	0.686148	0.50775	0.412917		0.610935	0.584784	0.337577	0.468906
58	0.907207	0.778046	0.573315	0.523643	0.366589		0.637313	0.620832	0.360954	0.481967
59	0.938662	0.670569	0.633552	0.523932	0.405219		0.676746	0.590264	0.385524	0.466979
60	0.63109	0.523153	0.712476	0.509616	0.409749		0.519672	0.547192	0.329229	0.465793

## Sheet: supp 2b
Supp 2b	velocity binned F
	VTA GCaMP6s axons						VTA GCaMP7b
bin	roi 1	roi 2	roi 3	roi 4	roi 5		roi 1	roi 2	roi 3	roi 4
1	0.503409	0.487267	0.488502	0.473908	0.421346		0.449027	0.270766	0.292712	0.427625
2	0.472439	0.477755	0.521583	0.458476	0.413991		0.410596	0.298321	0.313508	0.43096
3	0.432566	0.488942	0.511272	0.435357	0.429141		0.442236	0.312948	0.341038	0.447305
4	0.351947	0.499792	0.539575	0.390751	0.459531		0.433843	0.336987	0.29559	0.430617
5	0.247211	0.443431	0.45712	0.375627	0.421506		0.437018	0.303804	0.280264	0.420756
6	0.579244	0.446364	0.588044	0.449986	0.44856		0.466157	0.436975	0.27441	0.421848
7	0.41618	0.505182	0.604402	0.361301	0.443056		0.53515	0.365692	0.281126	0.505842
8	0.535227	0.462622	0.665892	0.597126	0.406641		0.396651	0.443974	0.260207	0.499142
9	0.58534	0.459673	0.559768	0.561689	0.435273		0.439483	0.394996	0.308323	0.462361
10	0.665613	0.566249	0.572447	0.359762	0.445114		0.401172	0.443565	0.338592	0.436835
11	0.687681	0.532727	0.536479	0.316399	0.397156		0.393983	0.4309	0.336494	0.499916
12	0.722367	0.467024	0.576682	0.446177	0.41082		0.344999	0.467074	0.298976	0.505855
13	0.647151	0.413016	0.447865	0.422473	0.409811		0.329034	0.443638	0.30581	0.481542
14	0.654044	0.344736	0.422166	0.480298	0.424632		0.321147	0.542811	0.366717	0.439229
15	0.586551	0.446701	0.460041	0.599945	0.415578		0.308632	0.453956	0.31865	0.542015
16	0.363142	0.467592	0.473217	0.644606	0.419043		0.400271	0.522773	0.384457	0.49749
17	0.521068	0.440046	0.401062	0.502967	0.418151		0.384468	0.468698	0.362056	0.484756
18	0.426581	0.367509	0.467786	0.564872	0.418676		0.30603	0.476616	0.341229	0.412889
19	0.481082	0.456205	0.460034	0.604614	0.417634		0.385617	0.473259	0.302041	0.474673
20	0.412597	0.409062	0.431116	0.602662	0.416658		0.451534	0.395519	0.325124	0.504817
21	0.460241	0.482291	0.532745	0.58671	0.423384		0.382356	0.488159	0.324325	0.489064
22	0.517278	0.481081	0.547924	0.593296	0.415198		0.406006	0.4372	0.358963	0.538235
23	0.443287	0.435408	0.562533	0.589129	0.423451		0.421968	0.465626	0.293829	0.479693
24	0.424626	0.650044	0.458137	0.506286	0.441392		0.429097	0.438535	0.288983	0.486638
25	0.375974	0.649919	0.515184	0.46181	0.45431		0.44679	0.499597	0.313433	0.485279
26	0.428999	0.38509	0.392942	0.501808	0.514628		0.397061	0.494121	0.313202	0.436176
27	0.299576	0.60785	0.564434	0.438593	0.462112		0.412064	0.485863	0.274609	0.485039
28	0.3505	0.583322	0.508819	0.406127	0.454463		0.417069	0.460256	0.280846	0.48382
29	0.267654	0.454413	0.529156	0.443916	0.484463		0.472753	0.532965	0.280714	0.514112
30	0.390769	0.460488	0.483988	0.320799	0.477097		0.459302	0.475505	0.321511	0.459397
31	0.368677	0.466532	0.396252	0.299611	0.515417		0.386758	0.519433	0.299607	0.41835
32	0.346861	0.393212	0.455724	0.423089	0.500728		0.449441	0.465388	0.333184	0.482306
33	0.404243	0.412437	0.38491	NaN	0.480845		0.475609	0.488646	0.289553	0.481738
34	0.205836	0.35321	0.393534	NaN	0.487065		0.499842	0.530413	0.28724	0.451952
35	0.27527	0.425084	0.344963	NaN	0.471623		0.403323	0.588008	0.27222	0.45392
36	0.395331	0.376817	0.316201	NaN	0.425773		0.449855	0.556792	0.267043	0.448278
37	0.268527	0.417112	0.399309	NaN	0.475183		0.505381	0.494803	0.278096	0.44019
38	0.20246	0.489874	0.240706	NaN	0.429641		0.475382	0.524522	0.264375	0.446716
39	0.233164	0.296355	0.384326	NaN	0.500039		0.475685	0.615461	0.274081	0.409513
40	0.319712	0.106028	0.261051	NaN	0.40472		0.487229	0.537909	0.267188	0.42829
41	0.285492	0.567689	0.2464	NaN	0.400831		0.435135	0.642264	0.24824	0.438303
42	0.154518	NaN	NaN	NaN	0.590953		0.552899	0.544078	0.256305	0.448814
43	0.272313	NaN	NaN	NaN	NaN		0.531247	0.556684	0.283962	0.394033
44	0.360472	NaN	NaN	NaN	0.282608		0.5014	0.762842	0.270291	0.428858
45	0.268128	NaN	NaN	NaN	NaN		0.535823	0.763134	0.249405	0.463259
46	0.458944	NaN	NaN	NaN	NaN		0.547424	0.663944	0.248774	0.42264
47	0.294966	NaN	NaN	0.933652	NaN		0.53988	0.763995	0.240733	0.43578
48	0.241926	NaN	NaN	NaN	NaN		0.559591	NaN	0.257014	0.419044
49	NaN	NaN	NaN	NaN	NaN		0.595639	NaN	0.231595	0.365274
50	0.203736	NaN	NaN	NaN	NaN		0.425216	NaN	0.244348	0.388317
51	0.250917	NaN	NaN	NaN	NaN		0.526321	NaN	0.258219	0.421723
52	NaN	NaN	NaN	1.10038	NaN		0.546206	NaN	0.232157	0.408638
53	NaN	NaN	NaN	NaN	NaN		0.577274	NaN	0.212942	0.401156
54	NaN	NaN	NaN	NaN	NaN		NaN	NaN	0.234317	0.420115
55	NaN	NaN	NaN	NaN	NaN		NaN	NaN	0.25431	0.383713
56	NaN	NaN	NaN	NaN	NaN		NaN	NaN	0.271341	0.355582
57	NaN	NaN	NaN	NaN	NaN		NaN	NaN	0.278031	0.323258
58	NaN	NaN	NaN	NaN	NaN		NaN	NaN	0.220769	0.402324
59	NaN	NaN	NaN	NaN	NaN		NaN	NaN	0.287648	0.37205
60	NaN	NaN	NaN	NaN	NaN		NaN	NaN	0.268575	0.319477

## Sheet: supp 2c
Supp 2c	motion initiation aligned F
	VTA GCaMP6s axons						VTA GCaMP7b
time from motion initiation	roi 1	roi 2	roi 3	roi 4	roi 5		roi 1	roi 2	roi 3	roi 4
-1.93611	1.01131	0.602845	0.458433	0.61842	0.362052		0.545146	0.287598	0.292575	0.391236
-1.8393	0.69047	0.491056	0.605323	0.748445	0.350921		0.530021	0.295615	0.239038	0.386734
-1.7425	0.638441	0.47618	0.473687	0.705221	0.350891		0.487597	0.264217	0.231318	0.359739
-1.64569	0.679878	0.594312	0.546637	0.654286	0.363846		0.485073	0.276864	0.260799	0.374981
-1.54889	0.70634	0.474408	0.409556	0.515711	0.359744		0.441803	0.2875	0.233351	0.379652
-1.45208	0.587699	0.419219	0.394567	0.411658	0.341262		0.41389	0.274547	0.225703	0.325715
-1.35528	0.612791	0.421163	0.508819	0.50452	0.347689		0.450529	0.296222	0.266298	0.365621
-1.25847	0.657066	0.575356	0.409225	0.554666	0.372962		0.442309	0.30449	0.239219	0.339222
-1.16167	0.595978	0.619158	0.521868	0.554277	0.36718		0.385593	0.281042	0.26217	0.359489
-1.06486	0.581637	0.28464	0.387818	0.582415	0.310741		0.384586	0.257971	0.229452	0.345896
-0.968054	0.583322	0.359789	0.374401	0.493302	0.256429		0.370843	0.268073	0.244414	0.290706
-0.871249	0.487708	0.433003	0.462319	0.608103	0.250292		0.348488	0.272878	0.228276	0.297566
-0.774443	0.584323	0.407305	0.315653	0.548351	0.308345		0.36464	0.269206	0.205376	0.324565
-0.677638	0.396351	0.348275	0.378404	0.494541	0.380264		0.349425	0.249243	0.238003	0.346598
-0.580833	0.41142	0.469733	0.201252	0.496499	0.351164		0.379282	0.258632	0.233066	0.329366
-0.484027	0.572494	0.325328	0.338605	0.556301	0.354971		0.334378	0.295559	0.204431	0.287249
-0.387222	0.459095	0.331413	0.362287	0.682258	0.395129		0.311507	0.287106	0.23419	0.307038
-0.290416	0.365488	0.304079	0.329393	0.583111	0.373381		0.309055	0.2869	0.201914	0.3088
-0.193611	0.373426	0.361788	0.29399	0.548362	0.326214		0.271787	0.272584	0.230307	0.298143
-0.0968054	0.321766	0.215258	0.46863	0.525093	0.336538		0.283172	0.302517	0.195313	0.302293
-2.22045e-16	0.428988	0.258886	0.280429	0.566549	0.344789		0.290951	0.29377	0.194052	0.301555
0.0968054	0.269255	0.308062	0.316149	0.533487	0.304331		0.259887	0.248922	0.208537	0.254933
0.193611	0.286885	0.329783	0.39881	0.448378	0.318589		0.239865	0.283611	0.192635	0.268711
0.290416	0.237881	0.283576	0.495963	0.423592	0.377741		0.277709	0.274318	0.228865	0.29551
0.387222	0.252149	0.126101	0.385277	0.422247	0.367847		0.314457	0.310267	0.199674	0.266761
0.484027	0.286008	0.439696	0.37783	0.384768	0.292037		0.29129	0.274121	0.182058	0.314529
0.580833	0.230432	0.215521	0.435984	0.416715	0.299511		0.312269	0.356545	0.193907	0.271348
0.677638	0.301824	0.315245	0.38334	0.428424	0.325094		0.317852	0.402287	0.240389	0.31393
0.774443	0.270682	0.227119	0.427392	0.318313	0.289765		0.348699	0.435704	0.207586	0.297024
0.871249	0.276216	0.354044	0.481696	0.301382	0.320073		0.385777	0.460586	0.196258	0.334026
0.968054	0.190504	0.289812	0.41092	0.285177	0.368047		0.366936	0.382179	0.220362	0.320653
1.06486	0.282337	0.337496	0.393595	0.432726	0.369391		0.347813	0.421022	0.182406	0.321458
1.16167	0.260899	0.269093	0.357787	0.455573	0.372382		0.390964	0.400382	0.209506	0.294684
1.25847	0.15791	0.312847	0.340414	0.350571	0.372116		0.337719	0.41605	0.239744	0.323062
1.35528	0.177754	0.261098	0.379469	0.346732	0.381006		0.337882	0.389848	0.236137	0.339735
1.45208	0.150039	0.151704	0.354361	0.590294	0.388664		0.379269	0.395633	0.238574	0.335681
1.54889	0.120247	0.211618	0.277475	0.568007	0.399488		0.370543	0.436023	0.212469	0.340425
1.64569	0.124329	0.345255	0.374373	0.58879	0.393176		0.397278	0.418226	0.237782	0.360038
1.7425	0.108227	0.272196	0.242894	0.591047	0.377887		0.379784	0.416267	0.238679	0.35117
1.8393	0.181015	0.257617	0.275502	0.621845	0.356424		0.367702	0.465587	0.239563	0.345311
1.93611	0.137564	0.255523	0.238706	0.640701	0.306363		0.354826	0.426991	0.243943	0.326552
2.03291	0.103411	0.362342	0.39879	0.769384	0.294646		0.417335	0.447234	0.239341	0.368611
2.12972	0.096081	0.289903	0.33752	0.655925	0.323982		0.403671	0.42508	0.256411	0.356159
2.22652	0.123102	0.208158	0.258462	0.613478	0.323815		0.450688	0.447838	0.24394	0.357233
2.32333	0.135581	0.20705	0.209467	0.884856	0.304442		0.429555	0.479579	0.246354	0.369058
2.42014	0.128625	0.265556	0.285538	0.675781	0.30607		0.433649	0.482716	0.244111	0.362199
2.51694	0.065711	0.319969	0.494982	0.714621	0.300474		0.414472	0.482357	0.217511	0.373506
2.61375	0.0859811	0.271837	0.292365	0.768168	0.303917		0.45363	0.470283	0.24941	0.391622
2.71055	0.143353	0.373139	0.394167	0.727442	0.314675		0.374912	0.476274	0.24907	0.412438
2.80736	0.0581351	0.261844	0.384223	0.666146	0.345308		0.407198	0.524885	0.245014	0.395904
2.90416	0.128582	0.272088	0.346292	0.662837	0.307373		0.402107	0.487681	0.272806	0.375524
3.00097	0.134319	0.125165	0.321135	0.81763	0.270673		0.412593	0.579904	0.255807	0.355697
3.09777	0.102463	0.229478	0.384913	0.568265	0.31117		0.406535	0.556284	0.273682	0.37549
3.19458	0.147668	0.242309	0.370698	0.653359	0.327505		0.417644	0.545292	0.234584	0.346775
3.29138	0.141244	0.257672	0.269285	0.648947	0.344861		0.410283	0.614441	0.238666	0.382873
3.38819	0.127847	0.32031	0.366743	0.676652	0.368639		0.419275	0.543687	0.245595	0.385828
3.485	0.071635	0.417578	0.400272	0.656936	0.273474		0.426877	0.584152	0.24762	0.359012
3.5818	0.172836	0.280899	0.366808	0.703456	0.249111		0.425834	0.525175	0.240106	0.34094
3.67861	0.124788	0.31738	0.367555	0.688119	0.300526		0.432033	0.534406	0.241725	0.38305
3.77541	0.120372	0.337414	0.340901	0.642021	0.318852		0.424709	0.52754	0.246186	0.350002
3.87222	0.182237	0.235693	0.349519	0.789744	0.32958		0.433846	0.499656	0.282275	0.400327
3.96902	0.13317	0.241831	0.317047	0.796738	0.293492		0.419303	0.512133	0.261466	0.418217
4.06583	0.144637	0.363445	0.346851	0.571678	0.295053		0.439495	0.535274	0.27618	0.383436
4.16263	0.133104	0.217486	0.53023	0.718652	0.311813		0.439481	0.529912	0.24895	0.411175
4.25944	0.187904	0.204502	0.285216	0.698224	0.342514		0.453602	0.532483	0.268414	0.391737
4.35624	0.16224	0.37864	0.291951	0.732848	0.362872		0.422865	0.439586	0.299874	0.391544
4.45305	0.216451	0.426149	0.388535	0.751302	0.344608		0.44774	0.4622	0.272074	0.389655
4.54985	0.166405	0.289361	0.262272	0.638206	0.317775		0.437421	0.488175	0.298821	0.415722
4.64666	0.287766	0.383985	0.32821	0.724042	0.294695		0.428718	0.47381	0.284185	0.419931
4.74347	0.28603	0.460922	0.118422	0.550936	0.305343		0.423889	0.4785	0.282558	0.394533
4.84027	0.24696	0.347145	0.459719	0.697157	0.287614		0.370086	0.460836	0.321484	0.38173
4.93708	0.262902	0.173555	0.222244	0.664394	0.263849		0.417223	0.460824	0.32193	0.422582
5.03388	0.344931	0.347705	0.326475	0.732306	0.259701		0.456334	0.467802	0.325919	0.400376
5.13069	0.399027	0.486749	0.317354	0.702679	0.274474		0.549473	0.516957	0.317172	0.371886
5.22749	0.435821	0.352295	0.46734	0.779333	0.289381		0.541565	0.494538	0.359509	0.407099
5.3243	0.479886	0.40928	0.415016	0.723916	0.300252		0.535254	0.491349	0.302773	0.371308
5.4211	0.535684	0.314477	0.41745	0.821486	0.345567		0.568389	0.510903	0.338292	0.367622
5.51791	0.54746	0.295566	0.37777	0.679878	0.342628		0.512615	0.451939	0.304922	0.363442
5.61471	0.647784	0.336249	0.390288	0.615339	0.297398		0.578209	0.444836	0.301678	0.398374
5.71152	0.606138	0.444203	0.270056	0.72503	0.332207		0.592749	0.479601	0.269021	0.368732
5.80833	0.540792	0.315747	0.273576	0.494566	0.360307		0.554131	0.439955	0.296245	0.371221
5.90513	0.738871	0.395739	0.319518	0.544354	0.328207		0.615427	0.485301	0.308097	0.362183
6.00194	0.63616	0.428123	0.337517	0.492314	0.333103		0.560203	0.468286	0.291461	0.351677
6.09874	0.689574	0.513012	0.322505	0.630145	0.347526		0.592578	0.492457	0.284953	0.337959
6.19555	0.659806	0.333487	0.426516	0.470343	0.354533		0.560223	0.503971	0.25003	0.347153
6.29235	0.738599	0.507923	0.460963	0.517376	0.366705		0.614138	0.550504	0.25954	0.348316
6.38916	0.540408	0.658111	0.473395	0.482365	0.346191		0.595096	0.55635	0.239073	0.337271
6.48596	0.598923	0.401601	0.578338	0.446425	0.346695		0.630353	0.596372	0.259918	0.3387
6.58277	0.59299	0.393126	0.779271	0.536614	0.361925		0.573971	0.61316	0.23809	0.3276
6.67957	0.784617	0.606294	0.608733	0.558906	0.326381		0.58421	0.5608	0.228259	0.322553
6.77638	0.758626	0.615689	0.479468	0.602077	0.326132		0.582195	0.574903	0.243334	0.344
6.87318	0.701115	0.573345	0.490129	0.470016	0.338601		0.59056	0.50723	0.259354	0.35296
6.96999	0.85238	0.618536	0.580754	0.539739	0.292617		0.605511	0.521979	0.221378	0.348775
7.0668	0.655357	0.716347	0.518206	0.399464	0.258308		0.56275	0.512456	0.246532	0.34643
7.1636	0.884249	0.588044	0.609806	0.49357	0.311806		0.572147	0.514385	0.221239	0.329209
7.26041	0.860773	0.680256	0.540986	0.566414	0.337659		0.532914	0.562925	0.214795	0.330569
7.35721	0.883484	0.50693	0.441357	0.506573	0.350918		0.539253	0.595074	0.236906	0.325867
7.45402	0.84666	0.669666	0.613609	0.431548	0.342758		0.510708	0.584854	0.213708	0.343646
7.55082	1.02909	0.5325	0.650135	0.568352	0.332109		0.530736	0.573408	0.229957	0.309707
7.64763	0.876103	0.662648	0.659034	0.520738	0.329461		0.541085	0.548575	0.216064	0.31537
7.74443	0.830617	0.660568	0.623135	0.542022	0.357035		0.508654	0.51456	0.205054	0.309788
7.84124	0.757791	0.941982	0.642633	0.550295	0.385378		0.536693	0.510884	0.218613	0.317354
7.93804	0.81242	0.699299	0.643314	0.460636	0.346505		0.556512	0.473937	0.216223	0.291881
8.03485	0.886329	0.82719	0.609252	0.508198	0.289943		0.53016	0.4967	0.213612	0.312421
8.13166	0.700522	0.698082	0.619399	0.336655	0.321365		0.481895	0.4861	0.229326	0.320465
