# Supplementary material for: Distinct catecholaminergic pathways projecting to hippocampal CA1 transmit contrasting signals during navigation in familiar and novel environments
Source: eLife. 2024 Nov 6;13:RP95213. doi: 10.7554/eLife.95213 (PMC11540301; doi:10.7554/eLife.95213)
Supplement: Figure 1—figure supplement 3—source data 1. [file elife-95213-fig1-figsupp3-data1.xlsx]

## Sheet: supp 3ai
Supp 3ai	Position binned F
	VTA GCaMP6s axons						LC GCaMP6s axons
bin	roi 1	roi 2	roi 3	roi 4	roi 5		roi 1	roi 2	roi 3	roi 4	roi 5	roi 6	roi 7	roi 8	roi 9	roi 10	roi 11	roi 12	roi 13	roi 14	roi 15	roi 16	roi 17	roi 18	roi 19	roi 20	roi 21	roi 22	roi 23	roi 24	roi 25	roi 26	roi 27	roi 28	roi 29	roi 30	roi 31	roi 32	roi 33	roi 34	roi 35	roi 36	roi 37	roi 38	roi 39	roi 40	roi 41	roi 42	roi 43
1	0.297132	0.451742	0.428246	0.440875	0.444129		0.328924	0.147835	0.297255	0.466711	0.404957	0.355473	0.369363	0.375821	0.372872	0.393775	0.393453	0.26422	0.359987	0.347678	0.368167	0.263891	0.18672	0.341496	0.380632	0.365306	0.422156	0.326106	0.383886	0.283182	0.40516	0.388628	0.285545	0.391038	0.358467	0.324716	0.347897	0.339252	0.362412	0.333252	0.357058	0.523987	0.391352	0.414496	0.393547	0.296375	0.231875	0.414007	0.31489
2	0.249466	0.268592	0.388652	0.390168	0.419237		0.368928	0.367221	0.372862	0.502373	0.608318	0.474457	0.457645	0.452421	0.481637	0.518875	0.519964	0.349788	0.435679	0.363223	0.441422	0.310237	0.336084	0.440055	0.401143	0.406797	0.416236	0.43236	0.349032	0.457857	0.550871	0.526993	0.386009	0.600252	0.566755	0.629066	0.597835	0.611159	0.590484	0.436947	0.540756	0.525317	0.684554	0.442342	0.566964	0.467057	0.561407	0.416185	0.267926
3	0.246995	0.283662	0.374077	0.416204	0.422026		0.392036	0.432095	0.395619	0.592223	0.570567	0.598684	0.564462	0.540879	0.562359	0.520826	0.489708	0.461335	0.469381	0.434042	0.482568	0.48967	0.422615	0.423117	0.391415	0.413774	0.40941	0.448698	0.34421	0.492525	0.458436	0.471867	0.389267	0.570808	0.608129	0.656787	0.667764	0.596315	0.56314	0.441439	0.55387	0.497469	0.664239	0.410094	0.527871	0.464239	0.544505	0.452049	0.354828
4	0.229151	0.306382	0.390524	0.343809	0.441984		0.387259	0.494181	0.431211	0.526343	0.637034	0.614043	0.451696	0.624484	0.575457	0.533967	0.591679	0.492911	0.669466	0.386034	0.481561	0.350775	0.489596	0.452562	0.354221	0.439754	0.487287	0.472399	0.33414	0.463684	0.478393	0.453752	0.406945	0.599543	0.652808	0.733464	0.672566	0.620425	0.639935	0.472028	0.501582	0.382312	0.649875	0.478263	0.627793	0.465093	0.567005	0.52035	0.451498
5	0.190725	0.300557	0.384215	0.348719	0.426981		0.40559	0.545891	0.477725	0.495608	0.589709	0.600283	0.564553	0.523989	0.676884	0.61061	0.457163	0.509404	0.565758	0.522014	0.431917	0.409645	0.448654	0.415803	0.326382	0.459515	0.378524	0.425684	0.321349	0.489564	0.531673	0.518682	0.415577	0.550008	0.617792	0.735887	0.696524	0.642189	0.623228	0.451393	0.619573	0.423955	0.599855	0.489858	0.547415	0.473928	0.580937	0.511128	0.450345
6	0.17882	0.24087	0.313518	0.394514	0.43914		0.399571	0.549193	0.44037	0.577198	0.616376	0.625381	0.539344	0.662676	0.669584	0.582346	0.472192	0.533	0.58727	0.475874	0.488667	0.501275	0.528524	0.363724	0.381772	0.488115	0.400529	0.441538	0.345892	0.49029	0.531466	0.535029	0.406203	0.592565	0.684891	0.834681	0.756834	0.664111	0.645612	0.459336	0.646328	0.312823	0.678801	0.414576	0.646708	0.483284	0.580224	0.512574	0.485984
7	0.120731	0.209936	0.282784	0.449456	0.467685		0.411286	0.566902	0.527951	0.532516	0.556807	0.645915	0.568613	0.509594	0.601257	0.487885	0.382178	0.521576	0.632894	0.47185	0.454098	0.509833	0.543544	0.375537	0.316074	0.493523	0.410576	0.561214	0.393231	0.461765	0.592458	0.570678	0.440544	0.638338	0.706594	0.804716	0.700566	0.58061	0.617272	0.442161	0.666175	0.282527	0.677092	0.480456	0.564724	0.49085	0.574357	0.507552	0.478744
8	0.19089	0.337846	0.255662	0.367736	0.434074		0.446765	0.546303	0.523307	0.449159	0.576947	0.647343	0.568473	0.705212	0.643342	0.448633	0.618683	0.496934	0.517309	0.426218	0.39313	0.536894	0.4843	0.341481	0.321363	0.463385	0.518251	0.548076	0.414881	0.500115	0.467292	0.454574	0.436511	0.576562	0.732647	0.836958	0.771274	0.623251	0.669929	0.418376	0.692221	0.367961	0.687189	0.538941	0.560304	0.489794	0.593446	0.507765	0.481282
9	0.139432	0.341237	0.361188	0.411536	0.453655		0.425393	0.602046	0.491131	0.488458	0.744485	0.474705	0.479901	0.490992	0.463156	0.449614	0.458539	0.503868	0.609014	0.482768	0.388344	0.367628	0.581171	0.296127	0.330962	0.483205	0.441612	0.525953	0.392742	0.486737	0.481372	0.443764	0.438091	0.585454	0.707902	0.846361	0.682007	0.647667	0.67023	0.41492	0.69806	0.420113	0.686083	0.463186	0.618743	0.484361	0.605023	0.535618	0.551146
10	0.142838	0.222548	0.301944	0.403763	0.410838		0.444611	0.608553	0.472685	0.500037	0.596165	0.679926	0.464238	0.460004	0.727011	0.498556	0.634532	0.512405	0.570959	0.492692	0.395068	0.409446	0.613855	0.346759	0.361534	0.454271	0.395035	0.575169	0.479181	0.491862	0.459223	0.451201	0.46655	0.638626	0.594838	0.722407	0.750889	0.606977	0.631701	0.486185	0.536343	0.275594	0.679699	0.495519	0.586142	0.501826	0.625701	0.521075	0.532111
11	0.133553	0.282783	0.331606	0.485584	0.413559		0.445641	0.566102	0.413824	0.550114	0.690895	0.551698	0.512408	0.54786	0.494518	0.441695	0.749012	0.520534	0.566396	0.613375	0.413962	0.400374	0.544592	0.370535	0.325815	0.549867	0.376494	0.535665	0.490868	0.547608	0.510027	0.483824	0.502686	0.637167	0.665252	0.790956	0.700303	0.568485	0.519711	0.377144	0.648473	0.382666	0.548667	0.472263	0.666506	0.528145	0.624606	0.514377	0.541003
12	0.141789	0.296159	0.329706	0.416872	0.437869		0.450422	0.569683	0.453018	0.553957	0.66891	0.56204	0.590531	0.655725	0.427637	0.475252	0.623687	0.550176	0.491811	0.554125	0.475906	0.523525	0.662932	0.293209	0.340691	0.500043	0.412936	0.609039	0.583929	0.591567	0.565626	0.56343	0.456912	0.617499	0.639845	0.717989	0.658531	0.624603	0.631194	0.429431	0.505497	0.406642	0.487293	0.47528	0.595358	0.528295	0.612011	0.543433	0.577817
13	0.162808	0.242365	0.371501	0.530123	0.409254		0.416189	0.56802	0.494702	0.507324	0.630337	0.615734	0.494483	0.49134	0.52117	0.593383	0.499673	0.52542	0.67628	0.543518	0.381826	0.424987	0.607174	0.354922	0.353233	0.4509	0.44462	0.560803	0.593395	0.568265	0.516827	0.519518	0.515825	0.615063	0.608525	0.753949	0.622391	0.616015	0.636204	0.383547	0.605668	0.356096	0.456566	0.39349	0.554609	0.470037	0.559666	0.5039	0.535458
14	0.12167	0.246688	0.360836	0.456347	0.402919		0.408377	0.583571	0.455369	0.443913	0.707166	0.580742	0.557004	0.679148	0.478207	0.564938	0.512084	0.469154	0.55586	0.46918	0.351874	0.415341	0.528881	0.375341	0.377021	0.449388	0.415419	0.529449	0.616843	0.551781	0.500941	0.487649	0.449704	0.593331	0.59324	0.699281	0.586698	0.571884	0.625213	0.283135	0.509052	0.232004	0.483357	0.422011	0.584222	0.475162	0.600969	0.506138	0.496379
15	0.139847	0.25284	0.337867	0.54389	0.422792		0.381286	0.549363	0.394198	0.433778	0.674466	0.575245	0.486619	0.491742	0.44872	0.471516	0.525956	0.479882	0.604541	0.386739	0.364893	0.414516	0.557747	0.335956	0.391449	0.374605	0.456252	0.526815	0.54201	0.502547	0.565464	0.54298	0.566856	0.630277	0.581862	0.733324	0.647679	0.563065	0.639941	0.404383	0.515381	0.439752	0.589066	0.375811	0.572297	0.555393	0.56311	0.495467	0.413828
16	0.122752	0.295728	0.371439	0.481126	0.419102		0.34335	0.506253	0.376443	0.509556	0.637557	0.622326	0.547543	0.602141	0.468748	0.595655	0.615905	0.456533	0.500843	0.515374	0.4258	0.463275	0.606071	0.35978	0.342075	0.56791	0.560504	0.576492	0.544418	0.506893	0.52696	0.526199	0.546462	0.552454	0.525932	0.71517	0.63035	0.59706	0.605541	0.363383	0.705477	0.373135	0.631487	0.429226	0.453846	0.472063	0.476161	0.474731	0.409914
17	0.116939	0.320223	0.280556	0.567537	0.422601		0.345703	0.503436	0.456101	0.53419	0.693802	0.588528	0.554063	0.574163	0.431231	0.398387	0.505104	0.4406	0.438423	0.494276	0.44095	0.467143	0.598523	0.328362	0.314248	0.427923	0.456574	0.559653	0.523295	0.469776	0.465309	0.4834	0.515537	0.548216	0.553917	0.615945	0.562167	0.583838	0.613952	0.385104	0.513358	0.435269	0.58458	0.444272	0.405325	0.464259	0.492764	0.454079	0.40734
18	0.112678	0.275488	0.370691	0.600575	0.4244		0.340286	0.53489	0.399522	0.471882	0.680758	0.639297	0.525532	0.491858	0.534282	0.595515	0.572551	0.448215	0.564613	0.524115	0.446204	0.549848	0.645011	0.281776	0.288706	0.591806	0.477279	0.52687	0.477032	0.406087	0.410797	0.403557	0.531853	0.528566	0.502051	0.679276	0.572071	0.646754	0.513005	0.354045	0.573628	0.337535	0.439634	0.433931	0.562087	0.457337	0.478714	0.427136	0.404222
19	0.115024	0.329633	0.322784	0.627329	0.431495		0.332396	0.600137	0.425076	0.509491	0.699413	0.605676	0.542326	0.597349	0.55532	0.45287	0.507714	0.432329	0.634999	0.534795	0.478384	0.641235	0.639689	0.317918	0.2818	0.505063	0.39897	0.520313	0.505819	0.404254	0.487517	0.460198	0.558887	0.536783	0.57134	0.689096	0.634935	0.576341	0.509148	0.418889	0.543083	0.382266	0.552315	0.427943	0.574174	0.491361	0.518764	0.467532	0.429693
20	0.121087	0.355839	0.349243	0.504506	0.446358		0.360569	0.648165	0.457335	0.51005	0.69578	0.638992	0.632248	0.61494	0.510344	0.563844	0.572317	0.498612	0.473505	0.565431	0.451667	0.506264	0.694375	0.334436	0.291077	0.412805	0.383348	0.505245	0.482225	0.464395	0.448393	0.438457	0.569106	0.542973	0.489049	0.587765	0.513576	0.612301	0.554117	0.362421	0.547249	0.288364	0.555572	0.444406	0.581745	0.476975	0.513692	0.438992	0.408451
21	0.157435	0.24071	0.286216	0.604431	0.414884		0.383202	0.668983	0.519384	0.465849	0.744492	0.666387	0.550539	0.511947	0.582404	0.541247	0.490004	0.474207	0.628676	0.610945	0.41973	0.519989	0.697999	0.325137	0.24294	0.421976	0.457145	0.55642	0.478818	0.465543	0.389742	0.383802	0.557433	0.533443	0.599604	0.555418	0.506153	0.555383	0.64042	0.330445	0.590413	0.289157	0.483326	0.424731	0.565983	0.45624	0.513775	0.460956	0.403795
22	0.1311	0.232913	0.43494	0.747792	0.394548		0.40552	0.692742	0.560185	0.494566	0.711352	0.604605	0.764214	0.539489	0.50069	0.514545	0.471037	0.526927	0.504491	0.515779	0.42259	0.636737	0.659923	0.380178	0.301137	0.484863	0.448998	0.51501	0.476175	0.55727	0.41379	0.407043	0.633453	0.529434	0.464455	0.629875	0.660043	0.617916	0.595376	0.469072	0.513704	0.277677	0.508857	0.409309	0.527367	0.493335	0.531155	0.423118	0.397938
23	0.14755	0.311034	0.205784	0.638521	0.380917		0.329711	0.708267	0.585253	0.548878	0.696437	0.692059	0.583331	0.744287	0.549896	0.539613	0.631446	0.485074	0.465372	0.537337	0.414205	0.534741	0.641552	0.40089	0.223947	0.461997	0.411724	0.474085	0.541505	0.530775	0.398263	0.376116	0.603906	0.520852	0.478554	0.667739	0.661811	0.605197	0.61648	0.374766	0.617519	0.142376	0.479975	0.402961	0.636977	0.45693	0.489587	0.443927	0.407
24	0.153561	0.440151	0.346833	0.644705	0.401441		0.444065	0.639734	0.555685	0.510225	0.710829	0.476772	0.685456	0.566271	0.501048	0.542757	0.646915	0.543969	0.548878	0.64306	0.441943	0.694338	0.629377	0.395856	0.320828	0.518052	0.382592	0.46171	0.495437	0.557741	0.360669	0.341899	0.595096	0.472666	0.579601	0.677797	0.669519	0.592563	0.591654	0.425823	0.485376	0.26691	0.554976	0.41489	0.58935	0.493464	0.513417	0.406997	0.415494
25	0.181407	0.312106	0.331816	0.791571	0.432891		0.369895	0.64396	0.589578	0.486378	0.634429	0.704581	0.800058	0.468317	0.452352	0.520953	0.442817	0.49591	0.602866	0.740835	0.447143	0.450445	0.661078	0.363242	0.315375	0.544697	0.410639	0.487025	0.558313	0.487613	0.320997	0.308009	0.614932	0.558023	0.58225	0.6701	0.55618	0.595046	0.734057	0.385042	0.628201	0.233058	0.549204	0.527317	0.513039	0.48771	0.561817	0.450487	0.420722
26	0.183097	0.281759	0.453854	0.664108	0.412763		0.451006	0.69739	0.498461	0.548226	0.576403	0.601251	0.610687	0.489744	0.480322	0.377379	0.649559	0.591964	0.734519	0.480733	0.357658	0.516565	0.702477	0.355528	0.307943	0.474317	0.467996	0.555242	0.556677	0.497373	0.349803	0.336713	0.603176	0.472276	0.629959	0.690587	0.684123	0.647591	0.673191	0.415472	0.599276	0.237438	0.658807	0.50663	0.584185	0.522219	0.530461	0.426834	0.405352
27	0.165298	0.417614	0.444106	0.524382	0.409611		0.399114	0.604678	0.544537	0.511462	0.669668	0.671823	0.671874	0.566869	0.599612	0.524413	0.699558	0.554282	0.441862	0.505499	0.427393	0.531081	0.72687	0.441974	0.300719	0.427828	0.401673	0.595084	0.507537	0.488249	0.428342	0.426084	0.614115	0.50103	0.568485	0.661485	0.549389	0.527589	0.721533	0.437797	0.705561	0.304506	0.508378	0.393903	0.523282	0.437909	0.50501	0.448303	0.40878
28	0.211958	0.311173	0.36106	0.659048	0.428739		0.444752	0.720404	0.485511	0.568329	0.615878	0.621941	0.643411	0.502814	0.558802	0.363416	0.553911	0.384235	0.547264	0.556717	0.463618	0.472723	0.682432	0.444189	0.291691	0.451695	0.463982	0.579083	0.601265	0.519503	0.443977	0.435119	0.594056	0.474881	0.521619	0.649814	0.573886	0.405507	0.528203	0.43128	0.69117	0.329168	0.447002	0.367509	0.472253	0.434026	0.531759	0.430234	0.434675
29	0.184806	0.374527	0.439577	0.720465	0.421122		0.522475	0.650325	0.531798	0.60656	0.600991	0.634585	0.725948	0.550986	0.514709	0.529709	0.596711	0.568968	0.667479	0.420196	0.393856	0.714766	0.706986	0.433105	0.331332	0.446845	0.504886	0.52516	0.615338	0.504079	0.482675	0.463535	0.620865	0.535785	0.556619	0.64592	0.624946	0.597202	0.582671	0.55052	0.568957	0.338644	0.620385	0.417011	0.507615	0.459122	0.500111	0.460127	0.469353
30	0.218424	0.480308	0.340199	0.645746	0.439734		0.347941	0.703218	0.468631	0.520078	0.695539	0.600147	0.73963	0.587527	0.552556	0.747493	0.58533	0.509432	0.424268	0.422231	0.410935	0.60936	0.764879	0.480616	0.32789	0.529668	0.453525	0.525739	0.525453	0.49492	0.405681	0.362866	0.577807	0.498433	0.608642	0.665176	0.679419	0.526947	0.559698	0.494035	0.504741	0.451388	0.541817	0.406735	0.565298	0.473932	0.565348	0.440017	0.47758
31	0.199967	0.342377	0.306885	0.715599	0.414968		0.509193	0.665249	0.489269	0.461649	0.741011	0.602388	0.747531	0.529931	0.530734	0.500072	0.516363	0.501879	0.577483	0.659195	0.410606	0.60036	0.704623	0.492001	0.295476	0.457063	0.520913	0.545377	0.480349	0.493733	0.444629	0.421668	0.553363	0.532859	0.686291	0.680046	0.636788	0.598679	0.650954	0.460201	0.585645	0.5078	0.603647	0.516768	0.573233	0.461552	0.57939	0.438345	0.457594
32	0.245111	0.416434	0.356389	0.668979	0.379165		0.461313	0.649519	0.486723	0.516393	0.782992	0.624822	0.648668	0.639273	0.488946	0.607137	0.623068	0.539525	0.573666	0.508073	0.456052	0.595218	0.727706	0.394245	0.323217	0.427382	0.491152	0.48738	0.515722	0.461449	0.420515	0.40664	0.614147	0.501561	0.683338	0.690073	0.684728	0.594484	0.634287	0.497163	0.487331	0.447801	0.5297	0.452472	0.504109	0.432826	0.546223	0.442037	0.514353
33	0.271373	0.399445	0.47613	0.63822	0.433809		0.417728	0.606567	0.398592	0.483211	0.845644	0.625908	0.474381	0.575304	0.425553	0.629294	0.596582	0.554926	0.604075	0.483653	0.401739	0.66104	0.570193	0.417504	0.356416	0.545632	0.455753	0.493643	0.433401	0.470254	0.476794	0.476497	0.582098	0.479777	0.750305	0.78524	0.695234	0.629107	0.568053	0.486247	0.614572	0.461001	0.537211	0.443581	0.543793	0.425838	0.539451	0.422077	0.537491
34	0.28699	0.472239	0.343557	0.611226	0.44904		0.42553	0.623106	0.455351	0.496327	0.913138	0.664251	0.58354	0.79217	0.475116	0.636612	0.432836	0.525414	0.555482	0.647439	0.467734	0.443258	0.71079	0.461242	0.291091	0.52028	0.423191	0.515629	0.413689	0.466506	0.542457	0.532499	0.543926	0.510007	0.727199	0.833468	0.785981	0.70151	0.607323	0.51913	0.591139	0.444513	0.461675	0.417366	0.55372	0.492725	0.543002	0.389642	0.514552
35	0.269341	0.470323	0.429139	0.623952	0.436672		0.388954	0.648017	0.46525	0.469959	0.702548	0.665043	0.697814	0.47083	0.477894	0.564872	0.512192	0.509737	0.679426	0.624385	0.421369	0.485014	0.668582	0.474582	0.309869	0.509466	0.420558	0.527708	0.513483	0.406571	0.475691	0.468814	0.695843	0.418601	0.63388	0.826205	0.725961	0.630437	0.577104	0.481699	0.591887	0.499917	0.461527	0.411268	0.612264	0.498255	0.563438	0.413532	0.518174
36	0.228693	0.448429	0.378678	0.616063	0.443222		0.33264	0.648232	0.486935	0.448959	0.646627	0.715549	0.661291	0.500852	0.519651	0.536166	0.626382	0.606983	0.588537	0.540365	0.38248	0.467463	0.587042	0.402593	0.363034	0.454626	0.410733	0.512497	0.523717	0.387558	0.415718	0.374941	0.651845	0.550744	0.638414	0.780723	0.737401	0.72262	0.669394	0.487879	0.630125	0.415152	0.629636	0.455739	0.594992	0.477508	0.571129	0.426562	0.527532
37	0.34973	0.295771	0.340745	0.461661	0.419311		0.350173	0.644001	0.472017	0.512227	0.767894	0.504527	0.488334	0.583342	0.745596	0.54639	0.564172	0.524493	0.525927	0.498568	0.368965	0.495708	0.637708	0.44756	0.313819	0.577065	0.427788	0.525048	0.519709	0.437813	0.523252	0.495869	0.641851	0.54201	0.540574	0.663077	0.733057	0.728431	0.614262	0.513512	0.620743	0.376673	0.666944	0.408874	0.562852	0.504201	0.565722	0.423576	0.557746
38	0.436398	0.454154	0.302978	0.684222	0.385028		0.383722	0.608539	0.496255	0.488761	0.565425	0.521665	0.59923	0.58217	0.38587	0.465276	0.472524	0.486199	0.550458	0.551864	0.345143	0.511557	0.630283	0.439238	0.278204	0.545902	0.363475	0.491519	0.481337	0.45728	0.498754	0.464421	0.645748	0.580497	0.588348	0.618275	0.655135	0.626079	0.612645	0.472886	0.497306	0.355749	0.631315	0.390226	0.511197	0.454732	0.561954	0.450389	0.528206
39	0.365934	0.447331	0.358897	0.643214	0.403385		0.385583	0.589123	0.548423	0.481477	0.69929	0.633014	0.707942	0.704692	0.495323	0.721998	0.461257	0.470952	0.481249	0.551466	0.369244	0.528051	0.531657	0.393919	0.346974	0.470343	0.478255	0.512405	0.473957	0.429727	0.500704	0.501787	0.648955	0.62782	0.540809	0.626321	0.612527	0.642925	0.56175	0.403148	0.592777	0.325629	0.649139	0.375386	0.535886	0.47797	0.529619	0.431998	0.558107
40	0.425305	0.529867	0.47562	0.578181	0.404583		0.381321	0.548891	0.449807	0.466161	0.657747	0.800412	0.645155	0.618843	0.508096	0.631254	0.425493	0.458895	0.554029	0.480001	0.376969	0.538482	0.582045	0.398676	0.293801	0.527271	0.450279	0.511841	0.488261	0.392706	0.498072	0.492145	0.733444	0.572673	0.479531	0.67946	0.578737	0.570621	0.498918	0.412441	0.456481	0.253316	0.588745	0.462406	0.545657	0.44134	0.545112	0.426371	0.580619
41	0.474686	0.412165	0.490497	0.712878	0.407933		0.334807	0.542702	0.496938	0.397767	0.808221	0.738149	0.712044	0.697287	0.633327	0.549038	0.385547	0.460616	0.536396	0.582588	0.428631	0.489702	0.571319	0.35262	0.30246	0.501845	0.413604	0.461768	0.490919	0.434282	0.413696	0.388442	0.567946	0.54634	0.688289	0.606023	0.451062	0.615444	0.55055	0.443217	0.517454	0.270129	0.514533	0.344271	0.415203	0.480438	0.548035	0.42951	0.590831
42	0.472945	0.501358	0.583092	0.607604	0.412343		0.348488	0.561133	0.450108	0.505753	0.48505	0.645667	0.624521	0.524805	0.418836	0.470428	0.577192	0.472793	0.613304	0.622951	0.448908	0.618935	0.533429	0.385224	0.315072	0.53368	0.347919	0.477752	0.372265	0.414641	0.476545	0.437992	0.718282	0.562965	0.546277	0.525095	0.614717	0.627063	0.492446	0.40927	0.531615	0.302663	0.559422	0.481556	0.525591	0.452112	0.542882	0.456245	0.620473
43	0.487134	0.542503	0.509519	0.624694	0.448749		0.361793	0.583086	0.437313	0.506831	0.613032	0.757555	0.676764	0.727441	0.357522	0.399315	0.562989	0.482724	0.477971	0.453845	0.405885	0.523056	0.651859	0.391302	0.302376	0.477305	0.472505	0.430161	0.383147	0.4415	0.424186	0.410878	0.641075	0.543805	0.593149	0.618241	0.550646	0.67445	0.547606	0.381021	0.494067	0.28402	0.542166	0.361373	0.664942	0.444357	0.529131	0.464937	0.664473
44	0.525156	0.498693	0.598843	0.600058	0.403877		0.364886	0.545881	0.42137	0.493043	0.597944	0.687795	0.566335	0.502501	0.475679	0.537132	0.596156	0.458392	0.550878	0.504905	0.446341	0.55087	0.599664	0.296579	0.35487	0.492161	0.441363	0.440134	0.438998	0.427999	0.369931	0.355596	0.706503	0.602482	0.652843	0.735056	0.664377	0.526892	0.544738	0.505901	0.498524	0.287091	0.497988	0.367132	0.515643	0.478002	0.561057	0.454353	0.673645
45	0.616823	0.63329	0.637048	0.601352	0.387255		0.368115	0.56088	0.459531	0.559787	0.641953	0.766549	0.606245	0.637995	0.482985	0.426334	0.611917	0.49203	0.590037	0.597404	0.444395	0.554602	0.583971	0.302176	0.323304	0.475444	0.428401	0.459444	0.461811	0.457715	0.388981	0.3954	0.648328	0.554494	0.658912	0.678739	0.691529	0.737265	0.526231	0.507578	0.593554	0.379388	0.545404	0.436405	0.638992	0.50553	0.557741	0.47795	0.700131
46	0.585498	0.743472	0.650231	0.632911	0.408905		0.39485	0.584251	0.378313	0.517431	0.747462	0.657445	0.704141	0.679458	0.466214	0.609043	0.383024	0.487558	0.572789	0.638469	0.442155	0.658522	0.568541	0.305226	0.290774	0.558701	0.494028	0.472451	0.406151	0.402918	0.471001	0.465656	0.622394	0.568403	0.590481	0.703668	0.693269	0.550222	0.621385	0.443159	0.437195	0.30842	0.593534	0.356927	0.541836	0.471778	0.578777	0.446295	0.698607
47	0.585565	0.570239	0.607722	0.629853	0.435375		0.336212	0.593843	0.475863	0.51467	0.577909	0.816042	0.697583	0.635447	0.651305	0.365291	0.484929	0.491918	0.766923	0.618282	0.306002	0.569101	0.571236	0.377106	0.313442	0.445879	0.451383	0.394306	0.373771	0.389868	0.492177	0.476202	0.654462	0.534104	0.608159	0.616899	0.705506	0.555059	0.586474	0.450622	0.597437	0.255953	0.530898	0.471222	0.552797	0.502909	0.58091	0.439412	0.696526
48	0.62696	0.658734	0.671107	0.598143	0.411281		0.386033	0.651595	0.464123	0.441204	0.612314	0.539691	0.72402	0.744184	0.759189	0.633795	0.583287	0.451224	0.462836	0.498101	0.42908	0.534955	0.634886	0.355037	0.370284	0.42043	0.385171	0.427943	0.395627	0.374057	0.420669	0.430967	0.753106	0.560037	0.640422	0.637826	0.647229	0.559629	0.590749	0.391753	0.57966	0.344159	0.538263	0.393673	0.63096	0.477692	0.603306	0.422451	0.635347
49	0.571845	0.654064	0.630163	0.586367	0.40947		0.358946	0.627846	0.445004	0.390812	0.588453	0.793367	0.638675	0.694688	0.692274	0.389791	0.590393	0.550226	0.416179	0.646444	0.399856	0.591036	0.615627	0.345849	0.358123	0.477949	0.390734	0.480401	0.379721	0.40951	0.369933	0.369224	0.684389	0.633051	0.547158	0.604787	0.615977	0.566898	0.651587	0.439	0.59123	0.270963	0.575097	0.327955	0.597357	0.493583	0.612411	0.460608	0.648
50	0.612823	0.756968	0.605383	0.593153	0.400122		0.399884	0.619137	0.516839	0.428885	0.633571	0.659339	0.865149	0.490424	0.465368	0.479865	0.480222	0.516266	0.565443	0.619576	0.402856	0.471031	0.599324	0.385772	0.373193	0.509687	0.450741	0.443656	0.346836	0.439869	0.399637	0.411039	0.706338	0.486146	0.517825	0.587201	0.568924	0.535587	0.542599	0.564344	0.604073	0.307971	0.606901	0.449914	0.569087	0.513655	0.595604	0.390939	0.6427
51	0.653381	0.824191	0.561037	0.559042	0.389669		0.377538	0.577957	0.417701	0.545622	0.709371	0.691883	0.703049	0.722376	0.512161	0.453537	0.468874	0.498553	0.57725	0.675726	0.382198	0.410625	0.553489	0.364192	0.339788	0.424292	0.553312	0.361194	0.330741	0.419352	0.436259	0.422972	0.760728	0.532039	0.52479	0.640967	0.62602	0.601197	0.547882	0.453074	0.716198	0.313143	0.473775	0.384417	0.476261	0.481336	0.606719	0.436025	0.610898
52	0.702129	0.824881	0.724103	0.530314	0.415962		0.340701	0.628564	0.414515	0.46985	0.761842	0.855906	0.59577	0.593544	0.593131	0.597469	0.609773	0.518525	0.468543	0.449549	0.38468	0.492927	0.537771	0.344023	0.296625	0.467288	0.444176	0.365125	0.340551	0.398616	0.373138	0.36029	0.742348	0.495334	0.567753	0.627045	0.646292	0.544672	0.532822	0.536262	0.590095	0.197143	0.54388	0.438887	0.460314	0.520438	0.604489	0.41987	0.584166
53	0.715442	0.796844	0.736797	0.515329	0.426129		0.387959	0.61988	0.448871	0.506177	0.656764	0.653722	0.670858	0.589398	0.543276	0.671546	0.624001	0.501416	0.446099	0.539307	0.358094	0.464816	0.504234	0.338044	0.33439	0.486991	0.402983	0.300176	0.368626	0.364034	0.401768	0.382204	0.77441	0.505389	0.602874	0.608394	0.665826	0.553486	0.491269	0.469417	0.538873	0.252598	0.554992	0.387065	0.462508	0.495003	0.65325	0.405858	0.533596
54	0.741451	0.778793	0.681097	0.589383	0.39947		0.396273	0.564618	0.387675	0.464099	0.643221	0.574357	0.801737	0.686137	0.503752	0.463698	0.435021	0.461194	0.455456	0.653932	0.3627	0.466954	0.504838	0.320756	0.307	0.480993	0.339313	0.335131	0.357023	0.310704	0.428287	0.421856	0.763683	0.576669	0.535079	0.614354	0.578805	0.594058	0.553807	0.497532	0.545077	0.33112	0.534715	0.415554	0.511696	0.521203	0.66821	0.390938	0.530898
55	0.820216	0.802288	0.756316	0.538261	0.433798		0.359525	0.526345	0.464005	0.605477	0.639468	0.656632	0.617301	0.47277	0.592921	0.542324	0.345923	0.43929	0.308292	0.508802	0.38254	0.49109	0.46292	0.398668	0.345556	0.45305	0.331711	0.325692	0.294779	0.367904	0.379823	0.366583	0.787583	0.489795	0.559015	0.593296	0.586735	0.565603	0.581895	0.474054	0.506081	0.353759	0.512004	0.386212	0.496882	0.524618	0.653147	0.396918	0.507217
56	0.885653	0.808109	0.815082	0.553606	0.403542		0.376341	0.508347	0.56219	0.588064	0.578547	0.764996	0.581573	0.649014	0.557882	0.460496	0.300116	0.425475	0.428591	0.575413	0.43348	0.371007	0.501456	0.415445	0.330616	0.488416	0.418101	0.373906	0.374963	0.357852	0.396067	0.384557	0.716034	0.54961	0.565248	0.613072	0.650253	0.539073	0.519138	0.485948	0.554669	0.31607	0.562514	0.431489	0.520427	0.556513	0.656527	0.371292	0.467132
57	0.850598	0.732148	0.686148	0.50775	0.412917		0.359513	0.454757	0.532228	0.513919	0.504939	0.663833	0.575185	0.549573	0.644369	0.505867	0.418812	0.402537	0.384713	0.583153	0.464875	0.423066	0.445806	0.409119	0.283551	0.507976	0.482506	0.384784	0.340235	0.437355	0.35973	0.358368	0.759537	0.530955	0.549962	0.625221	0.5918	0.574932	0.50434	0.471772	0.595893	0.282877	0.472235	0.408413	0.472156	0.523773	0.634125	0.372204	0.425505
58	0.907207	0.778046	0.573315	0.523643	0.366589		0.379027	0.448307	0.408449	0.5112	0.498042	0.606303	0.48568	0.542362	0.587626	0.600784	0.373162	0.396021	0.464142	0.509357	0.483719	0.405497	0.420731	0.466301	0.326048	0.467366	0.442181	0.440019	0.34609	0.40033	0.447436	0.429272	0.726289	0.499639	0.491452	0.548991	0.606215	0.475895	0.548329	0.414801	0.555102	0.316984	0.500101	0.4003	0.412251	0.470075	0.647418	0.36396	0.441692
59	0.938662	0.670569	0.633552	0.523932	0.405219		0.401833	0.381626	0.383939	0.590907	0.539017	0.529705	0.487654	0.582011	0.59948	0.574781	0.463136	0.383347	0.37722	0.565073	0.474545	0.346553	0.392398	0.467916	0.375839	0.44881	0.509523	0.536529	0.372729	0.479474	0.419683	0.400026	0.68217	0.456849	0.432913	0.485004	0.526614	0.488036	0.506498	0.444555	0.602267	0.244568	0.491771	0.413023	0.498731	0.462171	0.591641	0.390115	0.452088
60	0.63109	0.523153	0.712476	0.509616	0.409749		0.342267	0.28068	0.387664	0.55332	0.414674	0.491782	0.403272	0.441048	0.499944	0.517936	0.396014	0.371226	0.384744	0.430321	0.396396	0.314776	0.275055	0.45597	0.45014	0.436035	0.436311	0.504225	0.483842	0.437342	0.399816	0.387343	0.474757	0.306306	0.553639	0.504003	0.518826	0.426149	0.395253	0.368335	0.382645	0.534159	0.378623	0.372518	0.38647	0.40338	0.505415	0.404397	0.465656
[truncated: 44 more columns]

## Sheet: supp 3 aiii
Supp fig 3 a.iii.	position binned F
	VTA GCamp6s axons				LC GCamp6s axons
	slope	R-squared			slope	R-squared
roi 1	0.0134861	0.800163		roi 1	-0.000748345	0.0846124
roi 2	0.0103854	0.802366		roi 2	-0.000320163	0.00572997
roi 3	0.00744598	0.670042		roi 3	-0.000282185	0.0075491
roi 4	0.00255269	0.171457		roi 4	-0.000200269	0.0047845
roi 5	-0.000486642	0.16002		roi 5	-0.000553431	0.0120534
					0.00178669	0.138023
					0.00228315	0.157616
					0.00108718	0.0453874
					0.000148565	0.000782234
					0.000290601	0.00323502
					-0.00165495	0.0855654
					-0.000834293	0.085475
					-0.00205157	0.143933
					0.00177951	0.146409
					-0.000491199	0.0384861
					0.000272098	0.00278563
					-0.000911787	0.0306964
					0.000480348	0.0226466
					-0.000167723	0.00658495
					0.000258282	0.00869117
					-5.67344e-06	3.63247e-06
					-0.00256055	0.366979
					-0.00198544	0.147181
					-0.00242574	0.469742
					-0.00176436	0.236109
					-0.00176307	0.230487
					0.00597657	0.849157
					-0.00119821	0.1563
					-0.0014252	0.108057
					-0.00289726	0.349455
					-0.00110819	0.0697844
					-0.000903155	0.0640437
					-0.00168624	0.23188
					0.00128388	0.148622
					-0.000699675	0.0303135
					-0.00138497	0.0836743
					-0.00146964	0.122119
					-0.00115864	0.175102
					-0.00135486	0.136716
					0.00023561	0.0182691
					0.00111867	0.157891
					-0.00201846	0.601472
					0.00261163	0.230532
					0.00221664	0.491336
					0.00139192	0.165468
					-0.00156079	0.210328
					0.000228781	0.00314375
					-0.00236981	0.459112
					-0.00184779	0.295413
					-0.00197124	0.401914
					0.00174024	0.290313
					-0.00193598	0.409988
					-0.00130004	0.201364
					0.00217521	0.526857
					0.000369265	0.0267016
					0.000150696	0.00726105
					-7.91832e-05	0.00177135
					-0.000703751	0.105784
					-0.00178742	0.319737
					-0.00282996	0.470389
					0.000687144	0.119632
					-0.00283154	0.482962
					0.000488872	0.0394928
					0.00167446	0.444185
					0.0013127	0.187793
					-0.000378775	0.02113
					-0.0002606	0.00979384
					-0.000947248	0.132822
					-0.000661177	0.0834849
					-0.00160471	0.266358
					-0.00169021	0.261062
					-0.0052779	0.802234
					-0.00151809	0.227451
					-0.00122645	0.287135
					-0.00114706	0.226658
					0.00127232	0.195058
					0.00196559	0.270968
					0.00204434	0.381796
					0.000871391	0.0961101
					0.00120992	0.353077
					0.00113426	0.302236
					0.00153661	0.195735
					0.00064925	0.132775
					0.00123119	0.319354
					0.00101143	0.261174
					0.000512268	0.125714
					0.000360207	0.0127456

## Sheet: supp 3bi
Supp fig 3 bii	Velcotiy binned F
	VTA GCAMP6s axons						LC GCAMP6s axons
bin	roi1	roi2	roi3	roi4	roi5		roi 1	roi 2	roi 3	roi 4	roi 5	roi 6	roi 7	roi 8	roi 9	roi 10	roi 11	roi 12	roi 13	roi 14	roi 15	roi 16	roi 17	roi 18	roi 19	roi 20	roi 21	roi 22	roi 23	roi 24	roi 25	roi 26	roi 27	roi 28	roi 29	roi 30	roi 31	roi 32	roi 33	roi 34	roi 35	roi 36	roi 37	roi 38	roi 39	roi 40	roi 41	roi 42	roi 43
1	0.503409	0.487267	0.488502	0.473908	0.421346		0.325942	0.155256	0.301006	0.414986	0.442965	0.349864	0.376049	0.362953	0.398325	0.391009	0.396271	0.314645	0.376176	0.375076	0.390722	0.253014	0.219474	0.323818	0.42606	0.365716	0.404093	0.346203	0.406575	0.307138	0.380753	0.365699	0.32883	0.38153	0.385204	0.352808	0.376292	0.342791	0.341877	0.329198	0.341897	0.531454	0.3786	0.395391	0.371008	0.329217	0.317536	0.376311	0.253349
2	0.472439	0.477755	0.521583	0.458476	0.413991		0.32535	0.167216	0.315378	0.398729	0.440901	0.343736	0.387513	0.360805	0.402334	0.423207	0.39985	0.309108	0.358497	0.380666	0.387884	0.272973	0.196169	0.362851	0.405695	0.374696	0.423133	0.390936	0.418815	0.325435	0.396206	0.379938	0.328218	0.344595	0.380465	0.351161	0.387244	0.380189	0.345616	0.321687	0.32911	0.537461	0.361623	0.395558	0.376071	0.329243	0.318778	0.387888	0.279672
3	0.432566	0.488942	0.511272	0.435357	0.429141		0.345796	0.169445	0.320582	0.389476	0.452302	0.330742	0.394659	0.377187	0.395034	0.407001	0.429229	0.299854	0.375604	0.344434	0.406797	0.262843	0.203768	0.376263	0.427233	0.359546	0.461875	0.433373	0.379643	0.383163	0.400054	0.386693	0.343957	0.385859	0.384322	0.375689	0.371599	0.382441	0.361039	0.34815	0.367374	0.515394	0.393422	0.378125	0.413077	0.337253	0.332743	0.454603	0.395855
4	0.351947	0.499792	0.539575	0.390751	0.459531		0.396593	0.256924	0.371237	0.440479	0.489558	0.372767	0.381769	0.427459	0.406831	0.419892	0.412494	0.296963	0.402901	0.376984	0.372996	0.282645	0.201689	0.441358	0.439773	0.4103	0.494305	0.482391	0.392279	0.449053	0.445724	0.436282	0.365377	0.411343	0.389034	0.373487	0.405938	0.358997	0.434904	0.354253	0.42085	0.54782	0.376997	0.463299	0.432791	0.34701	0.335649	0.467757	0.439629
5	0.247211	0.443431	0.45712	0.375627	0.421506		0.310518	0.274314	0.395158	0.414165	0.54756	0.444609	0.408917	0.417096	0.429154	0.435787	0.471535	0.286466	0.38011	0.332757	0.367621	0.261214	0.20863	0.346926	0.379414	0.402656	0.52967	0.597878	0.49797	0.481262	0.413783	0.398661	0.346947	0.428018	0.425227	0.432786	0.454827	0.467494	0.532524	0.439137	0.501759	0.478906	0.446227	0.389579	0.547413	0.359767	0.370993	0.476504	0.486266
6	0.579244	0.446364	0.588044	0.449986	0.44856		0.321733	0.310942	0.442854	0.429165	0.519098	0.407903	0.413503	0.451145	0.421597	0.489449	0.496271	0.310019	0.378154	0.373698	0.349395	0.261696	0.206147	0.30152	0.399879	0.40765	0.429488	0.401032	0.33887	0.395053	0.406923	0.38107	0.411493	0.541831	0.562904	0.563406	0.573724	0.536377	0.521189	0.452002	0.522226	0.533938	0.545711	0.465062	0.565803	0.360376	0.359269	0.458343	0.477634
7	0.41618	0.505182	0.604402	0.361301	0.443056		0.328632	0.334803	0.37606	0.490841	0.495151	0.458892	0.452981	0.511196	0.496355	0.532207	0.571828	0.353853	0.407253	0.376132	0.365132	0.276187	0.237822	0.362221	0.348878	0.454926	0.456219	0.481071	0.37499	0.44978	0.416608	0.402384	0.40156	0.520676	0.59815	0.650755	0.631934	0.563124	0.500121	0.468915	0.525616	0.485036	0.517704	0.454528	0.575889	0.382033	0.42498	0.46207	0.479666
8	0.535227	0.462622	0.665892	0.597126	0.406641		0.348674	0.355936	0.411126	0.469913	0.476128	0.444622	0.497004	0.414592	0.483555	0.471614	0.405289	0.371132	0.445102	0.314198	0.438518	0.34439	0.244383	0.420925	0.366441	0.408788	0.526968	0.477477	0.375565	0.488306	0.345646	0.337462	0.422691	0.511068	0.583168	0.690898	0.625471	0.577333	0.542609	0.376298	0.488397	0.528305	0.560351	0.399826	0.538065	0.379782	0.443909	0.483499	0.491213
9	0.58534	0.459673	0.559768	0.561689	0.435273		0.396322	0.411145	0.419268	0.510782	0.460541	0.497565	0.47324	0.489272	0.476056	0.416008	0.437049	0.361533	0.547097	0.357282	0.383208	0.297345	0.298654	0.423924	0.337384	0.448828	0.439798	0.376458	0.316454	0.405973	0.41296	0.380674	0.389834	0.560647	0.54977	0.650297	0.654705	0.613511	0.610962	0.482987	0.590908	0.501446	0.508493	0.418603	0.681793	0.435407	0.476566	0.452919	0.496012
10	0.665613	0.566249	0.572447	0.359762	0.445114		0.35733	0.434016	0.442039	0.489051	0.5572	0.543057	0.479215	0.55996	0.50198	0.550722	0.467997	0.402926	0.520716	0.386668	0.563697	0.361281	0.277074	0.387718	0.362788	0.427115	0.478406	0.428488	0.364914	0.487652	0.435956	0.407921	0.400726	0.526801	0.586324	0.740572	0.67274	0.651287	0.483095	0.385321	0.486544	0.520634	0.604662	0.501301	0.49535	0.445686	0.494757	0.456658	0.514118
11	0.687681	0.532727	0.536479	0.316399	0.397156		0.291148	0.424942	0.373888	0.51409	0.640368	0.64781	0.53495	0.476725	0.60718	0.544634	0.327203	0.397142	0.422448	0.58104	0.461501	0.373249	0.327754	0.377438	0.389749	0.398257	0.420785	0.489178	0.427562	0.438431	0.480537	0.473658	0.435955	0.542493	0.588436	0.706689	0.645848	0.542435	0.72129	0.510082	0.710709	0.446341	0.489941	0.463867	0.594237	0.466229	0.537628	0.443693	0.518624
12	0.722367	0.467024	0.576682	0.446177	0.41082		0.420513	0.464611	0.45047	0.56537	0.510822	0.580774	0.508583	0.575751	0.493996	0.55962	0.436487	0.379029	0.435292	0.461975	0.488119	0.47265	0.370327	0.412021	0.403053	0.491688	0.483439	0.479613	0.376636	0.428142	0.399762	0.397102	0.416338	0.480292	0.600153	0.634583	0.668379	0.633836	0.590325	0.519032	0.555438	0.461658	0.523601	0.452232	0.548245	0.473926	0.555046	0.435896	0.506856
13	0.647151	0.413016	0.447865	0.422473	0.409811		0.334919	0.470693	0.45905	0.59212	0.549557	0.637348	0.527259	0.600044	0.613753	0.5421	0.461858	0.395944	0.394718	0.566817	0.415443	0.359742	0.378427	0.397521	0.354874	0.495167	0.372669	0.409462	0.399709	0.449963	0.438272	0.454973	0.430397	0.558782	0.554642	0.665804	0.628521	0.583061	0.579292	0.488922	0.52987	0.306429	0.622356	0.414942	0.578718	0.466005	0.57151	0.424455	0.516814
14	0.654044	0.344736	0.422166	0.480298	0.424632		0.318693	0.454927	0.440042	0.548917	0.526975	0.510682	0.401635	0.540215	0.49903	0.54619	0.425233	0.408757	0.427453	0.378964	0.434964	0.389514	0.392228	0.387812	0.318959	0.491425	0.431046	0.484484	0.400563	0.320782	0.447292	0.425484	0.456221	0.567701	0.6054	0.674335	0.614394	0.576556	0.435155	0.444725	0.588306	0.478926	0.557239	0.360296	0.634436	0.448936	0.568187	0.408196	0.501883
15	0.586551	0.446701	0.460041	0.599945	0.415578		0.411837	0.484637	0.45066	0.541182	0.576831	0.526938	0.446169	0.563927	0.616344	0.502262	0.454055	0.417317	0.425764	0.482123	0.406361	0.276592	0.42342	0.36949	0.340489	0.491626	0.425136	0.326328	0.342829	0.328114	0.408403	0.398759	0.526771	0.530319	0.580261	0.640686	0.627435	0.622299	0.657134	0.508256	0.606275	0.45472	0.702694	0.394584	0.629827	0.445445	0.553555	0.45696	0.526592
16	0.363142	0.467592	0.473217	0.644606	0.419043		0.331404	0.437306	0.428783	0.565202	0.599016	0.634323	0.466687	0.510268	0.492459	0.497285	0.448572	0.406613	0.340014	0.514881	0.526251	0.44603	0.373163	0.356569	0.335552	0.490279	0.439798	0.388363	0.32969	0.406945	0.456332	0.445734	0.41415	0.57354	0.548031	0.650992	0.614198	0.595641	0.566481	0.464179	0.62018	0.32403	0.611929	0.369666	0.511119	0.501262	0.577284	0.381823	0.516026
17	0.521068	0.440046	0.401062	0.502967	0.418151		0.391498	0.498024	0.426227	0.528571	0.658347	0.757812	0.415338	0.578269	0.705748	0.424706	0.782767	0.424634	0.602564	0.468323	0.48099	0.327139	0.391304	0.353106	0.321415	0.46484	0.439338	0.404932	0.358151	0.459386	0.422061	0.418929	0.47137	0.548453	0.512692	0.655109	0.626893	0.546624	0.512993	0.496191	0.510404	0.411173	0.539185	0.454701	0.540098	0.498557	0.558239	0.451769	0.528547
18	0.426581	0.367509	0.467786	0.564872	0.418676		0.375483	0.433779	0.428645	0.51426	0.722809	0.661519	0.604664	0.629625	0.551866	0.544689	0.464347	0.350053	0.481023	0.504504	0.453571	0.389356	0.413806	0.387582	0.331951	0.495131	0.420479	0.388464	0.367709	0.41612	0.432786	0.421089	0.411936	0.54412	0.538197	0.666599	0.628313	0.507036	0.56978	0.494789	0.533052	0.525255	0.515403	0.456139	0.471606	0.482197	0.569328	0.45281	0.546755
19	0.481082	0.456205	0.460034	0.604614	0.417634		0.321004	0.510622	0.432877	0.526993	0.455966	0.651099	0.537101	0.4764	0.769698	0.462884	0.691466	0.407866	0.453991	0.479166	0.537229	0.3941	0.447419	0.387058	0.331652	0.511389	0.440751	0.353673	0.438111	0.387297	0.502761	0.502235	0.464214	0.544999	0.557843	0.656733	0.657816	0.596498	0.622408	0.393218	0.528999	0.411283	0.538834	0.420773	0.50131	0.483594	0.554577	0.381873	0.641398
20	0.412597	0.409062	0.431116	0.602662	0.416658		0.346107	0.513114	0.381576	0.489441	0.650319	0.596881	0.56913	0.453785	0.560555	0.548559	0.448114	0.423117	0.500601	0.455384	0.420179	0.36183	0.404099	0.391045	0.356696	0.475148	0.430473	0.348409	0.372507	0.351373	0.431546	0.435484	0.488715	0.525549	0.561353	0.679996	0.678764	0.644293	0.571806	0.399775	0.568579	0.385509	0.568749	0.412277	0.51706	0.470241	0.571802	0.276828	0.667491
21	0.460241	0.482291	0.532745	0.58671	0.423384		0.460647	0.511921	0.442405	0.537548	0.606858	0.554803	0.701278	0.529646	0.570791	0.511516	0.599022	0.46578	0.418325	0.585714	0.377189	0.411147	0.435615	0.320162	0.327744	0.47686	0.401825	0.40752	0.370425	0.393192	0.425286	0.41807	0.444733	0.541392	0.592575	0.694904	0.590781	0.601165	0.595676	0.381491	0.651622	0.397009	0.591621	0.389828	0.46476	0.472281	0.534715	NaN	NaN
22	0.517278	0.481081	0.547924	0.593296	0.415198		0.343663	0.47437	0.404635	0.467336	0.661738	0.654829	0.620399	0.567676	0.667734	0.465792	0.460347	0.445324	0.402669	0.456832	0.520529	0.378797	0.500822	0.357065	0.295909	0.424005	0.452346	0.545215	0.409019	0.388435	0.419494	0.408948	0.401395	0.525337	0.622914	0.614007	0.68437	0.498109	0.515151	0.422025	0.530594	0.511067	0.566616	0.433664	0.593202	0.50458	0.564415	NaN	NaN
23	0.443287	0.435408	0.562533	0.589129	0.423451		0.343597	0.462226	0.422259	0.526756	0.522095	0.56539	0.545631	0.303193	0.463717	0.700952	0.478929	0.453709	0.457278	0.529453	0.384261	0.405285	0.528993	0.375418	0.303607	0.466258	0.464967	0.459472	0.374298	0.420958	0.479185	0.471147	0.470646	0.530206	0.539077	0.65532	0.609318	0.576361	0.527494	0.494056	0.450157	0.46444	0.651251	0.346777	0.526613	0.473806	0.571903	NaN	NaN
24	0.424626	0.650044	0.458137	0.506286	0.441392		0.345786	0.511163	0.441904	0.542379	0.739373	0.790535	0.726294	0.615416	0.585182	0.6456	0.584043	0.452122	0.508751	0.550465	0.343306	0.407166	0.466537	0.383036	0.315302	0.462041	0.447507	0.435873	0.364813	0.439873	0.473161	0.467968	0.465227	0.543284	0.568954	0.687873	0.627133	0.571359	0.537888	0.427928	0.586231	0.387903	0.584046	0.428172	0.586168	0.482179	0.563864	NaN	NaN
25	0.375974	0.649919	0.515184	0.46181	0.45431		0.407545	0.512518	0.413695	0.47823	0.735753	0.750154	0.484057	0.608588	0.517374	0.521813	0.668432	0.506947	0.376556	0.525897	0.350817	0.445689	0.508964	0.332194	0.318195	0.512358	0.475089	0.452227	0.393214	0.442918	0.469412	0.45146	0.427848	0.533064	0.584679	0.569658	0.555076	0.538172	0.550395	0.492338	0.590864	0.383929	0.591709	0.427388	0.482864	0.486867	0.547814	NaN	NaN
26	0.428999	0.38509	0.392942	0.501808	0.514628		0.371464	0.483131	0.381622	0.475631	0.740673	0.467544	0.374182	0.489753	0.429413	0.545542	0.37196	0.504875	0.519486	0.571631	0.386959	0.364638	0.476736	0.36982	0.341924	0.476741	0.464446	0.474952	0.441488	0.468634	0.485195	0.456838	0.453166	0.525066	0.571481	0.75167	0.696434	0.553016	0.571468	0.381472	0.565255	0.36454	0.539413	0.427902	0.470819	0.474743	0.542865	NaN	NaN
27	0.299576	0.60785	0.564434	0.438593	0.462112		0.372784	0.482409	0.490914	0.55793	0.635859	0.545544	0.570056	0.650641	0.618961	0.522975	0.579465	0.524318	0.421983	0.615113	0.341025	0.552056	0.510446	0.393277	0.351938	0.502583	0.463662	0.442223	0.363123	0.475058	0.44383	0.423341	0.499125	0.507231	0.662558	0.759867	0.55914	0.64965	0.563494	0.438722	0.640886	0.318119	0.611266	0.39173	0.57401	0.466048	0.57495	NaN	NaN
28	0.3505	0.583322	0.508819	0.406127	0.454463		0.425033	0.540965	0.437874	0.462774	0.380162	0.599803	0.45701	0.415505	0.755928	0.608851	0.550617	0.415657	0.538459	0.556474	0.285984	0.531533	0.530609	0.451753	0.376556	0.533222	0.410091	0.490681	0.441879	0.483924	0.454098	0.433858	0.496263	0.4936	0.589374	0.72197	0.65629	0.712416	0.544019	0.487123	0.600897	0.37309	0.498498	0.384878	0.545275	0.522032	0.57984	NaN	NaN
29	0.267654	0.454413	0.529156	0.443916	0.484463		0.374919	0.546165	0.47317	0.499785	0.727919	0.636278	0.566809	0.729775	0.700914	0.626321	0.602941	0.500739	0.367417	0.486478	0.486398	0.398974	0.526192	0.416624	0.282862	0.525575	0.349736	0.450014	0.445752	0.421748	0.511538	0.501633	0.605261	0.53193	0.5206	0.68877	0.690013	0.609755	0.632902	0.451584	0.576643	0.421377	0.601731	0.498371	0.438243	0.474235	0.55224	NaN	NaN
30	0.390769	0.460488	0.483988	0.320799	0.477097		0.329415	0.495923	0.419489	0.518849	0.596662	0.669371	0.671156	0.56301	0.600954	0.401822	0.480774	0.49981	0.417816	0.493778	0.438163	0.430153	0.554887	0.425841	0.34155	0.529713	0.438622	0.490886	0.486552	0.47594	0.443245	0.429589	0.50746	0.594346	0.609152	0.673239	0.631385	0.662012	0.522479	0.404243	0.637772	0.482629	0.594492	0.38323	0.476312	0.500098	0.564211	NaN	NaN
31	0.368677	0.466532	0.396252	0.299611	0.515417		0.364744	0.512877	0.444512	0.456906	0.648949	0.456344	0.677461	0.577747	0.352619	0.660995	0.395507	0.48927	0.554451	0.520978	0.466437	0.420572	0.486954	0.40393	0.315305	0.522014	0.42821	0.506732	0.49215	0.480604	0.395075	0.381389	0.556948	0.554607	0.605808	0.647401	0.757889	0.624695	0.609305	0.493426	0.631408	0.395862	0.491766	0.392474	0.536683	0.429441	0.688801	NaN	NaN
32	0.346861	0.393212	0.455724	0.423089	0.500728		0.375216	0.53599	0.44916	0.542324	0.684145	0.627391	0.818609	0.500301	0.474097	0.487769	0.484085	0.542146	0.422256	0.424863	0.292421	0.356641	0.489193	0.387853	0.266161	0.523354	0.410735	0.465654	0.450005	0.424369	0.462708	0.451615	0.633647	0.550784	0.558299	0.608364	0.585556	0.532071	0.516135	0.606271	0.546698	0.378621	0.519709	0.392903	0.550948	0.493601	0.77053	NaN	NaN
33	0.404243	0.412437	0.38491	NaN	0.480845		0.414816	0.500344	0.437355	0.455802	0.765804	0.628626	0.666525	0.545787	0.575183	0.522263	0.598037	0.569081	0.515033	0.646669	0.403956	0.53421	0.63272	0.444722	0.300904	0.530667	0.331468	0.528737	0.485148	0.487056	0.453301	0.437093	0.521706	0.551052	0.616439	0.633499	0.645116	0.709239	0.572447	0.408669	0.621746	0.388666	0.4731	0.39153	0.533497	0.643716	0.427017	NaN	NaN
34	0.205836	0.35321	0.393534	NaN	0.487065		0.37002	0.569712	0.439617	0.487375	0.477316	0.478468	0.581894	0.743915	0.62149	0.524673	0.455572	0.518084	0.632666	0.568761	0.452148	0.513354	0.533891	0.566882	0.246035	0.868504	0.463211	0.523779	0.507586	0.45859	0.479862	0.463622	0.669533	0.600094	0.605663	0.67505	0.560293	0.445517	0.595305	0.461859	0.557644	0.38034	0.574198	0.34469	0.563524	0.554063	0.461827	NaN	NaN
35	0.27527	0.425084	0.344963	NaN	0.471623		0.437197	0.523471	0.480483	0.441767	0.726366	0.715271	0.648971	0.618938	0.599999	0.51224	0.659704	0.485273	0.663874	0.691063	0.260917	0.664535	0.589767	0.468254	0.354915	0.591639	0.432795	0.543366	0.491934	0.508139	0.475918	0.459628	0.661135	0.581367	0.61162	0.718309	0.827887	0.506391	0.512826	0.444628	0.466321	0.578144	0.56996	0.401807	0.542072	NaN	NaN	NaN	NaN
36	0.395331	0.376817	0.316201	NaN	0.425773		0.395761	0.508334	0.417364	0.457556	0.691866	0.859686	0.578674	0.829952	0.499885	0.38665	0.432844	0.550695	0.563094	0.484002	0.432219	0.418527	0.529818	0.494311	0.374338	0.519565	0.338664	0.544627	0.497729	0.450895	0.476179	0.459571	0.513721	0.56705	0.685206	0.753472	0.637046	0.673707	0.639794	0.491564	0.71015	0.402557	0.666065	0.379716	0.49328	0.311183	0.547413	NaN	NaN
37	0.268527	0.417112	0.399309	NaN	0.475183		0.367378	0.519504	0.424535	0.473693	0.64144	0.654128	0.625807	0.630638	0.658438	0.465667	0.606997	0.431058	0.391137	0.578291	0.366657	0.63068	0.628517	0.347617	0.387206	0.550189	0.508539	0.50051	0.469499	0.465451	0.399291	0.377302	0.682108	0.519152	0.729419	0.707895	0.744727	0.602922	0.549444	0.496647	0.64489	0.401598	0.518726	0.504248	0.398699	NaN	NaN	NaN	NaN
38	0.20246	0.489874	0.240706	NaN	0.429641		0.44611	0.508318	0.429662	0.560863	0.56851	0.580212	0.614754	0.554662	0.438735	0.489667	0.62632	0.479859	0.552028	0.5705	0.409125	0.392236	0.543076	0.308882	0.364316	0.615158	0.710985	0.526552	0.418529	0.466904	0.516129	0.50367	0.626723	0.602484	0.55481	0.755075	0.577521	0.678406	0.588822	0.529793	0.623891	0.419559	0.604051	0.424641	0.43213	NaN	NaN	NaN	NaN
39	0.233164	0.296355	0.384326	NaN	0.500039		0.424987	0.547928	0.525698	0.511609	0.67065	0.625539	0.574768	0.575511	0.472193	0.553141	0.589009	0.480194	0.617974	0.398057	0.427022	0.366564	0.543693	NaN	NaN	NaN	NaN	0.551993	0.528645	0.477423	0.490043	0.472946	0.473025	0.545852	0.587564	0.794551	0.744484	0.548735	0.55568	0.464956	0.583696	0.465375	0.690642	0.480399	0.626652	NaN	NaN	NaN	NaN
40	0.319712	0.106028	0.261051	NaN	0.40472		0.421202	0.541073	0.416552	0.569041	0.739869	0.628082	0.538162	0.567298	0.494264	0.511122	0.546517	0.487529	0.566319	0.622529	0.414123	0.394806	0.664482	NaN	NaN	NaN	NaN	0.418881	0.512076	0.391604	0.357141	0.335462	0.438394	0.508347	0.639859	0.697857	0.647391	0.470744	0.466484	0.472585	0.487708	0.358265	0.48846	0.402924	0.404961	NaN	NaN	NaN	NaN
41	0.285492	0.567689	0.2464	NaN	0.400831		0.298573	0.563032	0.467101	0.4678	0.824816	0.643102	0.451566	0.485306	0.53979	0.562485	0.655407	0.452794	0.46237	0.525604	0.420328	0.452625	0.508606	NaN	NaN	NaN	NaN	0.553621	0.583647	0.489133	0.49103	0.475881	0.632908	0.58641	0.641314	0.688616	0.54874	0.598486	0.435018	0.499813	0.39447	0.338212	0.622145	0.387598	0.536722	NaN	NaN	NaN	NaN
42	0.154518	NaN	NaN	NaN	0.590953		0.436825	0.563241	0.432552	0.463526	0.729033	0.505777	0.549251	0.359994	0.53266	0.550605	0.604983	0.589583	0.612941	0.575666	0.358798	0.616854	0.560298	NaN	NaN	NaN	NaN	0.579645	0.488883	0.466729	0.499913	0.476834	0.601527	0.547075	0.59598	0.665904	0.595663	0.543065	0.483395	0.581406	0.5986	0.437894	0.536863	0.398349	0.703719	NaN	NaN	NaN	NaN
43	0.272313	NaN	NaN	NaN	NaN		0.459487	0.674584	0.400466	0.439521	0.604539	0.709745	0.703354	0.685408	0.558746	0.490576	0.523581	0.477349	0.613153	0.57624	0.366659	0.561582	0.570984	NaN	NaN	NaN	NaN	0.567947	0.60734	0.461092	0.589832	0.579532	0.53209	0.480687	0.644019	0.706	0.684478	0.589187	0.619508	0.467681	0.461009	0.310791	0.659424	0.457027	0.520431	NaN	NaN	NaN	NaN
44	0.360472	NaN	NaN	NaN	0.282608		0.392038	0.60421	0.436956	0.553337	0.753786	0.650474	0.452354	0.577019	0.416081	0.44882	0.619674	0.509415	0.34039	0.692158	0.395643	0.55588	0.534285	NaN	NaN	NaN	NaN	0.500898	0.694853	0.650035	0.596675	0.638335	0.599105	0.553937	0.64971	0.773687	0.730502	0.532178	0.458389	0.376024	0.531203	0.407568	0.532113	0.178626	0.564941	NaN	NaN	NaN	NaN
45	0.268128	NaN	NaN	NaN	NaN		0.358222	0.510739	0.430888	0.57519	0.739765	0.610816	0.728125	0.639127	0.517338	0.575021	0.487008	0.544828	0.495151	0.495476	0.378158	0.487489	0.610752	NaN	NaN	NaN	NaN	0.341774	0.319277	0.243072	0.541183	0.530427	0.571381	0.591025	0.522145	0.602961	0.602014	0.598188	0.597401	0.49776	0.456142	0.236218	0.472355	0.285881	0.546939	NaN	NaN	NaN	NaN
46	0.458944	NaN	NaN	NaN	NaN		0.386772	0.522391	0.542418	0.370445	0.707032	0.689761	0.815481	0.676604	0.451553	0.507742	0.572184	0.487891	0.498911	0.405778	0.457813	0.580609	0.578879	NaN	NaN	NaN	NaN	NaN	NaN	NaN	NaN	NaN	0.559674	0.548423	0.55284	0.777528	0.62249	0.687046	0.431336	0.418631	0.46391	0.363573	0.486133	0.29712	0.505641	NaN	NaN	NaN	NaN
47	0.294966	NaN	NaN	0.933652	NaN		0.388125	0.589852	0.484418	0.53141	0.637977	0.704204	0.634976	0.681488	0.528478	0.601068	0.542566	0.463451	0.603585	0.59785	0.283922	0.492407	0.52795	NaN	NaN	NaN	NaN	NaN	NaN	NaN	NaN	NaN	0.630599	0.674706	0.52722	0.643965	0.618467	0.407943	0.636336	0.521661	0.526241	0.326438	0.614942	0.480705	0.436258	NaN	NaN	NaN	NaN
48	0.241926	NaN	NaN	NaN	NaN		0.319945	0.550656	0.476281	0.607079	0.734709	0.611643	0.663371	0.66106	0.486664	0.521531	0.617971	0.456982	0.519228	0.578178	0.367249	0.580481	0.600189	NaN	NaN	NaN	NaN	NaN	NaN	NaN	NaN	NaN	0.502996	0.571533	0.736959	0.692413	0.672248	0.72258	0.597562	0.489453	0.507001	0.568356	0.653091	0.382581	0.499949	NaN	NaN	NaN	NaN
49	NaN	NaN	NaN	NaN	NaN		0.432918	0.556756	0.41579	0.325892	0.722131	0.684041	0.548086	0.557528	0.522671	0.536012	0.451342	0.582196	0.566127	0.564948	0.455376	0.441763	0.611597	NaN	NaN	NaN	NaN	NaN	NaN	NaN	NaN	NaN	0.483445	0.573611	0.644181	0.73288	0.693655	0.691066	0.462135	0.378643	0.433557	0.367495	0.339476	0.458831	0.386553	NaN	NaN	NaN	NaN
50	0.203736	NaN	NaN	NaN	NaN		0.306356	0.562308	0.369273	0.426888	0.753192	0.772051	0.683666	0.564611	0.504766	0.40006	0.457498	0.484443	0.595817	0.696153	0.417194	0.396761	0.61285	NaN	NaN	NaN	NaN	NaN	NaN	NaN	NaN	NaN	0.54704	0.534978	0.503525	0.652496	0.622768	0.560994	0.523887	0.369768	0.48299	0.305396	0.740513	0.445283	0.581155	NaN	NaN	NaN	NaN
51	0.250917	NaN	NaN	NaN	NaN		0.441116	0.565399	0.463909	0.373223	0.631509	0.636471	0.605481	0.718242	0.598883	0.62999	0.429593	0.458599	0.53336	0.506087	0.380088	0.494352	0.614705	NaN	NaN	NaN	NaN	NaN	NaN	NaN	NaN	NaN	0.606038	0.54589	0.576093	0.7196	0.673234	0.613091	0.493299	0.577902	0.566251	0.260216	0.584628	0.407719	0.481929	NaN	NaN	NaN	NaN
52	NaN	NaN	NaN	1.10038	NaN		0.407148	0.636852	0.482247	0.333139	0.666979	0.823729	0.728609	0.536322	0.457278	0.392849	0.595185	0.353314	0.549141	0.460641	0.403779	0.461544	0.52139	NaN	NaN	NaN	NaN	NaN	NaN	NaN	NaN	NaN	0.583098	0.575069	0.621457	0.557132	0.613609	0.657505	0.499624	0.59478	0.587449	0.11115	0.53939	0.407549	0.491715	NaN	NaN	NaN	NaN
53	NaN	NaN	NaN	NaN	NaN		0.443661	0.625035	0.427747	NaN	0.641021	0.627105	0.714056	0.632889	0.431067	0.609495	0.593646	0.512243	0.615303	0.407576	0.416817	0.710558	0.627591	NaN	NaN	NaN	NaN	NaN	NaN	NaN	NaN	NaN	0.569187	0.647936	0.572429	0.615861	0.661277	0.620389	0.650966	0.550562	0.476606	0.213588	0.5701	0.383715	0.564832	NaN	NaN	NaN	NaN
54	NaN	NaN	NaN	NaN	NaN		0.380293	0.611613	0.491653	NaN	0.660458	0.770149	0.753965	0.696009	0.497309	0.625039	0.479477	0.483473	0.579828	0.507524	0.509437	0.606376	0.611952	NaN	NaN	NaN	NaN	NaN	NaN	NaN	NaN	NaN	0.540084	0.636134	0.586272	0.621463	0.414028	0.512651	0.655674	0.457563	0.46094	0.481344	0.625718	0.486243	0.426181	NaN	NaN	NaN	NaN
55	NaN	NaN	NaN	NaN	NaN		0.250561	0.609898	0.387761	NaN	0.635957	0.740376	0.824695	0.561578	0.378055	0.469857	0.569425	0.46281	0.444367	0.551512	0.325473	0.371875	0.552379	NaN	NaN	NaN	NaN	NaN	NaN	NaN	NaN	NaN	0.597314	0.55271	0.578783	0.55623	0.551501	0.519271	0.526966	0.494682	0.550313	0.191483	0.508144	0.280007	0.598249	NaN	NaN	NaN	NaN
56	NaN	NaN	NaN	NaN	NaN		0.44494	0.528289	0.517674	NaN	0.624198	0.79422	0.607508	0.667247	0.469186	0.49945	0.725225	0.536015	0.600481	0.750927	0.401047	0.446301	0.64267	NaN	NaN	NaN	NaN	NaN	NaN	NaN	NaN	NaN	0.472929	0.456192	0.654944	0.694305	0.619868	0.65969	0.519421	0.448281	0.731118	0.342499	0.552011	0.359248	0.698552	NaN	NaN	NaN	NaN
57	NaN	NaN	NaN	NaN	NaN		0.391543	0.616417	0.535169	NaN	0.84362	0.834305	0.536852	0.554556	0.63089	0.453716	0.485658	0.514293	0.479385	0.576448	0.376076	0.60936	0.617268	NaN	NaN	NaN	NaN	NaN	NaN	NaN	NaN	NaN	0.636371	0.596125	0.52519	0.636728	0.541976	0.658414	0.542498	0.504633	0.577291	0.293339	0.600297	0.489483	0.664912	NaN	NaN	NaN	NaN
58	NaN	NaN	NaN	NaN	NaN		0.417166	0.58722	0.487424	NaN	0.683694	0.644289	0.683138	0.893267	0.660176	0.609724	0.535656	0.475882	0.580796	0.470094	0.368757	0.477078	0.627977	NaN	NaN	NaN	NaN	NaN	NaN	NaN	NaN	NaN	0.561058	0.747906	0.489092	0.547524	0.591189	0.42877	0.668316	0.308642	0.613875	0.435164	0.43103	0.41291	0.577565	NaN	NaN	NaN	NaN
59	NaN	NaN	NaN	NaN	NaN		0.488274	0.576652	0.557953	NaN	0.425561	0.556065	0.626867	0.569293	0.66431	0.435229	0.640829	0.507677	0.536302	0.533327	0.459705	0.478044	0.627551	NaN	NaN	NaN	NaN	NaN	NaN	NaN	NaN	NaN	0.58456	0.552027	0.742132	0.837997	0.96069	0.55916	0.604486	0.352406	0.676901	0.309746	0.563772	0.416863	0.575253	NaN	NaN	NaN	NaN
60	NaN	NaN	NaN	NaN	NaN		0.352065	0.596614	0.46856	NaN	0.5231	0.681166	0.770576	1.01786	0.516422	0.589177	0.44362	0.496687	0.573926	0.65464	0.342887	0.60968	0.666674	NaN	NaN	NaN	NaN	NaN	NaN	NaN	NaN	NaN	0.627281	0.64747	NaN	NaN	NaN	NaN	0.695939	0.383521	0.459343	0.26864	0.648683	0.512371	0.583752	NaN	NaN	NaN	NaN
[truncated: 44 more columns]

## Sheet: supp 3biii
Supp fig 3 b.iii.	velocity binned F
	VTA GCamp6s axons				LC GCamp6s axons
	slope	R-squared			slope	R-squared
roi 1	0.0134861	0.800163		roi 1	-0.000748345	0.0846124
roi 2	0.0103854	0.802366		roi 2	-0.000320163	0.00572997
roi 3	0.00744598	0.670042		roi 3	-0.000282185	0.0075491
roi 4	0.00255269	0.171457		roi 4	-0.000200269	0.0047845
roi 5	-0.000486642	0.16002		roi 5	-0.000553431	0.0120534
					0.00178669	0.138023
					0.00228315	0.157616
					0.00108718	0.0453874
					0.000148565	0.000782234
					0.000290601	0.00323502
					-0.00165495	0.0855654
					-0.000834293	0.085475
					-0.00205157	0.143933
					0.00177951	0.146409
					-0.000491199	0.0384861
					0.000272098	0.00278563
					-0.000911787	0.0306964
					0.000480348	0.0226466
					-0.000167723	0.00658495
					0.000258282	0.00869117
					-5.67344e-06	3.63247e-06
					-0.00256055	0.366979
					-0.00198544	0.147181
					-0.00242574	0.469742
					-0.00176436	0.236109
					-0.00176307	0.230487
					0.00597657	0.849157
					-0.00119821	0.1563
					-0.0014252	0.108057
					-0.00289726	0.349455
					-0.00110819	0.0697844
					-0.000903155	0.0640437
					-0.00168624	0.23188
					0.00128388	0.148622
					-0.000699675	0.0303135
					-0.00138497	0.0836743
					-0.00146964	0.122119
					-0.00115864	0.175102
					-0.00135486	0.136716
					0.00023561	0.0182691
					0.00111867	0.157891
					-0.00201846	0.601472
					0.00261163	0.230532
					0.00221664	0.491336
					0.00139192	0.165468
					-0.00156079	0.210328
					0.000228781	0.00314375
					-0.00236981	0.459112
					-0.00184779	0.295413
					-0.00197124	0.401914
					0.00174024	0.290313
					-0.00193598	0.409988
					-0.00130004	0.201364
					0.00217521	0.526857
					0.000369265	0.0267016
					0.000150696	0.00726105
					-7.91832e-05	0.00177135
					-0.000703751	0.105784
					-0.00178742	0.319737
					-0.00282996	0.470389
					0.000687144	0.119632
					-0.00283154	0.482962
					0.000488872	0.0394928
					0.00167446	0.444185
					0.0013127	0.187793
					-0.000378775	0.02113
					-0.0002606	0.00979384
					-0.000947248	0.132822
					-0.000661177	0.0834849
					-0.00160471	0.266358
					-0.00169021	0.261062
					-0.0052779	0.802234
					-0.00151809	0.227451
					-0.00122645	0.287135
					-0.00114706	0.226658
					0.00127232	0.195058
					0.00196559	0.270968
					0.00204434	0.381796
					0.000871391	0.0961101
					0.00120992	0.353077
					0.00113426	0.302236
					0.00153661	0.195735
					0.00064925	0.132775
					0.00123119	0.319354
					0.00101143	0.261174
					0.000512268	0.125714
					0.000360207	0.0127456

## Sheet: supp 3 ci
Supp fig 3 c.ii	motion intiation aligned F
	VTA GCAMP6s axons						LC GCAMP6s axons
time from motion initiation	roi1	roi2	roi3	roi4	roi5		roi 1	roi 2	roi 3	roi 4	roi 5	roi 6	roi 7	roi 8	roi 9	roi 10	roi 11	roi 12	roi 13	roi 14	roi 15	roi 16	roi 17	roi 18	roi 19	roi 20	roi 21	roi 22	roi 23	roi 24	roi 25	roi 26	roi 27	roi 28	roi 29	roi 30	roi 31	roi 32	roi 33	roi 34	roi 35	roi 36	roi 37	roi 38	roi 39	roi 40	roi 41	roi 42	roi 43
-1.93611	1.01131	0.602845	0.458433	0.61842	0.362052		0.340125	0.139765	0.276896	NaN	NaN	NaN	NaN	NaN	NaN	NaN	NaN	0.21805	0.597697	0.477463	0.368894	NaN	NaN	0.270799	0.307717	0.437766	0.341464	0.310431	0.499559	0.216425	0.27666	0.285475	0.472465	0.434247	0.448491	0.458583	0.613946	0.618899	0.313416	0.256637	0.278408	0.508742	0.306086	0.375085	0.427628	0.2091	0.207071	NaN	NaN
-1.8393	0.69047	0.491056	0.605323	0.748445	0.350921		0.275508	0.132376	0.309106	NaN	NaN	NaN	NaN	NaN	NaN	NaN	NaN	0.234644	0.22815	0.371609	0.340407	NaN	NaN	0.171706	0.322705	0.459614	0.454395	0.272631	0.435148	0.240078	0.290516	0.302977	0.511256	0.442296	0.622105	0.399408	0.436773	0.519547	0.298747	0.272118	0.205821	0.467704	0.242803	0.280562	0.453844	0.160068	0.137877	NaN	NaN
-1.7425	0.638441	0.47618	0.473687	0.705221	0.350891		0.303984	0.126672	0.323617	NaN	NaN	NaN	NaN	NaN	NaN	NaN	NaN	0.223033	0.117163	0.610301	0.313653	NaN	NaN	0.191481	0.273089	0.400444	0.33383	0.304877	0.439646	0.254652	0.327894	0.329774	0.50593	0.444846	0.493887	0.492734	0.513654	0.426285	0.406752	0.22632	0.226624	0.673348	0.38611	0.41349	0.42921	0.279545	0.275575	NaN	NaN
-1.64569	0.679878	0.594312	0.546637	0.654286	0.363846		0.317563	0.147396	0.321831	NaN	NaN	NaN	NaN	NaN	NaN	NaN	NaN	0.247774	0.463746	0.37275	0.42525	NaN	NaN	0.204976	0.255016	0.367951	0.257985	0.346477	0.452394	0.31887	0.348983	0.325919	0.523454	0.39179	0.502368	0.412585	0.631052	0.486368	0.258296	0.183388	0.179039	0.627296	0.263474	0.296713	0.284599	0.458803	0.186869	NaN	NaN
-1.54889	0.70634	0.474408	0.409556	0.515711	0.359744		0.301795	0.143256	0.301405	NaN	NaN	NaN	NaN	NaN	NaN	NaN	NaN	0.28127	0.137687	0.010065	0.288404	NaN	NaN	0.20648	0.265426	0.507103	0.310153	0.339782	0.428846	0.331328	0.385576	0.346458	0.587875	0.522774	0.569606	0.58138	0.285016	0.50054	0.25445	0.493505	0.335286	0.597898	0.214043	0.39283	0.317103	0.348059	0.0813584	NaN	NaN
-1.45208	0.587699	0.419219	0.394567	0.411658	0.341262		0.299155	0.14265	0.303113	NaN	NaN	NaN	NaN	NaN	NaN	NaN	NaN	0.242797	0.224481	0.291314	0.325875	NaN	NaN	0.271581	0.35358	0.442901	0.411771	0.377427	0.412967	0.2624	0.423482	0.391453	0.518544	0.3906	0.359829	0.53511	0.528675	0.354117	0.349377	0.429656	0.308453	0.696014	0.310916	0.335629	0.342094	0.246988	0.183549	NaN	NaN
-1.35528	0.612791	0.421163	0.508819	0.50452	0.347689		0.305228	0.168153	0.305457	NaN	NaN	NaN	NaN	NaN	NaN	NaN	NaN	0.292827	0.253725	0.494192	0.342043	NaN	NaN	0.349237	0.433604	0.326498	0.545923	0.335879	0.413044	0.195579	0.413295	0.386261	0.511361	0.406073	0.265928	0.347808	0.404145	0.295286	0.259662	0.425496	0.295483	0.674925	0.332887	0.440294	0.537429	0.290566	0.167495	NaN	NaN
-1.25847	0.657066	0.575356	0.409225	0.554666	0.372962		0.313194	0.151258	0.286751	NaN	NaN	NaN	NaN	NaN	NaN	NaN	NaN	0.366062	0.611207	0.362084	0.256612	NaN	NaN	0.324159	0.410731	0.300997	0.468569	0.291246	0.381032	0.174004	0.415792	0.367153	0.475374	0.330648	0.624469	0.344833	0.264054	0.276773	0.194396	0.297723	0.130169	0.583476	0.298454	0.361346	0.440329	0.137242	0.144022	NaN	NaN
-1.16167	0.595978	0.619158	0.521868	0.554277	0.36718		0.311946	0.141182	0.315469	NaN	NaN	NaN	NaN	NaN	NaN	NaN	NaN	0.243417	0.375893	0.46093	0.236472	NaN	NaN	0.256857	0.36435	0.243213	0.346079	0.306332	0.309747	0.194692	0.387784	0.34773	0.387969	0.4616	0.436886	0.403005	0.329966	0.594241	0.230026	0.503848	0.221833	0.571234	0.490661	0.326921	0.362706	0.27241	0.131655	NaN	NaN
-1.06486	0.581637	0.28464	0.387818	0.582415	0.310741		0.30933	0.147438	0.300243	NaN	NaN	NaN	NaN	NaN	NaN	NaN	NaN	0.220149	0.605884	0.128905	0.262821	NaN	NaN	0.288974	0.348109	0.299779	0.373703	0.35108	0.36123	0.23108	0.288878	0.272653	0.423402	0.295388	0.455142	0.314085	0.37191	0.527313	0.171884	0.242796	0.261983	0.499397	0.236832	0.273316	0.193178	0.394484	0.166376	NaN	NaN
-0.968054	0.583322	0.359789	0.374401	0.493302	0.256429		0.278699	0.158294	0.280313	NaN	NaN	NaN	NaN	NaN	NaN	NaN	NaN	0.268651	0.462662	-0.0318482	0.211148	NaN	NaN	0.269769	0.301961	0.362856	0.448942	0.400665	0.479143	0.22541	0.345266	0.320057	0.418557	0.42714	0.481719	0.54852	0.781724	0.432379	0.251299	0.388207	0.242091	0.68904	0.464781	0.35013	0.294856	0.17033	0.161409	NaN	NaN
-0.871249	0.487708	0.433003	0.462319	0.608103	0.250292		0.268978	0.146453	0.275689	NaN	NaN	NaN	NaN	NaN	NaN	NaN	NaN	0.25439	0.243707	0.153712	0.204568	NaN	NaN	0.123154	0.258818	0.416188	0.503574	0.390257	0.484754	0.201403	0.358144	0.33558	0.451264	0.35818	0.544848	0.225126	0.413879	0.525586	0.23444	0.396186	0.334952	0.382113	0.290028	0.432939	0.34845	0.195373	0.210116	NaN	NaN
-0.774443	0.584323	0.407305	0.315653	0.548351	0.308345		0.293432	0.126663	0.267408	NaN	NaN	NaN	NaN	NaN	NaN	NaN	NaN	0.40618	0.382059	0.548269	0.233162	NaN	NaN	0.11974	0.270818	0.354008	0.547508	0.328396	0.404852	0.231633	0.360611	0.346646	0.342529	0.271451	0.45022	0.265639	0.606698	0.423529	0.292226	0.476617	0.286628	0.521276	0.398404	0.44219	0.359131	0.411945	0.280461	NaN	NaN
-0.677638	0.396351	0.348275	0.378404	0.494541	0.380264		0.313717	0.132212	0.332699	NaN	NaN	NaN	NaN	NaN	NaN	NaN	NaN	0.253065	0.402576	0.0696551	0.242196	NaN	NaN	0.180808	0.284364	0.232362	0.542957	0.31026	0.371997	0.227756	0.395202	0.355162	0.405224	0.60131	0.393322	0.738652	0.354207	0.33838	0.313073	0.456089	0.226774	0.612296	0.182851	0.341674	0.417427	0.316361	0.317748	NaN	NaN
-0.580833	0.41142	0.469733	0.201252	0.496499	0.351164		0.331047	0.149609	0.361925	NaN	NaN	NaN	NaN	NaN	NaN	NaN	NaN	0.23883	0.331323	0.611246	0.162233	NaN	NaN	0.213581	0.270731	0.270421	0.469238	0.296227	0.356341	0.20476	0.344143	0.296043	0.354309	0.470485	0.467746	0.73567	0.451802	0.414064	0.331566	0.43078	0.322528	0.580501	0.496464	0.385058	0.358791	0.344212	0.395525	NaN	NaN
-0.484027	0.572494	0.325328	0.338605	0.556301	0.354971		0.333204	0.168565	0.326045	NaN	NaN	NaN	NaN	NaN	NaN	NaN	NaN	0.258989	0.50532	0.330266	0.125483	NaN	NaN	0.21396	0.219006	0.366803	0.480282	0.271896	0.345762	0.233745	0.377263	0.341252	0.397074	0.501424	0.573365	0.64857	0.611056	0.748246	0.224179	0.348893	0.241045	0.483492	0.489484	0.413923	0.35206	0.435604	0.446821	NaN	NaN
-0.387222	0.459095	0.331413	0.362287	0.682258	0.395129		0.324434	0.195799	0.274363	NaN	NaN	NaN	NaN	NaN	NaN	NaN	NaN	0.289284	0.552868	0.430948	0.139594	NaN	NaN	0.220103	0.223057	0.385529	0.506947	0.331005	0.35138	0.272635	0.371518	0.342682	0.453004	0.50509	0.568432	0.551962	0.337628	0.602982	0.372948	0.29803	0.174949	0.586876	0.414008	0.315231	0.498054	0.193209	0.32947	NaN	NaN
-0.290416	0.365488	0.304079	0.329393	0.583111	0.373381		0.324535	0.199518	0.27607	NaN	NaN	NaN	NaN	NaN	NaN	NaN	NaN	0.270155	0.573112	0.144863	0.126393	NaN	NaN	0.250511	0.356175	0.466361	0.531983	0.404332	0.432176	0.297008	0.382033	0.37384	0.386385	0.456417	0.56333	0.562498	0.463849	0.67294	0.328526	0.301605	0.348389	0.585764	0.517451	0.369291	0.461454	0.510988	0.475238	NaN	NaN
-0.193611	0.373426	0.361788	0.29399	0.548362	0.326214		0.333168	0.226491	0.339617	NaN	NaN	NaN	NaN	NaN	NaN	NaN	NaN	0.258918	0.488294	0.320097	0.14001	NaN	NaN	0.289604	0.449124	0.46094	0.483196	0.36683	0.504624	0.374926	0.397802	0.394946	0.378854	0.597756	0.657419	0.646784	0.514567	0.449491	0.457695	0.363732	0.338602	0.675893	0.366499	0.433232	0.501051	0.475193	0.597756	NaN	NaN
-0.0968054	0.321766	0.215258	0.46863	0.525093	0.336538		0.325405	0.296516	0.388976	NaN	NaN	NaN	NaN	NaN	NaN	NaN	NaN	0.279164	0.381306	0.278047	0.190602	NaN	NaN	0.316642	0.447126	0.341588	0.428015	0.354512	0.515033	0.432656	0.369601	0.364124	0.447274	0.550949	0.539231	0.725241	0.614079	0.517633	0.501638	0.343171	0.386351	0.461391	0.492402	0.386021	0.436492	0.681854	0.669559	NaN	NaN
-2.22045e-16	0.428988	0.258886	0.280429	0.566549	0.344789		0.357304	0.325443	0.382677	NaN	NaN	NaN	NaN	NaN	NaN	NaN	NaN	0.314743	0.487394	0.315922	0.16335	NaN	NaN	0.267424	0.455129	0.301698	0.410177	0.419683	0.42585	0.451334	0.405114	0.391649	0.496918	0.601832	0.673431	0.693955	0.855019	0.543106	0.434407	0.49086	0.361361	0.415249	0.438412	0.36849	0.577328	0.605368	0.611136	NaN	NaN
0.0968054	0.269255	0.308062	0.316149	0.533487	0.304331		0.376102	0.349585	0.369843	NaN	NaN	NaN	NaN	NaN	NaN	NaN	NaN	0.430308	0.456473	0.483976	0.123748	NaN	NaN	0.305901	0.568479	0.293027	0.492562	0.482391	0.377779	0.493406	0.461796	0.44529	0.513215	0.7061	0.912413	0.647701	0.789257	0.841535	0.458375	0.412461	0.421502	0.771397	0.437198	0.581706	0.479337	0.520726	0.514952	NaN	NaN
0.193611	0.286885	0.329783	0.39881	0.448378	0.318589		0.351746	0.365837	0.374898	NaN	NaN	NaN	NaN	NaN	NaN	NaN	NaN	0.366127	1.08187	0.192698	0.16546	NaN	NaN	0.359885	0.483795	0.33102	0.477753	0.516015	0.425314	0.513397	0.469326	0.464835	0.574147	0.647445	0.807574	0.786119	0.685475	0.712602	0.380146	0.516848	0.431528	0.451368	0.545868	0.538567	0.534084	0.648606	0.38324	NaN	NaN
0.290416	0.237881	0.283576	0.495963	0.423592	0.377741		0.36718	0.389987	0.380128	NaN	NaN	NaN	NaN	NaN	NaN	NaN	NaN	0.419266	0.735965	0.206689	0.13866	NaN	NaN	0.359542	0.427289	0.380093	0.414777	0.513625	0.41751	0.485101	0.495386	0.499675	0.519611	0.659274	0.652275	0.742888	0.575162	0.631434	0.484874	0.386421	0.363949	0.759616	0.554859	0.377197	0.610315	0.63827	0.4478	NaN	NaN
0.387222	0.252149	0.126101	0.385277	0.422247	0.367847		0.395119	0.435531	0.420978	NaN	NaN	NaN	NaN	NaN	NaN	NaN	NaN	0.34704	0.905502	0.281397	0.155806	NaN	NaN	0.417479	0.44383	0.389698	0.472048	0.531731	0.297139	0.486321	0.560382	0.544927	0.533365	0.67126	0.452103	0.743867	0.677874	1.02396	0.604626	0.460179	0.546252	0.590276	0.845707	0.345296	0.687378	0.389758	0.543548	NaN	NaN
0.484027	0.286008	0.439696	0.37783	0.384768	0.292037		0.428619	0.476707	0.433037	NaN	NaN	NaN	NaN	NaN	NaN	NaN	NaN	0.261166	0.48357	0.325835	0.22204	NaN	NaN	0.4731	0.42368	0.347591	0.480867	0.543882	0.280515	0.495321	0.596972	0.575656	0.552901	0.640356	0.528121	0.600014	0.853979	0.73476	0.616692	0.470894	0.624283	0.40248	0.738689	0.335759	0.581145	0.148302	0.447499	NaN	NaN
0.580833	0.230432	0.215521	0.435984	0.416715	0.299511		0.454114	0.493618	0.405707	NaN	NaN	NaN	NaN	NaN	NaN	NaN	NaN	0.382173	0.677052	0.346145	0.228231	NaN	NaN	0.427606	0.429883	0.373726	0.446801	0.517536	0.312386	0.449121	0.492069	0.497031	0.510289	0.57184	0.767121	0.534759	0.500683	0.648328	0.565993	0.391807	0.599886	0.5442	0.758909	0.452831	0.610902	0.320055	0.437223	NaN	NaN
0.677638	0.301824	0.315245	0.38334	0.428424	0.325094		0.437749	0.528893	0.403015	NaN	NaN	NaN	NaN	NaN	NaN	NaN	NaN	0.392357	0.810068	0.379019	0.200705	NaN	NaN	0.390454	0.402617	0.461073	0.49415	0.496942	0.280387	0.424659	0.454225	0.449971	0.483815	0.576114	0.634886	1.02125	0.737403	0.854963	0.532052	0.45365	0.553078	0.384598	0.804479	0.488236	0.437281	0.315385	0.39917	NaN	NaN
0.774443	0.270682	0.227119	0.427392	0.318313	0.289765		0.428525	0.582309	0.437939	NaN	NaN	NaN	NaN	NaN	NaN	NaN	NaN	0.350411	0.558708	0.352106	0.186534	NaN	NaN	0.400022	0.358068	0.563674	0.520963	0.496031	0.254943	0.399188	0.414475	0.386286	0.572521	0.601114	0.516415	0.543196	0.663926	0.465586	0.633168	0.418516	0.5457	0.592499	0.856436	0.547623	0.670891	0.296729	0.265622	NaN	NaN
0.871249	0.276216	0.354044	0.481696	0.301382	0.320073		0.414144	0.582179	0.473995	NaN	NaN	NaN	NaN	NaN	NaN	NaN	NaN	0.479446	1.05708	0.624497	0.227382	NaN	NaN	0.364922	0.33662	0.628435	0.453008	0.524209	0.286111	0.415681	0.378443	0.346171	0.520823	0.635814	0.528478	0.603637	0.865595	0.806802	0.660502	0.50959	0.660625	0.375926	0.541138	0.617257	0.658805	0.372274	0.586107	NaN	NaN
0.968054	0.190504	0.289812	0.41092	0.285177	0.368047		0.419894	0.573154	0.501321	NaN	NaN	NaN	NaN	NaN	NaN	NaN	NaN	0.423867	0.523016	0.278634	0.135481	NaN	NaN	0.405845	0.290232	0.601071	0.36556	0.521152	0.312107	0.470206	0.475854	0.413235	0.58427	0.550862	0.704702	0.77486	0.87197	0.339485	0.666289	0.442144	0.534822	0.54883	0.867589	0.488779	0.538742	0.65017	0.46778	NaN	NaN
1.06486	0.282337	0.337496	0.393595	0.432726	0.369391		0.404775	0.579517	0.487258	NaN	NaN	NaN	NaN	NaN	NaN	NaN	NaN	0.400134	0.521424	0.278097	0.0245097	NaN	NaN	0.452276	0.291427	0.500908	0.356929	0.479953	0.346014	0.521674	0.590292	0.536912	0.59369	0.530137	0.754916	0.965853	0.895613	0.614095	0.722473	0.297366	0.559674	0.493428	0.634808	0.493575	0.736135	0.354013	0.620505	NaN	NaN
1.16167	0.260899	0.269093	0.357787	0.455573	0.372382		0.407329	0.590633	0.482596	NaN	NaN	NaN	NaN	NaN	NaN	NaN	NaN	0.387311	0.692911	0.374629	0.191745	NaN	NaN	0.365786	0.349316	0.520376	0.377228	0.43849	0.413433	0.530615	0.638552	0.611802	0.638783	0.677591	0.533296	1.06019	0.817961	0.745783	0.74906	0.45911	0.805735	0.433185	0.51188	0.410017	0.703749	0.534814	0.378218	NaN	NaN
1.25847	0.15791	0.312847	0.340414	0.350571	0.372116		0.426757	0.590285	0.495514	NaN	NaN	NaN	NaN	NaN	NaN	NaN	NaN	0.284227	0.319557	0.397677	0.270127	NaN	NaN	0.288332	0.378815	0.583107	0.385123	0.478222	0.480247	0.47891	0.616202	0.594195	0.575677	0.582326	0.6813	1.11794	0.761753	0.525802	0.65186	0.273658	0.680051	0.446334	0.534178	0.389596	0.454245	0.347127	0.403068	NaN	NaN
1.35528	0.177754	0.261098	0.379469	0.346732	0.381006		0.442963	0.599184	0.525744	NaN	NaN	NaN	NaN	NaN	NaN	NaN	NaN	0.362525	0.717149	0.310554	0.44357	NaN	NaN	0.32555	0.386772	0.487784	0.401069	0.530718	0.432533	0.438731	0.585694	0.573691	0.561535	0.831341	1.03465	1.04454	1.14578	0.695608	0.629971	0.309771	0.496066	0.313533	0.462572	0.455871	0.631668	0.494888	0.597208	NaN	NaN
1.45208	0.150039	0.151704	0.354361	0.590294	0.388664		0.399168	0.597556	0.569937	NaN	NaN	NaN	NaN	NaN	NaN	NaN	NaN	0.302212	0.840461	0.412833	0.288651	NaN	NaN	0.369456	0.322226	0.481009	0.382471	0.57718	0.420226	0.477751	0.489058	0.485026	0.597744	0.760315	0.640332	0.896491	1.07894	0.677893	0.62187	0.423928	0.700627	0.26812	0.640924	0.485203	0.46798	0.320577	0.456488	NaN	NaN
1.54889	0.120247	0.211618	0.277475	0.568007	0.399488		0.355695	0.57263	0.490745	NaN	NaN	NaN	NaN	NaN	NaN	NaN	NaN	0.278269	0.473019	0.175033	0.338606	NaN	NaN	0.368434	0.323988	0.450016	0.419817	0.625952	0.442902	0.482083	0.483892	0.448269	0.643775	0.507328	1.04136	0.835918	1.04505	0.583942	0.586613	0.354134	0.727155	0.162531	0.532345	0.46656	0.724074	0.665822	0.532975	NaN	NaN
1.64569	0.124329	0.345255	0.374373	0.58879	0.393176		0.348275	0.549396	0.384101	NaN	NaN	NaN	NaN	NaN	NaN	NaN	NaN	0.287505	0.470184	0.574169	0.539462	NaN	NaN	0.354081	0.270854	0.400708	0.451199	0.606338	0.472006	0.512131	0.564463	0.521831	0.567471	0.562153	0.777293	0.839797	0.672934	0.3858	0.478977	0.50771	0.793658	0.320819	0.716664	0.380076	0.480111	0.41965	0.576467	NaN	NaN
1.7425	0.108227	0.272196	0.242894	0.591047	0.377887		0.34131	0.553387	0.405173	NaN	NaN	NaN	NaN	NaN	NaN	NaN	NaN	0.266025	-0.00589977	0.240231	0.683762	NaN	NaN	0.320904	0.230263	0.391819	0.44398	0.52774	0.480105	0.526892	0.564999	0.531271	0.65035	0.587233	0.492489	0.878993	0.681907	0.700827	0.598021	0.466414	0.606779	0.330021	0.566297	0.496578	0.50209	0.430985	0.533297	NaN	NaN
1.8393	0.181015	0.257617	0.275502	0.621845	0.356424		0.344852	0.544606	0.434967	NaN	NaN	NaN	NaN	NaN	NaN	NaN	NaN	0.348082	0.449295	0.342405	0.709854	NaN	NaN	0.23991	0.317427	0.379524	0.501413	0.60774	0.528509	0.521562	0.420493	0.411261	0.669563	0.785688	0.756052	0.952544	0.852329	0.659393	0.629248	0.33431	0.458615	0.35504	0.532563	0.438815	0.672426	0.225509	0.595263	NaN	NaN
1.93611	0.137564	0.255523	0.238706	0.640701	0.306363		0.341423	0.514282	0.424328	NaN	NaN	NaN	NaN	NaN	NaN	NaN	NaN	0.309616	0.363304	0.0213729	0.709101	NaN	NaN	0.296778	0.340239	0.373933	0.44864	0.64555	0.550341	0.481282	0.308198	0.316176	0.632187	0.783025	0.824955	0.818583	0.852176	0.468353	0.606911	0.388519	0.640268	0.23837	0.661828	0.461423	0.538573	0.618239	0.488292	NaN	NaN
2.03291	0.103411	0.362342	0.39879	0.769384	0.294646		0.363614	0.501295	0.435654	NaN	NaN	NaN	NaN	NaN	NaN	NaN	NaN	0.372309	0.455719	0.187674	0.768022	NaN	NaN	0.347097	0.377863	0.381504	0.397279	0.62682	0.452784	0.430909	0.361214	0.352821	0.76991	0.71964	0.926199	0.944056	0.852999	0.61482	0.5817	0.444133	0.6815	0.289024	0.598221	0.541651	0.467112	0.483372	0.360701	NaN	NaN
2.12972	0.096081	0.289903	0.33752	0.655925	0.323982		0.365037	0.538539	0.444885	NaN	NaN	NaN	NaN	NaN	NaN	NaN	NaN	0.314011	0.282471	0.625229	0.798998	NaN	NaN	0.281659	0.354146	0.509376	0.42717	0.632742	0.484325	0.418847	0.405855	0.400388	0.612903	0.712439	0.573194	0.895324	0.913811	0.655692	0.58703	0.528376	0.553806	0.396445	0.589022	0.454992	0.421798	0.29773	0.562215	NaN	NaN
2.22652	0.123102	0.208158	0.258462	0.613478	0.323815		0.385689	0.562957	0.426795	NaN	NaN	NaN	NaN	NaN	NaN	NaN	NaN	0.315122	0.385017	0.204956	0.82271	NaN	NaN	0.290756	0.322594	0.564975	0.552755	0.594129	0.551429	0.445171	0.468145	0.463045	0.649801	0.582617	0.64942	0.848059	1.06026	0.532637	0.68508	0.344548	0.527293	0.534186	0.569944	0.287764	0.484052	0.368835	0.522075	NaN	NaN
2.32333	0.135581	0.20705	0.209467	0.884856	0.304442		0.377658	0.576384	0.421924	NaN	NaN	NaN	NaN	NaN	NaN	NaN	NaN	0.440288	0.263805	0.749093	0.800957	NaN	NaN	0.321457	0.277373	0.549009	0.615252	0.548685	0.507686	0.517628	0.522304	0.505795	0.700264	0.446726	0.689684	0.534279	0.712312	0.63	0.581131	0.463046	0.381542	0.440945	0.572335	0.371996	0.498705	0.975452	0.739704	NaN	NaN
2.42014	0.128625	0.265556	0.285538	0.675781	0.30607		0.323392	0.600035	0.405405	NaN	NaN	NaN	NaN	NaN	NaN	NaN	NaN	0.380034	0.21801	0.706245	0.834273	NaN	NaN	0.283383	0.280067	0.53397	0.507959	0.548588	0.491273	0.577406	0.55047	0.514523	0.797815	0.425396	0.513024	0.874611	0.734289	0.793781	0.479659	0.494554	0.41874	0.355814	0.38903	0.396833	0.51305	0.416855	0.675342	NaN	NaN
2.51694	0.065711	0.319969	0.494982	0.714621	0.300474		0.321192	0.614198	0.442321	NaN	NaN	NaN	NaN	NaN	NaN	NaN	NaN	0.362195	0.663586	0.503865	0.659736	NaN	NaN	0.282029	0.32158	0.430461	0.394535	0.518386	0.425128	0.622316	0.553072	0.499364	0.687696	0.602527	0.868847	0.701978	1.00376	0.705417	0.525433	0.411188	0.472881	0.44239	0.507927	0.508344	0.424653	0.484391	0.632784	NaN	NaN
2.61375	0.0859811	0.271837	0.292365	0.768168	0.303917		0.388758	0.65677	0.457497	NaN	NaN	NaN	NaN	NaN	NaN	NaN	NaN	0.328148	0.0812355	0.289256	0.673569	NaN	NaN	0.258904	0.277424	0.396481	0.409552	0.508976	0.472093	0.63742	0.484607	0.443612	0.723244	0.406656	0.740133	0.7385	1.1512	0.842405	0.495074	0.367286	0.521859	0.3881	0.514906	0.392284	0.512633	0.646951	0.653323	NaN	NaN
2.71055	0.143353	0.373139	0.394167	0.727442	0.314675		0.421059	0.700533	0.462837	NaN	NaN	NaN	NaN	NaN	NaN	NaN	NaN	0.384021	0.38968	0.452664	0.545426	NaN	NaN	0.254642	0.218386	0.35878	0.440697	0.506974	0.575605	0.531403	0.411823	0.395584	0.738599	0.576263	0.730793	0.734801	0.560207	0.632277	0.503129	0.303138	0.493985	0.281687	0.44759	0.300906	0.348222	0.307592	0.586582	NaN	NaN
2.80736	0.0581351	0.261844	0.384223	0.666146	0.345308		0.425046	0.698942	0.470299	NaN	NaN	NaN	NaN	NaN	NaN	NaN	NaN	0.263288	0.420112	0.151682	0.586887	NaN	NaN	0.325674	0.184591	0.456116	0.445125	0.581783	0.57093	0.481738	0.378045	0.385259	0.69372	0.581351	0.632338	0.769194	0.842925	0.832992	0.500476	0.528376	0.713205	0.418374	0.506615	0.426807	0.559219	0.590528	0.683703	NaN	NaN
2.90416	0.128582	0.272088	0.346292	0.662837	0.307373		0.426063	0.628763	0.527875	NaN	NaN	NaN	NaN	NaN	NaN	NaN	NaN	0.325458	0.885046	0.329676	0.685164	NaN	NaN	0.33346	0.211988	0.529093	0.50739	0.621697	0.505326	0.475423	0.372821	0.381447	0.691292	0.437104	0.707987	0.746823	0.688316	0.705309	0.56689	0.445747	0.565377	0.477276	0.525	0.382519	0.463881	0.364526	0.831443	NaN	NaN
3.00097	0.134319	0.125165	0.321135	0.81763	0.270673		0.39009	0.591375	0.53326	NaN	NaN	NaN	NaN	NaN	NaN	NaN	NaN	0.315472	0.237862	0.191654	0.552501	NaN	NaN	0.25306	0.234154	0.447973	0.48031	0.510665	0.457061	0.39603	0.321011	0.323087	0.740102	0.538296	0.774233	0.657943	0.606136	0.651782	0.436276	0.40448	0.701225	0.56554	0.462783	0.435801	0.447439	0.727953	0.830826	NaN	NaN
3.09777	0.102463	0.229478	0.384913	0.568265	0.31117		0.397995	0.61188	0.467042	NaN	NaN	NaN	NaN	NaN	NaN	NaN	NaN	0.384585	0.641331	-0.0333277	0.470077	NaN	NaN	0.304061	0.258791	0.464592	0.491838	0.467166	0.501512	0.393865	0.264166	0.266361	0.769397	0.502196	0.761052	0.783429	0.487343	0.590666	0.573502	0.379313	0.743013	0.346943	0.493641	0.535669	0.490453	0.626898	0.523727	NaN	NaN
3.19458	0.147668	0.242309	0.370698	0.653359	0.327505		0.409233	0.624225	0.487986	NaN	NaN	NaN	NaN	NaN	NaN	NaN	NaN	0.368716	0.587637	0.194833	0.577257	NaN	NaN	0.350955	0.299973	0.560595	0.575825	0.453806	0.591893	0.453936	0.262332	0.258031	0.611667	0.559636	0.683503	0.89337	0.794514	0.377415	0.584852	0.538271	0.492577	0.444367	0.599064	0.411925	0.516373	0.344197	0.701379	NaN	NaN
3.29138	0.141244	0.257672	0.269285	0.648947	0.344861		0.393796	0.6358	0.504022	NaN	NaN	NaN	NaN	NaN	NaN	NaN	NaN	0.324373	0.458828	0.444479	0.537838	NaN	NaN	0.253841	0.296655	0.47852	0.751465	0.437426	0.585364	0.482517	0.381152	0.36338	0.688703	0.465281	0.519227	0.682401	0.701113	0.679822	0.578065	0.344021	0.802817	0.436059	0.703177	0.356145	0.64087	0.468064	0.547662	NaN	NaN
3.38819	0.127847	0.32031	0.366743	0.676652	0.368639		0.372684	0.68586	0.593971	NaN	NaN	NaN	NaN	NaN	NaN	NaN	NaN	0.226479	0.412034	0.0701882	0.48457	NaN	NaN	0.224519	0.279318	0.442711	0.672544	0.513922	0.512897	0.520957	0.554617	0.533659	0.782583	0.618872	0.532062	0.80129	0.729148	0.873131	0.759751	0.379327	0.603747	0.246503	0.528257	0.38868	0.506491	0.421543	0.634989	NaN	NaN
3.485	0.071635	0.417578	0.400272	0.656936	0.273474		0.385277	0.673954	0.549352	NaN	NaN	NaN	NaN	NaN	NaN	NaN	NaN	0.290152	0.424845	0.502238	0.419409	NaN	NaN	0.211239	0.337957	0.49613	0.455004	0.566142	0.555177	0.412831	0.573373	0.55585	0.793819	0.51952	0.443868	0.854598	0.858905	0.849376	0.645489	0.561913	0.647999	0.348781	0.451333	0.493959	0.434256	0.329654	0.696126	NaN	NaN
3.5818	0.172836	0.280899	0.366808	0.703456	0.249111		0.415699	0.645188	0.425753	NaN	NaN	NaN	NaN	NaN	NaN	NaN	NaN	0.311483	0.546802	0.338106	0.358868	NaN	NaN	0.263754	0.35654	0.543693	0.548335	0.582205	0.662122	0.399865	0.47461	0.455142	0.803641	0.499597	0.370199	0.805213	0.801093	0.703172	0.588618	0.46756	0.663357	0.322836	0.56318	0.562164	0.56931	0.519725	0.432477	NaN	NaN
3.67861	0.124788	0.31738	0.367555	0.688119	0.300526		0.429155	0.615663	0.463412	NaN	NaN	NaN	NaN	NaN	NaN	NaN	NaN	0.308082	0.299672	0.0635436	0.34246	NaN	NaN	0.304409	0.333452	0.536007	0.634596	0.577045	0.67529	0.463975	0.422135	0.426172	0.726205	0.667556	0.675023	0.711236	0.725068	0.510694	0.550095	0.491615	0.655228	0.391584	0.487984	0.511627	0.418985	0.409778	0.457102	NaN	NaN
3.77541	0.120372	0.337414	0.340901	0.642021	0.318852		0.425208	0.588097	0.541793	NaN	NaN	NaN	NaN	NaN	NaN	NaN	NaN	0.22118	0.639768	0.271506	0.320533	NaN	NaN	0.215904	0.267949	0.458526	0.488179	0.513419	0.654355	0.47958	0.421378	0.430395	0.778619	0.522446	0.549279	0.747282	0.915419	0.650028	0.555573	0.501156	0.513163	0.339417	0.572848	0.482448	0.681759	0.432208	0.546124	NaN	NaN
3.87222	0.182237	0.235693	0.349519	0.789744	0.32958		0.42708	0.583734	0.524993	NaN	NaN	NaN	NaN	NaN	NaN	NaN	NaN	0.285288	0.751932	0.205316	0.395371	NaN	NaN	0.238197	0.303569	0.452425	0.385265	0.536939	0.605328	0.465944	0.407511	0.398205	0.767061	0.67893	0.52334	0.862112	0.771229	0.539284	0.610025	0.444526	0.599508	0.259481	0.45116	0.498525	0.39609	0.443174	0.531945	NaN	NaN
3.96902	0.13317	0.241831	0.317047	0.796738	0.293492		0.42684	0.596436	0.468353	NaN	NaN	NaN	NaN	NaN	NaN	NaN	NaN	0.356996	0.54374	0.299598	0.364144	NaN	NaN	0.338529	0.370139	0.614562	0.458336	0.618651	0.530909	0.504028	0.427945	0.420074	0.8118	0.523148	0.41726	0.712078	0.526052	0.776477	0.676242	0.468174	0.500815	0.285302	0.493778	0.437044	0.739361	0.256906	0.589107	NaN	NaN
4.06583	0.144637	0.363445	0.346851	0.571678	0.295053		0.381946	0.618459	0.469762	NaN	NaN	NaN	NaN	NaN	NaN	NaN	NaN	0.269505	0.316303	0.51967	0.345596	NaN	NaN	0.276988	0.327949	0.511074	0.436864	0.614971	0.514771	0.535537	0.416478	0.411969	0.837769	0.559355	0.391988	0.606131	0.48525	0.612944	0.553081	0.46495	0.646466	0.419085	0.32833	0.386969	0.435195	0.472723	0.53937	NaN	NaN
4.16263	0.133104	0.217486	0.53023	0.718652	0.311813		0.401979	0.603029	0.46294	NaN	NaN	NaN	NaN	NaN	NaN	NaN	NaN	0.339225	0.16668	0.316458	0.402213	NaN	NaN	0.192174	0.256453	0.357399	0.422167	0.538688	0.581926	0.532421	0.432197	0.438229	0.768052	0.598996	0.403252	0.703425	0.893425	0.575204	0.564872	0.517207	0.567149	0.239363	0.426646	0.415675	0.653526	0.66681	0.540245	NaN	NaN
4.25944	0.187904	0.204502	0.285216	0.698224	0.342514		0.430463	0.578825	0.491416	NaN	NaN	NaN	NaN	NaN	NaN	NaN	NaN	0.388921	0.603812	0.45266	0.322337	NaN	NaN	0.19664	0.247724	0.385482	0.538444	0.5222	0.641849	0.547626	0.444133	0.454731	0.752654	0.536186	0.529813	0.497843	0.85176	0.464815	0.538774	0.531185	0.486222	0.391062	0.551546	0.361913	0.519837	0.36777	0.554994	NaN	NaN
4.35624	0.16224	0.37864	0.291951	0.732848	0.362872		0.375188	0.586134	0.525059	NaN	NaN	NaN	NaN	NaN	NaN	NaN	NaN	0.339664	0.466533	0.415456	0.381607	NaN	NaN	0.265427	0.254506	0.427704	0.645783	0.560027	0.64343	0.540883	0.428834	0.405415	0.758887	0.459371	0.553212	0.976276	0.891494	0.620036	0.597216	0.44686	0.491101	0.242043	0.364219	0.348882	0.627959	0.339556	0.564347	NaN	NaN
4.45305	0.216451	0.426149	0.388535	0.751302	0.344608		0.340935	0.591984	0.457766	NaN	NaN	NaN	NaN	NaN	NaN	NaN	NaN	0.35515	0.852594	-0.078782	0.180449	NaN	NaN	0.322379	0.246552	0.437985	0.627929	0.52541	0.586802	0.505621	0.339657	0.341472	0.766154	0.596746	0.591494	0.804858	0.62464	0.696059	0.642066	0.564312	0.724472	0.302247	0.420898	0.331153	0.426014	0.553781	0.476187	NaN	NaN
4.54985	0.166405	0.289361	0.262272	0.638206	0.317775		0.350548	0.601594	0.38663	NaN	NaN	NaN	NaN	NaN	NaN	NaN	NaN	0.259038	0.494261	0.401775	0.25049	NaN	NaN	0.294722	0.298702	0.440004	0.490541	0.55586	0.551626	0.491246	0.289252	0.299139	0.923243	0.490344	0.47811	1.0357	0.665015	0.732555	0.549364	0.540287	0.734285	0.193445	0.283265	0.267301	0.59174	0.331909	0.521988	NaN	NaN
4.64666	0.287766	0.383985	0.32821	0.724042	0.294695		0.369277	0.590963	0.384811	NaN	NaN	NaN	NaN	NaN	NaN	NaN	NaN	0.381518	0.627574	0.260645	0.288663	NaN	NaN	0.287045	0.333694	0.470007	0.440021	0.643794	0.537818	0.557301	0.296694	0.266924	0.803175	0.488761	0.757969	0.584185	0.724416	0.690979	0.53061	0.457662	0.632327	0.184641	0.462192	0.352106	0.49221	0.629654	0.428619	NaN	NaN
4.74347	0.28603	0.460922	0.118422	0.550936	0.305343		0.411256	0.595967	0.419408	NaN	NaN	NaN	NaN	NaN	NaN	NaN	NaN	0.381305	0.360026	0.456945	0.204718	NaN	NaN	0.257763	0.274619	0.478118	0.434055	0.648525	0.534023	0.561543	0.388036	0.344739	0.849058	0.533861	0.592753	0.780879	0.822397	0.534783	0.48425	0.561678	0.454733	0.262931	0.354715	0.242776	0.494542	0.379396	0.536411	NaN	NaN
4.84027	0.24696	0.347145	0.459719	0.697157	0.287614		0.444835	0.590381	0.484295	NaN	NaN	NaN	NaN	NaN	NaN	NaN	NaN	0.253673	0.540636	0.141753	0.104665	NaN	NaN	0.233923	0.198837	0.480071	0.439268	0.53627	0.545912	0.469877	0.418835	0.402916	0.856191	0.54303	0.443239	0.845148	0.648342	0.698189	0.498205	0.435241	0.605476	0.43764	0.391929	0.363348	0.594497	0.593879	0.35935	NaN	NaN
4.93708	0.262902	0.173555	0.222244	0.664394	0.263849		0.435776	0.551509	0.495121	NaN	NaN	NaN	NaN	NaN	NaN	NaN	NaN	0.255374	0.459972	0.0502568	0.126006	NaN	NaN	0.258555	0.11303	0.502275	0.403333	0.565753	0.531639	0.432614	0.388094	0.367796	0.708809	0.423337	0.663926	0.572295	0.513771	0.92768	0.511309	0.580049	0.418782	0.218714	0.676363	0.51172	0.625503	0.323216	0.478491	NaN	NaN
5.03388	0.344931	0.347705	0.326475	0.732306	0.259701		0.419976	0.545869	0.500986	NaN	NaN	NaN	NaN	NaN	NaN	NaN	NaN	0.273173	0.139846	0.518329	0.298475	NaN	NaN	0.355265	0.215191	0.397614	0.359103	0.578598	0.579907	0.464391	0.352705	0.313836	0.698069	0.407287	0.624657	0.660658	0.741797	0.620375	0.600824	0.591108	0.532137	0.358446	0.610161	0.366333	0.602689	0.538025	0.274206	NaN	NaN
5.13069	0.399027	0.486749	0.317354	0.702679	0.274474		0.399414	0.557779	0.487019	NaN	NaN	NaN	NaN	NaN	NaN	NaN	NaN	0.308326	0.269329	0.43271	0.268326	NaN	NaN	0.380705	0.275873	0.340804	0.374876	0.5615	0.643226	0.501942	0.317143	0.25592	0.620655	0.746957	0.563496	0.59527	0.79278	0.649395	0.551266	0.385924	0.60362	0.382737	0.581105	0.418533	0.54918	0.417509	0.347597	NaN	NaN
5.22749	0.435821	0.352295	0.46734	0.779333	0.289381		0.401212	0.544936	0.424478	NaN	NaN	NaN	NaN	NaN	NaN	NaN	NaN	0.193112	0.567455	0.406222	0.163583	NaN	NaN	0.309245	0.189453	0.370922	0.356062	0.573955	0.655991	0.473534	0.319781	0.259356	0.705284	0.678205	0.568687	0.738517	0.785934	0.668334	0.543915	0.516118	0.57201	0.264058	0.411596	0.38358	0.608693	0.322921	0.456549	NaN	NaN
5.3243	0.479886	0.40928	0.415016	0.723916	0.300252		0.423464	0.540585	0.453332	NaN	NaN	NaN	NaN	NaN	NaN	NaN	NaN	0.216328	0.70707	0.375004	0.239678	NaN	NaN	0.298562	0.201243	0.399259	0.35827	0.478422	0.616021	0.423823	0.335354	0.320161	0.716341	0.465666	0.381129	0.507902	0.808487	0.611816	0.578818	0.535003	0.568048	0.26474	0.653706	0.431292	0.488165	0.293705	0.513438	NaN	NaN
5.4211	0.535684	0.314477	0.41745	0.821486	0.345567		0.411528	0.549677	0.452851	NaN	NaN	NaN	NaN	NaN	NaN	NaN	NaN	0.217823	0.245451	0.399437	0.149502	NaN	NaN	0.302256	0.218726	0.460723	0.376484	0.447984	0.553045	0.43532	0.38391	0.359224	0.736777	0.482432	0.473345	0.658915	0.480509	0.638346	0.549175	0.514607	0.535816	0.283446	0.468093	0.432803	0.45226	0.242119	0.494103	NaN	NaN
5.51791	0.54746	0.295566	0.37777	0.679878	0.342628		0.383182	0.576964	0.454908	NaN	NaN	NaN	NaN	NaN	NaN	NaN	NaN	0.201652	0.235403	0.303547	0.267675	NaN	NaN	0.314859	0.196796	0.610185	0.405001	0.474964	0.483636	0.446664	0.424746	0.413206	0.766095	0.559772	0.581403	0.858556	0.540081	0.854159	0.498048	0.544389	0.567981	0.335389	0.674075	0.263329	0.332527	0.282396	0.492772	NaN	NaN
5.61471	0.647784	0.336249	0.390288	0.615339	0.297398		0.360959	0.592127	0.473974	NaN	NaN	NaN	NaN	NaN	NaN	NaN	NaN	0.216675	0.233075	0.391184	0.131393	NaN	NaN	0.348257	0.198704	0.53539	0.44837	0.51628	0.485133	0.407373	0.382926	0.377299	0.590185	0.653825	0.547624	0.81085	0.735569	0.855174	0.484002	0.330904	0.655544	0.290378	0.577917	0.344667	0.227506	0.48988	0.500032	NaN	NaN
5.71152	0.606138	0.444203	0.270056	0.72503	0.332207		0.370412	0.579882	0.465075	NaN	NaN	NaN	NaN	NaN	NaN	NaN	NaN	0.171785	0.339837	0.395453	0.087853	NaN	NaN	0.374442	0.235163	0.357823	0.424036	0.520254	0.548058	0.4348	0.388691	0.367533	0.652565	0.455532	0.676074	0.532566	0.504964	0.417333	0.557228	0.411972	0.574339	0.340414	0.64646	0.385533	0.555057	0.340785	0.442058	NaN	NaN
5.80833	0.540792	0.315747	0.273576	0.494566	0.360307		0.383975	0.547319	0.435822	NaN	NaN	NaN	NaN	NaN	NaN	NaN	NaN	0.153421	0.332499	0.184044	0.220865	NaN	NaN	0.409568	0.27454	0.44809	0.415308	0.568769	0.580614	0.465787	0.43586	0.434369	0.591332	0.465918	0.649045	0.757983	0.671172	0.580925	0.398488	0.24494	0.738968	0.306566	0.414573	0.450781	0.467498	0.400522	0.463338	NaN	NaN
5.90513	0.738871	0.395739	0.319518	0.544354	0.328207		0.347338	0.52117	0.426987	NaN	NaN	NaN	NaN	NaN	NaN	NaN	NaN	0.166857	0.710678	0.410491	0.374258	NaN	NaN	0.390245	0.242911	0.548289	0.426515	0.606994	0.472319	0.438807	0.411939	0.418349	0.689398	0.586279	0.611053	0.745157	0.74768	0.584475	0.403293	0.250576	0.522037	0.235073	0.531784	0.130758	0.383904	0.841131	0.567173	NaN	NaN
6.00194	0.63616	0.428123	0.337517	0.492314	0.333103		0.315338	0.526763	0.438149	NaN	NaN	NaN	NaN	NaN	NaN	NaN	NaN	0.235575	0.369177	0.14579	0.555878	NaN	NaN	0.341423	0.281422	0.474272	0.439469	0.604865	0.410129	0.464242	0.398848	0.395845	0.568712	0.467998	0.500381	0.792532	0.921284	0.192797	0.506314	0.511178	0.478263	0.317237	0.640436	0.367261	0.464763	0.0897964	0.57521	NaN	NaN
6.09874	0.689574	0.513012	0.322505	0.630145	0.347526		0.328741	0.514926	0.389389	NaN	NaN	NaN	NaN	NaN	NaN	NaN	NaN	0.168175	-0.0346167	0.337175	0.612861	NaN	NaN	0.361785	0.289222	0.499343	0.590045	0.578862	0.397889	0.470991	0.456443	0.449225	0.650617	0.576946	0.682487	0.754023	0.834685	0.483811	0.411304	0.383201	0.552558	0.428565	0.507884	0.478024	0.410151	0.791718	0.709454	NaN	NaN
6.19555	0.659806	0.333487	0.426516	0.470343	0.354533		0.37383	0.515513	0.384644	NaN	NaN	NaN	NaN	NaN	NaN	NaN	NaN	0.143091	0.266038	0.229498	0.401947	NaN	NaN	0.356817	0.256897	0.564716	0.538076	0.518971	0.457202	0.408631	0.480931	0.459725	0.615385	0.578253	0.470082	0.626291	0.725468	0.567884	0.589411	0.344367	0.610826	0.484482	0.536392	0.312926	0.575203	0.307431	0.556274	NaN	NaN
6.29235	0.738599	0.507923	0.460963	0.517376	0.366705		0.376371	0.508141	0.453249	NaN	NaN	NaN	NaN	NaN	NaN	NaN	NaN	0.20496	0.504854	0.7848	0.582988	NaN	NaN	0.300447	0.20912	0.467713	0.44253	0.483954	0.463871	0.360515	0.458042	0.43272	0.671594	0.541229	0.544451	0.757894	0.525662	0.681206	0.475018	0.405315	0.411925	0.231014	0.269922	0.2648	0.52306	0.574727	0.597119	NaN	NaN
6.38916	0.540408	0.658111	0.473395	0.482365	0.346191		0.370991	0.467313	0.529659	NaN	NaN	NaN	NaN	NaN	NaN	NaN	NaN	0.125067	0.401135	0.422529	0.801384	NaN	NaN	0.243067	0.155041	0.342469	0.478586	0.520718	0.458972	0.422623	0.486607	0.445094	0.657478	0.534999	0.667264	0.652066	0.812827	0.688288	0.467321	0.278061	0.507807	0.139808	0.431341	0.496444	0.698275	0.818225	0.44652	NaN	NaN
6.48596	0.598923	0.401601	0.578338	0.446425	0.346695		0.374308	0.435968	0.600557	NaN	NaN	NaN	NaN	NaN	NaN	NaN	NaN	0.17744	0.380175	0.448391	0.829283	NaN	NaN	0.298403	0.248914	0.335509	0.449993	0.541652	0.479055	0.456666	0.518947	0.486627	0.622422	0.422219	0.591397	0.826095	0.632189	0.74775	0.34837	0.509856	0.534885	0.320985	0.305218	0.215925	0.540486	0.580015	0.574824	NaN	NaN
6.58277	0.59299	0.393126	0.779271	0.536614	0.361925		0.350242	0.438018	0.52707	NaN	NaN	NaN	NaN	NaN	NaN	NaN	NaN	0.141948	0.741782	0.136341	0.717697	NaN	NaN	0.353032	0.312059	0.408446	0.424685	0.540649	0.438376	0.412247	0.503217	0.487072	0.611539	0.639004	0.45728	0.692586	0.607536	0.652014	0.434612	0.500317	0.396822	0.389832	0.415801	0.365841	0.350002	0.255436	0.636026	NaN	NaN
6.67957	0.784617	0.606294	0.608733	0.558906	0.326381		0.33453	0.423333	0.458059	NaN	NaN	NaN	NaN	NaN	NaN	NaN	NaN	0.192178	0.186693	0.338051	0.728647	NaN	NaN	0.403815	0.220152	0.42907	0.529384	0.530685	0.470944	0.366346	0.477572	0.448515	0.584457	0.59367	0.666249	0.812969	0.615691	0.54181	0.362799	0.444033	0.382559	0.393379	0.388859	0.556121	0.441611	0.573073	0.645945	NaN	NaN
6.77638	0.758626	0.615689	0.479468	0.602077	0.326132		0.34334	0.43736	0.44231	NaN	NaN	NaN	NaN	NaN	NaN	NaN	NaN	0.161862	0.342519	-0.0528489	0.729369	NaN	NaN	0.415982	0.167833	0.360742	0.663462	0.548413	0.54327	0.391277	0.4471	0.394888	0.494989	0.695922	0.673905	0.785333	0.71968	0.510943	0.442384	0.494996	0.488354	0.30749	0.474979	0.318125	0.498543	0.650518	0.666826	NaN	NaN
6.87318	0.701115	0.573345	0.490129	0.470016	0.338601		0.325888	0.439657	0.390143	NaN	NaN	NaN	NaN	NaN	NaN	NaN	NaN	0.174272	0.219206	0.401937	0.781798	NaN	NaN	0.414829	0.177071	0.308844	0.597218	0.597215	0.62477	0.447169	0.414685	0.367775	0.509261	0.598481	0.699974	0.708662	0.988835	0.706988	0.439409	0.369713	0.394198	0.411469	0.514411	0.307056	0.472389	0.537992	0.476045	NaN	NaN
6.96999	0.85238	0.618536	0.580754	0.539739	0.292617		0.30552	0.411489	0.367688	NaN	NaN	NaN	NaN	NaN	NaN	NaN	NaN	0.191567	0.328558	0.433079	0.661395	NaN	NaN	0.454747	0.242815	0.43753	0.572967	0.612047	0.61727	0.479203	0.398578	0.378788	0.50003	0.508908	0.716297	0.7547	0.642407	0.416571	0.2636	0.464974	0.451365	0.318991	0.406378	0.304441	0.532179	0.522311	0.539683	NaN	NaN
7.0668	0.655357	0.716347	0.518206	0.399464	0.258308		0.319418	0.403974	0.403064	NaN	NaN	NaN	NaN	NaN	NaN	NaN	NaN	0.19342	0.343963	0.788905	0.680549	NaN	NaN	0.458893	0.282322	0.509091	0.523836	0.585008	0.563999	0.50344	0.429774	0.420516	0.444823	0.675396	0.752919	0.5299	0.747872	0.700891	0.3418	0.391422	0.342628	0.499838	0.451365	0.300811	0.36324	0.361789	0.448341	NaN	NaN
7.1636	0.884249	0.588044	0.609806	0.49357	0.311806		0.361163	0.391231	0.444429	NaN	NaN	NaN	NaN	NaN	NaN	NaN	NaN	0.23082	0.718795	0.160715	0.610125	NaN	NaN	0.459833	0.303772	0.448468	0.416039	0.576651	0.543007	0.49777	0.468474	0.455108	0.400369	0.594561	0.776559	0.729744	0.587302	0.724253	0.332544	0.41104	0.43836	0.345823	0.490666	0.302526	0.365243	0.895977	0.600372	NaN	NaN
7.26041	0.860773	0.680256	0.540986	0.566414	0.337659		0.384106	0.348465	0.413956	NaN	NaN	NaN	NaN	NaN	NaN	NaN	NaN	0.177713	0.183902	0.323552	0.464619	NaN	NaN	0.538863	0.269343	0.414604	0.49826	0.624176	0.448091	0.474598	0.442898	0.4297	0.362724	0.659831	0.759171	0.68511	0.68141	0.49254	0.33026	0.33362	0.424522	0.341731	0.306642	0.452115	0.466942	0.182163	0.403031	NaN	NaN
7.35721	0.883484	0.50693	0.441357	0.506573	0.350918		0.388106	0.351957	0.436074	NaN	NaN	NaN	NaN	NaN	NaN	NaN	NaN	0.109859	-0.0452803	0.163002	0.649239	NaN	NaN	0.526796	0.250831	0.351563	0.567172	0.607003	0.360771	0.441372	0.412298	0.411431	0.453576	0.653578	0.754569	1.0031	1.00515	0.947433	0.2512	0.446658	0.408988	0.45359	0.235198	0.354004	0.401742	0.255382	0.449611	NaN	NaN
7.45402	0.84666	0.669666	0.613609	0.431548	0.342758		0.364141	0.381517	0.490793	NaN	NaN	NaN	NaN	NaN	NaN	NaN	NaN	0.120439	0.188995	0.151415	0.578634	NaN	NaN	0.477056	0.192123	0.375701	0.499577	0.5368	0.402336	0.478191	0.374882	0.378596	0.477807	0.66473	0.67161	0.970654	0.732444	0.568079	0.370834	0.330452	0.419647	0.525028	0.292098	0.441672	0.536207	0.39245	0.398304	NaN	NaN
7.55082	1.02909	0.5325	0.650135	0.568352	0.332109		0.325056	0.387477	0.504931	NaN	NaN	NaN	NaN	NaN	NaN	NaN	NaN	0.113892	0.435365	0.0755031	0.445641	NaN	NaN	0.487373	0.149639	0.496914	0.415345	0.507741	0.484031	0.461424	0.410779	0.411707	0.488055	0.536335	0.838986	0.745169	0.858402	0.772149	0.425802	0.473861	0.433667	0.506654	0.335391	0.357993	0.513224	0.538032	0.390453	NaN	NaN
7.64763	0.876103	0.662648	0.659034	0.520738	0.329461		0.304058	0.335833	0.496179	NaN	NaN	NaN	NaN	NaN	NaN	NaN	NaN	0.186523	0.328661	0.309108	0.554049	NaN	NaN	0.458207	0.243423	0.522395	0.460172	0.501751	0.455622	0.385071	0.394766	0.393921	0.420557	0.589849	0.722991	0.815741	0.694929	0.812982	0.505237	0.41324	0.383031	0.511078	0.390289	0.406295	0.41301	0.311733	0.306073	NaN	NaN
7.74443	0.830617	0.660568	0.623135	0.542022	0.357035		0.272984	0.278369	0.417464	NaN	NaN	NaN	NaN	NaN	NaN	NaN	NaN	0.11825	0.493711	0.174303	0.560432	NaN	NaN	0.466217	0.263419	0.517236	0.466448	0.481891	0.457799	0.414614	0.383036	0.389531	0.47809	0.699988	0.464982	1.03002	1.05228	0.571597	0.461171	0.386633	0.386771	0.576803	0.401904	0.465838	0.433534	0.254042	0.371949	NaN	NaN
7.84124	0.757791	0.941982	0.642633	0.550295	0.385378		0.251083	0.311362	0.415461	NaN	NaN	NaN	NaN	NaN	NaN	NaN	NaN	0.107606	0.48059	0.212275	0.470399	NaN	NaN	0.41881	0.241961	0.401402	0.455893	0.424523	0.458239	0.385881	0.466139	0.455705	0.371572	0.595909	0.640962	0.776959	0.830544	0.745447	0.460235	0.342782	0.423909	0.475172	0.412873	0.445483	0.49438	0.459751	0.369042	NaN	NaN
7.93804	0.81242	0.699299	0.643314	0.460636	0.346505		0.271994	0.359786	0.3697	NaN	NaN	NaN	NaN	NaN	NaN	NaN	NaN	0.155545	0.015795	0.328444	0.466722	NaN	NaN	0.428669	0.232539	0.451706	0.502418	0.41999	0.368137	0.344071	0.422081	0.406988	0.347207	0.732687	0.662839	0.788967	0.779493	0.659802	0.363727	0.382381	0.330143	0.308715	0.295777	0.344168	0.505547	0.272487	0.448615	NaN	NaN
8.03485	0.886329	0.82719	0.609252	0.508198	0.289943		0.306506	0.331733	0.295669	NaN	NaN	NaN	NaN	NaN	NaN	NaN	NaN	0.12566	0.547827	0.214168	0.397656	NaN	NaN	0.463479	0.246073	0.458199	0.474315	0.419882	0.380295	0.387884	0.347963	0.340721	0.357563	0.718814	0.648303	0.720686	0.682527	0.817351	0.366135	0.336531	0.454902	0.50989	0.471794	0.346049	0.37176	0.604601	0.281072	NaN	NaN
8.13166	0.700522	0.698082	0.619399	0.336655	0.321365		0.311497	0.2956	0.309206	NaN	NaN	NaN	NaN	NaN	NaN	NaN	NaN	0.109539	0.422131	0.262119	0.391438	NaN	NaN	0.380715	0.273803	0.426674	0.338354	0.381361	0.404308	0.406323	0.361743	0.364654	0.414685	0.540526	0.515634	0.980844	0.714473	0.690352	0.452906	0.293597	0.490472	0.484515	0.392266	0.471807	0.398296	0.493022	0.409565	NaN	NaN
[truncated: 44 more columns]

## Sheet: supp3ciii
Supp fig 3 c.iii.	motion initaition aligned F
	VTA GCamp6s axons				LC GCamp6s axons
	slope	R-squared			slope	R-squared
roi 1	-0.232696	0.836282		roi 1	0.0301633	0.487047
roi 2	-0.141455	0.645931		roi 2	0.111011	0.690778
roi 3	-0.0661348	0.256793		roi 3	0.0396603	0.429264
roi 4	-0.0607931	0.253768		roi 4	0	NaN
roi 5	-0.00166565	0.00110737		roi 5	0	NaN
					0	NaN
					0	NaN
					0	NaN
					0	NaN
					0	NaN
					0	NaN
					0.0534844	0.35805
					0.192901	0.375196
					-0.043166	0.0301482
					-0.108402	0.784926
					0	NaN
					0	NaN
					0.0482241	0.212871
					0.0692538	0.282316
					-0.0249305	0.0594595
					0.0522811	0.225662
					0.0750383	0.496819
					-0.0173262	0.0446911
					0.113154	0.528165
					0.0622992	0.475941
					0.0644829	0.501933
					-0.00832101	0.00767675
					0.117138	0.487509
					0.0956202	0.244832
					0.15775	0.445625
					0.0975739	0.18324
					0.135214	0.31385
					0.098601	0.421703
					0.0582381	0.188569
					0.088129	0.453523
					0.00165439	0.000128812
					0.141749	0.493805
					0.0399713	0.158751
					0.0912567	0.338128
					0.159164	0.482625
					0.203125	0.687162
					0	NaN
					0	NaN
					0.0535931	0.254052
					0.113608	0.503936
					-0.01761	0.0206037
					0.0554834	0.268803
					0.104312	0.462289
					0.102323	0.223512
					0.135924	0.70836
					0.0979569	0.532921
					0.101503	0.537421
					0.0777035	0.323086
					0.1098	0.636052
					-8.7351e-05	1.58129e-07
					0.118038	0.30978
					-0.0375973	0.0267152
					0.130845	0.203074
					0.0613403	0.294247
					0.0209812	0.0383174
					0.0434157	0.164051
					0.0644677	0.281009
					0.0610066	0.539326
					0.0642791	0.367779
					0.12323	0.738158
					0.0594033	0.469287
					0.0307709	0.247162
					-0.00161642	0.00109679
					0.0528454	0.382234
					0.0869619	0.541071
					0.0801217	0.621611
					0.110177	0.625535
					0.110345	0.651775
					0.0480816	0.160584
					0.0736941	0.211809
					0.12663	0.412016
					0.100647	0.241953
					0.155258	0.469344
					0.13188	0.429893
					0.0641214	0.0886315
					0.0232065	0.013512
					0.0615746	0.10979
					0.0866685	0.102641
					-0.00807078	0.00221609
					0.0686301	0.106798
					0.0421726	0.0733013
					0.142221	0.643967
