# Supplementary material for: Distinct catecholaminergic pathways projecting to hippocampal CA1 transmit contrasting signals during navigation in familiar and novel environments
Source: eLife. 2024 Nov 6;13:RP95213. doi: 10.7554/eLife.95213 (PMC11540301; doi:10.7554/eLife.95213)
Supplement: Figure 1—source data 1. [file elife-95213-fig1-data1.xlsx]

## Sheet: 1Ei
Figure 1 E.i.
	VTA axon binned F												LC axon binned F
bin	lap 1	lap 2	lap 3	lap 4	lap 5	lap 6	lap 7	lap 8	lap 9	lap 10			lap 1	lap 2	lap 3	lap 4	lap 5	lap 6	lap 7	lap 8	lap 9	lap 10	lap 11	lap 12	lap 13	lap 14	lap 15	lap 16	lap 17	lap 18	lap 19	lap 20	lap 21	lap 22	lap 23
1	NaN	0.245797	0.295765	0.259938	0.251086	0.402122	0.211107	0.204	0.44283	0.361547			0.177337	0.176924	0.130855	0.155517	0.14056	0.163963	0.139383	0.149207	0.178391	0.174278	0.108987	0.171371	0.107466	0.129376	0.180492	0.119057	0.157787	0.182565	0.137426	0.165236	0.144988	0.109414	0.0996329
2	NaN	0.170022	0.221498	0.259944	0.228615	0.414649	0.196369	0.206075	0.374785	0.173237			0.543097	0.355675	0.32634	0.443935	0.193251	0.560561	0.314649	0.381721	0.375306	0.351931	0.318327	0.289888	0.458661	0.227394	0.48005	0.383416	0.132413	0.479487	0.445521	0.334856	0.558964	0.343337	0.147306
3	NaN	0.179688	0.262829	0.229207	0.292333	0.28084	0.210401	0.254221	0.255203	0.258234			0.32284	0.569575	0.392031	0.531828	0.400005	0.51795	0.505581	0.440212	0.39862	0.560321	0.382955	0.354232	0.565172	0.359556	0.385412	0.362924	0.411332	0.483016	0.439796	0.431765	0.459096	0.414359	0.249614
4	NaN	0.16781	0.325119	0.17216	0.105418	0.436374	0.107292	0.242711	0.287812	0.217663			0.420463	0.558799	0.42222	0.489845	0.470469	0.550948	0.599056	0.533319	0.575101	0.622808	0.563242	0.382565	0.647601	0.419518	0.476935	0.349126	0.476407	0.643741	0.400775	0.53589	0.447006	0.515162	0.265166
5	NaN	0.117864	0.148954	0.220904	0.140645	0.239857	0.212347	0.186714	0.269342	0.179898			0.549314	0.561444	0.489219	0.504195	0.577869	0.728273	0.542569	0.68759	0.586105	0.654711	0.687987	0.433557	0.488677	0.520277	0.510024	NaN	0.40929	NaN	0.437871	0.658399	NaN	0.599889	0.290569
6	NaN	0.0689748	0.185107	0.183291	0.228854	0.24791	0.127582	0.23282	0.170373	0.16447			0.657213	0.555902	0.457178	0.661233	0.603324	NaN	0.411102	0.595534	0.514371	0.677424	0.701647	0.477673	0.488935	0.581391	0.501028	0.383591	0.431007	0.777954	0.461608	0.743346	0.479617	0.602146	0.319027
7	NaN	0.00350024	0.18632	0.127313	0.0942971	0.0899424	0.136244	0.106275	0.210517	0.132171			0.764202	0.527896	0.432992	0.623888	0.586135	0.815961	0.450754	0.576482	0.549317	0.585429	0.56901	0.481796	0.807558	0.491147	0.467931	0.351812	0.630393	0.859146	0.478665	0.809511	0.497669	0.114144	NaN
8	NaN	0.243166	NaN	0.168848	0.300736	0.0911802	0.132314	0.257535	0.182308	0.151032			0.710422	0.562146	0.424514	0.586417	0.70884	0.750086	0.493094	NaN	0.568862	NaN	0.363224	0.465922	NaN	0.654646	0.476389	0.373784	NaN	NaN	NaN	0.68786	0.521366	0.590562	0.349013
9	NaN	0.136339	0.0715066	0.196679	0.168634	0.195429	0.0559204	0.147885	0.191293	0.0912034			0.538571	0.627524	0.66054	0.548694	0.767949	0.700936	0.540812	0.70344	0.557604	0.43608	0.569288	0.531986	0.83283	0.748897	0.567959	NaN	0.752526	0.769078	0.471468	NaN	0.473241	0.551295	0.292256
10	NaN	0.169551	0.0921925	0.194821	0.122815	0.261778	0.178642	0.104911	0.145116	0.0157105			0.604018	0.603649	1.01882	0.614685	0.699864	0.685235	NaN	0.706699	NaN	0.420344	0.652149	NaN	0.711428	0.704651	0.621822	0.503259	0.836032	0.593381	0.462722	0.580945	0.389205	0.513804	0.248348
11	NaN	0.125653	0.178655	0.0547785	0.156393	0.0753551	0.087679	0.21572	0.248967	0.0587742			0.61833	0.593007	0.929943	0.732533	NaN	0.715461	0.552985	0.648109	0.505389	0.408072	0.488604	0.484001	0.600557	0.650999	NaN	0.550721	NaN	0.678032	0.299459	0.503501	NaN	NaN	0.230139
12	0.177347	NaN	NaN	NaN	0.121664	0.175582	0.114159	0.261842	0.102656	0.039272			0.607891	0.608831	0.793672	0.646113	0.673388	0.842564	0.547385	0.575999	0.432694	0.402729	0.454662	0.387044	0.540427	0.592644	0.65683	NaN	0.727372	NaN	0.557467	NaN	0.531514	0.477202	0.337234
13	0.0709659	0.0924635	0.152541	0.207016	0.0558584	0.112884	0.328907	0.153296	0.235931	0.218219			0.596254	0.612214	0.562609	0.587965	0.689636	0.928273	0.623946	0.538489	0.425597	0.410303	0.485521	0.267075	NaN	0.62813	0.427381	0.557176	0.654636	0.711097	NaN	0.565963	0.617493	0.531679	0.50698
14	0.211784	0.0738674	0.130411	0.155855	NaN	0.142212	0.0941336	0.0777306	0.111832	0.0972069			0.869597	0.617672	0.546981	0.58636	0.783461	0.668008	0.63458	0.570181	0.475987	0.456738	0.410936	0.492462	0.594766	0.645125	0.333105	0.517551	0.653747	0.640993	0.723272	0.698379	0.590817	0.567075	0.344332
15	0.146631	0.0770009	0.202302	0.164492	0.0986108	0.155323	0.134568	NaN	NaN	NaN			0.802072	0.641847	0.484024	0.637718	0.849542	0.604079	0.513362	0.576199	0.408145	0.498483	0.305985	0.486144	0.626026	0.607097	0.509172	0.513169	0.593827	0.623272	0.520554	0.581338	0.457168	0.550869	0.245268
16	0.142279	0.153964	0.170677	0.134845	0.0854199	0.199268	0.071907	0.0630317	0.150821	0.0553061			0.635815	0.634522	0.564448	0.667262	0.508012	0.614972	0.539637	0.560038	0.30891	0.372988	0.631753	0.422005	0.4568	0.574817	0.473666	0.579273	0.504392	0.631742	0.463544	0.487297	0.240067	0.498496	0.273373
17	0.316599	0.0872531	0.0822372	0.0468363	0.0540832	0.0196323	0.154289	0.16792	0.152509	0.0880324			0.557432	0.623808	0.501297	0.703524	0.564576	0.525007	0.542422	0.582913	0.512805	0.371063	0.593512	0.442536	0.477092	0.650381	0.350477	0.48027	0.50576	0.544854	0.469629	0.4542	0.437033	0.397114	0.291322
18	0.262975	0.113467	-0.00369508	0.00786428	0.0625073	0.137145	0.0829975	0.167623	0.146049	0.149844			0.781433	0.677408	0.567974	0.538593	0.536233	0.691699	0.451468	0.604849	0.323347	0.400256	0.572216	0.576813	0.635862	0.619085	0.482325	0.539034	0.408742	0.468197	0.644274	0.401662	0.545526	0.590839	0.244625
19	0.270949	0.151043	0.052297	0.108002	0.072543	0.114386	0.150046	0.0402986	0.112101	0.0785712			0.748731	0.885834	0.646079	0.751992	0.737211	0.726699	0.660907	0.625986	0.479166	0.466087	0.475895	0.620541	0.622751	0.557515	0.429335	0.533365	0.634108	0.508991	0.566543	0.528055	0.568189	0.543159	0.48602
20	0.203865	0.11358	0.183578	0.0381614	0.155605	0.0748514	0.0817265	0.111634	0.177918	0.0699548			0.879636	0.838438	0.702294	0.786608	0.817209	0.816385	0.684006	0.501061	0.542641	0.562483	0.56071	0.596926	0.647522	0.651057	0.607234	0.596705	0.669124	0.434315	0.753685	0.577953	0.668617	0.596797	0.416398
21	0.382831	0.103793	0.0844778	0.07712	0.0749747	0.206169	0.0669806	0.150181	0.236325	0.191495			0.897207	0.78683	0.702316	0.763016	NaN	0.798982	0.584516	0.614123	0.561138	0.620105	0.565733	0.640635	NaN	0.640815	NaN	0.589876	0.739088	0.628848	NaN	0.636231	0.77801	0.710706	0.452511
22	0.261717	0.130112	0.122937	0.0996013	0.232876	0.13628	0.101339	0.0467655	0.104369	0.0750077			0.8455	0.806678	0.837944	NaN	1.01396	0.529062	0.532323	0.651493	0.548374	0.507455	NaN	0.629856	0.694427	0.617914	0.655687	0.519311	NaN	0.771971	0.924473	NaN	0.729557	0.653373	NaN
23	0.353948	0.0991463	0.146331	0.049752	0.179725	0.192529	0.0278914	0.069491	0.216496	0.140186			0.897401	0.827342	1.04138	0.855523	0.740057	NaN	NaN	0.537481	NaN	0.309669	0.623237	0.591834	0.719454	NaN	0.653005	NaN	0.84906	NaN	0.790458	0.711273	0.687363	NaN	0.497745
24	0.251545	0.147589	0.0445198	0.0865834	0.203521	0.183227	0.221688	0.178941	0.0595442	0.158453			1.00111	NaN	NaN	0.815494	NaN	0.378793	0.57472	NaN	0.523618	NaN	0.543235	NaN	NaN	0.567141	NaN	0.577812	NaN	0.88939	NaN	0.659152	NaN	0.586579	0.559762
25	0.353472	-0.0042437	0.0987686	0.102339	0.219997	0.138096	0.352363	0.153666	0.202745	0.196868			0.983251	0.849639	0.745727	NaN	0.603594	0.467825	0.564808	0.533264	0.47488	0.480206	NaN	0.551043	0.700726	0.517514	0.613809	NaN	0.980574	NaN	0.721918	NaN	0.657688	0.500862	NaN
26	0.317632	0.100564	0.130396	0.0305259	0.281672	0.141073	0.219697	0.276377	0.119945	0.213089			0.999032	0.89998	NaN	0.709198	0.742001	NaN	NaN	NaN	0.409143	0.560005	0.394481	NaN	NaN	NaN	NaN	0.700848	1.07195	0.754122	NaN	0.543449	0.651686	NaN	0.63017
27	0.323674	0.170569	0.141016	0.0904098	0.335747	0.0644069	0.115952	0.197278	0.132593	0.081337			NaN	NaN	0.574136	NaN	NaN	0.591449	0.528739	0.583944	0.394645	NaN	0.592669	0.597555	0.780753	0.468458	0.626901	0.815975	NaN	NaN	0.648695	NaN	0.657519	0.604059	NaN
28	0.487812	0.133551	0.0820768	0.0735322	0.357582	0.189429	0.141141	0.25308	0.0709228	0.330457			1.08209	0.964342	NaN	0.691044	0.665314	NaN	NaN	0.610437	0.514553	0.458332	NaN	0.818673	0.910158	0.506008	0.744571	NaN	1.08307	0.653316	NaN	0.501575	NaN	0.801714	0.521274
29	0.414228	0.187299	0.107732	0.0977412	0.221824	0.15676	0.165796	0.133909	0.213475	0.149299			1.066	NaN	0.650661	0.708843	0.481079	0.73237	0.631188	NaN	0.4561	0.468977	0.67746	NaN	NaN	NaN	NaN	0.820109	NaN	0.621431	0.566108	0.494788	0.729439	NaN	NaN
30	0.531755	0.224552	0.118465	0.0752153	0.308752	0.0610925	0.200112	0.291399	0.303547	0.0693551			NaN	0.844938	0.705378	NaN	NaN	0.673188	0.694905	0.627762	0.499846	NaN	NaN	0.808403	0.724756	0.50642	0.790604	NaN	0.881707	NaN	NaN	NaN	NaN	0.680713	NaN
31	0.542206	0.164335	0.143995	0.122632	0.222208	0.0279536	0.186905	0.219018	NaN	0.17045			1.00033	0.710132	0.749189	0.798546	0.579214	NaN	0.681162	0.626754	0.594693	0.53578	0.535455	0.682439	0.660661	0.432559	0.80082	0.602259	NaN	0.540681	0.800737	0.558177	0.750149	NaN	NaN
32	0.497636	0.124567	0.0845594	0.214338	0.298979	0.234139	0.279076	0.316788	0.21799	0.183034			0.821349	NaN	NaN	0.81227	0.624139	0.641772	NaN	NaN	0.489229	NaN	0.450071	0.600249	NaN	0.492031	0.664154	0.507988	0.574105	NaN	1.19397	0.598729	0.668439	0.604283	NaN
33	0.473468	0.196622	0.199592	NaN	0.412452	0.177121	0.10962	0.443396	0.281196	0.148885			NaN	0.544524	0.680535	NaN	NaN	0.665884	0.595028	0.615267	0.441666	0.613699	0.392998	NaN	0.839181	0.618169	NaN	NaN	0.495665	0.435499	0.947255	NaN	NaN	NaN	NaN
34	0.654695	NaN	0.294682	0.0708236	0.411872	0.0973612	0.131144	0.435229	0.431586	0.0555192			0.752646	0.553055	0.642996	0.788004	0.562643	0.714726	0.472697	0.59854	0.509906	0.635929	NaN	0.569513	0.813432	NaN	0.599141	0.475507	NaN	NaN	NaN	0.627864	0.65921	0.616997	NaN
35	0.624605	0.250917	0.192397	0.156498	0.20562	0.273106	NaN	0.352099	0.236772	0.132052			0.905788	0.648654	0.667688	0.623655	0.610952	0.775932	0.605692	0.542287	NaN	0.546785	0.749561	0.641685	NaN	0.453757	0.677433	NaN	0.472929	0.722841	0.815692	0.610627	0.686221	0.554136	NaN
36	NaN	0.203736	NaN	0.0849779	NaN	0.236235	0.247846	0.385592	NaN	0.213767			0.835022	0.787462	0.654798	0.500377	0.714164	NaN	NaN	NaN	0.499957	0.497238	0.891951	0.675013	0.685549	0.393264	0.641861	0.703683	0.561605	0.876276	NaN	NaN	NaN	0.453488	NaN
37	0.294084	0.123762	0.245773	0.442671	0.643068	0.494142	0.259335	0.332443	0.312293	NaN			0.859087	0.813039	0.623117	0.459241	0.566947	0.742937	0.709601	0.508091	0.521539	0.467491	0.605993	0.688919	0.569282	0.540609	NaN	0.822949	0.710427	0.761898	0.914439	0.584979	0.603799	0.449639	NaN
38	0.921675	NaN	0.286707	NaN	0.567205	NaN	0.388437	0.30372	0.366485	0.220556			0.785264	0.646408	0.571114	0.430105	0.599641	0.724244	0.755338	0.518008	0.64716	0.428012	NaN	0.731481	0.433574	0.496693	0.549355	0.831341	NaN	NaN	0.702304	0.542508	0.561155	NaN	NaN
39	0.273291	0.370398	0.1904	0.36623	0.432983	0.379068	0.198823	0.745073	0.320404	0.382675			0.590575	0.883851	0.575592	0.529126	0.723993	0.695162	0.641611	0.48824	0.503051	0.435471	0.544876	0.734289	0.352376	0.357146	0.683638	0.819876	0.751646	0.71007	0.334728	0.455388	0.570948	0.579045	NaN
40	NaN	0.540822	0.200336	0.26685	0.462476	0.705076	0.353474	0.493939	NaN	0.379468			0.665517	0.64589	0.693681	0.539699	0.474508	0.577431	0.425455	0.7291	0.40701	0.485897	0.596179	0.546283	0.461088	0.421625	0.585028	0.716515	0.417492	0.632601	0.450971	0.436226	0.444013	0.723401	NaN
41	0.636156	0.416305	0.331987	0.339708	0.742198	0.920684	0.351297	0.460268	0.243952	0.304301			0.520308	0.584613	0.640931	0.539093	0.585789	0.470076	0.462684	0.621858	0.318018	0.489712	0.618321	0.424153	0.464554	0.539803	0.577633	0.754765	0.533085	0.477553	0.557248	0.498743	0.65528	0.605222	NaN
42	0.586375	NaN	0.136876	0.392252	0.415192	0.755649	0.564249	0.526201	0.601109	0.278604			0.592931	0.753307	0.666109	0.704859	0.542278	0.396503	0.462691	0.634098	0.522664	0.411635	0.591809	0.722229	0.393751	0.371925	0.419273	0.766123	0.412303	0.590342	0.599492	0.719782	0.535678	0.535142	NaN
43	0.714452	0.531189	0.300972	0.337103	0.522826	0.603497	0.315989	0.690046	0.539102	0.31616			0.791997	0.668046	0.622916	0.91122	0.583232	0.627331	0.375511	0.702523	0.543491	0.414879	0.554413	0.574302	0.409361	0.595404	0.551071	0.764035	0.473874	0.668182	0.520716	0.52473	0.478592	0.47206	NaN
44	0.747118	0.561003	0.239452	0.464425	0.683311	0.703315	0.3331	0.631289	0.471423	0.417127			0.746616	0.607917	0.628248	0.808502	NaN	0.65854	0.356622	0.568671	0.491801	0.418321	0.519979	0.50987	0.205726	0.52626	0.589457	NaN	0.73878	0.651528	0.45666	0.542217	0.345305	0.546591	NaN
45	0.9472	0.688968	0.300599	0.461941	0.728258	0.88314	0.374444	0.936114	0.387668	0.459898			0.687383	0.652632	0.66019	NaN	0.619835	0.707109	0.379116	0.518226	0.408769	0.42216	0.380003	0.648149	0.381831	NaN	NaN	0.778949	0.651036	0.602787	0.448219	0.665973	0.459084	0.585273	NaN
46	0.898828	0.591022	0.408812	0.603516	0.838943	0.647184	0.40407	0.782757	0.435008	0.24484			NaN	0.746186	NaN	0.678883	0.662404	0.758219	0.427337	0.634598	0.381428	0.346369	NaN	NaN	0.391385	0.492763	0.599709	0.832791	NaN	0.643198	NaN	NaN	NaN	NaN	NaN
47	0.521278	0.575221	0.696526	0.551998	0.656401	0.576785	0.193594	0.764754	0.512338	0.806751			0.600448	NaN	0.804698	0.535813	NaN	NaN	NaN	NaN	NaN	0.230763	0.458333	0.638145	0.451794	0.623663	0.650117	0.964485	0.631884	NaN	0.496256	0.704735	0.510481	0.60603	NaN
48	1.03767	0.590181	0.471719	0.500064	0.718652	0.767023	0.457043	0.783247	0.297879	0.646122			0.64786	0.864159	0.822301	NaN	0.595996	0.814413	0.527012	0.665011	0.465466	NaN	0.521352	0.554	0.551083	0.623911	NaN	0.91132	0.749916	0.637918	0.657249	0.749875	0.437112	0.584359	NaN
49	0.849189	0.642135	0.608202	0.335415	0.87369	0.553955	0.282214	0.574681	0.287063	0.711906			0.762446	0.910137	NaN	0.682488	0.475101	0.705774	0.642573	NaN	0.529602	0.415876	NaN	NaN	0.529376	0.558832	0.639884	0.765725	0.810883	NaN	NaN	NaN	0.422654	0.566334	NaN
50	0.844825	0.590596	0.347851	0.487013	0.661797	0.700118	0.47203	0.743795	0.334887	0.945313			0.815035	0.936385	0.586091	0.736947	0.508216	0.514719	NaN	0.652444	NaN	0.528625	0.553749	0.483094	0.535255	0.466109	0.508369	0.790051	NaN	0.541255	0.561223	0.807769	NaN	NaN	NaN
51	0.96871	0.967135	0.557954	0.276852	0.630645	0.76398	0.207315	0.782582	0.53602	0.842617			NaN	NaN	0.55762	0.606974	0.573422	NaN	0.766075	0.765412	0.583787	NaN	0.455614	0.474943	0.524211	0.429439	0.453191	0.799513	0.843317	0.499578	0.336687	0.740179	0.437653	0.555602	NaN
52	0.861735	0.9223	0.509603	0.397416	0.92789	0.763366	0.564222	1.09426	0.600086	0.380415			0.796404	0.923174	0.633019	0.660068	0.702812	0.581959	0.565745	0.794198	0.675337	0.496649	0.292213	0.592302	0.475248	0.547492	0.436183	0.779248	0.767618	NaN	NaN	0.609849	0.515728	0.726024	NaN
53	1.06183	0.725562	0.730167	0.584174	0.73573	0.834959	0.66175	0.646976	0.770624	0.402649			0.635332	0.821431	0.686451	NaN	0.707618	0.597276	0.428641	0.654619	0.638799	0.4716	NaN	0.676965	0.471159	0.591244	0.488045	0.717923	0.67405	0.485393	0.571758	0.549912	0.542366	0.987021	NaN
54	0.859719	0.886971	0.559198	0.74398	0.653786	0.864529	0.385972	0.758368	0.783564	0.918423			0.500893	0.760019	0.672135	0.757106	0.650132	0.508744	0.417989	0.364679	0.346089	0.450013	0.525264	0.74528	0.593644	0.629512	0.499449	0.682188	NaN	0.517794	0.668973	0.489726	0.466126	0.611228	NaN
55	0.990476	0.994272	0.832994	0.516765	0.746996	1.0468	0.805053	0.833917	0.784036	0.650851			0.512225	0.919834	0.577902	0.653392	0.595266	0.41766	0.502812	0.576266	0.315472	0.348156	0.638137	0.456312	0.591226	0.381264	0.409366	0.728262	0.544744	0.562432	0.496313	0.429042	0.481012	0.442492	NaN
56	1.06564	1.27306	0.847337	0.558125	0.784862	1.07769	0.76906	0.726051	0.894823	0.859881			0.530029	0.770906	0.491101	0.656776	0.462521	0.398362	0.573183	0.545948	0.415902	0.270366	0.523352	0.422275	0.531962	0.435594	0.361837	0.493798	0.487442	0.631543	0.608897	0.423998	0.507316	0.640519	NaN
57	0.868614	1.12972	1.07734	0.473486	0.788814	0.941677	0.772469	0.586763	1.03414	0.832959			0.483974	0.585958	0.411516	0.517634	0.526794	0.444667	0.451146	0.419651	0.46369	0.293235	0.326902	0.319705	0.594168	0.387798	0.384703	0.574178	0.440104	0.535425	0.629958	0.446774	0.413142	0.353523	NaN
58	0.857703	0.976449	0.918291	0.752226	0.940948	1.15009	0.70723	1.09512	0.921191	0.752824			0.626018	0.583059	0.414784	0.463437	0.609634	0.301524	0.469554	0.523047	0.375121	0.492228	0.375723	0.325349	0.450966	0.376408	0.424507	0.581996	0.447066	0.361558	0.584723	0.200011	0.406179	0.469868	NaN
59	1.04297	1.05542	0.91707	1.00758	0.943726	0.927127	0.670562	1.03855	1.11548	0.668148			0.374789	0.350907	0.51153	0.513322	0.391405	0.191089	0.293021	0.425268	0.380845	0.304004	0.492434	0.21468	0.418292	0.286538	0.224787	0.515322	0.494696	0.360803	0.467167	0.286731	0.463631	0.434507	NaN
60	0.676803	0.624176	0.643213	0.569686	0.677532	0.61541	0.594035	0.76326	0.635963	0.510822			0.359411	0.316505	0.296177	0.298769	0.251161	0.240173	0.268144	0.250595	0.25105	0.220625	0.331269	0.235036	0.253084	0.235763	0.219426	0.340082	0.344875	0.308528	0.315888	0.230707	0.308349	0.299331	NaN

## Sheet: 1Eii
Figure 1Eii
	VTA axon mean F										LC axon mean F
bin number	1	2	3	4	5	6	7	8	9		1	2	3	4	5	6	7	8	9	10	11	12	13	14	15	16	17	18	19	20	21	22	23	24	25	26	27	28	29	30	31	32	33	34	35	36	37	38	39
1	0.357404	0.22932	0.297132	0.24796	0.403363	0.440875	0.444129	0.451742	0.428246		0.328924	0.147835	0.297255	0.466711	0.404957	0.355473	0.369363	0.375821	0.372872	0.393775	0.393453	0.26422	0.359987	0.347678	0.368167	0.263891	0.18672	0.341496	0.380632	0.365306	0.422156	0.326106	0.383886	0.283182	0.40516	0.388628	0.285545	0.391038	0.358467	0.324716	0.347897	0.339252	0.362412	0.333252	0.357058	0.523987	0.391352	0.414496	0.393547
2	0.336155	0.24099	0.249466	0.250907	0.363101	0.390168	0.419237	0.268592	0.388652		0.368928	0.367221	0.372862	0.502373	0.608318	0.474457	0.457645	0.452421	0.481637	0.518875	0.519964	0.349788	0.435679	0.363223	0.441422	0.310237	0.336084	0.440055	0.401143	0.406797	0.416236	0.43236	0.349032	0.457857	0.550871	0.526993	0.386009	0.600252	0.566755	0.629066	0.597835	0.611159	0.590484	0.436947	0.540756	0.525317	0.684554	0.442342	0.566964
3	0.344652	0.246574	0.246995	0.244136	0.35657	0.416204	0.422026	0.283662	0.374077		0.392036	0.432095	0.395619	0.592223	0.570567	0.598684	0.564462	0.540879	0.562359	0.520826	0.489708	0.461335	0.469381	0.434042	0.482568	0.48967	0.422615	0.423117	0.391415	0.413774	0.40941	0.448698	0.34421	0.492525	0.458436	0.471867	0.389267	0.570808	0.608129	0.656787	0.667764	0.596315	0.56314	0.441439	0.55387	0.497469	0.664239	0.410094	0.527871
4	0.35006	0.294597	0.229151	0.234744	0.385867	0.343809	0.441984	0.306382	0.390524		0.387259	0.494181	0.431211	0.526343	0.637034	0.614043	0.451696	0.624484	0.575457	0.533967	0.591679	0.492911	0.669466	0.386034	0.481561	0.350775	0.489596	0.452562	0.354221	0.439754	0.487287	0.472399	0.33414	0.463684	0.478393	0.453752	0.406945	0.599543	0.652808	0.733464	0.672566	0.620425	0.639935	0.472028	0.501582	0.382312	0.649875	0.478263	0.627793
5	0.332776	0.307126	0.190725	0.25376	0.397902	0.348719	0.426981	0.300557	0.384215		0.40559	0.545891	0.477725	0.495608	0.589709	0.600283	0.564553	0.523989	0.676884	0.61061	0.457163	0.509404	0.565758	0.522014	0.431917	0.409645	0.448654	0.415803	0.326382	0.459515	0.378524	0.425684	0.321349	0.489564	0.531673	0.518682	0.415577	0.550008	0.617792	0.735887	0.696524	0.642189	0.623228	0.451393	0.619573	0.423955	0.599855	0.489858	0.547415
6	0.333902	0.313613	0.17882	0.248613	0.407282	0.394514	0.43914	0.24087	0.313518		0.399571	0.549193	0.44037	0.577198	0.616376	0.625381	0.539344	0.662676	0.669584	0.582346	0.472192	0.533	0.58727	0.475874	0.488667	0.501275	0.528524	0.363724	0.381772	0.488115	0.400529	0.441538	0.345892	0.49029	0.531466	0.535029	0.406203	0.592565	0.684891	0.834681	0.756834	0.664111	0.645612	0.459336	0.646328	0.312823	0.678801	0.414576	0.646708
7	0.333674	0.298467	0.120731	0.249547	0.394526	0.449456	0.467685	0.209936	0.282784		0.411286	0.566902	0.527951	0.532516	0.556807	0.645915	0.568613	0.509594	0.601257	0.487885	0.382178	0.521576	0.632894	0.47185	0.454098	0.509833	0.543544	0.375537	0.316074	0.493523	0.410576	0.561214	0.393231	0.461765	0.592458	0.570678	0.440544	0.638338	0.706594	0.804716	0.700566	0.58061	0.617272	0.442161	0.666175	0.282527	0.677092	0.480456	0.564724
8	0.345385	0.336114	0.19089	0.228151	0.417398	0.367736	0.434074	0.337846	0.255662		0.446765	0.546303	0.523307	0.449159	0.576947	0.647343	0.568473	0.705212	0.643342	0.448633	0.618683	0.496934	0.517309	0.426218	0.39313	0.536894	0.4843	0.341481	0.321363	0.463385	0.518251	0.548076	0.414881	0.500115	0.467292	0.454574	0.436511	0.576562	0.732647	0.836958	0.771274	0.623251	0.669929	0.418376	0.692221	0.367961	0.687189	0.538941	0.560304
9	0.337534	0.338371	0.139432	0.249283	0.425791	0.411536	0.453655	0.341237	0.361188		0.425393	0.602046	0.491131	0.488458	0.744485	0.474705	0.479901	0.490992	0.463156	0.449614	0.458539	0.503868	0.609014	0.482768	0.388344	0.367628	0.581171	0.296127	0.330962	0.483205	0.441612	0.525953	0.392742	0.486737	0.481372	0.443764	0.438091	0.585454	0.707902	0.846361	0.682007	0.647667	0.67023	0.41492	0.69806	0.420113	0.686083	0.463186	0.618743
10	0.339518	0.379038	0.142838	0.240682	0.388478	0.403763	0.410838	0.222548	0.301944		0.444611	0.608553	0.472685	0.500037	0.596165	0.679926	0.464238	0.460004	0.727011	0.498556	0.634532	0.512405	0.570959	0.492692	0.395068	0.409446	0.613855	0.346759	0.361534	0.454271	0.395035	0.575169	0.479181	0.491862	0.459223	0.451201	0.46655	0.638626	0.594838	0.722407	0.750889	0.606977	0.631701	0.486185	0.536343	0.275594	0.679699	0.495519	0.586142
11	0.350328	0.350579	0.133553	0.25224	0.42823	0.485584	0.413559	0.282783	0.331606		0.445641	0.566102	0.413824	0.550114	0.690895	0.551698	0.512408	0.54786	0.494518	0.441695	0.749012	0.520534	0.566396	0.613375	0.413962	0.400374	0.544592	0.370535	0.325815	0.549867	0.376494	0.535665	0.490868	0.547608	0.510027	0.483824	0.502686	0.637167	0.665252	0.790956	0.700303	0.568485	0.519711	0.377144	0.648473	0.382666	0.548667	0.472263	0.666506
12	0.366482	0.375778	0.141789	0.250173	0.414195	0.416872	0.437869	0.296159	0.329706		0.450422	0.569683	0.453018	0.553957	0.66891	0.56204	0.590531	0.655725	0.427637	0.475252	0.623687	0.550176	0.491811	0.554125	0.475906	0.523525	0.662932	0.293209	0.340691	0.500043	0.412936	0.609039	0.583929	0.591567	0.565626	0.56343	0.456912	0.617499	0.639845	0.717989	0.658531	0.624603	0.631194	0.429431	0.505497	0.406642	0.487293	0.47528	0.595358
13	0.327927	0.399546	0.162808	0.255388	0.384721	0.530123	0.409254	0.242365	0.371501		0.416189	0.56802	0.494702	0.507324	0.630337	0.615734	0.494483	0.49134	0.52117	0.593383	0.499673	0.52542	0.67628	0.543518	0.381826	0.424987	0.607174	0.354922	0.353233	0.4509	0.44462	0.560803	0.593395	0.568265	0.516827	0.519518	0.515825	0.615063	0.608525	0.753949	0.622391	0.616015	0.636204	0.383547	0.605668	0.356096	0.456566	0.39349	0.554609
14	0.343996	0.429078	0.12167	0.267924	0.466871	0.456347	0.402919	0.246688	0.360836		0.408377	0.583571	0.455369	0.443913	0.707166	0.580742	0.557004	0.679148	0.478207	0.564938	0.512084	0.469154	0.55586	0.46918	0.351874	0.415341	0.528881	0.375341	0.377021	0.449388	0.415419	0.529449	0.616843	0.551781	0.500941	0.487649	0.449704	0.593331	0.59324	0.699281	0.586698	0.571884	0.625213	0.283135	0.509052	0.232004	0.483357	0.422011	0.584222
15	0.358406	0.441191	0.139847	0.2704	0.408841	0.54389	0.422792	0.25284	0.337867		0.381286	0.549363	0.394198	0.433778	0.674466	0.575245	0.486619	0.491742	0.44872	0.471516	0.525956	0.479882	0.604541	0.386739	0.364893	0.414516	0.557747	0.335956	0.391449	0.374605	0.456252	0.526815	0.54201	0.502547	0.565464	0.54298	0.566856	0.630277	0.581862	0.733324	0.647679	0.563065	0.639941	0.404383	0.515381	0.439752	0.589066	0.375811	0.572297
16	0.347474	0.474247	0.122752	0.283251	0.407802	0.481126	0.419102	0.295728	0.371439		0.34335	0.506253	0.376443	0.509556	0.637557	0.622326	0.547543	0.602141	0.468748	0.595655	0.615905	0.456533	0.500843	0.515374	0.4258	0.463275	0.606071	0.35978	0.342075	0.56791	0.560504	0.576492	0.544418	0.506893	0.52696	0.526199	0.546462	0.552454	0.525932	0.71517	0.63035	0.59706	0.605541	0.363383	0.705477	0.373135	0.631487	0.429226	0.453846
17	0.355049	0.465347	0.116939	0.330231	0.379233	0.567537	0.422601	0.320223	0.280556		0.345703	0.503436	0.456101	0.53419	0.693802	0.588528	0.554063	0.574163	0.431231	0.398387	0.505104	0.4406	0.438423	0.494276	0.44095	0.467143	0.598523	0.328362	0.314248	0.427923	0.456574	0.559653	0.523295	0.469776	0.465309	0.4834	0.515537	0.548216	0.553917	0.615945	0.562167	0.583838	0.613952	0.385104	0.513358	0.435269	0.58458	0.444272	0.405325
18	0.363155	0.461786	0.112678	0.281806	0.441105	0.600575	0.4244	0.275488	0.370691		0.340286	0.53489	0.399522	0.471882	0.680758	0.639297	0.525532	0.491858	0.534282	0.595515	0.572551	0.448215	0.564613	0.524115	0.446204	0.549848	0.645011	0.281776	0.288706	0.591806	0.477279	0.52687	0.477032	0.406087	0.410797	0.403557	0.531853	0.528566	0.502051	0.679276	0.572071	0.646754	0.513005	0.354045	0.573628	0.337535	0.439634	0.433931	0.562087
19	0.371392	0.458893	0.115024	0.308368	0.438969	0.627329	0.431495	0.329633	0.322784		0.332396	0.600137	0.425076	0.509491	0.699413	0.605676	0.542326	0.597349	0.55532	0.45287	0.507714	0.432329	0.634999	0.534795	0.478384	0.641235	0.639689	0.317918	0.2818	0.505063	0.39897	0.520313	0.505819	0.404254	0.487517	0.460198	0.558887	0.536783	0.57134	0.689096	0.634935	0.576341	0.509148	0.418889	0.543083	0.382266	0.552315	0.427943	0.574174
20	0.386822	0.497538	0.121087	0.289054	0.452915	0.504506	0.446358	0.355839	0.349243		0.360569	0.648165	0.457335	0.51005	0.69578	0.638992	0.632248	0.61494	0.510344	0.563844	0.572317	0.498612	0.473505	0.565431	0.451667	0.506264	0.694375	0.334436	0.291077	0.412805	0.383348	0.505245	0.482225	0.464395	0.448393	0.438457	0.569106	0.542973	0.489049	0.587765	0.513576	0.612301	0.554117	0.362421	0.547249	0.288364	0.555572	0.444406	0.581745
21	0.367537	0.544356	0.157435	0.266316	0.392082	0.604431	0.414884	0.24071	0.286216		0.383202	0.668983	0.519384	0.465849	0.744492	0.666387	0.550539	0.511947	0.582404	0.541247	0.490004	0.474207	0.628676	0.610945	0.41973	0.519989	0.697999	0.325137	0.24294	0.421976	0.457145	0.55642	0.478818	0.465543	0.389742	0.383802	0.557433	0.533443	0.599604	0.555418	0.506153	0.555383	0.64042	0.330445	0.590413	0.289157	0.483326	0.424731	0.565983
22	0.38095	0.534616	0.1311	0.30314	0.45601	0.747792	0.394548	0.232913	0.43494		0.40552	0.692742	0.560185	0.494566	0.711352	0.604605	0.764214	0.539489	0.50069	0.514545	0.471037	0.526927	0.504491	0.515779	0.42259	0.636737	0.659923	0.380178	0.301137	0.484863	0.448998	0.51501	0.476175	0.55727	0.41379	0.407043	0.633453	0.529434	0.464455	0.629875	0.660043	0.617916	0.595376	0.469072	0.513704	0.277677	0.508857	0.409309	0.527367
23	0.397369	0.521766	0.14755	0.283857	0.450284	0.638521	0.380917	0.311034	0.205784		0.329711	0.708267	0.585253	0.548878	0.696437	0.692059	0.583331	0.744287	0.549896	0.539613	0.631446	0.485074	0.465372	0.537337	0.414205	0.534741	0.641552	0.40089	0.223947	0.461997	0.411724	0.474085	0.541505	0.530775	0.398263	0.376116	0.603906	0.520852	0.478554	0.667739	0.661811	0.605197	0.61648	0.374766	0.617519	0.142376	0.479975	0.402961	0.636977
24	0.397633	0.533713	0.153561	0.282254	0.450975	0.644705	0.401441	0.440151	0.346833		0.444065	0.639734	0.555685	0.510225	0.710829	0.476772	0.685456	0.566271	0.501048	0.542757	0.646915	0.543969	0.548878	0.64306	0.441943	0.694338	0.629377	0.395856	0.320828	0.518052	0.382592	0.46171	0.495437	0.557741	0.360669	0.341899	0.595096	0.472666	0.579601	0.677797	0.669519	0.592563	0.591654	0.425823	0.485376	0.26691	0.554976	0.41489	0.58935
25	0.417195	0.534715	0.181407	0.299915	0.454622	0.791571	0.432891	0.312106	0.331816		0.369895	0.64396	0.589578	0.486378	0.634429	0.704581	0.800058	0.468317	0.452352	0.520953	0.442817	0.49591	0.602866	0.740835	0.447143	0.450445	0.661078	0.363242	0.315375	0.544697	0.410639	0.487025	0.558313	0.487613	0.320997	0.308009	0.614932	0.558023	0.58225	0.6701	0.55618	0.595046	0.734057	0.385042	0.628201	0.233058	0.549204	0.527317	0.513039
26	0.395188	0.509165	0.183097	0.26917	0.43227	0.664108	0.412763	0.281759	0.453854		0.451006	0.69739	0.498461	0.548226	0.576403	0.601251	0.610687	0.489744	0.480322	0.377379	0.649559	0.591964	0.734519	0.480733	0.357658	0.516565	0.702477	0.355528	0.307943	0.474317	0.467996	0.555242	0.556677	0.497373	0.349803	0.336713	0.603176	0.472276	0.629959	0.690587	0.684123	0.647591	0.673191	0.415472	0.599276	0.237438	0.658807	0.50663	0.584185
27	0.402036	0.525681	0.165298	0.266533	0.428245	0.524382	0.409611	0.417614	0.444106		0.399114	0.604678	0.544537	0.511462	0.669668	0.671823	0.671874	0.566869	0.599612	0.524413	0.699558	0.554282	0.441862	0.505499	0.427393	0.531081	0.72687	0.441974	0.300719	0.427828	0.401673	0.595084	0.507537	0.488249	0.428342	0.426084	0.614115	0.50103	0.568485	0.661485	0.549389	0.527589	0.721533	0.437797	0.705561	0.304506	0.508378	0.393903	0.523282
28	0.405989	0.514495	0.211958	0.295101	0.444896	0.659048	0.428739	0.311173	0.36106		0.444752	0.720404	0.485511	0.568329	0.615878	0.621941	0.643411	0.502814	0.558802	0.363416	0.553911	0.384235	0.547264	0.556717	0.463618	0.472723	0.682432	0.444189	0.291691	0.451695	0.463982	0.579083	0.601265	0.519503	0.443977	0.435119	0.594056	0.474881	0.521619	0.649814	0.573886	0.405507	0.528203	0.43128	0.69117	0.329168	0.447002	0.367509	0.472253
29	0.399822	0.523451	0.184806	0.311673	0.446279	0.720465	0.421122	0.374527	0.439577		0.522475	0.650325	0.531798	0.60656	0.600991	0.634585	0.725948	0.550986	0.514709	0.529709	0.596711	0.568968	0.667479	0.420196	0.393856	0.714766	0.706986	0.433105	0.331332	0.446845	0.504886	0.52516	0.615338	0.504079	0.482675	0.463535	0.620865	0.535785	0.556619	0.64592	0.624946	0.597202	0.582671	0.55052	0.568957	0.338644	0.620385	0.417011	0.507615
30	0.431477	0.551344	0.218424	0.274134	0.462891	0.645746	0.439734	0.480308	0.340199		0.347941	0.703218	0.468631	0.520078	0.695539	0.600147	0.73963	0.587527	0.552556	0.747493	0.58533	0.509432	0.424268	0.422231	0.410935	0.60936	0.764879	0.480616	0.32789	0.529668	0.453525	0.525739	0.525453	0.49492	0.405681	0.362866	0.577807	0.498433	0.608642	0.665176	0.679419	0.526947	0.559698	0.494035	0.504741	0.451388	0.541817	0.406735	0.565298
31	0.40037	0.528622	0.199967	0.285904	0.451782	0.715599	0.414968	0.342377	0.306885		0.509193	0.665249	0.489269	0.461649	0.741011	0.602388	0.747531	0.529931	0.530734	0.500072	0.516363	0.501879	0.577483	0.659195	0.410606	0.60036	0.704623	0.492001	0.295476	0.457063	0.520913	0.545377	0.480349	0.493733	0.444629	0.421668	0.553363	0.532859	0.686291	0.680046	0.636788	0.598679	0.650954	0.460201	0.585645	0.5078	0.603647	0.516768	0.573233
32	0.408749	0.502432	0.245111	0.33456	0.461556	0.668979	0.379165	0.416434	0.356389		0.461313	0.649519	0.486723	0.516393	0.782992	0.624822	0.648668	0.639273	0.488946	0.607137	0.623068	0.539525	0.573666	0.508073	0.456052	0.595218	0.727706	0.394245	0.323217	0.427382	0.491152	0.48738	0.515722	0.461449	0.420515	0.40664	0.614147	0.501561	0.683338	0.690073	0.684728	0.594484	0.634287	0.497163	0.487331	0.447801	0.5297	0.452472	0.504109
33	0.409323	0.528017	0.271373	0.278939	0.459003	0.63822	0.433809	0.399445	0.47613		0.417728	0.606567	0.398592	0.483211	0.845644	0.625908	0.474381	0.575304	0.425553	0.629294	0.596582	0.554926	0.604075	0.483653	0.401739	0.66104	0.570193	0.417504	0.356416	0.545632	0.455753	0.493643	0.433401	0.470254	0.476794	0.476497	0.582098	0.479777	0.750305	0.78524	0.695234	0.629107	0.568053	0.486247	0.614572	0.461001	0.537211	0.443581	0.543793
34	0.380206	0.555191	0.28699	0.296534	0.484132	0.611226	0.44904	0.472239	0.343557		0.42553	0.623106	0.455351	0.496327	0.913138	0.664251	0.58354	0.79217	0.475116	0.636612	0.432836	0.525414	0.555482	0.647439	0.467734	0.443258	0.71079	0.461242	0.291091	0.52028	0.423191	0.515629	0.413689	0.466506	0.542457	0.532499	0.543926	0.510007	0.727199	0.833468	0.785981	0.70151	0.607323	0.51913	0.591139	0.444513	0.461675	0.417366	0.55372
35	0.421139	0.563486	0.269341	0.293029	0.423969	0.623952	0.436672	0.470323	0.429139		0.388954	0.648017	0.46525	0.469959	0.702548	0.665043	0.697814	0.47083	0.477894	0.564872	0.512192	0.509737	0.679426	0.624385	0.421369	0.485014	0.668582	0.474582	0.309869	0.509466	0.420558	0.527708	0.513483	0.406571	0.475691	0.468814	0.695843	0.418601	0.63388	0.826205	0.725961	0.630437	0.577104	0.481699	0.591887	0.499917	0.461527	0.411268	0.612264
36	0.436477	0.545223	0.228693	0.282747	0.469552	0.616063	0.443222	0.448429	0.378678		0.33264	0.648232	0.486935	0.448959	0.646627	0.715549	0.661291	0.500852	0.519651	0.536166	0.626382	0.606983	0.588537	0.540365	0.38248	0.467463	0.587042	0.402593	0.363034	0.454626	0.410733	0.512497	0.523717	0.387558	0.415718	0.374941	0.651845	0.550744	0.638414	0.780723	0.737401	0.72262	0.669394	0.487879	0.630125	0.415152	0.629636	0.455739	0.594992
37	0.412139	0.616916	0.34973	0.305566	0.464673	0.461661	0.419311	0.295771	0.340745		0.350173	0.644001	0.472017	0.512227	0.767894	0.504527	0.488334	0.583342	0.745596	0.54639	0.564172	0.524493	0.525927	0.498568	0.368965	0.495708	0.637708	0.44756	0.313819	0.577065	0.427788	0.525048	0.519709	0.437813	0.523252	0.495869	0.641851	0.54201	0.540574	0.663077	0.733057	0.728431	0.614262	0.513512	0.620743	0.376673	0.666944	0.408874	0.562852
38	0.430884	0.531797	0.436398	0.319075	0.451411	0.684222	0.385028	0.454154	0.302978		0.383722	0.608539	0.496255	0.488761	0.565425	0.521665	0.59923	0.58217	0.38587	0.465276	0.472524	0.486199	0.550458	0.551864	0.345143	0.511557	0.630283	0.439238	0.278204	0.545902	0.363475	0.491519	0.481337	0.45728	0.498754	0.464421	0.645748	0.580497	0.588348	0.618275	0.655135	0.626079	0.612645	0.472886	0.497306	0.355749	0.631315	0.390226	0.511197
39	0.430091	0.573936	0.365934	0.266955	0.477553	0.643214	0.403385	0.447331	0.358897		0.385583	0.589123	0.548423	0.481477	0.69929	0.633014	0.707942	0.704692	0.495323	0.721998	0.461257	0.470952	0.481249	0.551466	0.369244	0.528051	0.531657	0.393919	0.346974	0.470343	0.478255	0.512405	0.473957	0.429727	0.500704	0.501787	0.648955	0.62782	0.540809	0.626321	0.612527	0.642925	0.56175	0.403148	0.592777	0.325629	0.649139	0.375386	0.535886
40	0.426744	0.538303	0.425305	0.308387	0.448981	0.578181	0.404583	0.529867	0.47562		0.381321	0.548891	0.449807	0.466161	0.657747	0.800412	0.645155	0.618843	0.508096	0.631254	0.425493	0.458895	0.554029	0.480001	0.376969	0.538482	0.582045	0.398676	0.293801	0.527271	0.450279	0.511841	0.488261	0.392706	0.498072	0.492145	0.733444	0.572673	0.479531	0.67946	0.578737	0.570621	0.498918	0.412441	0.456481	0.253316	0.588745	0.462406	0.545657
41	0.412689	0.55158	0.474686	0.308615	0.487978	0.712878	0.407933	0.412165	0.490497		0.334807	0.542702	0.496938	0.397767	0.808221	0.738149	0.712044	0.697287	0.633327	0.549038	0.385547	0.460616	0.536396	0.582588	0.428631	0.489702	0.571319	0.35262	0.30246	0.501845	0.413604	0.461768	0.490919	0.434282	0.413696	0.388442	0.567946	0.54634	0.688289	0.606023	0.451062	0.615444	0.55055	0.443217	0.517454	0.270129	0.514533	0.344271	0.415203
42	0.462425	0.548631	0.472945	0.287489	0.431216	0.607604	0.412343	0.501358	0.583092		0.348488	0.561133	0.450108	0.505753	0.48505	0.645667	0.624521	0.524805	0.418836	0.470428	0.577192	0.472793	0.613304	0.622951	0.448908	0.618935	0.533429	0.385224	0.315072	0.53368	0.347919	0.477752	0.372265	0.414641	0.476545	0.437992	0.718282	0.562965	0.546277	0.525095	0.614717	0.627063	0.492446	0.40927	0.531615	0.302663	0.559422	0.481556	0.525591
43	0.438302	0.568224	0.487134	0.290178	0.463483	0.624694	0.448749	0.542503	0.509519		0.361793	0.583086	0.437313	0.506831	0.613032	0.757555	0.676764	0.727441	0.357522	0.399315	0.562989	0.482724	0.477971	0.453845	0.405885	0.523056	0.651859	0.391302	0.302376	0.477305	0.472505	0.430161	0.383147	0.4415	0.424186	0.410878	0.641075	0.543805	0.593149	0.618241	0.550646	0.67445	0.547606	0.381021	0.494067	0.28402	0.542166	0.361373	0.664942
44	0.461986	0.533139	0.525156	0.2879	0.429494	0.600058	0.403877	0.498693	0.598843		0.364886	0.545881	0.42137	0.493043	0.597944	0.687795	0.566335	0.502501	0.475679	0.537132	0.596156	0.458392	0.550878	0.504905	0.446341	0.55087	0.599664	0.296579	0.35487	0.492161	0.441363	0.440134	0.438998	0.427999	0.369931	0.355596	0.706503	0.602482	0.652843	0.735056	0.664377	0.526892	0.544738	0.505901	0.498524	0.287091	0.497988	0.367132	0.515643
45	0.443079	0.496943	0.616823	0.271926	0.465079	0.601352	0.387255	0.63329	0.637048		0.368115	0.56088	0.459531	0.559787	0.641953	0.766549	0.606245	0.637995	0.482985	0.426334	0.611917	0.49203	0.590037	0.597404	0.444395	0.554602	0.583971	0.302176	0.323304	0.475444	0.428401	0.459444	0.461811	0.457715	0.388981	0.3954	0.648328	0.554494	0.658912	0.678739	0.691529	0.737265	0.526231	0.507578	0.593554	0.379388	0.545404	0.436405	0.638992
46	0.431576	0.545736	0.585498	0.279414	0.468884	0.632911	0.408905	0.743472	0.650231		0.39485	0.584251	0.378313	0.517431	0.747462	0.657445	0.704141	0.679458	0.466214	0.609043	0.383024	0.487558	0.572789	0.638469	0.442155	0.658522	0.568541	0.305226	0.290774	0.558701	0.494028	0.472451	0.406151	0.402918	0.471001	0.465656	0.622394	0.568403	0.590481	0.703668	0.693269	0.550222	0.621385	0.443159	0.437195	0.30842	0.593534	0.356927	0.541836
47	0.471448	0.516056	0.585565	0.293408	0.4592	0.629853	0.435375	0.570239	0.607722		0.336212	0.593843	0.475863	0.51467	0.577909	0.816042	0.697583	0.635447	0.651305	0.365291	0.484929	0.491918	0.766923	0.618282	0.306002	0.569101	0.571236	0.377106	0.313442	0.445879	0.451383	0.394306	0.373771	0.389868	0.492177	0.476202	0.654462	0.534104	0.608159	0.616899	0.705506	0.555059	0.586474	0.450622	0.597437	0.255953	0.530898	0.471222	0.552797
48	0.474399	0.554731	0.62696	0.281117	0.471474	0.598143	0.411281	0.658734	0.671107		0.386033	0.651595	0.464123	0.441204	0.612314	0.539691	0.72402	0.744184	0.759189	0.633795	0.583287	0.451224	0.462836	0.498101	0.42908	0.534955	0.634886	0.355037	0.370284	0.42043	0.385171	0.427943	0.395627	0.374057	0.420669	0.430967	0.753106	0.560037	0.640422	0.637826	0.647229	0.559629	0.590749	0.391753	0.57966	0.344159	0.538263	0.393673	0.63096
49	0.461105	0.541875	0.571845	0.264974	0.454218	0.586367	0.40947	0.654064	0.630163		0.358946	0.627846	0.445004	0.390812	0.588453	0.793367	0.638675	0.694688	0.692274	0.389791	0.590393	0.550226	0.416179	0.646444	0.399856	0.591036	0.615627	0.345849	0.358123	0.477949	0.390734	0.480401	0.379721	0.40951	0.369933	0.369224	0.684389	0.633051	0.547158	0.604787	0.615977	0.566898	0.651587	0.439	0.59123	0.270963	0.575097	0.327955	0.597357
50	0.509551	0.548369	0.612823	0.283668	0.469072	0.593153	0.400122	0.756968	0.605383		0.399884	0.619137	0.516839	0.428885	0.633571	0.659339	0.865149	0.490424	0.465368	0.479865	0.480222	0.516266	0.565443	0.619576	0.402856	0.471031	0.599324	0.385772	0.373193	0.509687	0.450741	0.443656	0.346836	0.439869	0.399637	0.411039	0.706338	0.486146	0.517825	0.587201	0.568924	0.535587	0.542599	0.564344	0.604073	0.307971	0.606901	0.449914	0.569087
51	0.468769	0.573884	0.653381	0.280663	0.438357	0.559042	0.389669	0.824191	0.561037		0.377538	0.577957	0.417701	0.545622	0.709371	0.691883	0.703049	0.722376	0.512161	0.453537	0.468874	0.498553	0.57725	0.675726	0.382198	0.410625	0.553489	0.364192	0.339788	0.424292	0.553312	0.361194	0.330741	0.419352	0.436259	0.422972	0.760728	0.532039	0.52479	0.640967	0.62602	0.601197	0.547882	0.453074	0.716198	0.313143	0.473775	0.384417	0.476261
52	0.46687	0.570408	0.702129	0.317923	0.471493	0.530314	0.415962	0.824881	0.724103		0.340701	0.628564	0.414515	0.46985	0.761842	0.855906	0.59577	0.593544	0.593131	0.597469	0.609773	0.518525	0.468543	0.449549	0.38468	0.492927	0.537771	0.344023	0.296625	0.467288	0.444176	0.365125	0.340551	0.398616	0.373138	0.36029	0.742348	0.495334	0.567753	0.627045	0.646292	0.544672	0.532822	0.536262	0.590095	0.197143	0.54388	0.438887	0.460314
53	0.520523	0.555629	0.715442	0.308257	0.458248	0.515329	0.426129	0.796844	0.736797		0.387959	0.61988	0.448871	0.506177	0.656764	0.653722	0.670858	0.589398	0.543276	0.671546	0.624001	0.501416	0.446099	0.539307	0.358094	0.464816	0.504234	0.338044	0.33439	0.486991	0.402983	0.300176	0.368626	0.364034	0.401768	0.382204	0.77441	0.505389	0.602874	0.608394	0.665826	0.553486	0.491269	0.469417	0.538873	0.252598	0.554992	0.387065	0.462508
54	0.546524	0.554872	0.741451	0.332599	0.444452	0.589383	0.39947	0.778793	0.681097		0.396273	0.564618	0.387675	0.464099	0.643221	0.574357	0.801737	0.686137	0.503752	0.463698	0.435021	0.461194	0.455456	0.653932	0.3627	0.466954	0.504838	0.320756	0.307	0.480993	0.339313	0.335131	0.357023	0.310704	0.428287	0.421856	0.763683	0.576669	0.535079	0.614354	0.578805	0.594058	0.553807	0.497532	0.545077	0.33112	0.534715	0.415554	0.511696
55	0.578547	0.540229	0.820216	0.313039	0.439624	0.538261	0.433798	0.802288	0.756316		0.359525	0.526345	0.464005	0.605477	0.639468	0.656632	0.617301	0.47277	0.592921	0.542324	0.345923	0.43929	0.308292	0.508802	0.38254	0.49109	0.46292	0.398668	0.345556	0.45305	0.331711	0.325692	0.294779	0.367904	0.379823	0.366583	0.787583	0.489795	0.559015	0.593296	0.586735	0.565603	0.581895	0.474054	0.506081	0.353759	0.512004	0.386212	0.496882
56	0.605616	0.560212	0.885653	0.339794	0.495194	0.553606	0.403542	0.808109	0.815082		0.376341	0.508347	0.56219	0.588064	0.578547	0.764996	0.581573	0.649014	0.557882	0.460496	0.300116	0.425475	0.428591	0.575413	0.43348	0.371007	0.501456	0.415445	0.330616	0.488416	0.418101	0.373906	0.374963	0.357852	0.396067	0.384557	0.716034	0.54961	0.565248	0.613072	0.650253	0.539073	0.519138	0.485948	0.554669	0.31607	0.562514	0.431489	0.520427
57	0.610935	0.584784	0.850598	0.337577	0.468906	0.50775	0.412917	0.732148	0.686148		0.359513	0.454757	0.532228	0.513919	0.504939	0.663833	0.575185	0.549573	0.644369	0.505867	0.418812	0.402537	0.384713	0.583153	0.464875	0.423066	0.445806	0.409119	0.283551	0.507976	0.482506	0.384784	0.340235	0.437355	0.35973	0.358368	0.759537	0.530955	0.549962	0.625221	0.5918	0.574932	0.50434	0.471772	0.595893	0.282877	0.472235	0.408413	0.472156
58	0.637313	0.620832	0.907207	0.360954	0.481967	0.523643	0.366589	0.778046	0.573315		0.379027	0.448307	0.408449	0.5112	0.498042	0.606303	0.48568	0.542362	0.587626	0.600784	0.373162	0.396021	0.464142	0.509357	0.483719	0.405497	0.420731	0.466301	0.326048	0.467366	0.442181	0.440019	0.34609	0.40033	0.447436	0.429272	0.726289	0.499639	0.491452	0.548991	0.606215	0.475895	0.548329	0.414801	0.555102	0.316984	0.500101	0.4003	0.412251
59	0.676746	0.590264	0.938662	0.385524	0.466979	0.523932	0.405219	0.670569	0.633552		0.401833	0.381626	0.383939	0.590907	0.539017	0.529705	0.487654	0.582011	0.59948	0.574781	0.463136	0.383347	0.37722	0.565073	0.474545	0.346553	0.392398	0.467916	0.375839	0.44881	0.509523	0.536529	0.372729	0.479474	0.419683	0.400026	0.68217	0.456849	0.432913	0.485004	0.526614	0.488036	0.506498	0.444555	0.602267	0.244568	0.491771	0.413023	0.498731
60	0.519672	0.547192	0.63109	0.329229	0.465793	0.509616	0.409749	0.523153	0.712476		0.342267	0.28068	0.387664	0.55332	0.414674	0.491782	0.403272	0.441048	0.499944	0.517936	0.396014	0.371226	0.384744	0.430321	0.396396	0.314776	0.275055	0.45597	0.45014	0.436035	0.436311	0.504225	0.483842	0.437342	0.399816	0.387343	0.474757	0.306306	0.553639	0.504003	0.518826	0.426149	0.395253	0.368335	0.382645	0.534159	0.378623	0.372518	0.38647
[truncated: 48 more columns]

## Sheet: 1E.iv
Figure 1 E.iv.
VTA roi	VTA axon Slope	R-squared		LC roi	LC axon Slope	R-squared
ROI 1	0.000850704	0.795542		ROI 1	-0.000147174	0.0846124
ROI 2	0.000902793	0.705563		ROI 2	-6.29653e-05	0.00572997
ROI 3	0.00265227	0.800163		ROI 3	-5.54963e-05	0.0075491
ROI 4	0.000260179	0.48763		ROI 4	-3.93861e-05	0.0047845
ROI 5	0.000264931	0.52678		ROI 5	-0.000108841	0.0120534
ROI 6	0.000502029	0.171457		ROI 6	0.000351383	0.138023
ROI 7	-9.57064e-05	0.16002		ROI 7	0.00044902	0.157616
ROI 8	0.00204245	0.802366		ROI 8	0.000213812	0.0453874
ROI 9	0.00146438	0.670042		ROI 9	2.92177e-05	0.000782234
				ROI 10	5.71516e-05	0.00323502
				ROI 11	-0.000325473	0.0855654
				ROI 12	-0.000164078	0.085475
				ROI 13	-0.000403475	0.143933
				ROI 14	0.00034997	0.146409
				ROI 15	-9.66025e-05	0.0384861
				ROI 16	5.35126e-05	0.00278563
				ROI 17	-0.000179318	0.0306964
				ROI 18	9.44685e-05	0.0226466
				ROI 19	-3.29856e-05	0.00658495
				ROI 20	5.07955e-05	0.00869117
				ROI 21	-1.11578e-06	3.63247e-06
				ROI 22	-0.000503575	0.366979
				ROI 23	-0.00039047	0.147181
				ROI 24	-0.000477062	0.469742
				ROI 25	-0.000346991	0.236109
				ROI 26	-0.000346738	0.230487
				ROI 27	0.00117539	0.849157
				ROI 28	-0.000235648	0.1563
				ROI 29	-0.000280289	0.108057
				ROI 30	-0.000569795	0.349455
				ROI 31	-0.000217945	0.0697844
				ROI 32	-0.00017762	0.0640437
				ROI 33	-0.000331627	0.23188
				ROI 34	0.000252497	0.148622
				ROI 35	-0.000137603	0.0303135
				ROI 36	-0.000272377	0.0836743
				ROI 37	-0.000289029	0.122119
				ROI 38	-0.000227866	0.175102
				ROI 39	-0.000266455	0.136716
				ROI 40	4.63366e-05	0.0182691
				ROI 41	0.000220005	0.157891
				ROI 42	-0.000396964	0.601472
				ROI 43	0.00051362	0.230532
				ROI 44	0.000435939	0.491336
				ROI 45	0.000273743	0.165468
				ROI 46	-0.000306955	0.210328
				ROI 47	4.49935e-05	0.00314375
				ROI 48	-0.000466063	0.459112
				ROI 49	-0.000363399	0.295413
				ROI 50	-0.000387676	0.401914
				ROI 51	0.000342247	0.290313
				ROI 52	-0.000380744	0.409988
				ROI 53	-0.000255675	0.201364
				ROI 54	0.000427792	0.526857
				ROI 55	7.26221e-05	0.0267016
				ROI 56	2.96369e-05	0.00726105
				ROI 57	-1.55727e-05	0.00177135
				ROI 58	-0.000138404	0.105784
				ROI 59	-0.000351525	0.319737
				ROI 60	-0.000556558	0.470389
				ROI 61	0.000135138	0.119632
				ROI 62	-0.000556869	0.482962
				ROI 63	9.61448e-05	0.0394928
				ROI 64	0.000329311	0.444185
				ROI 65	0.000258165	0.187793
				ROI 66	-7.44923e-05	0.02113
				ROI 67	-5.12514e-05	0.00979384
				ROI 68	-0.000186292	0.132822
				ROI 69	-0.000130031	0.0834849
				ROI 70	-0.000315594	0.266358
				ROI 71	-0.000332409	0.261062
				ROI 72	-0.00103799	0.802234
				ROI 73	-0.000298557	0.227451
				ROI 74	-0.000241201	0.287135
				ROI 75	-0.000225589	0.226658
				ROI 76	0.000250224	0.195058
				ROI 77	0.000386567	0.270968
				ROI 78	0.000402053	0.381796
				ROI 79	0.000171374	0.0961101
				ROI 80	0.000237951	0.353077
				ROI 81	0.000223071	0.302236
				ROI 82	0.0003022	0.195735
				ROI 83	0.000127686	0.132775
				ROI 84	0.000242135	0.319354
				ROI 85	0.000198915	0.261174
				ROI 86	0.000100746	0.125714
				ROI 87	7.08407e-05	0.0127456

## Sheet: 1Fi
Figure 1 E.i.
	VTA axon velocity binned F												LC axon velocity binned F
bin	lap 1	lap 2	lap 3	lap 4	lap 5	lap 6	lap 7	lap 8	lap 9	lap 10			lap 1	lap 2	lap 3	lap 4	lap 5	lap 6	lap 7	lap 8	lap 9	lap 10	lap 11	lap 12	lap 13	lap 14	lap 15	lap 16	lap 17	lap 18	lap 19	lap 20	lap 21	lap 22	lap 23
1	0.48659	0.436243	0.4957	0.408105	0.470982	0.433588	0.471182	0.618793	0.570456	0.642448			0.174138	0.167597	0.120419	0.184561	0.161387	0.159963	0.14195	0.171378	0.163266	0.157739	0.134491	0.188481	0.125763	0.141441	0.168142	0.188442	0.150575	0.184373	0.153761	0.175414	0.152533	0.117376	0.0876947
2	0.616178	0.426389	0.483647	0.453277	0.482027	0.733	0.381027	0.448774	0.403822	0.296252			0.19388	0.171012	0.144388	0.145166	0.149564	0.167901	0.141989	0.143771	0.20229	0.207645	0.130243	0.25616	0.11059	0.111493	0.197219	0.272369	0.161902	0.18217	0.126109	0.17386	0.208396	0.129956	0.11789
3	NaN	0.308952	0.828528	NaN	0.233756	NaN	0.283788	0.395719	0.339777	0.637445			0.133648	0.248565	0.208467	0.120435	0.150518	0.27173	NaN	0.179221	0.182211	0.161016	0.0829507	0.0962582	0.166353	0.160855	0.184738	0.164694	0.194078	0.256194	0.188415	0.138811	0.161074	0.132144	0.145426
4	0.560272	0.522033	NaN	NaN	0.277324	0.2994	0.121405	0.1674	0.515795	NaN			0.454449	0.297058	0.0956262	0.180118	0.2788	0.33828	0.304952	0.113972	0.3312	0.17895	NaN	0.209259	0.352334	0.208133	0.34952	0.141322	0.221808	0.30202	0.512343	0.156468	0.194771	0.174022	NaN
5	NaN	0.208543	NaN	NaN	0.157259	0.452344	0.073116	0.159612	0.432392	NaN			0.392006	0.361733	0.241182	0.343899	0.268982	0.242195	0.260871	0.105673	0.264794	0.266907	NaN	0.373427	0.366944	0.207582	0.180166	0.333427	0.265849	NaN	NaN	0.192171	NaN	0.269841	NaN
6	0.980207	0.372194	0.741521	NaN	0.313473	0.611133	NaN	0.456934	NaN	NaN			0.733142	0.431037	0.174299	0.30745	0.154395	NaN	0.346917	NaN	NaN	NaN	0.280556	0.279886	0.401672	0.294923	0.432505	0.163863	0.0919419	0.525989	0.177882	0.288187	0.335278	0.177039	NaN
7	NaN	1.10052	0.241084	0.4597	0.287973	NaN	0.0248502	0.348131	0.451003	NaN			0.377315	0.434637	0.420638	0.428161	0.341614	NaN	0.459825	NaN	0.25226	0.225842	0.324987	0.249019	0.228919	0.305934	0.177632	NaN	0.357014	0.608366	0.312793	NaN	0.163867	0.357637	NaN
8	0.758989	NaN	0.836744	NaN	0.379443	0.557245	0.454712	0.372594	0.386862	NaN			0.576304	0.592578	0.34902	0.284809	0.129618	NaN	0.309533	0.404477	NaN	NaN	0.616377	0.285001	0.384678	NaN	0.389566	0.431104	NaN	NaN	0.110513	0.215735	0.357301	0.436707	0.177588
9	0.45025	0.372595	0.811544	0.639636	0.45812	0.352095	1.06434	NaN	0.607028	0.512453			0.543905	NaN	0.244767	0.475344	0.435966	0.270558	NaN	0.336633	0.326705	NaN	0.307499	0.269526	0.455739	NaN	0.638831	0.647974	0.386214	NaN	0.489479	0.48535	0.298596	0.376378	NaN
10	0.772415	1.40161	0.632992	0.218601	NaN	0.385663	0.423841	0.232002	1.322	0.601389			0.509062	0.461743	0.477515	0.368668	0.366961	NaN	NaN	NaN	NaN	0.48517	NaN	0.240657	0.380205	0.50433	0.210561	0.833359	NaN	0.402999	0.484888	0.376241	NaN	0.407882	NaN
11	0.768546	1.02085	0.782014	0.608811	0.793694	0.597588	0.573644	0.500968	NaN	0.543008			0.534168	0.452144	0.36313	NaN	0.399501	0.391515	0.348308	NaN	0.276226	0.263832	NaN	0.616654	0.396034	0.427746	0.218451	0.583755	NaN	0.518657	0.521395	0.373717	0.389408	0.574321	NaN
12	0.0749772	1.39105	1.01394	0.770249	0.762602	0.598271	NaN	0.648085	0.912817	0.329304			0.525906	0.705104	0.626986	0.373478	NaN	NaN	0.499873	0.573807	NaN	NaN	0.433856	0.337517	0.572287	0.546718	0.473159	0.345011	NaN	NaN	NaN	0.128106	0.563497	0.541155	0.18732
13	0.793605	1.07796	0.502122	0.732529	1.17455	0.0744967	NaN	0.377278	0.650431	0.441381			0.407959	NaN	0.54516	0.598182	0.598505	0.42984	0.302072	0.516709	0.444801	0.499056	0.574113	0.647753	0.466955	0.295121	0.192859	0.320989	0.455402	NaN	0.626089	0.465064	NaN	0.55654	NaN
14	0.588074	0.738419	0.966908	0.732746	0.712897	NaN	NaN	0.615606	0.518583	0.359121			0.490074	NaN	0.527866	0.513681	0.654435	0.329603	0.391213	0.485152	0.450543	0.260357	NaN	0.323298	0.388278	0.369126	0.447944	NaN	0.714972	0.396571	0.521885	0.314436	NaN	0.609256	NaN
15	0.820119	0.742118	0.936842	0.704309	0.134252	0.812878	0.431184	0.463572	0.242437	0.577794			0.548831	0.581316	0.466557	0.552999	0.610463	0.539195	0.502627	0.420269	0.525943	0.489043	0.368675	0.471833	0.395062	0.415506	0.48059	NaN	0.52682	0.374679	0.476469	0.468933	0.470054	0.491521	NaN
16	0.0669547	NaN	0.239176	0.189138	0.907356	0.839388	0.446063	0.0914313	0.125628	NaN			0.270278	0.620362	0.464487	0.554727	0.401434	NaN	0.359249	NaN	0.394347	0.291447	0.4901	0.39182	0.48244	0.367818	0.52549	0.543786	0.429458	0.476397	0.590379	NaN	0.478087	0.533564	0.0804449
17	NaN	0.362689	0.296244	0.436977	NaN	1.01688	0.46099	NaN	0.344317	0.729383			0.725477	0.669672	0.540697	0.543454	0.621706	0.63198	0.315213	0.63219	0.429063	0.48597	0.519082	0.295275	0.64351	0.410007	0.283002	0.500025	0.255538	NaN	0.514293	0.372652	0.394742	0.674948	NaN
18	0.37341	1.1124	0.196427	0.284466	NaN	0.207741	0.351297	0.274195	0.882061	0.15723			0.431739	0.614318	NaN	0.612082	NaN	0.463827	0.413692	0.352007	0.412337	0.35065	NaN	0.270425	0.456521	0.300978	NaN	0.423381	0.465725	0.516602	0.456194	0.294029	NaN	0.499159	0.474361
19	0.59546	0.390034	0.398208	0.372672	NaN	NaN	0.777435	0.449558	0.238148	0.627143			0.83888	0.728429	NaN	0.460098	0.571566	NaN	0.702181	0.540242	0.337816	0.35765	0.541998	NaN	0.470663	0.456925	NaN	0.603454	0.522023	NaN	0.492012	0.423522	NaN	NaN	0.122487
20	0.438305	0.613826	0.437923	0.460918	0.610817	0.37372	0.137111	0.216335	0.274833	0.56218			0.788248	0.722918	0.493695	0.589037	0.47941	0.301307	0.442597	0.607752	0.470152	0.390725	NaN	0.413449	0.582428	0.615427	0.366329	NaN	NaN	0.395234	0.740666	0.440227	0.628462	0.433473	0.36075
21	0.532382	0.675124	NaN	0.4142	0.65373	0.88314	0.213819	0.137169	0.307572	0.325033			NaN	0.474581	0.566809	0.528227	0.595648	0.317204	0.724049	0.590738	0.417407	0.466634	0.602634	0.434977	0.477869	0.5668	0.40216	0.726515	NaN	NaN	NaN	NaN	0.233402	0.576996	NaN
22	0.504646	0.865719	0.338904	0.299702	0.47547	0.594651	0.632331	NaN	NaN	0.426802			0.597252	0.621987	0.540677	NaN	0.51614	0.570189	0.406525	0.627322	NaN	0.481608	0.515706	0.421039	0.429894	0.512714	NaN	0.400846	0.401974	0.367014	NaN	NaN	0.552287	0.369619	0.205862
23	0.593834	0.419343	0.262295	0.471275	0.485076	0.648991	0.206534	0.206507	0.512745	0.626267			NaN	0.758883	0.407425	0.546657	0.767911	0.367461	0.296403	0.59431	0.448481	0.411635	NaN	0.439551	0.465812	NaN	0.398884	0.531033	0.339846	NaN	0.438751	0.336833	0.534667	0.458774	0.238987
24	0.374523	0.677699	0.726828	0.201745	0.52994	0.630349	0.0278914	0.491884	0.339438	0.245964			0.708949	NaN	0.602441	0.656012	0.519723	0.50371	NaN	0.352479	NaN	0.345761	NaN	0.493897	0.54437	0.548852	NaN	0.448083	NaN	0.477028	0.559854	0.319561	0.533492	0.564391	NaN
25	0.489828	0.156146	0.531101	0.2174	0.581388	0.233981	0.105486	0.333333	0.762796	0.348283			0.538286	0.661212	0.475729	0.557988	0.500677	0.524042	NaN	0.446056	0.376392	NaN	0.578702	0.496228	NaN	0.581313	NaN	0.526687	0.513441	0.449197	0.461819	NaN	NaN	NaN	NaN
26	0.41497	0.379374	0.212279	0.0790222	0.500883	0.76398	0.189386	0.592719	0.60041	0.556966			0.657232	0.648111	0.494298	0.463895	0.546271	0.575768	0.375511	NaN	0.369434	0.534331	0.453273	0.417295	0.432859	0.482388	NaN	NaN	0.406436	NaN	NaN	NaN	0.61702	0.434918	0.304193
27	0.382831	0.208841	0.168375	0.28281	0.200035	0.201802	0.470648	0.350306	0.4074	0.322712			0.618395	0.625968	NaN	0.571372	0.417411	0.444667	0.418737	NaN	0.389652	0.446384	0.542931	NaN	0.406947	0.509988	0.359677	0.666547	NaN	NaN	NaN	NaN	0.489049	0.328413	NaN
28	0.638374	0.37685	0.277361	0.0878745	0.371405	0.422561	0.276943	0.172992	0.51512	0.365519			0.829465	0.595469	NaN	NaN	0.441594	NaN	NaN	0.501061	0.509852	NaN	NaN	0.596926	NaN	0.436249	0.470278	0.770114	0.411332	0.481946	0.597606	NaN	0.390649	NaN	NaN
29	NaN	0.345322	0.127549	0.397416	0.140511	0.71312	0.144825	0.174615	0.131012	0.234512			0.614079	NaN	0.51146	0.807973	0.546688	0.465181	0.544924	0.585403	0.39862	NaN	0.517122	0.332462	0.407362	0.606339	NaN	0.537362	0.679174	NaN	0.603494	0.719782	NaN	NaN	0.407382
30	0.817597	0.0751802	0.272028	0.426245	0.300736	0.190803	0.561201	0.687542	0.181314	0.395042			0.420463	0.561844	0.436231	0.489845	0.706511	NaN	NaN	NaN	NaN	NaN	0.566772	0.382565	0.467776	0.47097	0.45013	NaN	NaN	NaN	0.500508	NaN	NaN	0.497459	NaN
31	0.766341	0.151043	0.319782	0.0726838	0.280058	0.559286	0.387408	0.625697	0.155798	NaN			0.635498	0.635888	0.575597	0.753212	0.911507	0.51795	0.461564	0.550696	NaN	0.391928	0.319853	NaN	NaN	NaN	NaN	0.728308	0.378773	0.475811	NaN	0.158458	0.270033	0.440949	NaN
32	0.914215	0.280126	0.285809	0.151068	0.222208	0.438016	0.248281	0.298118	0.444808	0.185962			0.719821	NaN	0.595563	0.516998	0.653899	NaN	NaN	0.702523	NaN	NaN	0.621498	NaN	0.349911	0.530252	0.456416	NaN	NaN	0.366424	NaN	0.431765	0.429627	0.593165	NaN
33	0.961783	0.243166	0.214262	0.209865	NaN	0.117608	NaN	1.09426	0.248967	0.144036			NaN	NaN	NaN	0.437336	0.573627	NaN	NaN	NaN	NaN	0.372988	NaN	0.65759	0.46269	0.447511	0.397054	NaN	0.473874	0.579541	0.631697	0.528055	0.444013	0.498496	NaN
34	NaN	0.14396	0.130396	0.149438	0.254088	NaN	0.351297	NaN	NaN	NaN			0.839184	0.919834	0.642172	0.695468	0.678143	0.509486	NaN	0.474066	0.568401	NaN	0.638887	0.368515	0.47861	NaN	0.3969	NaN	NaN	NaN	0.417774	NaN	0.668617	NaN	0.249614
35	NaN	0.136339	0.406202	0.303295	NaN	0.198074	NaN	0.461658	0.146049	NaN			0.764202	0.652843	0.42222	NaN	0.783461	0.656171	0.63966	0.434368	0.335539	0.401596	0.382955	NaN	NaN	NaN	NaN	NaN	0.49808	0.356693	0.574467	NaN	0.42634	NaN	NaN
36	0.606044	NaN	0.153025	NaN	0.742198	NaN	0.279076	0.517355	0.286583	0.183034			0.558968	NaN	NaN	NaN	NaN	0.638316	NaN	0.460692	0.492023	NaN	NaN	NaN	0.500043	0.496053	0.476935	NaN	NaN	NaN	0.540936	0.345943	NaN	0.723401	0.358367
37	NaN	0.0770009	NaN	0.234193	NaN	0.309455	NaN	0.524397	NaN	0.197589			0.549314	0.838438	NaN	NaN	NaN	0.479628	NaN	0.569379	0.408145	0.542397	0.498292	0.414715	NaN	0.615505	0.388795	NaN	NaN	NaN	NaN	0.241564	NaN	0.687873	NaN
38	NaN	NaN	0.331987	NaN	0.437464	NaN	0.179847	0.0630317	NaN	-3.12059e-05			0.596254	NaN	0.611383	NaN	0.597642	NaN	0.451146	0.419651	0.500723	0.415042	NaN	NaN	0.471159	NaN	0.512261	NaN	0.476407	NaN	0.608897	0.439257	NaN	NaN	NaN
39	NaN	0.19867	0.202302	NaN	0.110713	0.232287	0.267703	0.418049	0.376809	0.0587742			0.746769	0.607917	NaN	NaN	NaN	NaN	0.510992	NaN	0.48258	NaN	NaN	NaN	0.595599	NaN	0.429937	0.596705	0.414066	0.535425	0.510425	NaN	NaN	0.596797	NaN
40	0.529922	NaN	0.200336	0.0708236	0.333749	0.516784	0.166696	0.356711	NaN	0.382675			0.530029	NaN	0.702294	0.653392	0.521138	0.816385	NaN	0.578757	NaN	NaN	NaN	NaN	NaN	0.480958	NaN	0.345736	0.417492	0.483016	0.502147	NaN	0.46517	0.53743	NaN
41	NaN	NaN	0.1904	0.26685	0.567205	0.489091	0.10962	NaN	0.281196	0.0940785			0.821466	0.555754	0.575592	NaN	NaN	NaN	0.448152	0.571216	NaN	0.48914	NaN	0.574302	0.593644	0.618215	NaN	0.636069	NaN	NaN	0.400775	NaN	NaN	0.47206	NaN
42	NaN	NaN	0.133836	NaN	NaN	NaN	NaN	NaN	0.235931	0.0937854			0.721456	NaN	NaN	0.540687	NaN	0.594063	0.599056	0.545948	0.503165	NaN	NaN	0.524309	0.606167	NaN	NaN	NaN	NaN	0.434315	NaN	NaN	NaN	NaN	NaN
43	0.654695	NaN	0.152541	0.261364	0.27353	NaN	0.189495	NaN	0.197386	0.177177			0.8455	0.883851	NaN	0.637718	0.711554	NaN	0.569093	NaN	NaN	NaN	0.631753	NaN	NaN	NaN	0.488045	NaN	NaN	NaN	0.909764	0.52473	0.543828	NaN	NaN
44	0.518282	NaN	0.286707	NaN	NaN	0.365188	NaN	NaN	0.271709	NaN			0.762704	0.815722	NaN	NaN	NaN	0.587863	0.539637	0.614123	NaN	NaN	0.518522	0.605981	0.647601	0.62514	0.510024	0.716515	0.669124	0.575686	0.490478	0.446774	0.541461	NaN	NaN
45	NaN	0.416305	0.236669	0.263824	0.20562	NaN	NaN	NaN	NaN	0.218219			0.512225	NaN	0.562609	0.58636	0.579893	NaN	0.356622	NaN	0.442914	0.446587	NaN	0.640635	NaN	NaN	NaN	NaN	NaN	NaN	NaN	NaN	0.464386	0.515162	NaN
46	0.597483	NaN	NaN	NaN	NaN	NaN	NaN	NaN	0.320404	NaN			NaN	0.646436	0.489219	0.761931	NaN	NaN	0.501253	NaN	0.415902	0.420884	NaN	0.428785	NaN	NaN	0.512369	0.579273	0.504392	0.544854	NaN	0.479944	0.61903	0.658228	0.273373
47	NaN	0.368722	0.176787	NaN	NaN	NaN	NaN	NaN	0.339389	NaN			NaN	0.603649	NaN	0.709516	0.650132	0.825315	NaN	NaN	0.518511	NaN	0.638137	0.74528	0.538121	0.491147	NaN	NaN	NaN	NaN	NaN	NaN	NaN	0.5034	0.265166
48	NaN	0.24708	NaN	NaN	NaN	NaN	NaN	NaN	0.236772	NaN			0.466287	0.627524	0.686451	0.538109	0.817209	NaN	NaN	0.55739	0.409143	NaN	0.528059	NaN	NaN	NaN	NaN	NaN	0.466142	0.631543	0.450971	0.429042	NaN	NaN	NaN
49	NaN	NaN	NaN	NaN	NaN	NaN	NaN	NaN	NaN	NaN			0.5355	0.64379	0.571114	0.732533	0.603324	0.65854	NaN	0.593342	0.499846	0.402729	0.652149	0.676965	NaN	0.357146	NaN	0.349126	0.613969	0.651528	NaN	0.577953	0.345305	NaN	NaN
50	NaN	0.203736	NaN	NaN	NaN	NaN	NaN	NaN	NaN	NaN			NaN	0.64408	NaN	NaN	NaN	NaN	0.513362	0.595002	0.491801	0.540991	0.701647	NaN	NaN	0.592644	NaN	NaN	0.73878	NaN	0.427267	0.487297	NaN	NaN	0.452511
51	NaN	0.250917	NaN	NaN	NaN	NaN	NaN	NaN	NaN	NaN			NaN	0.562146	0.625425	0.586291	NaN	0.741068	NaN	0.654619	0.315472	NaN	0.526882	NaN	NaN	0.654646	0.585744	0.724395	NaN	NaN	NaN	NaN	0.561155	0.567075	0.245268
52	NaN	NaN	NaN	NaN	NaN	NaN	NaN	NaN	NaN	NaN			NaN	0.720047	NaN	0.586417	0.70884	0.676622	0.641611	NaN	NaN	NaN	NaN	0.731481	0.647522	0.52626	0.436183	0.790051	NaN	0.689516	NaN	0.658399	0.466126	NaN	NaN
53	NaN	NaN	NaN	NaN	NaN	NaN	NaN	NaN	NaN	NaN			0.904498	0.648654	0.628248	0.637959	0.626926	NaN	0.428641	NaN	NaN	NaN	NaN	0.481796	NaN	NaN	0.607234	0.91132	0.40929	NaN	NaN	NaN	0.590817	NaN	NaN
54	NaN	NaN	NaN	NaN	NaN	NaN	NaN	NaN	NaN	NaN			0.766367	0.541899	0.567654	NaN	0.767949	NaN	0.542569	0.694866	NaN	0.547872	0.410936	NaN	0.488677	0.649515	0.476389	0.827307	NaN	NaN	0.668973	NaN	NaN	NaN	NaN
55	NaN	NaN	NaN	NaN	NaN	NaN	NaN	NaN	NaN	NaN			NaN	0.806678	0.623117	NaN	NaN	NaN	NaN	NaN	NaN	0.4576	NaN	0.592302	NaN	NaN	NaN	0.772487	0.487442	NaN	NaN	0.518363	NaN	0.621193	NaN
56	NaN	NaN	NaN	NaN	NaN	NaN	NaN	NaN	NaN	NaN			NaN	0.553055	0.424514	0.631969	0.710891	NaN	0.63458	0.538489	0.537755	0.507455	NaN	NaN	NaN	NaN	0.333105	NaN	0.593827	0.637741	0.45666	0.489726	0.479617	0.578909	0.344332
57	NaN	NaN	NaN	NaN	NaN	NaN	NaN	NaN	NaN	NaN			NaN	0.821431	NaN	NaN	NaN	0.714726	NaN	0.518008	0.594693	NaN	0.479702	0.50987	NaN	0.704651	0.467931	0.793778	0.889323	0.628848	NaN	NaN	NaN	0.599889	0.290569
58	NaN	NaN	NaN	NaN	NaN	NaN	NaN	NaN	NaN	NaN			1.00111	NaN	0.741168	0.633521	0.686626	0.724069	NaN	NaN	0.385843	0.566107	NaN	NaN	NaN	0.393264	0.567959	0.589876	NaN	NaN	0.491081	0.549912	0.729557	0.499861	0.248348
59	NaN	NaN	NaN	NaN	NaN	NaN	NaN	NaN	NaN	NaN			0.796404	NaN	0.836808	NaN	NaN	0.724244	0.552617	NaN	NaN	NaN	0.487063	NaN	0.581782	0.650999	0.589457	0.637916	NaN	NaN	0.334728	NaN	0.497669	NaN	0.230139
60	NaN	NaN	NaN	NaN	NaN	NaN	NaN	NaN	NaN	NaN			0.983251	NaN	NaN	NaN	0.605514	0.700936	NaN	NaN	0.432694	0.43608	0.56901	NaN	0.569282	0.518651	0.525191	0.778949	NaN	0.625096	0.471468	0.676597	0.542366	NaN	0.514127

## Sheet: 1Fii
Figure 1Fii
	VTA axon velocity binned F										LC axon velocity binned F
bin number	1	2	3	4	5	6	7	8	9		1	2	3	4	5	6	7	8	9	10	11	12	13	14	15	16	17	18	19	20	21	22	23	24	25	26	27	28	29	30	31	32	33	34	35	36	37	38	39
1	0.449027	0.270766	0.503409	0.292712	0.427625	0.473908	0.421346	0.487267	0.488502		0.325942	0.155256	0.301006	0.414986	0.442965	0.349864	0.376049	0.362953	0.398325	0.391009	0.396271	0.314645	0.376176	0.375076	0.390722	0.253014	0.219474	0.323818	0.42606	0.365716	0.404093	0.346203	0.406575	0.307138	0.380753	0.365699	0.32883	0.38153	0.385204	0.352808	0.376292	0.342791	0.341877	0.329198	0.341897	0.531454	0.3786	0.395391	0.371008
2	0.410596	0.298321	0.472439	0.313508	0.43096	0.458476	0.413991	0.477755	0.521583		0.32535	0.167216	0.315378	0.398729	0.440901	0.343736	0.387513	0.360805	0.402334	0.423207	0.39985	0.309108	0.358497	0.380666	0.387884	0.272973	0.196169	0.362851	0.405695	0.374696	0.423133	0.390936	0.418815	0.325435	0.396206	0.379938	0.328218	0.344595	0.380465	0.351161	0.387244	0.380189	0.345616	0.321687	0.32911	0.537461	0.361623	0.395558	0.376071
3	0.442236	0.312948	0.432566	0.341038	0.447305	0.435357	0.429141	0.488942	0.511272		0.345796	0.169445	0.320582	0.389476	0.452302	0.330742	0.394659	0.377187	0.395034	0.407001	0.429229	0.299854	0.375604	0.344434	0.406797	0.262843	0.203768	0.376263	0.427233	0.359546	0.461875	0.433373	0.379643	0.383163	0.400054	0.386693	0.343957	0.385859	0.384322	0.375689	0.371599	0.382441	0.361039	0.34815	0.367374	0.515394	0.393422	0.378125	0.413077
4	0.433843	0.336987	0.351947	0.29559	0.430617	0.390751	0.459531	0.499792	0.539575		0.396593	0.256924	0.371237	0.440479	0.489558	0.372767	0.381769	0.427459	0.406831	0.419892	0.412494	0.296963	0.402901	0.376984	0.372996	0.282645	0.201689	0.441358	0.439773	0.4103	0.494305	0.482391	0.392279	0.449053	0.445724	0.436282	0.365377	0.411343	0.389034	0.373487	0.405938	0.358997	0.434904	0.354253	0.42085	0.54782	0.376997	0.463299	0.432791
5	0.437018	0.303804	0.247211	0.280264	0.420756	0.375627	0.421506	0.443431	0.45712		0.310518	0.274314	0.395158	0.414165	0.54756	0.444609	0.408917	0.417096	0.429154	0.435787	0.471535	0.286466	0.38011	0.332757	0.367621	0.261214	0.20863	0.346926	0.379414	0.402656	0.52967	0.597878	0.49797	0.481262	0.413783	0.398661	0.346947	0.428018	0.425227	0.432786	0.454827	0.467494	0.532524	0.439137	0.501759	0.478906	0.446227	0.389579	0.547413
6	0.466157	0.436975	0.579244	0.27441	0.421848	0.449986	0.44856	0.446364	0.588044		0.321733	0.310942	0.442854	0.429165	0.519098	0.407903	0.413503	0.451145	0.421597	0.489449	0.496271	0.310019	0.378154	0.373698	0.349395	0.261696	0.206147	0.30152	0.399879	0.40765	0.429488	0.401032	0.33887	0.395053	0.406923	0.38107	0.411493	0.541831	0.562904	0.563406	0.573724	0.536377	0.521189	0.452002	0.522226	0.533938	0.545711	0.465062	0.565803
7	0.53515	0.365692	0.41618	0.281126	0.505842	0.361301	0.443056	0.505182	0.604402		0.328632	0.334803	0.37606	0.490841	0.495151	0.458892	0.452981	0.511196	0.496355	0.532207	0.571828	0.353853	0.407253	0.376132	0.365132	0.276187	0.237822	0.362221	0.348878	0.454926	0.456219	0.481071	0.37499	0.44978	0.416608	0.402384	0.40156	0.520676	0.59815	0.650755	0.631934	0.563124	0.500121	0.468915	0.525616	0.485036	0.517704	0.454528	0.575889
8	0.396651	0.443974	0.535227	0.260207	0.499142	0.597126	0.406641	0.462622	0.665892		0.348674	0.355936	0.411126	0.469913	0.476128	0.444622	0.497004	0.414592	0.483555	0.471614	0.405289	0.371132	0.445102	0.314198	0.438518	0.34439	0.244383	0.420925	0.366441	0.408788	0.526968	0.477477	0.375565	0.488306	0.345646	0.337462	0.422691	0.511068	0.583168	0.690898	0.625471	0.577333	0.542609	0.376298	0.488397	0.528305	0.560351	0.399826	0.538065
9	0.439483	0.394996	0.58534	0.308323	0.462361	0.561689	0.435273	0.459673	0.559768		0.396322	0.411145	0.419268	0.510782	0.460541	0.497565	0.47324	0.489272	0.476056	0.416008	0.437049	0.361533	0.547097	0.357282	0.383208	0.297345	0.298654	0.423924	0.337384	0.448828	0.439798	0.376458	0.316454	0.405973	0.41296	0.380674	0.389834	0.560647	0.54977	0.650297	0.654705	0.613511	0.610962	0.482987	0.590908	0.501446	0.508493	0.418603	0.681793
10	0.401172	0.443565	0.665613	0.338592	0.436835	0.359762	0.445114	0.566249	0.572447		0.35733	0.434016	0.442039	0.489051	0.5572	0.543057	0.479215	0.55996	0.50198	0.550722	0.467997	0.402926	0.520716	0.386668	0.563697	0.361281	0.277074	0.387718	0.362788	0.427115	0.478406	0.428488	0.364914	0.487652	0.435956	0.407921	0.400726	0.526801	0.586324	0.740572	0.67274	0.651287	0.483095	0.385321	0.486544	0.520634	0.604662	0.501301	0.49535
11	0.393983	0.4309	0.687681	0.336494	0.499916	0.316399	0.397156	0.532727	0.536479		0.291148	0.424942	0.373888	0.51409	0.640368	0.64781	0.53495	0.476725	0.60718	0.544634	0.327203	0.397142	0.422448	0.58104	0.461501	0.373249	0.327754	0.377438	0.389749	0.398257	0.420785	0.489178	0.427562	0.438431	0.480537	0.473658	0.435955	0.542493	0.588436	0.706689	0.645848	0.542435	0.72129	0.510082	0.710709	0.446341	0.489941	0.463867	0.594237
12	0.344999	0.467074	0.722367	0.298976	0.505855	0.446177	0.41082	0.467024	0.576682		0.420513	0.464611	0.45047	0.56537	0.510822	0.580774	0.508583	0.575751	0.493996	0.55962	0.436487	0.379029	0.435292	0.461975	0.488119	0.47265	0.370327	0.412021	0.403053	0.491688	0.483439	0.479613	0.376636	0.428142	0.399762	0.397102	0.416338	0.480292	0.600153	0.634583	0.668379	0.633836	0.590325	0.519032	0.555438	0.461658	0.523601	0.452232	0.548245
13	0.329034	0.443638	0.647151	0.30581	0.481542	0.422473	0.409811	0.413016	0.447865		0.334919	0.470693	0.45905	0.59212	0.549557	0.637348	0.527259	0.600044	0.613753	0.5421	0.461858	0.395944	0.394718	0.566817	0.415443	0.359742	0.378427	0.397521	0.354874	0.495167	0.372669	0.409462	0.399709	0.449963	0.438272	0.454973	0.430397	0.558782	0.554642	0.665804	0.628521	0.583061	0.579292	0.488922	0.52987	0.306429	0.622356	0.414942	0.578718
14	0.321147	0.542811	0.654044	0.366717	0.439229	0.480298	0.424632	0.344736	0.422166		0.318693	0.454927	0.440042	0.548917	0.526975	0.510682	0.401635	0.540215	0.49903	0.54619	0.425233	0.408757	0.427453	0.378964	0.434964	0.389514	0.392228	0.387812	0.318959	0.491425	0.431046	0.484484	0.400563	0.320782	0.447292	0.425484	0.456221	0.567701	0.6054	0.674335	0.614394	0.576556	0.435155	0.444725	0.588306	0.478926	0.557239	0.360296	0.634436
15	0.308632	0.453956	0.586551	0.31865	0.542015	0.599945	0.415578	0.446701	0.460041		0.411837	0.484637	0.45066	0.541182	0.576831	0.526938	0.446169	0.563927	0.616344	0.502262	0.454055	0.417317	0.425764	0.482123	0.406361	0.276592	0.42342	0.36949	0.340489	0.491626	0.425136	0.326328	0.342829	0.328114	0.408403	0.398759	0.526771	0.530319	0.580261	0.640686	0.627435	0.622299	0.657134	0.508256	0.606275	0.45472	0.702694	0.394584	0.629827
16	0.400271	0.522773	0.363142	0.384457	0.49749	0.644606	0.419043	0.467592	0.473217		0.331404	0.437306	0.428783	0.565202	0.599016	0.634323	0.466687	0.510268	0.492459	0.497285	0.448572	0.406613	0.340014	0.514881	0.526251	0.44603	0.373163	0.356569	0.335552	0.490279	0.439798	0.388363	0.32969	0.406945	0.456332	0.445734	0.41415	0.57354	0.548031	0.650992	0.614198	0.595641	0.566481	0.464179	0.62018	0.32403	0.611929	0.369666	0.511119
17	0.384468	0.468698	0.521068	0.362056	0.484756	0.502967	0.418151	0.440046	0.401062		0.391498	0.498024	0.426227	0.528571	0.658347	0.757812	0.415338	0.578269	0.705748	0.424706	0.782767	0.424634	0.602564	0.468323	0.48099	0.327139	0.391304	0.353106	0.321415	0.46484	0.439338	0.404932	0.358151	0.459386	0.422061	0.418929	0.47137	0.548453	0.512692	0.655109	0.626893	0.546624	0.512993	0.496191	0.510404	0.411173	0.539185	0.454701	0.540098
18	0.30603	0.476616	0.426581	0.341229	0.412889	0.564872	0.418676	0.367509	0.467786		0.375483	0.433779	0.428645	0.51426	0.722809	0.661519	0.604664	0.629625	0.551866	0.544689	0.464347	0.350053	0.481023	0.504504	0.453571	0.389356	0.413806	0.387582	0.331951	0.495131	0.420479	0.388464	0.367709	0.41612	0.432786	0.421089	0.411936	0.54412	0.538197	0.666599	0.628313	0.507036	0.56978	0.494789	0.533052	0.525255	0.515403	0.456139	0.471606
19	0.385617	0.473259	0.481082	0.302041	0.474673	0.604614	0.417634	0.456205	0.460034		0.321004	0.510622	0.432877	0.526993	0.455966	0.651099	0.537101	0.4764	0.769698	0.462884	0.691466	0.407866	0.453991	0.479166	0.537229	0.3941	0.447419	0.387058	0.331652	0.511389	0.440751	0.353673	0.438111	0.387297	0.502761	0.502235	0.464214	0.544999	0.557843	0.656733	0.657816	0.596498	0.622408	0.393218	0.528999	0.411283	0.538834	0.420773	0.50131
20	0.451534	0.395519	0.412597	0.325124	0.504817	0.602662	0.416658	0.409062	0.431116		0.346107	0.513114	0.381576	0.489441	0.650319	0.596881	0.56913	0.453785	0.560555	0.548559	0.448114	0.423117	0.500601	0.455384	0.420179	0.36183	0.404099	0.391045	0.356696	0.475148	0.430473	0.348409	0.372507	0.351373	0.431546	0.435484	0.488715	0.525549	0.561353	0.679996	0.678764	0.644293	0.571806	0.399775	0.568579	0.385509	0.568749	0.412277	0.51706
21	0.382356	0.488159	0.460241	0.324325	0.489064	0.58671	0.423384	0.482291	0.532745		0.460647	0.511921	0.442405	0.537548	0.606858	0.554803	0.701278	0.529646	0.570791	0.511516	0.599022	0.46578	0.418325	0.585714	0.377189	0.411147	0.435615	0.320162	0.327744	0.47686	0.401825	0.40752	0.370425	0.393192	0.425286	0.41807	0.444733	0.541392	0.592575	0.694904	0.590781	0.601165	0.595676	0.381491	0.651622	0.397009	0.591621	0.389828	0.46476
22	0.406006	0.4372	0.517278	0.358963	0.538235	0.593296	0.415198	0.481081	0.547924		0.343663	0.47437	0.404635	0.467336	0.661738	0.654829	0.620399	0.567676	0.667734	0.465792	0.460347	0.445324	0.402669	0.456832	0.520529	0.378797	0.500822	0.357065	0.295909	0.424005	0.452346	0.545215	0.409019	0.388435	0.419494	0.408948	0.401395	0.525337	0.622914	0.614007	0.68437	0.498109	0.515151	0.422025	0.530594	0.511067	0.566616	0.433664	0.593202
23	0.421968	0.465626	0.443287	0.293829	0.479693	0.589129	0.423451	0.435408	0.562533		0.343597	0.462226	0.422259	0.526756	0.522095	0.56539	0.545631	0.303193	0.463717	0.700952	0.478929	0.453709	0.457278	0.529453	0.384261	0.405285	0.528993	0.375418	0.303607	0.466258	0.464967	0.459472	0.374298	0.420958	0.479185	0.471147	0.470646	0.530206	0.539077	0.65532	0.609318	0.576361	0.527494	0.494056	0.450157	0.46444	0.651251	0.346777	0.526613
24	0.429097	0.438535	0.424626	0.288983	0.486638	0.506286	0.441392	0.650044	0.458137		0.345786	0.511163	0.441904	0.542379	0.739373	0.790535	0.726294	0.615416	0.585182	0.6456	0.584043	0.452122	0.508751	0.550465	0.343306	0.407166	0.466537	0.383036	0.315302	0.462041	0.447507	0.435873	0.364813	0.439873	0.473161	0.467968	0.465227	0.543284	0.568954	0.687873	0.627133	0.571359	0.537888	0.427928	0.586231	0.387903	0.584046	0.428172	0.586168
25	0.44679	0.499597	0.375974	0.313433	0.485279	0.46181	0.45431	0.649919	0.515184		0.407545	0.512518	0.413695	0.47823	0.735753	0.750154	0.484057	0.608588	0.517374	0.521813	0.668432	0.506947	0.376556	0.525897	0.350817	0.445689	0.508964	0.332194	0.318195	0.512358	0.475089	0.452227	0.393214	0.442918	0.469412	0.45146	0.427848	0.533064	0.584679	0.569658	0.555076	0.538172	0.550395	0.492338	0.590864	0.383929	0.591709	0.427388	0.482864
26	0.397061	0.494121	0.428999	0.313202	0.436176	0.501808	0.514628	0.38509	0.392942		0.371464	0.483131	0.381622	0.475631	0.740673	0.467544	0.374182	0.489753	0.429413	0.545542	0.37196	0.504875	0.519486	0.571631	0.386959	0.364638	0.476736	0.36982	0.341924	0.476741	0.464446	0.474952	0.441488	0.468634	0.485195	0.456838	0.453166	0.525066	0.571481	0.75167	0.696434	0.553016	0.571468	0.381472	0.565255	0.36454	0.539413	0.427902	0.470819
27	0.412064	0.485863	0.299576	0.274609	0.485039	0.438593	0.462112	0.60785	0.564434		0.372784	0.482409	0.490914	0.55793	0.635859	0.545544	0.570056	0.650641	0.618961	0.522975	0.579465	0.524318	0.421983	0.615113	0.341025	0.552056	0.510446	0.393277	0.351938	0.502583	0.463662	0.442223	0.363123	0.475058	0.44383	0.423341	0.499125	0.507231	0.662558	0.759867	0.55914	0.64965	0.563494	0.438722	0.640886	0.318119	0.611266	0.39173	0.57401
28	0.417069	0.460256	0.3505	0.280846	0.48382	0.406127	0.454463	0.583322	0.508819		0.425033	0.540965	0.437874	0.462774	0.380162	0.599803	0.45701	0.415505	0.755928	0.608851	0.550617	0.415657	0.538459	0.556474	0.285984	0.531533	0.530609	0.451753	0.376556	0.533222	0.410091	0.490681	0.441879	0.483924	0.454098	0.433858	0.496263	0.4936	0.589374	0.72197	0.65629	0.712416	0.544019	0.487123	0.600897	0.37309	0.498498	0.384878	0.545275
29	0.472753	0.532965	0.267654	0.280714	0.514112	0.443916	0.484463	0.454413	0.529156		0.374919	0.546165	0.47317	0.499785	0.727919	0.636278	0.566809	0.729775	0.700914	0.626321	0.602941	0.500739	0.367417	0.486478	0.486398	0.398974	0.526192	0.416624	0.282862	0.525575	0.349736	0.450014	0.445752	0.421748	0.511538	0.501633	0.605261	0.53193	0.5206	0.68877	0.690013	0.609755	0.632902	0.451584	0.576643	0.421377	0.601731	0.498371	0.438243
30	0.459302	0.475505	0.390769	0.321511	0.459397	0.320799	0.477097	0.460488	0.483988		0.329415	0.495923	0.419489	0.518849	0.596662	0.669371	0.671156	0.56301	0.600954	0.401822	0.480774	0.49981	0.417816	0.493778	0.438163	0.430153	0.554887	0.425841	0.34155	0.529713	0.438622	0.490886	0.486552	0.47594	0.443245	0.429589	0.50746	0.594346	0.609152	0.673239	0.631385	0.662012	0.522479	0.404243	0.637772	0.482629	0.594492	0.38323	0.476312
31	0.386758	0.519433	0.368677	0.299607	0.41835	0.299611	0.515417	0.466532	0.396252		0.364744	0.512877	0.444512	0.456906	0.648949	0.456344	0.677461	0.577747	0.352619	0.660995	0.395507	0.48927	0.554451	0.520978	0.466437	0.420572	0.486954	0.40393	0.315305	0.522014	0.42821	0.506732	0.49215	0.480604	0.395075	0.381389	0.556948	0.554607	0.605808	0.647401	0.757889	0.624695	0.609305	0.493426	0.631408	0.395862	0.491766	0.392474	0.536683
32	0.449441	0.465388	0.346861	0.333184	0.482306	0.423089	0.500728	0.393212	0.455724		0.375216	0.53599	0.44916	0.542324	0.684145	0.627391	0.818609	0.500301	0.474097	0.487769	0.484085	0.542146	0.422256	0.424863	0.292421	0.356641	0.489193	0.387853	0.266161	0.523354	0.410735	0.465654	0.450005	0.424369	0.462708	0.451615	0.633647	0.550784	0.558299	0.608364	0.585556	0.532071	0.516135	0.606271	0.546698	0.378621	0.519709	0.392903	0.550948
33	0.475609	0.488646	0.404243	0.289553	0.481738	NaN	0.480845	0.412437	0.38491		0.414816	0.500344	0.437355	0.455802	0.765804	0.628626	0.666525	0.545787	0.575183	0.522263	0.598037	0.569081	0.515033	0.646669	0.403956	0.53421	0.63272	0.444722	0.300904	0.530667	0.331468	0.528737	0.485148	0.487056	0.453301	0.437093	0.521706	0.551052	0.616439	0.633499	0.645116	0.709239	0.572447	0.408669	0.621746	0.388666	0.4731	0.39153	0.533497
34	0.499842	0.530413	0.205836	0.28724	0.451952	NaN	0.487065	0.35321	0.393534		0.37002	0.569712	0.439617	0.487375	0.477316	0.478468	0.581894	0.743915	0.62149	0.524673	0.455572	0.518084	0.632666	0.568761	0.452148	0.513354	0.533891	0.566882	0.246035	0.868504	0.463211	0.523779	0.507586	0.45859	0.479862	0.463622	0.669533	0.600094	0.605663	0.67505	0.560293	0.445517	0.595305	0.461859	0.557644	0.38034	0.574198	0.34469	0.563524
35	0.403323	0.588008	0.27527	0.27222	0.45392	NaN	0.471623	0.425084	0.344963		0.437197	0.523471	0.480483	0.441767	0.726366	0.715271	0.648971	0.618938	0.599999	0.51224	0.659704	0.485273	0.663874	0.691063	0.260917	0.664535	0.589767	0.468254	0.354915	0.591639	0.432795	0.543366	0.491934	0.508139	0.475918	0.459628	0.661135	0.581367	0.61162	0.718309	0.827887	0.506391	0.512826	0.444628	0.466321	0.578144	0.56996	0.401807	0.542072
36	0.449855	0.556792	0.395331	0.267043	0.448278	NaN	0.425773	0.376817	0.316201		0.395761	0.508334	0.417364	0.457556	0.691866	0.859686	0.578674	0.829952	0.499885	0.38665	0.432844	0.550695	0.563094	0.484002	0.432219	0.418527	0.529818	0.494311	0.374338	0.519565	0.338664	0.544627	0.497729	0.450895	0.476179	0.459571	0.513721	0.56705	0.685206	0.753472	0.637046	0.673707	0.639794	0.491564	0.71015	0.402557	0.666065	0.379716	0.49328
37	0.505381	0.494803	0.268527	0.278096	0.44019	NaN	0.475183	0.417112	0.399309		0.367378	0.519504	0.424535	0.473693	0.64144	0.654128	0.625807	0.630638	0.658438	0.465667	0.606997	0.431058	0.391137	0.578291	0.366657	0.63068	0.628517	0.347617	0.387206	0.550189	0.508539	0.50051	0.469499	0.465451	0.399291	0.377302	0.682108	0.519152	0.729419	0.707895	0.744727	0.602922	0.549444	0.496647	0.64489	0.401598	0.518726	0.504248	0.398699
38	0.475382	0.524522	0.20246	0.264375	0.446716	NaN	0.429641	0.489874	0.240706		0.44611	0.508318	0.429662	0.560863	0.56851	0.580212	0.614754	0.554662	0.438735	0.489667	0.62632	0.479859	0.552028	0.5705	0.409125	0.392236	0.543076	0.308882	0.364316	0.615158	0.710985	0.526552	0.418529	0.466904	0.516129	0.50367	0.626723	0.602484	0.55481	0.755075	0.577521	0.678406	0.588822	0.529793	0.623891	0.419559	0.604051	0.424641	0.43213
39	0.475685	0.615461	0.233164	0.274081	0.409513	NaN	0.500039	0.296355	0.384326		0.424987	0.547928	0.525698	0.511609	0.67065	0.625539	0.574768	0.575511	0.472193	0.553141	0.589009	0.480194	0.617974	0.398057	0.427022	0.366564	0.543693	NaN	NaN	NaN	NaN	0.551993	0.528645	0.477423	0.490043	0.472946	0.473025	0.545852	0.587564	0.794551	0.744484	0.548735	0.55568	0.464956	0.583696	0.465375	0.690642	0.480399	0.626652
40	0.487229	0.537909	0.319712	0.267188	0.42829	NaN	0.40472	0.106028	0.261051		0.421202	0.541073	0.416552	0.569041	0.739869	0.628082	0.538162	0.567298	0.494264	0.511122	0.546517	0.487529	0.566319	0.622529	0.414123	0.394806	0.664482	NaN	NaN	NaN	NaN	0.418881	0.512076	0.391604	0.357141	0.335462	0.438394	0.508347	0.639859	0.697857	0.647391	0.470744	0.466484	0.472585	0.487708	0.358265	0.48846	0.402924	0.404961
41	0.435135	0.642264	0.285492	0.24824	0.438303	NaN	0.400831	0.567689	0.2464		0.298573	0.563032	0.467101	0.4678	0.824816	0.643102	0.451566	0.485306	0.53979	0.562485	0.655407	0.452794	0.46237	0.525604	0.420328	0.452625	0.508606	NaN	NaN	NaN	NaN	0.553621	0.583647	0.489133	0.49103	0.475881	0.632908	0.58641	0.641314	0.688616	0.54874	0.598486	0.435018	0.499813	0.39447	0.338212	0.622145	0.387598	0.536722
42	0.552899	0.544078	0.154518	0.256305	0.448814	NaN	0.590953	NaN	NaN		0.436825	0.563241	0.432552	0.463526	0.729033	0.505777	0.549251	0.359994	0.53266	0.550605	0.604983	0.589583	0.612941	0.575666	0.358798	0.616854	0.560298	NaN	NaN	NaN	NaN	0.579645	0.488883	0.466729	0.499913	0.476834	0.601527	0.547075	0.59598	0.665904	0.595663	0.543065	0.483395	0.581406	0.5986	0.437894	0.536863	0.398349	0.703719
43	0.531247	0.556684	0.272313	0.283962	0.394033	NaN	NaN	NaN	NaN		0.459487	0.674584	0.400466	0.439521	0.604539	0.709745	0.703354	0.685408	0.558746	0.490576	0.523581	0.477349	0.613153	0.57624	0.366659	0.561582	0.570984	NaN	NaN	NaN	NaN	0.567947	0.60734	0.461092	0.589832	0.579532	0.53209	0.480687	0.644019	0.706	0.684478	0.589187	0.619508	0.467681	0.461009	0.310791	0.659424	0.457027	0.520431
44	0.5014	0.762842	0.360472	0.270291	0.428858	NaN	0.282608	NaN	NaN		0.392038	0.60421	0.436956	0.553337	0.753786	0.650474	0.452354	0.577019	0.416081	0.44882	0.619674	0.509415	0.34039	0.692158	0.395643	0.55588	0.534285	NaN	NaN	NaN	NaN	0.500898	0.694853	0.650035	0.596675	0.638335	0.599105	0.553937	0.64971	0.773687	0.730502	0.532178	0.458389	0.376024	0.531203	0.407568	0.532113	0.178626	0.564941
45	0.535823	0.763134	0.268128	0.249405	0.463259	NaN	NaN	NaN	NaN		0.358222	0.510739	0.430888	0.57519	0.739765	0.610816	0.728125	0.639127	0.517338	0.575021	0.487008	0.544828	0.495151	0.495476	0.378158	0.487489	0.610752	NaN	NaN	NaN	NaN	0.341774	0.319277	0.243072	0.541183	0.530427	0.571381	0.591025	0.522145	0.602961	0.602014	0.598188	0.597401	0.49776	0.456142	0.236218	0.472355	0.285881	0.546939
46	0.547424	0.663944	0.458944	0.248774	0.42264	NaN	NaN	NaN	NaN		0.386772	0.522391	0.542418	0.370445	0.707032	0.689761	0.815481	0.676604	0.451553	0.507742	0.572184	0.487891	0.498911	0.405778	0.457813	0.580609	0.578879	NaN	NaN	NaN	NaN	NaN	NaN	NaN	NaN	NaN	0.559674	0.548423	0.55284	0.777528	0.62249	0.687046	0.431336	0.418631	0.46391	0.363573	0.486133	0.29712	0.505641
47	0.53988	0.763995	0.294966	0.240733	0.43578	0.933652	NaN	NaN	NaN		0.388125	0.589852	0.484418	0.53141	0.637977	0.704204	0.634976	0.681488	0.528478	0.601068	0.542566	0.463451	0.603585	0.59785	0.283922	0.492407	0.52795	NaN	NaN	NaN	NaN	NaN	NaN	NaN	NaN	NaN	0.630599	0.674706	0.52722	0.643965	0.618467	0.407943	0.636336	0.521661	0.526241	0.326438	0.614942	0.480705	0.436258
48	0.559591	NaN	0.241926	0.257014	0.419044	NaN	NaN	NaN	NaN		0.319945	0.550656	0.476281	0.607079	0.734709	0.611643	0.663371	0.66106	0.486664	0.521531	0.617971	0.456982	0.519228	0.578178	0.367249	0.580481	0.600189	NaN	NaN	NaN	NaN	NaN	NaN	NaN	NaN	NaN	0.502996	0.571533	0.736959	0.692413	0.672248	0.72258	0.597562	0.489453	0.507001	0.568356	0.653091	0.382581	0.499949
49	0.595639	NaN	NaN	0.231595	0.365274	NaN	NaN	NaN	NaN		0.432918	0.556756	0.41579	0.325892	0.722131	0.684041	0.548086	0.557528	0.522671	0.536012	0.451342	0.582196	0.566127	0.564948	0.455376	0.441763	0.611597	NaN	NaN	NaN	NaN	NaN	NaN	NaN	NaN	NaN	0.483445	0.573611	0.644181	0.73288	0.693655	0.691066	0.462135	0.378643	0.433557	0.367495	0.339476	0.458831	0.386553
50	0.425216	NaN	0.203736	0.244348	0.388317	NaN	NaN	NaN	NaN		0.306356	0.562308	0.369273	0.426888	0.753192	0.772051	0.683666	0.564611	0.504766	0.40006	0.457498	0.484443	0.595817	0.696153	0.417194	0.396761	0.61285	NaN	NaN	NaN	NaN	NaN	NaN	NaN	NaN	NaN	0.54704	0.534978	0.503525	0.652496	0.622768	0.560994	0.523887	0.369768	0.48299	0.305396	0.740513	0.445283	0.581155
51	0.526321	NaN	0.250917	0.258219	0.421723	NaN	NaN	NaN	NaN		0.441116	0.565399	0.463909	0.373223	0.631509	0.636471	0.605481	0.718242	0.598883	0.62999	0.429593	0.458599	0.53336	0.506087	0.380088	0.494352	0.614705	NaN	NaN	NaN	NaN	NaN	NaN	NaN	NaN	NaN	0.606038	0.54589	0.576093	0.7196	0.673234	0.613091	0.493299	0.577902	0.566251	0.260216	0.584628	0.407719	0.481929
52	0.546206	NaN	NaN	0.232157	0.408638	1.10038	NaN	NaN	NaN		0.407148	0.636852	0.482247	0.333139	0.666979	0.823729	0.728609	0.536322	0.457278	0.392849	0.595185	0.353314	0.549141	0.460641	0.403779	0.461544	0.52139	NaN	NaN	NaN	NaN	NaN	NaN	NaN	NaN	NaN	0.583098	0.575069	0.621457	0.557132	0.613609	0.657505	0.499624	0.59478	0.587449	0.11115	0.53939	0.407549	0.491715
53	0.577274	NaN	NaN	0.212942	0.401156	NaN	NaN	NaN	NaN		0.443661	0.625035	0.427747	NaN	0.641021	0.627105	0.714056	0.632889	0.431067	0.609495	0.593646	0.512243	0.615303	0.407576	0.416817	0.710558	0.627591	NaN	NaN	NaN	NaN	NaN	NaN	NaN	NaN	NaN	0.569187	0.647936	0.572429	0.615861	0.661277	0.620389	0.650966	0.550562	0.476606	0.213588	0.5701	0.383715	0.564832
54	NaN	NaN	NaN	0.234317	0.420115	NaN	NaN	NaN	NaN		0.380293	0.611613	0.491653	NaN	0.660458	0.770149	0.753965	0.696009	0.497309	0.625039	0.479477	0.483473	0.579828	0.507524	0.509437	0.606376	0.611952	NaN	NaN	NaN	NaN	NaN	NaN	NaN	NaN	NaN	0.540084	0.636134	0.586272	0.621463	0.414028	0.512651	0.655674	0.457563	0.46094	0.481344	0.625718	0.486243	0.426181
55	NaN	NaN	NaN	0.25431	0.383713	NaN	NaN	NaN	NaN		0.250561	0.609898	0.387761	NaN	0.635957	0.740376	0.824695	0.561578	0.378055	0.469857	0.569425	0.46281	0.444367	0.551512	0.325473	0.371875	0.552379	NaN	NaN	NaN	NaN	NaN	NaN	NaN	NaN	NaN	0.597314	0.55271	0.578783	0.55623	0.551501	0.519271	0.526966	0.494682	0.550313	0.191483	0.508144	0.280007	0.598249
56	NaN	NaN	NaN	0.271341	0.355582	NaN	NaN	NaN	NaN		0.44494	0.528289	0.517674	NaN	0.624198	0.79422	0.607508	0.667247	0.469186	0.49945	0.725225	0.536015	0.600481	0.750927	0.401047	0.446301	0.64267	NaN	NaN	NaN	NaN	NaN	NaN	NaN	NaN	NaN	0.472929	0.456192	0.654944	0.694305	0.619868	0.65969	0.519421	0.448281	0.731118	0.342499	0.552011	0.359248	0.698552
57	NaN	NaN	NaN	0.278031	0.323258	NaN	NaN	NaN	NaN		0.391543	0.616417	0.535169	NaN	0.84362	0.834305	0.536852	0.554556	0.63089	0.453716	0.485658	0.514293	0.479385	0.576448	0.376076	0.60936	0.617268	NaN	NaN	NaN	NaN	NaN	NaN	NaN	NaN	NaN	0.636371	0.596125	0.52519	0.636728	0.541976	0.658414	0.542498	0.504633	0.577291	0.293339	0.600297	0.489483	0.664912
58	NaN	NaN	NaN	0.220769	0.402324	NaN	NaN	NaN	NaN		0.417166	0.58722	0.487424	NaN	0.683694	0.644289	0.683138	0.893267	0.660176	0.609724	0.535656	0.475882	0.580796	0.470094	0.368757	0.477078	0.627977	NaN	NaN	NaN	NaN	NaN	NaN	NaN	NaN	NaN	0.561058	0.747906	0.489092	0.547524	0.591189	0.42877	0.668316	0.308642	0.613875	0.435164	0.43103	0.41291	0.577565
59	NaN	NaN	NaN	0.287648	0.37205	NaN	NaN	NaN	NaN		0.488274	0.576652	0.557953	NaN	0.425561	0.556065	0.626867	0.569293	0.66431	0.435229	0.640829	0.507677	0.536302	0.533327	0.459705	0.478044	0.627551	NaN	NaN	NaN	NaN	NaN	NaN	NaN	NaN	NaN	0.58456	0.552027	0.742132	0.837997	0.96069	0.55916	0.604486	0.352406	0.676901	0.309746	0.563772	0.416863	0.575253
60	NaN	NaN	NaN	0.268575	0.319477	NaN	NaN	NaN	NaN		0.352065	0.596614	0.46856	NaN	0.5231	0.681166	0.770576	1.01786	0.516422	0.589177	0.44362	0.496687	0.573926	0.65464	0.342887	0.60968	0.666674	NaN	NaN	NaN	NaN	NaN	NaN	NaN	NaN	NaN	0.627281	0.64747	NaN	NaN	NaN	NaN	0.695939	0.383521	0.459343	0.26864	0.648683	0.512371	0.583752
[truncated: 48 more columns]

## Sheet: 1F.iv
Figure 1 E.iv.
VTA roi	VTA axon Slope	R-squared		LC roi	LC axon Slope	R-squared
ROI 1	-0.0090363	0.43737		ROI 1	0.000930144	0.0111826
ROI 2	0.0172104	0.830174		ROI 2	0.0267843	0.949171
ROI 3	0.0243248	0.532975		ROI 3	0.0104926	0.683742
ROI 4	0.00254425	0.126175		ROI 4	0.0144288	0.871707
ROI 5	0.00420775	0.275624		ROI 5	0.00818287	0.3873
ROI 6	-0.000537229	0.000847339		ROI 6	0.0225119	0.799937
ROI 7	-0.00123738	0.0815354		ROI 7	0.00998271	0.534718
ROI 8	-0.00422046	0.111332		ROI 8	0.017143	0.803151
ROI 9	-0.00121526	0.00580947		ROI 9	0.0141595	0.690762
				ROI 10	0.0128916	0.716474
				ROI 11	0.000362616	0.000723745
				ROI 12	0.00955297	0.801688
				ROI 13	0.0065643	0.249261
				ROI 14	0.0104238	0.29204
				ROI 15	0.00743942	0.287756
				ROI 16	0.0130263	0.695699
				ROI 17	0.0159526	0.857219
				ROI 18	0.00377484	0.163216
				ROI 19	-0.00609271	0.493449
				ROI 20	0.00937157	0.724932
				ROI 21	-0.00149434	0.0190315
				ROI 22	0.00338647	0.0495486
				ROI 23	-0.00175901	0.0296398
				ROI 24	0.00435355	0.0873168
				ROI 25	0.00357541	0.205969
				ROI 26	0.00425951	0.245184
				ROI 27	0.00912214	0.833379
				ROI 28	0.0155714	0.715212
				ROI 29	0.0194899	0.729448
				ROI 30	0.0310838	0.760766
				ROI 31	0.0251117	0.751868
				ROI 32	0.0219378	0.728815
				ROI 33	0.0173978	0.441621
				ROI 34	0.0125306	0.581553
				ROI 35	0.020277	0.650339
				ROI 36	-0.00937091	0.406954
				ROI 37	0.0173094	0.693198
				ROI 38	0.00174165	0.0311196
				ROI 39	0.0176926	0.606033
				ROI 40	0.0126984	0.905413
				ROI 41	0.0229511	0.964566
				ROI 42	0.000847988	0.0121424
				ROI 43	0.0166976	0.657511
				ROI 44	0.015159	0.74523
				ROI 45	0.00613454	0.586417
				ROI 46	-0.00748392	0.296082
				ROI 47	0.00887162	0.495626
				ROI 48	0.0126044	0.847379
				ROI 49	0.00972674	0.543296
				ROI 50	0.0220484	0.907629
				ROI 51	0.0237004	0.811104
				ROI 52	0.0132085	0.800672
				ROI 53	0.0112632	0.629774
				ROI 54	0.00411092	0.204462
				ROI 55	0.00267377	0.15509
				ROI 56	0.0126388	0.590988
				ROI 57	0.00341424	0.325343
				ROI 58	0.0142134	0.591569
				ROI 59	0.0192272	0.846884
				ROI 60	0.0157568	0.852086
				ROI 61	0.00807303	0.682219
				ROI 62	0.0223566	0.845158
				ROI 63	0.0124497	0.601808
				ROI 64	0.0144119	0.745732
				ROI 65	0.0160669	0.847983
				ROI 66	0.010891	0.537429
				ROI 67	0.00710231	0.387193
				ROI 68	0.00014659	0.000137925
				ROI 69	0.00706078	0.357771
				ROI 70	0.0153478	0.488007
				ROI 71	0.00582529	0.227948
				ROI 72	0.0164684	0.672239
				ROI 73	0.0170942	0.605001
				ROI 74	0.0030103	0.161308
				ROI 75	0.00962084	0.70654
				ROI 76	0.0100013	0.826179
				ROI 77	0.0100235	0.657393
				ROI 78	0.00346478	0.225593
				ROI 79	0.00917233	0.809203
				ROI 80	0.00444187	0.441339
				ROI 81	0.00427973	0.499263
				ROI 82	-0.000568514	0.01231
				ROI 83	0.00135861	0.051173
				ROI 84	0.00581741	0.640066
				ROI 85	0.00657505	0.554125
				ROI 86	0.00858958	0.687164
				ROI 87	-0.000932732	0.0169923

## Sheet: 1Gi
Figure 1 Gii
	VTA motion intiation mean F					LC motion initiation mean F
time from motion onset	1	2	3	4		1	2	3	4	5	6	7	8	9	10	11	12	13	14	15	16	17	18
-1.93611	0.949919	0.828528	1.15516	1.11162		0.131202	0.0714898	0.0291922	0.0956773	0.270736	0.127432	0.189013	0.281883	0.0786369	0.0591081	0.19071	0.113272	0.257825	0.159836	0.0222781	0.274979	0.0182545	0.144243
-1.8393	0.630679	0.784363	0.471691	0.875149		0.0781801	0.0978128	0.0955906	0.121961	0.337333	0.143081	0.186479	0.217425	0.0147645	0.0655334	0.106776	0.040725	0.297199	0.103861	0.117047	0.178502	0.0665703	0.113929
-1.7425	0.423737	0.598957	0.578357	0.952712		0.141627	0.100505	0.147984	0.145417	0.214244	0.118958	0.171458	0.216216	0.17094	0.00134571	0.0408368	0.049877	0.266609	0.0406682	0.173684	0.118658	0.104783	0.0562856
-1.64569	0.71208	0.477181	0.577622	0.952628		0.191087	0.0399894	0.193375	0.159327	0.152725	0.128819	0.150195	0.216235	0.251185	0.0483746	0.0108861	0.222428	0.238389	0.206137	0.154057	0.13208	0.122788	0.0350437
-1.54889	0.542953	0.646195	0.905574	0.730639		0.212575	0.0356115	0.114244	0.168465	0.121991	0.155674	0.117743	0.21871	0.179572	0.151012	0.0148276	0.203346	0.214909	0.264762	0.162951	0.0950499	0.115158	0.0320025
-1.45208	0.403724	0.509252	0.677039	0.760782		0.278819	0.14351	0.0889327	0.140631	0.144398	0.147814	0.116063	0.223422	0.254783	0.182681	0.0357151	0.0884477	0.165959	0.109704	0.186106	0.0327935	0.0947107	0.13321
-1.35528	0.544928	0.634412	0.602797	0.669027		0.367442	0.151774	0.171259	0.0989227	0.150385	0.160312	0.175928	0.229253	0.403406	0.184411	0.156832	0.101194	0.104274	0.135188	0.126896	0.0971511	0.03488	0.177252
-1.25847	0.736747	0.368995	0.835804	0.68672		0.184235	0.110223	0.23726	0.0294677	0.123532	0.213525	0.16777	0.183509	0.294151	0.126262	0.210911	0.121214	0.102325	0.250945	0.0852997	0.155558	0.0194859	0.106961
-1.16167	0.429042	0.528059	0.699967	0.726845		0.0755979	0.160808	0.295099	0.0420335	0.121624	0.164351	0.125602	0.183854	0.239802	0.163007	0.130916	0.155781	0.116357	0.162125	0.0789286	0.202064	0.0929651	0.0303598
-1.06486	0.412733	0.652446	0.463353	0.798015		0.116101	0.200849	0.220175	0.0956097	0.132188	0.0639838	0.0688346	0.276376	0.295267	0.247199	0.113851	0.158082	0.162351	0.116863	0.0706526	0.224038	0.140858	-0.0493973
-0.968054	0.595446	0.554189	0.861204	0.32245		0.102434	0.219801	0.157153	0.105785	0.28468	0.0865496	0.0488998	0.223306	0.318154	0.174983	0.128251	0.144251	0.177884	0.15872	0.0614244	0.233747	0.175959	0.0473027
-0.871249	0.240456	0.489478	0.588385	0.632512		0.0616819	0.181576	0.117935	0.124227	0.320024	0.0940254	0.10263	0.0974406	0.324752	0.111415	0.207756	0.108613	0.178187	0.161054	0.0698891	0.147889	0.133696	0.0933667
-0.774443	0.729619	0.588582	0.596138	0.422954		0.219757	0.114763	0.130948	0.159203	0.121072	0.071321	0.133774	0.0456296	0.269662	0.0651437	0.229148	0.111175	0.169979	0.143625	0.0582449	0.104083	0.0942496	0.0381587
-0.677638	0.385617	0.217372	0.533109	0.449306		0.305324	0.0998702	0.170078	0.302382	0.0946351	0.0457679	0.153626	0.0365975	0.240014	0.0509526	0.134311	0.190137	0.1961	0.108499	0.00638262	0.144382	0.0604384	0.0403245
-0.580833	0.25406	0.455507	0.542215	0.393897		0.245875	0.11125	0.204335	0.499662	0.154456	0.0187905	0.0624908	0.113123	0.261251	0.0528015	0.128235	0.144552	0.290875	0.0643058	0.101264	0.111581	0.05693	0.0711772
-0.484027	0.628054	0.381965	0.570223	0.709735		0.259919	0.175173	0.255526	0.441551	0.227082	0.107967	0.0287198	0.161979	0.21615	0.151234	0.166539	0.0366931	0.318763	0.00197738	0.269517	0.0422305	0.0685729	0.104576
-0.387222	0.389293	0.168996	0.7229	0.555194		0.310708	0.190193	0.340584	0.380791	0.27225	0.158946	0.109678	0.197001	0.137878	0.198817	0.137811	0.185471	0.313206	0.0136955	0.196734	0.163631	0.0781747	0.138811
-0.290416	0.27481	0.280282	0.566708	0.340152		0.213896	0.180761	0.282482	0.314734	0.262501	0.13353	0.210081	0.198231	0.225014	0.144701	0.148949	0.257454	0.284437	0.0624368	0.133584	0.266691	0.0971304	0.174719
-0.193611	0.242263	0.370944	0.411877	0.468622		0.241963	0.105255	0.1528	0.286624	0.31702	0.207054	0.320205	0.20844	0.327752	0.1817	0.239819	0.175851	0.27719	0.164556	0.089702	0.333072	0.134794	0.313039
-0.0968054	0.341412	0.360907	0.2994	0.285346		0.519788	0.112544	0.299773	0.277486	0.403673	0.330049	0.293922	0.236604	0.461691	0.264257	0.225959	0.20097	0.312984	0.244307	0.109989	0.34695	0.193788	0.502565
-2.22045e-16	0.337834	0.341288	0.452344	0.584485		0.587754	0.285422	0.359412	0.293563	0.401189	0.293238	0.291458	0.238538	0.49787	0.389427	0.159734	0.279451	0.34952	0.27932	0.16236	0.334576	0.263448	0.391698
0.0968054	0.241084	0.285278	0.335847	0.21481		0.550792	0.34902	0.244383	0.32386	0.391515	0.280784	0.336633	0.227358	0.48517	0.433856	0.21535	0.5193	0.386427	0.320989	0.201405	0.40996	0.295454	0.320279
0.193611	0.280029	0.134121	0.51114	0.22225		0.572754	0.357979	0.288834	0.382598	0.367461	0.317044	0.352007	0.240814	0.316579	0.316802	0.303986	0.602209	0.40702	0.365986	0.255538	0.464418	0.345283	0.327752
0.290416	0.259396	0.138346	0.390287	0.163496		0.56936	0.387096	0.413027	0.417411	0.474368	0.300103	0.352479	0.274078	0.263283	0.319853	0.458661	0.371238	0.437438	0.400846	0.339846	0.477028	0.430762	0.332879
0.387222	0.20382	0.218601	0.452207	0.133967		0.515251	0.400717	0.503121	0.440262	0.646754	0.256563	0.410963	0.346957	0.440579	0.382955	0.565172	0.347873	0.487504	0.404499	0.411332	0.481946	0.46028	0.336833
0.484027	0.239176	0.325502	0.401452	0.177902		0.551682	0.383345	0.515757	0.500677	0.51795	0.387279	0.446056	0.384448	0.534331	0.563242	0.647601	0.428311	0.521308	0.345736	0.476407	0.483016	0.461819	0.431765
0.580833	0.243901	0.194386	0.219991	0.263451		0.633382	0.42222	0.373478	0.555719	0.479628	0.505581	0.434368	0.404246	0.58631	0.687987	0.488677	0.410724	0.54698	0.349126	0.40929	0.643741	0.417774	0.53589
0.677638	0.281757	0.274523	0.317668	0.333348		0.572559	0.489219	0.414294	0.600018	0.622268	0.599056	0.533319	0.365574	0.622808	0.701647	0.488935	0.447511	0.411147	0.383591	0.431007	0.777954	0.400775	0.658399
0.774443	0.353993	0.183891	0.304862	0.239981		0.510779	0.457178	0.546657	0.603324	0.728273	0.542569	0.68759	0.39862	0.654711	0.56901	0.807558	0.593043	0.359677	0.351812	0.630393	0.859146	0.437871	0.743346
0.871249	0.296244	0.221663	0.391612	0.195345		0.447085	0.432992	0.516998	0.586135	0.815961	0.411102	0.595534	0.575101	0.677424	0.363224	0.83283	0.581391	0.476935	0.373784	0.752526	0.769078	0.461608	0.809511
0.968054	0.148954	0.122656	0.333177	0.15723		0.363623	0.424514	0.489845	0.70884	0.750086	0.450754	0.576482	0.586105	0.585429	0.569288	0.711428	0.491147	0.510024	0.503259	0.836032	0.593381	0.478665	0.68786
1.06486	0.185107	0.157342	0.584332	0.202566		0.270278	0.66054	0.467703	0.767949	0.700936	0.493094	0.70344	0.514371	0.43608	0.652149	0.600557	0.654646	0.501028	0.550721	0.727372	0.678032	0.471468	0.580945
1.16167	0.168802	0.284466	0.425859	0.16447		0.334619	1.01882	0.540687	0.699864	0.685235	0.540812	0.706699	0.549317	0.420344	0.488604	0.540427	0.748897	0.467931	0.557176	0.654636	0.711097	0.462722	0.503501
1.25847	0.203839	0.183291	0.11234	0.132171		0.420463	0.929943	0.661233	0.673388	0.715461	0.552985	0.648109	0.568862	0.408072	0.454662	0.581782	0.704651	0.476389	0.517551	0.653747	0.640993	0.450878	0.565963
1.35528	0.0715066	0.127313	0.361166	0.151032		0.549314	0.793672	0.623888	0.667718	0.768651	0.547385	0.575999	0.557604	0.402729	0.485521	0.607751	0.650999	0.567959	0.513169	0.593827	0.623272	0.557467	0.698379
1.45208	0.0921925	0.168848	0.24791	0.0912034		0.629378	0.562609	0.586417	0.711554	0.916477	0.623946	0.538489	0.505389	0.410303	0.410936	0.626026	0.592644	0.621822	0.579273	0.504392	0.631742	0.723272	0.581338
1.54889	0.178655	0.196679	0.0899424	0.0157105		0.685048	0.520669	0.548694	0.783461	0.928273	0.63458	0.570181	0.432694	0.424336	0.428847	0.498559	0.62813	0.65683	0.516248	0.49808	0.544854	0.520554	0.487297
1.64569	0.152541	0.194821	0.0911802	0.0587742		0.764202	0.573292	0.614685	0.911507	0.668008	0.513362	0.576199	0.425597	0.48914	0.631753	0.415041	0.645125	0.427381	0.388658	0.513441	0.475811	0.416664	0.439257
1.7425	0.130411	0.0677954	0.195429	0.039272		0.774351	0.494298	0.732533	0.787576	0.604079	0.539637	0.569379	0.442914	0.498483	0.638887	0.419423	0.62514	0.333105	0.535905	0.572145	0.44246	0.510425	0.440227
1.8393	0.202302	0.0417616	0.261778	0.218219		0.646493	0.47375	0.646113	0.537658	0.638316	0.63966	0.550696	0.50906	0.396903	0.548136	0.534761	0.589053	0.509172	0.596056	0.534555	0.48632	0.500508	0.465701
1.93611	0.170677	0.207016	0.0753551	0.0972069		0.566557	0.570093	0.587965	0.478366	0.591628	0.445184	0.547228	0.408145	0.349073	0.578702	0.705577	0.544915	0.473666	0.482012	0.448818	0.568785	0.438751	0.471616
2.03291	0.0822372	0.155855	0.175582	-3.12059e-05		0.510584	0.558802	0.58636	0.489133	0.546305	0.361129	0.57419	0.2237	0.328118	0.56573	0.622978	0.604718	0.332373	0.495065	0.589042	0.449197	0.740666	0.445223
2.12972	-0.00369508	0.164492	0.112884	0.110644		0.581665	0.493695	0.637718	0.640018	0.50371	0.497915	0.627322	0.394121	0.414007	0.465682	0.579032	0.650381	0.333586	0.571666	0.679174	0.434315	0.835474	0.354214
2.22652	0.052297	0.209865	0.142212	0.0880324		0.626371	0.495702	0.715557	0.574518	0.606184	0.496647	0.69354	0.513813	0.442862	0.486109	0.612389	0.667763	0.385473	0.596705	0.669124	0.628848	0.516066	0.405549
2.32333	0.177331	0.059825	0.155323	0.149844		0.61833	0.514494	0.656012	0.400824	0.781191	0.426351	0.580766	0.532048	0.35765	0.566772	0.633114	0.654767	0.538709	0.589876	0.739088	0.771971	0.484888	0.528055
2.42014	0.189825	0.0468363	0.199268	0.0785712		0.607891	0.566859	0.630217	0.633356	0.687723	0.475297	0.540242	0.492553	0.391936	0.554648	0.647522	0.626581	0.512271	0.519311	0.84906	0.88939	0.597825	0.577953
2.51694	0.0844778	0.00786428	0.0196323	0.15087		0.596254	0.575295	0.671919	0.767911	0.665926	0.556491	0.64422	0.424191	0.48597	0.565733	0.694427	0.52723	0.395995	0.577812	0.980574	0.754122	0.535262	0.636231
2.61375	0.122937	0.094802	0.137145	-0.0109603		0.813314	0.561767	0.71656	0.706511	0.787472	0.702181	0.607752	0.426491	0.520354	0.623237	0.719454	0.499603	0.40216	0.700848	1.07195	0.653316	0.597606	0.711273
2.71055	0.146331	0.121201	0.114386	0.191495		0.925881	0.646079	0.762671	0.817209	0.816385	0.724049	0.501061	0.448481	0.562483	0.543235	0.700726	0.615427	0.456511	0.815975	1.08307	0.621431	0.909764	0.659152
2.80736	0.0445198	0.0381614	0.0748514	0.0750077		0.829465	0.702294	0.662946	1.01396	0.798982	0.684006	0.614123	0.509852	0.620105	0.394481	0.780753	0.652334	0.607234	0.820109	0.881707	0.540681	0.924473	0.543449
2.90416	0.0390803	0.07712	0.206169	0.191957		0.774679	0.702316	0.573315	0.740057	0.529062	0.584516	0.651493	0.542641	0.507455	0.592669	0.910158	0.64978	0.655687	0.602259	0.574105	0.435499	0.790458	0.501575
3.00097	0.158457	0.0996013	0.190803	0.0884153		0.740709	0.837944	0.50387	0.603594	0.378793	0.532323	0.537481	0.561138	0.309669	0.67746	0.724756	0.640815	0.653005	0.507988	0.495665	0.722841	0.721918	0.494788
3.09777	0.130396	0.0392456	0.0817563	0.158453		0.530921	1.04138	0.635733	0.742001	0.467825	0.57472	0.533264	0.548374	0.480206	0.535455	0.660661	0.617914	0.613809	0.475507	0.472929	0.876276	0.648695	0.558177
3.19458	0.141016	0.0602585	0.192529	0.196868		0.45761	0.745727	0.86825	0.665314	0.591449	0.564808	0.583944	0.523618	0.560005	0.450071	0.839181	0.567141	0.626901	0.703683	0.561605	0.761898	0.566108	0.598729
3.29138	0.0820768	0.0865834	0.183227	0.213089		0.657253	0.574136	0.786608	0.481079	0.73237	0.528739	0.610437	0.47488	0.458332	0.392998	0.813432	0.517514	0.744571	0.822949	0.710427	0.71007	0.800737	0.627864
3.38819	0.107732	0.102339	0.139174	0.162143		0.74032	0.650661	0.763016	0.579214	0.673188	0.631188	0.627762	0.409143	0.468977	0.749561	0.685549	0.468458	0.790604	0.724395	0.889323	0.689516	1.19397	0.610627
3.485	0.118465	0.0305259	0.137018	0.00053115		0.765099	0.705378	0.855523	0.624139	0.641772	0.694905	0.626754	0.334906	0.53578	0.891951	0.569282	0.506008	0.80082	0.856975	0.613969	0.575686	0.947255	0.584979
3.5818	0.143995	0.0904098	0.126484	0.330457		0.83888	0.749189	0.815494	0.562643	0.665884	0.681162	0.615267	0.454384	0.613699	0.605993	0.468492	0.50642	0.664154	1.10512	0.417492	0.490901	0.815692	0.542508
3.67861	0.0845594	0.0515033	0.213792	0.149299		0.836983	0.680535	0.709198	0.610952	0.714726	0.595028	0.59854	0.514553	0.635929	0.544876	0.398656	0.432559	0.599141	0.997448	0.378773	0.464206	0.914439	0.455388
3.77541	0.199592	0.0955611	0.116979	0.0693551		0.683732	0.642996	0.691044	0.714164	0.775932	0.472697	0.542287	0.4561	0.546785	0.596179	0.362234	0.492031	0.677433	0.859721	0.505509	0.518657	0.702304	0.345943
3.87222	0.294682	0.0977412	0.166075	0.17045		0.725477	0.667688	0.708843	0.566947	0.742937	0.605692	0.508091	0.499846	0.497238	0.615144	0.342518	0.618169	0.641861	0.661884	0.714972	0.613682	0.334728	0.441496
3.96902	0.192397	0.0752153	0.0820332	0.183034		0.864719	0.654798	0.798546	0.521138	0.724244	0.709601	0.518008	0.594693	0.467491	0.621498	0.395275	0.453757	0.549355	0.751047	0.531108	0.608366	0.450971	0.521238
4.06583	0.245773	0.109393	0.0744967	0.148885		0.894554	0.623117	0.81227	0.678143	0.734152	0.755338	0.502415	0.489229	0.428012	0.602634	0.455866	0.393264	0.662316	0.983709	0.38628	0.620661	0.540936	0.569362
4.16263	0.286707	0.135871	0.0543171	0.0555192		0.897207	0.571114	0.788004	0.767633	0.656171	0.641611	0.474066	0.441666	0.415204	0.604358	0.532123	0.540609	0.70496	0.768397	0.319522	0.668182	0.578346	0.48535
4.25944	0.1904	0.214338	0.214825	0.132052		0.8455	0.575592	0.623655	0.823365	0.534245	0.448152	0.711669	0.509906	0.455737	0.616377	0.496144	0.496693	0.60697	0.66172	0.473874	0.651528	0.552463	0.33527
4.35624	0.200336	0.0708236	0.164032	0.213767		0.897401	0.693031	0.500377	0.58098	0.598034	0.402759	0.817169	0.499957	0.478762	0.543868	0.404047	0.357146	0.563087	0.77231	0.73878	0.602787	0.494932	0.604987
4.45305	0.331987	0.156498	0.15676	0.220556		1.00111	0.713633	0.459241	0.441437	0.600014	0.406525	0.658462	0.450916	0.493033	0.519082	0.493473	0.399062	0.546258	0.833359	0.651036	0.643198	0.626089	0.719782
4.54985	0.136876	0.0849779	0.0610925	0.382675		0.983251	0.685817	0.430105	0.507578	0.478377	0.508608	0.573807	0.592162	0.489043	0.589743	0.515577	0.444187	0.682758	0.869638	0.631884	0.637918	0.683505	0.52473
4.64666	0.300972	0.442671	0.0279536	0.379468		0.999032	0.682243	0.406969	0.568614	0.453885	0.499873	0.526179	0.64716	0.491452	0.519979	0.403039	0.495731	0.74623	0.770114	0.749916	0.541255	0.593441	0.542217
4.74347	0.239452	0.36623	0.234139	0.304301		1.08209	0.67028	0.557988	0.627096	0.477965	0.43573	0.663698	0.529662	0.50666	0.380003	0.344193	0.574746	0.663644	0.716515	0.810883	0.499578	0.520716	0.665973
4.84027	0.262295	0.26685	0.177121	0.281573		1.066	0.64154	0.62242	0.611221	0.33811	0.483921	0.723747	0.476441	0.471691	0.458333	0.312194	0.667497	0.50888	0.754765	0.843317	0.485393	0.45666	0.704735
4.93708	0.338904	0.339708	0.0973612	0.275635		1.00033	0.628527	0.513681	0.584786	0.317204	0.490459	0.628854	0.455358	0.411635	0.521352	0.386078	0.421239	0.318029	0.766123	0.767618	0.517794	0.448219	0.749875
5.03388	0.398208	0.392252	0.273106	0.31616		0.821349	0.623376	0.509885	0.53723	0.534195	0.413692	0.639343	0.358663	0.414879	0.553749	0.429601	0.30301	0.382131	0.764035	0.67405	0.562432	0.496256	0.807769
5.13069	0.419415	0.337103	0.236235	0.603355		0.752646	0.661412	0.55856	0.542278	0.627331	0.375511	0.702523	0.283509	0.418321	0.455614	0.412403	0.44084	0.456416	0.778949	0.544744	0.631543	0.657249	0.740179
5.22749	0.696526	0.321716	0.494142	0.230899		0.904498	0.670806	0.576669	0.573627	0.65854	0.356622	0.568671	0.25144	0.42216	0.292213	0.406947	0.548852	0.551071	0.832791	0.487442	0.535425	0.561223	0.609849
5.3243	0.412337	0.607134	0.379068	0.521006		0.907078	0.622916	0.569473	0.592838	0.707109	0.379116	0.518226	0.313785	0.346369	0.460933	0.407362	0.641956	0.589457	0.964485	0.466142	0.356693	0.336687	0.549912
5.4211	0.531101	0.507769	0.705076	0.39879		0.835022	0.628248	0.511669	0.619835	0.758219	0.427337	0.634598	0.423338	0.230763	0.589594	0.356301	0.52626	0.599709	0.91132	0.414066	0.366424	0.571758	0.489726
5.51791	0.608202	0.416113	0.920684	0.24484		0.859087	0.66019	0.536138	0.662404	0.814413	0.527012	0.665011	0.4771	0.415876	0.638137	0.349911	0.492763	0.650117	0.765725	0.406436	0.367014	0.668973	0.429042
5.61471	0.347851	0.603516	0.755649	0.884118		0.839184	0.804698	0.601744	0.595996	0.705774	0.642573	0.652444	0.525943	0.528625	0.523352	0.432859	0.623663	0.639884	0.790051	0.487696	0.349324	0.490478	0.423998
5.71152	0.557954	0.533719	0.603497	0.729383		0.731343	0.822301	0.807973	0.475101	0.514719	0.766075	0.765412	0.564948	0.496649	0.326902	0.423329	0.623911	0.508369	0.799513	0.496336	0.36607	0.502147	0.446774
5.80833	0.509603	0.570277	0.71312	0.370168		0.635498	0.586091	0.91122	0.508216	0.581959	0.565745	0.794198	0.543491	0.4716	0.375723	0.36756	0.558832	0.453191	0.779248	0.468666	0.400034	0.608897	0.241564
5.90513	0.730167	0.609732	0.69351	0.922076		0.545651	0.55762	0.808502	0.573422	0.597276	0.428641	0.654619	0.491801	0.450013	0.441936	0.564492	0.480958	0.436183	0.717923	0.519085	0.326263	0.628218	0.158458
6.00194	0.559198	0.390397	0.88314	0.711906		0.663409	0.633019	0.678883	0.702812	0.508744	0.417989	0.593342	0.408769	0.348156	0.542931	0.635216	0.45126	0.488045	0.636069	0.515017	0.306821	0.631697	0.319561
6.09874	0.624669	0.335415	0.852898	0.945313		0.711777	0.686451	0.535813	0.707618	0.444048	0.502812	0.571216	0.381428	0.270366	0.541998	0.453524	0.517914	0.499449	0.728308	0.401974	0.396038	0.603494	0.314436
6.19555	1.04132	0.359584	0.44147	0.796849		0.621367	0.702097	0.682488	0.650132	0.391271	0.635373	0.581315	0.465466	0.240709	0.4901	0.564508	0.446106	0.429937	0.765185	0.390249	0.430784	0.565953	0.226196
6.29235	0.916672	0.614442	0.534898	0.888385		0.581192	0.642172	0.736947	0.595266	0.391642	0.510992	0.545948	0.529602	0.345761	0.368675	0.82183	0.305068	0.388795	0.691339	0.429184	0.438296	0.523743	0.300081
6.38916	0.836744	0.276852	0.618671	0.429364		0.566136	0.577902	0.606974	0.520222	0.405083	0.451146	0.419651	0.583787	0.518167	0.280556	0.67712	0.396675	0.361837	0.567909	0.409242	0.317194	0.458005	0.294029
6.48596	0.899787	0.397416	0.767023	0.331467		0.481648	0.51146	0.660068	0.404821	0.444667	0.52037	0.460692	0.675337	0.46629	0.259051	0.530943	0.481431	0.372352	0.419688	0.386214	0.224533	0.419752	0.128106
6.58277	0.736145	0.584174	0.648991	0.402649		0.452257	0.470742	0.804697	0.430917	0.398832	0.418737	0.585403	0.638799	0.39784	0.307499	0.381832	0.552486	0.397054	0.53304	0.357014	0.188753	0.436471	0.131956
6.67957	1.01714	0.74398	0.458919	0.918423		0.533064	0.436231	0.709516	0.52776	0.310288	0.231677	0.516036	0.346089	0.296246	0.390922	0.370308	0.542498	0.45013	0.615317	0.382375	0.264931	0.475916	0.220693
6.77638	1.13754	0.545996	0.700118	0.650851		0.652799	0.414133	0.653392	0.621706	0.195453	0.315213	0.450549	0.315472	0.261571	0.429457	0.427578	0.491988	0.398884	0.635444	0.435017	0.397089	0.526724	0.250006
6.87318	0.800424	0.487534	0.76398	0.75252		0.791997	0.384186	0.675379	0.683696	0.131556	0.347581	0.392822	0.415902	0.260357	0.426758	0.39694	0.6905	0.295476	0.592507	0.317348	0.333543	0.521175	0.256095
6.96999	1.12079	0.558125	0.763366	0.967242		0.746616	0.350315	0.638174	0.681775	0.169532	0.277612	0.341666	0.46369	0.220776	0.341593	0.442153	0.74551	0.217953	0.518038	0.240128	0.292026	0.50351	0.215735
7.0668	0.833662	0.294681	0.848789	0.644297		0.687383	0.42748	0.571372	0.598505	0.272179	0.309677	0.293795	0.447378	0.211749	0.346698	0.639066	0.513515	0.176906	0.530886	0.243807	0.294568	0.461612	0.244949
7.1636	1.04195	0.65229	0.82113	1.02162		0.600448	0.466557	0.463895	0.474561	0.407161	0.392758	0.276783	0.302864	0.263832	0.396936	0.619369	0.404801	0.208812	0.526687	0.314073	0.300884	0.312793	0.30895
7.26041	0.985954	0.739454	0.864529	0.853155		0.64786	0.429456	0.420721	0.363435	0.35767	0.371956	0.3002	0.269866	0.242599	0.240453	0.491366	0.357728	0.221281	0.488392	0.417632	0.309086	0.110513	0.23216
7.35721	0.723302	0.801044	1.0468	0.962796		0.762446	0.477515	0.506154	0.328308	0.345053	0.347733	0.404477	0.292625	0.184708	0.173366	0.554006	0.415257	0.224032	0.423381	0.280412	0.217511	0.177882	0.220355
7.45402	1.08944	0.716179	1.13851	0.44252		0.815035	0.568155	0.550983	0.445175	0.406183	0.316665	0.302957	0.450543	0.167985	0.285071	0.57744	0.455931	0.210561	0.345011	0.196471	0.178611	0.256008	0.33852
7.55082	1.05937	1.13409	1.01688	0.906004		0.796404	0.570995	0.57551	0.4418	0.332811	0.260871	0.0985398	0.510345	0.209084	0.28525	0.522463	0.462895	0.185897	0.583755	0.21909	0.245059	0.355648	0.318162
7.64763	0.997212	0.732746	1.08284	0.691617		0.635332	0.534826	0.413474	0.378305	0.192189	0.192714	0.148081	0.373915	0.36583	0.229667	0.505861	0.399521	0.138847	0.647974	0.167758	0.225868	0.266297	0.228543
7.74443	0.741521	1.1559	1.01822	0.406823		0.5355	0.420638	0.336603	0.366961	0.230424	0.218537	0.245191	0.279471	0.339572	0.168795	0.508446	0.300978	0.183578	0.363139	0.0794503	0.163857	0.0824522	0.187044
7.84124	0.828528	1.0835	0.723977	0.395157		0.466287	0.46093	0.430064	0.375439	0.263604	0.263571	0.437439	0.20602	0.221813	0.183122	0.539975	0.379188	0.2742	0.333358	0.214436	0.230801	0.164308	0.159966
7.93804	0.784363	0.828429	1.11606	0.52083		0.512225	0.578462	0.442328	0.423563	0.286674	0.347028	0.443824	0.244417	0.276463	0.347844	0.526696	0.408804	0.237242	0.431104	0.314499	0.237097	0.256147	0.16173
8.03485	0.598957	0.952134	1.18413	0.810096		0.530029	0.446987	0.413994	0.368993	0.242195	0.296349	0.357277	0.284873	0.270145	0.362809	0.423801	0.341232	0.221486	0.387535	0.344718	0.122097	0.367951	0.188725
8.13166	0.477181	0.634123	1.00038	0.690405		0.491564	0.36313	0.355052	0.263076	0.163942	0.1786	0.305731	0.329445	0.141893	0.302895	0.471159	0.305295	0.24813	0.364875	0.292705	0.175495	0.339482	0.228337

## Sheet: 1Gii
Figure 1 Gii
	VTA motion intiation mean F										LC motion initiation mean F
time from motion onset	1	2	3	4	5	6	7	8	9		1	2	3	4	5	6	7	8	9	10	11	12	13	14	15	16	17	18	19	20	21	22	23	24	25	26	27	28	29	30	31	32	33	34	35	36	37	38	39
-1.93611	0.545146	0.287598	1.01131	0.292575	0.391236	0.61842	0.362052	0.602845	0.458433		0.340125	0.139765	0.276896	NaN	NaN	NaN	NaN	NaN	NaN	NaN	NaN	0.21805	0.597697	0.477463	0.368894	NaN	NaN	0.270799	0.307717	0.437766	0.341464	0.310431	0.499559	0.216425	0.27666	0.285475	0.472465	0.434247	0.448491	0.458583	0.613946	0.618899	0.313416	0.256637	0.278408	0.508742	0.306086	0.375085	0.427628
-1.8393	0.530021	0.295615	0.69047	0.239038	0.386734	0.748445	0.350921	0.491056	0.605323		0.275508	0.132376	0.309106	NaN	NaN	NaN	NaN	NaN	NaN	NaN	NaN	0.234644	0.22815	0.371609	0.340407	NaN	NaN	0.171706	0.322705	0.459614	0.454395	0.272631	0.435148	0.240078	0.290516	0.302977	0.511256	0.442296	0.622105	0.399408	0.436773	0.519547	0.298747	0.272118	0.205821	0.467704	0.242803	0.280562	0.453844
-1.7425	0.487597	0.264217	0.638441	0.231318	0.359739	0.705221	0.350891	0.47618	0.473687		0.303984	0.126672	0.323617	NaN	NaN	NaN	NaN	NaN	NaN	NaN	NaN	0.223033	0.117163	0.610301	0.313653	NaN	NaN	0.191481	0.273089	0.400444	0.33383	0.304877	0.439646	0.254652	0.327894	0.329774	0.50593	0.444846	0.493887	0.492734	0.513654	0.426285	0.406752	0.22632	0.226624	0.673348	0.38611	0.41349	0.42921
-1.64569	0.485073	0.276864	0.679878	0.260799	0.374981	0.654286	0.363846	0.594312	0.546637		0.317563	0.147396	0.321831	NaN	NaN	NaN	NaN	NaN	NaN	NaN	NaN	0.247774	0.463746	0.37275	0.42525	NaN	NaN	0.204976	0.255016	0.367951	0.257985	0.346477	0.452394	0.31887	0.348983	0.325919	0.523454	0.39179	0.502368	0.412585	0.631052	0.486368	0.258296	0.183388	0.179039	0.627296	0.263474	0.296713	0.284599
-1.54889	0.441803	0.2875	0.70634	0.233351	0.379652	0.515711	0.359744	0.474408	0.409556		0.301795	0.143256	0.301405	NaN	NaN	NaN	NaN	NaN	NaN	NaN	NaN	0.28127	0.137687	0.010065	0.288404	NaN	NaN	0.20648	0.265426	0.507103	0.310153	0.339782	0.428846	0.331328	0.385576	0.346458	0.587875	0.522774	0.569606	0.58138	0.285016	0.50054	0.25445	0.493505	0.335286	0.597898	0.214043	0.39283	0.317103
-1.45208	0.41389	0.274547	0.587699	0.225703	0.325715	0.411658	0.341262	0.419219	0.394567		0.299155	0.14265	0.303113	NaN	NaN	NaN	NaN	NaN	NaN	NaN	NaN	0.242797	0.224481	0.291314	0.325875	NaN	NaN	0.271581	0.35358	0.442901	0.411771	0.377427	0.412967	0.2624	0.423482	0.391453	0.518544	0.3906	0.359829	0.53511	0.528675	0.354117	0.349377	0.429656	0.308453	0.696014	0.310916	0.335629	0.342094
-1.35528	0.450529	0.296222	0.612791	0.266298	0.365621	0.50452	0.347689	0.421163	0.508819		0.305228	0.168153	0.305457	NaN	NaN	NaN	NaN	NaN	NaN	NaN	NaN	0.292827	0.253725	0.494192	0.342043	NaN	NaN	0.349237	0.433604	0.326498	0.545923	0.335879	0.413044	0.195579	0.413295	0.386261	0.511361	0.406073	0.265928	0.347808	0.404145	0.295286	0.259662	0.425496	0.295483	0.674925	0.332887	0.440294	0.537429
-1.25847	0.442309	0.30449	0.657066	0.239219	0.339222	0.554666	0.372962	0.575356	0.409225		0.313194	0.151258	0.286751	NaN	NaN	NaN	NaN	NaN	NaN	NaN	NaN	0.366062	0.611207	0.362084	0.256612	NaN	NaN	0.324159	0.410731	0.300997	0.468569	0.291246	0.381032	0.174004	0.415792	0.367153	0.475374	0.330648	0.624469	0.344833	0.264054	0.276773	0.194396	0.297723	0.130169	0.583476	0.298454	0.361346	0.440329
-1.16167	0.385593	0.281042	0.595978	0.26217	0.359489	0.554277	0.36718	0.619158	0.521868		0.311946	0.141182	0.315469	NaN	NaN	NaN	NaN	NaN	NaN	NaN	NaN	0.243417	0.375893	0.46093	0.236472	NaN	NaN	0.256857	0.36435	0.243213	0.346079	0.306332	0.309747	0.194692	0.387784	0.34773	0.387969	0.4616	0.436886	0.403005	0.329966	0.594241	0.230026	0.503848	0.221833	0.571234	0.490661	0.326921	0.362706
-1.06486	0.384586	0.257971	0.581637	0.229452	0.345896	0.582415	0.310741	0.28464	0.387818		0.30933	0.147438	0.300243	NaN	NaN	NaN	NaN	NaN	NaN	NaN	NaN	0.220149	0.605884	0.128905	0.262821	NaN	NaN	0.288974	0.348109	0.299779	0.373703	0.35108	0.36123	0.23108	0.288878	0.272653	0.423402	0.295388	0.455142	0.314085	0.37191	0.527313	0.171884	0.242796	0.261983	0.499397	0.236832	0.273316	0.193178
-0.968054	0.370843	0.268073	0.583322	0.244414	0.290706	0.493302	0.256429	0.359789	0.374401		0.278699	0.158294	0.280313	NaN	NaN	NaN	NaN	NaN	NaN	NaN	NaN	0.268651	0.462662	-0.0318482	0.211148	NaN	NaN	0.269769	0.301961	0.362856	0.448942	0.400665	0.479143	0.22541	0.345266	0.320057	0.418557	0.42714	0.481719	0.54852	0.781724	0.432379	0.251299	0.388207	0.242091	0.68904	0.464781	0.35013	0.294856
-0.871249	0.348488	0.272878	0.487708	0.228276	0.297566	0.608103	0.250292	0.433003	0.462319		0.268978	0.146453	0.275689	NaN	NaN	NaN	NaN	NaN	NaN	NaN	NaN	0.25439	0.243707	0.153712	0.204568	NaN	NaN	0.123154	0.258818	0.416188	0.503574	0.390257	0.484754	0.201403	0.358144	0.33558	0.451264	0.35818	0.544848	0.225126	0.413879	0.525586	0.23444	0.396186	0.334952	0.382113	0.290028	0.432939	0.34845
-0.774443	0.36464	0.269206	0.584323	0.205376	0.324565	0.548351	0.308345	0.407305	0.315653		0.293432	0.126663	0.267408	NaN	NaN	NaN	NaN	NaN	NaN	NaN	NaN	0.40618	0.382059	0.548269	0.233162	NaN	NaN	0.11974	0.270818	0.354008	0.547508	0.328396	0.404852	0.231633	0.360611	0.346646	0.342529	0.271451	0.45022	0.265639	0.606698	0.423529	0.292226	0.476617	0.286628	0.521276	0.398404	0.44219	0.359131
-0.677638	0.349425	0.249243	0.396351	0.238003	0.346598	0.494541	0.380264	0.348275	0.378404		0.313717	0.132212	0.332699	NaN	NaN	NaN	NaN	NaN	NaN	NaN	NaN	0.253065	0.402576	0.0696551	0.242196	NaN	NaN	0.180808	0.284364	0.232362	0.542957	0.31026	0.371997	0.227756	0.395202	0.355162	0.405224	0.60131	0.393322	0.738652	0.354207	0.33838	0.313073	0.456089	0.226774	0.612296	0.182851	0.341674	0.417427
-0.580833	0.379282	0.258632	0.41142	0.233066	0.329366	0.496499	0.351164	0.469733	0.201252		0.331047	0.149609	0.361925	NaN	NaN	NaN	NaN	NaN	NaN	NaN	NaN	0.23883	0.331323	0.611246	0.162233	NaN	NaN	0.213581	0.270731	0.270421	0.469238	0.296227	0.356341	0.20476	0.344143	0.296043	0.354309	0.470485	0.467746	0.73567	0.451802	0.414064	0.331566	0.43078	0.322528	0.580501	0.496464	0.385058	0.358791
-0.484027	0.334378	0.295559	0.572494	0.204431	0.287249	0.556301	0.354971	0.325328	0.338605		0.333204	0.168565	0.326045	NaN	NaN	NaN	NaN	NaN	NaN	NaN	NaN	0.258989	0.50532	0.330266	0.125483	NaN	NaN	0.21396	0.219006	0.366803	0.480282	0.271896	0.345762	0.233745	0.377263	0.341252	0.397074	0.501424	0.573365	0.64857	0.611056	0.748246	0.224179	0.348893	0.241045	0.483492	0.489484	0.413923	0.35206
-0.387222	0.311507	0.287106	0.459095	0.23419	0.307038	0.682258	0.395129	0.331413	0.362287		0.324434	0.195799	0.274363	NaN	NaN	NaN	NaN	NaN	NaN	NaN	NaN	0.289284	0.552868	0.430948	0.139594	NaN	NaN	0.220103	0.223057	0.385529	0.506947	0.331005	0.35138	0.272635	0.371518	0.342682	0.453004	0.50509	0.568432	0.551962	0.337628	0.602982	0.372948	0.29803	0.174949	0.586876	0.414008	0.315231	0.498054
-0.290416	0.309055	0.2869	0.365488	0.201914	0.3088	0.583111	0.373381	0.304079	0.329393		0.324535	0.199518	0.27607	NaN	NaN	NaN	NaN	NaN	NaN	NaN	NaN	0.270155	0.573112	0.144863	0.126393	NaN	NaN	0.250511	0.356175	0.466361	0.531983	0.404332	0.432176	0.297008	0.382033	0.37384	0.386385	0.456417	0.56333	0.562498	0.463849	0.67294	0.328526	0.301605	0.348389	0.585764	0.517451	0.369291	0.461454
-0.193611	0.271787	0.272584	0.373426	0.230307	0.298143	0.548362	0.326214	0.361788	0.29399		0.333168	0.226491	0.339617	NaN	NaN	NaN	NaN	NaN	NaN	NaN	NaN	0.258918	0.488294	0.320097	0.14001	NaN	NaN	0.289604	0.449124	0.46094	0.483196	0.36683	0.504624	0.374926	0.397802	0.394946	0.378854	0.597756	0.657419	0.646784	0.514567	0.449491	0.457695	0.363732	0.338602	0.675893	0.366499	0.433232	0.501051
-0.0968054	0.283172	0.302517	0.321766	0.195313	0.302293	0.525093	0.336538	0.215258	0.46863		0.325405	0.296516	0.388976	NaN	NaN	NaN	NaN	NaN	NaN	NaN	NaN	0.279164	0.381306	0.278047	0.190602	NaN	NaN	0.316642	0.447126	0.341588	0.428015	0.354512	0.515033	0.432656	0.369601	0.364124	0.447274	0.550949	0.539231	0.725241	0.614079	0.517633	0.501638	0.343171	0.386351	0.461391	0.492402	0.386021	0.436492
-2.22045e-16	0.290951	0.29377	0.428988	0.194052	0.301555	0.566549	0.344789	0.258886	0.280429		0.357304	0.325443	0.382677	NaN	NaN	NaN	NaN	NaN	NaN	NaN	NaN	0.314743	0.487394	0.315922	0.16335	NaN	NaN	0.267424	0.455129	0.301698	0.410177	0.419683	0.42585	0.451334	0.405114	0.391649	0.496918	0.601832	0.673431	0.693955	0.855019	0.543106	0.434407	0.49086	0.361361	0.415249	0.438412	0.36849	0.577328
0.0968054	0.259887	0.248922	0.269255	0.208537	0.254933	0.533487	0.304331	0.308062	0.316149		0.376102	0.349585	0.369843	NaN	NaN	NaN	NaN	NaN	NaN	NaN	NaN	0.430308	0.456473	0.483976	0.123748	NaN	NaN	0.305901	0.568479	0.293027	0.492562	0.482391	0.377779	0.493406	0.461796	0.44529	0.513215	0.7061	0.912413	0.647701	0.789257	0.841535	0.458375	0.412461	0.421502	0.771397	0.437198	0.581706	0.479337
0.193611	0.239865	0.283611	0.286885	0.192635	0.268711	0.448378	0.318589	0.329783	0.39881		0.351746	0.365837	0.374898	NaN	NaN	NaN	NaN	NaN	NaN	NaN	NaN	0.366127	1.08187	0.192698	0.16546	NaN	NaN	0.359885	0.483795	0.33102	0.477753	0.516015	0.425314	0.513397	0.469326	0.464835	0.574147	0.647445	0.807574	0.786119	0.685475	0.712602	0.380146	0.516848	0.431528	0.451368	0.545868	0.538567	0.534084
0.290416	0.277709	0.274318	0.237881	0.228865	0.29551	0.423592	0.377741	0.283576	0.495963		0.36718	0.389987	0.380128	NaN	NaN	NaN	NaN	NaN	NaN	NaN	NaN	0.419266	0.735965	0.206689	0.13866	NaN	NaN	0.359542	0.427289	0.380093	0.414777	0.513625	0.41751	0.485101	0.495386	0.499675	0.519611	0.659274	0.652275	0.742888	0.575162	0.631434	0.484874	0.386421	0.363949	0.759616	0.554859	0.377197	0.610315
0.387222	0.314457	0.310267	0.252149	0.199674	0.266761	0.422247	0.367847	0.126101	0.385277		0.395119	0.435531	0.420978	NaN	NaN	NaN	NaN	NaN	NaN	NaN	NaN	0.34704	0.905502	0.281397	0.155806	NaN	NaN	0.417479	0.44383	0.389698	0.472048	0.531731	0.297139	0.486321	0.560382	0.544927	0.533365	0.67126	0.452103	0.743867	0.677874	1.02396	0.604626	0.460179	0.546252	0.590276	0.845707	0.345296	0.687378
0.484027	0.29129	0.274121	0.286008	0.182058	0.314529	0.384768	0.292037	0.439696	0.37783		0.428619	0.476707	0.433037	NaN	NaN	NaN	NaN	NaN	NaN	NaN	NaN	0.261166	0.48357	0.325835	0.22204	NaN	NaN	0.4731	0.42368	0.347591	0.480867	0.543882	0.280515	0.495321	0.596972	0.575656	0.552901	0.640356	0.528121	0.600014	0.853979	0.73476	0.616692	0.470894	0.624283	0.40248	0.738689	0.335759	0.581145
0.580833	0.312269	0.356545	0.230432	0.193907	0.271348	0.416715	0.299511	0.215521	0.435984		0.454114	0.493618	0.405707	NaN	NaN	NaN	NaN	NaN	NaN	NaN	NaN	0.382173	0.677052	0.346145	0.228231	NaN	NaN	0.427606	0.429883	0.373726	0.446801	0.517536	0.312386	0.449121	0.492069	0.497031	0.510289	0.57184	0.767121	0.534759	0.500683	0.648328	0.565993	0.391807	0.599886	0.5442	0.758909	0.452831	0.610902
0.677638	0.317852	0.402287	0.301824	0.240389	0.31393	0.428424	0.325094	0.315245	0.38334		0.437749	0.528893	0.403015	NaN	NaN	NaN	NaN	NaN	NaN	NaN	NaN	0.392357	0.810068	0.379019	0.200705	NaN	NaN	0.390454	0.402617	0.461073	0.49415	0.496942	0.280387	0.424659	0.454225	0.449971	0.483815	0.576114	0.634886	1.02125	0.737403	0.854963	0.532052	0.45365	0.553078	0.384598	0.804479	0.488236	0.437281
0.774443	0.348699	0.435704	0.270682	0.207586	0.297024	0.318313	0.289765	0.227119	0.427392		0.428525	0.582309	0.437939	NaN	NaN	NaN	NaN	NaN	NaN	NaN	NaN	0.350411	0.558708	0.352106	0.186534	NaN	NaN	0.400022	0.358068	0.563674	0.520963	0.496031	0.254943	0.399188	0.414475	0.386286	0.572521	0.601114	0.516415	0.543196	0.663926	0.465586	0.633168	0.418516	0.5457	0.592499	0.856436	0.547623	0.670891
0.871249	0.385777	0.460586	0.276216	0.196258	0.334026	0.301382	0.320073	0.354044	0.481696		0.414144	0.582179	0.473995	NaN	NaN	NaN	NaN	NaN	NaN	NaN	NaN	0.479446	1.05708	0.624497	0.227382	NaN	NaN	0.364922	0.33662	0.628435	0.453008	0.524209	0.286111	0.415681	0.378443	0.346171	0.520823	0.635814	0.528478	0.603637	0.865595	0.806802	0.660502	0.50959	0.660625	0.375926	0.541138	0.617257	0.658805
0.968054	0.366936	0.382179	0.190504	0.220362	0.320653	0.285177	0.368047	0.289812	0.41092		0.419894	0.573154	0.501321	NaN	NaN	NaN	NaN	NaN	NaN	NaN	NaN	0.423867	0.523016	0.278634	0.135481	NaN	NaN	0.405845	0.290232	0.601071	0.36556	0.521152	0.312107	0.470206	0.475854	0.413235	0.58427	0.550862	0.704702	0.77486	0.87197	0.339485	0.666289	0.442144	0.534822	0.54883	0.867589	0.488779	0.538742
1.06486	0.347813	0.421022	0.282337	0.182406	0.321458	0.432726	0.369391	0.337496	0.393595		0.404775	0.579517	0.487258	NaN	NaN	NaN	NaN	NaN	NaN	NaN	NaN	0.400134	0.521424	0.278097	0.0245097	NaN	NaN	0.452276	0.291427	0.500908	0.356929	0.479953	0.346014	0.521674	0.590292	0.536912	0.59369	0.530137	0.754916	0.965853	0.895613	0.614095	0.722473	0.297366	0.559674	0.493428	0.634808	0.493575	0.736135
1.16167	0.390964	0.400382	0.260899	0.209506	0.294684	0.455573	0.372382	0.269093	0.357787		0.407329	0.590633	0.482596	NaN	NaN	NaN	NaN	NaN	NaN	NaN	NaN	0.387311	0.692911	0.374629	0.191745	NaN	NaN	0.365786	0.349316	0.520376	0.377228	0.43849	0.413433	0.530615	0.638552	0.611802	0.638783	0.677591	0.533296	1.06019	0.817961	0.745783	0.74906	0.45911	0.805735	0.433185	0.51188	0.410017	0.703749
1.25847	0.337719	0.41605	0.15791	0.239744	0.323062	0.350571	0.372116	0.312847	0.340414		0.426757	0.590285	0.495514	NaN	NaN	NaN	NaN	NaN	NaN	NaN	NaN	0.284227	0.319557	0.397677	0.270127	NaN	NaN	0.288332	0.378815	0.583107	0.385123	0.478222	0.480247	0.47891	0.616202	0.594195	0.575677	0.582326	0.6813	1.11794	0.761753	0.525802	0.65186	0.273658	0.680051	0.446334	0.534178	0.389596	0.454245
1.35528	0.337882	0.389848	0.177754	0.236137	0.339735	0.346732	0.381006	0.261098	0.379469		0.442963	0.599184	0.525744	NaN	NaN	NaN	NaN	NaN	NaN	NaN	NaN	0.362525	0.717149	0.310554	0.44357	NaN	NaN	0.32555	0.386772	0.487784	0.401069	0.530718	0.432533	0.438731	0.585694	0.573691	0.561535	0.831341	1.03465	1.04454	1.14578	0.695608	0.629971	0.309771	0.496066	0.313533	0.462572	0.455871	0.631668
1.45208	0.379269	0.395633	0.150039	0.238574	0.335681	0.590294	0.388664	0.151704	0.354361		0.399168	0.597556	0.569937	NaN	NaN	NaN	NaN	NaN	NaN	NaN	NaN	0.302212	0.840461	0.412833	0.288651	NaN	NaN	0.369456	0.322226	0.481009	0.382471	0.57718	0.420226	0.477751	0.489058	0.485026	0.597744	0.760315	0.640332	0.896491	1.07894	0.677893	0.62187	0.423928	0.700627	0.26812	0.640924	0.485203	0.46798
1.54889	0.370543	0.436023	0.120247	0.212469	0.340425	0.568007	0.399488	0.211618	0.277475		0.355695	0.57263	0.490745	NaN	NaN	NaN	NaN	NaN	NaN	NaN	NaN	0.278269	0.473019	0.175033	0.338606	NaN	NaN	0.368434	0.323988	0.450016	0.419817	0.625952	0.442902	0.482083	0.483892	0.448269	0.643775	0.507328	1.04136	0.835918	1.04505	0.583942	0.586613	0.354134	0.727155	0.162531	0.532345	0.46656	0.724074
1.64569	0.397278	0.418226	0.124329	0.237782	0.360038	0.58879	0.393176	0.345255	0.374373		0.348275	0.549396	0.384101	NaN	NaN	NaN	NaN	NaN	NaN	NaN	NaN	0.287505	0.470184	0.574169	0.539462	NaN	NaN	0.354081	0.270854	0.400708	0.451199	0.606338	0.472006	0.512131	0.564463	0.521831	0.567471	0.562153	0.777293	0.839797	0.672934	0.3858	0.478977	0.50771	0.793658	0.320819	0.716664	0.380076	0.480111
1.7425	0.379784	0.416267	0.108227	0.238679	0.35117	0.591047	0.377887	0.272196	0.242894		0.34131	0.553387	0.405173	NaN	NaN	NaN	NaN	NaN	NaN	NaN	NaN	0.266025	-0.00589977	0.240231	0.683762	NaN	NaN	0.320904	0.230263	0.391819	0.44398	0.52774	0.480105	0.526892	0.564999	0.531271	0.65035	0.587233	0.492489	0.878993	0.681907	0.700827	0.598021	0.466414	0.606779	0.330021	0.566297	0.496578	0.50209
1.8393	0.367702	0.465587	0.181015	0.239563	0.345311	0.621845	0.356424	0.257617	0.275502		0.344852	0.544606	0.434967	NaN	NaN	NaN	NaN	NaN	NaN	NaN	NaN	0.348082	0.449295	0.342405	0.709854	NaN	NaN	0.23991	0.317427	0.379524	0.501413	0.60774	0.528509	0.521562	0.420493	0.411261	0.669563	0.785688	0.756052	0.952544	0.852329	0.659393	0.629248	0.33431	0.458615	0.35504	0.532563	0.438815	0.672426
1.93611	0.354826	0.426991	0.137564	0.243943	0.326552	0.640701	0.306363	0.255523	0.238706		0.341423	0.514282	0.424328	NaN	NaN	NaN	NaN	NaN	NaN	NaN	NaN	0.309616	0.363304	0.0213729	0.709101	NaN	NaN	0.296778	0.340239	0.373933	0.44864	0.64555	0.550341	0.481282	0.308198	0.316176	0.632187	0.783025	0.824955	0.818583	0.852176	0.468353	0.606911	0.388519	0.640268	0.23837	0.661828	0.461423	0.538573
2.03291	0.417335	0.447234	0.103411	0.239341	0.368611	0.769384	0.294646	0.362342	0.39879		0.363614	0.501295	0.435654	NaN	NaN	NaN	NaN	NaN	NaN	NaN	NaN	0.372309	0.455719	0.187674	0.768022	NaN	NaN	0.347097	0.377863	0.381504	0.397279	0.62682	0.452784	0.430909	0.361214	0.352821	0.76991	0.71964	0.926199	0.944056	0.852999	0.61482	0.5817	0.444133	0.6815	0.289024	0.598221	0.541651	0.467112
2.12972	0.403671	0.42508	0.096081	0.256411	0.356159	0.655925	0.323982	0.289903	0.33752		0.365037	0.538539	0.444885	NaN	NaN	NaN	NaN	NaN	NaN	NaN	NaN	0.314011	0.282471	0.625229	0.798998	NaN	NaN	0.281659	0.354146	0.509376	0.42717	0.632742	0.484325	0.418847	0.405855	0.400388	0.612903	0.712439	0.573194	0.895324	0.913811	0.655692	0.58703	0.528376	0.553806	0.396445	0.589022	0.454992	0.421798
2.22652	0.450688	0.447838	0.123102	0.24394	0.357233	0.613478	0.323815	0.208158	0.258462		0.385689	0.562957	0.426795	NaN	NaN	NaN	NaN	NaN	NaN	NaN	NaN	0.315122	0.385017	0.204956	0.82271	NaN	NaN	0.290756	0.322594	0.564975	0.552755	0.594129	0.551429	0.445171	0.468145	0.463045	0.649801	0.582617	0.64942	0.848059	1.06026	0.532637	0.68508	0.344548	0.527293	0.534186	0.569944	0.287764	0.484052
2.32333	0.429555	0.479579	0.135581	0.246354	0.369058	0.884856	0.304442	0.20705	0.209467		0.377658	0.576384	0.421924	NaN	NaN	NaN	NaN	NaN	NaN	NaN	NaN	0.440288	0.263805	0.749093	0.800957	NaN	NaN	0.321457	0.277373	0.549009	0.615252	0.548685	0.507686	0.517628	0.522304	0.505795	0.700264	0.446726	0.689684	0.534279	0.712312	0.63	0.581131	0.463046	0.381542	0.440945	0.572335	0.371996	0.498705
2.42014	0.433649	0.482716	0.128625	0.244111	0.362199	0.675781	0.30607	0.265556	0.285538		0.323392	0.600035	0.405405	NaN	NaN	NaN	NaN	NaN	NaN	NaN	NaN	0.380034	0.21801	0.706245	0.834273	NaN	NaN	0.283383	0.280067	0.53397	0.507959	0.548588	0.491273	0.577406	0.55047	0.514523	0.797815	0.425396	0.513024	0.874611	0.734289	0.793781	0.479659	0.494554	0.41874	0.355814	0.38903	0.396833	0.51305
2.51694	0.414472	0.482357	0.065711	0.217511	0.373506	0.714621	0.300474	0.319969	0.494982		0.321192	0.614198	0.442321	NaN	NaN	NaN	NaN	NaN	NaN	NaN	NaN	0.362195	0.663586	0.503865	0.659736	NaN	NaN	0.282029	0.32158	0.430461	0.394535	0.518386	0.425128	0.622316	0.553072	0.499364	0.687696	0.602527	0.868847	0.701978	1.00376	0.705417	0.525433	0.411188	0.472881	0.44239	0.507927	0.508344	0.424653
2.61375	0.45363	0.470283	0.0859811	0.24941	0.391622	0.768168	0.303917	0.271837	0.292365		0.388758	0.65677	0.457497	NaN	NaN	NaN	NaN	NaN	NaN	NaN	NaN	0.328148	0.0812355	0.289256	0.673569	NaN	NaN	0.258904	0.277424	0.396481	0.409552	0.508976	0.472093	0.63742	0.484607	0.443612	0.723244	0.406656	0.740133	0.7385	1.1512	0.842405	0.495074	0.367286	0.521859	0.3881	0.514906	0.392284	0.512633
2.71055	0.374912	0.476274	0.143353	0.24907	0.412438	0.727442	0.314675	0.373139	0.394167		0.421059	0.700533	0.462837	NaN	NaN	NaN	NaN	NaN	NaN	NaN	NaN	0.384021	0.38968	0.452664	0.545426	NaN	NaN	0.254642	0.218386	0.35878	0.440697	0.506974	0.575605	0.531403	0.411823	0.395584	0.738599	0.576263	0.730793	0.734801	0.560207	0.632277	0.503129	0.303138	0.493985	0.281687	0.44759	0.300906	0.348222
2.80736	0.407198	0.524885	0.0581351	0.245014	0.395904	0.666146	0.345308	0.261844	0.384223		0.425046	0.698942	0.470299	NaN	NaN	NaN	NaN	NaN	NaN	NaN	NaN	0.263288	0.420112	0.151682	0.586887	NaN	NaN	0.325674	0.184591	0.456116	0.445125	0.581783	0.57093	0.481738	0.378045	0.385259	0.69372	0.581351	0.632338	0.769194	0.842925	0.832992	0.500476	0.528376	0.713205	0.418374	0.506615	0.426807	0.559219
2.90416	0.402107	0.487681	0.128582	0.272806	0.375524	0.662837	0.307373	0.272088	0.346292		0.426063	0.628763	0.527875	NaN	NaN	NaN	NaN	NaN	NaN	NaN	NaN	0.325458	0.885046	0.329676	0.685164	NaN	NaN	0.33346	0.211988	0.529093	0.50739	0.621697	0.505326	0.475423	0.372821	0.381447	0.691292	0.437104	0.707987	0.746823	0.688316	0.705309	0.56689	0.445747	0.565377	0.477276	0.525	0.382519	0.463881
3.00097	0.412593	0.579904	0.134319	0.255807	0.355697	0.81763	0.270673	0.125165	0.321135		0.39009	0.591375	0.53326	NaN	NaN	NaN	NaN	NaN	NaN	NaN	NaN	0.315472	0.237862	0.191654	0.552501	NaN	NaN	0.25306	0.234154	0.447973	0.48031	0.510665	0.457061	0.39603	0.321011	0.323087	0.740102	0.538296	0.774233	0.657943	0.606136	0.651782	0.436276	0.40448	0.701225	0.56554	0.462783	0.435801	0.447439
3.09777	0.406535	0.556284	0.102463	0.273682	0.37549	0.568265	0.31117	0.229478	0.384913		0.397995	0.61188	0.467042	NaN	NaN	NaN	NaN	NaN	NaN	NaN	NaN	0.384585	0.641331	-0.0333277	0.470077	NaN	NaN	0.304061	0.258791	0.464592	0.491838	0.467166	0.501512	0.393865	0.264166	0.266361	0.769397	0.502196	0.761052	0.783429	0.487343	0.590666	0.573502	0.379313	0.743013	0.346943	0.493641	0.535669	0.490453
3.19458	0.417644	0.545292	0.147668	0.234584	0.346775	0.653359	0.327505	0.242309	0.370698		0.409233	0.624225	0.487986	NaN	NaN	NaN	NaN	NaN	NaN	NaN	NaN	0.368716	0.587637	0.194833	0.577257	NaN	NaN	0.350955	0.299973	0.560595	0.575825	0.453806	0.591893	0.453936	0.262332	0.258031	0.611667	0.559636	0.683503	0.89337	0.794514	0.377415	0.584852	0.538271	0.492577	0.444367	0.599064	0.411925	0.516373
3.29138	0.410283	0.614441	0.141244	0.238666	0.382873	0.648947	0.344861	0.257672	0.269285		0.393796	0.6358	0.504022	NaN	NaN	NaN	NaN	NaN	NaN	NaN	NaN	0.324373	0.458828	0.444479	0.537838	NaN	NaN	0.253841	0.296655	0.47852	0.751465	0.437426	0.585364	0.482517	0.381152	0.36338	0.688703	0.465281	0.519227	0.682401	0.701113	0.679822	0.578065	0.344021	0.802817	0.436059	0.703177	0.356145	0.64087
3.38819	0.419275	0.543687	0.127847	0.245595	0.385828	0.676652	0.368639	0.32031	0.366743		0.372684	0.68586	0.593971	NaN	NaN	NaN	NaN	NaN	NaN	NaN	NaN	0.226479	0.412034	0.0701882	0.48457	NaN	NaN	0.224519	0.279318	0.442711	0.672544	0.513922	0.512897	0.520957	0.554617	0.533659	0.782583	0.618872	0.532062	0.80129	0.729148	0.873131	0.759751	0.379327	0.603747	0.246503	0.528257	0.38868	0.506491
3.485	0.426877	0.584152	0.071635	0.24762	0.359012	0.656936	0.273474	0.417578	0.400272		0.385277	0.673954	0.549352	NaN	NaN	NaN	NaN	NaN	NaN	NaN	NaN	0.290152	0.424845	0.502238	0.419409	NaN	NaN	0.211239	0.337957	0.49613	0.455004	0.566142	0.555177	0.412831	0.573373	0.55585	0.793819	0.51952	0.443868	0.854598	0.858905	0.849376	0.645489	0.561913	0.647999	0.348781	0.451333	0.493959	0.434256
3.5818	0.425834	0.525175	0.172836	0.240106	0.34094	0.703456	0.249111	0.280899	0.366808		0.415699	0.645188	0.425753	NaN	NaN	NaN	NaN	NaN	NaN	NaN	NaN	0.311483	0.546802	0.338106	0.358868	NaN	NaN	0.263754	0.35654	0.543693	0.548335	0.582205	0.662122	0.399865	0.47461	0.455142	0.803641	0.499597	0.370199	0.805213	0.801093	0.703172	0.588618	0.46756	0.663357	0.322836	0.56318	0.562164	0.56931
3.67861	0.432033	0.534406	0.124788	0.241725	0.38305	0.688119	0.300526	0.31738	0.367555		0.429155	0.615663	0.463412	NaN	NaN	NaN	NaN	NaN	NaN	NaN	NaN	0.308082	0.299672	0.0635436	0.34246	NaN	NaN	0.304409	0.333452	0.536007	0.634596	0.577045	0.67529	0.463975	0.422135	0.426172	0.726205	0.667556	0.675023	0.711236	0.725068	0.510694	0.550095	0.491615	0.655228	0.391584	0.487984	0.511627	0.418985
3.77541	0.424709	0.52754	0.120372	0.246186	0.350002	0.642021	0.318852	0.337414	0.340901		0.425208	0.588097	0.541793	NaN	NaN	NaN	NaN	NaN	NaN	NaN	NaN	0.22118	0.639768	0.271506	0.320533	NaN	NaN	0.215904	0.267949	0.458526	0.488179	0.513419	0.654355	0.47958	0.421378	0.430395	0.778619	0.522446	0.549279	0.747282	0.915419	0.650028	0.555573	0.501156	0.513163	0.339417	0.572848	0.482448	0.681759
3.87222	0.433846	0.499656	0.182237	0.282275	0.400327	0.789744	0.32958	0.235693	0.349519		0.42708	0.583734	0.524993	NaN	NaN	NaN	NaN	NaN	NaN	NaN	NaN	0.285288	0.751932	0.205316	0.395371	NaN	NaN	0.238197	0.303569	0.452425	0.385265	0.536939	0.605328	0.465944	0.407511	0.398205	0.767061	0.67893	0.52334	0.862112	0.771229	0.539284	0.610025	0.444526	0.599508	0.259481	0.45116	0.498525	0.39609
3.96902	0.419303	0.512133	0.13317	0.261466	0.418217	0.796738	0.293492	0.241831	0.317047		0.42684	0.596436	0.468353	NaN	NaN	NaN	NaN	NaN	NaN	NaN	NaN	0.356996	0.54374	0.299598	0.364144	NaN	NaN	0.338529	0.370139	0.614562	0.458336	0.618651	0.530909	0.504028	0.427945	0.420074	0.8118	0.523148	0.41726	0.712078	0.526052	0.776477	0.676242	0.468174	0.500815	0.285302	0.493778	0.437044	0.739361
4.06583	0.439495	0.535274	0.144637	0.27618	0.383436	0.571678	0.295053	0.363445	0.346851		0.381946	0.618459	0.469762	NaN	NaN	NaN	NaN	NaN	NaN	NaN	NaN	0.269505	0.316303	0.51967	0.345596	NaN	NaN	0.276988	0.327949	0.511074	0.436864	0.614971	0.514771	0.535537	0.416478	0.411969	0.837769	0.559355	0.391988	0.606131	0.48525	0.612944	0.553081	0.46495	0.646466	0.419085	0.32833	0.386969	0.435195
4.16263	0.439481	0.529912	0.133104	0.24895	0.411175	0.718652	0.311813	0.217486	0.53023		0.401979	0.603029	0.46294	NaN	NaN	NaN	NaN	NaN	NaN	NaN	NaN	0.339225	0.16668	0.316458	0.402213	NaN	NaN	0.192174	0.256453	0.357399	0.422167	0.538688	0.581926	0.532421	0.432197	0.438229	0.768052	0.598996	0.403252	0.703425	0.893425	0.575204	0.564872	0.517207	0.567149	0.239363	0.426646	0.415675	0.653526
4.25944	0.453602	0.532483	0.187904	0.268414	0.391737	0.698224	0.342514	0.204502	0.285216		0.430463	0.578825	0.491416	NaN	NaN	NaN	NaN	NaN	NaN	NaN	NaN	0.388921	0.603812	0.45266	0.322337	NaN	NaN	0.19664	0.247724	0.385482	0.538444	0.5222	0.641849	0.547626	0.444133	0.454731	0.752654	0.536186	0.529813	0.497843	0.85176	0.464815	0.538774	0.531185	0.486222	0.391062	0.551546	0.361913	0.519837
4.35624	0.422865	0.439586	0.16224	0.299874	0.391544	0.732848	0.362872	0.37864	0.291951		0.375188	0.586134	0.525059	NaN	NaN	NaN	NaN	NaN	NaN	NaN	NaN	0.339664	0.466533	0.415456	0.381607	NaN	NaN	0.265427	0.254506	0.427704	0.645783	0.560027	0.64343	0.540883	0.428834	0.405415	0.758887	0.459371	0.553212	0.976276	0.891494	0.620036	0.597216	0.44686	0.491101	0.242043	0.364219	0.348882	0.627959
4.45305	0.44774	0.4622	0.216451	0.272074	0.389655	0.751302	0.344608	0.426149	0.388535		0.340935	0.591984	0.457766	NaN	NaN	NaN	NaN	NaN	NaN	NaN	NaN	0.35515	0.852594	-0.078782	0.180449	NaN	NaN	0.322379	0.246552	0.437985	0.627929	0.52541	0.586802	0.505621	0.339657	0.341472	0.766154	0.596746	0.591494	0.804858	0.62464	0.696059	0.642066	0.564312	0.724472	0.302247	0.420898	0.331153	0.426014
4.54985	0.437421	0.488175	0.166405	0.298821	0.415722	0.638206	0.317775	0.289361	0.262272		0.350548	0.601594	0.38663	NaN	NaN	NaN	NaN	NaN	NaN	NaN	NaN	0.259038	0.494261	0.401775	0.25049	NaN	NaN	0.294722	0.298702	0.440004	0.490541	0.55586	0.551626	0.491246	0.289252	0.299139	0.923243	0.490344	0.47811	1.0357	0.665015	0.732555	0.549364	0.540287	0.734285	0.193445	0.283265	0.267301	0.59174
4.64666	0.428718	0.47381	0.287766	0.284185	0.419931	0.724042	0.294695	0.383985	0.32821		0.369277	0.590963	0.384811	NaN	NaN	NaN	NaN	NaN	NaN	NaN	NaN	0.381518	0.627574	0.260645	0.288663	NaN	NaN	0.287045	0.333694	0.470007	0.440021	0.643794	0.537818	0.557301	0.296694	0.266924	0.803175	0.488761	0.757969	0.584185	0.724416	0.690979	0.53061	0.457662	0.632327	0.184641	0.462192	0.352106	0.49221
4.74347	0.423889	0.4785	0.28603	0.282558	0.394533	0.550936	0.305343	0.460922	0.118422		0.411256	0.595967	0.419408	NaN	NaN	NaN	NaN	NaN	NaN	NaN	NaN	0.381305	0.360026	0.456945	0.204718	NaN	NaN	0.257763	0.274619	0.478118	0.434055	0.648525	0.534023	0.561543	0.388036	0.344739	0.849058	0.533861	0.592753	0.780879	0.822397	0.534783	0.48425	0.561678	0.454733	0.262931	0.354715	0.242776	0.494542
4.84027	0.370086	0.460836	0.24696	0.321484	0.38173	0.697157	0.287614	0.347145	0.459719		0.444835	0.590381	0.484295	NaN	NaN	NaN	NaN	NaN	NaN	NaN	NaN	0.253673	0.540636	0.141753	0.104665	NaN	NaN	0.233923	0.198837	0.480071	0.439268	0.53627	0.545912	0.469877	0.418835	0.402916	0.856191	0.54303	0.443239	0.845148	0.648342	0.698189	0.498205	0.435241	0.605476	0.43764	0.391929	0.363348	0.594497
4.93708	0.417223	0.460824	0.262902	0.32193	0.422582	0.664394	0.263849	0.173555	0.222244		0.435776	0.551509	0.495121	NaN	NaN	NaN	NaN	NaN	NaN	NaN	NaN	0.255374	0.459972	0.0502568	0.126006	NaN	NaN	0.258555	0.11303	0.502275	0.403333	0.565753	0.531639	0.432614	0.388094	0.367796	0.708809	0.423337	0.663926	0.572295	0.513771	0.92768	0.511309	0.580049	0.418782	0.218714	0.676363	0.51172	0.625503
5.03388	0.456334	0.467802	0.344931	0.325919	0.400376	0.732306	0.259701	0.347705	0.326475		0.419976	0.545869	0.500986	NaN	NaN	NaN	NaN	NaN	NaN	NaN	NaN	0.273173	0.139846	0.518329	0.298475	NaN	NaN	0.355265	0.215191	0.397614	0.359103	0.578598	0.579907	0.464391	0.352705	0.313836	0.698069	0.407287	0.624657	0.660658	0.741797	0.620375	0.600824	0.591108	0.532137	0.358446	0.610161	0.366333	0.602689
5.13069	0.549473	0.516957	0.399027	0.317172	0.371886	0.702679	0.274474	0.486749	0.317354		0.399414	0.557779	0.487019	NaN	NaN	NaN	NaN	NaN	NaN	NaN	NaN	0.308326	0.269329	0.43271	0.268326	NaN	NaN	0.380705	0.275873	0.340804	0.374876	0.5615	0.643226	0.501942	0.317143	0.25592	0.620655	0.746957	0.563496	0.59527	0.79278	0.649395	0.551266	0.385924	0.60362	0.382737	0.581105	0.418533	0.54918
5.22749	0.541565	0.494538	0.435821	0.359509	0.407099	0.779333	0.289381	0.352295	0.46734		0.401212	0.544936	0.424478	NaN	NaN	NaN	NaN	NaN	NaN	NaN	NaN	0.193112	0.567455	0.406222	0.163583	NaN	NaN	0.309245	0.189453	0.370922	0.356062	0.573955	0.655991	0.473534	0.319781	0.259356	0.705284	0.678205	0.568687	0.738517	0.785934	0.668334	0.543915	0.516118	0.57201	0.264058	0.411596	0.38358	0.608693
5.3243	0.535254	0.491349	0.479886	0.302773	0.371308	0.723916	0.300252	0.40928	0.415016		0.423464	0.540585	0.453332	NaN	NaN	NaN	NaN	NaN	NaN	NaN	NaN	0.216328	0.70707	0.375004	0.239678	NaN	NaN	0.298562	0.201243	0.399259	0.35827	0.478422	0.616021	0.423823	0.335354	0.320161	0.716341	0.465666	0.381129	0.507902	0.808487	0.611816	0.578818	0.535003	0.568048	0.26474	0.653706	0.431292	0.488165
5.4211	0.568389	0.510903	0.535684	0.338292	0.367622	0.821486	0.345567	0.314477	0.41745		0.411528	0.549677	0.452851	NaN	NaN	NaN	NaN	NaN	NaN	NaN	NaN	0.217823	0.245451	0.399437	0.149502	NaN	NaN	0.302256	0.218726	0.460723	0.376484	0.447984	0.553045	0.43532	0.38391	0.359224	0.736777	0.482432	0.473345	0.658915	0.480509	0.638346	0.549175	0.514607	0.535816	0.283446	0.468093	0.432803	0.45226
5.51791	0.512615	0.451939	0.54746	0.304922	0.363442	0.679878	0.342628	0.295566	0.37777		0.383182	0.576964	0.454908	NaN	NaN	NaN	NaN	NaN	NaN	NaN	NaN	0.201652	0.235403	0.303547	0.267675	NaN	NaN	0.314859	0.196796	0.610185	0.405001	0.474964	0.483636	0.446664	0.424746	0.413206	0.766095	0.559772	0.581403	0.858556	0.540081	0.854159	0.498048	0.544389	0.567981	0.335389	0.674075	0.263329	0.332527
5.61471	0.578209	0.444836	0.647784	0.301678	0.398374	0.615339	0.297398	0.336249	0.390288		0.360959	0.592127	0.473974	NaN	NaN	NaN	NaN	NaN	NaN	NaN	NaN	0.216675	0.233075	0.391184	0.131393	NaN	NaN	0.348257	0.198704	0.53539	0.44837	0.51628	0.485133	0.407373	0.382926	0.377299	0.590185	0.653825	0.547624	0.81085	0.735569	0.855174	0.484002	0.330904	0.655544	0.290378	0.577917	0.344667	0.227506
5.71152	0.592749	0.479601	0.606138	0.269021	0.368732	0.72503	0.332207	0.444203	0.270056		0.370412	0.579882	0.465075	NaN	NaN	NaN	NaN	NaN	NaN	NaN	NaN	0.171785	0.339837	0.395453	0.087853	NaN	NaN	0.374442	0.235163	0.357823	0.424036	0.520254	0.548058	0.4348	0.388691	0.367533	0.652565	0.455532	0.676074	0.532566	0.504964	0.417333	0.557228	0.411972	0.574339	0.340414	0.64646	0.385533	0.555057
5.80833	0.554131	0.439955	0.540792	0.296245	0.371221	0.494566	0.360307	0.315747	0.273576		0.383975	0.547319	0.435822	NaN	NaN	NaN	NaN	NaN	NaN	NaN	NaN	0.153421	0.332499	0.184044	0.220865	NaN	NaN	0.409568	0.27454	0.44809	0.415308	0.568769	0.580614	0.465787	0.43586	0.434369	0.591332	0.465918	0.649045	0.757983	0.671172	0.580925	0.398488	0.24494	0.738968	0.306566	0.414573	0.450781	0.467498
5.90513	0.615427	0.485301	0.738871	0.308097	0.362183	0.544354	0.328207	0.395739	0.319518		0.347338	0.52117	0.426987	NaN	NaN	NaN	NaN	NaN	NaN	NaN	NaN	0.166857	0.710678	0.410491	0.374258	NaN	NaN	0.390245	0.242911	0.548289	0.426515	0.606994	0.472319	0.438807	0.411939	0.418349	0.689398	0.586279	0.611053	0.745157	0.74768	0.584475	0.403293	0.250576	0.522037	0.235073	0.531784	0.130758	0.383904
6.00194	0.560203	0.468286	0.63616	0.291461	0.351677	0.492314	0.333103	0.428123	0.337517		0.315338	0.526763	0.438149	NaN	NaN	NaN	NaN	NaN	NaN	NaN	NaN	0.235575	0.369177	0.14579	0.555878	NaN	NaN	0.341423	0.281422	0.474272	0.439469	0.604865	0.410129	0.464242	0.398848	0.395845	0.568712	0.467998	0.500381	0.792532	0.921284	0.192797	0.506314	0.511178	0.478263	0.317237	0.640436	0.367261	0.464763
6.09874	0.592578	0.492457	0.689574	0.284953	0.337959	0.630145	0.347526	0.513012	0.322505		0.328741	0.514926	0.389389	NaN	NaN	NaN	NaN	NaN	NaN	NaN	NaN	0.168175	-0.0346167	0.337175	0.612861	NaN	NaN	0.361785	0.289222	0.499343	0.590045	0.578862	0.397889	0.470991	0.456443	0.449225	0.650617	0.576946	0.682487	0.754023	0.834685	0.483811	0.411304	0.383201	0.552558	0.428565	0.507884	0.478024	0.410151
6.19555	0.560223	0.503971	0.659806	0.25003	0.347153	0.470343	0.354533	0.333487	0.426516		0.37383	0.515513	0.384644	NaN	NaN	NaN	NaN	NaN	NaN	NaN	NaN	0.143091	0.266038	0.229498	0.401947	NaN	NaN	0.356817	0.256897	0.564716	0.538076	0.518971	0.457202	0.408631	0.480931	0.459725	0.615385	0.578253	0.470082	0.626291	0.725468	0.567884	0.589411	0.344367	0.610826	0.484482	0.536392	0.312926	0.575203
6.29235	0.614138	0.550504	0.738599	0.25954	0.348316	0.517376	0.366705	0.507923	0.460963		0.376371	0.508141	0.453249	NaN	NaN	NaN	NaN	NaN	NaN	NaN	NaN	0.20496	0.504854	0.7848	0.582988	NaN	NaN	0.300447	0.20912	0.467713	0.44253	0.483954	0.463871	0.360515	0.458042	0.43272	0.671594	0.541229	0.544451	0.757894	0.525662	0.681206	0.475018	0.405315	0.411925	0.231014	0.269922	0.2648	0.52306
6.38916	0.595096	0.55635	0.540408	0.239073	0.337271	0.482365	0.346191	0.658111	0.473395		0.370991	0.467313	0.529659	NaN	NaN	NaN	NaN	NaN	NaN	NaN	NaN	0.125067	0.401135	0.422529	0.801384	NaN	NaN	0.243067	0.155041	0.342469	0.478586	0.520718	0.458972	0.422623	0.486607	0.445094	0.657478	0.534999	0.667264	0.652066	0.812827	0.688288	0.467321	0.278061	0.507807	0.139808	0.431341	0.496444	0.698275
6.48596	0.630353	0.596372	0.598923	0.259918	0.3387	0.446425	0.346695	0.401601	0.578338		0.374308	0.435968	0.600557	NaN	NaN	NaN	NaN	NaN	NaN	NaN	NaN	0.17744	0.380175	0.448391	0.829283	NaN	NaN	0.298403	0.248914	0.335509	0.449993	0.541652	0.479055	0.456666	0.518947	0.486627	0.622422	0.422219	0.591397	0.826095	0.632189	0.74775	0.34837	0.509856	0.534885	0.320985	0.305218	0.215925	0.540486
6.58277	0.573971	0.61316	0.59299	0.23809	0.3276	0.536614	0.361925	0.393126	0.779271		0.350242	0.438018	0.52707	NaN	NaN	NaN	NaN	NaN	NaN	NaN	NaN	0.141948	0.741782	0.136341	0.717697	NaN	NaN	0.353032	0.312059	0.408446	0.424685	0.540649	0.438376	0.412247	0.503217	0.487072	0.611539	0.639004	0.45728	0.692586	0.607536	0.652014	0.434612	0.500317	0.396822	0.389832	0.415801	0.365841	0.350002
6.67957	0.58421	0.5608	0.784617	0.228259	0.322553	0.558906	0.326381	0.606294	0.608733		0.33453	0.423333	0.458059	NaN	NaN	NaN	NaN	NaN	NaN	NaN	NaN	0.192178	0.186693	0.338051	0.728647	NaN	NaN	0.403815	0.220152	0.42907	0.529384	0.530685	0.470944	0.366346	0.477572	0.448515	0.584457	0.59367	0.666249	0.812969	0.615691	0.54181	0.362799	0.444033	0.382559	0.393379	0.388859	0.556121	0.441611
6.77638	0.582195	0.574903	0.758626	0.243334	0.344	0.602077	0.326132	0.615689	0.479468		0.34334	0.43736	0.44231	NaN	NaN	NaN	NaN	NaN	NaN	NaN	NaN	0.161862	0.342519	-0.0528489	0.729369	NaN	NaN	0.415982	0.167833	0.360742	0.663462	0.548413	0.54327	0.391277	0.4471	0.394888	0.494989	0.695922	0.673905	0.785333	0.71968	0.510943	0.442384	0.494996	0.488354	0.30749	0.474979	0.318125	0.498543
6.87318	0.59056	0.50723	0.701115	0.259354	0.35296	0.470016	0.338601	0.573345	0.490129		0.325888	0.439657	0.390143	NaN	NaN	NaN	NaN	NaN	NaN	NaN	NaN	0.174272	0.219206	0.401937	0.781798	NaN	NaN	0.414829	0.177071	0.308844	0.597218	0.597215	0.62477	0.447169	0.414685	0.367775	0.509261	0.598481	0.699974	0.708662	0.988835	0.706988	0.439409	0.369713	0.394198	0.411469	0.514411	0.307056	0.472389
6.96999	0.605511	0.521979	0.85238	0.221378	0.348775	0.539739	0.292617	0.618536	0.580754		0.30552	0.411489	0.367688	NaN	NaN	NaN	NaN	NaN	NaN	NaN	NaN	0.191567	0.328558	0.433079	0.661395	NaN	NaN	0.454747	0.242815	0.43753	0.572967	0.612047	0.61727	0.479203	0.398578	0.378788	0.50003	0.508908	0.716297	0.7547	0.642407	0.416571	0.2636	0.464974	0.451365	0.318991	0.406378	0.304441	0.532179
7.0668	0.56275	0.512456	0.655357	0.246532	0.34643	0.399464	0.258308	0.716347	0.518206		0.319418	0.403974	0.403064	NaN	NaN	NaN	NaN	NaN	NaN	NaN	NaN	0.19342	0.343963	0.788905	0.680549	NaN	NaN	0.458893	0.282322	0.509091	0.523836	0.585008	0.563999	0.50344	0.429774	0.420516	0.444823	0.675396	0.752919	0.5299	0.747872	0.700891	0.3418	0.391422	0.342628	0.499838	0.451365	0.300811	0.36324
7.1636	0.572147	0.514385	0.884249	0.221239	0.329209	0.49357	0.311806	0.588044	0.609806		0.361163	0.391231	0.444429	NaN	NaN	NaN	NaN	NaN	NaN	NaN	NaN	0.23082	0.718795	0.160715	0.610125	NaN	NaN	0.459833	0.303772	0.448468	0.416039	0.576651	0.543007	0.49777	0.468474	0.455108	0.400369	0.594561	0.776559	0.729744	0.587302	0.724253	0.332544	0.41104	0.43836	0.345823	0.490666	0.302526	0.365243
7.26041	0.532914	0.562925	0.860773	0.214795	0.330569	0.566414	0.337659	0.680256	0.540986		0.384106	0.348465	0.413956	NaN	NaN	NaN	NaN	NaN	NaN	NaN	NaN	0.177713	0.183902	0.323552	0.464619	NaN	NaN	0.538863	0.269343	0.414604	0.49826	0.624176	0.448091	0.474598	0.442898	0.4297	0.362724	0.659831	0.759171	0.68511	0.68141	0.49254	0.33026	0.33362	0.424522	0.341731	0.306642	0.452115	0.466942
7.35721	0.539253	0.595074	0.883484	0.236906	0.325867	0.506573	0.350918	0.50693	0.441357		0.388106	0.351957	0.436074	NaN	NaN	NaN	NaN	NaN	NaN	NaN	NaN	0.109859	-0.0452803	0.163002	0.649239	NaN	NaN	0.526796	0.250831	0.351563	0.567172	0.607003	0.360771	0.441372	0.412298	0.411431	0.453576	0.653578	0.754569	1.0031	1.00515	0.947433	0.2512	0.446658	0.408988	0.45359	0.235198	0.354004	0.401742
7.45402	0.510708	0.584854	0.84666	0.213708	0.343646	0.431548	0.342758	0.669666	0.613609		0.364141	0.381517	0.490793	NaN	NaN	NaN	NaN	NaN	NaN	NaN	NaN	0.120439	0.188995	0.151415	0.578634	NaN	NaN	0.477056	0.192123	0.375701	0.499577	0.5368	0.402336	0.478191	0.374882	0.378596	0.477807	0.66473	0.67161	0.970654	0.732444	0.568079	0.370834	0.330452	0.419647	0.525028	0.292098	0.441672	0.536207
7.55082	0.530736	0.573408	1.02909	0.229957	0.309707	0.568352	0.332109	0.5325	0.650135		0.325056	0.387477	0.504931	NaN	NaN	NaN	NaN	NaN	NaN	NaN	NaN	0.113892	0.435365	0.0755031	0.445641	NaN	NaN	0.487373	0.149639	0.496914	0.415345	0.507741	0.484031	0.461424	0.410779	0.411707	0.488055	0.536335	0.838986	0.745169	0.858402	0.772149	0.425802	0.473861	0.433667	0.506654	0.335391	0.357993	0.513224
7.64763	0.541085	0.548575	0.876103	0.216064	0.31537	0.520738	0.329461	0.662648	0.659034		0.304058	0.335833	0.496179	NaN	NaN	NaN	NaN	NaN	NaN	NaN	NaN	0.186523	0.328661	0.309108	0.554049	NaN	NaN	0.458207	0.243423	0.522395	0.460172	0.501751	0.455622	0.385071	0.394766	0.393921	0.420557	0.589849	0.722991	0.815741	0.694929	0.812982	0.505237	0.41324	0.383031	0.511078	0.390289	0.406295	0.41301
7.74443	0.508654	0.51456	0.830617	0.205054	0.309788	0.542022	0.357035	0.660568	0.623135		0.272984	0.278369	0.417464	NaN	NaN	NaN	NaN	NaN	NaN	NaN	NaN	0.11825	0.493711	0.174303	0.560432	NaN	NaN	0.466217	0.263419	0.517236	0.466448	0.481891	0.457799	0.414614	0.383036	0.389531	0.47809	0.699988	0.464982	1.03002	1.05228	0.571597	0.461171	0.386633	0.386771	0.576803	0.401904	0.465838	0.433534
7.84124	0.536693	0.510884	0.757791	0.218613	0.317354	0.550295	0.385378	0.941982	0.642633		0.251083	0.311362	0.415461	NaN	NaN	NaN	NaN	NaN	NaN	NaN	NaN	0.107606	0.48059	0.212275	0.470399	NaN	NaN	0.41881	0.241961	0.401402	0.455893	0.424523	0.458239	0.385881	0.466139	0.455705	0.371572	0.595909	0.640962	0.776959	0.830544	0.745447	0.460235	0.342782	0.423909	0.475172	0.412873	0.445483	0.49438
7.93804	0.556512	0.473937	0.81242	0.216223	0.291881	0.460636	0.346505	0.699299	0.643314		0.271994	0.359786	0.3697	NaN	NaN	NaN	NaN	NaN	NaN	NaN	NaN	0.155545	0.015795	0.328444	0.466722	NaN	NaN	0.428669	0.232539	0.451706	0.502418	0.41999	0.368137	0.344071	0.422081	0.406988	0.347207	0.732687	0.662839	0.788967	0.779493	0.659802	0.363727	0.382381	0.330143	0.308715	0.295777	0.344168	0.505547
8.03485	0.53016	0.4967	0.886329	0.213612	0.312421	0.508198	0.289943	0.82719	0.609252		0.306506	0.331733	0.295669	NaN	NaN	NaN	NaN	NaN	NaN	NaN	NaN	0.12566	0.547827	0.214168	0.397656	NaN	NaN	0.463479	0.246073	0.458199	0.474315	0.419882	0.380295	0.387884	0.347963	0.340721	0.357563	0.718814	0.648303	0.720686	0.682527	0.817351	0.366135	0.336531	0.454902	0.50989	0.471794	0.346049	0.37176
8.13166	0.481895	0.4861	0.700522	0.229326	0.320465	0.336655	0.321365	0.698082	0.619399		0.311497	0.2956	0.309206	NaN	NaN	NaN	NaN	NaN	NaN	NaN	NaN	0.109539	0.422131	0.262119	0.391438	NaN	NaN	0.380715	0.273803	0.426674	0.338354	0.381361	0.404308	0.406323	0.361743	0.364654	0.414685	0.540526	0.515634	0.980844	0.714473	0.690352	0.452906	0.293597	0.490472	0.484515	0.392266	0.471807	0.398296
[truncated: 48 more columns]

## Sheet: 1G.iv.
Figure 1 G.iv.
VTA roi	VTA axon Slope	R-squared		LC roi	LC axon Slope	R-squared
ROI 1	-0.113927	0.897982		ROI 1	0.0301633	0.487047
ROI 2	0.000722253	0.000944731		ROI 2	0.111011	0.690778
ROI 3	-0.232696	0.836282		ROI 3	0.0396603	0.429264
ROI 4	-0.0255345	0.52953		ROI 4	0	NaN
ROI 5	-0.0484158	0.773742		ROI 5	0	NaN
ROI 6	-0.0607931	0.253768		ROI 6	0	NaN
ROI 7	-0.00166565	0.00110737		ROI 7	0	NaN
ROI 8	-0.141455	0.645931		ROI 8	0	NaN
ROI 9	-0.0661348	0.256793		ROI 9	0	NaN
				ROI 10	0	NaN
				ROI 11	0	NaN
				ROI 12	0.0534844	0.35805
				ROI 13	0.192901	0.375196
				ROI 14	-0.043166	0.0301482
				ROI 15	-0.108402	0.784926
				ROI 16	0	NaN
				ROI 17	0	NaN
				ROI 18	0.0482241	0.212871
				ROI 19	0.0692538	0.282316
				ROI 20	-0.0249305	0.0594595
				ROI 21	0.0522811	0.225662
				ROI 22	0.0750383	0.496819
				ROI 23	-0.0173262	0.0446911
				ROI 24	0.113154	0.528165
				ROI 25	0.0622992	0.475941
				ROI 26	0.0644829	0.501933
				ROI 27	-0.00832101	0.00767675
				ROI 28	0.117138	0.487509
				ROI 29	0.0956202	0.244832
				ROI 30	0.15775	0.445625
				ROI 31	0.0975739	0.18324
				ROI 32	0.135214	0.31385
				ROI 33	0.098601	0.421703
				ROI 34	0.0582381	0.188569
				ROI 35	0.088129	0.453523
				ROI 36	0.00165439	0.000128812
				ROI 37	0.141749	0.493805
				ROI 38	0.0399713	0.158751
				ROI 39	0.0912567	0.338128
				ROI 40	0.159164	0.482625
				ROI 41	0.203125	0.687162
				ROI 42	0	NaN
				ROI 43	0	NaN
				ROI 44	0.0535931	0.254052
				ROI 45	0.113608	0.503936
				ROI 46	-0.01761	0.0206037
				ROI 47	0.0554834	0.268803
				ROI 48	0.104312	0.462289
				ROI 49	0.102323	0.223512
				ROI 50	0.135924	0.70836
				ROI 51	0.0979569	0.532921
				ROI 52	0.101503	0.537421
				ROI 53	0.0777035	0.323086
				ROI 54	0.1098	0.636052
				ROI 55	-8.7351e-05	1.58129e-07
				ROI 56	0.118038	0.30978
				ROI 57	-0.0375973	0.0267152
				ROI 58	0.130845	0.203074
				ROI 59	0.0613403	0.294247
				ROI 60	0.0209812	0.0383174
				ROI 61	0.0434157	0.164051
				ROI 62	0.0644677	0.281009
				ROI 63	0.0610066	0.539326
				ROI 64	0.0642791	0.367779
				ROI 65	0.12323	0.738158
				ROI 66	0.0594033	0.469287
				ROI 67	0.0307709	0.247162
				ROI 68	-0.00161642	0.00109679
				ROI 69	0.0528454	0.382234
				ROI 70	0.0869619	0.541071
				ROI 71	0.0801217	0.621611
				ROI 72	0.110177	0.625535
				ROI 73	0.110345	0.651775
				ROI 74	0.0480816	0.160584
				ROI 75	0.0736941	0.211809
				ROI 76	0.12663	0.412016
				ROI 77	0.100647	0.241953
				ROI 78	0.155258	0.469344
				ROI 79	0.13188	0.429893
				ROI 80	0.0641214	0.0886315
				ROI 81	0.0232065	0.013512
				ROI 82	0.0615746	0.10979
				ROI 83	0.0866685	0.102641
				ROI 84	-0.00807078	0.00221609
				ROI 85	0.0686301	0.106798
				ROI 86	0.0421726	0.0733013
				ROI 87	0.142221	0.643967
