# Supplementary material for: Distinct catecholaminergic pathways projecting to hippocampal CA1 transmit contrasting signals during navigation in familiar and novel environments
Source: eLife. 2024 Nov 6;13:RP95213. doi: 10.7554/eLife.95213 (PMC11540301; doi:10.7554/eLife.95213)
Supplement: Figure 2—source data 1. [file elife-95213-fig2-data1.xlsx]

## Sheet: 2bi
Fig 2 bi
	VTA reward bin mean F							VTA no reward bin mean F
bin	1	2	3	4	5	6		1	2	3	4	5	6
1	0.357404	0.22932	0.297132	0.24796	0.403363	0.440875		0.313464	0.315662	0.174828	0.200876	0.250451	0.358481
2	0.336155	0.24099	0.249466	0.250907	0.363101	0.390168		0.325309	0.321759	0.129908	0.191217	0.203159	0.387068
3	0.344652	0.246574	0.246995	0.244136	0.35657	0.416204		0.328746	0.329495	0.136778	0.201601	0.203875	0.430783
4	0.35006	0.294597	0.229151	0.234744	0.385867	0.343809		0.322866	0.317499	0.0984282	0.187859	0.229281	0.415492
5	0.332776	0.307126	0.190725	0.25376	0.397902	0.348719		0.309661	0.329279	0.087271	0.215712	0.236908	0.441314
6	0.333902	0.313613	0.17882	0.248613	0.407282	0.394514		0.305444	0.334518	0.0999867	0.204434	0.219787	0.527402
7	0.333674	0.298467	0.120731	0.249547	0.394526	0.449456		0.341202	0.362435	0.107396	0.177162	0.245173	0.432859
8	0.345385	0.336114	0.19089	0.228151	0.417398	0.367736		0.345482	0.330427	0.095999	0.185075	0.221751	0.484533
9	0.337534	0.338371	0.139432	0.249283	0.425791	0.411536		0.342788	0.360639	0.0711306	0.202202	0.239251	0.500146
10	0.339518	0.379038	0.142838	0.240682	0.388478	0.403763		0.355303	0.389439	0.112467	0.185729	0.232067	0.388152
11	0.350328	0.350579	0.133553	0.25224	0.42823	0.485584		0.369947	0.396133	0.0970864	0.190001	0.272547	0.545501
12	0.366482	0.375778	0.141789	0.250173	0.414195	0.416872		0.395785	0.414622	0.0943667	0.175582	0.262769	0.480648
13	0.327927	0.399546	0.162808	0.255388	0.384721	0.530123		0.418593	0.402604	0.107892	0.215144	0.230319	0.428681
14	0.343996	0.429078	0.12167	0.267924	0.466871	0.456347		0.379994	0.421111	0.11067	0.162388	0.230798	0.473086
15	0.358406	0.441191	0.139847	0.2704	0.408841	0.54389		0.39143	0.396699	0.0797934	0.188323	0.275712	0.485887
16	0.347474	0.474247	0.122752	0.283251	0.407802	0.481126		0.374036	0.410063	0.101945	0.204275	0.26848	0.428596
17	0.355049	0.465347	0.116939	0.330231	0.379233	0.567537		0.437597	0.424447	0.112457	0.209347	0.218103	0.507512
18	0.363155	0.461786	0.112678	0.281806	0.441105	0.600575		0.439354	0.403737	0.0813777	0.220006	0.245358	0.536669
19	0.371392	0.458893	0.115024	0.308368	0.438969	0.627329		0.420616	0.442772	0.0856907	0.201608	0.269165	0.537419
20	0.386822	0.497538	0.121087	0.289054	0.452915	0.504506		0.41774	0.440728	0.114925	0.209014	0.259893	0.579942
21	0.367537	0.544356	0.157435	0.266316	0.392082	0.604431		0.423586	0.43891	0.105327	0.194643	0.232146	0.565687
22	0.38095	0.534616	0.1311	0.30314	0.45601	0.747792		0.41025	0.467203	0.0806644	0.211778	0.239357	0.550446
23	0.397369	0.521766	0.14755	0.283857	0.450284	0.638521		0.427105	0.473069	0.127975	0.205551	0.260948	0.553611
24	0.397633	0.533713	0.153561	0.282254	0.450975	0.644705		0.446691	0.463523	0.0950037	0.185487	0.264295	0.526476
25	0.417195	0.534715	0.181407	0.299915	0.454622	0.791571		0.46353	0.453157	0.101934	0.197288	0.234639	0.532094
26	0.395188	0.509165	0.183097	0.26917	0.43227	0.664108		0.467423	0.457578	0.165901	0.192964	0.275013	0.527736
27	0.402036	0.525681	0.165298	0.266533	0.428245	0.524382		0.466055	0.458529	0.158696	0.224733	0.288199	0.618612
28	0.405989	0.514495	0.211958	0.295101	0.444896	0.659048		0.453411	0.464063	0.18074	0.198521	0.234876	0.57028
29	0.399822	0.523451	0.184806	0.311673	0.446279	0.720465		0.494234	0.45676	0.142668	0.174453	0.271722	0.606597
30	0.431477	0.551344	0.218424	0.274134	0.462891	0.645746		0.443421	0.456706	0.139536	0.183902	0.291367	0.614223
31	0.40037	0.528622	0.199967	0.285904	0.451782	0.715599		0.459329	0.462486	0.177103	0.186033	0.23731	0.51852
32	0.408749	0.502432	0.245111	0.33456	0.461556	0.668979		0.429524	0.460818	0.147095	0.209177	0.270642	0.611376
33	0.409323	0.528017	0.271373	0.278939	0.459003	0.63822		0.437376	0.473154	0.138813	0.17788	0.238401	0.618069
34	0.380206	0.555191	0.28699	0.296534	0.484132	0.611226		0.424295	0.475331	0.164063	0.207562	0.261626	0.575962
35	0.421139	0.563486	0.269341	0.293029	0.423969	0.623952		0.452225	0.469002	0.16918	0.203386	0.26157	0.554297
36	0.436477	0.545223	0.228693	0.282747	0.469552	0.616063		0.422721	0.451919	0.213113	0.214428	0.230641	0.539431
37	0.412139	0.616916	0.34973	0.305566	0.464673	0.461661		0.434273	0.470718	0.20026	0.222261	0.252416	0.560521
38	0.430884	0.531797	0.436398	0.319075	0.451411	0.684222		0.39826	0.453849	0.223428	0.22687	0.244299	0.560706
39	0.430091	0.573936	0.365934	0.266955	0.477553	0.643214		0.374106	0.436678	0.251589	0.214743	0.281237	0.527016
40	0.426744	0.538303	0.425305	0.308387	0.448981	0.578181		0.434519	0.432723	0.241793	0.23192	0.287417	0.569868
41	0.412689	0.55158	0.474686	0.308615	0.487978	0.712878		0.386054	0.423353	0.317575	0.247954	0.25931	0.574635
42	0.462425	0.548631	0.472945	0.287489	0.431216	0.607604		0.390159	0.442496	0.298895	0.234039	0.264589	0.524177
43	0.438302	0.568224	0.487134	0.290178	0.463483	0.624694		0.407079	0.415589	0.323377	0.266475	0.23218	0.533762
44	0.461986	0.533139	0.525156	0.2879	0.429494	0.600058		0.380208	0.408192	0.316213	0.23291	0.269656	0.570654
45	0.443079	0.496943	0.616823	0.271926	0.465079	0.601352		0.410371	0.377987	0.30749	0.221011	0.22852	0.568646
46	0.431576	0.545736	0.585498	0.279414	0.468884	0.632911		0.367418	0.394379	0.311092	0.231528	0.227583	0.502399
47	0.471448	0.516056	0.585565	0.293408	0.4592	0.629853		0.367232	0.379019	0.31121	0.205535	0.259385	0.490542
48	0.474399	0.554731	0.62696	0.281117	0.471474	0.598143		0.348228	0.396665	0.35693	0.256439	0.277871	0.50169
49	0.461105	0.541875	0.571845	0.264974	0.454218	0.586367		0.31878	0.406917	0.370171	0.24413	0.27906	0.54945
50	0.509551	0.548369	0.612823	0.283668	0.469072	0.593153		0.342056	0.396349	0.386373	0.240878	0.259173	0.487188
51	0.468769	0.573884	0.653381	0.280663	0.438357	0.559042		0.36686	0.421239	0.384526	0.235614	0.284402	0.511458
52	0.46687	0.570408	0.702129	0.317923	0.471493	0.530314		0.357902	0.424022	0.316749	0.256929	0.219287	0.447489
53	0.520523	0.555629	0.715442	0.308257	0.458248	0.515329		0.359404	0.428629	0.316478	0.242089	0.267215	0.448751
54	0.546524	0.554872	0.741451	0.332599	0.444452	0.589383		0.327942	0.395507	0.361227	0.248365	0.25568	0.479671
55	0.578547	0.540229	0.820216	0.313039	0.439624	0.538261		0.313643	0.404307	0.416234	0.251304	0.263148	0.424357
56	0.605616	0.560212	0.885653	0.339794	0.495194	0.553606		0.336197	0.402173	0.454389	0.264721	0.286729	0.441072
57	0.610935	0.584784	0.850598	0.337577	0.468906	0.50775		0.368651	0.417414	0.48798	0.285521	0.242885	0.443559
58	0.637313	0.620832	0.907207	0.360954	0.481967	0.523643		0.378116	0.43182	0.454727	0.291089	0.261883	0.380673
59	0.676746	0.590264	0.938662	0.385524	0.466979	0.523932		0.365961	0.416161	0.426936	0.296636	0.245331	0.372214
60	0.519672	0.547192	0.63109	0.329229	0.465793	0.509616		0.359308	0.380044	0.325171	0.253317	0.275662	0.349192

## Sheet: 2bii
Figure 2 b.ii
	VTA rewarded velocity binned F								VTA unrewarded velocity binned F
bin	roi 1	roi 2	roi 3	roi 4	roi 5	roi 6		bin	roi 1	roi 2	roi 3	roi 4	roi 5	roi 6
1	0.449027	0.270766	0.503409	0.292712	0.427625	0.473908		1	0.368372	0.323607	0.269382	0.201456	0.243838	0.264699
2	0.410596	0.298321	0.472439	0.313508	0.43096	0.458476		2	0.343192	0.340548	0.239704	0.195662	0.244297	0.272409
3	0.442236	0.312948	0.432566	0.341038	0.447305	0.435357		3	0.357333	0.32109	0.198525	0.198362	0.240644	0.328837
4	0.433843	0.336987	0.351947	0.29559	0.430617	0.390751		4	0.299801	0.359318	0.297694	0.182681	0.236687	0.4311
5	0.437018	0.303804	0.247211	0.280264	0.420756	0.375627		5	0.36222	0.349575	0.257239	0.210251	0.212081	0.38253
6	0.466157	0.436975	0.579244	0.27441	0.421848	0.449986		6	0.354817	0.35714	0.195614	0.195657	0.245419	0.429217
7	0.53515	0.365692	0.41618	0.281126	0.505842	0.361301		7	0.39854	0.419417	0.177374	0.198845	0.237717	0.434585
8	0.396651	0.443974	0.535227	0.260207	0.499142	0.597126		8	0.350072	0.38167	0.292357	0.217187	0.245882	0.450691
9	0.439483	0.394996	0.58534	0.308323	0.462361	0.561689		9	0.365044	0.379713	0.268145	0.191838	0.184751	0.499083
10	0.401172	0.443565	0.665613	0.338592	0.436835	0.359762		10	0.365049	0.389845	0.450147	0.223901	0.235848	0.467263
11	0.393983	0.4309	0.687681	0.336494	0.499916	0.316399		11	0.31352	0.363332	0.391343	0.235021	0.180751	0.522719
12	0.344999	0.467074	0.722367	0.298976	0.505855	0.446177		12	0.35612	0.332351	0.325042	0.21935	0.251902	0.41287
13	0.329034	0.443638	0.647151	0.30581	0.481542	0.422473		13	0.327932	0.405683	0.476766	0.224962	0.215819	0.450405
14	0.321147	0.542811	0.654044	0.366717	0.439229	0.480298		14	0.33217	0.367096	0.399427	0.256977	0.279162	0.496205
15	0.308632	0.453956	0.586551	0.31865	0.542015	0.599945		15	0.303008	0.389415	0.362733	0.22423	0.267701	0.500036
16	0.400271	0.522773	0.363142	0.384457	0.49749	0.644606		16	0.3138	0.390377	0.253566	0.21039	0.257677	0.54161
17	0.384468	0.468698	0.521068	0.362056	0.484756	0.502967		17	0.318699	0.375582	0.275553	0.224521	0.22329	0.553678
18	0.30603	0.476616	0.426581	0.341229	0.412889	0.564872		18	0.344579	0.37071	0.320894	0.200388	0.200089	0.514637
19	0.385617	0.473259	0.481082	0.302041	0.474673	0.604614		19	0.334529	0.394811	0.285058	0.192383	0.254081	0.543112
20	0.451534	0.395519	0.412597	0.325124	0.504817	0.602662		20	0.358023	0.401707	0.32815	0.167724	0.207631	0.507945
21	0.382356	0.488159	0.460241	0.324325	0.489064	0.58671		21	0.367593	0.402178	0.299447	0.230449	0.231881	0.517319
22	0.406006	0.4372	0.517278	0.358963	0.538235	0.593296		22	0.364153	0.433721	0.27571	0.221722	0.299633	0.557881
23	0.421968	0.465626	0.443287	0.293829	0.479693	0.589129		23	0.37355	0.414811	0.337629	0.2112	0.248475	0.54432
24	0.429097	0.438535	0.424626	0.288983	0.486638	0.506286		24	0.378926	0.425921	0.309013	0.201734	0.25062	0.513795
25	0.44679	0.499597	0.375974	0.313433	0.485279	0.46181		25	0.406741	0.429015	0.229868	0.239272	0.273468	0.49119
26	0.397061	0.494121	0.428999	0.313202	0.436176	0.501808		26	0.388363	0.414217	0.221391	0.218098	0.252614	0.485149
27	0.412064	0.485863	0.299576	0.274609	0.485039	0.438593		27	0.418674	0.457118	0.161753	0.246734	0.269425	0.486571
28	0.417069	0.460256	0.3505	0.280846	0.48382	0.406127		28	0.393116	0.429114	0.19148	0.205218	0.257947	0.423567
29	0.472753	0.532965	0.267654	0.280714	0.514112	0.443916		29	0.433357	0.400763	0.192634	0.222534	0.273576	0.4532
30	0.459302	0.475505	0.390769	0.321511	0.459397	0.320799		30	0.413637	0.439761	0.136553	0.224474	0.241602	0.452892
31	0.386758	0.519433	0.368677	0.299607	0.41835	0.299611		31	0.467392	0.449746	0.150335	0.220915	0.232864	0.237184
32	0.449441	0.465388	0.346861	0.333184	0.482306	0.423089		32	0.478663	0.42901	0.146121	0.223627	0.260553	0.29158
33	0.475609	0.488646	0.404243	0.289553	0.481738	NaN		33	0.465508	0.39787	0.181602	0.212406	0.247311	0.382922
34	0.499842	0.530413	0.205836	0.28724	0.451952	NaN		34	0.519544	0.41585	0.149307	0.220115	0.235986	0.277276
35	0.403323	0.588008	0.27527	0.27222	0.45392	NaN		35	0.583897	0.450921	0.257087	0.239187	0.288707	0.330184
36	0.449855	0.556792	0.395331	0.267043	0.448278	NaN		36	0.577451	0.48714	0.141908	0.258835	0.267179	0.0436931
37	0.505381	0.494803	0.268527	0.278096	0.44019	NaN		37	0.55557	0.420824	0.169735	0.215322	0.263103	0.341949
38	0.475382	0.524522	0.20246	0.264375	0.446716	NaN		38	0.476882	0.415586	0.184879	0.261489	0.224068	NaN
39	0.475685	0.615461	0.233164	0.274081	0.409513	NaN		39	0.511641	0.403156	0.136771	0.24139	0.235605	NaN
40	0.487229	0.537909	0.319712	0.267188	0.42829	NaN		40	0.634942	0.438438	0.140653	0.232772	0.306177	NaN
41	0.435135	0.642264	0.285492	0.24824	0.438303	NaN		41	0.722763	0.429233	0.1802	0.169886	0.289119	NaN
42	0.552899	0.544078	0.154518	0.256305	0.448814	NaN		42	0.701338	0.397173	0.135816	0.19967	0.247544	NaN
43	0.531247	0.556684	0.272313	0.283962	0.394033	NaN		43	NaN	0.338723	0.126889	0.22926	0.245589	NaN
44	0.5014	0.762842	0.360472	0.270291	0.428858	NaN		44	NaN	0.406511	0.281591	0.259282	0.239699	NaN
45	0.535823	0.763134	0.268128	0.249405	0.463259	NaN		45	0.857052	0.285388	0.296495	NaN	0.270014	NaN
46	0.547424	0.663944	0.458944	0.248774	0.42264	NaN		46	NaN	0.31285	0.270475	NaN	0.242724	NaN
47	0.53988	0.763995	0.294966	0.240733	0.43578	0.933652		47	NaN	NaN	0.127866	NaN	0.287356	NaN
48	0.559591	NaN	0.241926	0.257014	0.419044	NaN		48	NaN	NaN	0.118655	NaN	0.276221	NaN
49	0.595639	NaN	NaN	0.231595	0.365274	NaN		49	NaN	NaN	0.175643	NaN	0.266485	NaN
50	0.425216	NaN	0.203736	0.244348	0.388317	NaN		50	NaN	NaN	NaN	NaN	0.310585	NaN
51	0.526321	NaN	0.250917	0.258219	0.421723	NaN		51	NaN	NaN	NaN	NaN	0.281743	NaN
52	0.546206	NaN	NaN	0.232157	0.408638	1.10038		52	NaN	NaN	NaN	NaN	0.225234	NaN
53	0.577274	NaN	NaN	0.212942	0.401156	NaN		53	NaN	NaN	NaN	NaN	0.250354	NaN
54	NaN	NaN	NaN	0.234317	0.420115	NaN		54	NaN	NaN	NaN	NaN	0.243833	NaN
55	NaN	NaN	NaN	0.25431	0.383713	NaN		55	NaN	NaN	NaN	NaN	0.220019	NaN
56	NaN	NaN	NaN	0.271341	0.355582	NaN		56	NaN	NaN	NaN	NaN	0.310423	NaN
57	NaN	NaN	NaN	0.278031	0.323258	NaN		57	NaN	NaN	NaN	NaN	0.274076	NaN
58	NaN	NaN	NaN	0.220769	0.402324	NaN		58	NaN	NaN	NaN	NaN	0.291996	NaN
59	NaN	NaN	NaN	0.287648	0.37205	NaN		59	NaN	NaN	NaN	NaN	0.281564	NaN
60	NaN	NaN	NaN	0.268575	0.319477	NaN		60	NaN	NaN	NaN	NaN	0.190388	NaN

## Sheet: 2biii
Figure 2 b.iii
	VTA rewarded mean F aligned to motion initiation								VTA unrewarded mean F aligned to motion initiation
time from motion onset	roi 1	roi 2	roi 3	roi 4	roi 5	roi 6		time from motion onset	roi 1	roi 2	roi 3	roi 4	roi 5	roi 6
-1.93611	0.545146	0.287598	1.01131	0.292575	0.391236	0.61842		-1.93611	0.381227	0.268797	0.301014	0.227952	0.244513	0.304631
-1.8393	0.530021	0.295615	0.69047	0.239038	0.386734	0.748445		-1.8393	0.36931	0.270296	0.272047	0.226921	0.265139	0.288388
-1.7425	0.487597	0.264217	0.638441	0.231318	0.359739	0.705221		-1.7425	0.407096	0.263289	0.305376	0.218189	0.263217	0.29143
-1.64569	0.485073	0.276864	0.679878	0.260799	0.374981	0.654286		-1.64569	0.38365	0.252255	0.329056	0.245953	0.245538	0.31649
-1.54889	0.441803	0.2875	0.70634	0.233351	0.379652	0.515711		-1.54889	0.397306	0.249472	0.260314	0.212364	0.276024	0.320012
-1.45208	0.41389	0.274547	0.587699	0.225703	0.325715	0.411658		-1.45208	0.376711	0.27543	0.282049	0.206956	0.256501	0.3042
-1.35528	0.450529	0.296222	0.612791	0.266298	0.365621	0.50452		-1.35528	0.365619	0.237608	0.291406	0.212905	0.271866	0.21209
-1.25847	0.442309	0.30449	0.657066	0.239219	0.339222	0.554666		-1.25847	0.4113	0.260895	0.247975	0.19031	0.277481	0.26406
-1.16167	0.385593	0.281042	0.595978	0.26217	0.359489	0.554277		-1.16167	0.356071	0.271474	0.235187	0.207763	0.252751	0.270471
-1.06486	0.384586	0.257971	0.581637	0.229452	0.345896	0.582415		-1.06486	0.359148	0.262938	0.262518	0.177819	0.26829	0.21147
-0.968054	0.370843	0.268073	0.583322	0.244414	0.290706	0.493302		-0.968054	0.375546	0.226209	0.257341	0.226202	0.258926	0.297734
-0.871249	0.348488	0.272878	0.487708	0.228276	0.297566	0.608103		-0.871249	0.367305	0.252533	0.20641	0.197837	0.252138	0.245089
-0.774443	0.36464	0.269206	0.584323	0.205376	0.324565	0.548351		-0.774443	0.353952	0.222337	0.229335	0.188319	0.242584	0.22671
-0.677638	0.349425	0.249243	0.396351	0.238003	0.346598	0.494541		-0.677638	0.365967	0.255498	0.230863	0.213832	0.221313	0.218509
-0.580833	0.379282	0.258632	0.41142	0.233066	0.329366	0.496499		-0.580833	0.321138	0.27227	0.200036	0.148699	0.280635	0.235094
-0.484027	0.334378	0.295559	0.572494	0.204431	0.287249	0.556301		-0.484027	0.308977	0.268928	0.189047	0.162074	0.227778	0.263196
-0.387222	0.311507	0.287106	0.459095	0.23419	0.307038	0.682258		-0.387222	0.308221	0.309096	0.193951	0.194596	0.211266	0.272088
-0.290416	0.309055	0.2869	0.365488	0.201914	0.3088	0.583111		-0.290416	0.301369	0.278814	0.153999	0.174855	0.268553	0.226321
-0.193611	0.271787	0.272584	0.373426	0.230307	0.298143	0.548362		-0.193611	0.27208	0.301788	0.151897	0.190357	0.197844	0.341718
-0.0968054	0.283172	0.302517	0.321766	0.195313	0.302293	0.525093		-0.0968054	0.284606	0.298727	0.126844	0.128	0.222042	0.324691
-2.22045e-16	0.290951	0.29377	0.428988	0.194052	0.301555	0.566549		-2.22045e-16	0.304236	0.310632	0.126918	0.212187	0.226062	0.299613
0.0968054	0.259887	0.248922	0.269255	0.208537	0.254933	0.533487		0.0968054	0.311451	0.329181	0.110727	0.207389	0.232583	0.413157
0.193611	0.239865	0.283611	0.286885	0.192635	0.268711	0.448378		0.193611	0.30346	0.310197	0.0612697	0.186824	0.202562	0.31797
0.290416	0.277709	0.274318	0.237881	0.228865	0.29551	0.423592		0.290416	0.268746	0.325395	0.0889003	0.180011	0.207147	0.443746
0.387222	0.314457	0.310267	0.252149	0.199674	0.266761	0.422247		0.387222	0.276116	0.31885	0.131089	0.226155	0.197343	0.415352
0.484027	0.29129	0.274121	0.286008	0.182058	0.314529	0.384768		0.484027	0.27973	0.301274	0.121321	0.154689	0.205052	0.48807
0.580833	0.312269	0.356545	0.230432	0.193907	0.271348	0.416715		0.580833	0.285871	0.300902	0.0860731	0.162784	0.245668	0.448264
0.677638	0.317852	0.402287	0.301824	0.240389	0.31393	0.428424		0.677638	0.317077	0.324267	0.065478	0.203312	0.220077	0.410289
0.774443	0.348699	0.435704	0.270682	0.207586	0.297024	0.318313		0.774443	0.277171	0.339	0.104354	0.187435	0.209019	0.417503
0.871249	0.385777	0.460586	0.276216	0.196258	0.334026	0.301382		0.871249	0.296826	0.284631	0.0892135	0.183647	0.192135	0.460932
0.968054	0.366936	0.382179	0.190504	0.220362	0.320653	0.285177		0.968054	0.300735	0.358519	0.0843103	0.187871	0.232134	0.4028
1.06486	0.347813	0.421022	0.282337	0.182406	0.321458	0.432726		1.06486	0.305684	0.38587	0.0842665	0.206776	0.203949	0.427473
1.16167	0.390964	0.400382	0.260899	0.209506	0.294684	0.455573		1.16167	0.277736	0.375043	0.0474958	0.2411	0.281531	0.370254
1.25847	0.337719	0.41605	0.15791	0.239744	0.323062	0.350571		1.25847	0.290358	0.359637	0.0823787	0.219123	0.247706	0.534341
1.35528	0.337882	0.389848	0.177754	0.236137	0.339735	0.346732		1.35528	0.33022	0.382783	0.0807321	0.219822	0.221904	0.468077
1.45208	0.379269	0.395633	0.150039	0.238574	0.335681	0.590294		1.45208	0.296258	0.401365	0.0721509	0.246179	0.211823	0.400413
1.54889	0.370543	0.436023	0.120247	0.212469	0.340425	0.568007		1.54889	0.321065	0.404316	0.0673587	0.203105	0.247448	0.509442
1.64569	0.397278	0.418226	0.124329	0.237782	0.360038	0.58879		1.64569	0.339746	0.423989	0.0677667	0.211551	0.27478	0.565213
1.7425	0.379784	0.416267	0.108227	0.238679	0.35117	0.591047		1.7425	0.344575	0.400178	0.0782912	0.196951	0.263038	0.57725
1.8393	0.367702	0.465587	0.181015	0.239563	0.345311	0.621845		1.8393	0.398754	0.434289	0.0764725	0.219751	0.254944	0.524695
1.93611	0.354826	0.426991	0.137564	0.243943	0.326552	0.640701		1.93611	0.344248	0.42553	0.0955843	0.21218	0.238509	0.509893
2.03291	0.417335	0.447234	0.103411	0.239341	0.368611	0.769384		2.03291	0.331613	0.418209	0.0796929	0.174385	0.281236	0.54737
2.12972	0.403671	0.42508	0.096081	0.256411	0.356159	0.655925		2.12972	0.327933	0.424716	0.100651	0.196436	0.279446	0.568967
2.22652	0.450688	0.447838	0.123102	0.24394	0.357233	0.613478		2.22652	0.320482	0.468428	0.0985142	0.23476	0.212829	0.522327
2.32333	0.429555	0.479579	0.135581	0.246354	0.369058	0.884856		2.32333	0.310159	0.460596	0.10258	0.22853	0.317891	0.536363
2.42014	0.433649	0.482716	0.128625	0.244111	0.362199	0.675781		2.42014	0.368755	0.453058	0.0834835	0.225787	0.281709	0.546091
2.51694	0.414472	0.482357	0.065711	0.217511	0.373506	0.714621		2.51694	0.318859	0.44716	0.068497	0.176965	0.261821	0.55618
2.61375	0.45363	0.470283	0.0859811	0.24941	0.391622	0.768168		2.61375	0.347217	0.452264	0.0921471	0.226949	0.263645	0.523739
2.71055	0.374912	0.476274	0.143353	0.24907	0.412438	0.727442		2.71055	0.352044	0.499135	0.103046	0.212103	0.264083	0.572477
2.80736	0.407198	0.524885	0.0581351	0.245014	0.395904	0.666146		2.80736	0.376745	0.448312	0.0871331	0.19679	0.242529	0.529122
2.90416	0.402107	0.487681	0.128582	0.272806	0.375524	0.662837		2.90416	0.408944	0.424501	0.0892223	0.22988	0.274344	0.519753
3.00097	0.412593	0.579904	0.134319	0.255807	0.355697	0.81763		3.00097	0.41198	0.477339	0.0938537	0.212242	0.261818	0.524828
3.09777	0.406535	0.556284	0.102463	0.273682	0.37549	0.568265		3.09777	0.410313	0.507198	0.0824914	0.196088	0.259399	0.538922
3.19458	0.417644	0.545292	0.147668	0.234584	0.346775	0.653359		3.19458	0.416717	0.478023	0.13392	0.206699	0.262022	0.543306
3.29138	0.410283	0.614441	0.141244	0.238666	0.382873	0.648947		3.29138	0.387408	0.477561	0.124351	0.25181	0.311179	0.48998
3.38819	0.419275	0.543687	0.127847	0.245595	0.385828	0.676652		3.38819	0.411765	0.455392	0.154824	0.191202	0.258343	0.393079
3.485	0.426877	0.584152	0.071635	0.24762	0.359012	0.656936		3.485	0.41762	0.445248	0.0990801	0.187047	0.281015	0.434831
3.5818	0.425834	0.525175	0.172836	0.240106	0.34094	0.703456		3.5818	0.416207	0.486696	0.108859	0.206487	0.260482	0.54119
3.67861	0.432033	0.534406	0.124788	0.241725	0.38305	0.688119		3.67861	0.477177	0.452231	0.136484	0.187737	0.241825	0.487586
3.77541	0.424709	0.52754	0.120372	0.246186	0.350002	0.642021		3.77541	0.450224	0.463289	0.0889941	0.165955	0.260435	0.521497
3.87222	0.433846	0.499656	0.182237	0.282275	0.400327	0.789744		3.87222	0.454493	0.464358	0.128026	0.213405	0.238869	0.467367
3.96902	0.419303	0.512133	0.13317	0.261466	0.418217	0.796738		3.96902	0.424928	0.456706	0.147038	0.204076	0.30276	0.463384
4.06583	0.439495	0.535274	0.144637	0.27618	0.383436	0.571678		4.06583	0.454448	0.462614	0.134002	0.226995	0.246757	0.500041
4.16263	0.439481	0.529912	0.133104	0.24895	0.411175	0.718652		4.16263	0.441999	0.448541	0.0961746	0.20743	0.267871	0.512056
4.25944	0.453602	0.532483	0.187904	0.268414	0.391737	0.698224		4.25944	0.464262	0.431214	0.18225	0.213762	0.272658	0.505411
4.35624	0.422865	0.439586	0.16224	0.299874	0.391544	0.732848		4.35624	0.456804	0.46476	0.19704	0.213032	0.273399	0.543673
4.45305	0.44774	0.4622	0.216451	0.272074	0.389655	0.751302		4.45305	0.434825	0.453526	0.185579	0.204988	0.26293	0.595633
4.54985	0.437421	0.488175	0.166405	0.298821	0.415722	0.638206		4.54985	0.459505	0.464013	0.19575	0.231007	0.27336	0.578666
4.64666	0.428718	0.47381	0.287766	0.284185	0.419931	0.724042		4.64666	0.507247	0.434105	0.201307	0.24131	0.286232	0.542441
4.74347	0.423889	0.4785	0.28603	0.282558	0.394533	0.550936		4.74347	0.418696	0.455546	0.233558	0.208043	0.232277	0.582164
4.84027	0.370086	0.460836	0.24696	0.321484	0.38173	0.697157		4.84027	0.482751	0.452404	0.203741	0.217164	0.298813	0.529817
4.93708	0.417223	0.460824	0.262902	0.32193	0.422582	0.664394		4.93708	0.418849	0.427682	0.229964	0.263081	0.274266	0.562882
5.03388	0.456334	0.467802	0.344931	0.325919	0.400376	0.732306		5.03388	0.492494	0.443223	0.232654	0.249554	0.289004	0.498977
5.13069	0.549473	0.516957	0.399027	0.317172	0.371886	0.702679		5.13069	0.43767	0.454092	0.25275	0.247993	0.267305	0.465398
5.22749	0.541565	0.494538	0.435821	0.359509	0.407099	0.779333		5.22749	0.448762	0.460309	0.254988	0.198972	0.225008	0.381994
5.3243	0.535254	0.491349	0.479886	0.302773	0.371308	0.723916		5.3243	0.404207	0.464425	0.277321	0.233689	0.252603	0.441478
5.4211	0.568389	0.510903	0.535684	0.338292	0.367622	0.821486		5.4211	0.410701	0.476563	0.293326	0.190129	0.26325	0.385857
5.51791	0.512615	0.451939	0.54746	0.304922	0.363442	0.679878		5.51791	0.434884	0.472695	0.287162	0.188682	0.286195	0.44319
5.61471	0.578209	0.444836	0.647784	0.301678	0.398374	0.615339		5.61471	0.436233	0.503105	0.295498	0.257471	0.251536	0.397312
5.71152	0.592749	0.479601	0.606138	0.269021	0.368732	0.72503		5.71152	0.410647	0.48597	0.300359	0.210735	0.2902	0.425294
5.80833	0.554131	0.439955	0.540792	0.296245	0.371221	0.494566		5.80833	0.41178	0.488254	0.326337	0.229806	0.28237	0.429226
5.90513	0.615427	0.485301	0.738871	0.308097	0.362183	0.544354		5.90513	0.359633	0.473674	0.304547	0.23845	0.260435	0.392393
6.00194	0.560203	0.468286	0.63616	0.291461	0.351677	0.492314		6.00194	0.405748	0.421395	0.31031	0.214726	0.279194	0.495123
6.09874	0.592578	0.492457	0.689574	0.284953	0.337959	0.630145		6.09874	0.407287	0.444451	0.301413	0.232234	0.267432	0.558333
6.19555	0.560223	0.503971	0.659806	0.25003	0.347153	0.470343		6.19555	0.394543	0.42343	0.301793	0.24885	0.25125	0.479221
6.29235	0.614138	0.550504	0.738599	0.25954	0.348316	0.517376		6.29235	0.405082	0.421146	0.300962	0.223694	0.279225	0.437471
6.38916	0.595096	0.55635	0.540408	0.239073	0.337271	0.482365		6.38916	0.357693	0.455067	0.324239	0.237097	0.266564	0.425439
6.48596	0.630353	0.596372	0.598923	0.259918	0.3387	0.446425		6.48596	0.392511	0.499226	0.270518	0.213026	0.278814	0.414541
6.58277	0.573971	0.61316	0.59299	0.23809	0.3276	0.536614		6.58277	0.394367	0.477522	0.26863	0.246058	0.256487	0.388775
6.67957	0.58421	0.5608	0.784617	0.228259	0.322553	0.558906		6.67957	0.352902	0.471662	0.332056	0.234488	0.216655	0.418597
6.77638	0.582195	0.574903	0.758626	0.243334	0.344	0.602077		6.77638	0.38433	0.494235	0.240056	0.25177	0.270402	0.409344
6.87318	0.59056	0.50723	0.701115	0.259354	0.35296	0.470016		6.87318	0.306563	0.494776	0.266146	0.275366	0.272128	0.470041
6.96999	0.605511	0.521979	0.85238	0.221378	0.348775	0.539739		6.96999	0.354193	0.462719	0.258186	0.231242	0.242766	0.413898
7.0668	0.56275	0.512456	0.655357	0.246532	0.34643	0.399464		7.0668	0.369005	0.482032	0.278801	0.285367	0.243042	0.430058
7.1636	0.572147	0.514385	0.884249	0.221239	0.329209	0.49357		7.1636	0.413179	0.44792	0.335369	0.263135	0.260459	0.43022
7.26041	0.532914	0.562925	0.860773	0.214795	0.330569	0.566414		7.26041	0.414114	0.495318	0.296702	0.228932	0.250145	0.366315
7.35721	0.539253	0.595074	0.883484	0.236906	0.325867	0.506573		7.35721	0.383211	0.479793	0.290176	0.210037	0.278353	0.413897
7.45402	0.510708	0.584854	0.84666	0.213708	0.343646	0.431548		7.45402	0.375679	0.463117	0.290814	0.215361	0.263482	0.436414
7.55082	0.530736	0.573408	1.02909	0.229957	0.309707	0.568352		7.55082	0.341948	0.46477	0.295357	0.16934	0.254136	0.415095
7.64763	0.541085	0.548575	0.876103	0.216064	0.31537	0.520738		7.64763	0.316621	0.446834	0.271106	0.23624	0.253243	0.431346
7.74443	0.508654	0.51456	0.830617	0.205054	0.309788	0.542022		7.74443	0.331553	0.478534	0.264869	0.224855	0.27021	0.380592
7.84124	0.536693	0.510884	0.757791	0.218613	0.317354	0.550295		7.84124	0.312199	0.44878	0.23413	0.186726	0.234735	0.409566
7.93804	0.556512	0.473937	0.81242	0.216223	0.291881	0.460636		7.93804	0.309703	0.491403	0.291593	0.178148	0.242761	0.351114
8.03485	0.53016	0.4967	0.886329	0.213612	0.312421	0.508198		8.03485	0.335105	0.50501	0.264507	0.225367	0.245384	0.40976
8.13166	0.481895	0.4861	0.700522	0.229326	0.320465	0.336655		8.13166	0.330868	0.478584	0.241516	0.215061	0.220524	0.343367

## Sheet: 2ci
Figure 2 ci
	LC reward bin mean F																											LC no reward bin mean F
bin	1	2	3	4	5	6	7	8	9	10	11	12	13	14	15	16	17	18	19	20	21	22	23	24	25	26		1	2	3	4	5	6	7	8	9	10	11	12	13	14	15	16	17	18	19	20	21	22
1	0.328924	0.147835	0.297255	0.466711	0.404957	0.355473	0.369363	0.375821	0.372872	0.393775	0.393453	0.26422	0.359987	0.347678	0.368167	0.263891	0.18672	0.341496	0.380632	0.365306	0.422156	0.326106	0.383886	0.283182	0.40516	0.388628		0.383454	0.354403	0.413722	0.531885	0.390644	0.407536	0.397711	0.39804	0.407315	0.44726	0.377897	0.343059	0.379487	0.392254	0.379692	0.376682	0.491047	0.556754	0.462575	0.477064	0.45577	0.381938
2	0.368928	0.367221	0.372862	0.502373	0.608318	0.474457	0.457645	0.452421	0.481637	0.518875	0.519964	0.349788	0.435679	0.363223	0.441422	0.310237	0.336084	0.440055	0.401143	0.406797	0.416236	0.43236	0.349032	0.457857	0.550871	0.526993		0.477325	0.412908	0.438344	0.491647	0.452866	0.461593	0.509728	0.471188	0.523652	0.502498	0.448546	0.350208	0.484067	0.374307	0.413765	0.409357	0.477809	0.595988	0.533436	0.525862	0.479634	0.419328
3	0.392036	0.432095	0.395619	0.592223	0.570567	0.598684	0.564462	0.540879	0.562359	0.520826	0.489708	0.461335	0.469381	0.434042	0.482568	0.48967	0.422615	0.423117	0.391415	0.413774	0.40941	0.448698	0.34421	0.492525	0.458436	0.471867		0.419698	0.497108	0.449739	0.518612	0.554947	0.548629	0.465209	0.541932	0.46343	0.488999	0.485859	0.366202	0.427979	0.407371	0.472	0.414986	0.485416	0.553925	0.503612	0.491273	0.475712	0.389717
4	0.387259	0.494181	0.431211	0.526343	0.637034	0.614043	0.451696	0.624484	0.575457	0.533967	0.591679	0.492911	0.669466	0.386034	0.481561	0.350775	0.489596	0.452562	0.354221	0.439754	0.487287	0.472399	0.33414	0.463684	0.478393	0.453752		0.462093	0.553734	0.479109	0.396119	0.57933	0.598525	0.469918	0.493984	0.493644	0.542605	0.563107	0.346992	0.430075	0.372761	0.433159	0.374881	0.508469	0.608679	0.452066	0.470427	0.451318	0.398714
5	0.40559	0.545891	0.477725	0.495608	0.589709	0.600283	0.564553	0.523989	0.676884	0.61061	0.457163	0.509404	0.565758	0.522014	0.431917	0.409645	0.448654	0.415803	0.326382	0.459515	0.378524	0.425684	0.321349	0.489564	0.531673	0.518682		0.455446	0.551234	0.442895	0.371287	0.561997	0.534634	0.491422	0.376264	0.529598	0.575806	0.473249	0.353036	0.474971	0.383925	0.453854	0.424138	0.480284	0.572026	0.501283	0.455168	0.471149	0.407587
6	0.399571	0.549193	0.44037	0.577198	0.616376	0.625381	0.539344	0.662676	0.669584	0.582346	0.472192	0.533	0.58727	0.475874	0.488667	0.501275	0.528524	0.363724	0.381772	0.488115	0.400529	0.441538	0.345892	0.49029	0.531466	0.535029		0.444928	0.546961	0.418804	0.432273	0.534562	0.628366	0.471186	0.59747	0.513155	0.559346	0.470108	0.36095	0.498511	0.385531	0.454818	0.401458	0.504094	0.555744	0.414738	0.505818	0.43458	0.474672
7	0.411286	0.566902	0.527951	0.532516	0.556807	0.645915	0.568613	0.509594	0.601257	0.487885	0.382178	0.521576	0.632894	0.47185	0.454098	0.509833	0.543544	0.375537	0.316074	0.493523	0.410576	0.561214	0.393231	0.461765	0.592458	0.570678		0.396446	0.589514	0.462899	0.390851	0.718966	0.505249	0.569154	0.45025	0.538149	0.478505	0.554122	0.376283	0.411153	0.404389	0.380593	0.400981	0.537716	0.548926	0.439358	0.438389	0.352988	0.520587
8	0.446765	0.546303	0.523307	0.449159	0.576947	0.647343	0.568473	0.705212	0.643342	0.448633	0.618683	0.496934	0.517309	0.426218	0.39313	0.536894	0.4843	0.341481	0.321363	0.463385	0.518251	0.548076	0.414881	0.500115	0.467292	0.454574		0.439435	0.642021	0.48593	0.451873	0.583833	0.580841	0.548997	0.576757	0.478119	0.520879	0.409391	0.401337	0.486915	0.396376	0.391625	0.418832	0.5258	0.570697	0.415962	0.380758	0.443767	0.48513
9	0.425393	0.602046	0.491131	0.488458	0.744485	0.474705	0.479901	0.490992	0.463156	0.449614	0.458539	0.503868	0.609014	0.482768	0.388344	0.367628	0.581171	0.296127	0.330962	0.483205	0.441612	0.525953	0.392742	0.486737	0.481372	0.443764		0.440484	0.658054	0.525733	0.499528	0.587491	0.526464	0.554804	0.45559	0.624079	0.512369	0.506618	0.355484	0.486073	0.390137	0.436571	0.46212	0.515445	0.536374	0.445047	0.526995	0.400836	0.543126
10	0.444611	0.608553	0.472685	0.500037	0.596165	0.679926	0.464238	0.460004	0.727011	0.498556	0.634532	0.512405	0.570959	0.492692	0.395068	0.409446	0.613855	0.346759	0.361534	0.454271	0.395035	0.575169	0.479181	0.491862	0.459223	0.451201		0.426245	0.668627	0.49476	0.44628	0.541397	0.493516	0.629115	0.493525	0.526297	0.453093	0.47604	0.380853	0.540107	0.366397	0.526573	0.432712	0.562119	0.538441	0.419976	0.495671	0.422796	0.522837
11	0.445641	0.566102	0.413824	0.550114	0.690895	0.551698	0.512408	0.54786	0.494518	0.441695	0.749012	0.520534	0.566396	0.613375	0.413962	0.400374	0.544592	0.370535	0.325815	0.549867	0.376494	0.535665	0.490868	0.547608	0.510027	0.483824		0.446717	0.676834	0.539839	0.462847	0.565725	0.628165	0.564627	0.519173	0.437293	0.48932	0.638573	0.355364	0.473893	0.402191	0.518178	0.418335	0.536995	0.552642	0.408995	0.505432	0.43786	0.515459
12	0.450422	0.569683	0.453018	0.553957	0.66891	0.56204	0.590531	0.655725	0.427637	0.475252	0.623687	0.550176	0.491811	0.554125	0.475906	0.523525	0.662932	0.293209	0.340691	0.500043	0.412936	0.609039	0.583929	0.591567	0.565626	0.56343		0.420877	0.64538	0.545404	0.408733	0.56428	0.561245	0.523059	0.504247	0.530157	0.44837	0.583195	0.364531	0.484777	0.312279	0.558406	0.498569	0.571202	0.534218	0.413724	0.471447	0.433246	0.533918
13	0.416189	0.56802	0.494702	0.507324	0.630337	0.615734	0.494483	0.49134	0.52117	0.593383	0.499673	0.52542	0.67628	0.543518	0.381826	0.424987	0.607174	0.354922	0.353233	0.4509	0.44462	0.560803	0.593395	0.568265	0.516827	0.519518		0.412989	0.663623	0.554013	0.387503	0.576281	0.652654	0.517147	0.49421	0.565263	0.396446	0.54957	0.325336	0.443985	0.438081	0.488394	0.420637	0.547983	0.47475	0.410373	0.609899	0.398215	0.540446
14	0.408377	0.583571	0.455369	0.443913	0.707166	0.580742	0.557004	0.679148	0.478207	0.564938	0.512084	0.469154	0.55586	0.46918	0.351874	0.415341	0.528881	0.375341	0.377021	0.449388	0.415419	0.529449	0.616843	0.551781	0.500941	0.487649		0.417783	0.679711	0.538236	0.394565	0.558584	0.634099	0.492411	0.501792	0.575459	0.46116	0.43001	0.389327	0.458451	0.365879	0.515305	0.403981	0.506677	0.488576	0.400157	0.495338	0.530398	0.524481
15	0.381286	0.549363	0.394198	0.433778	0.674466	0.575245	0.486619	0.491742	0.44872	0.471516	0.525956	0.479882	0.604541	0.386739	0.364893	0.414516	0.557747	0.335956	0.391449	0.374605	0.456252	0.526815	0.54201	0.502547	0.565464	0.54298		0.428251	0.646706	0.47421	0.524395	0.628119	0.453915	0.401399	0.424468	0.406665	0.577504	0.55934	0.376885	0.43494	0.421637	0.492673	0.331239	0.535462	0.496414	0.447104	0.527476	0.501873	0.579552
16	0.34335	0.506253	0.376443	0.509556	0.637557	0.622326	0.547543	0.602141	0.468748	0.595655	0.615905	0.456533	0.500843	0.515374	0.4258	0.463275	0.606071	0.35978	0.342075	0.56791	0.560504	0.576492	0.544418	0.506893	0.52696	0.526199		0.358457	0.57985	0.534898	0.454836	0.668467	0.534033	0.412724	0.426059	0.547852	0.500177	0.396284	0.356772	0.420549	0.384784	0.547928	0.427454	0.513418	0.487653	0.489532	0.573087	0.477329	0.632873
17	0.345703	0.503436	0.456101	0.53419	0.693802	0.588528	0.554063	0.574163	0.431231	0.398387	0.505104	0.4406	0.438423	0.494276	0.44095	0.467143	0.598523	0.328362	0.314248	0.427923	0.456574	0.559653	0.523295	0.469776	0.465309	0.4834		0.349878	0.593845	0.498033	0.452508	0.609513	0.612868	0.584877	0.514769	0.462655	0.568482	0.454773	0.362121	0.419954	0.451697	0.515344	0.425984	0.503534	0.406322	0.405912	0.549675	0.400395	0.636205
18	0.340286	0.53489	0.399522	0.471882	0.680758	0.639297	0.525532	0.491858	0.534282	0.595515	0.572551	0.448215	0.564613	0.524115	0.446204	0.549848	0.645011	0.281776	0.288706	0.591806	0.477279	0.52687	0.477032	0.406087	0.410797	0.403557		0.376473	0.574976	0.455949	0.48491	0.60565	0.569179	0.575774	0.483492	0.526219	0.574218	0.476603	0.338876	0.455532	0.393211	0.479964	0.382361	0.53525	0.411759	0.352166	0.464283	0.371106	0.551134
19	0.332396	0.600137	0.425076	0.509491	0.699413	0.605676	0.542326	0.597349	0.55532	0.45287	0.507714	0.432329	0.634999	0.534795	0.478384	0.641235	0.639689	0.317918	0.2818	0.505063	0.39897	0.520313	0.505819	0.404254	0.487517	0.460198		0.378238	0.6217	0.426545	0.565996	0.592475	0.562882	0.50504	0.496991	0.460081	0.437556	0.477336	0.323269	0.547733	0.408031	0.571676	0.485743	0.529665	0.414824	0.379947	0.442	0.466518	0.586867
20	0.360569	0.648165	0.457335	0.51005	0.69578	0.638992	0.632248	0.61494	0.510344	0.563844	0.572317	0.498612	0.473505	0.565431	0.451667	0.506264	0.694375	0.334436	0.291077	0.412805	0.383348	0.505245	0.482225	0.464395	0.448393	0.438457		0.409551	0.706168	0.507471	0.408569	0.569674	0.560417	0.489032	0.471096	0.491552	0.530524	0.47117	0.344096	0.560363	0.463401	0.583959	0.472703	0.622074	0.384773	0.41444	0.438687	0.425018	0.5854
21	0.383202	0.668983	0.519384	0.465849	0.744492	0.666387	0.550539	0.511947	0.582404	0.541247	0.490004	0.474207	0.628676	0.610945	0.41973	0.519989	0.697999	0.325137	0.24294	0.421976	0.457145	0.55642	0.478818	0.465543	0.389742	0.383802		0.448129	0.733378	0.641041	0.449111	0.520386	0.528378	0.516114	0.529924	0.542732	0.468793	0.487474	0.324512	0.540426	0.394561	0.544627	0.488032	0.634398	0.435394	0.407052	0.445021	0.492423	0.536352
22	0.40552	0.692742	0.560185	0.494566	0.711352	0.604605	0.764214	0.539489	0.50069	0.514545	0.471037	0.526927	0.504491	0.515779	0.42259	0.636737	0.659923	0.380178	0.301137	0.484863	0.448998	0.51501	0.476175	0.55727	0.41379	0.407043		0.394386	0.718917	0.614357	0.484752	0.491339	0.521441	0.587017	0.522943	0.472762	0.484081	0.5147	0.388705	0.591334	0.349981	0.564384	0.537773	0.673178	0.484391	0.393907	0.490132	0.415387	0.552011
23	0.329711	0.708267	0.585253	0.548878	0.696437	0.692059	0.583331	0.744287	0.549896	0.539613	0.631446	0.485074	0.465372	0.537337	0.414205	0.534741	0.641552	0.40089	0.223947	0.461997	0.411724	0.474085	0.541505	0.530775	0.398263	0.376116		0.407537	0.672916	0.584725	0.509244	0.618559	0.570684	0.512709	0.455489	0.476691	0.429876	0.480182	0.430485	0.529169	0.408814	0.513553	0.545744	0.689934	0.563945	0.375805	0.516063	0.465533	0.597586
24	0.444065	0.639734	0.555685	0.510225	0.710829	0.476772	0.685456	0.566271	0.501048	0.542757	0.646915	0.543969	0.548878	0.64306	0.441943	0.694338	0.629377	0.395856	0.320828	0.518052	0.382592	0.46171	0.495437	0.557741	0.360669	0.341899		0.468019	0.749979	0.5811	0.434991	0.628881	0.515933	0.44059	0.512217	0.659021	0.615253	0.562653	0.381621	0.458015	0.407012	0.537667	0.471457	0.676453	0.557624	0.369966	0.471914	0.393498	0.650966
25	0.369895	0.64396	0.589578	0.486378	0.634429	0.704581	0.800058	0.468317	0.452352	0.520953	0.442817	0.49591	0.602866	0.740835	0.447143	0.450445	0.661078	0.363242	0.315375	0.544697	0.410639	0.487025	0.558313	0.487613	0.320997	0.308009		0.420841	0.705713	0.685646	0.454802	0.615332	0.48323	0.577872	0.571346	0.603659	0.458314	0.428722	0.375482	0.498655	0.342713	0.49849	0.543139	0.673989	0.579586	0.382422	0.461329	0.452741	0.672833
26	0.451006	0.69739	0.498461	0.548226	0.576403	0.601251	0.610687	0.489744	0.480322	0.377379	0.649559	0.591964	0.734519	0.480733	0.357658	0.516565	0.702477	0.355528	0.307943	0.474317	0.467996	0.555242	0.556677	0.497373	0.349803	0.336713		0.439239	0.829769	0.560928	0.44143	0.588125	0.438989	0.497261	0.41406	0.513936	0.516006	0.555427	0.358361	0.519555	0.410583	0.478552	0.509603	0.764117	0.57554	0.401017	0.561353	0.479223	0.583828
27	0.399114	0.604678	0.544537	0.511462	0.669668	0.671823	0.671874	0.566869	0.599612	0.524413	0.699558	0.554282	0.441862	0.505499	0.427393	0.531081	0.72687	0.441974	0.300719	0.427828	0.401673	0.595084	0.507537	0.488249	0.428342	0.426084		0.456772	0.684073	0.699092	0.44016	0.523447	0.486914	0.561554	0.488548	0.508643	0.475731	0.428807	0.408912	0.515409	0.424958	0.473027	0.655346	0.721315	0.591598	0.362062	0.492307	0.429882	0.605898
28	0.444752	0.720404	0.485511	0.568329	0.615878	0.621941	0.643411	0.502814	0.558802	0.363416	0.553911	0.384235	0.547264	0.556717	0.463618	0.472723	0.682432	0.444189	0.291691	0.451695	0.463982	0.579083	0.601265	0.519503	0.443977	0.435119		0.429259	0.808303	0.622032	0.426467	0.507177	0.606141	0.423365	0.510154	0.57214	0.540408	0.588609	0.393546	0.566107	0.498875	0.416916	0.548636	0.748691	0.566339	0.367341	0.453441	0.486626	0.624137
29	0.522475	0.650325	0.531798	0.60656	0.600991	0.634585	0.725948	0.550986	0.514709	0.529709	0.596711	0.568968	0.667479	0.420196	0.393856	0.714766	0.706986	0.433105	0.331332	0.446845	0.504886	0.52516	0.615338	0.504079	0.482675	0.463535		0.405825	0.720417	0.529619	0.453874	0.554203	0.544616	0.552894	0.626571	0.417621	0.505449	0.436269	0.456347	0.431172	0.449236	0.533065	0.600138	0.73366	0.62749	0.38307	0.520632	0.514216	0.611308
30	0.347941	0.703218	0.468631	0.520078	0.695539	0.600147	0.73963	0.587527	0.552556	0.747493	0.58533	0.509432	0.424268	0.422231	0.410935	0.60936	0.764879	0.480616	0.32789	0.529668	0.453525	0.525739	0.525453	0.49492	0.405681	0.362866		0.507694	0.826048	0.583656	0.498332	0.550558	0.623708	0.457386	0.577542	0.487306	0.477229	0.508112	0.3222	0.527019	0.462442	0.454992	0.519599	0.706919	0.596337	0.369885	0.52258	0.49582	0.575809
31	0.509193	0.665249	0.489269	0.461649	0.741011	0.602388	0.747531	0.529931	0.530734	0.500072	0.516363	0.501879	0.577483	0.659195	0.410606	0.60036	0.704623	0.492001	0.295476	0.457063	0.520913	0.545377	0.480349	0.493733	0.444629	0.421668		0.440287	0.772092	0.55449	0.462898	0.589061	0.461994	0.451451	0.490896	0.490985	0.406208	0.506653	0.46473	0.510001	0.341146	0.484011	0.519988	0.69122	0.554841	0.375382	0.514403	0.424828	0.547483
32	0.461313	0.649519	0.486723	0.516393	0.782992	0.624822	0.648668	0.639273	0.488946	0.607137	0.623068	0.539525	0.573666	0.508073	0.456052	0.595218	0.727706	0.394245	0.323217	0.427382	0.491152	0.48738	0.515722	0.461449	0.420515	0.40664		0.407227	0.83929	0.607281	0.532779	0.592663	0.499236	0.476525	0.538698	0.413672	0.433572	0.632089	0.334277	0.634236	0.427073	0.447035	0.59239	0.727422	0.501736	0.343821	0.452415	0.474478	0.549971
33	0.417728	0.606567	0.398592	0.483211	0.845644	0.625908	0.474381	0.575304	0.425553	0.629294	0.596582	0.554926	0.604075	0.483653	0.401739	0.66104	0.570193	0.417504	0.356416	0.545632	0.455753	0.493643	0.433401	0.470254	0.476794	0.476497		0.459162	0.766925	0.564015	0.497682	0.632911	0.549322	0.469454	0.433389	0.456502	0.502289	0.522399	0.43704	0.495693	0.467148	0.461801	0.484781	0.732607	0.492539	0.375355	0.448777	0.481335	0.571117
34	0.42553	0.623106	0.455351	0.496327	0.913138	0.664251	0.58354	0.79217	0.475116	0.636612	0.432836	0.525414	0.555482	0.647439	0.467734	0.443258	0.71079	0.461242	0.291091	0.52028	0.423191	0.515629	0.413689	0.466506	0.542457	0.532499		0.404541	0.73556	0.553172	0.492415	0.558259	0.442507	0.490421	0.550882	0.530794	0.397883	0.428724	0.351032	0.476669	0.435848	0.429127	0.498469	0.671571	0.458898	0.353844	0.429563	0.452966	0.594115
35	0.388954	0.648017	0.46525	0.469959	0.702548	0.665043	0.697814	0.47083	0.477894	0.564872	0.512192	0.509737	0.679426	0.624385	0.421369	0.485014	0.668582	0.474582	0.309869	0.509466	0.420558	0.527708	0.513483	0.406571	0.475691	0.468814		0.462716	0.776184	0.730081	0.497422	0.553852	0.473852	0.441218	0.407897	0.529996	0.535075	0.41437	0.425235	0.415484	0.399911	0.510255	0.448638	0.690221	0.471924	0.414248	0.412935	0.474299	0.557104
36	0.33264	0.648232	0.486935	0.448959	0.646627	0.715549	0.661291	0.500852	0.519651	0.536166	0.626382	0.606983	0.588537	0.540365	0.38248	0.467463	0.587042	0.402593	0.363034	0.454626	0.410733	0.512497	0.523717	0.387558	0.415718	0.374941		0.426057	0.747901	0.680074	0.484689	0.60727	0.583948	0.613216	0.596525	0.523229	0.459196	0.369075	0.35003	0.625235	0.40201	0.505473	0.498442	0.655699	0.47801	0.381236	0.460823	0.443083	0.590256
37	0.350173	0.644001	0.472017	0.512227	0.767894	0.504527	0.488334	0.583342	0.745596	0.54639	0.564172	0.524493	0.525927	0.498568	0.368965	0.495708	0.637708	0.44756	0.313819	0.577065	0.427788	0.525048	0.519709	0.437813	0.523252	0.495869		0.40792	0.713729	0.653977	0.439084	0.494956	0.509837	0.594803	0.501338	0.488958	0.454421	0.412227	0.392716	0.490655	0.519734	0.49003	0.450806	0.753509	0.496731	0.319728	0.517323	0.504596	0.505013
38	0.383722	0.608539	0.496255	0.488761	0.565425	0.521665	0.59923	0.58217	0.38587	0.465276	0.472524	0.486199	0.550458	0.551864	0.345143	0.511557	0.630283	0.439238	0.278204	0.545902	0.363475	0.491519	0.481337	0.45728	0.498754	0.464421		0.439688	0.716438	0.679965	0.509889	0.641255	0.578769	0.543821	0.530627	0.608203	0.44734	0.474664	0.31872	0.458403	0.436907	0.449152	0.537596	0.690385	0.40202	0.355081	0.432377	0.428617	0.510422
39	0.385583	0.589123	0.548423	0.481477	0.69929	0.633014	0.707942	0.704692	0.495323	0.721998	0.461257	0.470952	0.481249	0.551466	0.369244	0.528051	0.531657	0.393919	0.346974	0.470343	0.478255	0.512405	0.473957	0.429727	0.500704	0.501787		0.434279	0.692744	0.622935	0.515291	0.478904	0.595148	0.519633	0.477293	0.438497	0.540184	0.519509	0.380036	0.521752	0.432581	0.493049	0.496539	0.679245	0.393737	0.319542	0.485207	0.406188	0.546371
40	0.381321	0.548891	0.449807	0.466161	0.657747	0.800412	0.645155	0.618843	0.508096	0.631254	0.425493	0.458895	0.554029	0.480001	0.376969	0.538482	0.582045	0.398676	0.293801	0.527271	0.450279	0.511841	0.488261	0.392706	0.498072	0.492145		0.459881	0.637969	0.516323	0.419974	0.549349	0.56885	0.457271	0.555106	0.553092	0.581836	0.303485	0.363564	0.529873	0.377413	0.449598	0.528063	0.620554	0.404776	0.337134	0.533219	0.384904	0.49617
41	0.334807	0.542702	0.496938	0.397767	0.808221	0.738149	0.712044	0.697287	0.633327	0.549038	0.385547	0.460616	0.536396	0.582588	0.428631	0.489702	0.571319	0.35262	0.30246	0.501845	0.413604	0.461768	0.490919	0.434282	0.413696	0.388442		0.435335	0.58958	0.512626	0.531498	0.613619	0.498882	0.527566	0.528738	0.502717	0.405766	0.443217	0.362012	0.54105	0.373906	0.404836	0.482259	0.665259	0.39101	0.391458	0.460343	0.417049	0.46668
42	0.348488	0.561133	0.450108	0.505753	0.48505	0.645667	0.624521	0.524805	0.418836	0.470428	0.577192	0.472793	0.613304	0.622951	0.448908	0.618935	0.533429	0.385224	0.315072	0.53368	0.347919	0.477752	0.372265	0.414641	0.476545	0.437992		0.404453	0.647107	0.529773	0.474644	0.512977	0.494676	0.411295	0.59941	0.510472	0.514777	0.379082	0.369228	0.506065	0.422093	0.399798	0.430355	0.635338	0.386207	0.364012	0.507818	0.457008	0.412076
43	0.361793	0.583086	0.437313	0.506831	0.613032	0.757555	0.676764	0.727441	0.357522	0.399315	0.562989	0.482724	0.477971	0.453845	0.405885	0.523056	0.651859	0.391302	0.302376	0.477305	0.472505	0.430161	0.383147	0.4415	0.424186	0.410878		0.418979	0.692192	0.534339	0.417399	0.547227	0.47698	0.479804	0.430296	0.480385	0.521841	0.442883	0.371599	0.432829	0.380673	0.399853	0.416105	0.62932	0.409619	0.393126	0.550259	0.380456	0.384922
44	0.364886	0.545881	0.42137	0.493043	0.597944	0.687795	0.566335	0.502501	0.475679	0.537132	0.596156	0.458392	0.550878	0.504905	0.446341	0.55087	0.599664	0.296579	0.35487	0.492161	0.441363	0.440134	0.438998	0.427999	0.369931	0.355596		0.438439	0.699311	0.546096	0.501055	0.543822	0.356326	0.317455	0.448223	0.429735	0.530561	0.40123	0.376	0.487792	0.409302	0.388883	0.495485	0.618602	0.396366	0.355213	0.544322	0.484305	0.396576
45	0.368115	0.56088	0.459531	0.559787	0.641953	0.766549	0.606245	0.637995	0.482985	0.426334	0.611917	0.49203	0.590037	0.597404	0.444395	0.554602	0.583971	0.302176	0.323304	0.475444	0.428401	0.459444	0.461811	0.457715	0.388981	0.3954		0.489156	0.730608	0.52157	0.562856	0.502577	0.554118	0.373911	0.368021	0.496463	0.493497	0.443259	0.35964	0.459861	0.481868	0.40167	0.419817	0.689164	0.436219	0.34431	0.424497	0.375782	0.332472
46	0.39485	0.584251	0.378313	0.517431	0.747462	0.657445	0.704141	0.679458	0.466214	0.609043	0.383024	0.487558	0.572789	0.638469	0.442155	0.658522	0.568541	0.305226	0.290774	0.558701	0.494028	0.472451	0.406151	0.402918	0.471001	0.465656		0.476252	0.744508	0.601769	0.516377	0.55451	0.515682	0.465461	0.526891	0.421838	0.546266	0.419895	0.415437	0.477012	0.400857	0.429313	0.5922	0.683492	0.465789	0.375946	0.392594	0.422338	0.418065
47	0.336212	0.593843	0.475863	0.51467	0.577909	0.816042	0.697583	0.635447	0.651305	0.365291	0.484929	0.491918	0.766923	0.618282	0.306002	0.569101	0.571236	0.377106	0.313442	0.445879	0.451383	0.394306	0.373771	0.389868	0.492177	0.476202		0.430433	0.785544	0.555242	0.511654	0.417233	0.497062	0.466444	0.55577	0.396	0.367337	0.358541	0.377198	0.519234	0.310802	0.329222	0.485826	0.629551	0.469538	0.38462	0.485686	0.43869	0.418186
48	0.386033	0.651595	0.464123	0.441204	0.612314	0.539691	0.72402	0.744184	0.759189	0.633795	0.583287	0.451224	0.462836	0.498101	0.42908	0.534955	0.634886	0.355037	0.370284	0.42043	0.385171	0.427943	0.395627	0.374057	0.420669	0.430967		0.468484	0.744253	0.608179	0.420803	0.47116	0.539557	0.454434	0.430072	0.462053	0.450729	0.577478	0.415498	0.510236	0.50936	0.270228	0.477907	0.707738	0.50394	0.394264	0.523551	0.380227	0.38915
49	0.358946	0.627846	0.445004	0.390812	0.588453	0.793367	0.638675	0.694688	0.692274	0.389791	0.590393	0.550226	0.416179	0.646444	0.399856	0.591036	0.615627	0.345849	0.358123	0.477949	0.390734	0.480401	0.379721	0.40951	0.369933	0.369224		0.451661	0.796262	0.558526	0.515704	0.517683	0.487574	0.377805	0.480091	0.380346	0.597262	0.477228	0.459789	0.533297	0.553553	0.347778	0.541323	0.664936	0.432685	0.375919	0.454134	0.379563	0.424482
50	0.399884	0.619137	0.516839	0.428885	0.633571	0.659339	0.865149	0.490424	0.465368	0.479865	0.480222	0.516266	0.565443	0.619576	0.402856	0.471031	0.599324	0.385772	0.373193	0.509687	0.450741	0.443656	0.346836	0.439869	0.399637	0.411039		0.38942	0.7079	0.496302	0.468666	0.586045	0.521373	0.46365	0.55024	0.522778	0.502891	0.445721	0.400623	0.525422	0.484295	0.366257	0.445946	0.608221	0.412499	0.397969	0.516653	0.373933	0.403821
51	0.377538	0.577957	0.417701	0.545622	0.709371	0.691883	0.703049	0.722376	0.512161	0.453537	0.468874	0.498553	0.57725	0.675726	0.382198	0.410625	0.553489	0.364192	0.339788	0.424292	0.553312	0.361194	0.330741	0.419352	0.436259	0.422972		0.431959	0.741371	0.493282	0.464621	0.49744	0.553696	0.432446	0.423442	0.519951	0.501258	0.358484	0.389046	0.528576	0.396819	0.408162	0.490852	0.705746	0.441588	0.383354	0.482535	0.389264	0.401035
52	0.340701	0.628564	0.414515	0.46985	0.761842	0.855906	0.59577	0.593544	0.593131	0.597469	0.609773	0.518525	0.468543	0.449549	0.38468	0.492927	0.537771	0.344023	0.296625	0.467288	0.444176	0.365125	0.340551	0.398616	0.373138	0.36029		0.292247	0.692053	0.664987	0.483817	0.495967	0.555523	0.460695	0.486672	0.435013	0.448155	0.349538	0.476707	0.434642	0.482817	0.38831	0.503092	0.721265	0.429613	0.400501	0.480034	0.428906	0.302526
53	0.387959	0.61988	0.448871	0.506177	0.656764	0.653722	0.670858	0.589398	0.543276	0.671546	0.624001	0.501416	0.446099	0.539307	0.358094	0.464816	0.504234	0.338044	0.33439	0.486991	0.402983	0.300176	0.368626	0.364034	0.401768	0.382204		0.495528	0.628717	0.72147	0.46323	0.386432	0.582831	0.528586	0.471112	0.545594	0.504182	0.37865	0.432136	0.534202	0.444102	0.365617	0.410626	0.633328	0.473721	0.431783	0.474004	0.442986	0.351592
54	0.396273	0.564618	0.387675	0.464099	0.643221	0.574357	0.801737	0.686137	0.503752	0.463698	0.435021	0.461194	0.455456	0.653932	0.3627	0.466954	0.504838	0.320756	0.307	0.480993	0.339313	0.335131	0.357023	0.310704	0.428287	0.421856		0.368256	0.691883	0.649614	0.483017	0.407002	0.554555	0.461892	0.455571	0.525154	0.490789	0.464516	0.466871	0.448967	0.472366	0.354387	0.459331	0.61068	0.492767	0.392374	0.465215	0.439403	0.362314
55	0.359525	0.526345	0.464005	0.605477	0.639468	0.656632	0.617301	0.47277	0.592921	0.542324	0.345923	0.43929	0.308292	0.508802	0.38254	0.49109	0.46292	0.398668	0.345556	0.45305	0.331711	0.325692	0.294779	0.367904	0.379823	0.366583		0.338254	0.684252	0.574105	0.46047	0.505563	0.567225	0.461334	0.541557	0.453849	0.648576	0.434692	0.396223	0.422463	0.48039	0.370242	0.461145	0.664259	0.447743	0.374512	0.444867	0.443453	0.342014
56	0.376341	0.508347	0.56219	0.588064	0.578547	0.764996	0.581573	0.649014	0.557882	0.460496	0.300116	0.425475	0.428591	0.575413	0.43348	0.371007	0.501456	0.415445	0.330616	0.488416	0.418101	0.373906	0.374963	0.357852	0.396067	0.384557		0.472436	0.658904	0.573112	0.528836	0.452589	0.530442	0.476996	0.420749	0.491354	0.496106	0.375498	0.360152	0.4599	0.529822	0.386556	0.43199	0.594686	0.457381	0.344105	0.428113	0.372581	0.35255
57	0.359513	0.454757	0.532228	0.513919	0.504939	0.663833	0.575185	0.549573	0.644369	0.505867	0.418812	0.402537	0.384713	0.583153	0.464875	0.423066	0.445806	0.409119	0.283551	0.507976	0.482506	0.384784	0.340235	0.437355	0.35973	0.358368		0.388434	0.679922	0.548996	0.42694	0.470635	0.496227	0.473284	0.522712	0.491007	0.506247	0.417265	0.427816	0.471761	0.512094	0.422794	0.507848	0.594863	0.487545	0.400686	0.511496	0.403345	0.386367
58	0.379027	0.448307	0.408449	0.5112	0.498042	0.606303	0.48568	0.542362	0.587626	0.600784	0.373162	0.396021	0.464142	0.509357	0.483719	0.405497	0.420731	0.466301	0.326048	0.467366	0.442181	0.440019	0.34609	0.40033	0.447436	0.429272		0.469129	0.668041	0.514353	0.457916	0.432749	0.482059	0.374506	0.492399	0.49621	0.435612	0.326741	0.356122	0.48335	0.424479	0.371937	0.461432	0.593443	0.572223	0.355814	0.518741	0.463437	0.369668
59	0.401833	0.381626	0.383939	0.590907	0.539017	0.529705	0.487654	0.582011	0.59948	0.574781	0.463136	0.383347	0.37722	0.565073	0.474545	0.346553	0.392398	0.467916	0.375839	0.44881	0.509523	0.536529	0.372729	0.479474	0.419683	0.400026		0.45097	0.647888	0.516233	0.560832	0.405327	0.458276	0.37649	0.464131	0.389	0.46002	0.397018	0.342421	0.448928	0.405678	0.398307	0.41209	0.607509	0.656826	0.408462	0.508282	0.45977	0.477611
60	0.342267	0.28068	0.387664	0.55332	0.414674	0.491782	0.403272	0.441048	0.499944	0.517936	0.396014	0.371226	0.384744	0.430321	0.396396	0.314776	0.275055	0.45597	0.45014	0.436035	0.436311	0.504225	0.483842	0.437342	0.399816	0.387343		0.41424	0.480395	0.471352	0.52333	0.379741	0.362468	0.38325	0.403318	0.428519	0.406118	0.373689	0.346793	0.458773	0.421169	0.406069	0.414165	0.52716	0.690348	0.455096	0.536933	0.528268	0.524109
[truncated: 4 more columns]

## Sheet: 2cii
Figure 2 ci
	LC reward velocity binned F																											LC no reward bin mean F
bin	1	2	3	4	5	6	7	8	9	10	11	12	13	14	15	16	17	18	19	20	21	22	23	24	25	26		1	2	3	4	5	6	7	8	9	10	11	12	13	14	15	16	17	18	19	20	21	22
1	0.325942	0.155256	0.301006	0.414986	0.442965	0.349864	0.376049	0.362953	0.398325	0.391009	0.396271	0.314645	0.376176	0.375076	0.390722	0.253014	0.219474	0.323818	0.42606	0.365716	0.404093	0.346203	0.406575	0.307138	0.380753	0.365699		0.40032	0.273828	0.374046	0.357253	0.416177	0.299163	0.372624	0.357466	0.389506	0.393453	0.389886	0.30631	0.394383	0.40199	0.375274	0.322945	0.319651	0.382532	0.410496	0.41698	0.432021	0.352416
2	0.32535	0.167216	0.315378	0.398729	0.440901	0.343736	0.387513	0.360805	0.402334	0.423207	0.39985	0.309108	0.358497	0.380666	0.387884	0.272973	0.196169	0.362851	0.405695	0.374696	0.423133	0.390936	0.418815	0.325435	0.396206	0.379938		0.390988	0.280386	0.387881	0.424525	0.411735	0.347602	0.375565	0.363723	0.387468	0.397784	0.383163	0.313875	0.431416	0.341924	0.358453	0.362152	0.350311	0.390703	0.393066	0.433029	0.429074	0.35315
3	0.345796	0.169445	0.320582	0.389476	0.452302	0.330742	0.394659	0.377187	0.395034	0.407001	0.429229	0.299854	0.375604	0.344434	0.406797	0.262843	0.203768	0.376263	0.427233	0.359546	0.461875	0.433373	0.379643	0.383163	0.400054	0.386693		0.366617	0.296971	0.395421	0.377286	0.407164	0.295109	0.424788	0.35962	0.432147	0.417441	0.452989	0.29893	0.399931	0.388461	0.380999	0.343813	0.360072	0.474634	0.427414	0.445177	0.431632	0.393289
4	0.396593	0.256924	0.371237	0.440479	0.489558	0.372767	0.381769	0.427459	0.406831	0.419892	0.412494	0.296963	0.402901	0.376984	0.372996	0.282645	0.201689	0.441358	0.439773	0.4103	0.494305	0.482391	0.392279	0.449053	0.445724	0.436282		0.321985	0.368382	0.404692	0.443245	0.488248	0.376406	0.383571	0.308075	0.384261	0.341725	0.349237	0.279516	0.37134	0.393669	0.388747	0.329171	0.374896	0.508091	0.422842	0.452063	0.433416	0.383752
5	0.310518	0.274314	0.395158	0.414165	0.54756	0.444609	0.408917	0.417096	0.429154	0.435787	0.471535	0.286466	0.38011	0.332757	0.367621	0.261214	0.20863	0.346926	0.379414	0.402656	0.52967	0.597878	0.49797	0.481262	0.413783	0.398661		0.348281	0.369206	0.389385	0.429141	0.41001	0.398878	0.400135	0.378972	0.346904	0.442587	0.414822	0.303355	0.397749	0.383449	0.396587	0.293018	0.357563	0.512998	0.431879	0.471314	0.441348	0.460504
6	0.321733	0.310942	0.442854	0.429165	0.519098	0.407903	0.413503	0.451145	0.421597	0.489449	0.496271	0.310019	0.378154	0.373698	0.349395	0.261696	0.206147	0.30152	0.399879	0.40765	0.429488	0.401032	0.33887	0.395053	0.406923	0.38107		0.410412	0.378762	0.421635	0.444005	0.407711	0.511477	0.362945	0.382589	0.401288	0.446379	0.453374	0.321068	0.430692	0.387141	0.364024	0.30091	0.366899	0.539472	0.417754	0.485924	0.421157	0.383133
7	0.328632	0.334803	0.37606	0.490841	0.495151	0.458892	0.452981	0.511196	0.496355	0.532207	0.571828	0.353853	0.407253	0.376132	0.365132	0.276187	0.237822	0.362221	0.348878	0.454926	0.456219	0.481071	0.37499	0.44978	0.416608	0.402384		0.301792	0.343396	0.42006	0.374994	0.344936	0.407991	0.472237	0.453691	0.472002	0.511068	0.429842	0.287452	0.378056	0.39803	0.356779	0.323784	0.368942	0.513556	0.403887	0.45616	0.432468	0.390217
8	0.348674	0.355936	0.411126	0.469913	0.476128	0.444622	0.497004	0.414592	0.483555	0.471614	0.405289	0.371132	0.445102	0.314198	0.438518	0.34439	0.244383	0.420925	0.366441	0.408788	0.526968	0.477477	0.375565	0.488306	0.345646	0.337462		0.393339	0.435424	0.485977	0.422256	0.468965	0.454606	0.450494	0.423319	0.486468	0.44493	0.36861	0.278333	0.454348	0.453093	0.419925	0.336281	0.366149	0.541385	0.458117	0.476169	0.469248	0.423305
9	0.396322	0.411145	0.419268	0.510782	0.460541	0.497565	0.47324	0.489272	0.476056	0.416008	0.437049	0.361533	0.547097	0.357282	0.383208	0.297345	0.298654	0.423924	0.337384	0.448828	0.439798	0.376458	0.316454	0.405973	0.41296	0.380674		0.316764	0.416594	0.397367	0.378183	0.527732	0.411468	0.390556	0.50327	0.360113	0.403273	0.425249	0.369698	0.405801	0.367665	0.340732	0.348174	0.347058	0.531658	0.404464	0.51079	0.436289	0.44517
10	0.35733	0.434016	0.442039	0.489051	0.5572	0.543057	0.479215	0.55996	0.50198	0.550722	0.467997	0.402926	0.520716	0.386668	0.563697	0.361281	0.277074	0.387718	0.362788	0.427115	0.478406	0.428488	0.364914	0.487652	0.435956	0.407921		0.361027	0.426486	0.447078	0.442017	0.499049	0.428132	0.391237	0.429097	0.406181	0.382129	0.35165	0.33757	0.386713	0.43925	0.372149	0.355597	0.406799	0.497104	0.412911	0.48466	0.435947	0.43625
11	0.291148	0.424942	0.373888	0.51409	0.640368	0.64781	0.53495	0.476725	0.60718	0.544634	0.327203	0.397142	0.422448	0.58104	0.461501	0.373249	0.327754	0.377438	0.389749	0.398257	0.420785	0.489178	0.427562	0.438431	0.480537	0.473658		0.42993	0.5383	0.444483	0.453729	0.348441	0.392994	0.433106	0.414593	0.459997	0.469828	0.402839	0.381322	0.420852	0.333719	0.434632	0.362951	0.45481	0.538736	0.416493	0.457814	0.504308	0.388871
12	0.420513	0.464611	0.45047	0.56537	0.510822	0.580774	0.508583	0.575751	0.493996	0.55962	0.436487	0.379029	0.435292	0.461975	0.488119	0.47265	0.370327	0.412021	0.403053	0.491688	0.483439	0.479613	0.376636	0.428142	0.399762	0.397102		0.41885	0.49525	0.530175	0.426171	0.386116	0.387939	0.404385	0.468177	0.501625	0.520154	0.467805	0.305088	0.440956	0.410921	0.481611	0.402352	0.430607	0.493858	0.383367	0.479868	0.430196	0.401617
13	0.334919	0.470693	0.45905	0.59212	0.549557	0.637348	0.527259	0.600044	0.613753	0.5421	0.461858	0.395944	0.394718	0.566817	0.415443	0.359742	0.378427	0.397521	0.354874	0.495167	0.372669	0.409462	0.399709	0.449963	0.438272	0.454973		0.387736	0.491669	0.484586	0.43422	0.462975	0.514332	0.410498	0.573405	0.455279	0.507474	0.429818	0.334627	0.461159	0.387073	0.482683	0.369506	0.415568	0.53739	0.411149	0.504841	0.44473	0.422502
14	0.318693	0.454927	0.440042	0.548917	0.526975	0.510682	0.401635	0.540215	0.49903	0.54619	0.425233	0.408757	0.427453	0.378964	0.434964	0.389514	0.392228	0.387812	0.318959	0.491425	0.431046	0.484484	0.400563	0.320782	0.447292	0.425484		0.46004	0.560305	0.489867	0.486463	0.410297	0.448155	0.390652	0.509534	0.456327	0.509692	0.367437	0.278254	0.539871	0.382677	0.414589	0.3426	0.453893	0.512446	0.42024	0.479196	0.455992	0.429091
15	0.411837	0.484637	0.45066	0.541182	0.576831	0.526938	0.446169	0.563927	0.616344	0.502262	0.454055	0.417317	0.425764	0.482123	0.406361	0.276592	0.42342	0.36949	0.340489	0.491626	0.425136	0.326328	0.342829	0.328114	0.408403	0.398759		0.39745	0.522483	0.502709	0.501262	0.44769	0.545258	0.531911	0.548093	0.49719	0.529651	0.419325	0.362632	0.419074	0.371302	0.318461	0.389793	0.493881	0.501532	0.409078	0.48088	0.445282	0.429628
16	0.331404	0.437306	0.428783	0.565202	0.599016	0.634323	0.466687	0.510268	0.492459	0.497285	0.448572	0.406613	0.340014	0.514881	0.526251	0.44603	0.373163	0.356569	0.335552	0.490279	0.439798	0.388363	0.32969	0.406945	0.456332	0.445734		0.38789	0.512971	0.506148	0.430353	0.422339	0.503652	0.468452	0.524841	0.424424	0.434503	0.47001	0.316287	0.451902	0.403575	0.349249	0.354604	0.488104	0.495668	0.396401	0.489745	0.42527	0.403345
17	0.391498	0.498024	0.426227	0.528571	0.658347	0.757812	0.415338	0.578269	0.705748	0.424706	0.782767	0.424634	0.602564	0.468323	0.48099	0.327139	0.391304	0.353106	0.321415	0.46484	0.439338	0.404932	0.358151	0.459386	0.422061	0.418929		0.372224	0.568851	0.476282	0.476936	0.516788	0.492203	0.439758	0.545993	0.420062	0.540626	0.503408	0.336415	0.384998	0.467594	0.382422	0.463389	0.563646	0.497746	0.415078	0.462757	0.433844	0.431011
18	0.375483	0.433779	0.428645	0.51426	0.722809	0.661519	0.604664	0.629625	0.551866	0.544689	0.464347	0.350053	0.481023	0.504504	0.453571	0.389356	0.413806	0.387582	0.331951	0.495131	0.420479	0.388464	0.367709	0.41612	0.432786	0.421089		0.351767	0.599379	0.494035	0.51448	0.452697	0.483759	0.542213	0.491313	0.492418	0.417721	0.477685	0.397884	0.450791	0.420273	0.403493	0.370387	0.49846	0.505788	0.420211	0.486829	0.443231	0.471642
19	0.321004	0.510622	0.432877	0.526993	0.455966	0.651099	0.537101	0.4764	0.769698	0.462884	0.691466	0.407866	0.453991	0.479166	0.537229	0.3941	0.447419	0.387058	0.331652	0.511389	0.440751	0.353673	0.438111	0.387297	0.502761	0.502235		0.448596	0.559793	0.499422	0.499977	0.443226	0.486319	0.51496	0.545525	0.506494	0.570551	0.411568	0.325765	0.434052	0.365253	0.514759	0.393488	0.599478	0.495735	0.388158	0.493813	0.433473	0.438535
20	0.346107	0.513114	0.381576	0.489441	0.650319	0.596881	0.56913	0.453785	0.560555	0.548559	0.448114	0.423117	0.500601	0.455384	0.420179	0.36183	0.404099	0.391045	0.356696	0.475148	0.430473	0.348409	0.372507	0.351373	0.431546	0.435484		0.340626	0.580024	0.481561	0.518901	0.547138	0.44891	0.495087	0.387802	0.486863	0.416439	0.381108	0.332152	0.46147	0.409409	0.492775	0.418879	0.548322	0.486068	0.384996	0.522033	0.439214	0.44837
21	0.460647	0.511921	0.442405	0.537548	0.606858	0.554803	0.701278	0.529646	0.570791	0.511516	0.599022	0.46578	0.418325	0.585714	0.377189	0.411147	0.435615	0.320162	0.327744	0.47686	0.401825	0.40752	0.370425	0.393192	0.425286	0.41807		0.356937	0.5681	0.544659	0.513138	0.465875	0.408116	0.49359	0.418529	0.466855	0.482586	0.468388	0.311055	0.520963	0.410328	0.400509	0.435441	0.550855	0.504406	0.391841	0.500157	0.454971	0.488305
22	0.343663	0.47437	0.404635	0.467336	0.661738	0.654829	0.620399	0.567676	0.667734	0.465792	0.460347	0.445324	0.402669	0.456832	0.520529	0.378797	0.500822	0.357065	0.295909	0.424005	0.452346	0.545215	0.409019	0.388435	0.419494	0.408948		0.37845	0.59794	0.356859	0.425151	0.61487	0.510133	0.522983	0.42808	0.484698	0.574322	0.480819	0.343587	0.478414	0.391216	0.511894	0.368693	0.459988	0.532092	0.388486	0.52398	0.454106	0.487654
23	0.343597	0.462226	0.422259	0.526756	0.522095	0.56539	0.545631	0.303193	0.463717	0.700952	0.478929	0.453709	0.457278	0.529453	0.384261	0.405285	0.528993	0.375418	0.303607	0.466258	0.464967	0.459472	0.374298	0.420958	0.479185	0.471147		0.366792	0.653889	0.453734	0.443594	0.598841	0.497937	0.498699	0.419966	0.477259	0.421192	0.524335	0.369799	0.505707	0.52476	0.51177	0.441469	0.598367	0.537048	0.383953	0.464713	0.459303	0.462855
24	0.345786	0.511163	0.441904	0.542379	0.739373	0.790535	0.726294	0.615416	0.585182	0.6456	0.584043	0.452122	0.508751	0.550465	0.343306	0.407166	0.466537	0.383036	0.315302	0.462041	0.447507	0.435873	0.364813	0.439873	0.473161	0.467968		0.408614	0.540726	0.511691	0.497228	0.528244	0.676052	0.533566	0.486839	0.471095	0.514243	0.51308	0.33217	0.498907	0.411873	0.567481	0.383107	0.51965	0.515259	0.412639	0.477741	0.437571	0.518442
25	0.407545	0.512518	0.413695	0.47823	0.735753	0.750154	0.484057	0.608588	0.517374	0.521813	0.668432	0.506947	0.376556	0.525897	0.350817	0.445689	0.508964	0.332194	0.318195	0.512358	0.475089	0.452227	0.393214	0.442918	0.469412	0.45146		0.38557	0.650028	0.604771	0.542936	0.526263	0.547981	0.381085	0.449498	0.63598	0.517656	0.406507	0.32574	0.440138	0.446228	0.508853	0.443932	0.584007	0.508864	0.371556	0.557528	0.461368	0.515308
26	0.371464	0.483131	0.381622	0.475631	0.740673	0.467544	0.374182	0.489753	0.429413	0.545542	0.37196	0.504875	0.519486	0.571631	0.386959	0.364638	0.476736	0.36982	0.341924	0.476741	0.464446	0.474952	0.441488	0.468634	0.485195	0.456838		0.399535	0.618711	0.477584	0.494329	0.480149	0.496087	0.389132	0.574895	0.564778	0.350326	0.330236	0.353296	0.386665	0.404308	0.505631	0.557095	0.621531	0.517149	0.37886	0.525376	0.412899	0.555256
27	0.372784	0.482409	0.490914	0.55793	0.635859	0.545544	0.570056	0.650641	0.618961	0.522975	0.579465	0.524318	0.421983	0.615113	0.341025	0.552056	0.510446	0.393277	0.351938	0.502583	0.463662	0.442223	0.363123	0.475058	0.44383	0.423341		0.443253	0.643038	0.408784	0.458124	0.466646	0.542378	0.491469	0.547069	0.500096	0.442687	0.512573	0.359072	0.406909	0.38636	0.558761	0.431389	0.621228	0.444185	0.419135	0.542683	0.397334	0.547721
28	0.425033	0.540965	0.437874	0.462774	0.380162	0.599803	0.45701	0.415505	0.755928	0.608851	0.550617	0.415657	0.538459	0.556474	0.285984	0.531533	0.530609	0.451753	0.376556	0.533222	0.410091	0.490681	0.441879	0.483924	0.454098	0.433858		0.400654	0.594004	0.490155	0.423653	0.639813	0.61228	0.532155	0.489838	0.517122	0.463432	0.447986	0.337953	0.486179	0.355442	0.478958	0.412936	0.594864	0.496088	0.396296	0.462717	0.387795	0.536015
29	0.374919	0.546165	0.47317	0.499785	0.727919	0.636278	0.566809	0.729775	0.700914	0.626321	0.602941	0.500739	0.367417	0.486478	0.486398	0.398974	0.526192	0.416624	0.282862	0.525575	0.349736	0.450014	0.445752	0.421748	0.511538	0.501633		0.358601	0.548439	0.490695	0.49276	0.560448	0.550804	0.522164	0.427467	0.534252	0.467712	0.491134	0.344091	0.412434	0.419097	0.43529	0.484167	0.608964	0.529177	0.412293	0.483908	0.400014	0.524044
30	0.329415	0.495923	0.419489	0.518849	0.596662	0.669371	0.671156	0.56301	0.600954	0.401822	0.480774	0.49981	0.417816	0.493778	0.438163	0.430153	0.554887	0.425841	0.34155	0.529713	0.438622	0.490886	0.486552	0.47594	0.443245	0.429589		0.381936	0.653038	0.484557	0.48867	0.549504	0.631519	0.40876	0.553099	0.526317	0.54992	0.505783	0.334621	0.494363	0.542661	0.398167	0.472496	0.598301	0.459538	0.447349	0.479667	0.469672	0.551213
31	0.364744	0.512877	0.444512	0.456906	0.648949	0.456344	0.677461	0.577747	0.352619	0.660995	0.395507	0.48927	0.554451	0.520978	0.466437	0.420572	0.486954	0.40393	0.315305	0.522014	0.42821	0.506732	0.49215	0.480604	0.395075	0.381389		0.319114	0.619794	0.439312	0.567065	0.513683	0.557991	0.462479	0.496111	0.504103	0.541352	0.419266	0.300683	0.524305	0.420487	0.480167	0.472416	0.623663	0.451797	0.378058	0.457027	0.475598	0.548613
32	0.375216	0.53599	0.44916	0.542324	0.684145	0.627391	0.818609	0.500301	0.474097	0.487769	0.484085	0.542146	0.422256	0.424863	0.292421	0.356641	0.489193	0.387853	0.266161	0.523354	0.410735	0.465654	0.450005	0.424369	0.462708	0.451615		0.363538	0.599375	0.479019	0.583717	0.558774	0.665978	0.525932	0.404193	0.481598	0.586686	0.577479	0.329506	0.515619	0.438651	0.434323	0.463528	0.576027	0.371572	0.368618	0.441453	0.399154	0.549291
33	0.414816	0.500344	0.437355	0.455802	0.765804	0.628626	0.666525	0.545787	0.575183	0.522263	0.598037	0.569081	0.515033	0.646669	0.403956	0.53421	0.63272	0.444722	0.300904	0.530667	0.331468	0.528737	0.485148	0.487056	0.453301	0.437093		0.396142	0.640905	0.460719	0.421736	0.552938	0.46626	0.421014	0.455567	0.533266	0.558814	0.443045	0.377956	0.45657	0.47666	0.497803	0.518054	0.569464	0.492093	0.371014	0.50385	0.49589	0.537548
34	0.37002	0.569712	0.439617	0.487375	0.477316	0.478468	0.581894	0.743915	0.62149	0.524673	0.455572	0.518084	0.632666	0.568761	0.452148	0.513354	0.533891	0.566882	0.246035	0.868504	0.463211	0.523779	0.507586	0.45859	0.479862	0.463622		0.398482	0.609422	0.522915	0.428247	0.517585	0.502356	0.532396	0.514323	0.493843	0.485205	0.485682	0.288038	0.483488	0.462085	0.448939	0.488693	0.57867	0.763815	0.226266	0.411541	0.356038	0.444276
35	0.437197	0.523471	0.480483	0.441767	0.726366	0.715271	0.648971	0.618938	0.599999	0.51224	0.659704	0.485273	0.663874	0.691063	0.260917	0.664535	0.589767	0.468254	0.354915	0.591639	0.432795	0.543366	0.491934	0.508139	0.475918	0.459628		0.539922	0.613419	0.577926	0.433862	0.551924	0.575482	0.45908	0.476251	0.422096	0.484821	0.436826	0.252023	0.499483	0.406598	0.439382	0.521647	0.587515	0.563977	0.508624	0.483717	0.482754	0.515051
36	0.395761	0.508334	0.417364	0.457556	0.691866	0.859686	0.578674	0.829952	0.499885	0.38665	0.432844	0.550695	0.563094	0.484002	0.432219	0.418527	0.529818	0.494311	0.374338	0.519565	0.338664	0.544627	0.497729	0.450895	0.476179	0.459571		0.31326	0.631979	0.525637	0.463954	0.563128	0.475845	0.530889	0.524928	0.487231	0.463913	0.491712	0.375524	0.381035	0.466755	0.386905	0.450316	0.600673	0.463726	-0.0729965	0.345415	0.323637	0.342197
37	0.367378	0.519504	0.424535	0.473693	0.64144	0.654128	0.625807	0.630638	0.658438	0.465667	0.606997	0.431058	0.391137	0.578291	0.366657	0.63068	0.628517	0.347617	0.387206	0.550189	0.508539	0.50051	0.469499	0.465451	0.399291	0.377302		0.421776	0.684926	0.523413	0.44423	0.587366	0.500519	0.488583	0.492427	0.537501	0.533365	0.475614	0.427868	0.451077	0.424829	0.529066	0.420764	0.617003	0.558708	0.360506	0.450093	0.394845	0.444355
38	0.44611	0.508318	0.429662	0.560863	0.56851	0.580212	0.614754	0.554662	0.438735	0.489667	0.62632	0.479859	0.552028	0.5705	0.409125	0.392236	0.543076	0.308882	0.364316	0.615158	0.710985	0.526552	0.418529	0.466904	0.516129	0.50367		0.487331	0.709528	0.546577	0.313639	0.631879	0.51643	0.513209	0.562986	0.531136	0.501438	0.488708	0.462092	0.488722	0.44875	0.344901	0.448891	0.667285	NaN	NaN	NaN	NaN	0.627946
39	0.424987	0.547928	0.525698	0.511609	0.67065	0.625539	0.574768	0.575511	0.472193	0.553141	0.589009	0.480194	0.617974	0.398057	0.427022	0.366564	0.543693	NaN	NaN	NaN	NaN	0.551993	0.528645	0.477423	0.490043	0.472946		0.54173	0.563811	0.358538	0.433945	0.526685	0.493362	0.548868	0.447329	0.586042	0.43698	0.356038	0.314662	0.478898	0.497964	0.374911	0.453811	0.624736	NaN	NaN	NaN	NaN	0.648736
40	0.421202	0.541073	0.416552	0.569041	0.739869	0.628082	0.538162	0.567298	0.494264	0.511122	0.546517	0.487529	0.566319	0.622529	0.414123	0.394806	0.664482	NaN	NaN	NaN	NaN	0.418881	0.512076	0.391604	0.357141	0.335462		0.444467	0.70433	0.51248	0.477543	0.555157	0.55821	0.571564	0.456157	0.490776	0.521644	0.425495	0.333399	0.529314	0.39404	0.48238	0.41873	0.638949	NaN	NaN	NaN	NaN	0.518573
41	0.298573	0.563032	0.467101	0.4678	0.824816	0.643102	0.451566	0.485306	0.53979	0.562485	0.655407	0.452794	0.46237	0.525604	0.420328	0.452625	0.508606	NaN	NaN	NaN	NaN	0.553621	0.583647	0.489133	0.49103	0.475881		0.446544	0.626668	0.55205	0.577056	0.525953	0.532034	0.477063	0.559926	0.556175	0.406123	0.419255	0.341542	0.424257	0.380333	0.387958	0.429046	0.648372	NaN	NaN	NaN	NaN	0.699391
42	0.436825	0.563241	0.432552	0.463526	0.729033	0.505777	0.549251	0.359994	0.53266	0.550605	0.604983	0.589583	0.612941	0.575666	0.358798	0.616854	0.560298	NaN	NaN	NaN	NaN	0.579645	0.488883	0.466729	0.499913	0.476834		0.496186	0.696152	0.558503	0.367765	0.486029	0.45476	0.46809	0.458556	0.448001	0.524945	0.498864	0.287163	0.566666	0.444655	0.376931	0.537555	0.581744	NaN	NaN	NaN	NaN	0.561337
43	0.459487	0.674584	0.400466	0.439521	0.604539	0.709745	0.703354	0.685408	0.558746	0.490576	0.523581	0.477349	0.613153	0.57624	0.366659	0.561582	0.570984	NaN	NaN	NaN	NaN	0.567947	0.60734	0.461092	0.589832	0.579532		0.488392	0.730104	0.528229	0.415953	0.592052	0.545725	0.545388	0.585577	0.460708	0.557335	0.497583	0.351016	0.400204	0.335264	0.465057	0.475984	0.665677	NaN	NaN	NaN	NaN	0.798838
44	0.392038	0.60421	0.436956	0.553337	0.753786	0.650474	0.452354	0.577019	0.416081	0.44882	0.619674	0.509415	0.34039	0.692158	0.395643	0.55588	0.534285	NaN	NaN	NaN	NaN	0.500898	0.694853	0.650035	0.596675	0.638335		0.398037	0.723425	0.538707	0.398782	0.631992	0.584879	0.530939	0.412104	0.443845	0.477088	0.512063	0.299025	0.391139	0.495556	0.513216	0.420593	0.603812	NaN	NaN	NaN	NaN	NaN
45	0.358222	0.510739	0.430888	0.57519	0.739765	0.610816	0.728125	0.639127	0.517338	0.575021	0.487008	0.544828	0.495151	0.495476	0.378158	0.487489	0.610752	NaN	NaN	NaN	NaN	0.341774	0.319277	0.243072	0.541183	0.530427		0.417645	0.639825	0.600459	0.328266	0.569965	0.470652	0.553487	0.535196	0.49947	0.474011	0.591497	0.342824	0.424622	0.347841	0.387876	0.473047	0.635645	NaN	NaN	NaN	NaN	NaN
46	0.386772	0.522391	0.542418	0.370445	0.707032	0.689761	0.815481	0.676604	0.451553	0.507742	0.572184	0.487891	0.498911	0.405778	0.457813	0.580609	0.578879	NaN	NaN	NaN	NaN	NaN	NaN	NaN	NaN	NaN		0.445627	0.731012	0.548	0.966675	0.592496	0.561543	0.568908	0.46549	0.48235	0.476045	0.477852	0.377185	0.468094	0.380491	0.382556	0.394379	0.600491	NaN	NaN	NaN	NaN	0.589279
47	0.388125	0.589852	0.484418	0.53141	0.637977	0.704204	0.634976	0.681488	0.528478	0.601068	0.542566	0.463451	0.603585	0.59785	0.283922	0.492407	0.52795	NaN	NaN	NaN	NaN	NaN	NaN	NaN	NaN	NaN		0.57355	0.660657	0.639058	0.492129	0.462636	0.565777	0.469098	0.50685	0.531974	0.519236	0.479265	0.551351	0.526668	0.33761	0.44933	0.431605	0.607796	NaN	NaN	NaN	NaN	0.691288
48	0.319945	0.550656	0.476281	0.607079	0.734709	0.611643	0.663371	0.66106	0.486664	0.521531	0.617971	0.456982	0.519228	0.578178	0.367249	0.580481	0.600189	NaN	NaN	NaN	NaN	NaN	NaN	NaN	NaN	NaN		0.451084	0.663777	0.51956	0.671822	0.583921	0.571786	0.543994	0.541167	0.594614	0.558733	0.567224	0.366189	0.540967	0.454554	0.36453	0.469301	0.599057	NaN	NaN	NaN	NaN	NaN
49	0.432918	0.556756	0.41579	0.325892	0.722131	0.684041	0.548086	0.557528	0.522671	0.536012	0.451342	0.582196	0.566127	0.564948	0.455376	0.441763	0.611597	NaN	NaN	NaN	NaN	NaN	NaN	NaN	NaN	NaN		0.558833	0.66793	0.553949	0.616368	0.59034	0.661181	0.46219	0.430358	0.667891	0.487967	0.538106	0.35385	0.505098	0.397057	0.416042	0.330497	0.650497	NaN	NaN	NaN	NaN	NaN
50	0.306356	0.562308	0.369273	0.426888	0.753192	0.772051	0.683666	0.564611	0.504766	0.40006	0.457498	0.484443	0.595817	0.696153	0.417194	0.396761	0.61285	NaN	NaN	NaN	NaN	NaN	NaN	NaN	NaN	NaN		0.44659	0.612512	0.450461	0.480931	0.645883	0.559277	0.562344	0.523363	0.510952	0.509392	0.538218	0.290853	0.446011	0.401901	0.329751	0.397598	0.648779	NaN	NaN	NaN	NaN	NaN
51	0.441116	0.565399	0.463909	0.373223	0.631509	0.636471	0.605481	0.718242	0.598883	0.62999	0.429593	0.458599	0.53336	0.506087	0.380088	0.494352	0.614705	NaN	NaN	NaN	NaN	NaN	NaN	NaN	NaN	NaN		0.386419	0.685719	0.56266	NaN	0.597256	0.633453	0.506804	0.49275	0.510038	0.498791	0.493218	0.423788	0.54705	0.381489	0.485681	0.459711	0.694732	NaN	NaN	NaN	NaN	NaN
52	0.407148	0.636852	0.482247	0.333139	0.666979	0.823729	0.728609	0.536322	0.457278	0.392849	0.595185	0.353314	0.549141	0.460641	0.403779	0.461544	0.52139	NaN	NaN	NaN	NaN	NaN	NaN	NaN	NaN	NaN		0.459206	0.67463	0.580724	0.397171	0.587507	0.63323	0.496122	0.56971	0.501888	0.508118	0.427104	0.412949	0.545914	0.456988	0.429393	0.503104	0.568565	NaN	NaN	NaN	NaN	NaN
53	0.443661	0.625035	0.427747	NaN	0.641021	0.627105	0.714056	0.632889	0.431067	0.609495	0.593646	0.512243	0.615303	0.407576	0.416817	0.710558	0.627591	NaN	NaN	NaN	NaN	NaN	NaN	NaN	NaN	NaN		0.448956	0.691008	0.489551	NaN	0.553289	0.509913	0.579168	0.586084	0.330901	0.466761	0.421469	0.335754	0.533578	0.424441	0.57883	0.443956	0.706247	NaN	NaN	NaN	NaN	NaN
54	0.380293	0.611613	0.491653	NaN	0.660458	0.770149	0.753965	0.696009	0.497309	0.625039	0.479477	0.483473	0.579828	0.507524	0.509437	0.606376	0.611952	NaN	NaN	NaN	NaN	NaN	NaN	NaN	NaN	NaN		0.408389	0.669806	0.550586	NaN	0.623644	0.747494	0.397568	0.623922	0.464609	0.39718	0.347083	0.302651	0.499047	0.391871	0.515431	0.521004	0.70329	NaN	NaN	NaN	NaN	NaN
55	0.250561	0.609898	0.387761	NaN	0.635957	0.740376	0.824695	0.561578	0.378055	0.469857	0.569425	0.46281	0.444367	0.551512	0.325473	0.371875	0.552379	NaN	NaN	NaN	NaN	NaN	NaN	NaN	NaN	NaN		0.38899	0.765454	0.589526	NaN	0.683933	0.552112	0.620444	0.533127	0.581434	0.465792	0.462783	0.455165	0.52572	0.307608	0.30871	0.560495	0.706326	NaN	NaN	NaN	NaN	NaN
56	0.44494	0.528289	0.517674	NaN	0.624198	0.79422	0.607508	0.667247	0.469186	0.49945	0.725225	0.536015	0.600481	0.750927	0.401047	0.446301	0.64267	NaN	NaN	NaN	NaN	NaN	NaN	NaN	NaN	NaN		0.41699	0.64096	0.596934	NaN	0.632343	0.56546	0.510587	0.536683	0.484493	0.444997	0.627032	0.354463	0.537913	0.400828	0.371598	0.483533	0.690631	NaN	NaN	NaN	NaN	NaN
57	0.391543	0.616417	0.535169	NaN	0.84362	0.834305	0.536852	0.554556	0.63089	0.453716	0.485658	0.514293	0.479385	0.576448	0.376076	0.60936	0.617268	NaN	NaN	NaN	NaN	NaN	NaN	NaN	NaN	NaN		0.507389	0.705134	0.545506	NaN	0.545473	0.676395	0.548933	0.549484	0.545909	0.567766	0.594211	0.357328	0.51067	0.447429	0.389275	0.497492	0.695414	NaN	NaN	NaN	NaN	NaN
58	0.417166	0.58722	0.487424	NaN	0.683694	0.644289	0.683138	0.893267	0.660176	0.609724	0.535656	0.475882	0.580796	0.470094	0.368757	0.477078	0.627977	NaN	NaN	NaN	NaN	NaN	NaN	NaN	NaN	NaN		0.301772	0.735884	0.622342	NaN	0.590002	0.790716	0.435777	0.548146	0.544627	0.434294	0.498658	0.394275	0.514478	0.37427	0.422854	0.363437	0.678321	NaN	NaN	NaN	NaN	NaN
59	0.488274	0.576652	0.557953	NaN	0.425561	0.556065	0.626867	0.569293	0.66431	0.435229	0.640829	0.507677	0.536302	0.533327	0.459705	0.478044	0.627551	NaN	NaN	NaN	NaN	NaN	NaN	NaN	NaN	NaN		0.481022	0.730564	0.642132	NaN	0.67175	0.689276	0.574034	0.661138	0.572823	0.617786	0.409175	0.448285	0.404067	0.370616	0.305376	0.51952	0.676769	NaN	NaN	NaN	NaN	NaN
60	0.352065	0.596614	0.46856	NaN	0.5231	0.681166	0.770576	1.01786	0.516422	0.589177	0.44362	0.496687	0.573926	0.65464	0.342887	0.60968	0.666674	NaN	NaN	NaN	NaN	NaN	NaN	NaN	NaN	NaN		0.498726	0.777878	0.573241	NaN	0.549481	0.64161	0.705454	0.486249	0.678473	0.607283	0.549254	0.293135	0.429202	0.379223	0.429037	0.430648	0.723437	NaN	NaN	NaN	NaN	NaN
[truncated: 4 more columns]

## Sheet: 2ciii
Figure 2 c.iii
	LC mean F aligned to motion initiation																											LC no reward mean F aligned to motion intiation
time from motion onset	1	2	3	4	5	6	7	8	9	10	11	12	13	14	15	16	17	18	19	20	21	22	23	24				1	2	3	4	5	6	7	8	9	10	11	12	13	14	15	16	17	18	19	20	21	22
-1.93611	0.340125	0.139765	0.276896	NaN	NaN	NaN	NaN	NaN	NaN	NaN	NaN	NaN	NaN	0.270799	0.307717	0.437766	0.341464	0.310431	0.499559	0.216425	0.27666	0.285475	NaN	NaN				0.490164	0.299158	0.396918	0.0408234	0.435434	0.274588	0.317458	0.298242	0.413035	0.387047	0.402165	NaN	NaN	NaN	NaN	0.541277	0.0701895	0.374308	0.491581	0.304067	0.396719	0.179081
-1.8393	0.275508	0.132376	0.309106	NaN	NaN	NaN	NaN	NaN	NaN	NaN	NaN	NaN	NaN	0.171706	0.322705	0.459614	0.454395	0.272631	0.435148	0.240078	0.290516	0.302977	NaN	NaN				0.429398	0.275057	0.379229	0.556589	0.279384	0.284524	0.371652	0.383312	0.375855	0.450746	0.312311	NaN	NaN	NaN	NaN	0.215583	0.169431	0.288087	0.490933	0.27788	0.316358	0.217797
-1.7425	0.303984	0.126672	0.323617	NaN	NaN	NaN	NaN	NaN	NaN	NaN	NaN	NaN	NaN	0.191481	0.273089	0.400444	0.33383	0.304877	0.439646	0.254652	0.327894	0.329774	NaN	NaN				0.419432	0.226077	0.406835	0.523665	0.421475	0.219691	0.446737	0.350343	0.484182	0.442144	0.545987	NaN	NaN	NaN	NaN	-0.0775878	0.101122	0.336974	0.448734	0.309827	0.36036	0.261955
-1.64569	0.317563	0.147396	0.321831	NaN	NaN	NaN	NaN	NaN	NaN	NaN	NaN	NaN	NaN	0.204976	0.255016	0.367951	0.257985	0.346477	0.452394	0.31887	0.348983	0.325919	NaN	NaN				0.399605	0.254965	0.328607	0.297408	0.427682	0.232134	0.298819	0.403233	0.40274	0.43214	0.549867	NaN	NaN	NaN	NaN	0.269219	0.235857	0.418467	0.46134	0.319807	0.412791	0.267504
-1.54889	0.301795	0.143256	0.301405	NaN	NaN	NaN	NaN	NaN	NaN	NaN	NaN	NaN	NaN	0.20648	0.265426	0.507103	0.310153	0.339782	0.428846	0.331328	0.385576	0.346458	NaN	NaN				0.434037	0.26972	0.261137	0.759847	0.37451	0.307634	0.369224	0.454679	0.442595	0.425122	0.406902	NaN	NaN	NaN	NaN	0.209113	0.103325	0.414295	0.58926	0.255392	0.48304	0.234784
-1.45208	0.299155	0.14265	0.303113	NaN	NaN	NaN	NaN	NaN	NaN	NaN	NaN	NaN	NaN	0.271581	0.35358	0.442901	0.411771	0.377427	0.412967	0.2624	0.423482	0.391453	NaN	NaN				0.472087	0.277894	0.345678	0.317527	0.402874	0.242086	0.266629	0.373078	0.358009	0.345318	0.351373	NaN	NaN	NaN	NaN	0.274855	-0.000921045	0.415387	0.637596	0.306305	0.54145	0.227341
-1.35528	0.305228	0.168153	0.305457	NaN	NaN	NaN	NaN	NaN	NaN	NaN	NaN	NaN	NaN	0.349237	0.433604	0.326498	0.545923	0.335879	0.413044	0.195579	0.413295	0.386261	NaN	NaN				0.466312	0.264454	0.476497	0.391313	0.373899	0.296922	0.299605	0.335645	0.354545	0.344565	0.405255	NaN	NaN	NaN	NaN	-0.00554864	-0.0861902	0.437622	0.589425	0.436761	0.456329	0.20533
-1.25847	0.313194	0.151258	0.286751	NaN	NaN	NaN	NaN	NaN	NaN	NaN	NaN	NaN	NaN	0.324159	0.410731	0.300997	0.468569	0.291246	0.381032	0.174004	0.415792	0.367153	NaN	NaN				0.442746	0.237881	0.445271	0.154989	0.426218	0.205454	0.276127	0.385091	0.347066	0.372351	0.370236	NaN	NaN	NaN	NaN	0.00508793	-0.0287558	0.468058	0.553295	0.339016	0.430126	0.248582
-1.16167	0.311946	0.141182	0.315469	NaN	NaN	NaN	NaN	NaN	NaN	NaN	NaN	NaN	NaN	0.256857	0.36435	0.243213	0.346079	0.306332	0.309747	0.194692	0.387784	0.34773	NaN	NaN				0.431506	0.279077	0.290134	0.226573	0.470094	0.26719	0.304086	0.316175	0.541464	0.415376	0.497531	NaN	NaN	NaN	NaN	0.476024	0.0475073	0.495399	0.617696	0.387583	0.55861	0.348236
-1.06486	0.30933	0.147438	0.300243	NaN	NaN	NaN	NaN	NaN	NaN	NaN	NaN	NaN	NaN	0.288974	0.348109	0.299779	0.373703	0.35108	0.36123	0.23108	0.288878	0.272653	NaN	NaN				0.453023	0.304687	0.227968	0.258154	0.428232	0.266457	0.366711	0.281396	0.370129	0.345007	0.376228	NaN	NaN	NaN	NaN	0.232843	0.117592	0.440187	0.51433	0.47176	0.492813	0.408919
-0.968054	0.278699	0.158294	0.280313	NaN	NaN	NaN	NaN	NaN	NaN	NaN	NaN	NaN	NaN	0.269769	0.301961	0.362856	0.448942	0.400665	0.479143	0.22541	0.345266	0.320057	NaN	NaN				0.452601	0.300099	0.234729	0.264596	0.293624	0.317097	0.472545	0.356993	0.331973	0.301668	0.382951	NaN	NaN	NaN	NaN	0.429747	0.129078	0.394058	0.45819	0.431955	0.459067	0.426459
-0.871249	0.268978	0.146453	0.275689	NaN	NaN	NaN	NaN	NaN	NaN	NaN	NaN	NaN	NaN	0.123154	0.258818	0.416188	0.503574	0.390257	0.484754	0.201403	0.358144	0.33558	NaN	NaN				0.469675	0.283429	0.264332	0.610015	0.550542	0.263522	0.403552	0.351996	0.563394	0.346935	0.388408	NaN	NaN	NaN	NaN	0.115707	0.134962	0.42337	0.515756	0.383018	0.437574	0.393645
-0.774443	0.293432	0.126663	0.267408	NaN	NaN	NaN	NaN	NaN	NaN	NaN	NaN	NaN	NaN	0.11974	0.270818	0.354008	0.547508	0.328396	0.404852	0.231633	0.360611	0.346646	NaN	NaN				0.517519	0.241329	0.322297	0.212351	0.561168	0.276486	0.315553	0.332013	0.389533	0.418578	0.514997	NaN	NaN	NaN	NaN	0.528012	0.187204	0.376175	0.496006	0.317599	0.513519	0.373958
-0.677638	0.313717	0.132212	0.332699	NaN	NaN	NaN	NaN	NaN	NaN	NaN	NaN	NaN	NaN	0.180808	0.284364	0.232362	0.542957	0.31026	0.371997	0.227756	0.395202	0.355162	NaN	NaN				0.459275	0.185464	0.348216	0.0805407	0.40173	0.249788	0.381187	0.35242	0.389631	0.301361	0.351233	NaN	NaN	NaN	NaN	0.140794	0.122425	0.280323	0.509448	0.324486	0.511396	0.364252
-0.580833	0.331047	0.149609	0.361925	NaN	NaN	NaN	NaN	NaN	NaN	NaN	NaN	NaN	NaN	0.213581	0.270731	0.270421	0.469238	0.296227	0.356341	0.20476	0.344143	0.296043	NaN	NaN				0.440285	0.184408	0.36475	-0.0278171	0.553913	0.293704	0.303113	0.464683	0.471335	0.465872	0.547987	NaN	NaN	NaN	NaN	0.187775	0.332938	0.38166	0.581153	0.329951	0.386104	0.339966
-0.484027	0.333204	0.168565	0.326045	NaN	NaN	NaN	NaN	NaN	NaN	NaN	NaN	NaN	NaN	0.21396	0.219006	0.366803	0.480282	0.271896	0.345762	0.233745	0.377263	0.341252	NaN	NaN				0.508462	0.23573	0.273533	0.545967	0.472989	0.356532	0.420899	0.421535	0.467576	0.463965	0.394012	NaN	NaN	NaN	NaN	0.175168	0.0515681	0.448023	0.536369	0.435771	0.399904	0.29391
-0.387222	0.324434	0.195799	0.274363	NaN	NaN	NaN	NaN	NaN	NaN	NaN	NaN	NaN	NaN	0.220103	0.223057	0.385529	0.506947	0.331005	0.35138	0.272635	0.371518	0.342682	NaN	NaN				0.515963	0.266056	0.20161	0.368673	0.5753	0.358017	0.406614	0.437566	0.46193	0.459623	0.570711	NaN	NaN	NaN	NaN	0.244895	0.126534	0.375602	0.419506	0.534914	0.34246	0.298147
-0.290416	0.324535	0.199518	0.27607	NaN	NaN	NaN	NaN	NaN	NaN	NaN	NaN	NaN	NaN	0.250511	0.356175	0.466361	0.531983	0.404332	0.432176	0.297008	0.382033	0.37384	NaN	NaN				0.470325	0.283485	0.192772	0.325121	0.480744	0.347536	0.430123	0.34763	0.538539	0.497969	0.528364	NaN	NaN	NaN	NaN	0.236316	0.250686	0.307415	0.44051	0.567096	0.425879	0.326691
-0.193611	0.333168	0.226491	0.339617	NaN	NaN	NaN	NaN	NaN	NaN	NaN	NaN	NaN	NaN	0.289604	0.449124	0.46094	0.483196	0.36683	0.504624	0.374926	0.397802	0.394946	NaN	NaN				0.444433	0.316366	0.228892	0.390819	0.624971	0.3871	0.554454	0.438952	0.351024	0.413244	0.398506	NaN	NaN	NaN	NaN	0.189687	0.207988	0.371783	0.50974	0.603685	0.600081	0.362979
-0.0968054	0.325405	0.296516	0.388976	NaN	NaN	NaN	NaN	NaN	NaN	NaN	NaN	NaN	NaN	0.316642	0.447126	0.341588	0.428015	0.354512	0.515033	0.432656	0.369601	0.364124	NaN	NaN				0.395671	0.332927	0.334464	0.526013	0.586478	0.430054	0.485724	0.370538	0.433003	0.566969	0.584764	NaN	NaN	NaN	NaN	0.319354	0.220141	0.516934	0.61467	0.482241	0.421834	0.459604
-2.22045e-16	0.357304	0.325443	0.382677	NaN	NaN	NaN	NaN	NaN	NaN	NaN	NaN	NaN	NaN	0.267424	0.455129	0.301698	0.410177	0.419683	0.42585	0.451334	0.405114	0.391649	NaN	NaN				0.342487	0.308825	0.387357	0.503955	0.642882	0.502029	0.368244	0.578707	0.326725	0.505265	0.362135	NaN	NaN	NaN	NaN	0.273735	0.115194	0.597967	0.688821	0.452966	0.309336	0.507935
0.0968054	0.376102	0.349585	0.369843	NaN	NaN	NaN	NaN	NaN	NaN	NaN	NaN	NaN	NaN	0.305901	0.568479	0.293027	0.492562	0.482391	0.377779	0.493406	0.461796	0.44529	NaN	NaN				0.325922	0.309878	0.358076	0.452732	0.510918	0.43722	0.507618	0.497803	0.428528	0.538319	0.491612	NaN	NaN	NaN	NaN	0.475546	0.224654	0.660344	0.699306	0.547209	0.38507	0.540955
0.193611	0.351746	0.365837	0.374898	NaN	NaN	NaN	NaN	NaN	NaN	NaN	NaN	NaN	NaN	0.359885	0.483795	0.33102	0.477753	0.516015	0.425314	0.513397	0.469326	0.464835	NaN	NaN				0.326102	0.352722	0.344919	0.539102	0.459866	0.528699	0.660007	0.738185	0.494948	0.517741	0.513304	NaN	NaN	NaN	NaN	0.31528	0.216939	0.683778	0.68407	0.547122	0.483723	0.592993
0.290416	0.36718	0.389987	0.380128	NaN	NaN	NaN	NaN	NaN	NaN	NaN	NaN	NaN	NaN	0.359542	0.427289	0.380093	0.414777	0.513625	0.41751	0.485101	0.495386	0.499675	NaN	NaN				0.359031	0.422458	0.322797	0.550039	0.667761	0.439369	0.681221	0.348858	0.501012	0.509998	0.441298	NaN	NaN	NaN	NaN	0.353728	0.331103	0.673557	0.658091	0.544394	0.521793	0.608896
0.387222	0.395119	0.435531	0.420978	NaN	NaN	NaN	NaN	NaN	NaN	NaN	NaN	NaN	NaN	0.417479	0.44383	0.389698	0.472048	0.531731	0.297139	0.486321	0.560382	0.544927	NaN	NaN				0.412202	0.458082	0.373443	0.315453	0.642379	0.479275	0.451503	0.514891	0.466375	0.572682	0.431244	NaN	NaN	NaN	NaN	0.446684	0.266212	0.726486	0.638689	0.599695	0.45623	0.623704
0.484027	0.428619	0.476707	0.433037	NaN	NaN	NaN	NaN	NaN	NaN	NaN	NaN	NaN	NaN	0.4731	0.42368	0.347591	0.480867	0.543882	0.280515	0.495321	0.596972	0.575656	NaN	NaN				0.456651	0.46219	0.493343	0.516215	0.502437	0.56757	0.634544	0.541818	0.646957	0.637397	0.616269	NaN	NaN	NaN	NaN	0.346556	0.422242	0.685839	0.640308	0.639824	0.439077	0.601258
0.580833	0.454114	0.493618	0.405707	NaN	NaN	NaN	NaN	NaN	NaN	NaN	NaN	NaN	NaN	0.427606	0.429883	0.373726	0.446801	0.517536	0.312386	0.449121	0.492069	0.497031	NaN	NaN				0.435701	0.458859	0.399781	0.397718	0.587084	0.618566	0.577452	0.705228	0.580137	0.547609	0.434934	NaN	NaN	NaN	NaN	0.406044	0.32004	0.588527	0.58563	0.535537	0.448723	0.544469
0.677638	0.437749	0.528893	0.403015	NaN	NaN	NaN	NaN	NaN	NaN	NaN	NaN	NaN	NaN	0.390454	0.402617	0.461073	0.49415	0.496942	0.280387	0.424659	0.454225	0.449971	NaN	NaN				0.408064	0.483456	0.304014	0.356527	0.623762	0.612427	0.595584	0.507448	0.429919	0.433181	0.537793	NaN	NaN	NaN	NaN	0.704636	0.430048	0.644869	0.673926	0.580765	0.455469	0.539923
0.774443	0.428525	0.582309	0.437939	NaN	NaN	NaN	NaN	NaN	NaN	NaN	NaN	NaN	NaN	0.400022	0.358068	0.563674	0.520963	0.496031	0.254943	0.399188	0.414475	0.386286	NaN	NaN				0.465898	0.530576	0.383484	0.531959	0.573572	0.632901	0.495018	0.545846	0.598094	0.486263	0.647869	NaN	NaN	NaN	NaN	0.214048	0.311963	0.693521	0.713434	0.65626	0.490221	0.533506
0.871249	0.414144	0.582179	0.473995	NaN	NaN	NaN	NaN	NaN	NaN	NaN	NaN	NaN	NaN	0.364922	0.33662	0.628435	0.453008	0.524209	0.286111	0.415681	0.378443	0.346171	NaN	NaN				0.516686	0.583159	0.497567	0.320042	0.58728	0.661759	0.626846	0.466435	0.64949	0.59487	0.56529	NaN	NaN	NaN	NaN	0.77517	0.431451	0.711512	0.565675	0.537194	0.462134	0.535532
0.968054	0.419894	0.573154	0.501321	NaN	NaN	NaN	NaN	NaN	NaN	NaN	NaN	NaN	NaN	0.405845	0.290232	0.601071	0.36556	0.521152	0.312107	0.470206	0.475854	0.413235	NaN	NaN				0.500018	0.599322	0.492625	0.45879	0.649182	0.50597	0.459134	0.539572	0.536606	0.510526	0.520531	NaN	NaN	NaN	NaN	0.494341	0.404234	0.644415	0.469761	0.465705	0.351687	0.563684
1.06486	0.404775	0.579517	0.487258	NaN	NaN	NaN	NaN	NaN	NaN	NaN	NaN	NaN	NaN	0.452276	0.291427	0.500908	0.356929	0.479953	0.346014	0.521674	0.590292	0.536912	NaN	NaN				0.5621	0.573419	0.515374	0.334909	0.618917	0.555837	0.488622	0.324456	0.54024	0.546673	0.624816	NaN	NaN	NaN	NaN	0.201388	0.346682	0.547572	0.47384	0.423716	0.382838	0.597117
1.16167	0.407329	0.590633	0.482596	NaN	NaN	NaN	NaN	NaN	NaN	NaN	NaN	NaN	NaN	0.365786	0.349316	0.520376	0.377228	0.43849	0.413433	0.530615	0.638552	0.611802	NaN	NaN				0.632581	0.583026	0.584029	0.267665	0.688035	0.491189	0.598605	0.502799	0.522505	0.435734	0.557703	NaN	NaN	NaN	NaN	0.627435	0.541525	0.584106	0.512915	0.429511	0.542791	0.583658
1.25847	0.426757	0.590285	0.495514	NaN	NaN	NaN	NaN	NaN	NaN	NaN	NaN	NaN	NaN	0.288332	0.378815	0.583107	0.385123	0.478222	0.480247	0.47891	0.616202	0.594195	NaN	NaN				0.631363	0.626893	0.57601	0.551076	0.567246	0.77905	0.653859	0.53235	0.547717	0.584973	0.465373	NaN	NaN	NaN	NaN	0.429308	0.457504	0.621505	0.534362	0.512731	0.490864	0.629288
1.35528	0.442963	0.599184	0.525744	NaN	NaN	NaN	NaN	NaN	NaN	NaN	NaN	NaN	NaN	0.32555	0.386772	0.487784	0.401069	0.530718	0.432533	0.438731	0.585694	0.573691	NaN	NaN				0.604431	0.644604	0.494987	0.381385	0.570775	0.594738	0.53039	0.623062	0.595612	0.411668	0.554562	NaN	NaN	NaN	NaN	0.60632	0.588332	0.599906	0.560394	0.510701	0.299021	0.682479
1.45208	0.399168	0.597556	0.569937	NaN	NaN	NaN	NaN	NaN	NaN	NaN	NaN	NaN	NaN	0.369456	0.322226	0.481009	0.382471	0.57718	0.420226	0.477751	0.489058	0.485026	NaN	NaN				0.558514	0.620869	0.423994	0.285321	0.648696	0.34121	0.517417	0.451928	0.383299	0.527548	0.599712	NaN	NaN	NaN	NaN	0.402615	0.502668	0.571603	0.5729	0.48159	0.2485	0.591774
1.54889	0.355695	0.57263	0.490745	NaN	NaN	NaN	NaN	NaN	NaN	NaN	NaN	NaN	NaN	0.368434	0.323988	0.450016	0.419817	0.625952	0.442902	0.482083	0.483892	0.448269	NaN	NaN				0.524811	0.641536	0.493284	0.587277	0.580173	0.635668	0.597701	0.469987	0.533334	0.480571	0.550142	NaN	NaN	NaN	NaN	0.99477	0.529918	0.537989	0.515404	0.569722	0.269328	0.452205
1.64569	0.348275	0.549396	0.384101	NaN	NaN	NaN	NaN	NaN	NaN	NaN	NaN	NaN	NaN	0.354081	0.270854	0.400708	0.451199	0.606338	0.472006	0.512131	0.564463	0.521831	NaN	NaN				0.489276	0.630409	0.576132	0.328047	0.743781	0.615603	0.440019	0.508169	0.552592	0.429742	0.520805	NaN	NaN	NaN	NaN	0.482712	0.74354	0.535029	0.413331	0.531079	0.216676	0.491182
1.7425	0.34131	0.553387	0.405173	NaN	NaN	NaN	NaN	NaN	NaN	NaN	NaN	NaN	NaN	0.320904	0.230263	0.391819	0.44398	0.52774	0.480105	0.526892	0.564999	0.531271	NaN	NaN				0.467987	0.602517	0.494736	0.360676	0.536934	0.598598	0.462452	0.384544	0.652107	0.571251	0.502947	NaN	NaN	NaN	NaN	0.677467	0.782183	0.593904	0.379657	0.522885	0.364005	0.593872
1.8393	0.344852	0.544606	0.434967	NaN	NaN	NaN	NaN	NaN	NaN	NaN	NaN	NaN	NaN	0.23991	0.317427	0.379524	0.501413	0.60774	0.528509	0.521562	0.420493	0.411261	NaN	NaN				0.41493	0.588423	0.375486	0.37824	0.532826	0.410547	0.576651	0.515342	0.340338	0.479408	0.515594	NaN	NaN	NaN	NaN	0.383338	0.88035	0.655943	0.441517	0.462947	0.549797	0.697304
1.93611	0.341423	0.514282	0.424328	NaN	NaN	NaN	NaN	NaN	NaN	NaN	NaN	NaN	NaN	0.296778	0.340239	0.373933	0.44864	0.64555	0.550341	0.481282	0.308198	0.316176	NaN	NaN				0.381653	0.602114	0.290701	0.275148	0.579143	0.491619	0.502017	0.429173	0.573705	0.622651	0.477936	NaN	NaN	NaN	NaN	0.440001	0.854237	0.610125	0.494393	0.389372	0.433297	0.707679
2.03291	0.363614	0.501295	0.435654	NaN	NaN	NaN	NaN	NaN	NaN	NaN	NaN	NaN	NaN	0.347097	0.377863	0.381504	0.397279	0.62682	0.452784	0.430909	0.361214	0.352821	NaN	NaN				0.401454	0.631983	0.358403	0.358027	0.607189	0.407688	0.542553	0.499256	0.495764	0.582751	0.332757	NaN	NaN	NaN	NaN	0.329099	0.746691	0.518915	0.550415	0.38342	0.271285	0.615117
2.12972	0.365037	0.538539	0.444885	NaN	NaN	NaN	NaN	NaN	NaN	NaN	NaN	NaN	NaN	0.281659	0.354146	0.509376	0.42717	0.632742	0.484325	0.418847	0.405855	0.400388	NaN	NaN				0.44081	0.62699	0.508475	0.594544	0.551802	0.530447	0.681013	0.559265	0.489199	0.443259	0.631147	NaN	NaN	NaN	NaN	0.579182	0.793727	0.562678	0.573542	0.379458	0.292548	0.594153
2.22652	0.385689	0.562957	0.426795	NaN	NaN	NaN	NaN	NaN	NaN	NaN	NaN	NaN	NaN	0.290756	0.322594	0.564975	0.552755	0.594129	0.551429	0.445171	0.468145	0.463045	NaN	NaN				0.437422	0.609287	0.525192	0.440911	0.437921	0.412074	0.59816	0.452209	0.37444	0.482601	0.517186	NaN	NaN	NaN	NaN	0.382737	0.792056	0.616489	0.520281	0.308746	0.424924	0.618646
2.32333	0.377658	0.576384	0.421924	NaN	NaN	NaN	NaN	NaN	NaN	NaN	NaN	NaN	NaN	0.321457	0.277373	0.549009	0.615252	0.548685	0.507686	0.517628	0.522304	0.505795	NaN	NaN				0.406538	0.621614	0.568984	0.323762	0.595527	0.606565	0.521652	0.463743	0.520403	0.357488	0.409526	NaN	NaN	NaN	NaN	0.120624	0.513131	0.650549	0.497795	0.299781	0.477622	0.595221
2.42014	0.323392	0.600035	0.405405	NaN	NaN	NaN	NaN	NaN	NaN	NaN	NaN	NaN	NaN	0.283383	0.280067	0.53397	0.507959	0.548588	0.491273	0.577406	0.55047	0.514523	NaN	NaN				0.427452	0.689863	0.447349	0.721445	0.377897	0.56807	0.491993	0.48747	0.403854	0.450056	0.447892	NaN	NaN	NaN	NaN	0.509152	0.644257	0.651161	0.488651	0.344315	0.446285	0.592777
2.51694	0.321192	0.614198	0.442321	NaN	NaN	NaN	NaN	NaN	NaN	NaN	NaN	NaN	NaN	0.282029	0.32158	0.430461	0.394535	0.518386	0.425128	0.622316	0.553072	0.499364	NaN	NaN				0.459985	0.706518	0.464048	0.370612	0.570255	0.654172	0.421991	0.456179	0.410247	0.534446	0.567989	NaN	NaN	NaN	NaN	0.195288	0.667984	0.671095	0.426083	0.388202	0.449731	0.615559
2.61375	0.388758	0.65677	0.457497	NaN	NaN	NaN	NaN	NaN	NaN	NaN	NaN	NaN	NaN	0.258904	0.277424	0.396481	0.409552	0.508976	0.472093	0.63742	0.484607	0.443612	NaN	NaN				0.491872	0.695252	0.592735	0.487354	0.505717	0.55729	0.42853	0.473497	0.508097	0.529675	0.40884	NaN	NaN	NaN	NaN	0.591298	0.638528	0.695017	0.435486	0.453828	0.434578	0.53398
2.71055	0.421059	0.700533	0.462837	NaN	NaN	NaN	NaN	NaN	NaN	NaN	NaN	NaN	NaN	0.254642	0.218386	0.35878	0.440697	0.506974	0.575605	0.531403	0.411823	0.395584	NaN	NaN				0.504042	0.67809	0.573456	0.6441	0.731031	0.559055	0.439754	0.494101	0.526884	0.467207	0.494788	NaN	NaN	NaN	NaN	0.774041	0.740263	0.680354	0.538175	0.557478	0.43145	0.522447
2.80736	0.425046	0.698942	0.470299	NaN	NaN	NaN	NaN	NaN	NaN	NaN	NaN	NaN	NaN	0.325674	0.184591	0.456116	0.445125	0.581783	0.57093	0.481738	0.378045	0.385259	NaN	NaN				0.476052	0.677385	0.611854	-0.119677	0.663808	0.68381	0.548975	0.485992	0.448649	0.36474	0.560425	NaN	NaN	NaN	NaN	0.462692	0.554094	0.611549	0.566869	0.576323	0.486885	0.572835
2.90416	0.426063	0.628763	0.527875	NaN	NaN	NaN	NaN	NaN	NaN	NaN	NaN	NaN	NaN	0.33346	0.211988	0.529093	0.50739	0.621697	0.505326	0.475423	0.372821	0.381447	NaN	NaN				0.47799	0.723844	0.611913	0.386199	0.444975	0.599627	0.522217	0.495454	0.501166	0.491945	0.50143	NaN	NaN	NaN	NaN	0.398596	0.569234	0.593037	0.523128	0.558157	0.518612	0.662257
3.00097	0.39009	0.591375	0.53326	NaN	NaN	NaN	NaN	NaN	NaN	NaN	NaN	NaN	NaN	0.25306	0.234154	0.447973	0.48031	0.510665	0.457061	0.39603	0.321011	0.323087	NaN	NaN				0.454695	0.714151	0.553323	0.610457	0.578693	0.557405	0.517738	0.487238	0.419788	0.457876	0.483464	NaN	NaN	NaN	NaN	0.493755	0.508385	0.613049	0.483246	0.480752	0.466807	0.724081
3.09777	0.397995	0.61188	0.467042	NaN	NaN	NaN	NaN	NaN	NaN	NaN	NaN	NaN	NaN	0.304061	0.258791	0.464592	0.491838	0.467166	0.501512	0.393865	0.264166	0.266361	NaN	NaN				0.422863	0.721905	0.557922	0.724134	0.621834	0.41331	0.595123	0.463743	0.542243	0.597809	0.551568	NaN	NaN	NaN	NaN	0.564911	0.50109	0.559361	0.474896	0.462889	0.435641	0.631861
3.19458	0.409233	0.624225	0.487986	NaN	NaN	NaN	NaN	NaN	NaN	NaN	NaN	NaN	NaN	0.350955	0.299973	0.560595	0.575825	0.453806	0.591893	0.453936	0.262332	0.258031	NaN	NaN				0.414748	0.679541	0.520448	0.0577727	0.591937	0.535503	0.413935	0.470011	0.487632	0.398636	0.530082	NaN	NaN	NaN	NaN	0.653094	0.638368	0.533185	0.479645	0.487904	0.417961	0.616643
3.29138	0.393796	0.6358	0.504022	NaN	NaN	NaN	NaN	NaN	NaN	NaN	NaN	NaN	NaN	0.253841	0.296655	0.47852	0.751465	0.437426	0.585364	0.482517	0.381152	0.36338	NaN	NaN				0.440488	0.624887	0.485733	0.41417	0.493045	0.453919	0.54467	0.475097	0.504427	0.622644	0.535113	NaN	NaN	NaN	NaN	0.434172	0.529392	0.533323	0.502333	0.375982	0.35176	0.698864
3.38819	0.372684	0.68586	0.593971	NaN	NaN	NaN	NaN	NaN	NaN	NaN	NaN	NaN	NaN	0.224519	0.279318	0.442711	0.672544	0.513922	0.512897	0.520957	0.554617	0.533659	NaN	NaN				0.536458	0.613253	0.50929	0.661964	0.641103	0.521636	0.531822	0.532191	0.468778	0.548609	0.314972	NaN	NaN	NaN	NaN	0.552993	0.636532	0.502254	0.520642	0.312185	0.282401	0.688633
3.485	0.385277	0.673954	0.549352	NaN	NaN	NaN	NaN	NaN	NaN	NaN	NaN	NaN	NaN	0.211239	0.337957	0.49613	0.455004	0.566142	0.555177	0.412831	0.573373	0.55585	NaN	NaN				0.484696	0.669881	0.423797	0.552394	0.522439	0.648512	0.597322	0.523252	0.499483	0.359317	0.499996	NaN	NaN	NaN	NaN	0.435892	0.469669	0.465301	0.527171	0.420332	0.36993	0.606827
3.5818	0.415699	0.645188	0.425753	NaN	NaN	NaN	NaN	NaN	NaN	NaN	NaN	NaN	NaN	0.263754	0.35654	0.543693	0.548335	0.582205	0.662122	0.399865	0.47461	0.455142	NaN	NaN				0.437281	0.73803	0.426967	0.328198	0.56263	0.490997	0.648424	0.523686	0.399136	0.530248	0.559283	NaN	NaN	NaN	NaN	0.67942	0.762868	0.492511	0.481145	0.533665	0.573119	0.613083
3.67861	0.429155	0.615663	0.463412	NaN	NaN	NaN	NaN	NaN	NaN	NaN	NaN	NaN	NaN	0.304409	0.333452	0.536007	0.634596	0.577045	0.67529	0.463975	0.422135	0.426172	NaN	NaN				0.466527	0.673709	0.460554	0.358167	0.500312	0.642832	0.46416	0.552936	0.505555	0.558836	0.528036	NaN	NaN	NaN	NaN	0.858177	0.634074	0.521364	0.560566	0.468285	0.627948	0.648234
3.77541	0.425208	0.588097	0.541793	NaN	NaN	NaN	NaN	NaN	NaN	NaN	NaN	NaN	NaN	0.215904	0.267949	0.458526	0.488179	0.513419	0.654355	0.47958	0.421378	0.430395	NaN	NaN				0.487391	0.620084	0.470626	0.527948	0.554686	0.376464	0.487757	0.591723	0.478853	0.538864	0.51139	NaN	NaN	NaN	NaN	0.331854	0.614903	0.534657	0.63234	0.343814	0.507197	0.717252
3.87222	0.42708	0.583734	0.524993	NaN	NaN	NaN	NaN	NaN	NaN	NaN	NaN	NaN	NaN	0.238197	0.303569	0.452425	0.385265	0.536939	0.605328	0.465944	0.407511	0.398205	NaN	NaN				0.501349	0.635106	0.621788	0.333149	0.493672	0.618483	0.505672	0.418751	0.525436	0.595083	0.445619	NaN	NaN	NaN	NaN	0.325995	0.601783	0.551697	0.649706	0.352458	0.470567	0.823231
3.96902	0.42684	0.596436	0.468353	NaN	NaN	NaN	NaN	NaN	NaN	NaN	NaN	NaN	NaN	0.338529	0.370139	0.614562	0.458336	0.618651	0.530909	0.504028	0.427945	0.420074	NaN	NaN				0.455326	0.654355	0.588019	0.444624	0.426345	0.526343	0.461571	0.47966	0.472013	0.549879	0.575468	NaN	NaN	NaN	NaN	0.458228	0.564214	0.578391	0.646347	0.43245	0.629721	0.858931
4.06583	0.381946	0.618459	0.469762	NaN	NaN	NaN	NaN	NaN	NaN	NaN	NaN	NaN	NaN	0.276988	0.327949	0.511074	0.436864	0.614971	0.514771	0.535537	0.416478	0.411969	NaN	NaN				0.456886	0.642063	0.542361	0.452547	0.40492	0.531931	0.458537	0.39931	0.503254	0.514911	0.493535	NaN	NaN	NaN	NaN	0.729954	0.617007	0.612233	0.632275	0.542716	0.524024	0.782565
4.16263	0.401979	0.603029	0.46294	NaN	NaN	NaN	NaN	NaN	NaN	NaN	NaN	NaN	NaN	0.192174	0.256453	0.357399	0.422167	0.538688	0.581926	0.532421	0.432197	0.438229	NaN	NaN				0.484025	0.679472	0.514361	0.354346	0.448074	0.491474	0.474334	0.487107	0.46597	0.549427	0.577398	NaN	NaN	NaN	NaN	0.452112	0.696696	0.579645	0.715079	0.593134	0.342718	0.766464
4.25944	0.430463	0.578825	0.491416	NaN	NaN	NaN	NaN	NaN	NaN	NaN	NaN	NaN	NaN	0.19664	0.247724	0.385482	0.538444	0.5222	0.641849	0.547626	0.444133	0.454731	NaN	NaN				0.433375	0.694378	0.457715	0.203083	0.577716	0.495274	0.349567	0.449299	0.411913	0.475256	0.53295	NaN	NaN	NaN	NaN	0.114845	0.645858	0.489807	0.758237	0.483709	0.378669	0.758355
4.35624	0.375188	0.586134	0.525059	NaN	NaN	NaN	NaN	NaN	NaN	NaN	NaN	NaN	NaN	0.265427	0.254506	0.427704	0.645783	0.560027	0.64343	0.540883	0.428834	0.405415	NaN	NaN				0.361212	0.672522	0.517714	0.455161	0.540646	0.512276	0.388325	0.544239	0.409575	0.51837	0.500207	NaN	NaN	NaN	NaN	0.515307	0.644239	0.477727	0.658157	0.513841	0.487294	0.722935
4.45305	0.340935	0.591984	0.457766	NaN	NaN	NaN	NaN	NaN	NaN	NaN	NaN	NaN	NaN	0.322379	0.246552	0.437985	0.627929	0.52541	0.586802	0.505621	0.339657	0.341472	NaN	NaN				0.407545	0.74735	0.590063	0.399062	0.472288	0.519643	0.461161	0.454528	0.485613	0.484211	0.436543	NaN	NaN	NaN	NaN	0.580245	0.613576	0.499442	0.554384	0.609119	0.522772	0.695109
4.54985	0.350548	0.601594	0.38663	NaN	NaN	NaN	NaN	NaN	NaN	NaN	NaN	NaN	NaN	0.294722	0.298702	0.440004	0.490541	0.55586	0.551626	0.491246	0.289252	0.299139	NaN	NaN				0.483856	0.749127	0.678847	0.532296	0.500917	0.60863	0.430394	0.439804	0.487321	0.461091	0.34911	NaN	NaN	NaN	NaN	0.58843	0.529797	0.417559	0.466977	0.450087	0.401641	0.692496
4.64666	0.369277	0.590963	0.384811	NaN	NaN	NaN	NaN	NaN	NaN	NaN	NaN	NaN	NaN	0.287045	0.333694	0.470007	0.440021	0.643794	0.537818	0.557301	0.296694	0.266924	NaN	NaN				0.509915	0.678348	0.749667	0.657032	0.562137	0.561494	0.405278	0.52718	0.742704	0.505843	0.39778	NaN	NaN	NaN	NaN	0.725375	0.513152	0.459338	0.458806	0.351054	0.394642	0.661313
4.74347	0.411256	0.595967	0.419408	NaN	NaN	NaN	NaN	NaN	NaN	NaN	NaN	NaN	NaN	0.257763	0.274619	0.478118	0.434055	0.648525	0.534023	0.561543	0.388036	0.344739	NaN	NaN				0.479688	0.643371	0.728262	0.471725	0.568104	0.588581	0.512819	0.489168	0.384559	0.401852	0.3927	NaN	NaN	NaN	NaN	0.257827	0.595272	0.500772	0.565725	0.426395	0.388803	0.598459
4.84027	0.444835	0.590381	0.484295	NaN	NaN	NaN	NaN	NaN	NaN	NaN	NaN	NaN	NaN	0.233923	0.198837	0.480071	0.439268	0.53627	0.545912	0.469877	0.418835	0.402916	NaN	NaN				0.51845	0.673338	0.614121	0.205497	0.558865	0.5956	0.480549	0.512883	0.381373	0.51035	0.459928	NaN	NaN	NaN	NaN	0.367688	0.302557	0.475305	0.549218	0.469615	0.349469	0.615964
4.93708	0.435776	0.551509	0.495121	NaN	NaN	NaN	NaN	NaN	NaN	NaN	NaN	NaN	NaN	0.258555	0.11303	0.502275	0.403333	0.565753	0.531639	0.432614	0.388094	0.367796	NaN	NaN				0.50836	0.709072	0.577186	0.514095	0.655305	0.511123	0.665933	0.527478	0.512334	0.373774	0.525334	NaN	NaN	NaN	NaN	0.631439	0.504903	0.486487	0.443448	0.473554	0.3242	0.739797
5.03388	0.419976	0.545869	0.500986	NaN	NaN	NaN	NaN	NaN	NaN	NaN	NaN	NaN	NaN	0.355265	0.215191	0.397614	0.359103	0.578598	0.579907	0.464391	0.352705	0.313836	NaN	NaN				0.490644	0.669768	0.524957	0.690436	0.481618	0.483617	0.489717	0.674654	0.406742	0.36145	0.508794	NaN	NaN	NaN	NaN	0.720454	0.43252	0.455004	0.470898	0.521257	0.411967	0.820046
5.13069	0.399414	0.557779	0.487019	NaN	NaN	NaN	NaN	NaN	NaN	NaN	NaN	NaN	NaN	0.380705	0.275873	0.340804	0.374876	0.5615	0.643226	0.501942	0.317143	0.25592	NaN	NaN				0.47683	0.65931	0.544185	0.366235	0.593639	0.581357	0.504214	0.504498	0.471861	0.473458	0.566477	NaN	NaN	NaN	NaN	0.486186	0.420205	0.421902	0.426727	0.685744	0.470443	0.808638
5.22749	0.401212	0.544936	0.424478	NaN	NaN	NaN	NaN	NaN	NaN	NaN	NaN	NaN	NaN	0.309245	0.189453	0.370922	0.356062	0.573955	0.655991	0.473534	0.319781	0.259356	NaN	NaN				0.481538	0.665696	0.58074	0.284508	0.599497	0.462184	0.471691	0.543263	0.508896	0.643066	0.452549	NaN	NaN	NaN	NaN	0.229653	0.540815	0.488001	0.477937	0.619376	0.487787	0.819616
5.3243	0.423464	0.540585	0.453332	NaN	NaN	NaN	NaN	NaN	NaN	NaN	NaN	NaN	NaN	0.298562	0.201243	0.399259	0.35827	0.478422	0.616021	0.423823	0.335354	0.320161	NaN	NaN				0.511269	0.649329	0.719327	0.289	0.576875	0.554114	0.634912	0.496782	0.442307	0.407526	0.354892	NaN	NaN	NaN	NaN	0.183515	0.375224	0.506597	0.528416	0.449621	0.494681	0.729309
5.4211	0.411528	0.549677	0.452851	NaN	NaN	NaN	NaN	NaN	NaN	NaN	NaN	NaN	NaN	0.302256	0.218726	0.460723	0.376484	0.447984	0.553045	0.43532	0.38391	0.359224	NaN	NaN				0.513646	0.638509	0.748212	0.106904	0.429322	0.588252	0.403282	0.550693	0.511196	0.488772	0.498198	NaN	NaN	NaN	NaN	0.299568	0.597292	0.501073	0.411517	0.406589	0.455469	0.649772
5.51791	0.383182	0.576964	0.454908	NaN	NaN	NaN	NaN	NaN	NaN	NaN	NaN	NaN	NaN	0.314859	0.196796	0.610185	0.405001	0.474964	0.483636	0.446664	0.424746	0.413206	NaN	NaN				0.486214	0.675303	0.626598	0.738389	0.628991	0.618828	0.375742	0.512525	0.507706	0.570771	0.442896	NaN	NaN	NaN	NaN	0.896517	0.481645	0.475577	0.438493	0.583448	0.383174	0.692853
5.61471	0.360959	0.592127	0.473974	NaN	NaN	NaN	NaN	NaN	NaN	NaN	NaN	NaN	NaN	0.348257	0.198704	0.53539	0.44837	0.51628	0.485133	0.407373	0.382926	0.377299	NaN	NaN				0.493254	0.661	0.55425	0.360783	0.672702	0.475486	0.649082	0.55044	0.55185	0.320817	0.456896	NaN	NaN	NaN	NaN	0.567577	0.624398	0.459462	0.565539	0.730629	0.351027	0.665285
5.71152	0.370412	0.579882	0.465075	NaN	NaN	NaN	NaN	NaN	NaN	NaN	NaN	NaN	NaN	0.374442	0.235163	0.357823	0.424036	0.520254	0.548058	0.4348	0.388691	0.367533	NaN	NaN				0.461286	0.631596	0.54705	0.97889	0.565322	0.525989	0.421293	0.556397	0.493663	0.451532	0.239993	NaN	NaN	NaN	NaN	0.594844	0.362055	0.515136	0.541431	0.60969	0.428608	0.614459
5.80833	0.383975	0.547319	0.435822	NaN	NaN	NaN	NaN	NaN	NaN	NaN	NaN	NaN	NaN	0.409568	0.27454	0.44809	0.415308	0.568769	0.580614	0.465787	0.43586	0.434369	NaN	NaN				0.360975	0.600169	0.567885	0.730485	0.465631	0.411376	0.428873	0.419155	0.405643	0.451586	0.330869	NaN	NaN	NaN	NaN	0.404958	0.632062	0.531508	0.467487	0.50565	0.407593	0.641929
5.90513	0.347338	0.52117	0.426987	NaN	NaN	NaN	NaN	NaN	NaN	NaN	NaN	NaN	NaN	0.390245	0.242911	0.548289	0.426515	0.606994	0.472319	0.438807	0.411939	0.418349	NaN	NaN				0.359774	0.639693	0.594175	0.25471	0.530498	0.498122	0.353787	0.545734	0.442192	0.591165	0.44273	NaN	NaN	NaN	NaN	0.364108	0.679981	0.461598	0.464321	0.558988	0.385803	0.656947
6.00194	0.315338	0.526763	0.438149	NaN	NaN	NaN	NaN	NaN	NaN	NaN	NaN	NaN	NaN	0.341423	0.281422	0.474272	0.439469	0.604865	0.410129	0.464242	0.398848	0.395845	NaN	NaN				0.445958	0.713398	0.551522	0.491259	0.584876	0.575606	0.511988	0.524198	0.446859	0.55544	0.482677	NaN	NaN	NaN	NaN	0.689406	0.468305	0.501874	0.504752	0.598104	0.386854	0.654244
6.09874	0.328741	0.514926	0.389389	NaN	NaN	NaN	NaN	NaN	NaN	NaN	NaN	NaN	NaN	0.361785	0.289222	0.499343	0.590045	0.578862	0.397889	0.470991	0.456443	0.449225	NaN	NaN				0.477792	0.693608	0.419311	0.604311	0.53482	0.43118	0.530207	0.42105	0.406384	0.402971	0.278091	NaN	NaN	NaN	NaN	0.590396	0.427525	0.537488	0.484609	0.495867	0.340504	0.68853
6.19555	0.37383	0.515513	0.384644	NaN	NaN	NaN	NaN	NaN	NaN	NaN	NaN	NaN	NaN	0.356817	0.256897	0.564716	0.538076	0.518971	0.457202	0.408631	0.480931	0.459725	NaN	NaN				0.414643	0.644445	0.372139	0.275091	0.462174	0.54383	0.454053	0.601112	0.448778	0.474795	0.501759	NaN	NaN	NaN	NaN	0.355741	0.377914	0.581137	0.453437	0.549684	0.405064	0.692582
6.29235	0.376371	0.508141	0.453249	NaN	NaN	NaN	NaN	NaN	NaN	NaN	NaN	NaN	NaN	0.300447	0.20912	0.467713	0.44253	0.483954	0.463871	0.360515	0.458042	0.43272	NaN	NaN				0.379474	0.607952	0.460545	0.345499	0.419303	0.513037	0.417142	0.366232	0.61129	0.402527	0.336772	NaN	NaN	NaN	NaN	0.335048	0.376392	0.589254	0.459031	0.614414	0.480281	0.634058
6.38916	0.370991	0.467313	0.529659	NaN	NaN	NaN	NaN	NaN	NaN	NaN	NaN	NaN	NaN	0.243067	0.155041	0.342469	0.478586	0.520718	0.458972	0.422623	0.486607	0.445094	NaN	NaN				0.389284	0.606641	0.506165	0.373745	0.462085	0.511355	0.418597	0.545828	0.614454	0.538317	0.415764	NaN	NaN	NaN	NaN	0.291115	0.348909	0.496037	0.498332	0.51779	0.51253	0.597213
6.48596	0.374308	0.435968	0.600557	NaN	NaN	NaN	NaN	NaN	NaN	NaN	NaN	NaN	NaN	0.298403	0.248914	0.335509	0.449993	0.541652	0.479055	0.456666	0.518947	0.486627	NaN	NaN				0.393968	0.582449	0.528165	0.177956	0.513358	0.54113	0.535121	0.53599	0.392523	0.611815	0.26482	NaN	NaN	NaN	NaN	0.117625	0.392206	0.443822	0.568797	0.38272	0.520805	0.602901
6.58277	0.350242	0.438018	0.52707	NaN	NaN	NaN	NaN	NaN	NaN	NaN	NaN	NaN	NaN	0.353032	0.312059	0.408446	0.424685	0.540649	0.438376	0.412247	0.503217	0.487072	NaN	NaN				0.38159	0.559092	0.388545	0.399136	0.40017	0.427688	0.502505	0.390167	0.520949	0.399154	0.469384	NaN	NaN	NaN	NaN	0.38131	0.592075	0.451418	0.570318	0.409775	0.513685	0.576288
6.67957	0.33453	0.423333	0.458059	NaN	NaN	NaN	NaN	NaN	NaN	NaN	NaN	NaN	NaN	0.403815	0.220152	0.42907	0.529384	0.530685	0.470944	0.366346	0.477572	0.448515	NaN	NaN				0.346221	0.547283	0.347865	0.667291	0.454126	0.439486	0.322379	0.4585	0.511698	0.489374	0.476142	NaN	NaN	NaN	NaN	0.499678	0.487692	0.475455	0.479718	0.49695	0.4865	0.536106
6.77638	0.34334	0.43736	0.44231	NaN	NaN	NaN	NaN	NaN	NaN	NaN	NaN	NaN	NaN	0.415982	0.167833	0.360742	0.663462	0.548413	0.54327	0.391277	0.4471	0.394888	NaN	NaN				0.285337	0.560651	0.461001	0.71419	0.475679	0.379182	0.463856	0.479293	0.624175	0.514433	0.342421	NaN	NaN	NaN	NaN	0.296115	0.443112	0.52368	0.463525	0.519505	0.399589	0.549276
6.87318	0.325888	0.439657	0.390143	NaN	NaN	NaN	NaN	NaN	NaN	NaN	NaN	NaN	NaN	0.414829	0.177071	0.308844	0.597218	0.597215	0.62477	0.447169	0.414685	0.367775	NaN	NaN				0.293476	0.562117	0.421604	0.569998	0.452609	0.435939	0.40661	0.388295	0.374691	0.458947	0.307698	NaN	NaN	NaN	NaN	0.271585	0.607452	0.5534	0.535321	0.545721	0.382166	0.567029
6.96999	0.30552	0.411489	0.367688	NaN	NaN	NaN	NaN	NaN	NaN	NaN	NaN	NaN	NaN	0.454747	0.242815	0.43753	0.572967	0.612047	0.61727	0.479203	0.398578	0.378788	NaN	NaN				0.316376	0.546261	0.408824	0.601748	0.553754	0.525711	0.36569	0.5097	0.496273	0.267875	0.475664	NaN	NaN	NaN	NaN	0.0516108	0.679652	0.549517	0.546671	0.584777	0.404955	0.543755
7.0668	0.319418	0.403974	0.403064	NaN	NaN	NaN	NaN	NaN	NaN	NaN	NaN	NaN	NaN	0.458893	0.282322	0.509091	0.523836	0.585008	0.563999	0.50344	0.429774	0.420516	NaN	NaN				0.303012	0.470711	0.456991	0.188425	0.421104	0.357826	0.315459	0.455146	0.348166	0.500046	0.481053	NaN	NaN	NaN	NaN	0.425172	0.457594	0.638737	0.538935	0.476501	0.456198	0.521097
7.1636	0.361163	0.391231	0.444429	NaN	NaN	NaN	NaN	NaN	NaN	NaN	NaN	NaN	NaN	0.459833	0.303772	0.448468	0.416039	0.576651	0.543007	0.49777	0.468474	0.455108	NaN	NaN				0.364981	0.444904	0.558758	0.174471	0.58817	0.472217	0.291003	0.528955	0.24753	0.412316	0.479285	NaN	NaN	NaN	NaN	1.28292	0.402322	0.633436	0.508106	0.424801	0.551964	0.506333
7.26041	0.384106	0.348465	0.413956	NaN	NaN	NaN	NaN	NaN	NaN	NaN	NaN	NaN	NaN	0.538863	0.269343	0.414604	0.49826	0.624176	0.448091	0.474598	0.442898	0.4297	NaN	NaN				0.461508	0.425018	0.6239	0.60201	0.453962	0.401881	0.339952	0.411548	0.363063	0.520349	0.431041	NaN	NaN	NaN	NaN	0.289629	0.491162	0.571949	0.504093	0.509426	0.4746	0.554153
7.35721	0.388106	0.351957	0.436074	NaN	NaN	NaN	NaN	NaN	NaN	NaN	NaN	NaN	NaN	0.526796	0.250831	0.351563	0.567172	0.607003	0.360771	0.441372	0.412298	0.411431	NaN	NaN				0.406871	0.381346	0.5256	0.619117	0.483558	0.372374	0.397123	0.477101	0.493941	0.420976	0.319276	NaN	NaN	NaN	NaN	0.13661	0.311063	0.536467	0.469085	0.643559	0.266349	0.581583
7.45402	0.364141	0.381517	0.490793	NaN	NaN	NaN	NaN	NaN	NaN	NaN	NaN	NaN	NaN	0.477056	0.192123	0.375701	0.499577	0.5368	0.402336	0.478191	0.374882	0.378596	NaN	NaN				0.361037	0.379189	0.438844	0.19938	0.489125	0.449287	0.428997	0.403599	0.437028	0.406022	0.378218	NaN	NaN	NaN	NaN	0.319604	0.0772095	0.603954	0.461851	0.566877	0.392931	0.568473
7.55082	0.325056	0.387477	0.504931	NaN	NaN	NaN	NaN	NaN	NaN	NaN	NaN	NaN	NaN	0.487373	0.149639	0.496914	0.415345	0.507741	0.484031	0.461424	0.410779	0.411707	NaN	NaN				0.389202	0.384242	0.447386	0.756778	0.445359	0.467637	0.477905	0.587311	0.534547	0.519233	0.382364	NaN	NaN	NaN	NaN	0.413813	0.278578	0.694415	0.524423	0.451985	0.433155	0.569229
7.64763	0.304058	0.335833	0.496179	NaN	NaN	NaN	NaN	NaN	NaN	NaN	NaN	NaN	NaN	0.458207	0.243423	0.522395	0.460172	0.501751	0.455622	0.385071	0.394766	0.393921	NaN	NaN				0.417721	0.366697	0.487981	0.218655	0.403644	0.420834	0.349936	0.348013	0.344001	0.522059	0.396836	NaN	NaN	NaN	NaN	0.265927	0.325813	0.62296	0.483476	0.500146	0.290673	0.56699
7.74443	0.272984	0.278369	0.417464	NaN	NaN	NaN	NaN	NaN	NaN	NaN	NaN	NaN	NaN	0.466217	0.263419	0.517236	0.466448	0.481891	0.457799	0.414614	0.383036	0.389531	NaN	NaN				0.449958	0.410258	0.476406	0.247656	0.484092	0.505391	0.426979	0.419671	0.393765	0.366316	0.428706	NaN	NaN	NaN	NaN	0.157376	0.344902	0.560638	0.390399	0.534294	0.295062	0.623675
7.84124	0.251083	0.311362	0.415461	NaN	NaN	NaN	NaN	NaN	NaN	NaN	NaN	NaN	NaN	0.41881	0.241961	0.401402	0.455893	0.424523	0.458239	0.385881	0.466139	0.455705	NaN	NaN				0.440155	0.401407	0.426292	0.299849	0.389738	0.408521	0.298698	0.382817	0.476671	0.372966	0.432966	NaN	NaN	NaN	NaN	0.366007	0.138846	0.49154	0.322031	0.584177	0.344796	0.695275
7.93804	0.271994	0.359786	0.3697	NaN	NaN	NaN	NaN	NaN	NaN	NaN	NaN	NaN	NaN	0.428669	0.232539	0.451706	0.502418	0.41999	0.368137	0.344071	0.422081	0.406988	NaN	NaN				0.424072	0.389583	0.422609	0.272208	0.303156	0.408316	0.37405	0.461882	0.279658	0.517823	0.398347	NaN	NaN	NaN	NaN	0.134284	0.237144	0.464481	0.31175	0.639855	0.40822	0.645218
8.03485	0.306506	0.331733	0.295669	NaN	NaN	NaN	NaN	NaN	NaN	NaN	NaN	NaN	NaN	0.463479	0.246073	0.458199	0.474315	0.419882	0.380295	0.387884	0.347963	0.340721	NaN	NaN				0.367802	0.406422	0.430277	0.472924	0.328357	0.404082	0.393485	0.41517	0.438049	0.478175	0.384997	NaN	NaN	NaN	NaN	0.0261766	0.0844138	0.575513	0.36166	0.561361	0.44715	0.602609
8.13166	0.311497	0.2956	0.309206	NaN	NaN	NaN	NaN	NaN	NaN	NaN	NaN	NaN	NaN	0.380715	0.273803	0.426674	0.338354	0.381361	0.404308	0.406323	0.361743	0.364654	NaN	NaN				0.306905	0.397848	0.433519	0.20561	0.347163	0.438505	0.405937	0.43647	0.364465	0.385922	0.381001	NaN	NaN	NaN	NaN	0.197265	0.186287	0.597057	0.378009	0.480902	0.395133	0.591673
[truncated: 4 more columns]
