# Supplementary material for: Distinct catecholaminergic pathways projecting to hippocampal CA1 transmit contrasting signals during navigation in familiar and novel environments
Source: eLife. 2024 Nov 6;13:RP95213. doi: 10.7554/eLife.95213 (PMC11540301; doi:10.7554/eLife.95213)
Supplement: Figure 3—source data 1. [file elife-95213-fig3-data1.xlsx]

## Sheet: Fig 3 aiii top
Figure 3 A iii top
	NET mouse mean lap velocity
laps from novel switch	1	2	3	4	5	6	7	8	9	10	11	12	13	14	15	16	17	18	19	20	21	22	23	24	25	26	27
-9	30.4875	18.555	NaN	33.7688	22.5626	22.5453	13.0317	25.1685	49.7654	17.309	19.7293	42.1579	17.496	15.8643	47.0372	13.2013	13.7379	9.02246	41.468	19.749	15.5812	17.3084	42.7648	41.4434	13.9181	16.7802	19.9116
-8	36.7168	22.8512	NaN	38.159	30.2889	31.3113	15.5619	30.0831	57.6994	19.5168	20.3605	42.9258	22.2978	18.1567	49.2155	11.8293	15.6733	8.74475	51.5352	17.8835	15.3432	16.7599	42.2022	35.0393	16.0719	18.7103	20.5409
-7	41.4699	13.8038	NaN	37.6266	34.1665	33.7808	20.0633	27.7827	38.8574	23.0417	20.458	37.1954	21.2805	19.6951	50.4459	11.2416	13.1149	9.04735	49.2305	18.2416	15.0711	14.8937	44.5559	41.396	12.6428	19.0533	20.3104
-6	37.8518	14.8255	NaN	37.1556	36.97	36.8705	20.9576	29.1663	36.9453	21.6702	18.1464	39.1658	24.0902	23.7082	43.1774	14.3883	13.5069	8.8946	53.9052	19.1546	14.4504	14.7545	54.196	38.6664	12.3284	19.1493	20.0222
-5	49.318	15.5768	15.6442	37.4709	38.1373	37.1202	17.3238	27.3993	37.2681	20.4277	19.5801	32.0737	20.076	19.9496	33.4179	14.7643	7.83641	8.30101	49.5763	19.5373	13.3239	12.9288	51.2441	41.3144	14.2693	19.4291	20.5005
-4	42.5901	15.2788	19.9304	39.3832	31.6642	33.5862	18.7776	26.165	30.0762	23.8123	24.8345	36.3724	20.5059	19.0289	42.429	14.1049	10.0938	7.49045	40.2588	19.1069	11.745	13.5957	46.0972	39.7003	17.2813	17.93	13.9921
-3	42.6128	18.2045	20.8773	38.378	39.1948	38.7254	23.6795	28.5698	68.5683	24.4871	17.5727	36.9058	23.1572	20.7039	38.8305	10.0686	12.4532	7.67532	52.3717	19.2566	11.417	12.8697	51.563	6.17616	10.6204	19.7288	6.74052
-2	38.9467	13.7797	33.3782	40.4637	42.1149	42.0856	22.6107	25.0183	31.7487	21.7295	21.2267	32.6586	18.5996	18.4665	46.3743	11.2928	10.3775	8.01207	54.4866	21.42	11.7575	12.2065	54.1297	37.2161	3.63282	18.5291	18.4224
-1	35.1765	17.9606	30.9671	38.5232	47.7746	47.863	22.2807	29.2233	40.5687	24.3535	21.7939	36.7948	22.3009	24.3156	53.2889	7.90453	11.1031	8.26905	53.8904	16.9333	32.8095	10.1869	48.4112	39.0334	10.932	15.0107	18.4614
1	15.9455	14.7621	9.223	26.7636	25.2542	25.1428	8.78578	16.3106	45.3565	11.8111	11.4953	15.918	13.1473	27.7348	41.5232	7.24853	8.43629	7.14753	27.7797	12.6567	8.43541	12.6222	12.5923	25.7317	9.75481	13.6799	11.539
2	25.7694	18.8006	11.8996	39.1995	46.1136	48.214	14.6937	18.3627	57.8539	19.2651	17.3455	23.4679	23.5398	38.0267	58.4131	8.3635	9.70564	8.36268	27.3013	19.2575	13.7515	14.6146	35.0482	23.4846	13.1288	12.6404	14.8457
3	32.5796	19.7879	11.5993	43.448	54.0595	52.1049	19.8685	17.245	71.927	21.8221	17.8659	29.3176	31.7284	45.8528	62.4897	10.0786	10.8225	9.1616	27.7993	21.9467	14.9402	14.7657	40.5912	26.1038	16.1338	14.9893	15.0821
4	41.5634	18.1344	12.3602	43.9293	54.9178	54.8945	19.5368	14.5569	52.9076	21.445	17.981	37.7033	28.7624	46.8864	41.1696	10.7193	11.7152	8.51623	22.0192	23.8383	16.4583	15.9675	47.6389	24.8526	14.8696	15.5795	14.6601
5	44.9496	15.1947	11.3718	45.394	58.3684	61.3548	22.6019	15.4877	57.1367	23.322	17.1521	35.3379	24.1603	42.0806	53.1866	11.7986	12.2974	8.73802	24.0846	23.0115	17.779	16.6069	49.9517	25.3036	16.3281	15.0021	16.2829
6	35.7323	16.8493	14.5322	39.4476	48.3037	47.1974	20.4515	18.1546	42.4205	22.3257	17.6458	42.8994	36.6932	50.5457	38.9692	11.8099	12.3995	9.49198	22.9731	21.4856	18.6711	14.428	44.698	35.0343	15.3256	16.141	14.6407
7	35.0634	15.3954	8.58353	58.7073	57.0166	54.9736	17.0823	18.1233	62.8105	21.6816	18.2075	46.2984	34.5742	52.9889	31.4985	11.2097	13.4697	9.70614	25.2246	21.7273	20.6586	13.0642	46.4417	28.292	16.2462	14.8561	13.5887
8	31.8038	13.6384	10.1612	44.4418	57.0915	55.9113	17.9011	21.0457	52.1427	22.906	14.7438	44.0327	35.7683	46.9574	34.2927	12.6827	12.902	10.1425	29.3446	28.0019	18.4101	13.8756	47.9863	27.7925	14.1134	17.7089	14.7376
9	39.874	14.4751	15.7541	57.6864	58.2965	62.5714	18.2294	18.9255	64.1176	21.8271	16.0356	41.8044	24.6794	47.5424	32.8653	13.1282	13.7651	9.70007	35.4891	27.7443	20.5244	14.276	46.4166	31.2787	17.239	20.7087	14.447
10	38.9396	14.7635	16.6897	39.2512	53.2184	55.814	19.7689	22.6524	57.0223	22.5875	14.1665	38.3377	31.1783	47.9128	38.1496	11.4726	14.2716	9.77734	33.8087	31.7787	18.2548	13.0993	42.2416	26.1922	18.3687	19.6341	17.6937
	DAT-Cre mouse mean lap velocity
laps from novel switch	1	2	3	4	5	6	7
-9	13.627	19.8072	NaN	34.3854	45.7122	11.8747	14.9913
-8	19.7696	13.8076	22.3442	35.8306	41.4145	17.2492	15.2074
-7	22.0453	24.9899	26.6825	35.2356	42.5947	13.1026	14.8471
-6	25.6814	22.5204	25.4293	33.9486	39.9098	16.4589	15.896
-5	27.6412	24.5231	22.6639	31.8143	26.5031	15.3377	15.2721
-4	21.6773	24.4218	23.8909	33.2204	38.103	16.382	15.0997
-3	32.5074	23.5481	22.1139	29.4053	43.8104	16.5911	14.1356
-2	33.1558	18.8414	20.2367	32.2945	35.024	16.5765	15.2681
-1	28.8178	13.0649	24.908	33.7768	38.8074	14.572	16.2774
1	7.75214	9.42268	6.53595	8.17382	9.83867	7.23608	12.9297
2	11.1842	14.1125	11.7721	16.823	14.8257	13.3539	11.204
3	13.2624	16.0612	14.7949	12.7582	20.6528	12.9365	13.4175
4	16.1545	17.1936	13.8847	24.0799	22.6294	9.80478	13.5214
5	19.735	21.4465	15.1383	23.4776	28.7204	9.76285	14.0973
6	19.3871	24.8508	15.7042	29.5226	30.0834	13.4292	13.5307
7	19.7311	23.1378	14.3344	17.4058	30.246	9.43477	14.2498
8	16.8791	22.2241	20.1653	36.4341	38.8455	15.1808	15.2519
9	18.2009	25.7985	15.087	30.126	25.2186	13.0996	19.5469
10	20.3767	25.7995	19.3366	26.4011	39.3593	13.0918	20.4856

## Sheet: Fig 3aiii bottom
Fig 3 aiii bottom
	NET-Cre mouse lap freezing ratio
laps from novel switch
-9	0.490741	0.288973	NaN	0.301471	0.426295	0.436508	0.240122	0.1875	0.367089	0.1133	0.0941176	0.791328	0.290698	0.515152	0.621145	0.370062	0.365196	0.576398	0.436364	0.235577	0.275618	0.53598	0.671171	0.673004	0.0619835	0.367893	0.217822
-8	0.338129	0.40824	NaN	0.282051	0.351515	0.378049	0.197761	0.45977	0.33	0.0777202	0.0898876	0.771772	0.356522	0.655932	0.729008	0.425764	0.361111	0.465438	0.2	0.3663	0.561135	0.497326	0.669565	0.700965	0.101852	0.333333	0.246305
-7	0.458065	0.305177	NaN	0.352941	0.396226	0.4	0.240741	0.155405	0.321429	0.0909091	0.0887574	0.731928	0.55942	0.524194	0.619318	0.446886	0.377261	0.536252	0.405172	0.221719	0.376147	0.534831	0.77707	0.700361	0.18	0.366412	0.25
-6	0.534759	0.286154	NaN	0.309524	0.425806	0.445161	0.447458	0.18797	0.411765	0.10596	0.0946746	0.737342	0.512281	0.568783	0.545455	0.17033	0.431683	0.683533	0.546667	0.388679	0.36036	0.50348	0.508475	0.816239	0.205696	0.558266	0.228856
-5	0.453125	0.242623	0.522459	0.234783	0.398601	0.377622	0.273438	0.114035	0.301587	0.1	0.0842105	0.749373	0.640091	0.665848	0.63285	0.287926	0.433054	0.877729	0.390476	0.256881	0.456471	0.676702	0.575342	0.787798	0.316109	0.483871	0.258537
-4	0.515152	0.208029	0.458472	0.286957	0.379518	0.406061	0.115578	0.154321	0.408163	0.0958084	0.179487	0.591928	0.254545	0.470199	0.486772	0.412935	0.646773	0.142857	0.354545	0.28821	0.470226	0.526749	0.592814	0.646809	0.593886	0.580336	0.382271
-3	0.462585	0.308244	0.686992	0.245614	0.481481	0.478528	0.19774	0.25	0.460784	0.10274	0.112676	0.7125	0.372197	0.449511	0.688	0.30791	0.662174	0.0754717	0.623188	0.25	0.68231	0.415138	0.756972	0.943662	0.812427	0.373541	0.786408
-2	0.447205	0.491018	0.709945	0.405797	0.457746	0.453901	0.18232	0.254545	0.466667	0.111888	0.159091	0.683007	0.301587	0.528302	0.540984	0.38961	0.570561	0.696945	0.483871	0.258706	0.691756	0.703535	0.736607	0.751412	0.902729	0.449838	0.346008
-1	0.423529	0.494898	0.6	0.297521	0.2	0.211765	0.163842	0.111801	0.502439	0.1	0.107595	0.674157	0.405738	0.488166	0.553459	0.357918	0.732824	0.324771	0.439655	0.268	0.177778	0.639248	0.584416	0.646341	0.563338	0.71725	0.375
1	0.298113	0.0846774	0.650589	0.122137	0.109489	0.10219	0.0852713	0.0892193	0.192771	0.0577617	0.0631579	0.105769	0.151079	0.107623	0.131034	0.137993	0.198113	0.0592105	0.171315	0.0627451	0.639296	0.610236	0.524793	0.269058	0.0584795	0.0811688	0.10101
2	0.232704	0.0638298	0.0586081	0.190476	0.394958	0.428571	0.0672269	0.088785	0.317073	0.0852273	0.0829016	0.278689	0.108844	0.111111	0.15625	0.554098	0.288744	0.0827068	0.111111	0.101124	0.405629	0.284457	0.12037	0.110294	0.0489796	0.0772358	0.103896
3	0.28777	0.0734463	0.189441	0.284404	0.367347	0.350515	0.076087	0.0714286	0.433735	0.0955414	0.0851064	0.301282	0.135593	0.144231	0.227848	0.304821	0.32549	0.0432277	0.195946	0.0955414	0.064257	0.0641026	0.15	0.122581	0.0761905	0.110727	0.0538117
4	0.315315	0.0812183	0.344737	0.283019	0.387755	0.383838	0.0710383	0.08	0.4375	0.0993789	0.0851064	0.291339	0.120968	0.228261	0.219178	0.262931	0.0969697	0.0745501	0.23494	0.10274	0.0630252	0.0946502	0.159091	0.206452	0.0921053	0.127119	0.0970464
5	0.311927	0.0762712	0.269755	0.303922	0.317073	0.353659	0.0931677	0.0970464	0.329412	0.108108	0.0820513	0.333333	0.107383	0.186047	0.173469	0.412078	0.0914826	0.0621622	0.203297	0.192771	0.142202	0.270758	0.1625	0.370558	0.125	0.223881	0.101852
6	0.296296	0.115556	0.398876	0.311475	0.282828	0.252525	0.0857143	0.12987	0.522013	0.0986842	0.0837696	0.319328	0.150943	0.183673	0.211765	0.0574324	0.0684932	0.0641399	0.25	0.157895	0.139423	0.44868	0.170455	0.183007	0.0723982	0.19697	0.0987124
7	0.294118	0.235915	0.77634	0.329412	0.348315	0.325843	0.0921659	0.071066	0.3375	0.0943396	0.0815217	0.353982	0.191667	0.229885	0.182692	0.319635	0.292105	0.0739645	0.263441	0.277778	0.196172	0.405634	0.174419	0.253968	0.0849057	0.264368	0.148148
8	0.275862	0.197232	0.500835	0.26	0.294118	0.285714	0.0895522	0.0871795	0.261364	0.0993377	0.164706	0.327586	0.2	0.211765	0.177419	0.267281	0.238532	0.109467	0.186667	0.136364	0.237209	0.412346	0.156627	0.180451	0.300319	0.309446	0.205993
9	0.406897	0.205674	0.515738	0.363636	0.367816	0.409091	0.0829016	0.169312	0.287671	0.0955414	0.0717703	0.333333	0.208092	0.147727	0.238095	0.189911	0.0918033	0.0735294	0.313725	0.333333	0.299213	0.604015	0.180723	0.304094	0.191304	0.29771	0.159533
10	0.353846	0.239726	0.412651	0.267857	0.336957	0.336957	0.18408	0.183099	0.376344	0.0980392	0.159533	0.340909	0.276596	0.179775	0.240876	0.0758621	0.258258	0.174026	0.366906	0.172131	0.258537	0.468137	0.189474	0.2	0.139303	0.297674	0.334586
	DAT-Cre mouse mean freezing ratio
laps from novel switch	1	2	3	4	5	6	7
-9	0.232323	0.689855	NaN	0.235294	0.333333	0.179245	0.100629
-8	0.134752	0.565341	0.122807	0.284091	0.348837	0.15493	0.0993377
-7	0.163793	0.595349	0.15	0.270588	0.358974	0.168421	0.0939597
-6	0.157407	0.788419	0.161905	0.211765	0.291139	0.142857	0.0915033
-5	0.25	0.675182	0.142857	0.213483	0.221154	0.135802	0.0839161
-4	0.270677	0.545455	0.140187	0.27957	0.333333	0.121622	0.0810811
-3	0.244898	0.505376	0.132743	0.168539	0.276316	0.202532	0.10596
-2	0.255556	0.610345	0.117647	0.35514	0.357895	0.123288	0.09375
-1	0.24	0.491909	0.148515	0.266667	0.296296	0.174419	0.1
1	0.329815	0.403361	0.0906344	0.468132	0.421053	0.16763	0.0858586
2	0.0788177	0.100629	0.0797872	0.153333	0.205882	0.14433	0.0872093
3	0.0909091	0.114865	0.0967742	0.103261	0.172414	0.252252	0.127778
4	0.116883	0.123188	0.0920245	0.144231	0.283465	0.129032	0.0909091
5	0.128	0.150442	0.0980392	0.147826	0.317757	0.246479	0.0982659
6	0.116788	0.183486	0.101351	0.170455	0.298077	0.119565	0.0981595
7	0.166667	0.142857	0.09375	0.137681	0.311321	0.269737	0.0961538
8	0.150327	0.185841	0.123967	0.207792	0.356322	0.0813953	0.131148
9	0.122137	0.164948	0.223464	0.181818	0.171717	0.316239	0.134454
10	0.142857	0.2	0.119048	0.169643	0.363636	0.0795455	0.138889

## Sheet: LC data for 3b and c
Figure 3b and c	LC axon fluorescence
time (s)	1	2	3	4	5	6	7	8	9	10	11	12	13	14	15	16	17	18	19	20	21	22	23	24	25	26	27	28	29	30	31	32	33	34	35	36	37	38	39	40	41	42	43	44	45	46	47	48	49
-97.0874	1.07463	0.705879	0.943617	1.04415	1.03618	1.09053	1.21961	0.881983	1.28875	0.980023	1.015	1.41109	1.13105	1.18629	0.894168	1.21199	1.30491	1.04906	0.785374	1.02644	0.980409	0.875032	0.831477	1.0488	1.23894	1.27906	1.11534	0.916317	0.966268	1.11509	1.10693	1.21566	1.12607	1.16114	0.880088	0.798665	1.31509	1.06683	1.03083	0.937493	0.802424	0.8262	0.580125	0.871227	1.11673	1.08258	1.06937	1.02151	1.10927
-96.9903	1.03303	0.802998	1.008	0.991523	0.959245	0.995251	1.16792	0.899515	0.930034	0.955838	1.12784	1.27923	1.07662	1.46525	0.856269	1.2987	1.41318	1.13367	0.704316	0.949102	1.04078	0.78136	0.771779	1.20061	1.22828	1.3356	1.1298	0.880453	0.98034	0.917227	1.21037	0.995084	1.03585	1.09239	0.841317	0.746775	1.00642	1.03476	1.02899	0.834559	0.897582	0.876188	0.430239	1.04949	0.94818	0.876164	1.07599	1.07498	1.07873
-96.8932	0.945655	0.759648	0.911857	0.962338	1.01301	1.06382	1.28336	1.14085	0.905152	1.04527	0.948267	1.39343	1.16046	1.01536	0.833203	0.910632	1.235	1.11736	0.708559	0.887658	0.85761	0.864652	0.826408	1.0441	1.00542	0.990892	1.20022	0.950555	0.875514	0.982816	1.1622	1.11145	1.17708	1.02244	1.16127	1.00963	1.20724	1.04601	1.05862	0.840342	0.818116	1.166	0.517844	0.840342	0.876735	0.99609	1.14034	0.94678	0.982715
-96.7961	0.835399	0.646063	0.735446	1.04885	1.07842	0.897593	1.14821	1.06302	1.19007	0.989186	1.00167	1.23847	1.2809	0.816409	0.863631	0.941343	1.35243	1.08537	0.70527	0.903949	0.801238	0.94688	0.870197	0.938935	0.864755	0.784561	1.22193	0.970756	1.00111	1.32375	1.06132	0.899641	1.04299	1.19919	1.22943	0.967655	1.33697	1.01488	1.01544	0.926507	0.827711	0.963963	0.572175	1.06226	1.01053	0.950034	1.11864	0.958618	1.12027
-96.699	1.1	0.790085	0.806457	1.04895	1.02922	0.81606	1.18629	0.803971	1.08501	0.952683	0.997991	1.20739	0.968368	0.751449	0.801507	1.19957	1.2625	1.04555	0.698215	0.959107	0.808266	1.02698	0.892306	0.936481	0.888497	0.854977	1.17622	1.01052	0.922767	1.08008	1.15377	1.12445	1.1895	1.40749	1.37383	0.71421	1.2068	1.06028	1.08761	0.881553	0.856698	0.828423	0.473022	0.908683	0.963363	1.03056	0.895693	1.02204	1.02484
-96.6019	1.20152	0.843021	0.875336	1.04826	1.129	0.89526	0.827855	1.01283	1.07729	1.02564	1.05274	1.27959	1.20886	1.18492	0.733928	1.45863	1.32803	0.897788	0.71352	0.983205	0.948226	1.06846	0.884336	1.00992	1.04283	0.96248	1.10983	1.00995	0.979849	1.11801	1.24459	1.28429	1.30632	1.13269	1.4275	0.864531	1.13453	1.15265	0.958262	0.842606	0.785987	0.664878	0.524477	1.16727	0.881509	1.1776	0.950276	1.05296	0.892272
-96.5049	0.976853	0.713782	0.939951	1.02834	1.06895	0.986219	1.0662	0.917881	1.02541	0.993235	0.925306	1.31123	0.994154	0.96172	0.875533	1.21149	1.12942	0.835651	0.708925	0.983494	1.00216	1.09063	0.861327	1.12132	1.26245	1.08853	1.13534	0.91903	1.12532	1.23612	1.37261	1.17898	1.25631	0.949254	1.31024	0.813257	1.20278	0.936646	1.02658	0.896878	0.783259	0.974048	0.520595	0.968621	1.05844	1.0221	0.96517	1.03938	1.10863
-96.4078	0.914057	0.726256	0.886676	0.891919	1.01214	0.966618	1.01418	0.813724	0.984215	0.99545	0.930333	1.4052	1.19202	0.872468	0.86103	1.38527	1.29607	0.944758	0.664528	0.936164	0.884046	0.891062	0.849497	1.01275	0.82951	0.739834	1.12218	0.896505	1.33274	1.13003	1.20773	1.30478	1.23852	1.06303	1.34628	0.85839	1.00226	0.935277	1.07937	0.936139	0.857824	1.16944	0.542003	0.990249	1.07788	1.26368	0.923571	1.02368	0.974282
-96.3107	0.932195	0.809588	0.774455	1.10248	1.08543	0.829589	0.840146	0.956367	1.00357	0.886724	1.2082	1.16504	1.29391	1.10972	0.786066	1.28311	1.30968	0.956439	0.770201	0.942724	1.06708	0.786396	0.894349	0.919732	0.622171	0.593455	1.08671	0.950451	1.29976	1.16074	1.40039	1.01933	1.27523	0.965237	1.31595	0.638641	1.13877	0.804947	1.06982	1.00992	0.918914	1.05842	0.589024	1.12916	1.09995	1.20193	1.08869	1.00988	0.834963
-96.2136	0.998888	0.759734	0.95354	0.88853	1.0319	0.8744	0.934166	0.992831	0.948874	0.948213	1.09593	1.28636	0.986195	1.07574	0.700484	0.950037	1.30768	0.919407	0.950909	0.976228	1.40068	0.871529	1.05256	0.857797	0.86603	0.851703	1.1179	0.995784	1.09862	1.27568	1.276	1.12302	1.19032	0.839562	1.2405	0.950547	0.950488	1.03625	1.15692	0.926622	0.891015	0.956639	0.534474	1.1285	1.00698	1.12521	1.09209	0.960308	1.14231
-96.1165	1.01777	0.762393	1.02546	0.938969	1.06608	0.915549	1.03249	0.980902	0.871069	1.14957	0.999347	1.37679	1.10242	0.95426	0.769198	1.11566	1.31519	0.842404	0.870229	1.04767	1.43877	0.965857	1.12203	0.897503	0.939482	0.862156	1.21773	1.01238	1.00954	1.33049	1.17642	0.925493	1.19761	0.874328	1.55612	0.714979	0.979418	0.901947	1.04549	0.958478	0.838293	0.999158	0.591613	1.05329	1.14948	1.16065	0.842342	1.00939	1.02291
-96.0194	0.941043	0.870078	0.883046	0.988991	1.02707	1.01867	0.853774	1.12783	1.09899	1.19317	1.23371	1.39512	1.27813	1.11761	0.786304	1.02352	1.37571	0.795079	0.811823	1.0903	1.30234	1.06478	1.14713	0.988029	0.927731	0.748711	1.23768	0.944977	1.08672	1.17297	1.22814	0.957787	1.14883	1.02388	1.07238	0.841809	1.31764	1.02395	1.02212	0.991861	0.863403	0.999294	0.517982	0.987545	1.14597	1.06618	0.854535	1.04777	0.950478
-95.9223	0.989792	0.838745	0.85623	0.896023	1.09571	1.01897	0.792807	1.11462	0.938554	0.866827	0.938397	1.25378	1.13521	0.946152	0.764789	1.11552	1.26097	0.807108	0.797966	1.07533	0.816882	0.920344	1.02908	0.962172	0.949616	0.837969	1.07522	0.937847	0.963103	1.10532	1.2994	0.978791	1.19417	0.96849	1.12766	1.02583	0.970821	1.07886	1.08373	0.962445	0.848948	0.844423	0.605449	1.18036	0.89771	1.01909	1.10095	1.05627	0.917833
-95.8252	1.10128	0.737903	0.887211	1.02488	1.07269	1.06919	0.818372	0.924748	1.08188	1.09419	1.04694	1.30563	0.946655	0.9591	0.726544	0.83786	1.14876	0.881119	0.747953	1.04434	0.825451	0.846185	0.957165	0.986043	0.977588	0.927242	1.09285	1.01867	0.909769	1.16654	1.18674	1.09442	0.996461	1.05401	0.809584	1.17226	1.07092	1.29566	0.9265	0.939593	0.846475	0.959281	0.623746	1.10973	1.11189	0.991208	1.02309	1.02899	0.845609
-95.7282	1.01709	0.904809	0.916827	0.935002	1.05029	0.997591	0.943455	1.19664	1.19433	1.21411	0.968049	1.2976	1.00487	1.29779	0.69193	1.1526	1.11845	0.986121	0.67986	1.00533	1.08103	0.912587	0.977517	1.10937	1.01774	1.01654	1.12218	1.04723	1.14501	1.34666	1.37578	0.899871	1.06008	1.02746	1.12979	1.05957	0.995766	1.03904	0.965415	0.935808	0.788948	1.06487	0.534586	1.20914	1.13651	1.00414	1.04334	1.03805	0.980754
-95.6311	0.954407	0.980061	0.898557	0.977494	1.04681	0.98646	0.920184	1.03639	1.21015	1.08002	1.1023	1.42433	0.899207	0.787115	0.774726	1.08175	0.907166	0.912695	0.959429	0.893287	0.996219	0.904145	0.983247	1.17199	1.04807	1.05497	1.03056	0.949282	1.12808	1.22483	1.29514	0.88853	1.05948	0.919685	0.986156	1.20468	0.899694	1.05431	0.939977	0.834889	0.815779	0.814359	0.656291	1.03637	0.891454	1.05901	0.9764	1.02032	1.07667
-95.534	0.93475	0.872004	0.784512	1.01857	1.00838	1.02771	0.815746	0.916792	1.24705	1.15288	1.05018	1.36109	0.840643	0.958041	0.976197	1.35034	1.11908	0.916633	1.05988	0.896376	0.940332	0.858281	0.981665	1.20425	1.07349	1.06795	1.13586	0.951735	1.12527	1.34907	1.32704	0.967476	0.903591	0.953702	0.823152	1.21802	0.715235	0.9751	1.03406	1.03101	0.847636	0.982504	0.642759	0.95763	0.962529	0.90749	1.05605	1.07856	0.988253
-95.4369	0.912809	0.853294	0.792506	0.943137	1.02339	1.11042	1.32512	1.03098	1.20302	1.08165	1.1403	1.37896	0.962939	1.19316	0.986142	1.15833	1.12608	1.0753	0.802088	1.12972	0.942294	0.942386	0.928091	1.06484	1.19603	1.2734	1.16241	0.993786	1.19954	1.10165	1.40073	1.03019	0.953425	1.02821	0.946853	1.02449	0.859363	0.739951	0.907546	1.05711	0.820333	0.724747	0.561464	1.09206	1.03427	1.17078	0.989717	1.11052	1.10848
-95.3398	0.889726	0.879257	0.861518	1.21147	1.16022	0.962217	0.823884	1.10817	1.08068	0.98826	1.03776	1.24851	0.935969	0.98223	1.09139	0.888823	1.18256	1.01969	0.792877	1.17333	1.07971	0.98563	0.887333	1.00274	1.25417	1.3885	1.19931	0.867059	1.0632	1.21458	1.03404	1.08362	1.13867	0.949139	0.855776	1.08736	0.95065	0.869631	0.986249	1.02493	0.814177	0.691898	0.649758	1.17144	0.993562	0.875758	1.05468	1.01357	0.88156
-95.2427	0.856492	0.811229	0.893208	1.02709	1.08292	1.16404	1.00952	0.990625	1.06293	0.949874	0.946227	1.30046	1.12336	0.837597	1.20571	1.21701	1.12941	0.856957	0.907955	1.12208	1.28486	0.947153	0.872206	1.09524	1.18352	1.32291	1.11116	0.983267	0.904025	1.28871	1.16168	1.02096	1.00848	1.00752	0.986469	1.15316	0.966998	0.922123	1.04216	1.00976	0.783559	0.826853	0.593838	0.959549	1.07001	1.06876	1.06985	0.98448	1.10201
-95.1456	0.841497	0.768118	0.947034	0.97911	1.03901	0.945897	0.990806	1.14294	0.982142	1.01217	1.03865	1.28864	1.05939	1.56422	1.17056	1.27024	1.07127	0.902593	0.785779	1.00823	1.17507	0.905119	0.899073	1.02282	1.12178	1.21509	1.20117	0.975533	0.859899	1.19045	1.22097	1.32727	0.968762	1.01242	0.905153	1.03667	0.902642	1.16467	0.908685	0.966803	0.842372	0.943882	0.684771	1.2475	1.0077	0.890267	1.01957	1.09801	0.934194
-95.0485	0.862981	0.774842	1.04513	1.01627	1.01483	1.20479	1.05683	0.959702	1.13253	0.965944	1.13092	1.35314	0.914399	1.05625	1.20024	1.33171	1.20296	0.943057	0.75039	0.939307	1.16858	0.861306	0.946939	0.867948	1.0645	1.08615	1.1801	1.01995	1.08607	1.05817	1.40745	1.06789	1.01421	1.04771	0.706654	0.891279	1.04985	1.01364	1.00501	0.965381	0.886405	0.932326	0.635348	1.37474	1.22213	0.853463	1.12082	1.04398	1.16792
-94.9515	0.935732	0.771264	0.994994	0.96988	1.07533	0.981228	0.918141	0.99547	1.10005	1.03903	1.32676	1.39343	1.13547	0.745181	1.0703	1.08954	1.07315	0.973175	0.888572	0.960224	1.36871	0.788703	0.776398	1.05653	1.19719	1.24694	1.07978	1.06873	0.73743	1.39376	1.17252	1.10628	0.898101	0.940788	0.756945	0.823342	1.06706	0.907222	0.896966	0.892604	0.885636	0.713064	0.618631	1.04607	0.945606	0.862842	0.957103	1.04542	1.06953
-94.8544	1.03412	0.762537	0.870746	0.886753	1.15166	0.860759	0.878653	0.942523	0.930555	0.992804	1.10272	1.50735	1.18072	0.932425	1.08336	1.06247	1.41059	0.986294	0.999926	0.917602	1.24293	0.751871	0.717699	1.12232	1.2227	1.27307	1.1811	1.04739	1.05671	1.05457	1.28797	1.31464	1.09546	0.881279	1.13991	0.910686	0.877392	0.897866	0.91072	0.798324	0.800307	0.761377	0.657835	1.28478	1.06437	0.922558	1.31246	1.00302	1.07447
-94.7573	1.05449	0.677237	1.02252	0.848289	1.08145	1.10189	1.23964	1.12457	1.16731	1.12901	1.31151	1.38764	0.927644	1.15853	1.14737	1.22186	1.22759	0.990913	1.09787	0.843212	0.954204	0.786585	0.882688	0.94253	1.03388	1.02988	1.15308	1.14744	0.928506	1.17958	1.32164	1.34861	1.01119	0.808412	1.00335	0.949988	0.810718	0.973965	0.92608	0.955413	0.78586	0.845518	0.619811	1.08401	1.03338	0.846047	0.934883	1.00557	0.992084
-94.6602	1.05781	0.674897	1.08462	1.0168	1.1383	1.02334	1.02488	1.18791	1.15915	0.937849	1.16436	1.32915	1.13748	0.891771	1.18289	1.0376	1.27353	0.921315	1.09518	0.87586	0.986608	0.839669	0.988273	0.841857	0.958449	0.923325	1.1031	0.994828	1.20124	1.11322	1.25216	1.07573	1.00476	0.878691	0.995463	0.829515	1.08781	1.02045	1.01304	0.856795	0.817517	0.893987	0.695698	1.14466	1.02096	1.12458	1.08573	1.08905	1.23526
-94.5631	1.027	0.838477	0.967381	1.05118	1.08364	0.892115	1.10267	1.01604	0.833749	1.00365	1.04374	1.36709	0.969571	0.788762	1.19524	1.21614	1.44343	0.873731	1.09451	0.901183	0.981503	0.901939	1.06416	0.780742	0.939711	0.885097	1.05881	1.00195	0.868025	1.32536	1.27612	1.17578	1.07723	0.885968	1.11371	1.05835	0.864146	0.943329	0.938854	0.955853	0.851523	0.71658	0.59937	1.12088	1.05837	1.07764	0.958956	1.05257	0.945812
-94.466	1.17023	0.890779	1.00809	1.09502	1.12205	1.00619	1.06803	1.23659	1.15004	1.06542	1.23186	1.48727	1.04206	1.38954	1.08765	1.00004	1.3056	0.870175	1.09785	0.911858	0.901379	0.937442	1.10463	0.915759	0.763148	0.714929	1.1813	1.05009	1.2105	1.19956	1.26537	0.912525	0.957815	0.859495	1.08829	1.05814	1.06637	0.904716	0.873829	0.944662	0.789368	1.06096	0.738057	1.01269	1.04543	0.873908	1.22464	1.03679	1.0025
-94.3689	1.40049	0.887442	1.12776	1.16759	1.06397	1.12339	0.901034	1.08072	1.36162	1.03411	0.932469	1.46804	0.955227	1.07269	1.0187	0.910133	1.00343	0.856321	0.954272	0.871543	0.911514	0.975393	1.11932	0.976915	0.69513	0.654669	1.20651	1.12855	1.06207	1.31355	1.07532	1.41917	1.01477	0.898615	0.88149	0.872057	1.24466	0.894158	0.978511	0.888349	0.799714	0.834754	0.540231	1.25911	1.20797	1.1801	1.08199	0.982418	0.969755
-94.2718	1.40694	0.853015	0.962884	1.27197	1.12938	0.929872	1.32163	0.83825	1.12425	1.11442	1.14823	1.34666	1.0942	0.993971	1.00309	1.4305	1.30216	0.837318	0.737243	0.805733	0.96678	1.01824	1.08244	0.890346	0.844201	0.814227	1.20599	0.998529	0.961256	1.10411	1.12144	1.1441	0.903889	1.01253	0.967643	1.11028	0.972971	0.877909	0.966313	0.799536	0.758916	0.879275	0.633514	1.22502	1.29071	0.884135	1.05497	1.07798	0.872608
-94.1748	1.39315	0.854571	0.935369	1.16801	1.03975	0.881833	0.95723	0.892413	1.06961	0.925921	1.02142	1.34151	0.930123	0.596193	1.01678	1.42002	1.20897	0.882337	0.821221	0.704083	1.03305	0.981831	1.04134	0.91828	1.00083	0.973089	1.10606	1.04521	1.04526	0.989414	1.17873	1.13411	0.939351	1.03013	0.893321	1.08004	1.06836	0.709989	1.02463	0.894104	0.840261	0.981507	0.651363	1.05219	1.0534	1.14285	0.958678	1.0396	1.02065
-94.0777	1.3389	0.928095	1.18258	1.17595	0.962435	1.07856	1.04265	0.96596	1.08254	0.938797	0.857656	1.35624	0.89162	1.15806	1.02131	1.10218	1.13518	0.879443	0.852873	0.709183	0.972586	0.90579	0.998128	1.00347	1.16124	1.1316	1.06589	1.0643	0.919944	1.12691	1.25597	1.1017	0.993694	0.953013	0.954446	1.17797	0.800294	0.855993	1.16437	1.13209	0.949089	0.845775	0.616259	1.27336	1.1325	0.927136	0.9675	0.942918	0.988606
-93.9806	1.44097	0.89072	1.26249	1.0131	0.950909	0.953394	0.790901	1.06135	1.18083	1.21176	0.924334	1.424	0.968678	0.993766	0.945404	0.884286	1.26266	0.780723	0.77987	0.927785	0.658645	1.02899	1.03294	0.985173	0.948659	0.957458	1.09401	1.05434	1.00346	1.00977	1.1433	1.03366	0.996052	0.96845	1.07884	1.22038	1.03299	0.912669	0.989717	0.921955	0.887156	0.888308	0.547994	1.15041	0.867916	0.976553	1.01095	1.01947	0.923832
-93.8835	1.62119	0.797895	1.25874	1.14884	1.04167	0.896213	1.12343	0.983875	1.08318	1.23158	0.961772	1.56076	1.05536	1.14089	1.00886	0.990769	1.12078	0.784893	0.786835	0.995088	0.636502	1.07061	1.07105	1.02761	0.910366	0.942407	1.05402	1.16284	0.78659	1.18595	1.12607	0.86007	1.09593	0.938351	0.998403	1.22222	1.2409	0.9657	1.04105	1.03332	0.803589	0.882995	0.517846	1.31366	1.19602	1.00019	1.07865	1.0284	0.942268
-93.7864	1.43406	0.732185	1.10017	1.12503	1.07775	0.905954	0.825984	1.06523	1.17741	1.0439	1.09687	1.43886	0.96708	1.40485	0.970069	1.06462	1.18474	0.840508	0.833785	0.986742	0.76026	0.949059	1.11576	1.1915	1.22065	1.24554	1.16744	1.09623	1.0663	1.09783	1.07098	1.12171	1.023	0.973319	1.08462	1.08768	1.06686	0.896217	0.95916	0.985221	0.790424	0.778281	0.551825	1.03772	1.25519	1.14923	1.00984	1.00896	0.982236
-93.6893	1.29664	0.742651	0.968392	1.00946	1.12477	1.0263	0.973494	0.912689	0.856443	1.07576	0.828635	1.44094	1.0389	1.09745	0.864174	1.13527	1.33074	0.909034	0.894252	1.09732	0.873555	0.869702	1.0841	1.02227	1.13424	1.15212	1.10672	1.06375	0.959045	0.983424	1.09881	1.28182	1.00264	1.02049	0.907756	1.08476	1.00068	1.06209	1.08716	0.957689	0.808388	1.10644	0.54661	1.14563	1.12598	0.998231	0.924393	1.05888	1.05345
-93.5922	1.25864	0.905469	0.89021	0.839576	1.11334	1.0286	1.21614	0.955866	0.838138	1.0604	1.04383	1.43079	0.99869	1.15575	0.840872	1.15235	1.14126	0.932249	0.883153	1.17744	0.911741	0.811441	1.01425	0.686467	0.849488	0.860417	1.07743	0.95858	0.972285	0.952481	1.08308	1.24363	1.08528	0.951206	1.13237	1.19731	0.912552	0.790861	0.99953	1.08816	0.84636	0.781619	0.558053	1.17812	1.1808	1.00491	1.03596	1.03397	0.836342
-93.4951	1.27857	0.869867	1.00024	1.09147	0.95027	0.890403	1.27857	1.06159	1.14081	0.910192	1.00832	1.39148	0.981801	1.31677	0.832624	0.930729	1.15553	0.864845	0.72892	1.19666	0.799709	0.771908	1.07806	0.796282	1.18946	1.15293	1.16279	0.782202	0.858789	1.24512	1.0153	0.895116	1.02835	0.930714	0.870932	0.938095	1.15258	0.866867	0.893711	1.11355	0.841565	0.760033	0.582066	1.14887	1.17447	1.13593	1.06886	0.988891	0.943359
-93.3981	1.32748	0.735057	1.20438	1.00939	1.03466	1.00969	1.1519	1.04064	0.802991	0.938702	1.06668	1.43574	1.13273	1.2033	0.830758	0.765762	1.06187	0.868796	0.744956	0.940205	0.887155	0.769742	1.0656	0.831547	1.30612	1.26371	1.19961	0.991554	0.988566	0.994406	1.15939	1.10271	0.978855	0.986367	0.870386	0.91823	0.887874	0.823556	0.990186	0.751901	0.838356	0.934679	0.656805	1.10245	1.31831	1.12584	1.08276	1.03176	1.10306
-93.301	1.32113	0.786427	1.07706	1.14634	0.968827	0.781149	0.696461	0.889666	0.982269	0.991525	0.825037	1.46176	1.08655	0.917359	0.852879	0.912863	1.22761	0.908426	0.846125	0.545906	1.07434	0.84231	0.90059	0.717712	0.976157	1.01104	1.22018	0.950282	0.875023	1.11814	1.32052	1.11837	0.993634	0.929633	0.861043	0.978985	0.808835	0.935231	1.1426	0.850432	0.843157	1.02918	0.606074	1.18809	1.20287	1.00542	1.15068	1.09799	1.06319
-93.2039	1.33653	0.815715	1.02281	1.02919	1.04932	0.805305	0.986469	0.854985	1.11267	1.05223	1.08536	1.37826	1.1413	1.07367	0.780691	0.979018	1.1377	0.919283	0.845252	0.938852	0.808095	0.824127	0.868307	0.704854	0.908586	0.945478	1.22527	0.917037	0.920921	0.955186	1.05176	0.99401	0.935587	0.940539	0.94177	1.03618	1.10263	0.865043	0.990484	0.860778	0.798795	0.873576	0.634258	1.0752	1.14174	1.27816	1.20637	1.03952	1.08286
-93.1068	1.39544	0.800838	1.11469	1.05536	1.06155	0.854812	0.804916	0.854339	1.04816	1.04299	1.05799	1.45673	1.05288	0.849044	0.788573	1.00969	1.06183	0.94118	0.84994	1.15494	0.711553	0.760569	0.902387	0.742485	0.972211	0.97346	1.22501	1.14124	0.798547	0.917168	0.984907	1.08171	0.993281	0.933538	1.02421	1.09302	1.02245	0.948377	0.921175	0.830212	0.831544	1.0629	0.732656	1.2372	1.11261	0.941684	1.20408	0.871557	1.13062
-93.0097	1.24944	0.742072	1.01909	1.02255	1.03415	0.939818	0.723247	0.88528	0.882937	0.87875	0.989146	1.22627	0.868318	1.24556	0.780723	0.929961	1.08638	0.985157	0.865747	1.0173	0.954417	0.936015	0.892836	0.850707	1.02933	1.06159	1.17955	0.924595	0.727464	0.980996	1.1988	0.959483	0.968693	1.07053	0.837658	0.788243	1.0186	1.00514	0.818874	0.830133	0.749366	0.91883	0.617327	1.11515	1.32808	1.07091	1.27047	0.982262	0.97294
-92.9126	1.00097	0.661361	0.829746	1.11468	1.06986	1.03363	0.864524	0.836787	1.10665	0.963905	1.1575	1.3712	0.936545	0.970107	0.796651	1.24976	1.07962	0.962762	0.883406	1.05204	0.931397	1.00123	0.867604	0.903315	1.08812	1.12692	1.20734	0.929783	1.09337	1.20131	1.05253	1.22499	0.868655	0.897658	0.815199	1.04689	0.818248	0.900918	1.0158	0.969764	0.888074	0.910667	0.851368	1.20515	1.21402	0.966672	1.06961	0.977596	0.994466
-92.8155	1.00561	0.771957	0.998487	0.827914	1.01488	1.00864	1.03044	1.04827	1.1139	1.02383	1.00716	1.28454	0.871851	1.06364	0.730099	1.07033	1.02488	0.907182	0.901991	1.17297	0.775436	0.845974	0.811009	0.844695	1.15023	1.14669	1.29186	1.00297	0.893562	1.03512	1.20143	1.10215	0.878668	0.896198	1.2686	1.1003	0.874227	0.908673	0.867704	0.936097	0.763712	1.12248	0.72192	0.977664	1.15795	0.805158	0.999372	1.04267	0.978531
-92.7184	0.998164	0.838052	1.03688	0.908139	1.02396	0.979895	0.631055	0.840035	0.927398	0.898708	1.12754	1.27645	0.92762	1.14484	0.738466	0.824802	0.962569	1.03761	0.944305	1.15368	0.749267	0.715601	0.867367	0.851228	1.07976	1.05835	1.1931	0.947074	0.886954	1.14986	1.10839	0.812584	0.953797	0.980393	0.928259	1.0888	0.947046	1.00115	0.961505	0.949292	0.780251	0.858146	0.791627	1.12156	1.28534	0.719934	1.04546	0.950609	1.06433
-92.6214	0.966564	0.815147	0.814577	0.75383	1.07638	1.00151	1.08644	0.999601	1.10021	0.967043	1.14944	1.47619	0.970973	0.924127	0.733706	1.04368	1.10111	1.09454	1.01279	1.19341	0.739001	0.597669	0.980201	0.890337	0.942999	0.915966	1.24991	0.995741	0.799925	1.23719	1.29267	1.16837	0.949547	0.851493	1.04436	0.904157	0.991706	0.898057	0.901568	0.977493	0.82292	0.648742	0.761486	1.10874	1.48046	0.871543	1.0193	1.00981	1.25522
-92.5243	0.957031	0.825526	0.771084	0.840275	1.12074	1.0328	0.873677	0.952766	1.01399	1.17699	1.07492	1.29891	1.09409	1.24114	0.782677	0.863131	0.894909	1.00444	1.13363	1.35121	0.760541	0.79574	0.967546	0.955727	0.868667	0.82325	1.32168	1.00529	1.13851	1.24382	1.28773	0.781159	1.01773	0.984456	1.27375	1.09821	1.00467	0.805279	1.0783	0.933074	0.749418	0.681142	0.594917	1.08201	1.39293	1.1728	1.20349	0.962505	1.09107
-92.4272	0.958531	0.852548	0.816996	0.893915	1.05701	1.00799	0.946046	0.971376	1.12407	1.09013	1.18484	1.30106	0.89726	0.667758	0.706231	0.958807	1.10292	0.986817	1.20116	1.26433	0.786552	0.881906	0.988667	0.967667	0.943534	0.87378	1.21364	1.03343	0.840639	1.20108	1.18637	0.950766	0.940719	0.873852	1.14185	1.26469	1.04139	0.916493	0.961659	1.05327	0.811805	0.866493	0.621397	0.991077	1.43318	0.998165	0.99526	1.06153	1.03475
-92.3301	1.07117	0.78345	0.921141	0.957453	1.00678	0.928502	1.03099	0.939464	1.09385	1.00825	1.13263	1.34437	0.843234	1.15689	0.751256	0.877168	0.8572	1.00543	1.24202	1.05511	0.814799	0.744259	1.07734	0.872709	1.3168	1.2108	1.14137	0.915452	1.05555	1.16058	1.19282	1.15522	0.932809	0.800643	0.886687	1.06299	1.03424	0.999174	0.960792	1.01534	0.793257	0.689319	0.589278	1.15505	1.0307	1.24722	0.879374	0.972947	0.995047
-92.233	1.10148	0.734907	0.968259	0.878186	1.09234	1.04023	1.10743	0.97115	0.830384	1.15032	1.02645	1.23611	0.894019	0.812319	0.694319	0.926248	0.856623	1.01041	1.07297	1.02456	0.949552	0.724418	1.05717	0.844994	1.06689	0.995216	1.21543	0.902905	0.947798	0.968738	1.07542	0.773379	0.936998	0.969277	0.815489	0.928339	0.900742	0.920404	1.06553	0.899442	0.819009	0.810365	0.579436	0.92397	1.36383	0.957181	1.29294	0.984221	1.00868
-92.1359	0.967129	0.727472	0.90132	0.881379	1.04475	0.933751	0.82781	0.996579	0.974447	1.07109	1.08745	1.29235	1.0485	0.906441	0.685273	1.06579	0.841177	1.00795	0.99144	1.11207	1.0658	0.763478	0.982565	0.850899	0.505398	0.503328	1.31908	1.00339	0.792958	1.07718	1.19445	0.962414	0.901061	0.899004	0.976304	0.890211	0.888244	0.951442	1.10275	1.08011	0.806822	0.908215	0.746817	1.29109	1.13402	0.979524	0.907493	0.976453	1.01619
-92.0388	0.985883	0.718682	0.97195	0.634656	1.01222	0.994613	1.03407	0.840486	1.19709	1.08557	0.910313	1.28458	1.0477	0.927187	0.714837	1.25143	1.0512	0.99061	1.08497	1.43567	1.14502	0.687849	0.905279	0.916688	0.741545	0.828398	1.22171	0.986455	0.899723	1.00236	0.972867	1.19175	0.917679	0.955677	0.88635	0.811245	0.955642	0.916817	0.982422	0.824457	0.790502	0.911579	0.539751	1.17847	0.927528	1.05084	1.00265	1.10368	1.06369
-91.9417	1.08119	0.709214	1.11136	0.791987	1.02497	0.86543	1.06898	0.921205	1.09516	1.01563	1.04993	1.2825	0.96721	0.944563	0.777362	0.832858	0.965613	1.02807	1.0251	1.38046	0.990793	0.693099	0.85685	0.872976	0.920712	1.03156	1.31328	0.991939	0.97268	1.01912	1.06289	1.09414	0.895884	0.924437	1.00769	0.990643	0.946723	1.00421	0.813059	1.10431	0.852175	0.802463	0.818093	1.06803	1.11025	0.964623	1.28147	1.05208	1.13065
-91.8447	1.00304	0.719122	0.850105	0.875031	1.13054	0.91934	0.776498	0.863295	1.15106	1.11786	0.978734	1.27375	1.09311	0.938869	0.856838	1.03421	0.945926	1.09293	0.888525	1.13584	0.719837	0.860109	0.866137	0.610259	0.98592	0.990917	1.29952	1.02631	0.824149	0.98934	1.3674	1.0922	0.913331	0.898494	0.71829	0.866729	1.04774	0.807435	0.999497	0.89266	0.769324	0.624653	0.715687	1.13265	0.957927	0.892623	1.22388	1.05839	0.920548
-91.7476	0.994811	0.705492	0.754384	0.85812	1.03049	0.915003	1.08732	1.01204	0.900141	1.01849	1.00279	1.27732	1.01385	0.888888	1.00551	0.919054	0.866757	1.07677	0.987706	1.12177	1.13816	0.817847	0.944923	0.605629	1.10186	1.08572	1.35089	0.887576	1.00819	0.976111	1.02294	1.11744	0.848987	1.03478	0.990821	1.11135	1.15154	0.952523	0.879497	0.989929	0.908409	0.861209	0.634154	1.01109	1.00819	1.04536	0.932913	1.0082	1.10231
-91.6505	1.12643	0.644783	0.989739	0.845828	1.08822	0.943079	0.732673	1.08566	0.823527	0.940166	1.11006	1.40808	0.953245	1.11589	1.16533	1.03325	1.05631	1.08484	1.03727	1.10314	1.30478	0.670948	1.05846	0.730042	1.24317	1.24824	1.21662	0.878438	0.922822	1.01942	1.12397	0.983818	0.863621	0.881235	0.843031	1.28098	1.06601	0.964966	0.909453	0.896422	0.828488	0.916706	0.605542	1.01018	1.2055	0.839105	0.929295	0.982226	0.945063
-91.5534	1.1362	0.755849	1.10146	0.799172	1.05871	1.00157	0.746585	0.976979	0.964694	1.04716	1.14504	1.30771	0.895146	0.983319	1.31437	0.952115	0.947464	1.14134	0.987579	1.0754	0.968013	0.745573	1.00648	0.767623	0.998763	1.0054	1.25532	0.853025	0.871995	1.05869	1.19143	0.94602	0.923289	0.92796	0.946482	0.918896	1.09178	0.930486	0.90149	0.996793	0.796004	0.967962	0.609658	1.01281	1.12678	0.981295	1.0307	1.00921	1.10638
-91.4563	1.08505	0.952802	1.15137	0.762514	0.997973	1.03514	1.11652	0.935185	0.941976	0.96781	1.12573	1.33382	0.952636	0.830901	1.26545	1.01425	0.948383	1.11342	1.05623	1.02179	1.05242	0.790312	0.987998	0.824057	0.810994	0.831792	1.28505	1.04792	0.985412	1.05238	1.05998	0.907907	1.0094	0.963321	0.954516	1.1877	1.11579	0.928927	0.936452	0.967265	0.83877	0.772963	0.646991	1.07832	0.990017	0.938926	0.998098	0.997457	0.976385
-91.3592	0.966029	0.867603	0.817269	0.913497	1.03096	1.05924	0.894539	0.89456	1.06766	1.02038	1.30938	1.34857	0.961035	1.06107	1.32866	0.792281	0.914237	1.04329	1.18405	0.955249	1.3474	0.775279	1.0365	0.918195	0.736501	0.796646	1.27675	0.870311	1.15576	1.00929	1.15485	0.937858	0.965548	0.863468	0.807374	1.05459	1.01891	1.00104	0.968094	0.885712	0.785901	0.98738	0.585345	1.0307	1.0074	0.998371	0.899161	1.08467	0.911657
-91.2621	0.896901	0.793682	0.627674	0.756128	1.07165	1.09229	1.01158	1.0916	0.983828	0.945068	1.00927	1.32735	1.16635	0.763999	1.36933	0.757703	0.895319	1.0266	1.31727	1.16611	1.34535	0.808549	0.981896	0.918214	0.704071	0.723273	1.26883	1.03232	0.971729	1.13693	0.935085	1.33563	0.84687	0.779683	0.884845	0.813595	0.972361	0.876918	1.02038	0.980502	0.753364	1.01511	0.54609	0.960438	1.01071	1.04207	1.07957	0.993046	1.07622
-91.165	0.92756	0.742315	0.727098	0.731059	1.06194	0.969192	0.877444	1.4491	1.21857	1.21975	1.11864	1.25803	1.19363	1.16363	1.39701	0.999442	0.837389	1.06242	1.4088	1.25164	1.19778	0.86597	0.875745	0.871174	0.692673	0.630786	1.15859	1.0591	1.04544	1.11058	1.11384	0.897017	0.976388	0.822782	0.843841	0.87692	0.874769	0.879121	0.829345	0.919711	0.875292	0.957008	0.598481	1.07141	1.1428	0.985924	1.09531	1.0405	1.03903
-91.068	0.976718	0.766062	0.844264	0.8549	0.970793	0.980981	0.915163	1.09774	1.13723	1.16607	1.06813	1.30647	1.08072	0.790484	1.34677	0.795435	0.808597	1.20328	1.41693	1.08648	0.759198	0.832412	0.976276	0.693638	0.776114	0.741029	1.10872	1.01486	0.913655	1.01339	0.929574	1.14474	1.00023	1.00693	0.81462	0.943169	0.829072	0.871211	1.04476	0.966254	0.871728	1.09393	0.606763	0.963784	1.00543	0.842013	0.920104	1.01699	1.06263
-90.9709	1.03513	0.827367	0.970301	0.739138	1.11154	0.898911	1.0458	1.09083	0.909146	0.996595	1.14079	1.31165	0.890931	0.948786	1.22442	0.879784	0.969508	1.14442	1.34826	0.991177	0.873933	0.815717	0.986357	0.713596	0.844118	0.837134	1.14574	0.975314	0.910468	1.03056	1.09828	0.954891	0.847687	0.926014	1.03217	1.01723	0.935055	0.95602	0.955913	1.13984	0.861984	0.894284	0.672405	1.09627	1.15704	1.23265	1.07145	1.09784	1.03664
-90.8738	1.04753	0.873072	1.05507	0.776864	1.01075	0.98191	0.922296	1.07589	1.08667	1.08091	0.890066	1.3742	1.00407	1.11478	1.33914	0.905093	0.980719	0.985702	1.24118	0.930792	1.26533	0.832749	0.815538	1.12854	0.881249	0.904959	1.14055	1.00363	1.17389	0.968596	1.06639	1.02985	0.848497	0.909779	0.949052	1.13836	1.06939	0.871545	0.882977	0.956874	0.868089	0.944497	0.585399	1.1779	1.0011	0.875669	0.918714	1.09152	1.01291
-90.7767	1.0926	0.936438	1.03491	0.902333	1.08	1.09777	1.06079	0.985816	0.994589	0.847234	1.17921	1.24656	0.925605	0.762602	1.45784	1.08594	0.795683	1.07237	1.29559	0.895137	1.1156	0.84978	0.644719	1.54349	0.91838	0.972785	1.04103	0.95566	1.07762	0.849235	1.14921	0.980522	1.10567	1.00168	1.16971	1.10579	1.10393	0.900992	1.04266	0.885382	0.814249	0.74924	0.609855	1.1018	1.01623	0.915898	1.0526	1.00186	1.03942
-90.6796	1.20299	1.03513	0.804858	0.846609	1.021	0.974396	1.04473	0.816421	1.09699	1.00663	1.07063	1.33057	0.870203	0.948331	1.34887	0.81807	0.825332	1.09582	1.30838	0.875277	1.11209	1.58559	1.62223	1.15034	1.83801	1.83073	1.08924	0.912356	1.17195	0.932055	1.1133	1.14203	0.980487	0.975817	0.781151	0.79215	0.885182	0.97556	1.05983	0.849069	0.845939	0.811365	0.651672	1.01491	1.26252	0.901252	1.06724	0.937374	0.900844
-90.5825	1.13985	1.11881	0.991306	0.733655	1.16926	1.13562	1.08538	1.08893	1.04312	0.942049	1.00414	1.41458	0.80093	1.27628	1.33045	1.11581	0.860399	0.99285	1.23789	0.88701	1.40101	1.3634	1.49858	1.29512	1.52494	1.56057	1.01129	0.872745	1.1044	1.11633	1.1729	1.01119	0.913682	0.974105	0.879972	1.05593	1.23355	0.772085	1.04483	0.980381	0.820042	1.03554	0.671055	1.36704	1.07047	0.940227	1.02246	1.20792	1.15149
-90.4854	0.989941	1.19498	1.386	0.736442	1.04958	1.01991	1.23694	0.925376	0.95527	0.940429	1.16308	1.30636	0.843909	1.03899	1.275	0.897805	0.810044	1.11068	1.17065	0.876456	1.27891	1.14121	1.37493	1.4399	1.21186	1.29042	1.04241	1.13791	1.13004	1.23654	1.0997	1.04237	1.05446	1.16622	0.747242	0.825889	1.15636	0.938334	0.853064	0.980642	0.801546	0.93232	0.63383	1.20271	1.04619	0.978588	1.06389	1.10143	0.978141
-90.3883	0.900197	1.11642	1.08534	0.871059	1.0807	1.00002	1.13555	1.08349	0.996131	0.990014	1.13571	1.32467	0.933154	0.88743	1.26055	0.83634	0.947981	1.33892	1.10503	0.854758	0.951292	1.20199	1.47461	1.31786	1.41537	1.45253	1.05333	1.11366	1.1798	1.30423	1.31627	0.955734	0.924494	1.01531	1.09915	0.869167	0.897526	0.882118	0.930573	0.878953	0.795814	1.10677	0.740674	1.17473	1.00838	0.906148	0.885345	1.06384	1.04762
-90.2913	0.892561	1.14184	0.968973	0.882523	1.05158	1.11002	1.064	0.991967	1.00992	0.988752	0.928467	1.33855	0.824675	1.20919	1.32413	1.07391	0.888336	1.07932	1.09321	0.918607	0.961612	1.27138	1.46657	1.24172	1.42385	1.44838	1.08929	1.08127	1.03079	0.981092	0.890236	0.976355	0.885391	0.962851	0.82233	0.922789	0.91669	1.06811	1.00955	0.86962	0.86128	0.874254	0.585745	1.10486	1.07028	0.988047	0.984154	0.948708	1.05492
-90.1942	1.04914	1.37523	1.22118	0.833314	0.99756	0.972122	0.81593	1.13316	1.1831	1.00237	1.12782	1.34161	0.943928	0.896774	1.33467	0.945228	0.928047	0.907239	1.0904	0.966727	0.95651	1.35799	1.24312	1.25735	1.04231	1.11171	1.00807	0.950961	1.11247	1.13355	1.28655	1.21368	0.878847	0.898442	1.08789	0.992269	0.907826	0.924022	1.01585	0.929516	0.847331	1.12771	0.661547	1.09401	1.02665	1.00069	0.949012	0.943801	0.979468
-90.0971	1.10714	1.5182	1.26534	0.743843	1.13893	1.13448	1.59339	0.95717	0.964643	1.06848	1.06264	1.3234	1.04631	1.15482	1.24296	0.91215	0.916762	0.910203	1.10565	0.983391	0.920563	1.40235	1.1297	1.1688	1.11778	1.18492	1.01116	0.903369	1.11812	0.981746	0.991972	1.22631	0.989956	0.940294	1.02505	1.19125	0.843024	0.861335	0.989478	0.851118	0.866075	1.07428	0.703838	1.26692	1.15085	0.898013	1.12386	1.00239	0.954819
-90	1.11583	1.61595	1.20547	0.890836	1.06745	0.874869	0.823016	1.08126	1.22004	1.04622	1.03259	1.24527	0.912805	0.831402	1.28262	0.89865	0.800852	0.912551	0.998368	1.02424	0.815818	1.42558	1.07129	1.02815	1.42177	1.46305	1.11064	1.02564	0.965122	1.29383	1.20662	1.296	0.971703	0.852131	0.980241	1.03574	0.782633	0.960939	0.86261	0.967741	0.822119	0.789265	0.723388	1.01395	1.05876	0.875908	0.950565	1.05585	1.17558
-89.9029	1.01563	1.48876	1.19877	0.748874	1.06779	0.895503	1.28108	0.870034	0.94864	1.2106	1.14027	1.27007	1.00243	0.893758	1.12762	0.788627	0.73751	0.914592	0.82983	1.07717	0.676675	1.4155	1.02027	1.17748	1.36843	1.37286	0.989169	0.897023	0.969744	0.966537	1.06909	1.22677	1.11613	0.842209	1.13301	0.649709	1.01662	0.946682	1.02213	0.905877	0.869795	0.764075	0.640092	1.21236	1.00654	0.943586	1.06202	0.942156	1.07942
-89.8058	0.998172	1.40361	1.20995	0.920162	1.04112	0.961985	1.24117	1.17096	1.20373	1.03606	1.10173	1.19154	0.818751	1.13921	1.24997	0.934652	0.821743	0.935668	0.830026	0.838836	0.658618	1.35964	1.03403	1.29998	1.26793	1.25169	1.00891	0.948835	1.01047	0.987511	1.26778	1.10432	1.02304	0.939642	1.09651	0.949734	1.1082	1.00468	0.838777	0.886572	0.789544	0.711753	0.506691	1.07712	1.1853	0.861656	1.11588	0.971881	0.965154
-89.7087	1.14619	1.40257	1.2569	0.77502	0.996786	0.999691	0.984175	0.934666	0.909154	0.937566	1.12438	1.27163	1.03109	0.938017	1.17077	0.767875	0.838638	0.887465	0.886047	0.705228	0.637232	1.21223	1.17733	1.36881	1.07308	1.0686	1.06557	0.950458	1.09786	1.14078	1.13999	1.2209	1.01303	0.952172	1.17602	0.847036	0.912932	1.07367	1.16852	0.885959	0.78832	0.922368	0.700487	1.25667	1.09929	0.850788	1.00289	0.912425	0.975374
-89.6117	1.08792	1.33243	1.21339	0.886124	1.16241	0.908289	1.14855	0.904078	1.29763	1.11248	0.942767	1.16165	1.30172	1.04666	0.90506	0.976346	0.887997	0.700704	1.05372	0.781074	0.609186	1.2106	1.14393	1.18236	1.15193	1.1441	1.04007	0.918155	0.915519	1.02647	1.0732	1.15891	1.06857	0.958207	1.15878	0.889882	1.0499	0.842605	1.05742	0.907039	0.785364	0.767124	0.636452	1.08831	1.20278	0.953844	0.932554	0.992482	0.989734
-89.5146	0.926498	1.22774	1.12466	0.894736	1.0441	0.985041	1.21327	1.08954	1.0307	1.19458	1.07681	1.20877	1.10209	0.675189	1.05703	1.09808	0.739394	0.699812	1.11472	0.790956	0.880135	1.28187	1.02216	0.86827	1.36765	1.3489	1.0424	0.876038	0.892207	1.05908	0.992178	1.2687	1.03266	0.922704	1.05222	0.894651	1.00761	0.941883	1.13426	0.87235	0.793037	0.795779	0.585561	1.57564	1.11865	1.0932	0.886212	1.0712	0.935823
-89.4175	0.986769	1.22035	1.21455	0.836017	1.06931	0.962382	1.04634	0.975487	1.18218	1.13284	1.00997	1.41488	0.953574	0.880707	1.02681	1.00279	0.892809	0.791855	1.12239	0.767857	1.30058	1.24621	1.05767	0.836698	1.00672	1.00536	0.99295	0.93025	0.866161	1.15856	0.891063	1.00049	1.0123	0.896503	1.10881	1.07811	0.889777	1.0559	0.949733	1.05614	0.851565	0.986257	0.66611	0.952661	1.251	0.919717	1.07064	0.987612	0.987678
-89.3204	1.02096	1.23833	1.22758	0.897835	1.00888	1.26898	1.11881	0.829596	0.993546	1.17831	1.29533	1.26031	0.940885	0.966265	0.991957	0.915786	0.772864	0.93194	1.0174	0.967325	0.958935	1.22098	1.08719	0.933224	0.777052	0.786651	1.03924	0.873799	0.976177	1.25642	1.16152	0.991863	0.967853	0.977864	1.00013	0.969211	0.861931	1.15122	0.934482	1.02341	0.824646	1.01336	0.530942	0.954855	1.19425	0.927811	0.939855	0.917604	0.950923
-89.2233	1.003	1.30705	1.08689	0.927281	1.04435	0.973128	0.89712	1.15926	1.2379	1.0788	1.17664	1.26502	0.932943	0.978183	0.868796	0.776993	0.791543	1.0141	0.966003	1.07031	0.780257	1.2166	1.10471	1.28595	0.809912	0.817626	0.973725	0.975653	1.03271	1.03906	1.14212	1.07021	0.993556	0.977484	0.881755	1.01949	1.20938	0.991673	0.931677	0.976222	0.856567	1.0356	0.521061	1.005	1.02256	0.996576	1.14449	0.95244	0.90055
-89.1262	0.940338	1.26305	1.10211	0.706192	1.14031	1.15865	1.11632	1.04768	0.981195	1.12591	1.07857	1.30965	0.828705	1.11634	0.962769	0.937421	0.765491	0.980425	1.0218	0.980347	0.927514	1.2624	1.14481	1.23196	0.986592	0.960921	0.984875	0.940665	1.03338	1.14706	1.01451	1.04864	1.02249	0.891026	0.985925	1.10828	1.34429	0.894899	1.01827	0.977708	0.790474	0.719412	0.520722	1.14665	1.17719	0.984234	1.00396	0.933755	0.81964
-89.0291	0.85533	1.16269	1.19529	0.793092	1.08355	0.956865	1.21374	1.1149	1.09776	1.18077	1.1556	1.22749	0.816288	0.738589	0.866494	1.14545	0.852922	0.941677	0.967804	1.00078	0.979096	1.33329	1.1962	0.974619	1.23518	1.16038	1.03746	0.866063	0.918252	1.37315	1.13414	1.03544	1.02163	0.920709	0.964333	0.935561	0.864317	0.946491	0.889071	0.843743	0.820637	0.864636	0.451121	1.09655	1.03527	0.873437	0.894245	1.00479	0.869772
-88.932	0.913975	1.32419	1.19121	0.717676	1.01937	1.01138	0.900417	0.913112	0.934935	1.08926	1.21203	1.15457	0.756908	0.918152	0.955592	0.73653	0.745191	0.900393	0.858914	1.07642	0.982839	1.16681	1.14716	1.14355	1.03555	1.01661	1.0265	0.954019	0.960786	1.2104	1.22579	1.08602	1.02337	0.919894	0.904284	0.955311	0.996661	0.991061	0.899813	1.21584	0.910986	1.05265	0.55903	1.11221	0.741667	1.00524	1.08039	0.926295	0.919076
-88.835	0.963652	1.42796	1.24025	0.744641	1.05173	1.02936	0.99981	1.11612	1.15317	1.08607	1.11799	1.27201	1.03261	0.919315	0.82654	0.736027	0.77637	0.906522	0.909853	0.968037	0.914337	1.13582	1.10222	1.25769	0.965937	0.966496	0.973218	0.882336	0.953148	0.998574	1.05971	1.12569	0.951323	1.03905	1.10161	0.950103	0.983251	0.915585	0.955526	0.954232	0.940308	0.758443	0.507785	0.973091	1.18201	1.1411	1.09095	0.991011	0.904762
-88.7379	0.995394	1.41623	1.3955	0.790124	1.0251	1.11563	1.29136	0.923296	1.17775	1.06239	1.11296	1.29937	1.00337	0.812289	1.02958	1.08737	0.837183	0.911307	0.934507	0.948295	0.863398	1.3758	1.0655	1.26225	1.15634	1.10367	0.92834	0.829974	0.969087	1.20514	1.41918	1.13378	1.03165	0.988441	1.11678	0.88021	1.02221	0.838925	0.940086	1.14959	0.906309	0.80779	0.567597	0.845261	1.10304	0.772653	0.839606	0.988486	0.928306
-88.6408	0.906258	1.49788	1.3941	0.854329	1.04543	1.03722	1.01884	1.17129	1.05685	0.986348	1.13173	1.26318	0.909694	0.755436	1.14611	0.744183	0.933035	0.913404	0.906592	1.10583	0.847586	1.45816	1.09565	1.2912	1.17818	1.10226	1.01837	0.790161	1.0724	1.21447	1.45687	1.36122	0.973242	0.92689	1.14801	0.886803	0.958724	1.13602	0.843197	1.05989	0.965609	0.75921	0.512634	1.03097	0.96919	0.949063	0.864204	0.929161	0.791021
-88.5437	0.756684	1.62621	1.31438	0.862037	1.00722	1.11536	0.972649	0.981815	1.29773	0.900087	1.12939	1.27723	0.856678	0.98432	1.15579	0.750684	0.729607	0.844967	0.978545	1.14338	0.828167	1.46171	1.15922	1.33234	1.11574	1.03155	0.978923	1.01652	1.1044	1.26699	1.31659	1.42264	1.03766	0.876078	0.888261	0.79622	1.09174	0.855342	0.947109	0.92003	0.92778	0.874152	0.540658	1.17065	0.95014	0.907599	0.976831	0.985031	0.987418
-88.4466	0.837809	1.77969	1.01856	0.881115	1.02092	1.02114	1.27348	0.968287	0.94577	1.00387	1.19223	1.21524	0.994483	0.844895	1.28073	0.747127	0.771813	0.741263	1.10043	1.12094	0.806946	1.40767	1.20372	1.25765	1.23764	1.19163	1.00897	0.868578	0.968516	1.18418	1.26198	1.23813	0.969085	0.861439	1.03858	0.913727	0.964821	0.96862	0.88796	1.07724	1.02122	0.732305	0.51899	0.978074	1.2665	0.981682	0.871551	0.959425	1.06148
-88.3495	0.894429	1.88633	0.913871	0.840567	1.03331	1.04308	1.00894	1.07733	0.924026	1.17533	0.847918	1.30813	0.973161	0.712869	1.37729	0.7027	0.756531	0.835508	1.05169	1.10555	0.88929	1.31377	1.20137	1.21069	1.2364	1.20972	1.01161	0.924449	0.87695	1.14546	0.991586	1.17065	0.968379	0.880709	0.791965	1.02353	1.04034	0.92957	0.98853	1.00445	0.922827	0.588576	0.547186	0.842036	1.10355	0.890496	0.799642	0.930599	0.951341
-88.2524	0.902041	1.8993	1.19143	0.905792	1.08598	0.956332	1.34697	0.89875	1.16395	1.0588	1.06615	1.22117	1.01336	0.826032	1.49306	1.03095	0.854292	0.891014	1.04167	1.04075	0.89943	1.14017	1.10529	1.21919	0.988893	0.943818	1.01375	0.884005	0.956884	1.07808	1.27302	1.25344	0.901356	0.967423	1.0724	0.976628	0.792572	1.07528	0.970458	1.06983	0.91096	0.735028	0.473284	1.02775	0.997213	1.08045	0.859521	0.925253	0.841462
-88.1553	0.91946	1.66431	1.22365	0.821847	0.971403	1.02271	1.12116	0.973143	1.3846	0.911428	1.16103	1.18423	0.788471	0.727406	1.39821	0.742663	0.646682	0.869042	1.10908	0.877127	0.765162	1.07114	1.10342	1.21638	0.947998	0.918898	1.05701	1.05528	0.908766	1.1088	0.945614	1.2555	0.977947	0.847702	0.874173	0.957139	0.966789	0.964647	0.950811	0.958632	0.899946	0.684794	0.46449	0.835301	0.976075	1.00946	0.98383	1.04384	0.912863
-88.0583	0.941783	1.30534	1.13321	1.01651	1.14268	1.19024	1.24435	1.03589	0.99312	1.05548	1.14641	1.19668	0.939249	0.846911	1.31889	1.10901	0.782241	0.828292	1.10517	0.841993	0.760894	1.05439	1.14866	1.2079	1.01041	1.01447	0.994205	0.945967	0.918347	0.996943	1.29913	1.00835	0.926376	0.795886	0.987441	0.951207	0.918772	0.984445	0.907731	1.19994	0.905539	0.780928	0.50283	1.00225	0.961924	1.07836	1.01034	0.962758	0.948369
-87.9612	0.952277	1.2138	1.0098	0.916698	1.02455	1.07894	1.18777	1.15252	0.965122	1.20313	1.13756	1.37566	0.901525	0.897613	1.40116	0.829841	0.760173	0.778154	1.06558	0.871106	0.821628	1.1382	1.09264	1.31113	1.17248	1.25196	1.0566	0.948931	0.943778	1.11984	1.29052	1.18022	1.01183	0.95878	0.81234	0.693965	1.05909	0.884797	0.954003	1.1378	0.871	0.694358	0.494691	1.27612	1.16276	0.891229	0.907447	0.909239	0.873004
-87.8641	0.917797	1.18621	1.0161	0.800523	1.14649	1.0971	0.900258	1.07791	0.954658	1.13506	1.20856	1.19701	0.94182	1.1404	1.40835	0.835398	0.671392	0.808518	1.00728	0.692542	0.897346	1.19362	1.09049	1.35953	1.24685	1.34321	1.04344	0.824137	0.81951	0.894381	1.07785	1.19802	0.864666	0.843272	1.00198	1.02632	1.12169	1.00561	0.997824	1.05071	0.895221	0.974849	0.559333	0.889506	1.05775	0.979197	0.927697	0.908429	1.05643
-87.767	0.793369	1.2865	1.28178	0.846416	1.12489	1.04824	0.905039	1.19809	0.976495	1.1088	1.11496	1.37011	0.906234	1.06424	1.27207	0.805667	0.836859	0.866901	0.950654	0.708649	0.869863	1.19224	1.19608	1.29825	1.14583	1.14197	1.03134	0.834078	0.913254	1.09411	1.21354	1.37836	0.972253	0.966286	0.790633	0.8377	1.02726	0.836414	0.866932	1.00699	0.884409	0.968713	0.562623	0.933983	1.0426	0.98961	0.930107	0.942406	0.95832
-87.6699	0.864696	1.45856	1.46211	0.762202	1.00892	1.12479	0.954743	1.09024	1.07239	1.081	1.08336	1.29674	1.02495	0.651868	1.43763	0.979249	0.838808	0.981325	0.897385	1.1141	0.635975	1.18458	1.09661	1.3236	1.04293	1.00274	1.06819	0.913236	0.876891	1.05977	1.0204	1.36934	1.01706	1.10638	0.742184	0.879957	0.848531	0.904754	1.03014	0.972989	0.925201	0.800084	0.527815	1.12576	1.142	1.10336	0.886017	0.94891	0.984539
-87.5728	1.0339	1.66649	1.59978	0.87482	1.00891	1.2783	1.24582	0.97066	1.11416	1.10532	1.03575	1.3104	0.849364	0.657885	1.37738	0.888861	0.715442	0.987662	0.879407	1.15528	0.647785	1.17378	0.894607	1.39225	0.939094	0.894524	1.04307	0.841245	1.01294	1.10911	1.05795	1.46799	0.893382	1.07152	1.02936	0.975226	1.13344	1.04991	1.0297	1.13961	0.89802	0.728595	0.429529	0.96505	1.04955	1.10713	0.8832	0.91054	0.834056
-87.4757	1.02385	1.34644	1.29051	0.983998	1.08839	0.898156	0.955187	1.16687	1.16851	1.02874	1.12334	1.26387	0.815007	0.973093	1.22335	1.44744	0.789205	0.939956	0.879075	1.01434	0.782443	1.12526	0.979919	1.27454	0.995272	0.930052	1.02872	0.838565	1.03264	0.90406	1.27248	1.57702	0.907659	0.932188	0.707939	0.847601	0.969624	0.875904	1.15926	0.965983	0.869433	0.858846	0.57456	1.0132	1.089	0.97293	0.782707	0.871917	1.00861
-87.3786	1.00139	1.11808	1.16409	0.796542	1.07335	1.14799	1.09923	1.06998	0.964502	1.0688	1.15095	1.39386	0.791322	0.84454	1.22265	0.777838	0.778286	0.83329	0.915607	0.916682	0.954629	1.16634	1.10302	1.18021	1.02992	0.968636	1.08101	0.965755	1.05673	0.912152	1.03476	1.3907	0.951016	1.00868	0.978271	1.09193	0.765619	0.939726	1.03242	1.01273	0.819747	0.833048	0.457986	1.33969	1.16382	1.0367	0.943901	0.891927	0.81939
-87.2816	0.954111	1.07307	1.40337	1.12139	1.05312	1.00916	1.00335	1.23503	1.12808	1.25052	1.03591	1.25522	1.00866	0.99634	1.17662	0.95546	0.826347	0.808707	0.885382	0.889331	1.0219	1.38662	1.30169	1.13266	1.02152	1.01333	1.11145	0.871536	1.04527	0.978123	1.19617	1.25921	1.03767	1.03396	1.01761	0.867815	0.959513	1.16727	1.137	0.937594	0.951681	0.869174	0.535769	1.13185	1.38082	0.959402	0.845368	0.930364	0.964922
-87.1845	0.876093	1.22038	1.60539	0.617633	1.06355	1.20102	0.868839	1.20275	1.14465	1.07246	0.946691	1.27619	0.945675	0.76166	1.25254	0.791781	0.804685	0.94829	0.721642	1.00258	0.879343	1.42094	1.35214	1.12288	1.00306	0.958066	1.10616	0.761347	1.00686	1.01625	0.987188	1.06097	1.07817	1.15823	0.867563	0.868404	1.18946	1.103	1.05128	1.1131	0.881594	0.861573	0.514376	1.1415	1.16919	1.16331	0.942265	0.844276	0.898234
-87.0874	0.782706	1.46384	1.7888	0.85642	1.11462	0.943787	1.28309	1.19432	1.21457	1.09419	1.04554	1.2838	0.913996	0.842583	1.09153	0.91096	0.767842	0.866996	0.734903	1.07403	0.730196	1.36229	1.32847	1.13197	0.979564	0.852814	1.07977	0.919633	0.85067	0.919654	1.00944	1.11442	1.15659	1.0294	1.23681	0.806316	1.08369	0.964269	1.09845	1.021	0.876685	1.10302	0.610101	1.27917	1.19201	0.917191	1.0855	0.943384	1.00771
-86.9903	1.04317	1.25013	1.39512	0.809716	0.953516	1.21454	1.39046	0.993598	0.919644	0.960202	1.16397	1.29834	1.09422	0.745166	1.12143	1.05098	0.886491	0.675265	0.836664	1.12457	0.577755	1.23805	1.34575	1.12689	1.22004	1.16171	1.07342	0.840964	0.87316	0.993242	1.10583	1.25375	0.988016	1.05266	1.06733	0.829585	1.11599	0.867163	1.10028	0.948623	0.907222	1.13027	0.48631	1.05639	1.09192	0.973769	1.00607	0.984154	0.82914
-86.8932	1.22888	1.0818	1.07432	0.816569	1.01567	1.12907	1.30915	1.03301	1.20663	1.01708	1.0502	1.35367	1.08343	0.66717	1.19636	0.94448	0.799088	0.839009	0.691332	1.30074	0.810839	1.11151	1.35161	1.08168	1.37801	1.36847	1.12408	0.820419	0.870554	0.910473	1.009	1.03007	1.23387	1.05151	1.19449	0.747042	1.19695	0.940483	1.1779	0.990713	0.808921	0.930095	0.449162	1.00171	1.11575	1.01992	0.983112	0.963211	1.01878
-86.7961	1.26508	1.0042	0.899271	0.918694	1.03723	1.09736	1.00188	0.992665	0.968537	1.10632	0.952008	1.14815	0.972	0.808229	1.13445	0.883458	0.934318	0.931608	0.67676	1.34801	0.910049	0.980363	1.33463	0.956188	1.371	1.37097	1.14853	0.968983	0.983282	0.885747	0.843419	0.977029	1.03681	1.10481	1.10607	1.35021	1.34914	0.806717	1.11171	1.06214	0.803502	0.853143	0.499563	1.27027	1.1914	0.85936	0.980978	0.96715	0.98029
-86.699	1.21922	1.18361	0.890199	0.749161	1.08865	1.06184	0.937394	0.997423	1.01931	0.965566	1.01221	1.19103	1.0237	0.947065	1.07685	0.741874	0.745506	0.881915	0.923711	1.13747	0.741513	1.04891	1.30852	0.97515	1.23301	1.24771	1.12417	0.814142	0.977553	1.01282	1.12279	0.940798	0.958511	1.01409	0.897593	1.15759	1.03788	0.943231	1.04576	0.879132	0.885418	0.945828	0.553295	0.988523	1.23703	1.04346	1.02172	0.908517	0.981299
-86.6019	1.13232	1.49151	0.964113	0.743767	1.19708	1.05402	1.25674	1.01689	0.846983	0.995864	0.994488	1.32378	0.90949	1.00436	1.04844	0.899767	0.814472	0.872698	0.972112	0.976602	0.77905	1.2173	1.27784	1.06634	1.02953	1.06158	1.12563	0.872403	1.25032	0.951911	1.1477	0.844469	1.08568	0.940433	1.10807	0.909632	1.01168	0.976288	0.950197	0.921981	0.851146	0.978861	0.552115	1.19798	1.37124	0.921693	0.845553	0.98487	0.902213
-86.5049	0.998023	1.38953	0.886511	0.918655	1.02783	1.23569	1.10571	1.2623	1.22551	0.935725	1.03597	1.35463	0.938931	0.850147	1.04321	0.919285	0.957479	0.883718	0.921237	0.840575	0.919623	1.08691	1.34841	1.21853	0.996843	0.972669	1.11123	0.906321	0.940704	0.965933	1.17711	0.801789	0.963309	1.10794	0.981999	1.05609	0.868425	0.990418	1.01547	0.834282	0.830382	1.11065	0.557844	1.17955	1.29518	1.08235	0.958121	0.964272	0.892532
-86.4078	0.919368	1.36727	1.01648	0.90746	1.03176	1.02068	1.05193	1.13568	1.23079	1.3044	1.09961	1.24289	0.913747	0.762175	1.07954	0.839842	0.86547	0.829867	1.05522	0.998265	1.42703	1.03697	1.35619	1.2705	0.972572	0.923345	1.11836	0.840439	1.07877	0.992264	1.16809	1.24158	0.945468	1.02591	1.06248	0.975162	1.17155	1.06075	0.925618	0.942417	0.880142	0.972385	0.521365	1.12718	1.32827	0.934745	1.14662	0.919983	1.05241
-86.3107	0.952004	1.50446	1.56161	0.789324	1.00534	1.25333	1.0335	1.08582	1.19156	0.998936	1.49347	1.18975	1.14023	1.17826	0.917745	0.93792	0.757959	0.780019	1.16981	1.06077	1.67732	1.14795	1.2384	1.12204	0.965127	0.953198	1.18709	0.847754	0.984487	1.20849	1.11847	1.33174	0.964221	0.925636	1.1681	0.914305	1.33199	0.980292	1.04076	0.937169	0.794727	0.944386	0.600333	1.08708	1.12522	1.04682	0.819879	0.923489	0.960967
-86.2136	0.984251	1.57532	1.40908	0.795805	1.05016	1.06242	1.20708	0.875322	0.99124	0.966575	0.94684	1.27198	1.08049	1.01073	1.00972	1.01067	0.790524	0.738174	1.24559	0.932895	1.41336	1.14291	1.18461	1.09131	1.01827	1.02818	1.13008	0.901406	1.0999	1.10372	1.19281	1.12534	0.966691	1.04277	0.898309	1.08744	1.29319	1.11076	0.952705	1.04327	0.885562	0.758959	0.493726	1.2337	1.09517	1.07439	0.793883	0.890904	0.939176
-86.1165	1.0163	1.61302	0.90774	0.965064	1.05571	1.21148	1.15041	1.20403	0.937169	0.998726	0.964363	1.32281	0.894471	0.923406	0.979689	0.90217	0.79902	0.791647	1.1755	1.02277	1.13612	1.07986	1.16281	1.11943	1.10171	1.12573	1.14242	0.878344	1.03694	1.35698	1.21814	1.25542	1.12659	1.05744	1.09793	0.856389	1.02229	1.01234	0.931291	1.07623	0.872814	0.846094	0.601024	1.10283	1.05997	0.995061	0.884694	1.008	1.03426
-86.0194	1.04391	1.52503	1.21972	0.933813	1.09025	0.995108	0.929953	1.15506	0.931646	0.998739	0.945203	1.27144	0.838605	1.12032	0.950752	0.894841	0.690583	0.892779	1.03248	1.22152	0.852233	1.08657	1.21232	1.09301	0.925627	0.958634	1.1479	0.929354	0.911941	0.95425	1.23725	1.18555	1.05724	1.18328	1.18978	0.905333	0.998259	0.916635	1.08887	0.867653	0.892533	0.867596	0.606449	1.26296	0.933985	1.02805	0.895589	0.966236	0.858591
-85.9223	1.01016	1.41628	1.33862	0.787572	1.10047	1.03304	1.2623	0.874145	0.997995	1.08284	1.08277	1.35638	1.01306	0.924347	1.05854	0.807397	0.918185	0.771855	0.955343	1.16837	0.937541	1.09892	1.18583	1.04928	0.84773	0.878309	1.12417	0.927953	0.919891	1.14476	1.10051	1.08017	1.17334	1.07853	1.12499	0.838914	1.10749	1.02795	1.1464	0.934381	0.875416	0.775817	0.481096	1.22753	1.28116	1.0397	0.936099	0.903037	1.04081
-85.8252	0.853691	1.26598	1.07134	0.937599	1.10861	1.14007	0.947118	1.18105	1.09704	1.1094	1.16887	1.0568	0.848936	0.625147	0.922874	0.838111	0.855811	0.731419	0.910073	1.17709	0.965734	1.12254	1.00736	0.970907	0.966214	0.971535	1.18488	0.894825	0.929596	0.796896	1.11827	1.40858	1.05341	1.09407	1.24312	0.983545	1.42722	0.882708	0.988724	0.898877	0.83534	0.695155	0.613673	1.03402	1.2401	1.01839	1.00334	1.03266	0.973855
-85.7282	0.826135	1.19938	1.10257	0.633368	1.06705	1.10846	1.03672	0.87077	0.951661	1.04034	0.985678	1.15374	0.892624	0.857166	0.958951	0.855226	0.69664	0.851958	0.928533	1.30956	0.879694	1.13489	0.947659	0.952218	0.965581	1.00299	1.16098	0.991368	1.08668	1.12096	1.01229	1.13218	1.01116	0.911435	1.36176	0.871948	1.07138	0.95614	1.02361	0.808577	0.822833	0.944056	0.580723	0.952772	1.08512	0.901482	0.882702	0.969036	1.02243
-85.6311	0.863035	1.17462	1.28306	0.795381	1.13464	0.948385	1.19692	0.960281	1.24809	1.01671	1.08275	1.18342	0.907345	1.02453	0.974061	0.906727	0.689711	0.911298	1.04967	1.30078	0.840244	1.14161	0.947344	0.963368	0.905389	1.00355	1.18944	0.947903	0.945219	1.07839	1.02874	1.0632	1.09963	1.05061	0.96864	1.17883	0.952477	0.964686	1.06106	0.947257	0.835682	0.889641	0.486453	0.909204	1.47399	0.876557	0.777307	0.988675	0.986494
-85.534	0.893682	1.11284	1.39835	0.845791	0.985136	0.976064	1.09724	0.991153	1.0471	1.09537	1.27138	1.14538	1.08729	0.915548	0.889602	0.930671	0.908723	0.940038	1.22215	1.22137	0.824089	1.26422	0.868899	1.22444	1.00856	1.0302	1.24153	0.95044	0.908332	1.01981	1.10296	0.998049	1.01675	1.14372	0.76021	1.01121	1.26444	1.05502	0.949418	0.962834	0.849204	0.868385	0.525785	0.883117	1.12383	0.956152	0.93159	0.858352	0.981206
-85.4369	0.916801	1.10307	1.36742	0.743911	0.917824	1.17773	0.933001	1.07631	1.18906	0.838003	0.977132	1.19337	0.968839	0.997092	0.864776	0.821262	0.678526	1.03775	1.40001	1.1286	0.744521	1.29001	0.858733	1.35021	1.09084	1.05576	1.20136	0.899391	0.888667	0.854086	1.04807	0.984773	0.956126	1.07653	1.10634	1.01599	0.991089	0.997154	0.992516	0.910795	0.854472	0.841221	0.541465	1.04563	1.04951	1.08169	0.809878	0.980788	1.10096
-85.3398	0.924861	1.19734	1.04404	0.860227	0.978258	0.843053	0.856056	0.814066	1.05259	0.785996	0.998411	1.12809	1.08323	0.723185	0.883673	0.770723	0.91064	1.08652	1.38458	1.08602	0.694049	1.12215	0.985127	1.20536	1.13136	1.07916	1.22653	1.02261	0.994432	1.15213	1.11431	1.13144	0.843564	1.10835	1.04021	0.774895	0.958135	0.903862	1.04426	0.950674	0.803898	1.23581	0.568777	1.21689	1.19741	1.21676	1.01084	0.996576	1.00475
-85.2427	0.896243	1.20736	0.955965	0.756434	1.00303	0.990894	1.0832	1.09217	0.881796	1.07794	0.919938	1.14779	1.01123	0.590571	0.83296	0.745472	0.842473	1.03741	0.982576	1.1438	0.701772	1.21336	1.05958	1.06457	1.08086	1.06925	1.178	1.06265	0.96052	1.04773	0.903263	1.22362	0.959013	1.07604	1.19277	1.08482	0.997488	0.987981	0.997917	0.991849	0.827929	0.90056	0.612777	1.01612	0.896111	0.938612	0.76698	1.00326	0.962442
-85.1456	0.849286	1.17526	0.985541	0.851346	1.04104	1.0921	0.764298	1.027	1.00064	0.946125	0.875968	1.24037	0.901153	0.74365	0.82543	0.857205	0.861403	0.977874	0.907225	1.25328	0.755841	1.43411	1.10806	0.925799	0.984857	1.04268	1.20363	0.922145	0.881877	1.11981	0.991955	1.29294	0.977967	1.12729	1.00658	0.977492	1.01729	0.78729	1.19287	0.910073	0.876003	0.872091	0.556007	0.941524	0.943821	0.967703	0.998446	0.949001	0.962986
-85.0485	0.87283	1.23183	0.957929	0.986279	1.04486	1.13372	1.02001	1.10114	1.23945	0.875256	0.831666	1.13697	0.970705	1.06914	0.851912	0.823013	0.73822	0.913136	0.995204	1.38862	0.833083	1.35663	1.16142	1.03519	0.894872	0.900311	1.21507	1.05437	1.0472	1.03466	1.00811	1.02663	0.964231	1.06004	1.11868	1.17596	1.07176	0.986246	1.04043	0.874496	0.842372	0.793383	0.568365	1.13084	0.999449	1.14603	0.97289	0.958051	1.02511
-84.9515	0.870987	1.22594	0.970782	0.897731	0.997128	1.04806	0.961418	0.997579	1.11989	1.05006	0.901065	1.27134	0.981019	0.674306	0.859578	0.756241	0.823475	0.81494	1.01462	1.11114	0.85101	1.24367	1.14357	1.0471	0.88434	0.856231	1.24541	0.922335	0.934453	1.30154	1.15071	0.864024	1.11853	1.04842	1.20022	0.776831	0.999514	0.951411	0.985709	0.895728	0.751123	0.776886	0.672167	1.14025	1.06524	1.0553	0.8099	1.038	0.973355
-84.8544	0.818371	1.09513	1.06457	1.03435	1.04776	1.09582	0.78919	0.909699	1.0671	1.00846	0.998736	1.34762	0.945199	1.1211	0.783093	0.905286	0.746789	0.748699	1.00986	0.973625	0.87921	1.05974	0.983273	0.864031	1.03271	1.00873	1.3402	0.936859	0.961117	1.08212	1.414	1.09284	1.01311	1.11636	1.0084	1.20527	1.30577	1.08293	1.14015	0.80402	0.799145	0.948385	0.653443	0.956671	1.14497	1.08875	0.798807	1.03401	1.13057
-84.7573	0.814255	1.08012	1.13952	1.02378	1.01024	1.26436	0.980854	1.00922	1.15875	0.90445	0.882641	1.21717	1.03267	0.8893	0.747942	0.830803	0.727842	0.746368	0.956756	1.11605	0.927958	1.02479	0.984634	0.870084	1.03501	1.02872	1.29468	0.947366	0.874211	1.03253	1.14593	1.17504	0.999322	1.05217	1.28602	0.817334	1.17809	0.807618	1.16498	0.938064	0.789233	0.87369	0.516182	1.19325	1.08293	1.21335	1.06011	0.992757	1.03703
-84.6602	0.834388	1.12302	1.20506	0.938899	1.00092	1.1172	0.809812	0.999463	1.16946	0.993386	0.859129	1.28977	1.05657	0.972358	0.761438	0.774011	0.799422	0.808689	1.04517	1.12582	1.01236	1.06432	1.06682	0.9707	0.964267	0.982462	1.29859	0.886053	1.24388	1.16867	1.08084	1.10589	1.0085	0.982265	1.11301	0.918547	1.11308	0.949301	0.86246	0.83808	0.803597	0.916829	0.624931	1.16775	0.998152	1.21037	0.83439	0.966812	0.953366
-84.5631	0.868198	1.10002	1.24628	0.886749	1.03062	1.03899	0.934416	1.1638	1.06899	1.13294	1.00798	1.43443	1.06675	0.736279	0.748812	0.816859	0.867402	0.903336	1.20433	1.06928	1.11459	1.07782	0.907914	0.94294	1.00553	1.04552	1.34198	0.9394	1.07712	1.06995	1.46895	1.22311	1.05839	0.876968	1.26604	0.898385	1.32611	0.874942	1.144	0.816169	0.878865	0.937046	0.573235	1.31439	1.22634	1.26547	1.2615	0.991974	1.00469
-84.466	0.887145	1.07346	1.20099	0.801245	0.972268	1.04934	1.09809	1.12446	1.16132	1.03208	1.05779	1.42085	1.02411	0.880633	0.761836	1.22712	0.872437	0.857208	0.972413	0.962818	1.1557	1.06756	0.866667	0.900647	1.09778	1.15325	1.25333	0.994272	1.17232	1.10635	1.22152	0.876798	1.02507	1.0161	1.08037	0.798411	1.29294	0.718571	0.995994	0.869388	0.73246	1.19185	0.568375	1.02897	1.01483	0.917332	0.891591	1.03104	1.1936
-84.3689	0.876367	1.03978	0.982663	0.975337	0.930549	0.991624	0.797383	1.15783	1.19853	0.863099	0.980521	1.34011	0.970326	0.845954	0.810227	0.953036	0.954499	0.833917	0.775668	0.8646	1.10638	1.0098	1.06075	0.829291	1.29202	1.35031	1.31128	0.862901	1.10544	1.14184	1.13069	1.0854	1.13601	0.875267	1.12052	0.796607	1.44641	0.941582	1.01461	0.887006	0.807995	0.924001	0.553668	1.06772	1.20011	1.06146	1.16378	0.921472	0.928167
-84.2718	0.837469	1.06903	1.02369	0.675892	1.03902	1.05416	1.01135	0.945635	1.02937	1.10738	0.779025	1.38083	1.02366	0.87719	0.784161	0.838032	0.882169	0.856299	0.649275	0.782873	0.87624	1.06683	1.07828	0.793599	1.18277	1.19671	1.25191	0.896358	0.933582	1.09678	1.13159	1.36086	1.04948	0.968394	1.10402	0.896264	1.06137	0.966101	1.08595	0.891588	0.773478	1.01749	0.510964	1.29678	1.42227	0.976686	1.0912	1.18706	0.920603
-84.1748	0.784511	1.12975	1.19439	0.939998	1.00229	0.848791	1.18046	1.04297	1.09955	1.08511	0.874199	1.37208	1.00811	1.01545	0.746281	1.11227	0.891235	0.795123	0.692403	0.770353	0.876812	1.18125	1.00752	0.775739	0.921763	0.867775	1.22671	0.85594	0.929478	1.10515	1.01873	1.14523	0.972353	1.08477	1.18328	0.742832	1.16624	0.912111	1.08782	0.789412	0.757396	1.03765	0.586557	1.34421	1.18535	0.873132	1.20439	1.01692	0.96417
-84.0777	0.890585	0.994024	1.16623	0.784556	0.995242	0.957722	0.849449	0.814862	1.3619	1.03643	0.955448	1.52019	1.32251	0.775315	0.786179	1.14454	1.01526	0.692169	0.820292	0.792436	0.992741	1.10442	0.912733	0.812138	1.08	1.0674	1.20954	0.831744	1.17515	1.07456	1.12897	0.882983	1.07249	0.927252	1.19543	0.888027	1.08946	1.08526	1.05777	1.02949	0.849628	0.959688	0.563422	1.13919	1.30267	1.07508	1.17815	1.05299	0.854166
-83.9806	0.967487	0.904956	1.08325	0.806382	1.00495	0.997056	1.06619	1.04436	1.27389	1.09946	0.997886	1.6314	1.14862	0.786849	0.760545	0.713393	1.08129	0.912999	0.77357	0.952896	1.0113	1.04552	0.897358	0.798249	1.11163	1.12464	1.1942	0.8622	1.09121	1.06697	1.38541	0.899223	1.02719	1.10987	1.07072	0.801453	1.15435	1.01503	1.01934	0.951469	0.79177	0.910386	0.658568	1.30455	1.49701	0.846515	1.00823	0.935415	1.21589
-83.8835	0.986045	0.909199	0.890598	0.85811	0.988493	0.975295	0.928926	0.921932	1.14081	1.23411	0.86074	1.48659	1.23385	0.848441	0.776945	0.912825	1.13907	0.984554	0.812181	1.02572	0.913304	1.02246	1.04082	0.683784	0.89005	0.897081	1.23932	1.00702	1.07347	1.03753	1.16519	0.974438	1.0894	0.967852	1.03244	1.01615	1.0954	1.04036	1.10102	0.835471	0.860583	0.831955	0.561316	1.25508	1.04154	0.805135	1.03958	1.12643	1.12919
-83.7864	1.17935	0.990246	0.882334	0.871776	0.966098	0.998498	1.05271	0.884289	1.0169	1.18981	0.797293	1.36677	1.02174	0.885077	0.840298	1.04579	1.16333	0.757557	1.02146	0.923285	0.582182	1.00867	1.10401	0.726329	0.828006	0.811534	1.21693	0.834272	0.954834	1.1536	1.04956	1.15797	1.06009	1.07624	1.06193	0.942761	1.11057	0.777921	1.0687	0.907148	0.801599	0.85606	0.523021	1.55994	1.22164	0.948468	1.08377	1.15967	0.968506
-83.6893	1.46002	1.1097	0.966262	1.02884	0.95622	1.01016	0.798902	1.00548	1.12187	1.04262	0.926192	1.31029	1.119	0.901821	0.84622	1.15529	1.20813	0.703346	1.02218	0.992833	0.738934	0.999505	1.12706	0.847379	0.845727	0.796992	1.17824	0.835805	1.14974	1.10518	1.24843	0.940311	1.09057	0.930599	1.17486	0.911345	1.27033	0.946985	1.01749	0.979262	0.872957	0.740507	0.551809	1.24185	1.13428	1.0721	1.21476	1.00808	1.25141
-83.5922	1.31736	0.95142	1.00222	0.908762	1.11974	1.01424	0.876326	1.24709	1.20236	1.09372	1.22384	1.32988	1.18587	0.928923	0.819891	1.0981	1.13683	0.735526	0.91863	1.14837	1.13962	1.0552	1.09548	0.893248	0.881436	0.86197	1.15108	0.906481	0.878508	1.10285	1.25998	1.16848	1.02325	1.26936	0.934453	0.846978	1.30099	0.874088	1.07314	0.921054	0.783773	0.915492	0.52798	1.25711	1.22514	0.91528	0.816494	1.10383	1.07583
-83.4951	1.26316	0.8546	0.986716	0.815088	1.08508	0.950526	1.15708	1.16578	1.36021	1.18455	0.978174	1.38421	1.05951	0.906735	0.806336	1.21561	1.05893	0.816918	0.988165	1.06769	1.05772	1.08704	1.02193	0.943627	0.95931	0.949235	1.13396	0.830992	1.1707	1.01061	1.15221	1.15298	0.845375	1.03024	1.33144	0.830303	1.14832	0.829011	0.964347	0.881203	0.851378	0.771929	0.528575	1.31878	1.32982	1.00595	1.02176	0.957165	0.934611
-83.3981	1.38589	0.88069	0.868289	0.89714	1.02163	1.00867	0.823439	1.09714	1.14771	1.13583	0.969713	1.36112	1.31005	1.13092	0.845408	1.26699	1.19683	0.846993	0.977083	0.96459	0.96686	1.07118	0.864419	1.00302	1.12151	1.08107	1.16771	0.88406	1.07573	1.0276	1.08326	1.08393	1.03743	1.06549	1.14427	0.874806	0.883355	1.01084	0.94803	0.928337	0.915464	0.683365	0.571503	1.21314	1.49618	1.05413	0.922701	1.01838	1.06572
-83.301	1.37988	0.820391	0.835246	0.836502	0.936279	1.05899	0.871246	0.976683	1.36598	1.02606	1.13962	1.4062	1.04157	0.84588	0.757504	1.00475	1.23211	0.774436	0.804767	0.816644	0.858098	1.09393	0.953174	0.952874	1.07012	1.05743	1.19964	0.874181	1.18424	1.11333	1.43605	1.12563	1.08753	1.01751	0.978909	0.838488	1.03505	0.889745	1.04971	0.860442	0.911416	0.773116	0.517797	1.5649	1.35417	1.06351	1.13351	1.08017	1.00431
-83.2039	1.3095	0.716899	0.844895	1.1002	1.03848	0.981263	0.928355	1.14218	0.953792	1.09073	1.25374	1.30186	1.04077	0.845438	0.651361	0.887016	1.3144	0.866489	0.771725	0.902799	0.742204	1.136	1.16506	0.847955	0.911916	0.956032	1.21388	0.913001	0.873965	1.37961	1.27719	1.27084	0.986273	1.02501	0.895554	0.726416	1.00561	1.06381	1.16364	1.04459	0.933258	0.606998	0.590684	1.36038	1.7392	1.01961	0.92831	1.00354	1.01522
-83.1068	1.27146	0.872008	0.851891	0.904462	1.12214	1.00366	0.815461	1.01553	1.03651	1.14218	1.00728	1.41396	1.12698	0.924994	0.811321	1.16801	1.30479	1.04085	0.808321	1.10601	0.622745	1.08076	1.04122	0.945989	0.885635	0.886874	1.23753	1.00763	1.08527	1.18418	1.31557	1.21726	0.992882	0.896117	1.18346	0.879873	1.02408	0.978406	1.05437	1.07569	0.89599	0.628843	0.537903	1.25313	1.18421	0.915791	1.08214	1.04327	0.967819
-83.0097	1.24319	0.986988	0.857995	0.699957	1.02995	1.08161	0.991434	1.0527	0.980807	1.00728	0.984313	1.26161	0.939284	0.94399	0.886293	0.949923	1.39803	0.871064	0.831885	1.34046	0.822577	1.01169	0.965848	1.10761	0.845412	0.820061	1.20109	0.890563	1.11052	1.10567	1.20151	0.980427	1.00277	0.907519	0.941283	1.01338	0.904308	0.823888	1.07608	0.959259	0.907591	0.651765	0.497095	1.43139	1.55093	0.93765	1.03822	1.06774	0.809658
-82.9126	1.23446	1.02171	0.862318	0.818388	0.976493	1.1615	0.812084	0.997197	0.96869	1.02455	0.970652	1.2673	1.13916	0.872187	1.05219	0.889401	1.40111	0.837598	0.819368	1.37042	0.876249	0.914946	0.98741	1.39641	0.777304	0.757938	1.18747	0.840515	1.17961	1.09956	1.22247	1.19929	1.21614	0.963559	1.15668	0.957774	1.18282	0.887234	1.06648	0.978937	0.821588	0.954319	0.633241	1.23325	1.65969	1.02413	1.18804	1.05692	1.00499
-82.8155	1.23809	0.961944	0.812253	0.842628	1.04148	1.21055	1.06954	0.814126	1.16525	1.20311	1.06171	1.39306	1.20115	0.956481	0.904011	1.07279	1.43114	1.07676	0.734686	0.991363	0.637602	0.870044	1.00367	1.31061	0.856312	0.833219	1.25879	0.869515	0.89873	0.908011	1.23166	0.918379	0.99366	1.12345	0.882415	0.775963	0.865714	0.97407	0.908482	0.808065	0.807704	0.939678	0.630098	1.51756	1.5272	0.870629	1.13453	0.961079	0.891576
-82.7184	1.24791	0.854931	0.734996	0.908278	1.00048	0.904366	0.912698	1.14268	1.46453	1.21411	0.813809	1.42132	1.01643	0.760497	0.951793	0.946421	1.23953	1.10665	0.790862	0.999053	0.650565	0.851061	1.01728	1.03751	1.00888	0.977201	1.23652	0.916583	0.923958	1.12438	0.912701	1.05826	0.966057	0.909285	1.12123	0.830505	0.792582	0.94743	1.0399	1.11326	0.828825	0.885603	0.547665	1.23192	1.24032	0.887732	1.06752	1.04067	1.12865
-82.6214	1.10079	0.899538	0.898375	0.955065	0.973551	1.17975	0.770985	0.980343	1.08015	1.0112	1.12407	1.50224	1.01501	1.08945	1.14391	0.858898	1.14655	1.03191	0.917467	1.20011	0.789332	0.923172	1.06433	0.974255	1.01975	1.00948	1.28268	0.780146	0.864939	0.987189	1.03004	1.15592	0.941185	0.938701	0.847442	0.855609	1.11809	0.940151	1.0594	0.960049	0.795502	0.924289	0.60129	1.17969	1.23308	1.07547	0.98493	1.0899	1.09559
-82.5243	1.02346	0.894527	0.956146	0.768234	0.952779	1.02565	0.858064	0.941199	1.07525	1.18962	0.862718	1.39831	0.775671	0.81423	1.28193	1.10402	1.32032	1.09324	0.978531	1.12966	0.817886	0.99238	1.12653	0.990734	1.12476	1.12314	1.20827	0.856877	0.819969	0.869941	1.00122	1.02697	1.0659	0.854946	1.29227	0.916426	0.993702	0.741804	1.05053	0.895493	0.902915	0.866833	0.663987	1.27326	1.5458	0.911766	1.03444	1.02415	1.09735
-82.4272	1.08571	0.79028	0.802701	1.07021	0.98133	1.03589	0.899619	0.916302	1.00549	1.12991	0.896408	1.46951	1.00451	0.898437	1.30689	1.03514	1.27695	1.13593	0.963592	1.07174	0.812426	1.05578	1.21905	1.16668	1.41805	1.39955	1.27275	0.924486	0.851235	0.94094	0.920533	0.988463	1.03845	0.962952	1.19469	1.15069	1.07874	0.899495	1.28556	0.937877	0.90286	1.00074	0.601974	1.17961	1.47618	0.959945	1.01374	0.981891	1.09778
-82.3301	1.08531	0.746922	0.897233	0.905352	1.06768	0.97494	0.816499	1.04229	1.02917	1.09352	0.768533	1.49603	0.961277	0.633857	1.30617	1.19584	1.21054	1.14132	0.796645	1.03889	0.73894	1.01123	1.06567	1.1224	1.3164	1.2852	1.29631	0.882312	0.922719	0.942179	1.03864	1.00834	1.04172	0.899078	1.29987	0.930995	1.00485	1.14672	1.13061	0.933653	0.905565	1.36451	0.673503	1.36046	1.28498	0.818629	1.10358	1.11563	1.00747
-82.233	1.05357	0.734009	1.11575	0.857346	0.94885	0.893576	0.623021	0.822268	1.09243	0.856668	0.909623	1.51586	1.00774	0.770915	1.36253	1.25955	1.43026	1.01861	0.823323	0.954055	0.849468	0.912693	0.789336	0.968015	1.01728	0.975467	1.1661	0.881826	0.994525	1.00648	0.859614	0.890874	1.0485	0.993038	1.05557	0.814356	1.07686	0.963021	0.994823	0.984272	0.845882	0.790711	0.705682	0.947464	1.2549	0.874606	1.0271	0.968396	1.04236
-82.1359	1.02736	0.891577	1.24321	0.926535	0.945924	0.954043	0.757097	0.870721	1.02717	0.884107	1.0584	1.48069	0.92064	1.13153	1.39216	0.890842	1.33646	0.831845	0.946814	0.843231	1.052	0.949984	0.783126	1.03055	0.782086	0.715996	1.26585	0.895001	0.992629	0.933164	0.956026	0.978537	1.03168	0.910556	1.0707	0.748846	1.12972	0.89397	1.15213	1.09859	0.873987	0.989888	0.609963	1.14309	1.6023	0.679979	1.40578	1.05743	0.993974
-82.0388	0.954217	0.966407	1.22544	0.897454	1.0503	0.984998	0.709596	0.71603	0.989762	0.961481	0.923607	1.42136	0.972192	0.785158	1.41484	1.06604	1.42829	0.973063	1.06898	1.17652	1.14639	0.979509	0.824925	0.986179	0.846465	0.765103	1.22086	0.823311	0.8745	0.930064	1.12692	0.892074	1.03881	1.05078	1.32129	1.14404	0.994569	0.964534	1.1334	0.872131	0.826948	1.12873	0.674235	1.19645	1.21499	0.953508	1.17831	1.00937	1.0016
-81.9417	0.787211	0.875763	0.917182	0.963465	1.0084	1.11438	0.900053	0.945908	1.02211	1.07877	0.722435	1.48797	0.911256	1.23361	1.39403	1.01777	1.18675	1.05245	1.12502	1.38251	1.19086	0.993504	0.962743	0.727988	1.50999	1.43137	1.20225	0.921282	0.938121	1.08378	1.04434	0.903357	1.08418	0.933495	0.996308	0.995012	1.14178	0.95814	1.18012	0.911783	0.844988	0.99806	0.528806	1.22777	1.81272	1.10676	1.14944	0.9917	1.24482
-81.8447	0.826614	0.787615	0.820813	0.88111	0.956945	0.907427	0.691633	1.09647	1.12113	1.0228	0.861982	1.42889	0.888234	1.1983	1.4259	1.09404	1.27079	1.00817	1.04882	1.3339	1.13547	1.06166	0.877454	0.675631	1.43781	1.4003	1.21267	0.904808	0.894422	1.2072	1.03698	0.978358	1.07341	0.909181	1.00129	0.911454	0.88153	0.967197	1.16835	0.885091	0.865774	0.974471	0.61947	1.53592	1.24642	0.966847	1.02369	0.942674	1.02355
-81.7476	0.969222	0.700716	0.830387	0.87855	0.996504	0.92493	0.737124	1.08364	0.874149	1.12859	0.98171	1.45478	1.11223	1.0315	1.25895	1.29457	1.43685	1.06829	1.01768	1.18151	0.851293	1.15689	0.680611	0.726191	0.99778	1.02057	1.15266	0.898949	1.09649	1.17382	1.20519	1.0245	1.22174	1.14116	0.923628	0.933884	1.0077	0.842129	1.20432	0.968452	0.779971	0.835152	0.673259	1.34681	1.26639	0.930627	1.28935	1.05959	0.995019
-81.6505	0.960181	0.809068	0.912836	1.06712	1.01376	1.01164	0.725404	1.06767	1.07405	0.995143	0.920971	1.40474	0.819475	0.854634	1.27218	1.10318	1.60446	1.1806	1.00908	0.977229	0.452718	1.08742	0.836767	0.817381	0.926083	0.901102	1.18645	0.840505	1.01761	1.10051	1.15172	1.08465	1.16546	1.03318	0.982891	0.889558	1.21376	1.15034	1.06932	0.854704	0.822205	0.788387	0.688929	1.30789	1.39414	1.0691	1.3151	0.962368	0.943907
-81.5534	0.940918	0.822157	0.959569	0.942314	0.988715	1.04362	0.758454	0.979039	1.01446	1.12787	0.895427	1.36471	0.974536	0.989308	1.14962	1.1432	1.23968	1.31973	0.904591	0.966458	0.841741	1.1	0.957526	0.865801	0.871072	0.812873	1.18518	0.949711	0.935253	0.979937	1.13331	0.869648	1.21124	1.01543	1.11987	0.974938	1.49094	1.11855	0.959337	1.00515	0.836111	0.887088	0.802046	1.03276	1.32501	0.793509	1.06544	0.981464	1.12481
-81.4563	0.90121	0.644718	0.934869	0.750745	1.04554	1.11836	0.804357	0.965048	1.09469	0.981702	0.908904	1.29121	0.989835	0.741252	1.18927	1.22461	1.33112	1.33246	0.871679	0.971584	1.06828	1.27671	1.00749	0.828681	0.849434	0.787117	1.11813	0.887134	1.06744	1.1989	1.1684	0.841564	1.25798	0.921561	1.46321	0.978	1.31506	0.943903	1.173	0.874625	0.838435	1.10121	0.637265	1.14593	1.33106	1.06234	1.13478	1.06836	1.07168
-81.3592	0.860699	0.724125	0.818	0.904544	1.01451	0.868344	0.794393	0.909905	0.95793	0.962224	0.928686	1.49102	1.22357	0.887593	1.28328	1.38182	1.31655	1.09241	0.981927	1.0085	0.969866	1.32538	1.03572	0.908644	0.97332	0.912626	1.04173	0.909456	1.12797	1.20278	1.25586	0.951465	1.22854	0.904299	1.02136	0.957323	0.979713	1.12676	0.880772	0.903235	0.880207	0.783977	0.607097	1.03527	1.27499	1.0212	1.24011	1.00826	1.05741
-81.2621	0.819786	0.931954	0.655046	0.944496	0.986091	0.946653	0.853203	0.983031	1.16324	0.966412	1.03501	1.28723	0.898215	0.773887	1.15638	1.15679	1.42494	1.01269	1.10243	0.988545	0.969803	1.31004	1.05308	1.04715	1.16997	1.11377	1.03904	0.824735	1.01817	1.05385	1.24149	1.13077	1.11269	0.922642	1.30211	0.952084	1.14661	0.873861	0.942132	1.00686	0.845749	1.03781	0.7347	1.26267	1.12351	1.18158	1.0427	1.09644	1.09069
-81.165	0.876532	0.849778	0.859035	0.689017	1.03898	0.98646	0.973711	1.08158	0.961807	1.01031	1.07309	1.27438	1.10105	0.588541	1.07755	1.13577	1.42088	1.01313	1.22807	0.940145	1.01892	1.13662	0.881175	0.827812	0.994161	0.923901	1.20202	0.928574	1.14254	0.940242	1.01129	0.984689	1.13788	0.950627	1.15451	1.03978	1.28497	1.08294	1.07856	0.978906	0.78121	0.973878	0.675452	1.32821	1.55997	1.01141	1.03909	1.00259	1.13503
-81.068	0.905187	0.802045	0.96675	0.894125	0.980995	0.979867	0.908634	1.16136	1.04816	1.16246	0.940727	1.35826	1.07405	0.776507	1.18006	1.06002	1.26009	1.08362	1.13817	0.870042	0.873041	1.1049	0.805957	0.746482	0.877299	0.817826	1.07752	0.92085	1.12322	1.13615	1.23695	1.09447	1.20372	0.97756	1.30271	1.00258	1.28487	0.928646	1.19751	0.965658	0.843077	1.15496	0.700035	1.2174	1.31541	1.15	1.29399	1.03125	0.991002
-80.9709	0.877659	0.823198	0.881917	0.785073	1.00432	0.996216	0.771808	1.04447	1.20037	0.922961	0.996275	1.24477	1.0093	0.982171	1.14236	1.14012	1.06771	1.10805	1.00812	0.893979	0.78858	1.35654	0.924116	0.94117	0.878326	0.879331	1.01006	0.912198	1.23757	1.03806	0.955477	0.921498	1.18291	0.99196	1.23219	0.821691	1.22964	0.988117	1.1337	0.902538	0.893701	1.17932	0.669787	1.35774	1.33486	0.923472	1.2136	0.988126	1.06325
-80.8738	0.839669	0.766517	0.809717	0.678037	0.930308	0.896827	1.05189	0.902018	1.03645	0.970368	0.880986	1.31371	0.985774	0.673821	1.09141	1.43219	1.38052	1.04039	0.797748	1.106	0.826946	1.43934	0.983408	1.00934	0.913421	0.929168	1.15259	0.870803	0.967166	0.911589	1.06815	1.10448	1.30562	0.978041	1.43844	0.963959	0.94077	1.02968	1.12925	0.994962	0.858979	0.952126	0.716113	1.40859	1.07307	0.962284	1.10582	0.976947	1.02237
-80.7767	0.796448	0.670919	0.743832	0.811325	0.996099	0.918957	1.21041	0.975145	0.938039	1.01813	0.794666	1.43768	0.992214	1.02975	1.02908	1.26657	1.11927	1.12407	0.840159	1.13739	0.748972	1.43771	1.01327	1.01425	0.965549	0.973171	1.14864	0.983473	0.845535	0.99463	1.04598	1.02788	1.12468	0.882922	1.47541	1.05949	1.14501	1.02006	1.2478	0.925272	0.882074	1.17348	0.580734	1.24722	1.45587	0.990639	1.22442	1.01627	0.856887
-80.6796	0.822937	0.749383	0.869795	0.781969	0.962971	0.955275	0.775527	1.00268	1.04184	0.862566	1.15352	1.53812	1.05352	0.894538	0.971173	0.97598	1.47969	1.28343	1.00896	1.07847	0.612826	1.13132	1.05013	1.13929	1.05416	1.09567	1.17604	0.849277	0.994358	1.06955	1.05959	0.821351	1.07755	1.08545	1.23696	0.89775	1.24299	1.04258	1.29342	0.847085	0.905222	0.762242	0.72419	1.03902	1.64333	0.909458	1.04596	1.04899	0.885126
-80.5825	0.838241	0.770769	0.999068	0.879299	1.02242	0.926706	0.768818	1.0903	1.28551	1.04505	0.916522	1.35549	0.929287	0.668347	0.955479	1.21455	1.15644	1.22112	0.955846	1.01012	0.911959	1.00623	1.03072	1.20032	1.10497	1.13315	1.21282	0.939612	0.824615	1.11093	1.10598	0.91463	1.12239	0.928654	1.30784	1.3539	1.06729	1.11366	1.18908	0.785594	0.807074	1.00194	0.679123	1.17751	1.01409	0.84565	1.12307	0.987246	0.98791
-80.4854	0.831173	0.677997	1.13496	0.714654	1.07321	0.969186	0.971586	1.0476	1.04077	1.21179	0.921261	1.44809	1.10026	0.839672	0.934506	1.22701	1.12335	1.22183	0.917984	1.07161	1.05283	1.24377	0.89875	1.13332	1.08017	1.00061	1.20934	0.931176	1.03079	1.02624	0.969622	0.943891	1.08442	0.792999	1.07414	0.875454	1.18435	0.96809	0.976481	0.967917	0.805639	1.10473	0.662142	1.18108	1.14685	1.00407	1.27265	0.964597	0.955988
-80.3883	0.928459	0.767516	0.9742	0.940181	1.02214	0.915016	0.857061	0.793279	0.948917	0.952359	1.06441	1.38214	1.15665	0.785143	1.00609	0.87917	1.24084	1.34856	0.910628	1.39278	0.87717	1.17822	1.01253	1.08433	0.922831	0.866858	1.139	0.787264	1.01724	0.949552	1.13111	0.891504	1.02075	0.810241	1.19593	1.25539	1.09237	1.03021	0.968525	1.08892	0.833702	0.942559	0.72694	1.48771	0.996343	0.868046	1.02311	1.06095	1.02066
-80.2913	1.07792	0.94818	0.665106	0.857542	1.07381	0.880169	0.887829	0.917311	0.970745	1.07329	0.888807	1.37949	1.05199	0.862814	0.97622	1.31032	1.24604	1.34318	0.899847	1.22863	1.10282	0.961127	1.24917	1.04435	0.699232	0.7325	1.11832	0.968743	0.935194	0.821856	0.912414	0.902053	1.02494	0.967493	0.915084	0.88778	1.10808	0.909144	1.02568	0.980642	0.829707	1.03961	0.603465	0.996067	1.20607	0.851159	0.988443	0.927766	1.01792
-80.1942	0.920702	0.837697	0.899381	0.806674	0.938099	0.957575	0.988135	1.0568	0.968798	0.931417	1.26196	1.3458	0.937648	1.04412	0.958479	1.32717	1.16756	1.27175	0.887354	0.821822	1.52912	0.967439	1.26287	1.03162	0.632478	0.680532	1.11807	0.945761	0.928469	0.937437	1.04987	0.848601	1.08236	0.948308	0.943587	0.79768	0.949889	0.898419	0.96001	0.986106	0.855537	1.02093	0.705967	1.28631	1.2743	1.0176	1.0241	1.06912	1.18507
-80.0971	0.809243	0.769231	1.06688	0.795551	0.966992	0.902279	1.20505	0.946791	1.03398	1.00181	0.88871	1.40699	0.86243	0.876704	1.01263	1.26239	1.23837	1.1774	0.870062	1.00915	1.34	0.966503	1.20949	0.967927	0.652301	0.725047	1.07589	1.08157	0.909925	0.898653	0.941078	1.02037	0.958863	0.836356	1.19147	1.03653	1.16454	1.0807	1.01513	1.01401	0.817763	1.07365	0.634469	1.43112	1.12029	1.01444	1.22857	0.949887	0.938665
-80	0.789311	0.784802	1.10084	0.957005	0.877756	0.872587	0.762552	0.786361	1.23041	1.03634	1.0358	1.36874	1.08218	0.988911	0.936232	1.19186	1.20705	1.06437	0.932218	1.14897	1.15533	0.951069	1.02198	0.8023	0.845278	0.962529	1.12604	1.07948	0.733816	1.02516	0.92545	1.04939	0.955271	0.993487	0.972542	0.817398	0.884088	0.869803	1.01023	0.917664	0.81099	1.09755	0.622804	1.5135	1.44205	0.924774	0.979195	1.00034	1.00992
-79.9029	0.790426	0.741845	1.05106	0.784608	0.966543	0.877237	0.737706	0.838288	0.958351	1.14877	0.908361	1.27268	1.01317	0.958261	0.992924	1.37192	1.21553	0.913967	1.15327	1.19376	0.979553	0.947028	0.872714	0.860756	0.947469	1.01498	1.26701	0.990821	0.924214	0.896038	1.04756	0.807011	1.1651	1.06574	0.83055	0.796385	1.25488	0.965949	0.958352	0.90672	0.859655	1.00105	0.575912	1.6222	1.16442	0.83959	1.03346	1.0166	1.05961
-79.8058	0.802066	0.669625	0.959408	0.886072	0.929959	0.92757	0.738596	0.827046	1.0741	1.01916	1.00238	1.20055	1.20725	0.551095	0.800517	1.25624	1.14178	0.944914	1.23224	1.19748	0.883747	0.948683	0.742573	1.03125	1.00427	0.974918	1.1159	0.971462	0.756247	0.979754	0.967877	0.750304	1.00686	0.840594	1.06503	0.936309	1.16016	0.877644	1.07661	0.849299	0.873329	0.912423	0.641143	1.557	1.10875	0.909953	1.17369	0.894568	1.02851
-79.7087	0.873756	0.744283	0.80921	0.893132	0.994433	0.809355	1.08586	0.795221	1.04168	0.903515	1.0525	1.27154	1.02711	0.946991	0.86751	1.06371	1.27916	1.06654	1.24017	1.18067	0.827927	0.943307	0.855895	0.959169	0.957267	0.881236	1.16536	1.09926	1.01646	0.863586	0.962776	0.988012	1.07407	0.858226	1.03782	0.806876	1.06291	0.861062	1.06916	0.824445	0.821455	0.667737	0.710351	1.22949	1.45118	0.93415	1.09631	1.05597	0.929991
-79.6117	0.911309	0.812038	0.726595	0.804398	0.888253	0.907353	0.8972	1.0502	1.0971	1.1472	0.825412	1.13056	1.09413	0.830724	0.904023	1.32053	1.26961	1.23889	0.959897	1.10382	1.06851	0.919774	0.9232	0.897314	0.92247	0.8358	1.10551	1.12854	0.818684	0.92093	0.748142	0.987382	0.957344	0.962876	1.34668	0.823305	1.00172	1.01373	0.981408	1.02638	0.882332	0.741059	0.497887	1.17444	1.39846	0.877784	0.888103	1.00269	1.02977
-79.5146	0.880587	0.865987	0.779142	0.806728	0.963945	0.856509	0.794416	0.871135	0.997138	0.864581	1.02912	1.30588	0.959629	0.992441	0.82373	0.844513	1.28102	1.29491	0.82187	1.08623	1.18785	0.859927	0.898473	0.855919	0.912079	0.886856	1.17464	1.07764	0.803945	0.773598	0.835655	0.853654	0.958969	1.03924	1.08786	0.692645	1.25868	1.04178	0.987843	1.00653	0.844445	1.02487	0.574511	1.0675	1.25439	0.989093	0.862313	1.04914	0.909233
-79.4175	0.914674	0.891478	0.760307	0.91521	0.949662	0.865491	0.702361	0.868339	0.94853	0.951346	1.18571	1.19046	1.05042	0.732778	0.728029	0.934036	1.1662	1.11828	0.968339	1.18713	1.06471	0.845899	0.894219	0.925036	0.939607	0.925498	1.13848	1.07831	0.898147	0.863553	1.00668	1.0085	1.03879	1.02821	1.36299	0.929807	1.34986	1.019	1.07531	1.09107	0.852625	1.29379	0.643011	1.34682	1.35729	0.92669	0.896703	0.961414	1.01185
-79.3204	0.981167	0.902741	0.705781	0.805982	1.01423	0.854165	0.85455	0.81696	1.06226	0.994375	0.981387	1.22638	1.00987	0.657401	0.748442	1.11002	1.34058	1.00861	1.02961	1.11413	1.04147	0.854781	0.900203	1.04941	0.986094	0.957934	1.19795	1.09871	0.689327	0.719685	0.800545	0.667738	1.06313	0.879001	0.977415	0.909879	1.13602	0.938712	1.02666	1.04901	0.87196	0.950086	0.501383	1.41506	1.58138	0.912283	0.970049	0.967738	0.978216
-79.2233	0.868997	0.803141	0.806948	0.735896	1.02381	1.01607	0.601656	0.769312	0.81881	0.922932	0.918485	1.31275	0.850022	1.04301	0.913407	1.20141	1.19062	0.932421	1.04827	0.954187	1.06818	1.05982	1.10343	1.02793	0.970743	0.925645	1.19206	1.11073	0.83164	0.89694	0.882627	0.943891	1.05746	0.963938	1.05127	0.763649	1.08915	0.96554	0.814672	0.909446	0.827372	1.01208	0.533321	1.41299	1.4437	0.934084	0.837649	1.02649	0.968735
-79.1262	0.788221	0.752325	0.859781	0.88685	0.974428	0.890475	0.839108	0.824711	0.979767	0.953115	1.04281	1.12263	0.915199	0.972476	0.88457	1.15237	1.1295	0.992248	1.03593	1.21223	1.06819	1.12356	1.1486	0.989422	0.955144	0.910679	1.1568	1.07418	0.724587	0.7237	0.776377	1.11231	0.996756	1.07303	0.952755	1.0993	0.840683	0.915886	1.18669	1.04402	0.826521	1.08447	0.495991	1.55998	1.29048	0.882502	1.13566	0.991977	1.0238
-79.0291	0.770234	0.799073	0.815943	0.872126	1.05775	0.897729	1.07467	0.827782	1.00068	0.956518	1.10194	1.37233	1.06526	0.950654	0.784384	1.0662	1.12951	1.03488	1.03393	1.37519	1.03355	0.90469	0.877655	0.916842	0.939051	0.930358	1.14637	1.03499	0.762216	0.788672	0.805089	0.862141	0.944716	1.03994	1.01972	0.955596	1.00226	0.884555	0.960711	0.944897	0.813036	0.900327	0.49577	1.15261	1.08966	0.855233	0.793396	1.11687	0.834131
-78.932	0.792915	0.761022	0.860564	1.12066	1.03315	0.984756	0.671672	0.9997	0.991037	1.01514	0.758543	1.35409	1.13554	0.924936	0.857168	0.979845	1.10614	1.04312	1.05262	1.34801	0.929594	0.978957	0.863858	0.949785	1.08772	1.12204	1.08908	1.13028	0.896322	0.91013	0.733024	0.740455	0.997275	0.99524	0.811981	0.84809	1.03419	1.01098	1.13733	0.974635	0.766242	0.925633	0.582444	1.22796	1.25625	0.897266	0.92284	1.01581	1.03315
-78.835	0.835931	0.680572	0.949414	0.987053	1.02041	0.91781	0.671992	0.846206	0.99864	0.984097	0.859093	1.28995	0.90318	0.945064	0.770916	1.09143	1.04461	1.1441	1.06907	1.30209	0.97185	1.19979	0.978634	1.03549	1.31876	1.39972	0.990386	1.03074	0.764783	0.956022	0.865263	1.02388	0.945643	1.04212	1.16192	0.847131	1.35151	0.914926	1.0321	0.835256	0.831241	0.786594	0.585924	1.09137	1.18119	0.804146	0.968461	0.94752	1.02207
-78.7379	0.810347	0.821402	0.935133	0.938021	1.06283	0.957183	0.661219	0.965685	1.21681	0.953139	0.877964	1.1818	0.898122	0.866068	0.883947	0.874399	0.869238	1.29145	1.08439	1.24679	1.08721	1.08777	0.88841	0.871452	0.950465	0.979628	1.04146	1.04392	0.898079	0.85259	1.01785	1.08063	0.989082	1.05108	1.13099	1.09275	1.19599	0.856816	0.969423	1.02293	0.786197	0.871179	0.52428	1.34126	1.38415	0.906668	0.979495	1.05788	0.953542
-78.6408	0.826346	0.940958	0.930782	0.745407	1.08455	0.866283	0.81173	0.835188	0.961599	0.995408	1.06996	1.30897	0.89695	0.938265	0.753594	0.859263	1.12559	1.24757	0.996212	1.11706	0.975004	0.990011	0.857282	0.800689	0.753208	0.743682	1.03721	0.969214	0.958891	0.837881	1.04899	0.817339	1.01081	1.02967	1.28908	0.748064	1.22919	0.763972	1.14222	0.890611	0.82178	0.881858	0.58695	1.42585	1.46165	1.00052	0.904178	0.90502	0.907139
-78.5437	0.92551	1.01796	0.946292	0.962912	1.04444	0.809175	0.820677	0.837534	1.06841	1.00963	0.933704	1.31354	0.95069	0.941783	0.711948	1.30619	1.18552	1.20415	0.979439	1.01281	0.881095	0.920781	0.944346	0.916476	0.898027	0.876031	1.03124	0.96703	0.757364	0.782501	0.904399	0.799547	0.871538	1.0075	1.07719	0.962429	1.08884	1.02365	1.01336	0.976115	0.817426	0.943819	0.546084	1.20302	1.35957	1.0279	0.833488	0.98211	1.07942
-78.4466	1.05279	1.03406	0.966007	0.92595	1.00107	0.857959	0.723406	0.908265	1.05944	0.94681	1.1052	1.21116	0.946996	0.767618	0.839174	1.12624	1.2988	1.1617	1.10548	0.959536	0.823785	0.916428	0.923505	0.962863	0.944679	0.949337	1.02012	1.25109	0.7854	0.703345	0.949776	0.907967	0.971675	1.02479	1.06292	0.784153	1.00704	0.82899	0.999111	0.92174	0.836095	0.801089	0.659037	1.46287	1.1174	1.00995	0.788734	0.983124	0.861321
-78.3495	1.19412	1.01971	0.987823	0.946718	0.939583	0.942811	1.03904	0.776119	0.925377	0.942919	1.07315	1.16781	1.13736	0.954171	0.985894	1.12814	1.07974	1.11897	1.07177	1.04144	0.744007	0.944513	0.848711	0.974549	0.942248	0.993121	1.00461	1.19779	0.900197	0.7779	0.881071	1.02768	0.907258	0.922057	1.01726	0.935357	1.09908	0.875382	0.987272	0.999754	0.804404	0.935549	0.518949	1.29332	1.37517	0.940836	0.952442	0.959257	1.02408
-78.2524	1.17989	1.10716	1.00931	1.08377	0.985292	0.934448	0.823096	1.05954	1.02148	0.881863	1.06971	1.27716	0.964229	0.736103	1.15961	1.11147	1.07135	1.0761	0.958193	1.19094	0.652995	0.824956	0.923262	1.13967	1.00959	1.00856	1.06849	1.03873	0.709801	0.673845	0.896854	0.773047	0.894612	0.97705	0.88913	0.851691	0.988264	1.06288	1.02033	1.04533	0.794238	0.902957	0.5955	1.11831	1.20464	1.06962	1.01285	0.873617	0.823462
-78.1553	1.16987	1.17033	1.00637	0.977759	0.979932	0.96086	1.06926	0.930537	0.93935	1.03765	0.901101	1.26951	0.761234	0.893772	1.21412	1.04064	1.03897	1.00928	1.0704	1.04369	0.846947	0.863485	0.931149	1.26452	1.02049	0.977665	0.986107	0.96255	0.735327	0.749348	0.817416	0.934526	0.962293	0.974972	1.17331	0.80673	1.18136	0.82967	1.03922	0.917356	0.817866	0.940616	0.566452	1.11278	1.09393	0.924443	0.881101	0.977687	0.923915
-78.0583	1.1683	1.18496	0.954571	0.965551	1.02953	0.954133	0.943821	1.07947	0.851884	0.966994	0.881118	1.13405	0.912379	0.805065	1.01238	0.975077	0.99299	1.03249	1.08206	0.994224	0.925824	1.21819	0.805709	1.30883	0.918479	0.854112	1.0049	1.0133	0.63113	0.785288	0.746316	0.785794	1.05859	0.903664	1.06248	0.802284	0.772582	1.06966	1.02144	0.925214	0.866543	0.965545	0.45018	1.22602	1.11355	1.0187	0.917196	0.959093	0.879856
-77.9612	1.19688	1.19066	0.882635	0.994564	0.923181	1.07235	0.876314	0.944691	0.875955	1.0824	0.943163	1.13734	1.03244	1.26254	1.18554	0.82534	0.982367	1.23578	0.892629	1.14034	0.77455	1.23091	0.890707	1.21141	0.994557	0.944747	1.04294	1.13184	0.661351	0.708788	0.787072	0.800476	0.908648	0.990569	1.1873	0.835338	1.1249	0.870781	0.896096	0.933597	0.831768	0.669013	0.406489	1.19497	1.47151	0.849817	0.870555	0.844391	0.859209
-77.8641	1.24054	1.19191	0.800631	1.00825	0.906864	1.05018	0.808293	0.836503	1.05473	0.877812	1.02237	1.22443	0.980295	0.964088	1.39115	0.944825	1.06984	1.29465	1.034	1.1828	0.880122	1.07265	1.08093	1.04311	1.15968	1.14248	1.01199	1.06914	0.676569	0.679486	0.863231	0.636125	1.02577	0.993476	0.919495	0.997248	1.09811	0.858739	1.02841	1.06212	0.804747	0.753205	0.54202	1.20859	1.43815	1.13421	0.874193	0.867064	0.977087
-77.767	1.1468	1.37836	0.816966	0.971519	0.967874	0.853288	1.15014	0.931997	0.851676	0.863226	0.940387	1.18875	0.969758	0.985394	1.41777	1.00948	1.04115	1.28131	1.34077	1.17342	1.11412	1.05098	0.974804	1.06329	1.16266	1.11057	0.991397	1.08095	0.619215	0.645681	0.900677	0.736893	0.893294	0.936468	0.811669	0.876768	0.952182	1.05098	0.91127	0.923761	0.85091	0.686699	0.546846	0.954548	1.42207	0.975459	0.893468	0.918752	1.09579
-77.6699	1.07648	1.53405	0.889939	0.905352	0.99347	0.994051	0.768144	0.950656	0.841688	0.86631	0.92979	1.09091	1.15154	0.728319	1.31129	0.781416	1.05931	1.13667	1.21575	1.20807	0.962643	1.04183	0.914609	1.12321	1.12434	1.0879	0.94017	1.09074	0.733298	0.814045	0.868469	0.56766	0.98604	0.955774	1.17546	0.866829	1.2788	0.903043	0.954982	1.08707	0.892117	1.09174	0.572827	0.842536	0.949235	0.983188	0.88663	0.88585	0.839805
-77.5728	1.05299	1.62824	1.07619	0.794619	1.03378	0.947758	0.656892	0.993598	0.817368	0.920693	0.831813	1.04747	0.872491	0.894493	1.32174	0.82363	0.887491	1.05627	1.08549	1.24999	0.868404	1.05776	0.946265	1.2626	1.00342	1.0837	1.02428	0.978251	0.837004	0.712725	0.966776	1.07625	0.884862	0.852773	0.800542	1.06658	1.04108	0.970406	0.983056	0.917964	0.939377	0.896154	0.518829	1.07316	1.4125	0.968847	0.928578	1.00747	0.999695
-77.4757	1.02663	1.52375	1.06227	0.87823	1.0334	0.953065	0.655842	0.966647	0.957226	0.979314	0.773499	0.996812	0.950827	0.572459	1.32243	0.888305	1.07238	1.10436	0.944741	1.30645	0.888632	1.05877	0.991123	1.26865	0.888495	0.950188	0.968866	1.08091	0.703783	0.815632	1.01215	0.881365	0.865075	0.931224	1.06021	1.10305	0.965325	0.868995	0.977812	0.908321	0.843684	0.653186	0.452615	1.02761	1.36758	0.911352	0.960672	0.955502	1.13288
-77.3786	0.998834	1.31994	0.948265	0.948186	0.976366	0.961119	0.762026	0.801323	0.888216	0.947852	0.762957	1.0704	0.888836	0.947124	1.37246	0.75055	1.2809	1.09308	0.881506	1.19647	1.12985	1.05232	1.04258	1.20804	0.776564	0.752012	1.01141	0.973454	0.747086	0.81108	0.747028	0.972871	0.943645	0.992977	0.868291	0.999318	0.879144	0.936919	1.1379	1.06482	0.970344	0.848419	0.619074	1.10818	1.10236	1.03924	1.07326	1.00366	1.05339
-77.2816	1.03084	1.41813	0.926393	1.0405	0.934179	0.824879	0.781064	0.91634	0.882533	1.0636	0.887273	1.11238	0.943809	0.973167	1.25757	0.976056	0.860303	1.05212	0.857028	1.00327	1.48155	1.26125	0.979862	1.14135	0.811749	0.831087	1.03873	1.01293	0.922383	0.681785	0.760637	0.724171	0.915494	0.920698	0.702499	0.765947	0.930594	0.993081	1.02312	1.07472	0.908713	0.912138	0.5726	1.03628	1.21556	0.986171	1.05934	0.894392	1.01068
-77.1845	1.01321	1.45649	0.995837	1.26287	1.039	0.912782	0.951421	0.90444	1.21583	0.940502	0.7926	0.963576	0.952767	1.26642	1.27585	0.76024	0.977785	1.01716	1.07081	0.960926	1.28583	1.30559	0.965145	1.07177	0.867469	0.895072	0.950016	0.941097	0.592167	0.678602	0.89325	0.721505	0.904036	1.03631	0.994282	0.931933	0.903643	0.907418	1.05367	1.08381	1.07024	0.935005	0.531829	1.28185	1.39388	0.912728	1.06761	0.949692	0.979854
-77.0874	0.896297	1.37517	1.24791	0.901097	1.02432	0.869333	0.680631	1.02854	1.0553	0.860188	0.983823	1.09128	1.14499	0.748696	1.20865	0.99848	0.872103	1.00392	1.19203	0.912136	1.09005	1.02074	1.04643	0.996435	0.964262	0.928876	0.921566	1.0212	0.84121	0.565674	0.729745	0.72343	0.836459	0.921082	0.912492	1.20783	0.908844	0.862719	1.01829	1.05241	1.00543	0.892469	0.607447	1.09019	1.50768	1.00572	0.89384	1.07257	1.03482
-76.9903	0.927081	1.35461	1.23256	1.05079	0.949367	0.93378	0.931882	0.82631	1.01684	0.883508	1.09238	1.15929	0.874908	0.8829	1.0698	0.971482	0.842866	1.0341	1.12811	0.850453	0.894151	1.05379	1.07163	1.01922	1.04446	1.02919	0.972699	1.03358	0.833075	0.928227	1.08014	0.994819	0.923469	0.830919	0.960443	1.03491	1.06427	1.04078	0.984937	0.990948	0.980405	0.865199	0.575938	1.33447	1.24929	0.968516	0.898928	0.98101	0.91201
-76.8932	1.03171	1.36444	1.0835	1.03148	0.965977	0.894027	0.927499	1.09818	1.04951	0.864132	1.12284	1.11913	0.759188	0.750581	1.24597	1.29005	1.06854	0.986047	1.1744	0.936573	0.904398	1.24579	1.06879	1.09106	1.11635	1.16276	0.927338	1.00682	0.80609	0.789628	0.952524	0.741945	0.947049	1.01969	0.909112	1.05431	0.768701	0.9404	0.967173	0.983922	0.963736	0.976716	0.520071	1.06458	1.14198	0.995662	0.930235	0.953735	1.12428
-76.7961	1.03929	1.26364	1.10666	1.13023	0.994536	0.929273	0.655066	1.10864	0.993017	1.10808	0.993874	1.06582	0.87748	0.741032	1.18138	0.81678	0.878229	0.898878	1.27579	1.09659	1.01772	1.13669	0.98194	1.05903	1.17884	1.12395	0.976647	1.05919	0.902024	0.854993	1.051	0.957847	0.975188	1.04032	1.08815	0.907586	0.977878	0.975516	0.982185	0.915016	0.911646	0.776869	0.614369	1.23545	1.16675	0.999302	0.856356	1.00271	0.859571
-76.699	1.00954	1.18355	1.11175	1.0549	1.02444	0.886708	0.537219	1.00381	1.07085	1.03309	0.698283	1.09264	1.00188	0.678469	1.05417	0.967597	0.857551	0.979831	1.02119	0.992568	0.967187	1.11806	0.932242	1.04154	1.28746	1.18162	0.888907	1.05771	0.903747	0.951205	1.17925	1.26434	1.05411	0.849414	0.984616	1.21457	1.0976	0.931302	1.00579	1.00528	0.893505	0.908958	0.558503	1.14602	1.10235	0.959402	0.857237	0.916733	1.06975
-76.6019	0.905125	1.14486	1.08068	0.880175	1.04894	0.795402	0.709699	0.801401	0.893889	0.767486	0.994743	1.01126	0.948	0.870995	1.15786	1.06756	1.00438	1.05339	0.890573	1.03049	0.931078	1.28038	0.95685	1.05313	1.48832	1.43225	0.918583	0.93533	0.843005	0.792796	0.937503	0.960506	0.905436	1.01928	1.01322	0.945301	1.17648	0.912322	0.987948	1.02168	0.903666	0.770215	0.568078	1.26616	0.874045	0.901028	0.950297	0.984099	0.863922
-76.5049	0.865519	1.19574	1.09904	0.964152	1.07141	0.937115	0.613902	1.00878	0.958257	1.00643	0.87617	0.97572	1.03134	0.759895	1.16397	0.784684	0.939302	1.11217	1.00793	1.35232	0.923815	1.17923	0.93648	0.997959	1.34843	1.29295	0.942249	0.926567	1.05157	1.0195	1.18232	0.81116	1.05397	1.00319	1.01879	1.05144	0.949813	0.802168	1.01305	1.04913	0.858008	0.744316	0.503858	1.10425	1.0885	0.981978	0.975393	0.960683	0.876411
-76.4078	0.858317	1.2914	1.14211	1.0536	1.006	0.870183	1.11676	0.951833	0.751589	0.980467	0.949975	1.01311	1.02471	0.79119	1.07891	1.10433	0.853909	1.07716	0.890302	1.49691	0.995326	0.946327	0.893623	0.909409	1.03816	0.958694	0.880784	1.01301	0.982075	0.932641	1.00371	0.800186	1.07676	0.929716	0.948751	0.954769	1.04769	0.846766	1.1706	0.990195	1.00786	0.73147	0.61799	1.33058	0.956593	1.1328	1.00044	0.922612	0.953184
-76.3107	0.971219	1.15267	1.12441	1.0829	0.929192	0.887043	0.768075	0.859676	1.0847	0.949	1.15368	1.05796	0.790027	0.886931	1.07661	1.01223	0.906983	0.995258	0.655172	1.55287	1.10622	1.24811	0.915973	1.01701	0.922836	0.893396	0.945083	0.937692	0.944808	0.888768	0.864435	0.964256	0.896229	0.852151	1.16723	0.892321	0.936879	0.959758	1.12403	1.08004	0.981801	0.932733	0.539134	1.03177	1.45046	1.00435	0.856088	0.906287	1.08112
-76.2136	1.0298	1.13541	1.12261	1.01422	0.968293	0.858759	0.897382	0.810172	0.915473	0.874862	0.925682	0.979368	1.05866	0.79275	1.01193	0.780837	0.978077	1.00661	0.960794	1.23816	1.22273	1.41458	0.942946	1.05868	0.968866	0.957326	0.95358	0.928975	0.878354	0.768609	1.01057	1.04796	0.991465	0.812966	0.850613	0.725502	1.0798	0.791247	0.958871	1.04072	0.93221	0.948361	0.661532	1.12174	1.24469	0.964614	0.95686	0.947536	0.840832
-76.1165	0.979745	1.36108	1.15259	1.06115	1.03172	0.929326	0.982451	0.923178	1.01376	1.00826	0.879041	0.966998	0.995196	0.832269	1.00659	0.898343	0.959872	1.04369	1.07745	1.07871	1.19068	1.31045	0.979164	0.96846	1.33761	1.27971	1.0434	1.22168	0.986265	0.82883	1.01533	0.951661	0.986819	0.838129	0.903114	1.09263	1.05998	0.898201	1.02341	1.08875	0.912054	0.959959	0.565717	1.0907	1.33489	1.05876	0.916141	0.917403	0.901521
-76.0194	0.93895	1.52711	1.15848	1.12864	1.01437	0.955518	0.971336	0.926788	0.982084	0.885386	0.888613	1.00008	0.980835	0.943887	0.980839	0.811244	0.900944	1.13225	0.816178	1.22981	0.861489	1.25463	1.00478	0.914453	1.4019	1.36216	0.955956	1.04725	0.843944	0.783299	0.855493	0.93969	0.842065	0.818315	0.962145	0.84412	0.845048	1.00123	0.924486	1.16072	0.909583	0.919904	0.5609	1.07353	1.09622	0.876905	1.01195	0.900146	0.978141
-75.9223	0.902786	1.66332	1.15233	0.860448	1.09063	0.828453	0.591088	0.867151	1.10603	0.915864	0.800577	1.07861	1.02867	0.791366	1.04682	1.00298	0.846413	1.09904	0.815275	1.13147	0.993394	1.22297	1.02509	0.878552	1.31396	1.32463	0.961765	0.987043	0.741498	0.928317	1.0302	0.8675	0.958499	0.869504	0.845045	0.768811	0.880495	0.867853	0.894621	1.09716	0.894791	1.01986	0.59322	1.02725	1.32596	0.941362	1.04185	0.885695	0.947989
-75.8252	1.07153	1.5064	1.18742	1.08976	1.05564	0.993203	0.596623	1.01283	0.976619	0.920381	1.04081	1.05444	1.02414	1.09751	1.03235	0.836167	0.86868	1.00493	0.944559	0.908421	1.35585	1.22471	1.09127	1.0133	1.18053	1.19013	1.03484	1.00283	0.788202	0.809467	0.926938	1.04743	0.886439	0.922639	0.987706	0.830854	0.925211	0.952425	0.877946	0.927842	0.863193	0.763307	0.556027	1.04418	1.06453	0.937164	0.890536	0.954103	0.965154
-75.7282	1.25002	1.38946	1.19584	0.987429	0.960203	0.983191	0.674755	0.924218	0.91482	0.992821	0.924114	0.918137	1.1587	1.11709	0.950184	0.892053	0.82106	1.00573	0.876515	0.917737	1.22089	1.16086	1.10682	1.17153	1.07312	1.0693	0.989148	0.975124	0.932328	0.898045	0.883111	1.10844	0.989324	0.887941	0.818348	0.979955	0.950574	1.01246	0.962954	1.03547	0.81251	0.965727	0.565341	1.22582	1.07407	1.00086	0.927766	0.937955	0.886254
-75.6311	1.44799	1.35248	1.15091	1.01581	1.00699	0.914089	1.01809	0.780897	0.974689	1.07788	1.28371	0.979029	0.986387	0.772048	0.999355	0.957231	0.955586	1.00012	0.81266	0.940871	1.10773	0.965841	1.02114	1.37672	1.01778	0.975796	0.950714	1.07277	0.824486	0.934079	1.01228	0.837483	0.893507	0.912958	1.03643	0.820123	0.887713	0.94883	0.884611	0.96572	0.942879	1.06815	0.578432	1.13226	1.08792	0.94119	1.0217	0.864633	0.898057
-75.534	1.41545	1.2588	1.20458	0.965716	0.96661	1.02876	0.623134	0.97741	0.874243	0.856697	1.07034	0.935031	0.951919	1.14336	0.983454	0.905669	0.97346	0.981696	0.757187	0.991639	1.03815	0.925969	0.977054	1.37634	1.02583	0.996774	0.924689	0.882018	0.815913	0.753565	0.841588	0.835429	0.931163	0.911098	0.959331	0.939491	0.830393	1.04296	1.04523	1.10946	0.85931	0.850873	0.531295	1.13332	1.01869	0.899712	0.80414	0.98405	0.925656
-75.4369	1.26766	1.13678	1.30756	0.90166	1.05205	0.861454	0.774889	0.936079	0.967951	0.994375	1.00842	1.00978	0.991551	0.731261	0.95139	0.772395	0.927762	1.05231	0.866722	1.06149	0.91468	0.963672	0.953776	1.27318	1.06559	1.07499	0.969729	0.952834	0.863161	0.74064	0.897107	1.02837	0.942381	0.827372	0.919715	1.16326	0.898507	0.907629	1.00225	1.0228	0.902241	0.950404	0.506345	0.968468	1.19711	0.896163	0.732706	0.884659	0.807818
-75.3398	1.22723	1.47012	1.45026	1.16381	0.906056	0.84876	0.732263	0.886378	1.01005	0.789195	0.97594	0.961741	0.956574	0.869716	0.922174	1.22609	0.919025	1.16745	1.05876	1.14088	0.764258	1.23893	0.929068	1.43393	0.860889	0.898163	0.939128	0.95401	0.728222	0.880698	0.792473	0.839893	0.924894	0.939373	1.1544	0.741955	1.02912	0.878251	0.886262	1.13954	0.875761	1.13872	0.547154	1.06796	1.10552	0.996142	0.833951	0.948821	1.0729
-75.2427	1.14745	1.64811	1.46193	0.944101	0.98824	0.797341	0.789896	0.900231	0.832532	1.09189	0.758306	0.94322	0.993858	0.841628	0.984563	0.944653	0.827778	1.11561	0.87746	1.03142	0.863995	1.37007	0.906143	1.39337	0.711171	0.752129	0.908194	1.00637	0.529331	0.648125	0.934421	1.09721	0.845391	0.917652	0.931686	0.896924	0.84252	1.04979	0.908624	0.934759	0.835179	0.798799	0.513215	1.14617	0.982948	1.0856	0.940029	0.930797	0.8923
-75.1456	0.988976	1.51542	1.21152	1.10312	0.978137	0.825919	0.774387	0.856025	1.06745	0.967817	0.919175	0.956722	0.768027	0.941371	0.954632	0.988366	1.04355	1.09422	0.803528	0.970113	0.842474	1.213	0.886787	0.950207	0.671421	0.66768	0.987493	1.02316	0.711139	0.832139	0.878748	0.853756	0.931856	0.825307	0.974161	0.877638	0.85937	1.04867	0.977443	0.886969	0.863667	0.62274	0.611681	0.980736	1.26042	0.937724	0.773216	0.92931	0.908169
-75.0485	0.937598	1.4553	1.14174	0.794699	0.998093	0.982217	0.993796	0.932498	0.83583	0.876528	0.839276	1.01265	0.89354	0.972975	0.912807	0.818724	0.956009	1.13376	0.944333	1.00508	0.578438	1.08261	0.895744	0.902219	0.663071	0.652583	0.962636	1.06383	0.595962	0.654723	0.723469	0.877521	1.02489	0.846246	0.885009	0.802837	0.86154	0.895414	0.975271	0.982097	0.86066	0.758989	0.517101	0.868102	0.992671	1.0302	0.741539	0.978479	0.888227
-74.9515	0.939768	1.43146	1.16227	1.10785	0.973471	0.974299	0.633634	0.783487	1.10559	0.831535	0.934423	1.01468	0.946357	0.706645	0.84153	1.00123	0.909676	1.12601	0.839958	1.151	0.706183	0.965552	0.918859	1.05182	0.67042	0.672161	1.02186	0.863445	0.699951	0.714926	0.673518	0.962611	1.00211	0.952833	0.952571	0.978419	0.953067	0.861736	1.00899	1.00412	0.825957	0.786636	0.534555	1.14046	1.2024	0.828427	0.940725	0.9354	0.878384
-74.8544	0.976432	1.29941	0.990062	0.992878	0.940561	0.871666	0.830161	0.818629	0.992783	0.909574	1.05769	1.04717	1.05806	0.759849	0.883123	0.96223	0.817591	1.09462	0.612993	1.35239	1.02982	0.914319	0.956706	0.925164	0.923474	0.896834	0.954095	0.940611	0.652409	0.659252	0.794386	0.869094	0.897981	0.83759	1.11356	0.938913	0.884908	1.00246	0.997415	0.917533	0.823176	0.846709	0.597279	0.951569	1.18738	0.940377	0.835828	0.901834	0.950636
-74.7573	0.99385	1.20105	0.927581	1.0217	1.03265	0.890326	0.623854	0.885848	1.18676	1.01151	1.2654	0.948063	0.958594	0.952715	0.836432	0.82132	0.928849	1.05594	0.756862	1.02717	1.17976	0.959604	1.026	0.850846	1.10986	1.07433	0.991293	0.933601	0.781358	0.727808	0.748198	0.775493	0.859548	0.812481	0.814934	0.984198	1.05623	1.00384	1.04725	0.923708	0.802271	0.76293	0.515491	1.01971	1.14378	0.960721	0.961494	1.03009	0.931037
-74.6602	0.972775	1.17009	1.08454	0.994988	1.02612	0.968146	0.800955	0.928859	1.05359	0.976571	1.11111	1.00304	0.904165	0.988262	0.834558	0.832782	0.783687	1.00014	0.809937	0.827363	1.16931	1.19793	1.15821	0.881199	1.16292	1.15749	1.00769	1.1275	0.845731	0.843579	1.01159	1.14825	0.82795	0.873079	1.04759	1.09885	0.955614	0.942194	1.03095	0.921186	0.800358	0.739849	0.538626	0.885361	1.17113	0.974214	1.01202	0.999419	1.00549
-74.5631	0.959479	1.23325	1.16868	1.13953	1.03093	0.921952	0.870687	0.762857	0.962402	0.93713	0.864951	0.987076	0.968851	0.94496	0.801201	0.854823	0.795674	0.910097	0.681424	0.878385	0.838077	1.26584	1.20298	1.00702	0.979857	1.00685	1.08798	1.02853	0.778588	0.752599	0.883883	0.916998	0.887329	0.953509	0.927749	0.975752	0.963072	1.1394	1.03664	1.00583	0.864428	0.902338	0.464224	1.25141	1.28222	0.968353	0.821723	0.916379	1.0339
-74.466	0.950072	1.34349	1.2164	1.08069	1.04089	1.06614	0.770095	0.890333	1.11068	1.0998	0.949783	1.05647	0.929981	1.08058	0.829139	0.979173	0.929425	0.954518	0.660089	0.962338	0.681274	1.24856	1.20404	1.18057	0.678732	0.739312	0.926997	0.944878	0.913346	0.948948	1.01045	0.880605	0.823248	0.866004	0.738434	0.879855	0.940874	1.04577	0.91477	0.870147	0.796886	0.877434	0.446549	1.00193	1.28355	1.11977	0.907193	0.977571	1.09395
-74.3689	0.929639	1.33732	1.17529	0.853029	1.05691	0.912578	0.885136	0.748191	1.06502	1.02924	0.903886	0.906936	0.930509	0.827105	0.820886	0.777548	0.729428	1.06617	0.692341	1.06276	0.611685	1.19917	1.25565	1.15089	0.705624	0.760927	0.956651	0.91733	1.13198	0.90541	1.09587	0.850203	0.922594	0.952584	0.742878	0.866944	0.763023	0.889943	0.98719	1.01979	0.787537	0.610535	0.413031	1.46193	1.16255	0.985585	0.976991	0.974589	1.01896
-74.2718	0.963541	1.35158	1.13079	1.05294	1.05412	0.948361	0.744679	0.862559	0.982747	1.10162	1.06448	1.07406	0.913563	0.872409	0.814797	0.958286	0.789667	0.988908	0.647765	1.08944	0.808399	1.17115	1.22066	1.12284	0.792472	0.82566	1.01065	0.962875	0.749319	0.761957	0.923666	0.880605	0.862339	0.910139	0.903832	0.98592	0.783537	0.7989	0.887873	1.00022	0.847164	0.976219	0.489487	1.22307	1.15653	1.00475	0.977572	0.94947	0.959755
-74.1748	1.10611	1.40671	1.07951	1.1442	0.977846	0.811519	0.721409	1.02996	1.06532	1.00001	0.928493	1.07987	1.16865	1.2076	0.716664	0.901439	0.878585	0.960838	0.603937	1.10176	0.994052	1.18585	1.01249	1.09803	0.999235	0.976632	0.980806	1.02494	0.859873	0.784867	0.944901	0.702869	1.03012	0.934628	0.876708	0.89053	0.870822	1.03548	1.07695	0.919506	0.796497	0.642295	0.488213	1.22535	1.24052	0.944411	1.08881	0.962572	1.04053
-74.0777	1.14995	1.38739	1.19203	1.21611	0.944917	0.924458	0.702248	0.970112	1.02094	1.1364	1.02187	1.15401	0.938728	1.23607	0.783109	0.831937	0.745429	1.03116	0.561607	1.08535	1.15758	1.15986	0.954806	1.09246	1.10646	1.06783	0.886845	0.998764	0.895724	0.720057	0.834653	0.948023	0.84109	0.951004	0.820109	1.155	0.81666	0.969567	0.985247	0.903078	0.849949	0.839983	0.497305	1.1299	1.32892	1.02427	0.83001	0.820847	1.06126
-73.9806	1.14442	1.33085	1.38645	1.19457	1.09725	0.859606	0.781897	0.965824	0.890045	1.06724	0.899665	1.09011	0.972985	0.723346	0.739785	0.928864	0.8454	1.12972	0.713355	1.16342	1.17984	1.11354	0.972376	1.09649	1.16392	1.12914	0.975003	0.968803	0.618164	0.747908	0.895997	0.850179	0.929334	0.883969	0.866775	1.17437	0.982661	0.893463	0.99141	0.956827	0.795292	1.0485	0.582957	1.32613	1.44053	0.990064	1.04173	1.04991	1.0626
-73.8835	1.14904	1.37773	1.21785	1.13477	1.02616	0.882307	0.723177	0.906657	0.921574	0.869575	0.887431	1.01072	0.857367	0.791809	0.730483	1.01175	0.705263	1.24241	0.962141	1.28874	1.13147	1.10614	1.02986	1.04987	1.01388	1.00348	1.01561	1.1063	0.846549	0.901839	1.0517	1.16814	1.02133	0.95891	0.789625	0.966932	0.94038	1.13535	1.04645	0.893701	0.766533	0.777642	0.662542	1.14679	1.47249	0.998742	0.849518	0.907658	0.942478
-73.7864	1.12526	1.3716	1.04404	1.11665	0.92671	0.787017	1.05868	1.00037	1.10952	1.02271	0.870231	1.02083	1.02226	0.769002	0.686682	0.803474	0.890705	1.20126	0.870409	1.09791	0.975869	1.10116	1.12077	0.997053	0.902243	0.906149	0.998188	1.11402	0.915315	0.694472	1.10877	0.806389	0.922504	0.905272	1.1526	1.01257	0.873058	1.02033	0.964899	0.952992	0.791364	0.925239	0.657891	1.22689	1.3976	1.16959	0.813423	0.967007	1.02642
-73.6893	1.04467	1.25947	0.859847	1.16198	0.975303	0.922555	0.789086	0.897014	1.02373	0.975095	0.834686	1.00243	1.05792	1.17746	0.691414	0.820206	0.740622	1.13476	0.759133	0.99889	0.841173	1.10103	1.27853	0.931861	0.867429	0.865485	0.978261	1.06691	1.08017	0.777576	1.03028	0.831551	0.917725	1.05803	0.907224	1.07996	1.03837	0.967797	0.846752	0.80121	0.735001	0.966894	0.54333	0.919796	1.23391	0.898732	0.881355	1.02216	0.977773
-73.5922	1.25569	1.21112	1.02561	1.03721	1.01987	0.853926	0.635038	0.912072	1.14225	0.860254	0.98109	1.04672	0.907376	1.10784	0.713395	0.894362	0.846166	1.01756	0.60877	1.0835	0.748294	1.20488	1.30301	1.0131	0.904483	0.900664	0.942146	1.15082	0.867282	0.834624	0.840371	0.9822	0.935393	0.937205	1.09574	0.870964	0.972076	0.836082	0.808724	0.837604	0.823293	0.800058	0.581838	1.10891	1.20316	1.02503	1.18087	1.01615	0.822658
-73.4951	1.61251	1.19466	1.36634	0.957675	0.961418	0.803636	0.728427	0.74354	0.947489	0.829045	1.07597	1.11756	0.904158	0.952493	0.693131	0.84282	0.855351	1.03629	0.696313	0.961438	0.911443	1.36072	1.26084	1.16755	0.977472	0.973764	0.939292	0.979943	0.899396	0.950645	1.04699	0.853654	0.910376	1.00167	0.872261	1.05525	0.895918	0.901507	0.911748	0.903073	0.8677	0.794278	0.568231	1.14031	1.38374	1.00048	1.06175	0.972865	1.12888
-73.3981	1.38465	1.23225	1.18864	1.1693	0.94789	0.843	0.687273	0.994166	1.06668	0.792177	1.02276	1.14079	1.0453	0.687488	0.809496	0.747165	0.781301	1.12298	0.902811	0.736034	1.20261	1.41382	1.26083	1.00572	1.07439	1.08301	0.939225	0.963741	0.798297	0.967008	0.888336	1.01551	1.04681	0.996222	0.903069	0.769491	0.892105	1.11095	0.936455	1.00609	0.807072	0.814741	0.568155	0.964937	1.11666	1.03443	0.956755	0.963038	0.966774
-73.301	1.19431	1.28403	1.07466	1.05356	0.949833	0.826918	1.14877	0.926817	0.831659	1.0346	0.960633	1.22272	0.8879	0.770754	0.942682	0.970134	0.705929	1.10448	0.895169	0.971892	1.32809	1.41311	1.23169	0.940644	1.15777	1.16127	0.885354	0.867902	0.908349	0.885392	0.879168	0.956357	0.950867	0.904672	0.969449	0.956478	0.973276	0.851755	0.968757	1.08959	0.801486	0.688225	0.539496	1.123	1.08383	1.22209	0.889784	1.10997	0.870709
-73.2039	1.07905	1.36421	1.08813	0.814296	1.11183	0.866802	0.845579	0.810525	0.812013	0.944132	0.842988	1.04437	1.14675	0.916594	1.11186	0.954536	0.777665	1.10421	0.880737	1.20321	1.39633	1.30478	1.14426	1.06906	1.21406	1.17756	0.909903	0.949819	0.803299	0.861075	1.19657	1.16886	0.824191	0.776515	0.898485	0.813735	0.983299	0.87507	0.973217	0.988586	0.845083	0.568647	0.545476	1.09438	1.22297	1.12926	0.992221	1.05877	1.00799
-73.1068	1.08578	1.2527	1.1587	1.09801	0.883148	0.941722	0.909239	0.92205	0.887771	1.02138	1.0506	1.08937	0.866533	0.959586	1.30387	0.766721	0.685704	1.14041	0.852724	1.42545	1.3501	1.22081	1.09082	1.08715	1.03549	1.00083	0.889975	0.942625	0.709356	0.65805	0.964745	0.933078	0.753213	0.913057	0.85764	0.937021	0.780437	1.13352	0.99281	0.971508	0.867308	0.53122	0.660488	0.983585	1.17616	1.04018	0.857885	0.990143	0.942626
-73.0097	1.15351	1.04536	1.25782	0.998238	0.944833	0.957132	0.891014	0.805492	0.887091	1.02599	1.05551	1.05246	0.969472	0.703645	1.08688	0.828283	0.705789	1.13979	0.873082	1.32477	1.28375	1.14901	1.05436	1.05009	0.739497	0.727605	0.923884	0.990471	0.799668	0.906556	0.931802	0.907889	0.802402	0.797964	0.873663	0.999007	0.828493	1.07097	0.920244	0.923305	0.78184	0.821399	0.588275	1.10518	1.27417	1.05867	0.823739	0.943832	0.986809
-72.9126	1.10617	1.05665	1.14921	1.05174	0.910788	0.768863	0.96886	0.979587	0.856393	0.938894	1.17215	1.093	1.05192	0.897892	1.0156	0.884207	0.741737	1.12077	0.917626	1.06262	1.20735	1.25333	1.0059	1.1776	0.814643	0.777047	0.965028	1.00322	0.728132	0.878839	1.00364	1.15962	0.935256	0.902783	1.2805	0.951277	0.967228	0.957579	1.08022	1.00855	0.835375	1.08261	0.454734	1.0581	0.913401	0.990113	1.05676	0.967939	1.032
-72.8155	1.07365	1.05734	1.13801	1.183	1.05967	0.986752	0.774467	0.849865	0.98825	0.948081	0.961622	1.049	1.07542	0.96063	1.09846	0.755069	0.803224	1.05692	0.863373	1.08311	0.84369	1.31339	1.00961	1.21152	0.879862	0.833532	0.973273	0.863429	0.895458	0.792841	0.921995	1.16789	0.850427	0.844707	0.847105	1.0064	0.871649	0.937562	1.30835	1.01028	0.839995	0.688623	0.561027	0.817736	0.972911	0.847553	0.84728	0.956348	0.951709
-72.7184	1.07079	1.03682	1.32162	1.08493	1.07637	0.947197	0.455607	1.07208	0.852195	1.15927	1.01527	1.13826	0.878708	0.902719	1.12722	1.08977	0.727982	1.05097	0.836981	1.08518	0.675086	1.28495	1.11769	1.05824	0.925226	0.904103	0.95039	1.07245	0.849324	0.808672	0.836946	1.11068	0.982852	0.879588	1.07274	1.27358	0.821769	1.03705	0.91248	0.958543	0.79815	0.85112	0.725831	1.07117	0.889655	1.10293	0.944514	0.978059	0.888549
-72.6214	1.04976	1.05624	1.45222	0.926446	0.996889	0.910541	0.726659	0.932901	1.06127	1.00326	0.821918	1.13753	0.997916	1.03555	1.06936	1.03896	0.808286	1.16083	0.866312	1.05039	0.896588	1.21941	1.11163	0.885652	0.838802	0.825197	0.95244	1.05931	0.966215	0.843941	0.982447	1.04565	0.924821	0.788277	0.999306	1.09905	0.997755	0.914373	1.03443	1.10226	0.829407	0.998612	0.587678	0.945159	1.0696	1.00045	0.871296	0.890471	0.991689
-72.5243	1.01965	1.09564	1.55631	1.31485	0.994404	0.935749	0.936665	0.858036	0.791192	0.86946	0.931715	1.08725	1.05356	0.959115	1.08541	0.91671	0.836593	1.17998	0.907786	0.972002	1.03874	1.13531	1.0485	0.703405	0.686484	0.671553	0.984922	1.00127	1.04029	0.939249	1.04671	1.12689	0.911287	1.02658	0.916081	1.08236	0.960713	1.16586	0.899564	0.908937	0.841627	1.0013	0.648249	1.03994	1.15176	1.07507	0.990936	0.933185	0.962624
-72.4272	0.974931	1.01006	1.23311	0.775399	1.0083	0.874775	0.7795	0.880247	1.10051	0.836793	0.790331	1.06614	1.05882	0.710441	1.04392	0.828649	0.834932	1.15378	0.955331	0.871818	1.14122	1.20284	1.01132	0.765163	0.900906	0.801139	0.939163	0.998706	0.913543	0.931067	0.977175	0.849956	0.878768	0.840621	0.819992	1.15922	0.996376	0.92552	0.866615	1.03771	0.845462	0.910082	0.638508	1.09806	1.20589	0.993102	0.943866	0.912715	0.845155
-72.3301	0.953883	0.987511	1.00353	0.926632	1.01903	0.884958	0.952209	0.827173	1.05035	0.985032	0.883666	0.958881	0.883716	0.842393	0.999922	0.830803	0.851009	1.20061	0.833441	0.995602	1.1916	1.26724	0.931396	0.807402	1.13691	1.00487	1.02365	1.12	0.996183	0.800934	0.981063	0.677733	0.899249	0.817778	0.947129	1.00185	0.968843	0.952358	0.900424	0.886849	0.811133	0.961117	0.617668	1.01992	0.959966	0.977048	0.888844	0.890011	0.845118
-72.233	0.980183	1.09101	0.961187	1.10562	0.995935	0.831674	0.978503	0.886222	0.993505	0.911795	0.923712	0.966596	1.01636	0.953657	1.05512	0.92671	0.78785	1.24132	0.826412	1.07764	1.17432	1.32539	0.76598	0.810602	1.41608	1.3569	1.00357	0.938256	1.06042	0.974835	0.954066	1.05153	0.933493	0.96681	0.806703	1.10434	1.1176	0.977719	0.916291	0.93978	0.822125	0.744494	0.644499	1.11041	1.18914	0.940178	0.934594	0.888366	1.02218
-72.1359	1.0129	1.13131	0.959796	1.07743	0.980182	0.80919	0.652305	0.935225	1.10197	0.978252	1.02197	0.917438	0.835176	0.701746	0.991255	0.934518	0.838629	1.26978	1.04911	1.07621	1.02172	1.3026	0.770159	0.858122	1.2496	1.23451	1.03069	1.06383	0.918694	0.818855	0.686777	0.732837	0.981624	1.04216	1.00323	0.86648	1.10919	1.31923	1.01715	0.904047	0.810556	0.881158	0.659996	1.01323	0.924005	0.96189	0.923999	0.931708	0.898512
-72.0388	1.04883	1.14003	0.978879	0.965351	1.02135	0.833343	1.33992	0.885123	1.1148	1.01461	1.21934	1.12588	0.918545	0.76472	0.942734	0.950075	0.852977	1.24245	1.12639	1.07032	0.898891	1.23934	0.859137	0.927803	0.860288	0.874907	1.03707	1.15739	0.82889	0.87102	0.933916	0.918779	0.991965	0.953734	1.0018	1.03572	1.10158	1.10112	1.17615	0.823091	0.807359	1.1095	0.487713	0.998872	1.10364	0.9007	0.949743	0.966364	0.860146
-71.9417	0.961105	0.998176	1.29455	1.06486	0.89666	1.10429	0.847142	0.912631	1.30192	0.998571	1.09232	0.914643	0.856307	0.999033	0.927847	0.94194	0.808174	1.18722	1.13097	1.06221	0.790944	1.28753	0.917563	0.980703	0.860572	0.819261	1.04774	1.09208	0.832135	0.756945	0.830808	0.836919	1.09124	1.00123	0.790436	1.27389	0.943291	0.902204	1.17552	0.833792	0.76748	0.996542	0.577076	1.17818	0.956942	0.941052	0.765508	0.921207	1.02287
-71.8447	0.913162	0.889274	1.42057	1.30531	1.0097	0.9744	0.909227	0.987612	0.956695	1.19141	1.04698	1.06164	0.900694	0.985762	0.837803	0.970844	0.837621	1.19422	1.05075	0.985871	1.13944	1.38855	0.962028	1.05442	0.964677	0.886072	1.0198	1.03436	0.853323	0.766434	0.908797	0.867374	0.928724	0.988106	0.934233	0.989627	0.998962	1.2059	0.977154	1.00577	0.896414	0.763341	0.618539	0.85759	0.958737	1.06919	0.894095	1.02425	0.946711
-71.7476	0.944782	0.846274	1.16726	1.17212	0.983043	1.01271	1.04761	1.01137	0.931603	1.10904	0.962095	1.17247	0.79987	0.968268	0.980435	0.762798	0.736299	1.15912	0.970293	0.94738	1.32214	1.59525	0.978569	1.16975	1.27642	1.1978	1.01824	0.941483	0.792424	0.803389	0.84374	0.748038	1.08424	1.01381	0.977137	0.982421	0.933341	0.933239	0.998004	0.969252	0.840568	0.834351	0.62397	1.0519	0.914827	0.995877	0.769414	0.948334	0.837084
-71.6505	0.966069	0.933565	1.23285	1.163	1.03917	1.07302	0.93542	0.824044	0.881301	1.2117	1.16122	1.15321	0.912334	1.05955	0.919656	0.875996	0.947336	1.03984	0.889348	0.984575	1.17327	1.54099	0.99066	1.20784	1.18167	1.14867	1.0419	1.07264	0.992911	0.959284	1.02651	0.815933	1.01958	0.937942	1.34987	0.780439	0.994549	1.08752	1.06727	0.939195	0.792068	0.630654	0.551986	1.07281	1.04942	1.11636	0.879144	0.977425	0.885605
-71.5534	0.98219	1.086	1.45788	1.03096	1.0327	0.912023	1.04624	0.979558	0.93997	0.980262	1.05845	1.1889	0.912384	0.574989	0.817941	0.879284	0.875234	1.11956	0.948869	1.09634	1.0313	1.35625	1.00053	1.20729	0.88368	0.919127	0.984686	1.08623	0.853285	0.71298	0.741074	0.916018	0.962789	1.10363	1.00828	0.798715	1.06017	0.978928	0.991915	0.969487	0.781519	1.10826	0.577482	0.862041	1.19829	1.11433	0.954656	1.00277	0.876096
-71.4563	0.870745	1.0127	1.11801	0.984548	1.01265	0.887508	0.914477	1.14984	1.03621	0.991435	0.963855	1.15026	0.984988	0.895611	0.917575	0.838225	0.904481	1.29878	1.07862	1.24539	0.892799	1.53442	1.0694	1.15585	1.1364	1.07398	0.991703	1.09705	0.920728	0.839285	0.82764	0.917117	1.08959	0.814148	1.03308	0.926345	1.05328	0.988313	1.06347	0.889794	0.793235	0.917189	0.680229	1.12455	0.965088	1.23025	1.05182	0.936216	0.88828
-71.3592	0.802326	0.964817	0.87144	0.999913	1.0125	0.932834	1.00369	0.959476	1.04091	0.984786	1.03736	1.12044	0.808368	0.935426	0.852354	0.894841	0.766842	1.15101	0.908341	1.08316	0.986231	1.60023	1.10978	1.12063	1.25158	1.13672	1.0404	1.05643	0.854016	0.818188	0.775366	0.845439	1.03492	1.02378	0.897384	1.00938	0.831507	1.02434	0.994447	0.90684	0.81012	0.971707	0.636519	1.06524	0.971693	1.05196	0.845148	0.971841	0.903206
-71.2621	0.819959	0.967749	0.811462	1.2735	1.04658	0.953464	0.890089	0.986905	1.198	0.91677	1.16348	1.14502	0.83349	0.937854	0.830687	0.799607	0.843086	1.04607	0.791386	0.91872	1.06154	1.44133	1.09318	1.11786	1.09168	1.01525	1.08738	1.1784	0.884599	0.925097	0.949681	0.779386	0.958373	0.828659	1.02256	0.953126	1.0536	0.877402	0.850298	1.01423	0.81696	0.802	0.617525	0.857275	0.960406	1.0914	0.920869	0.954225	1.09413
-71.165	0.863405	0.975034	0.795644	1.04343	1.04747	0.972602	0.964455	0.93705	0.978415	1.08989	1.08622	1.09639	1.08036	0.83096	0.794821	1.12766	0.900278	1.02678	0.781087	0.74987	1.10062	1.46834	1.0765	1.14517	0.985663	0.923527	0.953761	1.24611	0.873769	0.882885	0.945464	1.03932	1.00644	0.784228	1.04999	0.909421	1.0107	1.06796	0.974513	0.956846	0.875286	0.90917	0.605542	0.975716	0.752838	1.14733	0.831006	0.949848	1.02891
-71.068	0.919758	0.984495	0.801905	1.15416	1.06487	0.942165	0.756264	0.865051	1.09442	0.965267	1.13297	1.25819	1.02891	0.820911	0.897094	1.1878	0.851531	0.994404	0.800036	0.8575	0.98906	1.58833	1.05977	1.18753	0.906582	0.846669	0.99877	1.04022	0.964635	0.967148	1.0934	0.877326	0.895736	0.897018	1.03235	0.954547	0.942671	1.11129	1.00026	1.04578	0.771324	0.882231	0.548399	1.02002	0.981603	1.06415	1.00621	0.885914	1.01846
-70.9709	0.875254	0.878869	0.898695	0.944452	1.0456	0.874747	0.883355	0.760316	1.01208	1.07208	0.876109	1.22724	1.02987	0.816747	0.815959	0.954229	0.899259	0.955486	0.833609	1.10337	0.802183	1.60909	0.897423	1.23487	0.965538	0.932424	1.00513	1.11044	0.794527	0.851041	0.989615	0.921481	0.828633	0.892951	0.907583	0.971949	0.975663	1.10411	0.881857	0.882051	0.814528	0.938254	0.542618	0.839036	1.00758	1.15801	0.991318	0.972186	0.957618
-70.8738	0.836318	0.833999	1.00343	1.21623	0.996161	0.993828	0.851981	0.918322	1.19022	1.29801	0.849609	1.33098	1.07045	0.782273	0.756332	1.05273	0.846627	0.97692	0.783843	1.14448	0.752395	1.5803	0.830754	1.25077	0.983076	0.964017	1.00494	1.17924	1.01281	0.781959	0.814116	0.808043	0.871461	0.771646	0.922864	0.928683	0.950889	1.1567	1.00124	0.816588	0.781979	0.815601	0.643069	0.83675	1.11631	0.870629	1.1734	0.966233	1.08172
-70.7767	0.808518	0.910643	1.12407	1.02168	1.00017	0.957461	0.860827	0.776492	0.872186	0.947967	1.11395	1.1431	0.987095	0.879103	0.737824	0.936266	1.02047	1.01191	0.764353	1.21707	0.736737	1.4524	0.955436	1.20378	0.91778	0.887285	0.983903	1.02666	1.0846	0.696032	0.921751	0.939989	0.845419	0.861549	0.85389	1.00089	0.902368	1.14291	1.01493	0.880445	0.836812	1.07194	0.619312	1.02473	0.946395	1.06325	0.886526	0.869717	0.994954
-70.6796	0.830774	0.887464	1.07308	1.10036	1.04611	0.855231	0.733483	0.975162	1.00449	0.994789	1.06356	1.2769	0.973705	0.721978	0.765392	1.12606	0.948898	1.07402	0.805415	1.35262	0.789335	1.47142	1.0181	1.2078	0.821257	0.808601	0.983591	1.10615	0.810996	0.852982	1.07288	1.04002	0.899385	0.889855	0.764053	0.945372	0.921882	1.07978	0.942748	0.987611	0.815513	0.993318	0.468826	1.00818	1.16006	1.01962	1.006	0.918566	0.869958
-70.5825	0.878058	0.814373	0.93628	1.01288	1.06311	0.914817	0.890191	0.842428	1.08508	0.940478	1.03933	1.20396	0.979878	0.764073	0.707285	1.26159	0.998134	1.09177	0.811613	1.19572	0.847679	1.5639	1.04974	1.23733	0.709121	0.728942	1.00757	1.199	1.05621	0.798336	0.863351	0.990194	0.87797	0.833042	1.03067	0.797471	1.09313	0.948089	0.935453	0.933334	0.834648	0.696604	0.56406	0.993678	0.968437	0.975384	0.977896	0.94703	0.932277
-70.4854	0.732575	0.891342	1.09539	1.03747	1.03227	0.848931	0.870595	0.975191	1.05526	1.06008	0.9954	1.20116	1.06352	0.705322	0.685586	1.13579	0.855168	1.08733	0.800378	0.892605	0.908896	1.48509	0.999367	1.17964	1.15866	1.18769	0.995137	1.17504	0.848898	0.812068	0.843157	0.951798	0.912432	1.01545	0.863127	0.92312	0.909699	0.992106	1.01891	0.97066	0.851432	0.862388	0.476312	0.960377	1.20776	0.98193	0.840128	0.98133	0.875598
-70.3883	0.720808	0.898581	1.09532	1.07908	1.03002	0.887787	0.575726	0.964627	0.89889	0.939194	1.11256	1.13943	0.988215	0.783127	0.703178	1.11624	0.985347	1.0683	0.756193	1.12708	0.842199	1.38227	0.956499	1.13376	1.33841	1.36425	1.03113	1.09286	0.976539	0.719983	0.759862	0.919171	0.967628	0.873704	1.02773	0.98235	1.1329	0.907395	1.0319	0.938006	0.838279	0.764549	0.618937	1.01683	1.10595	1.11224	0.757987	1.0022	1.00473
-70.2913	0.976472	0.766359	0.776862	1.1263	1.01322	0.914606	1.0992	1.01877	1.04339	1.00277	0.910034	1.20352	0.962164	0.75523	0.806347	0.795587	1.01432	1.03022	0.708202	1.24931	0.796361	1.23143	0.928646	1.11152	0.978559	0.976406	1.02742	1.0705	1.07675	0.770378	0.756047	1.09184	0.861735	0.936236	0.992777	1.01439	0.940788	1.0748	0.955304	1.02682	0.7673	0.789732	0.640197	1.03602	1.16331	1.02595	1.05925	1.02511	1.07446
-70.1942	1.03287	0.827754	0.790813	1.12313	1.03449	0.951696	0.891526	1.18571	1.11727	0.889533	0.855267	1.16561	1.23666	1.03287	0.725339	0.77801	1.23248	0.954034	0.652602	1.14706	0.79224	1.24561	0.987416	1.14886	0.844567	0.850677	1.07427	1.14773	0.996904	0.877478	0.999083	0.873993	1.01114	0.91489	0.911138	0.989881	1.04544	0.962386	0.841633	0.858914	0.897114	0.84081	0.642902	0.903365	0.861611	0.968608	0.886734	0.926258	0.897077
-70.0971	0.989639	0.985957	0.970967	1.01936	0.955413	0.962193	0.808088	0.831607	0.948329	0.916456	1.17251	1.13659	1.13806	0.782802	0.697702	0.95194	0.989649	0.892511	0.5766	1.05944	0.812209	1.3423	1.0895	1.216	0.823503	0.856006	1.06829	1.05646	0.841365	0.683185	0.841271	0.975179	0.960803	0.915488	0.981096	0.812629	1.01566	1.009	1.04901	0.989935	0.860381	0.758065	0.516853	0.903386	1.00865	1.03343	0.901479	0.912233	0.986317
-70	1.05835	0.919424	1.00993	1.09022	0.985458	0.874762	0.700455	0.882661	1.10325	0.913403	0.915979	1.27155	1.19412	0.723037	0.727605	1.20849	1.01643	0.838319	0.490397	0.979153	0.844224	1.2739	0.950412	1.09787	0.953537	1.0282	1.09622	1.06342	0.937219	0.952858	0.86855	0.798303	0.858525	0.961732	0.836455	1.02171	0.854625	1.12786	0.942814	0.894236	0.713446	0.77412	0.524905	1.09621	1.3995	0.916171	1.05744	0.898821	1.01945
-69.9029	1.10178	0.915978	0.988981	0.958575	0.929926	0.929727	0.915345	0.959603	1.03265	0.971394	0.991054	1.20497	0.91177	0.938237	0.774979	0.76449	1.07242	0.951503	0.710893	0.999029	0.849432	1.21451	0.887677	1.06887	1.02901	1.11036	1.10334	1.01291	0.899381	0.720498	0.724605	0.946897	0.889922	0.83102	0.924614	0.913042	1.191	0.971459	1.11968	0.823981	0.885041	0.656519	0.492634	0.912693	1.23948	0.972171	0.93748	0.9679	1.00349
-69.8058	1.09463	1.03871	0.848218	0.950197	1.01761	0.91212	0.818177	0.963587	0.921524	1.10102	0.942382	1.31084	1.01724	1.14686	0.923356	0.966094	1.03075	1.0443	0.859723	1.03339	0.852124	1.17316	0.97764	1.21813	0.995365	1.01244	1.17795	0.991996	0.885037	0.84834	1.06841	0.955444	0.857395	0.869707	0.894397	0.949074	0.848501	0.958585	0.926788	0.846284	0.827839	0.732534	0.595207	0.974093	1.09807	1.05461	1.01639	1.04819	1.1641
-69.7087	1.06663	0.987445	0.785743	1.28917	0.94074	0.862059	0.713694	1.16417	0.789312	0.929856	0.985005	1.47365	1.11763	0.831622	0.860623	1.15928	1.12356	1.09631	0.865219	1.09673	0.849787	1.18358	0.978537	1.17287	0.997467	0.954351	1.13115	1.05706	1.15876	0.918902	0.965104	0.940243	0.884061	0.924819	0.867864	0.952045	1.00765	0.86036	0.947753	1.0336	0.813162	0.954145	0.551851	1.2221	1.16239	1.05626	1.15878	0.994423	0.926881
-69.6117	1.02819	0.849189	0.762413	1.11174	0.979538	0.85117	0.812391	1.04916	0.869854	1.03579	0.854809	1.25463	1.11607	0.759982	0.833336	1.25526	1.2695	0.975384	0.783998	1.04758	0.77335	1.21988	0.934902	1.03036	1.01744	0.916177	1.04741	1.11896	1.02242	0.949604	0.995316	1.03912	0.856729	0.956336	0.877065	1.00627	1.12315	1.02634	0.979762	0.933267	0.788472	0.673114	0.481352	1.02375	1.34058	0.963841	1.00499	0.978077	1.01082
-69.5146	1.1309	0.835847	0.715422	1.21702	1.03863	0.947747	0.727743	0.818913	0.938075	1.07752	0.902677	1.4156	1.18621	0.90859	0.830385	1.04833	1.34202	0.767984	0.659418	0.942179	0.659864	1.16853	0.98816	1.0249	0.980876	0.886935	1.01464	0.92045	1.3295	0.875392	0.971345	0.821557	0.878494	0.85502	0.995625	1.14555	0.92699	0.828429	0.938653	0.982285	0.803567	0.931999	0.530715	0.997067	1.26531	0.931894	0.932797	1.0128	0.975689
-69.4175	1.17108	0.829648	0.725973	1.3975	1.07273	1.0313	0.743218	0.710901	0.934105	0.977178	1.15069	1.43824	1.10462	0.849293	0.880918	0.917458	1.35204	0.908184	0.646153	1.12037	0.947579	1.11967	1.02403	0.967434	0.958167	0.89153	1.04662	1.01513	1.06712	0.959362	1.04555	1.03751	0.916927	0.872358	0.694337	0.902793	1.03176	1.02161	1.02663	0.920956	0.894458	0.884411	0.530129	1.02392	1.08351	1.04812	1.14546	0.938102	0.838979
-69.3204	1.08621	0.837736	0.851611	1.02976	0.994155	0.836181	0.656608	0.828752	0.777446	0.967091	1.0581	1.36619	1.15053	0.903395	0.818274	1.02304	1.36491	0.945261	0.610851	1.19586	1.03725	1.07577	1.0251	0.805934	0.963174	0.963801	1.0013	0.850792	1.1008	0.877004	1.01797	0.807181	0.866253	0.896667	0.793342	0.921056	0.801892	0.949867	0.951412	0.884123	0.94717	0.958788	0.530023	0.893455	1.20127	1.12096	0.938024	0.940194	0.970494
-69.2233	1.03716	0.841641	0.919551	1.35463	1.00185	0.870519	0.622632	0.864384	1.0419	0.954935	0.868673	1.1652	1.06395	0.896378	0.839024	1.16803	1.28166	0.776091	0.531476	1.06596	0.730829	1.10845	1.02693	0.767804	0.889938	0.896172	1.024	0.87894	1.37856	1.05754	0.878259	1.02544	0.888792	0.842492	0.752291	1.07197	0.988168	0.944198	0.981583	1.06391	0.821868	1.02399	0.535185	0.877545	1.12454	1.04521	0.998631	1.00094	1.02583
-69.1262	1.00603	0.843454	0.958641	0.896564	0.943811	0.867195	0.76997	0.927779	0.916312	1.14046	1.04758	1.43825	1.27715	0.685002	0.818535	0.912842	1.382	0.801241	0.493783	0.929262	0.878883	1.17942	1.02912	0.79136	0.777581	0.758595	1.0603	0.841854	1.07823	0.878276	0.955138	0.964528	0.857423	0.849594	0.910651	0.979563	0.983869	1.03907	1.00747	1.01312	0.890942	1.11638	0.541719	0.97049	1.05753	1.1154	1.09999	0.984532	1.09022
-69.0291	0.873321	0.791552	0.787167	1.03653	0.999294	0.862719	0.684797	0.979491	0.980255	0.942512	1.12662	1.22483	1.29289	0.97917	0.779012	0.807455	1.23511	0.923549	0.476931	0.789158	1.25417	1.19159	0.828826	1.05642	0.81502	0.825527	1.08565	1.16264	1.10497	0.890884	0.848618	1.02921	0.957201	0.872223	0.909029	0.836107	0.87649	1.02528	0.884187	0.971346	0.814564	0.646007	0.454654	1.24534	1.02575	1.28376	1.12367	0.981336	1.00358
-68.932	0.890473	0.75474	0.749759	1.10969	0.917018	0.847524	0.945954	0.772509	1.0567	0.967662	0.755057	1.27117	1.0268	0.719624	0.760211	1.0645	1.20076	0.855298	0.472031	0.919861	1.18091	1.2099	0.688663	1.13827	0.812759	0.839441	1.05638	1.00174	1.05521	0.853702	1.04106	0.881228	0.938605	0.993215	0.761957	0.897839	1.12878	0.990191	0.907132	0.903434	0.878558	0.786517	0.591688	1.21432	1.20639	1.16942	1.07798	0.973773	1.08984
-68.835	1.20736	0.748107	0.980481	0.971591	0.996078	0.816128	0.858842	1.09634	1.16311	1.19959	1.03472	1.14711	1.12681	0.844496	0.836976	1.01638	1.21826	0.798883	0.489907	0.999416	1.14503	1.24049	0.668759	0.853677	0.731097	0.747318	1.08778	0.96939	1.22033	0.833758	1.05795	0.853194	0.867118	0.908242	0.942869	0.836374	0.917421	0.861147	0.963276	0.882552	0.930313	0.891574	0.5356	1.03814	1.15647	0.988533	1.10721	0.959861	1.12601
-68.7379	1.27692	0.707027	0.964689	1.16242	0.972248	0.899145	0.874042	0.934498	0.891009	0.888746	1.08296	1.18036	1.05411	0.913944	0.779409	1.10156	1.08758	0.766141	0.553333	0.976673	1.18393	1.17419	0.760498	0.826634	0.820283	0.823079	1.0817	0.953246	1.11864	0.926865	1.02272	0.984842	0.92199	0.98528	0.933678	0.806787	0.831411	1.19233	1.01641	0.985409	0.955505	0.821573	0.591209	1.11399	1.25131	1.02443	1.09902	1.03554	1.16144
-68.6408	1.22282	0.648723	0.82564	1.10572	0.954268	0.677922	0.840238	0.823798	0.884901	0.939542	0.984005	1.30303	0.96587	0.922214	0.751215	1.60576	1.1727	0.790166	0.631863	0.999485	1.13641	1.05945	0.908059	0.928367	0.994892	0.982782	1.08625	1.08706	1.15902	0.840989	0.79817	0.84786	0.852429	0.934945	1.13069	0.941238	0.886067	0.908856	0.928041	1.03133	1.01767	0.907274	0.526277	1.01058	1.03716	0.905525	0.872734	0.903951	1.03473
-68.5437	1.28342	0.752042	1.05865	1.08787	0.993528	0.872256	0.929966	0.906303	0.900627	0.91285	1.02128	1.12588	1.04694	0.951964	0.735295	1.11208	1.16219	0.842574	0.717945	1.04507	1.04567	1.11054	0.786384	0.792073	1.3888	1.31615	1.00137	0.965395	0.957728	0.764199	0.967778	0.916606	0.911568	0.893749	1.03495	1.02457	0.781264	1.02825	0.962346	1.18781	1.02662	0.773048	0.523875	1.35624	1.04015	0.89766	1.01267	1.03561	1.15867
-68.4466	1.2959	0.845905	1.13027	1.05393	0.885403	0.780481	0.800145	0.758992	0.809193	0.91374	0.977613	1.27025	0.978955	0.800473	0.743212	1.12387	1.38916	0.899622	0.666758	1.09387	1.17004	1.15188	0.730708	0.76215	1.50154	1.44009	1.0715	0.948659	0.962937	0.885585	0.937448	0.788308	0.820589	0.891363	0.859736	0.802627	0.857689	1.03726	1.05719	1.27767	0.993255	0.876548	0.550127	0.986882	0.914316	0.940811	0.985048	1.01159	1.03464
-68.3495	1.21213	0.920855	0.879099	1.08161	1.02315	0.855398	0.942781	1.03733	1.12814	0.918958	0.747491	1.13544	0.912509	0.641759	0.70793	0.922343	1.17664	0.901597	0.651951	1.11374	1.24279	1.17375	0.807027	0.944969	1.05196	1.1452	1.00618	0.907375	0.96052	0.888735	1.00922	0.848959	0.885106	0.894695	0.883296	0.838665	0.82444	0.90741	0.878515	1.21013	0.991293	0.897825	0.52954	1.08017	1.03899	0.740591	0.853098	0.999903	1.11433
-68.2524	1.18519	0.821699	0.793413	1.06821	1.05655	0.932273	0.851856	0.927367	0.947676	0.968422	1.08754	1.23905	1.30025	0.884061	0.739826	0.801782	1.15137	0.793425	0.709902	1.07577	1.2123	1.20514	0.866739	1.07284	1.00805	1.035	0.968036	1.12731	1.0283	0.877959	0.786284	1.1699	0.936568	0.935367	1.05772	0.965744	0.965562	1.05357	0.972201	1.09059	0.953063	0.94054	0.548489	1.32583	1.05043	0.917513	1.26181	0.930194	0.966802
-68.1553	1.18667	0.635488	0.79047	1.16105	0.993192	0.872644	0.689488	0.749014	0.882585	1.02536	0.939826	1.25817	0.948112	1.0569	0.683236	1.25626	1.2676	0.850114	0.786677	1.06733	1.03064	1.24128	0.918147	1.17324	1.16697	1.01715	1.00953	0.984853	0.951578	0.944407	1.06276	0.696555	0.861002	0.933397	0.7194	0.946509	0.975605	0.977976	0.986602	0.933838	0.982952	0.839139	0.547429	1.07102	1.05434	1.13268	0.974916	0.95983	1.04
-68.0583	1.0902	0.630978	0.756261	1.1209	0.854549	0.781353	0.588839	0.835561	0.770807	1.21357	0.907844	1.12058	0.946743	1.0333	0.643856	0.921881	1.11609	0.989233	0.872864	1.07367	0.773408	1.30844	0.909266	0.991142	1.2849	1.19899	1.01691	0.965818	0.853879	0.86668	0.763188	0.843812	0.864385	0.933767	0.935102	1.145	0.876974	1.00667	0.860653	0.909189	0.971506	0.858363	0.535654	1.11331	1.22414	0.890465	1.10237	1.03851	1.21279
-67.9612	1.01675	0.659031	0.807615	1.04068	1.06944	0.945278	0.83823	1.09359	1.03166	1.06543	0.992098	1.02742	0.99444	0.852132	0.674747	0.970327	1.23317	1.15841	0.725433	1.02639	0.865484	1.36717	0.900467	0.92126	1.26506	1.22479	1.08111	1.0665	0.852303	0.685081	0.820803	0.902709	0.767117	0.920435	0.85066	1.03747	1.07118	1.16983	1.05609	0.995527	0.95271	1.05079	0.539265	1.26486	1.04462	1.11708	1.18192	1.0698	1.22396
-67.8641	0.989374	0.75221	1.03009	1.25288	0.931062	0.855323	1.01885	0.793729	0.891002	0.98586	1.10503	1.15201	1.13875	0.82556	0.764489	0.991693	1.14676	1.22391	0.653473	1.00062	0.945144	1.40905	0.891831	1.0758	0.969662	0.938508	0.930007	0.861787	0.899327	0.788187	0.812628	0.83957	0.897674	0.89396	0.831325	1.15782	0.799334	1.02924	0.97398	0.986203	0.953473	0.743841	0.515205	1.08545	1.20697	1.0008	1.10997	1.02311	1.11065
-67.767	1.00855	0.799074	1.04489	1.0345	0.887421	0.800845	0.739339	0.92467	0.943445	1.19006	1.00577	1.20913	0.975801	0.837096	0.797099	0.980865	1.27763	1.08205	0.732451	1.01788	0.999973	1.53561	0.854049	1.03612	0.953188	0.931782	0.964356	1.02468	0.98879	0.778755	1.14027	1.05243	0.877354	0.966095	0.805614	0.949627	0.943452	1.03512	0.922241	0.874245	0.981632	0.915672	0.55814	1.22037	1.06216	0.982136	1.01473	1.0818	0.97944
-67.6699	1.051	0.822781	0.955851	1.21892	0.97549	0.855001	0.559861	0.798704	1.08126	0.924179	0.957015	1.28008	0.976625	0.913297	0.843234	1.18661	1.37142	1.11141	0.76025	1.10376	0.988781	1.70451	0.801693	0.899333	1.07617	1.06483	0.941312	0.920723	0.823525	0.935269	1.04506	0.952879	0.940627	0.944561	0.923051	1.20271	0.873894	0.883994	0.852131	1.02657	1.05321	0.907414	0.506588	1.26209	1.19502	1.13017	0.955513	1.05784	1.07461
-67.5728	1.11366	0.834567	0.836675	1.20202	1.01223	0.90455	0.630039	0.884329	1.09062	0.906365	1.09243	1.08288	1.21805	0.8043	0.95324	0.988693	1.18191	1.22639	0.76246	1.22396	0.944579	1.5458	0.85325	0.97805	1.05906	1.06978	1.02318	1.0011	0.754684	0.681054	0.908398	0.788512	0.895068	0.911287	0.808589	0.917092	0.928321	0.765902	0.978184	1.1483	1.10737	1.01853	0.469404	1.1577	1.25144	1.04994	1.04047	1.01311	1.12509
-67.4757	1.09253	0.834053	0.794375	0.979237	0.906863	0.825028	0.536421	0.866218	1.09437	0.908765	0.96326	1.17808	1.0609	0.633903	1.06673	1.19424	1.07767	1.13767	0.694605	1.30668	0.947283	1.45335	0.898632	1.00875	1.10347	1.11622	0.963408	1.08295	0.792237	0.7673	0.934087	0.639824	0.821422	0.973408	0.854921	0.946749	0.962452	1.10426	0.954264	1.05095	1.13675	0.855831	0.566513	1.05327	1.01512	0.873899	1.03572	0.981939	1.06719
-67.3786	0.903847	0.808938	0.905826	1.06567	0.989737	0.792269	0.751254	0.907019	0.92525	0.920381	1	1.05037	1.11998	0.892889	1.22905	1.06927	1.06492	1.069	0.667632	1.28112	0.953435	1.49343	0.931663	0.943434	1.27092	1.24566	0.95121	1.11103	0.882342	0.776859	0.835887	1.08339	0.874278	0.895416	1.06301	0.941873	0.804573	0.929387	0.918212	1.13046	1.08754	0.847256	0.505564	1.17444	1.14524	1.17043	1.2494	0.991066	1.18024
-67.2816	0.889004	0.734049	0.928269	1.19119	0.884451	1.06896	0.665475	0.954316	0.803486	1.11796	1.03575	1.20154	0.967042	0.952539	1.31974	1.13943	1.10289	1.04045	0.722424	1.03901	0.966485	1.52568	0.904524	0.93793	1.16649	1.12735	0.932778	1.023	1.05022	0.83572	1.01208	1.03855	0.860605	0.868213	0.892499	0.83551	0.979332	0.932853	0.948717	1.03805	1.13782	1.0484	0.555659	1.16696	1.11302	1.13752	1.16228	1.00613	0.98555
-67.1845	0.961084	0.634273	0.906207	1.02515	1.09827	0.928741	0.741255	0.950923	0.842377	0.91899	0.715186	0.982727	1.14923	1.20843	1.09747	0.933229	1.23206	0.9267	0.776439	1.16297	1.02185	1.55403	0.847299	0.962333	0.926126	0.885156	0.934148	0.988488	1.0134	0.921175	0.930975	0.957405	0.947244	0.757654	0.928328	0.840138	0.865981	0.899184	0.945469	1.13577	1.14726	0.888567	0.542587	0.855581	1.29301	0.968255	1.2444	1.07783	0.865264
-67.0874	0.978965	0.6615	1.01839	1.06148	0.99538	0.929784	0.840398	0.924287	1.04069	0.994563	0.905444	1.08979	1.2879	0.914901	1.14766	1.00344	1.18063	0.770359	0.830067	1.46997	1.09837	1.47887	0.821084	0.905603	1.29171	1.28314	0.891045	0.74382	0.985448	0.969299	1.02404	0.883461	0.920959	0.991319	0.882298	0.845778	1.05077	1.04688	0.922752	1.10353	1.02284	1.09293	0.500474	1.13895	1.3034	0.855687	1.16396	1.09456	1.15652
-66.9903	0.968647	0.682012	1.03868	1.2481	0.956393	0.783985	0.62892	0.829969	0.923263	1.18251	0.821322	1.10719	1.14881	0.764293	1.15241	0.901284	1.06532	0.799735	0.963092	1.35579	1.25753	1.42101	0.873166	0.88624	1.41702	1.42339	0.930744	1.04211	0.957071	0.97366	1.05942	1.10632	0.917663	0.94261	0.975448	0.881448	0.970184	0.855787	0.88643	1.22096	1.03165	0.754346	0.592545	1.16609	1.37215	0.894614	1.04742	1.10716	1.10257
-66.8932	0.901931	0.689093	0.875203	1.1915	1.07723	0.933791	0.759871	1.22369	0.856828	1.04217	1.09264	1.0403	1.06891	0.716253	1.09555	0.798224	1.26323	0.849776	1.03589	1.23025	1.3552	1.39775	1.08184	0.941611	1.06181	1.0482	0.877416	0.868506	1.11369	1.01066	0.871701	0.949539	0.886214	0.877934	0.835192	0.930746	0.937318	1.00832	0.857233	1.04548	1.06468	0.736088	0.522722	1.20608	1.12037	0.916622	1.14357	1.06057	1.04471
-66.7961	0.879293	0.777497	0.827233	1.132	1.00039	0.850124	0.755431	0.999141	1.12086	0.927049	0.986922	1.10586	1.0359	0.940002	1.07975	1.0885	1.18924	0.941143	0.988234	1.08199	1.32987	1.41766	1.00667	0.914668	0.870629	0.863363	0.850067	0.966233	0.914904	0.980321	1.15732	0.920986	0.90598	0.978843	0.921359	1.07216	1.0975	1.1086	0.878138	1.24336	1.15054	1.03563	0.530157	1.12789	1.32202	0.892062	1.11643	1.22981	1.05269
-66.699	0.878694	0.906563	0.837017	1.16842	0.985682	0.834198	0.68433	0.823239	0.90829	0.994519	0.934843	1.11672	1.27141	0.800473	1.07727	1.14024	1.14165	0.989386	0.845802	1.012	1.20163	1.45915	0.789581	0.846568	0.761456	0.773695	0.914	0.904484	0.886377	0.933425	0.96272	0.968976	0.857062	0.87693	1.04867	1.01986	1.15682	1.04893	0.928728	1.106	1.08989	0.978221	0.565778	1.17969	1.07937	0.940046	1.14174	1.11622	1.0786
-66.6019	0.870531	0.751082	0.879585	1.17353	1.02381	0.931194	0.823622	0.878659	1.04967	0.783999	0.77533	1.11814	1.1219	0.938516	1.02619	1.05527	1.03218	1.01606	0.655982	0.981139	1.02193	1.3366	0.825216	1.02249	0.760713	0.733113	1.00685	0.818385	0.999152	0.936563	0.923718	0.955163	0.951694	1.0106	1.32013	1.05602	0.975958	0.991372	1.01721	1.1369	1.05439	0.927325	0.559439	1.12497	1.20352	1.00448	1.31914	1.13212	1.03718
-66.5049	0.858781	0.685566	0.929791	0.894983	0.990953	0.963013	1.05969	0.942857	0.872186	0.891818	0.855179	1.1676	0.995735	1.03596	1.00012	1.07135	1.21796	0.928777	0.817101	1.1401	1.01072	1.31516	0.871709	1.11852	0.797036	0.756731	0.996319	0.925135	0.998063	0.944366	0.916294	0.988582	0.858388	0.817794	0.826961	0.971439	0.859418	0.919944	1.02412	1.06819	1.03864	0.852684	0.549245	1.07669	1.0499	0.974743	1.22966	1.08175	1.05412
-66.4078	0.839857	0.799978	0.99527	0.980252	0.948209	0.91806	0.886802	0.913141	1.12428	1.01645	0.893737	1.21581	0.847702	0.839245	1.00106	1.13429	1.23134	0.899479	0.906303	1.256	0.951814	1.49594	0.939917	1.05479	0.907492	0.90875	0.980753	0.935147	1.04639	0.970727	0.869815	1.17587	0.948285	0.906863	0.914078	1.08691	1.05866	0.963006	1.00239	1.03622	1.02181	0.77094	0.519137	1.08084	1.32202	1.02513	1.14756	1.08795	1.11671
-66.3107	0.902151	0.813443	1.08154	1.07423	0.931913	0.918384	0.853946	0.832058	0.857223	0.786566	0.772413	1.20069	0.909395	0.742767	0.987551	0.934921	1.03138	0.986161	0.851669	1.28577	0.797508	1.61669	1.01233	0.980921	0.918937	0.953797	0.921418	0.928711	1.07924	1.05883	1.29044	1.10183	0.949176	0.849756	0.939129	1.09531	1.03118	1.10051	0.980709	1.07758	1.00178	0.734162	0.582833	1.11846	0.997618	0.908734	1.16324	1.20631	1.10008
-66.2136	1.00506	0.776433	1.17821	0.999916	1.02857	0.785555	0.87466	0.954316	1.07777	1.00485	0.835798	1.34151	0.993387	0.829578	0.966367	1.04321	1.2187	0.964341	0.828537	1.24066	1.02099	1.70743	1.08685	0.901991	0.880878	0.945358	1.03165	0.796548	1.21636	0.832315	1.00468	0.961298	0.913773	0.863995	0.968014	0.997323	0.958097	1.04405	0.988748	1.14141	1.03367	0.967825	0.540602	1.43591	1.00814	0.872664	1.39196	1.07481	0.97243
-66.1165	1.01129	0.840063	1.0358	1.14064	0.878913	1.05247	0.801297	0.817441	0.89988	0.978486	0.906207	1.2982	1.13009	0.955511	1.03328	0.886668	1.09213	0.88827	0.821155	1.15811	1.43337	1.66535	1.00877	0.984001	1.02403	1.00856	0.981644	0.915467	0.95697	0.888038	1.16097	0.959825	0.952627	0.988349	1.11872	0.940767	1.24158	0.901317	1.05223	1.06114	0.977799	0.639013	0.569883	1.24197	1.36426	1.0898	1.34533	1.01402	1.0138
-66.0194	0.992554	0.824566	0.890354	1.16473	0.9853	0.888326	1.02889	0.986181	1.18889	1.05924	0.921068	1.26911	0.916835	0.777845	1.02586	1.343	1.17758	0.828986	0.73603	1.16529	1.0914	1.61036	0.926966	1.02706	1.10942	1.03531	1.03384	0.807881	0.984626	1.16468	0.941297	0.935532	0.867686	0.962083	1.08486	0.779074	1.32645	1.03821	0.904569	0.982671	1.00031	0.796547	0.550567	1.19804	1.35856	0.999616	1.06115	1.03534	1.11139
-65.9223	0.923865	0.650814	0.738832	1.01679	0.937499	0.962158	0.761834	0.955179	1.07918	0.875083	0.929561	1.34136	0.884001	0.876425	0.983688	1.2364	1.11444	0.840462	0.699849	1.17232	0.890128	1.52953	0.837723	0.992206	1.07931	0.989174	0.940793	0.747638	0.933924	1.18761	0.949736	1.06488	0.848292	1.03169	1.06433	0.945822	0.943956	0.972117	1.041	0.911042	1.13128	1.19791	0.49177	1.1241	1.42397	1.03684	1.03561	1.10068	1.18455
-65.8252	0.895734	0.609076	0.760267	1.12385	1.00208	0.961937	0.734248	0.807112	0.877407	0.954988	1.01503	1.28475	0.767663	0.854679	1.04016	1.23128	1.0963	0.99346	0.761558	1.17903	0.970277	1.50787	0.865931	1.02774	1.14868	1.09063	1.06937	0.848157	1.02807	1.1082	1.09795	1.34919	0.853659	0.821854	0.843783	1.13289	1.24497	0.949957	0.948504	1.1166	1.08129	0.722267	0.553522	1.22589	1.27596	0.965143	1.15165	1.03242	1.10498
-65.7282	0.887882	0.633346	0.868181	1.03238	0.971376	0.88341	0.760646	0.842772	0.926434	1.00354	0.880977	1.21526	0.965479	0.872512	0.946452	0.915958	1.17122	0.965544	0.780256	0.968428	1.07493	1.51579	0.952865	1.09847	1.26778	1.26589	1.02062	0.948928	1.13411	1.05992	1.01643	1.2296	0.955813	0.950357	1.20186	1.14026	1.13314	0.969302	0.978075	0.997537	1.11565	0.941668	0.697131	0.781873	0.809821	0.876353	1.29894	0.916988	0.935053
-65.6311	0.832573	0.719321	0.937218	1.0066	1.08196	0.857851	0.993647	0.830951	1.01851	0.916205	0.876634	1.23327	1.09428	0.65172	1.01578	1.1117	1.12481	0.847172	0.77745	0.649165	1.19184	1.44567	0.963225	0.978413	1.12376	1.18968	0.996905	0.947377	1.02713	0.929507	1.0199	1.09136	0.961314	0.89152	1.23956	0.927553	0.773343	1.03859	1.02216	1.04386	1.02959	1.04131	0.732423	0.978135	1.14644	0.92036	1.19291	0.984038	1.21776
-65.534	0.7513	0.772343	0.913253	1.14302	0.953723	0.873505	0.863314	0.838033	0.970427	0.93779	0.839992	1.22385	0.888376	1.00635	0.965314	0.995943	1.20968	1.05729	0.790921	0.851272	1.09359	1.39091	0.972179	0.965111	0.99715	1.09438	0.968304	0.821198	1.09438	0.959399	0.924695	1.12156	0.929759	0.74157	0.933492	1.03044	0.751468	0.858157	0.996969	1.08409	0.97717	0.816153	0.684954	1.32837	1.30004	1.12142	1.14339	1.09331	1.00088
-65.4369	0.618099	0.759459	0.703282	0.977905	0.91856	0.914464	0.776886	0.818539	0.970209	0.937656	0.986414	1.21443	0.825629	0.722316	0.891721	0.950288	1.25281	1.16659	0.776762	0.999017	1.00761	1.36686	0.978323	1.16532	0.90537	0.960922	0.973747	0.920593	1.00725	0.999682	1.09214	1.00297	0.967458	0.867853	0.866925	0.940932	1.03889	0.994331	0.966706	0.960289	1.04755	0.971287	0.812513	1.04921	1.25904	1.05358	1.08021	1.08901	1.22484
-65.3398	0.736715	0.71103	0.758715	1.00374	1.0192	0.94723	0.995338	0.911524	1.08545	1.01308	0.790479	1.15517	1.10372	0.800445	0.947636	1.28703	1.24532	1.07427	0.707343	1.03803	0.946167	1.33565	0.964957	1.17972	0.877653	0.852156	1.00906	0.820158	1.08378	1.06558	1.05531	1.08102	0.906381	0.874926	1.01081	0.977866	0.994998	0.979451	0.995406	1.00662	1.05009	0.777692	0.604067	1.20844	1.16488	1.00294	1.40639	1.03546	1.10582
-65.2427	0.981239	0.644829	0.946849	0.98967	0.935061	0.847603	0.847908	0.761159	0.954473	1.01044	0.840852	1.11451	1.01337	0.80143	0.817224	1.1007	1.02361	1.04912	0.758682	1.21067	1.01153	1.30086	0.941837	1.10121	0.881969	0.755738	0.998455	0.907634	1.24402	1.21703	1.10224	1.39168	0.893222	1.03147	0.911947	1.17197	0.972439	0.857112	0.862456	1.23721	1.04886	0.936473	0.789158	1.37971	1.04758	0.851234	1.11093	1.1541	1.10999
-65.1456	0.888596	0.700197	1.02799	0.999468	1.05606	1.14127	1.06439	0.857978	0.921373	1.03849	0.848138	1.05397	0.969498	0.723139	0.789744	0.992172	1.00543	1.05756	0.870399	1.45011	1.14029	1.21311	0.933077	1.21459	0.80486	0.720465	0.86578	0.81237	1.25764	1.24148	1.2484	1.11533	0.983703	0.861052	0.877449	1.13743	1.11439	0.77226	0.929316	0.987276	1.02615	0.920345	0.707303	1.08637	1.36059	0.853751	1.31809	1.1744	1.00677
-65.0485	0.840212	0.743987	1.02674	0.827857	0.895497	0.951832	1.06173	0.881699	0.821319	0.942853	1.09708	1.12111	0.780951	0.949052	0.916437	0.986212	1.10606	0.963513	0.853863	1.15013	1.46862	1.1518	0.960341	1.25932	0.801529	0.757343	0.919447	0.94304	1.13072	1.24361	1.03886	1.13967	0.999089	0.931694	0.974682	0.896708	0.991278	0.854243	0.965491	0.979105	1.01821	0.775041	0.80098	1.26539	1.05202	0.84886	1.33433	1.00068	1.06088
-64.9515	0.880345	0.76462	0.860687	0.827657	0.991944	0.890703	1.00677	1.13907	1.01769	1.01786	1.18141	1.12127	1.02024	0.995488	0.98382	0.85261	1.10698	0.868416	0.859864	1.00269	1.57835	1.14335	1.05965	1.16679	0.945755	0.938523	1.01058	0.966831	0.885079	1.1371	1.04023	1.41366	0.939084	0.969892	0.824774	1.01874	0.977744	1.05531	0.906201	0.889228	0.99821	0.972393	0.727432	1.33174	0.916706	0.88862	1.06713	0.968643	0.882308
-64.8544	0.805069	0.755877	0.870346	1.07474	0.975944	0.90166	0.852816	1.07543	0.830829	1.04988	0.924816	1.06065	0.903961	1.02552	1.15354	1.05256	1.10537	0.771219	0.910941	1.16037	1.2509	1.17969	1.03485	1.15301	0.947164	0.9377	1.00207	0.974631	0.982993	1.17171	1.21281	1.27969	1.04126	0.824918	0.957977	1.09802	1.00876	1.05789	1.01539	1.15052	1.06442	0.784108	0.707321	1.0973	0.797362	0.869635	1.02286	0.935759	1.15624
-64.7573	0.672089	0.732445	0.967861	1.19514	0.934084	0.858443	0.820814	0.982973	0.970805	1.00197	0.842146	1.17285	0.921954	0.931366	1.32308	1.19834	1.14492	0.840314	0.979368	1.12051	1.20031	1.23843	0.947985	1.1786	0.877165	0.845878	0.936615	1.01992	1.03352	1.02144	1.07641	1.26136	0.871817	0.95907	0.767341	1.26847	0.90582	1.01414	1.04849	1.12397	1.04358	0.859572	0.686821	1.08332	1.14917	0.856437	1.10757	1.02481	1.15666
-64.6602	0.892699	0.664575	0.846111	0.99703	0.907304	0.953424	1.09095	0.739724	0.956571	0.949538	0.981974	1.2436	0.889091	0.757409	1.33563	0.826322	1.10709	0.992556	1.05647	0.981889	1.28816	1.32807	0.97287	1.05543	0.964814	0.946651	1.00832	0.937746	1.05332	1.22413	1.33885	1.27923	0.952723	0.922183	1.07465	1.08403	0.755253	0.849794	0.956453	1.08525	1.11819	1.0967	0.655627	1.24116	1.05252	0.793138	1.16343	0.956025	1.17779
-64.5631	0.986149	0.647668	0.777245	1.01824	0.923189	1.01516	0.904834	0.887253	0.883592	0.938431	1.02709	1.05191	0.964452	1.01712	1.41358	1.0915	1.25483	0.954884	0.956533	1.13468	1.18566	1.3379	1.00598	0.967146	1.01376	1.0095	0.94301	0.774617	1.14152	1.01914	1.18428	1.22263	0.904554	0.905596	0.803889	1.06603	0.791297	0.939515	0.816103	1.14759	1.01525	0.81924	0.616166	1.23389	1.26437	0.883054	1.11681	0.951873	1.11519
-64.466	0.825278	0.732687	0.814147	0.90507	0.958455	1.13183	1.08674	0.837995	0.970888	0.986041	0.799229	1.08172	0.967582	0.725214	1.38571	1.21253	1.05038	0.963247	0.917207	1.26318	1.1109	1.1881	1.05553	0.948639	0.985307	0.996509	0.921868	0.74441	0.988229	1.14665	1.36324	1.12931	0.900296	0.887815	0.808289	0.964353	0.94794	0.979564	0.942513	1.0589	1.04927	0.758921	0.604395	1.10088	1.05776	0.96739	0.973374	0.953573	1.02034
-64.3689	0.784651	0.787931	0.808982	0.918924	0.991145	0.8349	0.754084	0.912162	0.846263	0.923855	0.992386	1.1071	0.971839	0.763881	1.39329	1.04987	1.10544	1.06368	0.999103	1.34308	1.09163	1.30542	1.06067	1.00829	0.932262	0.958147	0.853818	0.890552	1.10846	1.31136	1.32069	0.864323	0.930345	1.04791	0.953022	1.16045	0.893617	0.909749	0.891859	1.02996	1.12601	0.981278	0.558494	1.04068	1.25448	0.930026	0.998863	1.02283	1.12815
-64.2718	0.804147	0.828288	0.782783	0.941803	0.957823	0.929337	1.02987	0.784429	1.02732	0.811728	0.870662	1.07503	0.802429	0.917226	1.46766	1.05902	1.28458	0.943514	0.986414	1.15704	1.17802	1.5563	1.04361	1.10703	0.866921	0.9071	0.905443	0.907972	1.23814	1.34561	1.22638	1.2385	0.903755	0.892895	0.954747	0.919735	0.964934	1.00935	1.12146	1.01029	1.00161	1.03263	0.663099	1.29018	0.99027	0.931558	1.12082	1.0159	1.05371
-64.1748	0.749393	0.781131	0.863983	0.846957	0.978018	0.829844	1.12694	0.857144	1.05515	1.05849	1.05726	1.10347	1.04326	0.722801	1.35372	0.988307	1.09927	0.713043	0.926433	0.838019	1.31723	1.34455	1.12237	1.07318	0.72411	0.690155	0.926825	0.882243	0.951947	1.3734	1.08368	1.53365	0.805028	0.925326	0.875862	0.982452	0.972172	1.10059	1.21609	1.1039	1.05899	1.03353	0.494066	1.12875	1.0102	0.765375	0.797209	1.08403	0.982798
-64.0777	0.717022	0.736694	0.980758	1.09157	0.954648	0.849806	0.747944	0.818029	0.951476	0.826297	0.892625	1.03695	1.00991	0.958438	1.37711	1.0802	1.20901	0.818079	0.987381	0.93083	1.27525	1.16317	1.17388	1.11175	0.635551	0.57129	0.886343	0.77435	1.17558	1.40032	1.25008	1.09884	0.986865	0.892821	0.879486	0.96554	0.824375	1.08528	0.979878	0.951271	0.999859	1.04931	0.533195	1.05456	1.03259	0.993622	0.967869	0.987666	1.00605
-63.9806	0.729418	0.697694	1.16868	0.823782	0.971516	0.939413	0.759813	0.753212	0.955882	0.975168	0.950098	1.03642	0.877314	1.10148	1.44529	0.924711	1.06987	0.878866	1.01325	0.983814	1.20002	1.04252	1.17089	1.29515	0.6555	0.648586	0.851225	0.955082	1.38081	1.31019	1.49222	1.42858	1.00098	0.906032	0.987499	1.12898	0.974627	1.07479	0.912594	1.05663	0.992198	0.79991	0.502718	1.08828	1.03634	0.905053	1.10851	1.00279	1.01351
-63.8835	0.720763	0.693648	1.05669	0.986317	0.905568	0.952753	0.787956	0.763944	0.875207	1.06046	1.01149	1.14072	0.960855	0.8333	1.28878	1.11576	0.931182	0.851155	0.968959	0.957144	1.05829	1.12959	1.12605	1.17007	0.785584	0.803337	0.863521	0.827963	1.11557	1.40292	1.51321	1.29288	0.930596	0.953278	1.00566	1.11941	0.790669	1.0021	1.19067	1.04502	1.00199	0.806564	0.507306	1.02081	0.825963	0.872606	0.8746	0.944426	0.956783
-63.7864	0.701582	0.707077	0.794734	0.855955	0.930441	0.848471	1.34568	1.03141	1.12076	0.937447	0.897318	1.04573	0.958556	0.921743	1.34577	0.836877	1.03693	0.867897	1.03839	0.995174	1.09459	1.32053	1.06029	0.890734	0.970737	0.996816	0.891975	0.881195	1.38664	1.31554	1.38012	1.1603	0.917667	0.97763	0.876847	1.05156	0.975292	1.11176	0.976882	1.12237	1.04349	0.963797	0.555483	0.908969	0.957241	0.921711	1.23302	0.894416	0.984177
-63.6893	0.677003	0.719546	0.758931	1.0149	0.931857	0.754111	0.826715	0.929859	0.710777	1.00886	0.814633	1.108	0.985073	0.758775	1.31081	0.820475	1.0434	0.906865	1.16468	1.06555	1.2199	1.18308	1.13277	0.87941	0.841835	0.856265	0.910369	0.952879	1.07293	1.11972	1.20687	1.00267	0.930208	0.943572	0.884475	1.2323	1.10507	1.00903	0.83511	1.01838	1.05194	0.888427	0.473699	0.916182	0.992738	1.00123	1.05494	0.990594	0.93698
-63.5922	0.654515	0.742386	0.756721	0.956902	0.935535	0.949019	0.955793	0.786538	0.900576	1.17279	0.914045	1.14648	0.944927	0.90772	1.17784	1.10343	0.931588	0.865775	0.893776	1.07846	1.18533	1.10176	1.12745	0.850204	0.876404	0.865161	0.858222	0.884025	0.986623	1.42638	1.20185	1.16752	0.865282	1.01211	0.912827	0.781379	0.973095	1.15435	0.913524	1.02104	0.986639	0.881964	0.594009	0.963866	0.928236	1.03364	1.10085	0.876891	0.975726
-63.4951	0.636208	0.785967	0.821696	1.31949	1.02901	0.87909	1.08625	0.978607	0.846371	1.03811	1.00998	1.10702	1.09785	0.782436	1.33658	0.857302	0.810246	0.843363	0.700124	1.08047	1.09247	1.13272	0.966574	0.785233	1.23792	1.17295	0.924878	0.844471	1.2326	1.12549	1.23755	1.20587	0.818294	0.851088	0.861842	1.03879	0.820219	1.18577	0.992891	1.24597	1.04336	0.869356	0.570641	0.978888	1.04787	0.828887	0.970536	0.855248	0.920999
-63.3981	0.744752	0.854232	0.871224	1.26157	0.916264	0.930433	0.829795	1.00652	0.817897	0.833798	0.83719	1.13492	0.995288	0.739707	1.16851	0.976039	1.03412	0.858308	0.66098	1.06069	0.883066	1.14464	0.865317	0.883443	1.24671	1.20504	0.888525	0.77897	1.05414	1.25483	1.32647	1.29551	0.914481	0.956637	0.998439	1.16437	1.03618	0.955824	1.04939	1.0803	1.00458	1.08942	0.538702	1.0647	1.04609	0.889666	1.10345	0.944103	0.93288
-63.301	0.916719	0.934837	0.913028	1.04468	0.890901	0.83911	0.951261	1.14922	0.915726	0.758423	0.86349	1.34046	0.885073	0.753434	1.05829	0.823147	0.832741	0.885901	0.645583	1.0514	0.9663	1.14703	0.793872	1.06324	1.07914	1.09929	0.894664	0.901348	1.3417	1.21568	1.13217	1.23892	0.963507	0.81424	0.878709	0.894308	0.899772	1.02434	0.979179	1.03916	1.0586	0.82924	0.510472	1.01616	1.08337	1.12033	0.824864	0.9784	0.848228
-63.2039	0.821687	0.971872	1.01393	1.23731	0.868705	0.904818	1.02257	0.897023	0.985079	0.8649	0.944064	1.19202	0.947008	0.914415	1.18105	1.06177	0.791022	0.919817	0.642058	1.04736	1.19586	1.05014	0.905466	0.855499	1.0521	1.06479	0.871546	0.742166	1.11302	1.16864	1.31062	0.910191	0.893065	0.849612	1.15628	1.11338	0.948757	1.02254	0.906561	1.11537	1.11404	1.05482	0.517713	0.880135	1.04145	0.826013	0.982046	0.958551	0.965939
-63.1068	0.803909	1.02953	1.1087	1.09283	1.01576	0.901224	1.24313	0.917586	1.04672	1.05396	0.910113	1.08513	1.20443	0.640508	1.09466	1.06817	0.967372	0.901216	0.836479	1.07638	1.24028	1.03154	1.00092	0.763111	0.976855	0.976646	0.830103	0.807745	0.971506	1.26158	1.36687	0.961222	1.00178	0.935908	0.888654	0.869922	1.06449	1.06996	0.972118	1.01332	0.9432	0.880628	0.494288	0.879482	1.15487	0.966789	0.962921	0.958542	0.93009
-63.0097	0.940642	1.12844	1.19122	0.97484	0.925535	0.828903	0.96774	0.936943	0.988227	0.911206	0.652719	1.07368	1.02485	1.21158	0.986874	0.98152	0.986183	0.946256	0.958279	1.115	1.23915	1.16954	1.06409	0.90144	0.805181	0.781196	0.775261	0.852172	1.13977	1.09613	1.00485	1.10444	0.856514	0.971973	1.10126	0.858091	0.931116	1.09344	0.942497	1.12336	1.06143	0.71379	0.487749	1.075	0.926127	0.950339	0.950878	1.01268	0.886449
-62.9126	1.0043	1.1626	1.1426	0.918279	0.897022	0.863726	1.05099	1.05941	0.964964	0.982038	0.725974	1.14644	0.899226	0.867613	0.997284	0.831937	0.962903	1.11858	0.934837	1.17284	1.14689	1.11773	0.99206	0.829239	0.857242	0.836717	0.86192	0.845595	1.01678	1.28126	1.30495	1.24424	0.987886	0.930701	0.873465	0.807625	0.92016	1.00413	0.776784	1.21518	1.06256	0.684348	0.517051	0.903497	0.932235	0.952732	1.13405	0.919901	0.902863
-62.8155	1.03142	1.16438	1.02841	0.942972	1.01281	0.886379	0.753845	0.691692	1.01894	0.99152	0.890163	1.03215	1.02815	0.825738	1.00505	0.950461	1.03229	1.21883	0.989245	1.10865	1.04278	0.971013	0.852432	0.651773	1.02117	1.01772	0.892059	0.831771	1.36292	1.0401	1.33782	1.15386	0.889281	0.859116	0.849155	1.02036	0.972344	0.958307	0.90509	0.966344	1.09308	0.722594	0.509001	0.959671	0.960825	0.886011	0.955791	0.882036	0.920906
-62.7184	0.939528	1.11341	1.06773	0.983665	1.00737	0.852681	0.641885	0.86051	0.899924	0.901592	0.85235	1.19054	0.936819	0.82119	1.0067	1.35171	0.937842	1.28305	1.08258	0.983464	0.932731	1.02689	0.955021	0.720186	0.968556	0.995891	0.874452	0.814529	1.06194	1.17338	1.41995	1.51804	0.921914	1.00916	0.990718	0.781005	1.02166	0.923894	1.00645	0.963198	0.961378	0.620268	0.544103	0.983522	1.22656	0.880577	1.03607	0.943935	0.881569
-62.6214	0.859945	1.09374	1.11094	0.845295	0.93627	0.928098	0.774422	0.943279	1.22185	0.979602	0.726159	1.03888	0.917882	1.02334	0.984324	0.730874	0.942918	1.06304	1.09204	0.990627	1.00459	1.13723	1.03209	0.796731	0.928968	0.983794	0.933362	0.856317	1.19648	1.11029	1.09477	1.43075	0.932142	0.963945	0.87497	1.01959	0.871553	0.982827	0.906092	1.06691	0.987445	0.80304	0.551538	1.09796	1.06505	0.8957	0.94732	0.961506	0.858396
-62.5243	0.804979	1.13667	1.16193	0.880405	0.957649	0.860959	1.16974	0.811221	0.963419	0.836366	0.812811	1.11878	0.930471	0.734175	0.955825	1.08764	0.809122	0.924185	1.08373	0.999906	1.07043	1.35651	1.05811	0.889543	0.915438	0.991166	0.891805	0.708353	0.925506	1.17132	1.38695	1.38565	0.935028	0.802831	0.733061	1.0223	1.09068	1.02968	0.924709	1.19887	1.0303	0.807683	0.572828	1.03014	0.932038	0.968131	0.906382	0.996668	1.0037
-62.4272	0.824955	1.16572	1.15846	0.900368	0.923517	0.948942	0.979245	0.801714	0.939661	1.08095	0.845685	1.1089	1.0778	0.756025	0.950821	0.956635	0.845372	0.947644	1.0399	1.01342	1.12423	1.31215	1.01792	0.931288	0.910858	0.958417	0.86546	0.944082	1.00729	1.12342	1.11659	1.4316	0.980047	1.10316	0.793584	1.03334	0.997944	0.974032	0.986292	0.965725	1.10877	0.726114	0.423271	1.03742	1.01653	0.948304	0.876895	0.913342	0.963793
-62.3301	0.882402	1.18784	1.12776	0.833652	0.975964	0.879614	0.794141	0.935274	1.12291	0.935179	0.893359	1.177	1.16663	0.841613	0.885722	1.06231	0.910795	1.02827	1.03094	1.05456	1.28928	1.13598	0.944615	0.947501	0.910752	0.905608	0.889926	0.863358	1.24455	1.13946	1.16056	1.21262	0.906054	0.900446	0.844884	1.19506	1.04675	1.06454	0.888053	1.15142	0.995284	0.894131	0.507812	1.0423	0.92243	0.990559	1.0776	0.956577	1.06069
-62.233	0.787448	1.17948	1.14675	0.917466	0.988987	1.01765	0.726888	0.886065	0.966055	0.981599	0.964477	1.00602	1.101	0.721816	0.958988	1.00048	0.983288	1.13747	1.03941	1.10951	1.50995	1.21857	1.01272	0.977942	0.898187	0.926493	0.924201	0.879734	1.15018	1.06919	1.03766	1.33848	1.00011	0.841701	0.931814	0.945086	0.878753	0.949769	0.874478	0.985392	0.966354	1.14625	0.570863	1.11392	0.873119	0.910044	0.860876	0.996007	0.930332
-62.1359	0.771873	1.16933	1.15487	0.922648	1.01092	0.840961	0.793857	1.12225	1.16078	1.01564	1.10063	1.01141	0.852816	0.806845	0.871901	0.786359	0.913699	1.12108	0.966424	1.0962	1.28691	1.23426	1.0216	0.972612	0.95849	0.999548	0.872025	0.816631	1.03823	1.24196	1.12484	1.04969	1.11604	0.949847	0.719018	1.03249	0.843737	1.01645	0.884874	1.20756	0.929635	0.764019	0.626846	0.897383	1.09458	1.05142	0.968381	0.967711	1.06346
-62.0388	0.915056	1.15558	1.14124	0.74128	0.918801	0.865423	1.02431	1.12644	0.992364	1.09082	0.737464	1.21698	0.965839	0.788292	0.908161	0.823898	0.845955	1.07481	0.895299	1.07974	1.11555	1.11613	0.912023	0.895741	1.16453	1.17694	0.907979	0.823513	1.08658	1.15692	1.04773	1.38338	0.929211	0.850252	1.09175	1.05025	1.1928	1.02043	1.1574	1.01233	0.940182	0.878274	0.598334	1.14351	0.8875	0.876238	0.850225	0.977873	1.04678
-61.9417	0.939735	1.27933	1.143	0.965818	0.939141	0.869495	0.67682	0.961145	1.01396	0.917328	0.80852	1.13269	0.984839	0.861919	0.930425	1.16091	0.916141	0.968798	0.827899	1.05697	1.04756	1.06268	0.954476	0.852133	1.03802	1.03083	0.874391	0.911401	0.983703	1.10458	1.18197	1.22513	0.944315	1.01345	1.01702	1.13298	1.0286	0.964557	0.971981	0.989061	1.05866	1.1425	0.556214	1.06498	1.0265	1.04598	0.820738	0.990847	0.870839
-61.8447	0.905162	1.47183	1.15246	0.978797	0.940468	0.875426	0.743275	1.05184	0.848947	0.770526	0.88778	1.09483	0.904091	0.870496	0.75565	0.929999	0.790467	0.886923	0.924013	1.0675	0.979853	1.04157	1.07295	0.825155	0.745228	0.722967	0.958372	0.872519	0.944979	1.1282	1.1966	1.29249	1.01373	0.890287	0.932647	1.17724	1.11555	1.09641	0.999561	1.13986	0.948752	1.21792	0.542194	1.04382	0.894337	0.877859	0.904585	0.933133	0.965921
-61.7476	0.777931	1.23647	0.935098	0.968035	1.04746	0.941176	0.779181	1.01898	0.965928	1.03307	1.05405	1.11294	0.992023	0.724861	0.786132	0.908537	0.746119	0.817114	1.10188	1.09469	0.912281	1.14667	1.19867	0.808523	0.775543	0.750949	0.922703	0.900084	0.948594	1.00052	1.20951	1.15239	0.928491	0.979603	0.869288	1.0728	0.844753	1.01517	1.16292	1.2436	0.980821	0.812819	0.588275	1.08763	1.04315	1.15966	1.00836	0.939439	1.01788
-61.6505	0.713145	1.11585	0.845032	0.91533	1.0025	1.04604	0.656186	0.920205	0.839255	1.01545	0.842865	1.18367	1.04527	1.02708	0.827699	0.761588	0.745293	1.08484	1.01055	0.931385	0.991638	1.18282	1.21594	0.818919	0.874857	0.86048	0.959667	0.832004	1.05039	1.0875	1.20181	0.91008	0.996318	0.895106	0.99728	0.948896	1.00844	0.921359	1.08596	1.16532	1.00993	0.694235	0.504832	1.05526	1.09857	0.949695	0.905814	0.870275	0.935016
-61.5534	0.77325	1.22471	1.00956	1.0263	0.96313	0.910284	0.661321	0.810319	0.925217	0.962957	1.11782	1.07665	1.12287	0.7547	0.849023	1.1957	0.884196	1.20487	1.00598	0.809444	0.984879	1.0811	1.01631	0.883373	1.11217	1.13311	0.886583	0.935538	0.994929	1.02713	1.24101	1.23754	1.05111	0.98945	0.961844	1.03992	1.11953	1.02481	1.06617	1.2543	1.04669	0.99828	0.558121	0.907161	1.21102	1.00287	0.731316	0.860466	0.793124
-61.4563	0.823747	1.2132	1.16637	0.998742	1.00022	0.909727	0.945143	1.01099	1.04049	0.957614	0.88349	1.20828	0.938752	0.701982	0.761517	0.79405	0.800897	1.02948	1.17493	0.770234	0.805891	1.03577	0.940916	0.944255	1.13358	1.13508	0.873247	0.854448	1.0026	1.12967	1.2529	1.10615	0.955917	0.879765	1.17823	1.3228	0.890737	1.10187	1.04942	1.19989	1.06789	0.758747	0.585611	0.941738	0.966212	0.997484	1.04452	0.946792	0.917121
-61.3592	0.869441	1.1415	1.31931	0.924032	1.00449	0.935727	0.763293	0.84383	0.992465	1.03791	0.843041	1.28567	0.886858	0.786555	0.90995	0.855975	0.853775	1.02356	1.14327	0.940915	0.881433	1.01864	0.927642	1.00335	1.04704	1.00171	0.879199	0.822525	0.97332	1.19863	0.993425	1.52085	0.959513	0.904758	0.75126	0.991476	1.00785	0.927957	0.902847	1.0469	1.00383	0.691397	0.618056	1.07701	0.999681	0.903967	0.965157	0.885719	0.956412
-61.2621	0.878269	1.49202	1.37885	0.962714	0.970225	0.854549	1.0534	0.858352	0.841143	0.91486	0.820062	1.26548	0.985824	0.801269	0.906883	0.936614	0.85091	1.10237	1.01131	1.21654	1.08424	1.02491	0.895096	0.897895	1.0412	1.021	0.842525	0.894366	0.923989	1.00541	1.02133	1.15258	1.00664	0.925279	0.813104	0.995177	1.09997	1.09325	0.97196	1.09897	0.96153	0.89132	0.583765	1.10298	0.841748	0.93994	0.947609	0.965852	1.09757
-61.165	0.916172	1.6021	1.37591	0.961605	0.921293	0.942073	0.729272	0.838818	0.92222	0.936438	0.95494	1.35628	0.933348	0.692638	1.10171	0.733931	0.969298	1.09058	1.00835	1.05493	0.860013	1.07969	0.876408	0.891459	1.03681	1.04687	0.848464	0.94928	0.937522	1.15818	1.43607	1.0852	0.942519	0.85418	0.947396	0.995991	1.166	1.05549	1.10956	1.04148	0.986645	0.643033	0.519161	0.963805	1.06988	0.938736	0.780496	0.93801	0.884411
-61.068	1.01222	1.23126	1.24799	0.752384	0.901628	0.952907	0.727514	0.931751	0.916991	0.973294	1.0032	1.42737	0.938827	0.90054	1.32287	0.914593	0.839003	1.06227	1.01412	0.953935	0.808211	1.23147	0.885436	1.08306	1.0353	1.08591	0.858234	0.992842	0.935371	1.09724	1.24898	1.10733	1.0433	0.876696	0.85462	1.11262	1.06478	0.871749	1.10606	0.954755	0.947466	1.00161	0.574607	0.924705	0.955203	1.10045	0.870287	0.985738	1.01852
-60.9709	1.0306	1.19506	1.08744	0.868313	1.04871	0.825857	0.704541	0.814489	1.11311	1.03907	0.850501	1.30976	1.11598	0.871775	1.35666	0.725875	0.899146	1.00091	1.03735	0.974165	1.10126	1.21586	0.973655	1.10429	0.902938	0.944114	0.896085	0.913811	0.924727	1.32198	1.31542	1.21051	1.06245	0.902223	0.906251	1.08474	0.981626	0.994324	0.975266	1.0753	1.12148	0.719264	0.509968	1.16988	1.20398	0.931386	0.864886	0.949476	0.930397
-60.8738	1.01013	1.32618	0.910588	1.04723	0.979374	0.898797	0.815199	0.971749	0.856701	0.900308	1.01248	1.29314	1.02075	0.684193	1.34426	0.724758	0.844039	1.06111	0.902827	1.06183	1.05649	1.11654	1.10147	1.04034	0.705143	0.711896	0.863399	0.968563	0.950916	0.991175	1.13007	1.19089	1.02907	0.873611	1.02956	1.01925	0.86968	0.936427	0.92753	0.981386	1.01541	0.806009	0.50876	0.929738	0.971612	0.786592	0.915608	0.907161	0.877005
-60.7767	0.986038	1.25355	1.07659	0.847728	0.975836	0.862866	0.901433	0.894091	1.01429	0.911128	0.954127	1.36402	0.976978	0.838185	1.27852	0.878112	0.844166	1.18209	0.689417	1.18322	0.842806	1.06473	1.06836	1.03166	0.816066	0.823152	0.875924	1.00519	0.861789	1.25152	1.06129	1.02055	0.962602	0.824925	1.04358	0.951105	1.11894	0.929387	0.88356	1.03311	1.01958	0.949336	0.536294	0.910489	0.997075	1.17956	0.915804	0.980011	1.08533
-60.6796	0.959731	1.32593	1.11839	0.902989	0.952291	0.83451	0.54539	1.02743	0.894501	1.11783	0.863008	1.40655	0.911249	0.766221	1.42328	0.977135	0.907238	1.04278	0.848253	1.0206	0.987218	1.0331	1.03375	1.05973	0.962963	0.959893	0.832804	0.894765	1.17337	0.929686	0.991042	1.14458	0.959705	0.920035	0.872807	0.940171	0.917489	0.865892	0.977613	1.12328	0.978098	0.717152	0.574528	0.925849	0.964486	0.928412	0.894199	0.888674	0.962977
-60.5825	0.928993	1.68835	0.9118	0.879023	0.986834	0.937812	0.991467	1.00787	0.932847	0.897027	0.888605	1.30997	1.0032	0.980391	1.43168	0.84232	0.888089	0.933467	0.952956	0.912162	1.05899	1.04185	0.996156	1.16129	1.1818	1.14761	0.966225	0.996386	1.13953	1.16334	1.30569	1.24263	1.02519	0.909779	0.871475	1.02519	0.716812	0.846017	0.948596	0.987665	1.01299	1.09177	0.515572	0.931707	0.933904	1.05503	0.93121	0.940292	0.872617
-60.4854	0.955386	1.70543	0.987825	0.966043	0.936606	1.00095	0.713009	1.04741	0.902516	0.927665	0.729863	1.28441	0.928054	0.691535	1.35956	0.898709	0.848233	0.884128	0.949393	0.912108	0.985494	1.15232	0.947935	1.19565	1.17947	1.15838	0.905938	0.826427	0.955251	1.1427	1.20479	1.38128	0.945918	0.929503	1.0627	1.08249	1.06534	1.0802	0.842271	1.08627	1.09187	0.864131	0.604591	0.900558	1.0323	1.08971	0.907541	0.924491	1.03626
-60.3883	1.01035	1.54983	1.20516	0.98025	0.901718	0.924458	1.22377	0.911307	1.05272	0.97497	1.02224	1.21624	0.995567	0.737413	1.38516	0.867881	0.830686	0.919109	0.897962	0.917375	0.881512	1.31365	0.894401	1.19641	1.06655	1.08069	0.940646	0.931503	1.14849	0.931929	0.998184	1.47275	0.949874	1.10352	0.981213	0.959165	0.881208	1.1348	0.881077	1.03669	0.947452	0.700159	0.564328	1.07274	1.16428	1.05137	0.863079	0.97419	1.01411
-60.2913	0.917116	1.47026	1.18538	0.694827	1.01427	0.982463	0.860496	0.94536	0.999035	0.988129	0.85424	1.27055	1.05202	1.00053	1.38098	0.933132	0.880754	0.996251	0.822598	0.925301	0.762288	1.26377	0.976036	1.07532	1.07257	1.14693	0.878216	1.0745	1.05969	1.05672	1.02604	1.01025	1.0031	0.997208	0.975632	1.03503	0.984249	1.15685	1.22637	1.19302	0.948268	0.874674	0.587707	1.04654	0.972182	1.06479	0.996917	1.04783	1.00969
-60.1942	0.862729	1.38524	1.16296	0.974969	0.94361	0.811003	0.670714	0.805356	1.01705	0.995606	1.02333	1.22293	1.05408	0.722566	1.22966	0.761626	0.878463	0.900691	0.816014	1.06427	0.726625	1.23286	0.978862	1.04734	1.03873	1.1275	0.899766	1.04748	0.950558	1.04687	0.97339	1.4424	0.955157	1.02257	0.919902	0.901091	0.975985	1.08614	0.996856	0.901942	0.941478	1.07036	0.548595	0.984371	1.00505	1.07511	0.882435	1.02782	0.991373
-60.0971	0.886029	1.28936	1.13527	0.844179	0.95718	0.791199	0.767596	1.04743	0.90819	0.905086	1.00504	1.25212	1.07529	1.18092	1.24607	0.930402	0.830344	0.786397	0.799667	1.09387	0.788047	1.23989	0.824074	1.20561	0.92515	0.936734	0.866132	1.04863	0.994091	1.15359	1.20629	1.37213	0.924454	0.985401	0.918835	1.04698	0.91262	0.889995	1.02424	1.04128	0.95268	0.925251	0.543086	1.01163	1.12147	1.00107	0.836942	0.992236	1.03031
-60	0.929951	1.56177	1.1897	0.871257	0.971198	0.838547	1.0015	0.898602	0.960666	1.01811	0.798308	1.20092	0.857093	0.908956	1.26514	0.90965	0.895545	0.634632	0.763794	0.904725	1.04364	1.3027	0.844019	1.16836	0.928439	0.919159	0.930217	1.11755	0.941435	1.05515	1.25084	1.34348	1.09352	0.958841	0.820733	1.2758	0.975454	1.07564	1.03713	0.933057	1.01545	0.854454	0.508383	1.21609	1.05164	1.01559	1.02791	0.987228	1.18959
-59.9029	0.984186	2.01832	1.2852	0.965225	0.853089	0.879439	0.739965	0.901575	1.0835	0.86928	0.981317	1.31799	0.859053	0.9635	1.19071	1.08527	0.89606	0.70055	0.732052	1.00663	1.03275	1.39341	0.951332	1.03335	0.990162	0.988179	0.932693	0.947431	0.819004	1.01379	1.07531	1.26675	0.968248	1.0072	0.88149	1.0066	0.955957	1.02058	0.98241	1.03949	0.904093	0.608716	0.572146	1.04694	1.17766	1.17559	1.00598	1.03322	1.10368
-59.8058	0.971825	1.73187	1.07923	0.903405	0.919553	0.907807	0.994288	0.732365	0.932419	1.0345	0.782581	1.29051	0.872176	0.839319	1.14061	0.792474	0.858208	0.875309	0.702374	1.25406	0.888625	1.33901	1.01753	1.19019	1.02379	0.975113	0.907333	0.98459	0.913287	1.20442	1.09177	1.23843	0.99859	0.878291	1.23916	0.866437	0.986923	1.00284	0.925102	1.04965	0.983144	0.898759	0.524919	0.906233	1.1466	0.908685	1.11936	1.11597	1.02291
-59.7087	0.969432	1.57913	0.970856	0.950679	0.819501	0.82166	0.609039	0.859056	1.03763	0.877722	0.87504	1.32139	1.01374	0.93197	1.3447	1.04744	0.789648	0.7892	0.641204	1.25758	0.919943	1.23734	1.05722	1.27236	1.09493	1.0265	0.918319	1.06371	0.840714	1.14059	1.17714	1.1813	1.0443	0.933039	0.930262	0.949893	0.992742	1.14377	0.999589	0.96083	0.935153	0.95613	0.525144	0.947752	1.06313	1.2136	0.94558	1.0937	1.13734
-59.6117	0.986975	1.69378	1.05767	0.693601	0.879162	0.903011	0.915036	0.8005	1.15839	0.935622	0.807925	1.28973	1.06208	0.669155	1.23146	0.815146	0.793496	0.755661	0.625803	1.21796	0.942727	1.04116	1.04391	1.20518	1.24108	1.20678	0.877261	1.04027	1.10674	0.937414	1.09759	1.01993	1.07532	0.92521	0.961034	1.25427	1.27761	1.31338	1.07265	1.11488	0.925285	1.10029	0.543908	1.14106	1.1483	1.12963	0.986346	0.996406	1.17945
-59.5146	1.01546	1.44749	1.24923	0.905132	0.983566	0.865623	0.987918	1.14571	0.858036	0.863957	0.76419	1.34938	0.920889	0.81039	1.09767	0.913652	0.86616	0.827263	0.701938	1.0921	0.948443	1.09634	0.992103	1.12675	1.25724	1.2764	0.89073	0.900162	1.00047	1.22213	1.08788	1.13395	1.15505	1.04564	1.01888	1.19564	1.11542	1.19671	1.11111	1.03459	1.04954	0.756242	0.605023	0.763777	1.12659	1.02877	1.02093	1.05328	1.02178
-59.4175	1.04941	1.02073	1.49318	0.85101	0.840993	0.753297	0.690812	0.785645	0.977064	0.842679	0.83318	1.22238	0.898778	1.08349	1.10326	0.959365	0.747863	0.879517	0.746095	1.09953	0.935342	1.2772	0.921053	1.04269	1.2084	1.29068	0.892821	0.864744	0.902984	1.28007	1.16678	1.10156	1.05115	0.961267	0.928872	0.962594	1.00307	1.15635	1.12964	1.15731	0.990468	0.875895	0.585181	1.08891	0.930577	1.06709	1.00109	0.913108	0.91162
-59.3204	1.02192	1.15568	1.13948	0.871517	0.966361	0.769927	0.719184	0.734622	1.05476	0.969106	0.990766	1.30202	0.917418	0.833108	1.02992	0.988866	0.761858	0.922099	0.774263	1.17362	0.912833	1.306	0.943441	0.999117	0.975774	0.948592	0.869518	0.962126	1.01516	1.22392	1.27048	0.853552	1.04893	1.06296	1.02457	0.69025	1.17698	0.968	1.16637	0.902639	0.885134	0.818486	0.52844	0.985616	1.10093	1.13686	1.04523	1.11617	0.999215
-59.2233	0.951789	1.26014	0.88306	1.1022	0.915841	0.759031	0.599726	0.937166	1.1086	1.0101	0.817565	1.35018	0.954919	0.948154	1.13473	0.912267	0.838159	1.06494	0.968468	1.10828	0.839758	1.33133	0.979814	1.02634	0.825741	0.750138	0.901963	0.98784	1.01133	1.15229	1.24082	1.04313	1.14526	0.905088	1.21135	1.26738	1.14075	1.07353	1.04645	0.922059	0.964939	0.855555	0.578397	1.05283	0.904906	1.02273	0.854525	1.01307	0.960562
-59.1262	0.796359	1.30357	0.821213	0.891706	1.02217	0.982248	0.916543	0.824496	1.03239	0.871885	0.819071	1.26035	1.02297	0.825398	1.01831	0.749047	0.786078	1.10625	1.05037	1.08373	0.793896	1.34971	1.04416	1.19518	0.840899	0.838948	0.900066	0.986656	0.946993	1.0201	1.18709	1.08466	1.10577	1.05421	1.02524	0.961058	1.07127	0.940475	1.01722	1.03627	1.08445	0.780096	0.5277	1.13897	1.16506	1.04869	0.883479	1.05144	1.05973
-59.0291	0.83135	1.27352	0.954606	1.00062	0.944838	1.01829	1.06936	0.821346	1.16061	1.03471	0.984557	1.15773	0.89023	0.708132	0.998756	0.915304	0.753751	0.944497	0.907663	1.14074	0.80246	1.31418	1.07837	1.30039	0.842755	0.877972	0.863101	0.806045	0.948567	0.949581	0.865785	1.24826	1.02382	0.94767	1.11434	1.0564	1.0057	1.15047	1.0842	1.25013	0.99991	0.80729	0.601934	1.14873	0.892796	1.13824	1.0671	0.879142	1.03885
-58.932	0.96155	1.20672	1.18562	0.827892	1.03973	0.831054	0.660146	0.97115	0.967958	0.926759	0.998218	1.16529	0.765624	0.788438	0.977059	0.903611	0.737004	0.907359	0.906228	1.14927	0.755527	1.25169	1.09753	1.3738	0.837962	0.892105	0.973852	0.946683	0.965185	1.09785	1.24535	1.18187	1.16322	0.822674	1.20307	0.739643	1.08526	0.931219	1.09719	1.05491	0.940491	0.702754	0.58824	1.03153	1.18032	0.907295	1.04137	1.02905	0.948554
-58.835	0.969544	1.359	1.05596	1.00097	0.916544	0.926313	0.823507	0.910551	1.14915	0.846591	1.10498	1.1742	0.974629	1.02127	0.931381	0.876978	0.793356	0.932529	0.97543	1.13354	0.680846	1.32523	0.903805	1.26078	0.739231	0.734556	0.901988	0.890237	0.952912	1.10668	1.08342	1.33379	1.05161	0.975952	0.949514	0.964314	1.02799	0.993263	1.08997	1.12316	0.99397	0.788565	0.620101	1.10851	1.09595	0.96235	1.04068	1.12257	1.06359
-58.7379	0.991225	1.42566	0.964921	0.859691	1.01887	0.845934	1.21803	0.903009	0.875979	0.927324	1.02741	1.10065	0.9721	1.05215	0.951191	1.07804	0.759941	0.860089	0.85139	0.953822	0.742572	1.39497	0.867846	1.17946	0.754862	0.737528	0.865674	0.913586	0.878333	1.05402	1.10651	1.14214	1.085	1.04791	1.28064	0.865381	1.1462	1.33421	1.12856	1.03965	0.957709	0.999399	0.490061	1.03383	1.07501	1.00372	1.13051	1.0068	0.782756
-58.6408	1.04028	1.32109	0.951104	0.796159	0.939069	0.917428	0.754254	1.07115	0.853597	1.06044	0.855275	1.26093	0.937606	0.882547	0.918791	0.982578	0.790767	0.804543	0.774952	0.938057	0.804664	1.45709	1.14742	1.16153	0.999216	1.06154	0.918246	0.941283	0.973352	1.10669	1.19835	1.12576	1.01999	0.848549	0.980344	0.842203	0.965877	0.96614	1.1055	1.13759	1.03457	0.801971	0.579698	1.15194	0.95372	0.84001	0.89814	0.973931	1.11558
-58.5437	1.03711	1.23666	1.06226	0.937056	0.944319	0.862147	1.09398	0.924119	1.1167	1.06003	0.983253	1.21349	0.933961	0.872555	0.917217	0.968769	0.830144	0.782785	0.793717	1.2502	0.867487	1.43296	1.10679	1.22673	1.16653	1.22399	0.857611	0.897354	1.15813	1.10535	1.23304	1.10983	1.03713	0.984822	1.0438	0.725933	1.11641	1.192	0.918652	1.10672	1.02264	0.893639	0.532959	1.19783	0.906018	0.906818	1.14487	1.05682	1.10544
-58.4466	1.00784	1.16229	1.2359	0.944625	1.01841	0.964368	0.750341	0.773549	1.0684	1.20256	1.08153	1.28772	0.929851	0.756496	0.975747	0.855533	0.78611	0.818462	0.844931	1.23067	0.952189	1.3657	0.906048	1.3335	1.29533	1.30566	0.994745	0.884548	1.18495	1.28265	1.47266	0.93047	1.05936	0.920413	0.959702	1.01977	1.28649	1.03185	1.0623	1.13964	0.974683	0.708896	0.461439	1.14334	1.05315	0.959212	1.04159	1.16294	1.01468
-58.3495	0.934057	1.15249	1.18595	0.921622	1.06507	0.917227	0.9464	0.920344	1.05236	0.915898	1.13715	1.19569	1.01748	0.854399	0.829133	0.765511	0.715836	0.882855	0.912367	1.0453	1.04783	1.3651	1.08758	1.30456	1.47642	1.41725	0.988912	0.926904	1.18575	1.22541	1.09306	1.00386	1.01652	0.810782	1.04782	0.893628	1.02369	1.01043	1.08062	1.14617	0.919556	1.03104	0.61156	1.19873	1.41934	1.09709	1.00638	1.07259	1.03988
-58.2524	0.860573	1.20826	1.16876	0.973466	1.02367	0.855288	0.689089	0.718925	1.06497	0.818922	1.0918	1.17612	1.06529	0.857739	0.854374	0.802705	0.815253	0.801069	1.12386	1.04051	0.827875	1.37936	1.189	1.29075	1.51643	1.42578	0.908922	0.961814	1.07496	1.03733	1.33118	1.6481	1.12525	0.901473	0.921451	0.929071	0.870936	1.09732	1.0653	1.132	1.0518	0.879334	0.508494	1.1985	1.10322	1.09074	0.996023	1.10808	0.933248
-58.1553	0.787682	1.39518	1.21708	0.98131	0.978109	0.984614	0.913964	0.76058	1.0228	1.03874	0.87335	1.5406	0.999226	1.08867	0.859954	0.929826	0.812058	0.811906	1.14443	1.09166	0.795459	1.42334	1.13017	1.30722	1.27428	1.22819	0.990213	0.881251	1.07761	1.3148	1.01354	1.27181	1.11849	0.901868	1.11638	1.02534	0.948434	1.13744	1.05286	1.14205	1.14633	1.08367	0.449619	1.07948	1.15931	0.916366	1.05099	1.1678	1.06271
-58.0583	0.892342	1.28369	1.20175	0.643717	0.955614	1.0577	0.64984	0.768753	0.918386	0.809616	1.01686	1.5749	0.851112	1.03755	0.82933	0.809107	0.818329	1.00799	0.783161	1.25468	1.13812	1.39392	1.21152	1.21433	1.08896	1.07506	0.979826	0.962222	1.22653	1.17912	1.1592	1.02813	1.00359	1.00254	1.00728	0.953722	0.936451	1.1286	0.959319	1.04587	1.1803	0.778698	0.581908	0.918379	1.29813	0.849159	1.11878	1.0997	1.17745
-57.9612	1.08578	1.023	1.1546	0.962828	1.01328	0.864077	0.991993	0.890431	0.959465	0.840722	1.19867	1.49449	0.836218	0.878676	0.876255	0.998156	0.825881	1.09335	0.686868	1.1442	1.06397	1.32779	1.36297	1.06676	0.932049	0.944158	0.961394	0.817847	0.97521	1.33902	1.24673	1.32309	1.04955	1.03485	0.901957	0.699262	0.97123	1.19033	1.02003	1.20556	1.05686	1.00941	0.57172	1.00405	1.00596	0.959278	1.06016	1.15446	1.11135
-57.8641	1.09182	1.29592	1.07258	1.11403	1.09278	0.951194	0.769456	1.03359	0.985591	1.13688	1.03509	1.62914	0.699988	0.997856	0.821022	1.03596	0.825881	1.12334	0.723063	0.896955	0.781401	1.21917	1.18467	1.00579	0.897827	0.932625	0.930841	0.960662	1.16436	1.26044	1.17222	1.24712	1.06131	0.886842	1.34806	0.653119	1.1725	1.21511	1.02982	1.19422	1.02961	0.812926	0.545715	0.917438	0.994407	0.836858	0.923523	1.13569	1.30289
-57.767	1.07723	1.40879	1.06587	0.998092	0.979502	1.02695	0.872216	0.991909	1.25801	1.16521	1.23619	1.52471	0.886513	1.05584	0.782822	0.822302	0.839871	0.926992	0.75262	1.01073	0.819885	1.17092	1.07773	0.938788	0.838739	0.890899	0.928602	0.962964	1.15786	1.2116	1.31466	1.23288	1.09382	0.878397	1.43819	0.618707	1.06109	1.11894	1.07803	1.35181	1.01714	0.654886	0.544677	1.07213	0.997758	0.88862	1.09749	1.10506	1.03795
-57.6699	1.02137	1.20155	1.2098	0.899945	1.00586	0.919152	0.922626	0.847805	0.91194	0.983108	0.939037	1.60959	1.1138	0.744003	0.801005	0.972671	0.726667	0.854762	0.784419	1.03234	0.942052	1.24344	1.11355	0.859735	0.729919	0.788786	0.945134	1.03403	1.14053	1.36218	1.09592	1.37077	1.04215	0.896319	1.26227	0.761978	1.00253	1.0387	1.04549	1.08841	1.01101	0.842994	0.549969	0.954641	1.0165	1.01364	1.21211	1.10469	1.00727
-57.5728	0.996538	1.2151	1.22525	0.883314	0.996722	0.939255	1.07444	1.04349	1.02208	1.08199	1.04382	1.47363	1.03052	1.06698	0.715865	0.714875	0.908038	1.03077	0.820704	0.869634	1.23159	1.2203	1.22306	0.898182	0.760392	0.773537	0.939367	1.01662	1.10596	1.26487	1.38674	1.30795	1.08292	1.02471	1.0322	0.853774	0.935985	1.23997	1.08599	1.01516	1.0006	0.928335	0.584584	0.973572	1.13398	1.07186	1.11142	1.05217	0.861599
-57.4757	0.987218	1.33904	1.17646	0.912363	1.04098	0.935698	1.19546	1.17262	0.873487	1.11589	0.859584	1.51363	0.981161	0.784966	0.766097	0.951326	0.721158	1.05883	0.762573	1.0029	1.21256	1.14934	1.36943	0.995379	0.860512	0.80172	0.94625	0.786373	1.05365	1.19162	1.35472	1.32545	1.18806	0.944612	1.44297	0.839764	1.0992	1.36829	1.09989	1.02186	1.02679	0.819016	0.574464	1.15134	0.944947	0.850021	1.19842	0.967839	1.06401
-57.3786	0.89057	1.36147	1.2875	0.894026	1.05431	0.949021	0.888765	0.946368	1.09538	1.00301	0.785663	1.25743	1.09174	0.835169	0.777437	0.93396	0.661487	1.01291	0.657233	1.28415	1.03927	1.19681	1.15896	0.979632	0.926311	0.925091	0.824532	0.879232	1.02389	1.16079	1.16862	1.03451	1.25537	0.914171	1.57586	0.853526	1.00784	1.16065	1.15559	0.907562	0.990997	0.767917	0.570044	1.04504	1.07864	0.794259	0.871077	0.958962	1.0438
-57.2816	0.869297	1.36551	1.30458	0.941308	0.969169	0.908263	0.766433	1.02561	0.865859	1.00821	1.2212	1.27955	1.05106	0.822426	0.674597	0.766548	0.887615	1.01506	0.924155	1.16918	1.20207	1.24856	1.0372	0.975666	0.999261	1.01224	0.85832	1.01459	1.08717	1.16532	1.1359	1.17169	1.03554	1.02199	1.25914	0.778934	1.21596	1.01018	1.0617	1.13228	1.00045	0.82829	0.583278	1.08025	1.05558	1.20994	1.00394	1.07006	1.06336
-57.1845	0.998773	1.33276	1.13372	0.886769	0.987667	1.05381	0.934952	0.955886	1.01396	0.868001	0.804955	1.48051	0.910579	0.873527	0.761607	1.09266	0.995492	1.00447	1.04379	1.12558	1.19239	1.30887	1.09285	0.995259	1.08651	1.02694	0.855864	0.999038	0.876576	1.40182	1.14044	0.951993	1.10748	1.08297	1.27264	0.868245	1.16667	1.24596	0.93036	1.08223	0.980144	0.712495	0.557559	0.93638	0.982796	0.925061	1.06757	1.07934	1.07717
-57.0874	0.956565	1.28918	1.00422	0.847197	0.999956	0.863917	1.01408	0.980001	1.1352	1.14128	1.1026	1.46712	1.03169	1.03421	0.76142	0.903342	0.892856	0.968359	0.868833	1.22472	0.837751	1.18473	1.16889	1.01287	1.10019	1.04819	0.870758	0.949962	1.06953	1.402	1.17772	1.00821	1.12408	0.888921	1.14755	0.89335	0.964763	1.07333	1.03378	1.03762	1.0313	1.08818	0.539021	1.14362	1.10224	0.936184	1.01535	1.10457	1.24542
-56.9903	0.828515	1.24017	0.895405	0.948833	1.11187	1.11974	0.838959	1.02256	0.968068	1.11048	0.955169	1.50061	1.063	0.725626	0.662178	0.91742	0.901644	1.0387	0.787199	1.27595	0.973896	0.968372	1.25511	1.02949	1.07707	1.07273	0.937442	0.86637	1.13112	1.53574	1.09734	1.22227	1.24288	1.06767	1.28173	1.11671	1.12014	1.48874	0.872944	0.935422	0.931375	0.915086	0.536484	1.10801	1.23868	0.881333	1.03527	1.05418	1.21738
-56.8932	0.810118	1.16385	0.906534	0.972094	0.971087	0.875779	1.18423	0.873146	1.20732	1.15272	0.69345	1.47442	0.99077	0.961983	0.614063	0.856264	0.777123	1.16226	0.752225	1.30323	1.35543	1.17978	0.991393	1.19788	1.23761	1.24902	0.889603	1.01404	1.19329	1.25584	1.35319	1.40172	1.19835	1.02262	1.30743	1.00102	0.850527	1.08663	0.933572	1.14037	0.994993	0.706847	0.518071	1.08424	0.939188	1.00086	1.1244	1.00251	1.11977
-56.7961	0.827885	1.11868	1.03675	0.798193	0.978303	0.982524	0.806365	1.02325	1.09898	0.884707	1.07532	1.39041	0.931617	0.862697	0.65811	0.91215	0.959012	1.03013	0.741699	1.01325	1.24796	1.30118	0.86259	1.24151	1.2242	1.24528	0.943499	1.03529	0.971864	1.27344	1.2137	1.22529	1.05202	0.965385	1.31205	1.06979	1.01543	1.24635	1.07965	1.10417	1.05769	0.920163	0.528129	1.16715	0.928862	0.746117	1.23426	1.05466	1.09955
-56.699	0.917979	1.13579	1.40516	0.967402	1.03733	0.967063	0.726499	0.965725	1.19464	0.883345	1.1348	1.31169	0.904854	0.989822	0.696861	0.865054	0.792498	1.00354	0.759281	0.875378	1.21375	1.24253	1.00363	1.03561	0.862895	0.881487	0.938715	1.04783	1.20713	1.34095	1.21581	0.940218	1.17346	1.08485	0.965422	0.775956	1.31385	1.23957	1.03432	1.09619	0.988472	0.757887	0.543136	1.02867	1.1365	0.993688	0.912419	0.935939	0.886644
-56.6019	0.954595	1.18069	1.29565	0.796225	1.03929	0.979014	1.02454	1.05804	1.03588	0.989437	1.11111	1.40178	0.974169	1.07975	0.709946	0.75074	0.703089	1.18802	0.83308	1.04173	1.32605	1.14659	1.13303	0.953448	0.919044	0.932948	0.995648	1.02373	1.05128	1.09964	1.08358	1.05311	1.14502	0.897907	1.24678	0.929522	0.951146	1.14018	1.01765	1.01426	1.07256	0.868643	0.471527	0.962357	1.09193	1.16483	1.22919	0.960449	1.13951
-56.5049	0.964471	1.23948	0.947174	0.692101	0.95028	0.938483	1.17315	0.899526	1.03117	0.956187	0.935762	1.37205	1.00644	0.846748	0.65768	0.949613	0.750428	1.1452	0.8302	1.07899	0.987879	1.03201	1.25661	0.933149	1.18392	1.19204	1.04823	0.959246	1.31722	1.43164	1.41953	1.242	1.08103	1.12657	0.963767	0.919469	0.953608	0.895885	0.9013	1.10404	1.03792	0.925023	0.437479	1.12034	1.03336	0.958563	1.14779	0.973258	1.14172
-56.4078	0.902542	1.23306	1.04179	0.824412	1.02289	0.922149	0.84057	0.882142	1.03975	1.05271	1.10703	1.32715	1.09709	0.881546	0.671027	0.780068	0.763283	0.988722	0.78898	1.0517	0.424475	1.08764	1.11532	0.825422	1.13789	1.12187	1.00907	1.02965	1.07091	1.40254	1.32963	1.22226	1.23924	1.01525	1.18742	0.94762	0.92292	1.14538	1.08572	1.05923	1.037	0.866268	0.499207	1.14685	1.13593	1.07186	1.13126	1.10133	0.990399
-56.3107	0.887151	1.21262	1.08993	1.01618	1.04036	0.978145	1.24019	1.01072	1.02604	1.01578	1.03027	1.28687	0.893728	0.92139	0.662331	0.896575	0.805283	1.05721	0.867901	1.00438	0.977665	1.11433	1.02236	0.760934	1.05459	1.02497	0.953043	1.02327	1.06411	1.06478	1.16154	1.14208	1.2177	0.921554	1.09376	0.855546	0.901967	1.17753	1.12662	1.19408	1.0551	0.735249	0.602425	1.04946	1.14857	1.07264	1.32858	1.07128	1.15439
-56.2136	0.964834	1.16414	1.04513	0.777793	1.01461	1.02502	0.889815	1.0704	1.15494	0.96619	1.13026	1.27143	0.83502	1.27036	0.633243	0.90642	0.965764	1.08251	0.929206	0.974469	1.35035	1.08316	1.02607	0.782925	0.896759	0.874571	1.0108	1.04874	1.08819	1.41342	1.25282	1.10061	1.12817	1.05312	1.03911	1.09649	1.06276	1.2251	0.935756	0.910205	1.12265	0.702198	0.459356	1.0648	0.996945	0.948945	0.853052	1.04949	1.04265
-56.1165	0.904509	0.990968	1.11477	0.853681	1.01832	1.04026	0.73999	0.965059	1.11206	1.05258	1.01379	1.40594	0.925866	0.964265	0.641373	1.05904	0.934277	1.02144	0.955281	0.979389	1.36205	1.19077	1.00689	0.8563	0.900763	0.864815	1.04031	0.982273	0.885971	1.28627	1.17363	1.01357	1.08178	1.04571	1.20444	0.870754	0.994957	1.10741	0.970159	1.11545	1.03788	0.660401	0.587963	0.993881	1.19342	0.985381	0.853539	0.9727	1.13061
-56.0194	0.775178	0.755453	1.24163	0.813843	1.04343	1.02383	1.07997	0.922245	1.04511	0.975516	1.0458	1.22934	1.03328	1.08749	0.599786	0.855361	0.847974	1.02792	0.870289	0.99268	1.29789	1.36778	0.976275	0.955367	0.985682	0.925378	1.05169	1.1682	1.00935	1.22504	1.14567	1.06674	1.04912	1.0394	0.908798	0.974691	0.946456	0.988776	1.07228	0.976838	0.971944	0.904238	0.519253	1.12789	0.958667	0.966614	0.935531	1.06886	1.09745
-55.9223	0.824919	0.833159	1.18982	0.864832	1.0148	0.860066	1.10248	1.14509	1.12125	1.17653	1.16526	1.24682	0.992759	1.14651	0.657298	0.947538	0.9987	1.06817	0.729764	1.01016	1.19581	1.24074	0.970289	0.848627	0.84425	0.816385	0.979962	1.02324	0.947857	1.01352	1.2877	1.26684	1.25568	1.11863	1.23074	0.946228	1.11391	0.950678	1.14867	1.06461	1.0906	0.865128	0.540456	1.14615	0.944529	0.997374	0.800778	0.953531	0.891511
-55.8252	0.841552	0.923272	1.20691	0.990399	1.00686	1.11155	1.05908	1.11238	1.20636	0.943197	1.2381	1.36842	1.05364	0.784995	0.673405	1.03296	0.77517	1.09946	0.814593	1.04706	1.29071	1.15727	1.00058	0.834088	0.755561	0.75604	0.984036	1.07141	1.02676	1.13357	1.21008	1.12886	1.18255	1.06998	1.20489	0.74336	0.891392	1.22815	1.10752	1.13032	0.963843	0.784045	0.532157	1.2158	1.15827	0.939742	0.903739	1.00389	0.955895
-55.7282	0.791969	1.0382	1.36182	0.797909	1.09068	1.08016	0.877329	0.972349	1.10434	1.14523	1.29168	1.19738	1.00495	0.85381	0.718661	1.16924	0.76022	1.08283	0.870195	0.999472	1.34407	1.16091	1.10343	1.00395	0.772361	0.792992	0.974799	1.0119	1.06846	1.34369	1.08085	1.35657	1.27115	1.06022	1.31614	0.891272	1.22759	1.22863	1.10509	1.05322	0.985057	0.93056	0.662407	1.24314	1.0706	0.966367	0.846016	1.0455	1.09089
-55.6311	0.774472	0.935141	1.25007	0.991578	1.04733	1.05702	1.25482	0.975359	1.32985	1.10701	0.865714	1.35397	0.913766	0.948771	0.713557	1.00277	0.930606	0.970373	0.867342	0.782913	1.31436	1.24419	1.12267	0.989808	0.789151	0.752044	0.886613	1.06372	1.21736	1.3021	1.12067	1.22704	1.21602	1.08568	1.28152	1.15966	0.999106	1.03442	1.03896	0.967783	1.04252	1.0511	0.551753	0.955386	1.01345	0.826821	1.10121	0.972295	1.04522
-55.534	0.773019	0.723086	1.00499	0.96785	1.02994	1.18692	1.11128	0.957966	1.10481	0.874879	1.05254	1.32415	1.02236	1.0543	0.820984	0.877861	0.950344	0.912315	0.827809	0.68221	1.24333	1.36728	1.1001	0.883659	0.805936	0.672146	0.865632	1.09236	0.9396	1.22908	1.12832	1.11417	1.17497	1.13889	1.24842	0.758493	1.12892	1.23885	1.19196	1.1157	1.01739	0.807501	0.653276	1.22595	1.06278	0.888298	1.26995	1.05201	1.05033
-55.4369	0.780371	0.816305	0.991691	0.996218	1.07386	1.03986	1.03399	1.1293	1.14418	1.17481	0.961736	1.20264	1.11333	0.568456	1.12782	0.884014	0.908559	0.881456	0.769938	0.639434	1.15163	1.12036	1.0854	0.957473	0.738853	0.700284	0.856526	0.979268	0.96962	1.29327	1.13442	0.890644	1.2492	1.11593	1.089	1.00434	0.96193	1.02261	1.02196	1.14147	0.954429	0.849669	0.619104	1.0702	1.3007	0.994783	1.18132	0.974412	0.91799
-55.3398	0.784945	0.921137	1.01227	0.939622	1.05222	0.923513	1.04696	1.12355	1.1498	0.962297	0.988979	1.26489	1.06666	0.711339	1.29795	0.867092	0.980829	0.981058	0.944753	1.00056	1.19469	0.95598	1.07004	1.01605	0.764883	0.792489	0.887987	1.04098	1.19974	1.27605	1.35877	1.07289	1.23271	1.12201	1.16355	0.890211	1.12183	0.942101	1.17966	0.883496	1.01514	1.10808	0.634151	1.21763	1.19207	1.03944	1.01684	0.992766	0.86647
-55.2427	0.783965	1.0492	1.10059	0.875614	1.03546	0.910574	1.16498	1.05414	0.887536	1.08252	0.884112	1.30394	1.09518	1.06486	1.29283	1.05342	0.869127	0.98994	1.07604	1.15507	1.20235	0.956701	1.05335	1.04415	0.977137	1.01283	0.88155	1.17369	0.902055	1.02383	1.15304	1.23882	1.11261	0.979555	0.881211	0.825356	1.23581	1.0387	0.910111	0.957082	1.02247	0.872625	0.639451	1.38585	1.07684	0.920814	0.956407	1.07865	1.01284
-55.1456	0.767525	1.0163	1.01125	0.906825	1.05073	1.09363	1.15039	1.10793	1.04806	1.00499	0.918476	1.3007	1.09676	0.893743	1.23832	1.10272	0.93074	0.817383	1.12029	0.896307	1.13925	0.96125	1.01633	1.01209	0.907513	0.899601	0.84781	1.05241	1.17225	1.14077	1.26205	1.55602	1.11712	0.953201	0.973096	0.754783	1.1628	1.15579	0.949645	1.16735	0.960083	0.807557	0.698014	1.17508	1.33008	0.821502	1.09582	1.03838	1.04122
-55.0485	0.743355	0.902928	0.833077	1.04396	1.11194	1.01256	0.875549	0.92305	1.24274	0.943508	0.881195	1.30691	1.06634	0.672966	1.26081	0.921191	0.873103	0.836159	1.02327	0.916235	1.02201	0.967715	0.969135	0.949944	0.696949	0.619594	0.817391	0.989782	0.995789	1.18193	1.04961	1.37849	1.06193	0.992407	0.986213	0.803554	1.00022	1.27224	1.10757	1.05177	1.04901	1.08776	0.573606	1.04597	1.18717	1.00738	1.31051	1.01447	0.912483
-54.9515	0.849083	0.904693	0.872053	1.05252	1.05399	0.91661	1.14099	1.09108	0.929733	0.95138	0.870618	1.15919	1.20409	0.786555	1.35627	0.942998	0.747095	0.950601	0.855628	1.07551	0.877701	1.20677	1.08595	1.00758	0.577649	0.557087	0.919319	1.06594	1.07076	1.19101	1.26531	1.06519	1.12371	0.941527	1.21549	0.721482	1.1437	0.956694	1.15203	0.955503	1.01127	0.644289	0.542382	1.2159	1.07802	0.969513	0.863971	0.996336	1.03467
-54.8544	0.938311	0.87845	0.901368	0.90168	1.05214	1.0097	0.911202	1.17572	1.00807	1.02783	1.04148	1.14075	1.18223	0.815335	1.34541	1.05062	1.11723	0.926164	1.03128	1.16941	0.866659	1.3665	1.10435	1.10337	0.57168	0.591809	0.826128	1.02423	1.32334	1.01097	1.10652	0.992595	1.12408	0.942114	0.929359	0.972876	1.20005	1.04588	1.16199	1.06682	1.15893	0.918152	0.669184	1.29242	1.11141	0.984464	1.08815	0.9245	1.02787
-54.7573	0.994542	0.796187	0.911362	0.983039	1.0319	1.0351	0.81698	1.11571	0.950922	0.912682	1.27237	1.27388	0.913518	0.869701	1.32633	0.993116	0.917583	0.929442	1.11927	1.2099	0.809776	1.36758	0.925928	1.2755	0.79237	0.820988	0.875264	0.95892	0.983356	1.50891	1.19944	1.69229	1.11608	1.01677	1.14595	0.753913	0.991144	1.09421	1.07783	0.921107	1.09928	1.02965	0.60869	1.15608	1.03695	0.985519	1.16947	0.985348	0.919323
-54.6602	0.949993	0.889475	0.917435	1.02394	1.08009	0.898707	0.891424	1.20933	0.936958	0.980759	0.938723	1.11081	1.07187	0.773299	1.22782	0.781243	0.831622	0.988149	1.03196	1.14353	0.661208	1.33117	0.928588	1.26715	0.92488	0.928798	0.872959	1.08079	0.849501	1.22744	1.29415	1.36805	1.05802	1.03088	1.0183	0.772824	1.12023	1.04465	0.923086	1.05236	0.964077	0.931562	0.523893	1.16435	1.12585	0.875638	1.32744	0.907755	0.940858
-54.5631	0.855055	1.07054	0.921548	0.928419	0.989307	0.968006	1.04738	1.01485	1.19599	1.03172	1.20045	1.13419	1.13752	0.8579	1.33447	1.24753	0.775836	0.964285	0.876935	1.29806	0.616078	1.27602	1.02179	1.16857	1.0133	0.975923	0.89474	1.21389	0.929345	0.980358	1.09988	1.23357	1.05049	1.3078	1.17291	0.793292	1.22182	1.01915	0.982895	0.99277	1.03842	1.09418	0.485107	1.05932	1.26923	0.772464	0.866359	0.971473	1.07565
-54.466	0.977199	0.888536	0.847114	0.913389	1.00415	0.960592	1.09958	1.13232	1.2186	1.07662	1.08161	0.979027	1.04899	0.902307	1.25767	0.970479	0.974858	0.899135	0.688052	1.56304	0.622667	1.2243	0.982258	1.00619	0.82884	0.765457	0.8701	1.00316	1.03121	1.19045	1.22343	1.20665	1.03256	1.02014	1.12112	0.69474	1.09901	1.05545	0.949468	1.04505	1.02248	0.941541	0.526283	1.20007	1.23602	0.839912	0.952386	1.00254	1.04598
-54.3689	1.0846	0.752368	0.829246	0.96587	0.990147	0.942369	0.963278	0.814744	1.17589	1.03031	1.03005	1.09709	1.32632	0.741414	1.31241	1.09643	0.915364	0.879189	0.688702	1.04175	0.765355	1.19462	0.944986	0.949972	0.800698	0.743101	0.881739	0.842965	1.13812	1.09687	1.06188	1.23493	1.08443	1.04649	1.08121	0.681487	1.00432	0.964784	1.00028	0.990069	1.00282	1.0222	0.524672	1.12974	0.961775	0.953227	1.08337	1.01671	1.15415
-54.2718	1.1625	0.707869	0.924513	1.01917	0.971524	1.00918	0.847679	1.08966	1.0475	1.03063	1.16023	1.23827	1.02275	0.6373	1.37465	0.867977	1.24545	0.831142	0.715426	0.771792	0.801876	1.20903	0.91223	1.10609	1.0852	1.09696	0.839452	1.01765	1.14755	1.0093	1.06821	1.33852	1.16541	0.9967	1.01116	0.79215	1.07487	1.04289	0.972315	0.917911	0.989368	0.97526	0.579888	1.23947	1.15827	0.867138	0.937362	0.962407	0.93587
-54.1748	1.08011	0.817658	1.04078	0.852795	1.10925	1.10447	0.974737	0.987896	1.20563	0.947204	1.25088	1.19306	1.13458	0.736955	1.34816	1.14555	1.17973	0.726895	0.7943	1.00451	0.626064	1.09594	0.900405	1.01725	1.11402	1.16024	0.881812	1.03322	1.10341	1.22471	1.03938	1.41227	1.18968	0.983397	1.17841	0.822181	0.947636	1.10511	0.964333	1.02249	0.962196	0.737798	0.577706	1.14603	1.16363	0.851009	1.13294	1.11621	1.00555
-54.0777	0.917579	1.00459	1.16755	0.838708	1.11337	1.10204	0.971257	1.28999	0.823443	0.969323	1.12005	1.2021	1.02123	1.0356	1.25891	1.20207	1.21792	0.706239	0.868843	1.00564	0.647187	0.919111	0.899045	0.80593	1.015	1.07823	0.793911	0.990969	1.11073	1.1355	1.35028	1.02755	1.1172	1.00653	1.00246	0.730144	0.962671	1.3183	0.951879	0.964611	0.925112	0.750308	0.528694	1.19667	0.936974	0.743976	1.04401	0.93189	0.943471
-53.9806	1.01922	0.945868	0.903594	1.00129	1.00603	1.09305	1.20793	1.09362	0.890222	1.17448	1.11459	1.18886	0.988632	0.925554	1.45284	1.34238	1.00302	0.727378	0.941222	0.890973	0.766777	1.1298	1.02904	0.957271	1.25677	1.20935	0.838352	0.976898	1.23465	1.18135	1.19587	0.963957	1.01791	1.01077	0.887578	0.786059	1.16358	1.18888	1.07647	1.12277	0.970961	0.934343	0.533961	1.0715	1.17168	0.825669	0.861374	0.913248	0.955886
-53.8835	1.15814	0.909982	0.800344	0.915133	1.04346	1.05966	0.879407	1.12173	1.00614	1.13706	0.912564	1.16452	1.02784	1.07728	1.2835	0.986635	1.10223	0.769715	0.984741	1.04529	0.863822	1.28093	1.10728	1.09276	1.38118	1.28597	0.815439	0.948138	1.39146	1.16525	1.35322	1.06042	1.11256	1.05057	1.13205	1.03531	1.03267	1.11618	1.0167	1.11562	0.93045	0.953924	0.605454	1.42481	0.997107	0.914154	0.905605	1.01243	1.02063
-53.7864	1.37166	0.919772	1.0185	0.973686	1.08915	1.15839	1.28682	1.18456	0.840387	1.1682	1.12824	1.28804	1.31297	0.876029	1.38032	1.07471	1.14385	0.816949	0.998937	1.15147	0.895636	1.31292	1.08201	1.19653	1.27086	1.25362	0.824286	0.978544	1.27822	1.39044	1.34955	1.14713	1.03804	0.924037	1.19644	1.16055	1.06379	1.24202	0.97191	1.02608	0.975373	0.90249	0.669077	1.02478	1.07569	0.998676	0.910403	1.00223	0.998863
-53.6893	1.43275	0.866383	0.996673	0.939042	1.0528	1.07255	1.27909	1.26216	1.04828	1.01462	1.1598	1.19438	1.11096	0.848499	1.24987	1.25863	1.21219	0.873979	0.954488	1.16139	0.796983	1.32663	1.16312	1.12584	1.21605	1.24685	0.804946	0.980681	1.39746	1.13924	1.24215	1.26523	1.05606	1.04226	1.19668	0.856974	1.00553	1.12057	1.13711	1.07049	0.93242	0.986364	0.594736	1.12359	1.09622	0.905243	1.19628	0.999699	0.980921
-53.5922	1.41763	0.781404	0.854856	0.81409	1.11262	1.06424	0.891367	1.00757	0.97506	0.911669	0.93001	1.16546	1.1252	1.22619	1.31654	1.36896	1.24089	0.882905	0.929835	1.04469	0.695607	1.33119	1.29741	0.967907	1.18898	1.25286	0.840341	1.04548	1.33881	1.2946	1.20801	1.27068	1.02084	0.968818	1.23745	0.851505	0.979428	1.12585	1.1305	0.985481	0.94546	1.23392	0.558669	0.975745	1.12396	1.16825	0.896403	0.977522	0.885586
-53.4951	1.34089	0.858052	0.747097	0.979849	1.01791	1.02408	0.887293	1.10028	0.914636	1.14416	1.14382	1.2608	1.04067	0.937559	1.24034	1.22659	1.31557	0.86778	0.915081	0.864669	0.59287	1.35008	1.04494	1.04768	1.16876	1.19325	0.841686	0.961597	1.20864	1.05255	1.31481	1.17921	1.14938	0.909179	0.921499	0.897979	0.803061	1.09263	0.961173	1.09858	1.00232	1.12304	0.544344	0.991759	0.936928	1.14698	1.12833	0.948057	1.03835
-53.3981	1.2687	0.916919	0.711133	0.861797	1.09898	1.13492	1.01577	1.05652	1.15324	1.00104	1.01973	1.09202	1.21902	0.979229	1.20461	1.00336	1.29013	0.819066	0.67826	1.05717	0.841082	1.32295	0.87859	1.07283	1.04908	1.05123	0.773341	0.88977	1.17071	1.19784	1.20548	1.31913	1.10291	1.00516	1.12384	0.833954	0.938134	1.06857	1.13797	0.983687	0.916486	0.953115	0.518491	0.93683	1.24194	0.885724	0.993265	0.998633	1.17188
-53.301	1.20561	0.940225	0.818756	0.843105	1.09338	1.04225	1.0772	1.1233	1.16934	1.10546	1.06258	1.04526	1.14362	1.04928	1.10345	1.02791	1.09505	0.804828	0.572618	1.15423	0.982006	1.20378	0.884456	0.988764	0.730476	0.744383	0.783203	0.956201	0.868792	1.15249	1.18997	1.17941	0.988205	0.988113	1.11416	1.15302	0.851953	1.03923	0.963781	0.829145	0.909688	0.74695	0.463249	1.00656	1.10113	1.03299	1.04886	0.908346	1.00744
-53.2039	1.21779	0.911977	0.791593	0.740655	1.13256	1.04092	0.878528	1.08578	1.09704	1.06195	1.07626	1.10312	1.02838	0.872305	1.27019	1.35344	1.32093	0.85954	0.729334	1.0604	0.908355	1.13362	0.897693	0.909056	0.699414	0.687827	0.848558	1.07251	1.02513	1.18442	1.32163	1.16629	1.00312	1.0075	0.88686	0.962436	0.896138	0.964776	0.949015	0.884587	0.902747	0.948929	0.52051	0.813726	0.916009	1.00607	0.847363	0.981412	0.781386
-53.1068	1.26762	0.857952	0.697036	1.03108	1.1115	1.15823	1.2051	1.1533	1.19806	0.95347	0.967007	1.06615	1.2789	0.904513	1.18168	0.848053	1.08892	0.918993	0.827753	1.0077	0.917428	1.08797	0.914617	0.83153	0.812124	0.75642	0.850921	0.998034	0.876517	1.098	1.18309	1.28543	1.03902	1.20812	1.1003	0.986237	0.880855	1.17056	0.96259	1.00324	0.914336	1.17744	0.462018	1.01623	0.88524	1.06327	0.951435	1.04115	0.896131
-53.0097	1.20659	0.88276	0.73086	0.89394	1.02771	1.14196	1.28218	1.01017	1.08615	0.952942	0.925079	1.06887	1.07639	1.00627	1.11139	1.10781	1.14739	0.980817	0.897024	0.975568	0.967863	1.1957	1.06994	1.02003	0.990556	0.983483	0.874089	1.01663	1.14428	1.00094	1.16321	1.38125	0.958568	1.03666	0.923351	0.996283	0.929452	0.991961	1.06694	0.986511	0.887166	0.798858	0.484543	1.06398	1.05896	0.935799	0.983203	0.925097	0.995334
-52.9126	1.12325	0.895336	0.833342	0.840308	1.01509	1.27441	1.09945	0.992822	1.01931	1.04659	1.16933	1.17078	1.04055	0.90619	1.12424	1.18172	1.21837	0.968716	0.869714	0.923781	1.15825	1.22291	1.12003	1.09218	1.0715	1.08723	0.885907	0.97234	1.01122	0.993257	1.09755	1.14883	1.02775	1.02961	1.07089	0.990123	1.02674	1.04886	1.02003	0.923562	0.990995	1.12979	0.506193	0.943515	0.989112	1.02031	0.951526	0.964552	0.913612
-52.8155	0.995306	0.883449	1.07314	0.807863	0.952461	1.0507	1.13997	1.07863	1.01031	1.13788	1.05663	1.1253	1.08637	0.98588	0.977327	1.04958	1.29739	0.953967	0.83784	0.823712	1.23002	1.08908	0.95966	0.931634	0.957484	0.944366	0.80656	1.02876	1.10683	1.17476	1.23729	1.0223	1.0613	0.875764	1.12474	1.12206	0.93007	1.11601	0.95848	0.893822	0.930087	0.975511	0.425465	1.09737	0.927261	0.992599	0.925078	0.99367	0.88618
-52.7184	0.980912	0.854734	1.09821	0.743962	1.14062	1.12047	1.15074	1.05777	1.07029	1.0325	0.925235	1.08267	1.04656	1.08412	1.05449	1.16108	1.31684	0.933919	0.796841	0.627078	1.06456	0.991785	0.944783	0.959365	1.0055	1.02556	0.827138	1.11451	0.919063	1.3309	1.13811	1.22412	0.888577	0.911248	1.08135	1.2137	1.00167	0.996676	0.891729	0.94769	0.896721	0.693318	0.583079	0.91742	1.08845	0.914119	1.08138	0.991364	0.88716
-52.6214	1.02329	0.817605	1.01591	0.898608	1.0002	1.10027	1.29377	1.0071	0.924521	0.902564	1.30086	1.18643	0.909526	0.921684	1.00977	0.917651	1.2126	0.999874	0.74032	0.643057	0.962631	0.91276	1.00265	1.08123	1.13454	1.21878	0.860853	0.972799	1.04366	1.03776	1.12077	1.29848	0.924432	1.04239	1.21691	1.18145	0.871717	0.855229	0.984887	1.128	1.00066	0.783205	0.526043	0.958376	0.879492	1.09901	0.940632	0.877464	0.888465
-52.5243	1.09187	0.716987	0.966385	0.900404	1.0518	1.10496	0.996752	0.928378	1.27841	1.11358	1.12242	1.16562	1.16936	1.08406	1.0895	1.113	1.23259	1.10883	0.676038	0.765343	0.892464	0.865679	1.10624	0.928645	1.18715	1.24103	0.835514	1.03839	0.943095	1.10281	0.992307	0.976397	1.05858	1.02501	1.07349	1.16169	0.875215	0.941867	0.915843	1.01337	0.944399	0.852405	0.489513	0.878504	1.06318	0.946509	0.926318	0.928841	0.991568
-52.4272	1.0894	0.691713	0.905031	0.873311	1.00002	0.899082	1.00646	1.08377	1.00525	1.07106	1.01205	0.988091	1.11228	1.16871	1.08954	1.55271	1.29212	0.929527	0.768504	1.0545	0.955949	0.816448	1.12594	0.830674	1.20448	1.21923	0.852056	1.10957	1.09232	1.1942	0.899602	1.08794	0.900368	0.962595	0.951691	0.960416	0.96073	0.954947	0.959039	1.10794	0.943912	0.740715	0.65227	0.746141	0.943173	0.998429	0.7683	0.838262	0.902585
-52.3301	0.944839	0.817128	0.820029	0.934836	1.06492	1.12411	1.19497	1.01038	1.00094	1.23254	0.995951	0.969164	1.09144	1.07601	0.907537	1.21853	1.33457	0.809271	0.84396	1.16487	0.951898	0.762914	0.97787	0.841936	1.15125	1.10936	0.818031	0.986355	0.980436	1.00319	1.09448	0.998006	0.966332	0.973325	1.04983	0.851131	0.80852	1.07097	0.988125	1.0247	0.995267	0.496759	0.497149	0.782434	0.813574	1.00382	0.935775	0.947137	0.990371
-52.233	1.00024	0.836627	0.915398	0.893794	0.99295	1.10212	1.03089	1.23537	1.08433	1.08695	1.25303	1.02011	1.04882	0.705512	0.912337	1.07145	1.49373	0.807117	0.885397	0.917681	0.812775	0.888847	0.912798	0.91115	1.08053	1.05744	0.857385	1.09702	1.08497	1.1409	1.0644	1.06176	0.947096	0.904039	0.982556	0.97184	0.946	0.780046	0.987516	1.13403	0.994422	0.998314	0.561581	0.914388	1.13479	0.974166	0.885101	0.922667	1.02005
-52.1359	1.15561	0.803167	1.10095	0.857586	1.00875	1.00018	1.20291	1.31914	1.19533	1.42349	1.13991	1.16402	0.989027	0.728465	0.97222	0.954115	1.31581	0.814147	0.891455	0.937398	0.915596	1.10451	0.889225	1.00934	1.00108	1.03448	0.843505	1.05523	1.02443	1.12177	1.04196	1.13076	0.975499	0.972101	1.01676	1.02848	0.752249	1.11781	0.876835	1.03522	1.03156	0.728263	0.574476	0.708919	0.77495	0.990056	0.946276	0.999562	0.968571
-52.0388	0.90349	0.742989	0.933077	0.842727	1.13859	0.981998	1.20905	1.12932	1.10108	0.992845	1.08847	1.0295	1.1153	0.97814	1.00957	1.36359	1.31533	0.825769	0.879823	1.09057	1.13939	1.13492	0.861645	0.9221	1.05826	1.06335	0.862599	0.977826	0.930972	0.952156	1.18882	0.915397	0.900695	0.900278	0.933943	1.03096	0.93224	0.878158	0.984501	1.03048	0.908082	0.857964	0.544427	0.756746	0.864022	1.06283	0.893259	0.952693	0.938665
-51.9417	0.778055	0.701474	0.810659	0.880369	1.05442	1.11664	1.0734	1.21908	1.0861	1.01503	1.19491	1.00885	1.17166	0.95348	0.867888	0.946883	1.2147	0.89686	0.914031	1.05285	1.10245	1.14192	0.831192	0.873621	1.0462	1.03871	0.838208	1.06401	1.01514	0.972354	0.928137	1.21422	0.936797	0.837039	0.712374	0.944921	0.915178	0.914813	0.982197	1.08996	0.971678	0.801118	0.533977	0.683916	0.820389	0.907269	0.821595	1.01151	0.965274
-51.8447	0.906	0.697285	0.779159	0.825626	1.12305	1.23868	1.1229	1.13517	0.990063	1.0664	0.969153	1.1029	1.25481	1.07156	0.885746	1.09022	1.2707	0.951485	0.983992	1.02027	1.05781	1.10211	0.794992	0.902665	0.895681	0.907041	0.897815	0.912589	0.849448	1.15041	1.12242	1.19451	0.994677	0.969933	1.05933	1.05976	0.784772	0.993081	0.947686	1.10225	1.02066	0.671198	0.502957	0.89867	0.940994	1.11697	0.877393	1.02746	0.990226
-51.7476	1.02534	0.723027	0.853633	0.852547	1.08176	1.05086	1.27175	1.41151	1.02137	1.28639	0.923081	1.10599	1.06855	0.971872	0.965043	1.34192	1.58599	0.973178	1.12546	0.997997	0.997774	1.05532	0.801476	0.905708	0.875808	0.87527	0.929307	0.949276	0.930449	1.23364	1.13606	1.09623	0.867031	0.847291	0.746977	0.946457	1.03248	0.80347	1.03127	1.00335	0.974584	0.91182	0.47409	0.907335	0.821283	1.12	1.09312	0.991882	1.07988
-51.6505	1.14037	0.763734	0.981094	1.02791	1.09469	1.01271	0.968757	0.814135	1.10342	0.991705	1.22878	1.10394	1.01366	1.12391	0.769304	1.32757	1.15807	0.855175	0.998345	0.908976	0.809051	1.00504	0.829302	0.895751	0.921261	0.893445	0.914592	0.916537	0.875033	1.11176	1.05488	1.29382	0.98224	0.909172	0.909216	1.07346	0.929518	0.94899	0.884024	0.993853	0.901365	1.06379	0.470135	0.720616	0.824828	1.02904	1.00051	0.949939	0.977984
-51.5534	1.12861	0.751774	0.993277	0.918288	1.04352	1.07285	1.05032	1.18004	1.18122	1.16049	1.3579	1.18469	0.990027	1.15367	0.902729	1.34788	1.25453	0.667323	0.736935	0.786582	0.555985	0.94326	0.830087	1.11822	1.15778	1.19908	0.892624	1.00042	0.983591	1.01048	1.01226	1.29592	1.00043	1.09583	1.0425	1.07589	0.883128	0.915243	0.862669	0.963948	1.04465	0.69691	0.526346	0.835483	0.968901	1.01872	1.10362	0.868645	0.988541
-51.4563	1.07209	0.757668	0.990079	0.671308	0.937917	0.958735	1.12602	1.04581	1.15403	1.08162	1.01706	1.02111	1.13697	0.745064	0.828554	0.952864	1.57792	1.01358	0.910948	0.833148	0.804883	0.94023	0.83825	1.19382	1.23889	1.27582	0.923525	0.882514	1.07599	1.03764	1.21834	1.15376	0.883688	0.995013	0.845798	1.21425	1.03896	0.91525	0.975043	1.02012	1.04275	0.905662	0.501326	0.887034	1.18042	0.936523	1.00905	0.945105	1.00384
-51.3592	0.92606	0.799267	0.95612	0.925735	1.11219	1.06489	1.01285	1.2962	1.11461	1.36584	1.08082	1.16414	1.36251	1.34807	0.872802	1.10204	1.21487	1.19163	0.989707	0.879388	0.968749	1.05469	0.861166	0.97569	1.00918	0.894779	0.893576	0.885324	0.905829	0.941175	1.02424	1.16542	0.886467	1.04705	1.03113	1.15631	0.849461	1.0015	0.915682	0.982593	0.956018	0.747874	0.538034	0.848835	1.0413	1.02971	0.869928	0.955821	0.993464
-51.2621	0.877964	0.799038	0.932398	0.820278	1.05052	1.09291	1.17795	0.949518	1.1878	0.935671	0.975222	0.89355	1.031	0.826943	0.789272	0.85263	1.26413	1.03328	0.877958	0.924977	0.96255	1.09144	0.87247	0.922284	1.09305	0.974509	0.834033	1.00041	0.991261	1.08603	1.14661	1.28311	0.923521	0.867437	1.10599	1.0477	0.788331	1.02545	1.11319	1.04095	1.04378	0.877222	0.562735	0.956221	0.904258	0.911475	0.9262	0.914813	1.09861
-51.165	0.878839	0.777896	0.913794	0.891383	1.08659	1.08167	1.06355	1.45805	1.29632	0.993961	1.03963	0.99795	1.13369	1.02633	0.84491	1.2367	1.34671	1.04036	0.830107	0.882958	0.979015	1.08934	0.877966	0.951242	1.33371	1.28463	0.960725	0.871351	0.928816	0.794277	0.941455	1.21635	0.9258	0.825673	1.0036	1.12654	0.846001	0.984417	0.879644	0.970859	0.945678	0.973815	0.647827	0.966306	0.899298	0.925458	1.06662	0.897904	0.909771
-51.068	0.920905	0.774498	0.986404	0.86395	0.931137	1.06798	0.942896	1.19063	0.909608	1.02809	1.08279	1.12001	1.07663	1.11524	0.881177	0.884976	1.2962	1.13015	0.814205	0.797134	1.00681	1.20826	0.989441	1.05044	0.980442	1.00189	0.898195	0.942174	0.991609	0.947836	1.16008	1.13101	0.854526	0.970065	0.79038	1.04226	0.870222	1.07037	1.01166	1.19415	1.11578	1.10585	0.626516	0.986514	0.984222	0.840694	0.979101	0.921536	0.929945
-50.9709	0.949889	0.760318	0.988813	0.843009	1.0595	1.18433	0.713888	1.05501	0.994864	1.0667	1.18889	1.0286	1.13389	1.21032	0.798944	0.829379	1.33029	0.998203	0.962793	0.83127	0.915694	1.25637	1.02492	1.06111	0.881037	0.909466	0.893652	0.969766	1.21523	0.936444	1.00979	1.12172	0.952866	0.763525	0.793364	1.15264	0.913371	0.834605	0.957085	1.081	1.06397	0.967398	0.692581	1.03356	0.801696	1.05424	0.845553	0.899905	0.953756
-50.8738	0.952709	0.724576	0.850818	0.988721	0.946723	1.12985	1.05851	1.12533	1.15978	1.00999	1.13516	1.16811	1.24948	1.02611	0.910663	1.13676	1.05494	0.920899	1.01533	0.881506	0.905432	1.16289	0.908411	0.894733	1.28935	1.19767	0.910245	1.01061	1.15258	1.01114	1.23434	1.4027	0.90913	0.934994	0.673417	1.05041	0.954387	0.90302	0.948575	1.21622	1.10075	1.29475	0.56534	0.996067	1.12493	0.842967	0.930016	0.883163	0.952655
-50.7767	0.95541	0.749531	0.805219	1.01785	0.948791	1.0404	1.02653	1.33106	1.20484	1.18771	0.868796	1.07429	0.953721	1.00692	0.885478	1.01664	1.04703	0.952872	0.875755	0.963943	1.05688	1.17431	0.959475	0.838929	1.13523	1.05639	0.884759	1.00223	1.02661	0.977202	1.09702	1.04488	0.934973	0.922936	0.812479	0.907237	1.04181	0.954007	0.901506	0.892864	0.962079	0.883088	0.550434	0.880727	1.13294	0.78059	1.05734	0.991773	0.95473
-50.6796	0.958052	0.804834	0.805819	0.821605	1.04053	1.03253	1.19336	1.00301	1.11945	1.22351	0.949073	1.08353	1.10854	1.04932	0.880454	1.423	1.27617	0.945846	0.829068	1.04283	0.99666	1.23817	1.09433	0.838414	0.69991	0.700384	0.933232	1.03133	1.09129	1.14343	0.980553	1.05472	0.87674	0.816531	0.871787	1.0099	0.91048	0.87162	0.858746	1.02621	1.11337	0.921023	0.580218	0.884597	1.06396	0.993636	0.960638	0.990786	0.898447
-50.5825	0.847721	0.785836	0.773259	0.901465	1.0421	1.07279	1.26412	1.22783	1.18957	1.03054	1.30181	1.04777	0.994452	1.19193	0.832044	0.842475	1.23002	0.919319	0.828825	1.11994	0.830602	1.26196	0.928567	0.888823	0.98487	0.993413	0.918708	0.931573	1.24992	0.948993	1.02734	1.11768	0.981684	0.932161	1.15227	1.00063	1.05133	1.04661	1.03364	1.11146	1.06973	0.745477	0.580079	0.829983	1.01586	1.04798	0.939124	0.894026	1.01665
-50.4854	0.778028	0.751246	0.8037	0.892907	1.05627	0.994453	0.841037	1.32258	1.04925	1.04976	1.15064	1.10008	1.1819	1.1241	0.853413	1.25512	1.27223	0.955951	0.923389	1.02646	0.770943	1.2363	0.852122	0.887709	1.11815	1.13774	1.02443	1.05563	1.10979	1.02401	1.01033	1.33486	0.936584	0.956219	0.993867	1.08813	0.802938	0.900396	0.969319	1.10269	1.02131	0.952809	0.674855	0.86751	1.12913	1.12114	0.97101	0.895583	0.902269
-50.3883	0.789609	0.685471	0.960144	0.947168	1.01453	1.0406	1.16806	1.07997	0.880445	1.05043	1.10486	1.07811	1.21944	0.835581	0.899456	0.957576	1.29343	0.933356	0.959887	0.98745	0.719066	1.11174	0.954301	0.783548	0.948055	0.984671	1.01609	0.918873	1.27344	1.10578	0.947388	0.982277	0.924055	0.892493	1.04634	0.956213	0.715235	0.89387	1.11022	1.18626	1.02475	0.765279	0.541873	1.04814	0.976769	1.07591	0.955861	0.965042	0.923389
-50.2913	0.723945	0.661233	1.08945	0.720253	1.10035	1.07813	0.791689	0.785822	1.11795	0.956206	1.4369	0.986078	0.961582	1.10072	0.888518	1.02154	1.21585	0.792306	0.880253	1.05738	0.682754	1.05008	0.948979	0.864514	0.918081	0.924993	0.9641	0.890872	1.16193	1.02804	0.918981	1.21025	0.902413	0.990025	0.923547	1.00517	0.872087	0.863363	1.16674	0.990593	0.974869	0.814648	0.647695	0.855028	0.962086	0.985329	0.814593	0.96309	0.978281
-50.1942	0.619658	0.657762	1.20519	0.866319	1.00039	1.06953	1.00063	1.37061	1.05352	1.18179	1.05175	0.973292	0.957422	0.995782	0.895754	1.1313	1.17907	0.81139	0.783144	1.05321	0.733206	1.01986	0.889906	1.03804	0.958165	0.912011	0.999991	0.926084	1.04381	0.912735	1.05277	0.937449	1.00359	0.97508	0.874368	1.00343	0.966656	0.958261	0.950562	0.909911	1.00909	1.03352	0.598862	0.784435	0.812602	0.91807	0.857293	0.943107	0.882494
-50.0971	0.807345	0.773247	1.0962	0.855308	1.13348	1.20933	1.06453	1.13185	1.10714	1.258	1.01096	1.0447	1.19857	1.17386	0.793974	1.13508	1.22906	0.91054	0.677297	1.01199	0.827041	1.03504	0.987937	0.945202	0.95316	0.936097	0.968867	0.992281	1.15504	1.05301	1.17809	1.04103	0.941554	0.830879	0.887392	1.32529	1.09904	0.84365	0.98542	1.10388	1.08113	0.887003	0.597335	0.864785	0.919347	0.919513	1.03876	0.868533	0.924231
-50	0.969955	0.823827	1.02081	0.890362	0.997588	0.983042	0.97597	1.07042	1.16501	1.25896	1.36461	0.997982	1.04685	1.48514	0.794218	1.29705	1.09029	0.843699	0.862546	0.929005	1.19416	1.11807	1.02739	0.867258	1.00648	1.02042	1.00156	0.869117	0.892938	1.01279	1.28061	0.847851	1.01632	0.90015	0.809099	0.995712	0.855928	1.03481	1.09825	1.02035	0.985154	1.12366	0.573433	0.794017	0.760337	0.984119	0.860388	0.945909	1.01744
-49.9029	1.08241	0.744597	1.01264	0.570947	1.06894	1.08183	1.45381	1.27858	1.06038	1.03566	0.972988	1.05742	1.02282	1.25803	0.787633	1.07699	1.01099	0.80144	0.97364	0.923617	1.37372	1.33682	0.949698	0.819105	1.17646	1.22522	0.921923	0.932507	0.927721	1.0453	0.848219	0.831918	0.989812	0.959263	0.868904	1.01669	0.846124	0.990924	0.901703	1.09462	0.965572	0.952682	0.477508	0.841159	0.946373	0.921949	1.04354	0.946208	0.911011
-49.8058	1.06373	0.657377	1.0287	0.848828	1.06475	1.10152	1.08926	1.00186	1.22167	1.15457	1.01043	1.05912	1.10899	1.1428	0.715761	0.987828	1.18256	0.808344	0.936424	1.07342	1.17818	1.21992	0.877587	0.873351	1.15578	1.13905	1.01827	0.973111	1.11625	0.946022	1.06246	0.963838	0.893908	0.956619	1.02787	0.90565	0.909853	0.870454	0.921007	1.13561	1.04513	0.788668	0.638138	0.930422	0.844505	0.858592	0.976365	0.915709	0.932397
-49.7087	0.97948	0.566162	1.05688	0.812724	1.03109	1.11779	1.01837	0.961979	0.856173	0.894284	1.11022	1.09864	1.37855	1.34015	0.777096	1.18116	0.955092	0.904419	0.889134	1.05329	1.106	0.935196	0.808269	0.978797	1.03977	0.907389	0.981459	0.941218	1.12107	0.80193	1.05627	1.12272	1.02357	0.842191	1.12784	1.11359	0.966189	1.08508	1.06095	1.05873	1.15395	0.896303	0.639619	0.864634	0.953059	1.05502	0.739649	0.845847	0.961403
-49.6117	0.94888	0.676754	1.17211	0.813527	0.960002	1.08889	1.17844	1.06439	1.00827	0.958372	0.805883	1.15974	1.09652	1.11018	0.806424	1.3118	1.04049	1.04508	0.836806	0.948193	1.09552	1.05599	0.893877	0.882341	0.799633	0.787238	1.03794	0.82033	0.906006	0.914523	0.75648	0.925281	1.31054	0.881956	1.45177	0.938131	0.947663	1.09081	1.02588	1.12937	1.01664	0.865271	0.62978	0.952169	0.992868	0.989783	0.856043	0.93561	0.961329
-49.5146	0.942409	0.729435	1.24342	0.816581	0.98252	1.11724	1.15185	1.17367	1.09973	1.02788	1.07593	1.05078	1.15298	1.34105	0.813042	0.869073	1.34985	0.911734	0.876578	0.962572	1.08735	1.15929	0.968714	0.910508	0.752807	0.780279	0.894294	1.07526	1.08617	0.754946	0.82746	0.950724	1.46196	0.956304	1.59714	1.03193	1.05588	1.3499	0.87994	1.08194	1.037	0.810003	0.530457	0.866797	1.17754	1.19179	0.933828	0.907198	0.907548
-49.4175	0.984196	0.666296	1.22688	0.877373	1.02083	1.12384	0.88977	1.07039	0.908357	1.02787	0.840623	0.955494	0.962299	0.939429	0.733592	1.12966	1.16053	0.884408	0.905162	0.985773	1.07349	1.22761	1.02201	1.18792	1.0926	0.999705	0.92911	0.93177	1.11712	0.867422	0.907305	0.860607	1.56007	0.957237	1.50598	1.06957	1.05811	1.68366	1.12789	1.19109	1.05772	1.05692	0.494922	0.928226	1.00816	1.20259	0.891672	0.945071	0.966663
-49.3204	0.989937	0.669341	0.993183	0.891187	0.974015	1.19923	0.94011	1.13939	1.16935	1.13885	1.13137	0.985227	1.10577	0.893155	0.853425	1.26426	1.26421	1.06912	0.911371	1.02662	1.04825	1.19345	1.02147	1.21384	1.04045	0.938649	0.998077	0.920092	1.03542	0.872276	0.900622	1.22377	1.68986	0.911878	1.62004	0.898671	0.773351	1.91437	1.04792	1.043	1.01205	0.915502	0.554669	0.911948	0.998152	1.16119	0.983704	0.94876	1.10951
-49.2233	0.977655	0.705476	0.650915	0.999762	0.985969	1.14817	1.30907	1.11282	1.2617	1.13389	1.06168	1.04539	1.24587	1.04028	0.757007	1.05218	1.02016	1.07134	0.871167	1.13112	1.0492	1.10807	0.994004	1.11401	0.792318	0.737352	0.968985	1.04682	0.949041	0.759144	0.975289	0.895644	1.51972	0.964165	1.60647	0.967185	0.788311	1.91277	0.962497	1.14295	0.993615	1.01515	0.603818	0.90508	0.912485	1.20425	0.776033	0.92549	1.00761
-49.1262	0.867144	0.74375	0.852825	0.809009	1.08564	0.981996	0.961315	1.08496	1.18545	1.06707	1.08441	1.15023	0.853065	1.2464	0.758167	0.940133	1.1295	0.982318	0.807757	1.26746	1.06324	1.29197	1.16813	0.933648	0.90455	0.856918	0.995802	0.994661	0.937885	0.874421	1.09136	0.876703	1.62795	0.903452	1.46751	0.942305	0.951953	1.58297	1.06743	1.17878	0.993923	0.924145	0.586286	0.87198	0.999808	1.02401	1.0185	1.11188	1.15829
-49.0291	0.828946	0.783295	0.959694	0.792062	0.965378	1.03071	0.841163	1.12149	1.10533	0.989868	0.841113	1.16801	1.17267	1.14901	0.806912	1.16931	1.02343	0.95419	0.829339	1.10135	0.900548	1.34675	1.24572	0.878783	0.967873	0.932238	0.957992	0.997526	0.895191	0.88024	1.02638	0.969973	1.68798	0.964583	1.4702	1.09709	1.18944	1.84731	0.893268	1.05359	0.972305	0.951974	0.642266	0.805193	0.969468	1.09538	0.852613	0.89441	0.843952
-48.932	0.935379	0.825385	0.87648	0.832982	0.967895	0.962138	0.844849	1.21842	1.07605	1.00974	1.11835	1.02546	1.01355	1.04404	0.930402	1.01748	0.9258	0.950573	0.807634	0.973315	0.839378	1.1433	1.13025	1.07492	0.933377	0.919064	1.0314	0.933017	1.02439	1.02232	1.17252	1.09489	1.60678	1.04714	1.46903	1.23798	0.924926	1.72475	1.16489	1.20556	1.02141	1.28069	0.538489	0.898853	0.985078	1.10323	0.963628	0.973751	0.961004
-48.835	0.981735	0.985171	0.888498	0.858935	1.06588	1.05453	1.12884	1.2033	1.11415	1.01705	1.04165	1.13303	0.937636	1.15001	0.806583	0.933615	0.996517	0.995977	0.699353	0.921428	0.98125	1.15161	1.07557	1.03952	0.99867	1.0113	0.983444	0.932584	0.988385	0.930828	1.02471	1.05309	1.46978	1.04904	1.12552	0.909416	0.984499	1.58248	1.11617	1.03618	1.01655	0.776424	0.669202	0.984952	1.1941	0.868038	1.03766	1.03452	1.0145
-48.7379	0.998053	1.20381	0.948131	0.824074	1.07109	1.28564	0.755327	1.23992	1.14603	1.1279	1.00861	1.13012	0.910927	1.14573	0.709646	0.936383	1.06977	0.98635	0.705057	1.07035	1.18019	1.2658	1.05127	0.888346	1.11386	1.15624	0.948535	1.02002	0.809063	0.788173	0.999006	0.769101	1.34039	0.986713	1.26223	1.24693	0.773724	1.87262	0.970223	1.03166	0.945164	0.953081	0.535904	1.31685	1.00589	1.09622	0.974185	1.02701	1.06583
-48.6408	1.00496	1.07634	0.834222	0.885382	0.987246	1.0544	1.1004	1.07221	0.984256	1.26908	0.967656	1.10903	1.07037	1.19306	0.732658	0.78728	0.956307	0.949207	0.767753	1.31967	1.40767	1.1683	1.07641	0.963322	1.0392	1.06637	0.947541	1.02819	0.838323	0.865205	1.10136	0.926875	1.54056	0.933686	1.48445	0.870011	0.856727	1.68221	0.991252	1.10072	0.977593	0.785469	0.507479	1.27648	1.04959	1.22545	0.962086	0.93338	1.078
-48.5437	0.997533	0.994407	0.814306	0.794264	1.01462	0.916312	0.822731	0.861519	0.970821	1.02645	0.916707	1.06624	1.08594	0.874968	0.789323	1.02587	1.12313	0.832466	0.840041	1.06653	1.11778	1.14208	1.07684	0.973797	1.01115	1.03664	0.94772	0.997657	0.912753	0.933265	0.958147	0.992033	1.42367	1.12017	1.33622	0.975033	0.850431	1.32692	0.885928	1.07821	0.977375	1.03877	0.608757	1.19732	1.41351	1.14089	0.960833	0.986588	0.985634
-48.4466	0.96146	1.00356	0.982377	0.929916	1.12211	0.89915	0.920309	1.10258	1.2205	1.05001	1.13738	1.21918	1.01798	1.6036	0.856212	1.04925	1.09993	0.79158	0.879896	0.93164	0.969977	1.25839	1.02786	0.855267	1.07632	1.12721	0.90056	1.04059	0.992351	0.823356	1.05339	1.1282	1.46226	0.942269	1.57269	0.949233	0.917146	1.64527	1.08686	1.12249	0.966354	0.951036	0.581897	1.24106	1.15184	1.05766	0.955422	1.0349	0.986911
-48.3495	0.957956	1.00965	1.0939	0.790643	1.00571	0.943379	0.920104	1.10851	1.07921	0.917969	0.82092	1.29985	0.964563	0.890991	0.825047	0.841476	0.733638	0.902404	0.854884	1.03326	1.10633	1.30201	0.934519	0.815195	0.954259	1.0178	1.01307	0.947267	1.11109	0.949731	1.06493	0.906534	1.48648	0.875429	1.25123	1.19961	1.2395	1.88621	0.947213	1.07208	1.02049	0.617893	0.503142	0.920798	1.08194	1.1947	1.15898	1.11728	0.935063
-48.2524	0.970738	1.0142	1.17716	0.773155	0.994054	1.04846	0.692432	1.04384	1.07888	1.15522	0.946315	1.37536	0.990559	1.05309	0.845124	0.893111	0.996632	0.962187	0.752643	1.05254	1.08899	1.30929	0.819001	0.814352	0.738582	0.808411	0.94494	1.01278	0.939621	0.863676	0.986657	1.12904	1.48942	0.886229	1.2378	1.03669	1.06337	1.58822	0.962836	1.01374	1.08264	1.13106	0.555418	1.01094	0.963825	1.15887	1.05209	1.05771	0.861748
-48.1553	1.23078	1.12524	0.983606	0.877746	1.00234	1.21016	0.971234	0.939768	1.07179	0.923928	0.890392	1.30869	1.08081	1.06081	0.801219	1.08727	1.07077	0.996449	0.611786	1.03064	0.994786	1.23163	1.09734	0.915503	0.839488	0.833383	1.06258	0.945747	0.832717	0.882866	0.785169	1.05904	1.4067	0.936841	1.21802	1.13608	1.0372	1.69848	0.899666	0.96664	1.02807	0.671066	0.527574	1.05103	1.13214	0.801652	0.990483	1.08962	1.10758
-48.0583	1.38745	1.24639	0.871074	0.863759	1.02769	0.96775	0.856912	1.04953	1.06565	0.968741	1.1213	1.28896	0.944269	0.961794	0.874385	1.26922	1.09273	0.970301	0.741371	0.963402	0.968783	1.22033	1.27996	0.963542	0.942085	0.898807	0.938162	0.89941	1.00439	0.929388	1.00352	1.17949	1.42293	1.08381	1.26808	1.03751	1.14259	1.63673	0.930964	0.915901	0.980736	0.972403	0.660376	1.13451	1.02701	0.833588	0.932262	1.01951	1.06667
-47.9612	1.33734	1.38773	0.920578	0.853761	1.06772	0.988649	1.0786	1.1449	0.905865	1.12584	0.960607	1.24246	0.970625	1.01856	0.848791	0.9565	0.945347	0.954758	0.803367	0.956501	1.01239	1.34175	1.27112	0.905359	1.04807	1.04513	1.07279	1.10202	0.846405	1.00366	0.997018	0.996063	1.34225	1.02444	1.33811	1.15036	0.943888	1.4324	1.04939	1.12477	0.990668	1.20355	0.457291	1.07273	0.950024	1.04719	0.953371	1.06898	1.05543
-47.8641	1.22567	1.4875	0.946177	0.777445	1.05502	0.986899	0.815506	0.842301	1.14817	1.48948	0.816121	1.25336	1.04027	1.27915	1.01768	1.16641	0.963286	0.960428	0.730185	1.07028	1.19523	1.35166	1.22672	0.905395	1.19551	1.21792	1.09874	1.03041	0.822388	0.849504	0.882858	1.11035	1.33881	0.949622	1.35268	1.48979	1.13639	1.32059	1.03681	0.918496	1.10395	0.858723	0.405437	0.901813	0.982148	0.872236	0.745721	1.16299	0.980411
-47.767	1.08321	1.56649	0.959824	0.908352	0.90403	1.00701	0.995668	1.18856	0.984299	0.948561	0.886187	1.12858	0.968636	1.15923	1.09055	1.08166	0.967855	0.910334	0.76618	0.87448	1.0393	1.30583	1.16455	0.934543	1.36368	1.40395	1.07752	1.09004	0.986025	0.850449	0.989718	1.06566	1.25398	1.18094	1.06866	1.11766	0.88463	1.3998	1.05623	1.18041	1.08715	0.683733	0.497607	1.02575	1.07341	0.905088	1.06437	1.15477	1.10097
-47.6699	1.13799	1.42574	0.957286	0.80642	0.925325	1.03549	1.15488	1.05871	0.958896	1.16643	0.924763	1.10891	0.897353	0.987484	1.29259	0.788934	0.988542	0.832359	0.856765	0.523897	0.71397	1.12201	1.0957	1.03601	1.06658	1.1111	1.04421	0.952473	0.874233	0.868359	0.914502	0.836477	1.29348	1.01619	1.07539	1.24098	1.30127	1.36073	0.994994	1.07606	1.02392	0.777136	0.570336	1.0964	1.2742	1.056	1.20081	1.01276	1.09997
-47.5728	1.13388	1.30205	0.966253	0.682444	0.939336	1.14863	1.3779	1.17081	1.12963	1.09347	0.953986	1.26216	1.01479	0.937677	1.33962	0.87392	1.05441	0.946086	0.790595	0.834999	1.07519	1.0233	1.10905	1.05759	0.843804	0.875607	1.03574	0.952826	0.83599	0.960391	1.0729	1.0657	1.23987	0.951155	1.1558	0.956263	1.06289	1.67838	1.03151	1.12728	1.0489	0.805868	0.594306	1.13644	1.27617	0.970097	1.02126	0.99131	0.972114
-47.4757	1.01199	1.21245	0.998234	0.844073	1.06619	1.03709	0.891573	1.03514	1.13261	1.11988	0.954766	1.20869	1.02349	1.19069	1.48938	0.801013	1.08857	1.01993	0.698201	0.99827	1.23272	1.09484	1.2868	0.91941	0.769673	0.754808	1.04057	1.03786	0.951007	0.950321	0.8761	1.07526	1.22835	0.98271	1.4024	1.05198	0.855378	1.19395	0.913989	1.00467	1.053	0.677712	0.538125	1.30394	1.04841	0.964071	1.27926	1.0336	1.09445
-47.3786	0.965585	1.28471	1.01738	0.998663	0.912789	1.21338	0.995827	1.05714	1.26821	1.2347	0.967051	1.25259	0.962295	1.24816	1.34717	0.947441	0.940435	1.01403	0.55336	0.865881	0.982858	1.20125	1.17352	0.908479	0.912046	0.877998	1.15081	1.02156	0.899856	1.01175	0.877295	0.92632	1.20241	1.01334	1.00618	1.06554	0.859884	1.35618	1.06506	0.96292	1.01228	0.670209	0.568854	1.04589	1.31751	1.14976	1.18226	1.06815	1.15614
-47.2816	0.95693	1.43791	1.0301	0.719472	0.886508	1.04634	0.8148	1.06031	1.10933	1.191	0.901241	1.23339	0.974487	1.09029	1.37619	0.978211	0.860782	0.972567	0.582122	0.930132	1.04768	1.3251	0.914718	0.961173	1.16267	1.12318	1.07765	1.02732	0.876394	0.780434	1.08282	0.928374	1.26373	0.931242	1.26308	1.13591	1.00099	1.57807	0.976273	1.01354	1.01623	0.993374	0.458632	0.949301	1.09119	1.09725	1.43492	1.01317	1.18087
-47.1845	0.960974	1.3025	1.02368	0.858333	0.969104	1.03508	1.07646	1.10853	1.05586	0.972244	1.10464	1.20302	1.11057	0.863978	1.29936	1.18805	0.886004	0.913334	0.697687	1.0927	1.26984	1.31233	0.940543	0.909788	0.949691	0.908481	1.03109	0.988689	0.881632	0.672364	0.900386	0.730971	1.15283	1.01149	1.22354	0.88651	0.914407	1.77843	0.964015	1.05686	0.898844	0.710219	0.538006	1.10109	1.14451	0.963815	0.954461	1.03774	0.943969
-47.0874	0.956005	1.1937	0.991844	0.864772	0.989093	0.98232	0.847805	1.17592	0.999396	1.09361	1.06723	1.34532	0.901804	0.824677	1.24059	0.767434	0.885743	0.911407	0.68725	0.96956	1.20784	1.24372	1.01192	0.850897	0.803817	0.770314	1.08498	1.02055	0.75067	0.879097	0.796832	0.90236	1.20126	0.941521	1.03562	0.917253	0.973029	1.77611	0.884036	1.15384	1.04719	1.09406	0.529123	1.05967	1.11939	0.984053	1.01355	1.09134	1.25935
-46.9903	0.933008	1.13812	0.909165	0.880462	0.918217	0.939047	0.82474	1.13884	0.92792	1.00152	0.914201	1.36238	1.23486	0.775151	1.39119	0.890363	0.951961	0.934537	0.678279	0.917423	1.16357	1.0634	1.17438	0.77699	0.792154	0.785211	1.0999	1.14151	0.888929	0.747688	0.891762	0.979788	1.13707	0.882221	1.18522	1.14949	0.844032	1.38703	0.95997	1.04299	0.969444	1.02304	0.514911	1.21322	1.20176	0.999466	0.97588	0.984075	1.0489
-46.8932	0.907109	1.13924	1.02758	0.886504	0.977507	0.957928	0.982326	0.830989	1.07626	0.975492	0.82121	1.29378	1.07545	1.44476	1.19793	1.07989	0.772005	1.00778	0.672239	1.0073	1.15475	1.034	1.17732	0.741473	0.874589	0.865819	1.00222	0.970512	0.830839	0.791725	0.86912	0.948577	1.17057	0.844964	1.34925	1.07918	0.995245	1.37672	0.911135	0.924424	0.964735	1.06957	0.469221	1.18119	1.20846	0.939561	1.34668	1.05325	0.95545
-46.7961	0.879757	1.16871	1.24654	0.829551	0.942641	0.963311	0.825538	0.932655	1.12754	1.00375	0.882553	1.2833	1.06441	0.967442	1.22836	1.06037	0.923486	0.971464	0.68399	0.973122	1.16447	1.08007	1.10049	0.72515	1.00407	0.979283	0.890814	1.1536	0.748357	0.934996	0.808394	0.906799	1.30253	0.859084	1.09465	0.817055	0.822197	1.19993	0.998052	1.00097	1.01695	0.970362	0.644253	1.08486	1.38126	0.969151	1.01653	1.00241	1.13143
-46.699	0.903994	1.17555	0.982876	0.883435	0.986127	0.873747	1.00689	0.974458	1.04563	1.00773	1.06948	1.25691	0.962299	0.77037	1.18566	0.849476	0.917442	0.880367	0.704637	0.876918	1.18346	1.18949	1.16875	0.814152	0.792616	0.756024	0.92554	1.11836	0.777467	0.765935	0.956137	0.82033	1.19017	0.847089	0.903208	1.11707	0.962016	1.25584	0.925405	1.06096	0.917578	0.82223	0.500985	1.08902	1.10045	0.878609	1.19637	1.01622	1.09979
-46.6019	0.889469	1.14502	0.840862	0.920785	0.906911	1.02513	0.783928	1.02662	0.850987	0.977855	0.877315	1.26355	0.990955	1.03698	1.18778	0.950902	0.874262	0.899862	0.492359	0.942739	1.18685	1.19734	1.23219	0.882607	0.711731	0.678563	0.849618	0.95201	0.870998	0.888803	0.856356	1.07533	1.13776	0.758218	1.00808	0.865521	1.04028	1.23314	0.926822	1.09455	0.994975	1.11331	0.525969	1.13891	1.10572	0.728589	1.14439	0.946141	1.03347
-46.5049	0.797421	1.03972	0.942145	0.883976	0.968648	1.05697	0.716034	0.947174	1.1554	1.0971	0.866782	1.39425	0.892103	1.02711	1.17061	1.07796	0.958379	0.915683	0.451401	1.0108	1.16744	1.00205	1.286	0.909967	0.891992	0.892698	0.864488	1.00495	0.757994	0.811362	0.987677	0.990959	1.04828	0.850288	1.17693	1.01828	0.92017	1.11275	0.91536	1.09464	0.992648	0.803464	0.522244	1.05988	1.08589	0.953046	1.05839	0.995949	0.910807
-46.4078	0.809079	1.09912	0.945794	0.856071	0.980486	1.10484	0.832968	0.844911	0.940517	1.23396	1.01622	1.09428	0.921893	0.954746	1.13027	0.894035	0.93072	0.924155	0.753085	1.08335	1.10244	1.03688	1.2392	0.879474	1.00406	0.976071	1.00754	0.943953	0.815837	0.816404	0.87465	1.07049	1.24297	1.00775	1.18719	0.939638	0.86714	1.37748	0.91027	0.962058	0.987235	0.780347	0.531303	1.25211	1.28673	1.01831	1.23495	0.960857	1.01111
-46.3107	0.872591	1.24085	0.900627	0.890278	0.910437	0.92703	1.05093	0.955738	1.12692	1.03305	0.876843	1.32985	0.86126	1.32225	1.11704	0.978883	0.909599	0.937054	0.792852	1.11085	1.08662	1.18676	1.1421	0.820054	1.08202	0.994064	1.00099	0.995633	0.888967	0.889549	0.848515	0.942255	1.10691	0.932078	1.28111	0.934754	1.03226	1.26484	0.961528	1.09649	0.922292	0.760804	0.553583	0.971	1.11667	0.908323	1.17287	0.980599	0.985319
-46.2136	0.88564	1.29858	1.0799	0.849843	0.850127	0.775446	0.936573	1.06796	1.08527	0.917394	0.935568	1.23092	0.977394	0.848029	1.0627	0.796263	0.857136	0.952167	0.701661	1.11581	1.09538	1.23004	1.15327	0.746914	1.111	1.12064	0.901255	0.921989	0.680952	0.940653	0.97288	1.0291	1.1832	0.859203	1.11083	0.921493	1.09512	1.16308	1.0107	0.936855	0.963675	0.976172	0.505471	1.0038	1.16581	0.915016	1.30705	0.987005	1.07327
-46.1165	0.890538	1.36631	1.20732	0.902743	0.943127	0.887567	0.880057	0.954267	1.03425	0.927	1.03474	1.15314	1.04421	0.983936	1.09643	0.926383	0.897589	0.94274	0.669318	0.995412	1.12486	1.18384	1.15506	0.71921	1.00538	1.05813	0.926022	0.985377	0.794928	0.924485	1.1215	1.02445	1.12762	0.896333	1.35483	1.1312	1.08428	1.43799	0.914079	0.882359	0.916607	1.21107	0.505875	1.17157	1.15791	0.90843	1.11303	1.04008	1.04186
-46.0194	0.87913	1.45402	1.23102	0.792257	0.992565	0.919928	0.902141	0.792955	1.04004	1.20412	0.970564	1.14341	0.867916	0.990513	1.09296	0.978883	0.999298	0.92562	0.633878	0.925817	1.23098	0.95869	1.1381	0.782376	0.630537	0.617462	1.03298	1.00368	0.908366	1.00848	0.972361	0.82724	1.11397	0.914374	1.21963	1.04027	1.08185	1.08105	1.01206	0.971267	1.03146	0.738849	0.47967	1.0886	1.29521	0.822614	1.3696	1.07482	1.07175
-45.9223	0.869962	1.39392	1.21203	0.899945	0.871183	0.801608	0.707908	1.1251	0.751361	0.743993	0.815866	1.14523	0.871697	0.864477	1.07059	1.30828	0.729499	0.893114	0.59224	0.957828	1.49041	0.961751	1.05911	0.756407	0.794467	0.77999	0.987887	1.03283	0.863411	0.94782	0.73353	0.979772	1.16763	0.865404	1.03437	0.892321	0.845058	1.23649	0.980356	1.09129	1.04261	0.806865	0.491647	1.12005	1.13832	0.979418	1.1789	0.976082	1.01908
-45.8252	0.861913	1.25992	1.17171	0.949963	0.866775	0.9519	0.822652	0.679526	0.895257	1.09521	1.01241	1.11272	0.926621	0.783966	0.969014	0.80657	0.89804	0.969248	0.668013	1.06691	1.34128	1.07892	0.949097	0.685871	1.22778	1.24412	1.0746	0.961048	0.920568	0.743513	0.894737	1.04469	1.05591	0.910449	1.34099	0.953342	1.04071	1.31717	0.977618	0.927705	1.04434	1.0294	0.532036	1.29785	1.47896	1.10776	1.19678	1.05206	1.15598
-45.7282	1.09536	1.21142	1.351	0.906163	0.878945	0.921746	0.725506	0.818403	0.913997	0.992887	0.895208	1.11423	0.894054	1.10144	0.982343	0.817242	0.822424	1.0997	0.802491	1.21453	0.98786	0.928262	0.921699	0.618005	1.06298	1.05123	1.06758	0.986266	0.658921	0.858374	0.862163	0.864102	1.09199	0.914246	1.06832	1.25464	0.791355	1.36785	0.979958	1.03038	1.01839	0.875055	0.385059	1.2147	1.10885	0.995383	1.29643	1.0325	1.02844
-45.6311	1.24529	1.20356	1.37352	1.01039	0.972134	1.00391	0.785297	0.758001	0.989367	1.01067	0.905297	1.28296	0.916103	0.758363	1.03719	0.760509	0.861705	0.961955	0.789956	1.18202	0.66322	0.882955	0.926453	0.630102	0.936003	0.914269	0.920215	0.943765	0.783211	0.678722	0.93873	1.02536	1.09425	0.969315	0.939628	1.18925	0.999096	1.21688	0.998869	1.05237	0.973672	0.846319	0.444219	1.00556	1.25481	0.918895	1.27575	0.992019	1.04434
-45.534	1.22819	1.27698	1.08249	0.879216	0.983432	0.905175	0.711846	1.01359	1.20069	1.21852	0.981176	1.21875	0.925047	0.665668	0.929653	0.968903	0.693796	0.898694	0.75777	1.17016	0.594146	1.04834	0.995513	0.802124	0.884688	0.889161	1.04042	0.975164	0.731191	0.776267	0.877333	0.959399	1.128	0.876323	0.991908	0.79925	0.881215	1.0907	0.924839	0.871174	0.942546	0.884444	0.571978	1.22385	1.45458	1.12442	1.14903	1.12977	1.03187
-45.4369	1.17875	1.32394	0.995157	0.989557	0.933372	0.862305	0.805532	0.898741	1.17342	0.879588	0.932933	1.15564	0.922729	0.843084	1.04033	0.879688	1.02195	0.984404	0.686285	1.19963	1.0362	1.13633	1.01879	0.828566	0.780989	0.792353	1.07468	1.10169	1.00021	0.721454	0.892508	1.02871	1.09757	0.958872	1.20895	0.890225	0.965554	1.03833	0.908612	1.15172	0.967837	0.560823	0.499315	1.17941	1.2274	1.03336	1.05499	1.07377	1.03489
-45.3398	1.11313	1.35768	1.00967	0.981169	0.970886	0.882478	1.21476	0.896504	0.837911	0.994183	0.957305	1.08708	0.996318	1.08341	0.901029	0.859032	0.718386	0.969689	0.732111	1.1618	1.00523	1.18561	1.01917	0.782218	0.651097	0.659694	1.01752	0.975148	0.957237	0.856433	0.941884	1.05701	0.978392	0.890999	0.889267	1.05884	0.816224	0.951115	0.986036	1.07687	1.06107	0.660786	0.546683	1.07759	1.34438	1.06537	1.12293	1.10175	1.22973
-45.2427	1.11507	1.33772	1.23324	0.916977	0.950314	0.934562	1.12081	0.916143	1.10308	0.998809	0.996774	1.12569	0.906353	0.96163	0.870515	0.887533	0.948747	0.904761	0.836595	1.09031	0.737745	1.17101	1.00198	0.773933	0.867702	0.825902	1.06375	0.893421	0.937971	0.756777	1.2232	1.04562	1.109	0.93969	0.858474	0.995261	1.08503	0.963922	0.988836	1.04011	1.0139	1.02172	0.413912	1.13974	1.22233	0.803388	1.35871	1.13658	1.09677
-45.1456	1.13586	1.30805	1.32619	1.04961	0.915076	0.835709	0.796266	0.851346	0.964486	0.930097	1.05252	1.03171	0.899602	0.924258	0.926298	0.9154	0.699073	0.864553	0.67164	1.00236	0.889619	1.14732	0.937501	0.757841	0.992291	0.942415	1.01465	0.911098	0.920728	0.879389	1.06533	0.954252	1.10784	0.931518	1.13759	1.0535	0.849015	1.13616	0.980029	1.01849	1.08685	0.785876	0.483443	1.34766	1.12868	0.762642	1.16846	1.00164	0.996086
-45.0485	1.19438	1.25894	1.15791	0.859143	1.02771	0.745147	0.697864	0.900036	1.18675	0.901022	0.891521	1.06526	0.879445	0.935986	0.859869	0.783801	0.798965	0.883611	0.594003	0.972656	0.987335	1.10549	0.778458	0.726136	0.932849	0.95954	1.07744	0.881183	1.04864	1.06963	1.07772	1.02749	1.08905	0.872771	1.1755	1.0757	0.885059	1.30147	0.961322	1.08517	1.01895	0.724269	0.486364	1.23976	0.995242	1.06144	1.08111	1.12385	1.17284
-44.9515	1.13182	1.15807	1.17132	1.04865	0.791539	0.948214	0.655273	1.22994	0.86596	0.994748	1.00228	1.04804	1.02148	0.722919	0.871325	0.95971	0.924581	1.0212	0.691002	1.05943	0.976732	1.03714	0.879154	0.67103	0.997249	1.06674	0.979916	0.940516	0.942054	1.06809	1.06383	1.22994	1.11546	0.905641	0.969415	1.03693	0.935596	1.2127	0.898465	1.06627	0.945963	0.845797	0.358631	0.948495	1.21935	1.06017	1.04841	0.978238	1.06001
-44.8544	1.00872	1.0313	1.27556	0.779992	1.02229	0.920553	0.921873	1.00096	0.824905	0.878984	0.806305	1.11872	1.286	0.702453	0.825215	0.828128	0.803785	0.956345	0.645535	1.02477	1.12018	0.95554	1.10972	0.604223	1.12357	1.21896	0.954387	0.843507	0.964667	1.00571	1.13429	0.99914	1.07788	0.891471	0.909481	0.862213	0.904525	0.920088	1.00346	1.04104	1.10425	0.890875	0.50904	1.10062	1.09874	0.835516	1.09869	1.08566	1.04769
-44.7573	1.10363	1.14197	0.98762	0.782034	0.858282	0.880084	0.888103	0.870605	1.14866	1.00077	0.858296	1.04615	0.919525	1.12541	0.866146	0.786166	0.844281	0.790272	0.528834	0.9294	1.34065	1.06251	1.03521	0.612907	0.937084	0.980297	1.03851	0.964382	0.91752	1.0687	1.048	1.17123	1.15374	0.877957	1.05207	0.874133	1.19229	1.06499	0.85809	0.848655	1.09679	0.896014	0.464624	0.99036	0.910528	0.869115	1.16425	0.963924	0.963858
-44.6602	1.0954	1.23434	0.938994	0.966784	0.94437	1.04866	0.936481	0.974682	0.828949	0.904606	0.873787	1.22152	1.00286	0.925995	0.857114	1.1432	0.748548	0.961056	0.552642	1.13416	1.26636	1.11274	0.973062	0.616279	0.822614	0.823189	0.98074	1.07847	0.943011	1.05226	1.00226	1.04898	1.13462	0.797598	1.05668	0.874101	1.10026	0.915796	0.851015	0.947173	1.01617	0.760151	0.556195	1.02982	1.12288	1.03671	1.0771	1.01826	0.871201
-44.5631	0.880884	1.29008	1.369	0.944048	0.849046	0.795819	0.8043	0.921912	0.909902	0.942819	0.910882	1.0722	0.930173	0.685194	0.856371	0.972481	0.809548	1.05399	0.590149	1.19268	1.12039	1.04951	0.935621	0.609023	0.852175	0.829201	0.943993	0.959966	0.935377	0.941668	0.976995	0.894819	1.09659	0.926396	1.31258	1.01511	1.0548	0.991606	0.910073	1.14056	1.10177	0.890738	0.562444	1.10865	1.34272	0.946658	1.00178	1.18325	1.07845
-44.466	0.900425	1.19277	1.3689	0.808058	0.872291	0.721594	0.761754	0.959937	0.914853	0.94001	1.04061	1.17549	1.06551	0.729025	0.907759	1.00323	0.779461	0.99121	0.655055	0.958724	0.831076	0.944392	0.952549	0.622283	0.856681	0.832123	0.913381	0.960434	0.836907	0.936306	0.877227	0.865422	0.964805	0.850216	0.919414	1.0692	0.87802	0.953992	0.893645	1.24753	1.00779	0.865237	0.536009	1.16369	0.913031	0.888448	1.03486	1.00667	1.03039
-44.3689	1.037	1.01894	1.15375	0.832299	0.927198	0.885748	0.777069	0.764141	0.89116	1.01663	0.829677	1.19862	1.0283	0.814171	0.854794	0.902304	0.733647	1.07226	0.61146	1.00833	0.917841	0.81834	0.996662	0.645801	0.84866	0.8335	0.955851	1.07593	0.700667	0.780968	1.10595	0.912149	1.00344	0.910893	0.996795	0.946724	1.03279	0.900275	0.920694	0.977053	0.952966	1.24701	0.55684	1.10391	1.4888	0.894212	1.03322	0.959879	0.990343
-44.2718	0.917495	1.33354	1.34318	0.728045	0.921922	0.830458	0.68886	1.11445	0.834362	0.714799	0.797985	1.08442	0.844946	0.995135	1.07964	0.941153	0.923111	1.22523	0.513614	1.19972	1.19265	1.00288	0.994318	0.727943	0.695636	0.68222	0.976932	1.03317	0.875406	0.938399	0.837542	1.01495	1.238	0.939139	1.13554	0.908869	0.948767	1.14662	0.925443	0.866281	0.957245	0.964234	0.595961	1.02824	1.14873	0.894976	0.997391	0.999409	0.95669
-44.1748	0.852116	1.46779	1.32587	0.842403	0.879247	0.808866	0.607203	0.818618	1.06983	0.820974	0.958059	1.19927	1.01258	0.744342	1.24343	0.811706	0.730065	1.1058	0.661103	1.03064	1.00798	1.07367	1.02029	0.749672	0.684108	0.677573	0.957055	1.00427	0.758708	0.719551	0.791591	1.06353	1.05178	0.900559	0.869831	0.925667	0.874131	1.01107	0.849845	1.04525	0.952234	0.788901	0.642381	1.10463	0.989007	0.89716	1.15008	1.07968	1.0567
-44.0777	0.894982	1.24133	0.895064	0.790571	0.965587	0.857722	0.832397	0.745404	0.851683	1.07094	0.790068	1.15055	0.83577	0.899525	1.23803	0.75599	0.723828	1.03468	0.719239	0.967586	0.868846	0.916981	1.10289	0.650571	0.955574	0.966193	0.964829	0.975085	0.806341	0.857709	1.02371	0.868404	1.06326	0.928647	0.952373	1.06654	0.968339	1.18879	1.04291	0.884022	0.977498	0.95325	0.494466	1.25279	1.115	1.02842	1.16506	0.999221	1.00823
-43.9806	0.979427	1.26164	1.01619	1.06305	0.862319	0.856227	0.607522	1.10263	0.98444	0.903736	0.91632	1.1613	0.999417	0.672467	1.19395	0.962423	0.713506	1.06017	0.59867	1.11657	0.820783	1.03062	1.03794	0.703975	0.966695	0.935154	0.908931	0.850738	0.91909	0.765296	0.897159	0.900724	0.921557	0.848363	0.989015	0.869313	0.997878	1.24246	0.989696	1.00064	0.884361	1.11988	0.535585	1.03236	1.12053	0.820876	1.12572	0.95601	1.09157
-43.8835	1.08466	1.40532	1.41329	0.894178	0.866734	0.803329	0.701871	0.899141	0.803091	1.04628	0.85306	1.2309	1.07488	0.741575	1.1886	0.862686	0.801435	1.10683	0.605778	1.25645	0.7994	1.27942	0.899213	0.833632	0.847643	0.744285	0.95855	1.01082	0.892713	0.846161	1.08781	0.988379	1.01751	0.829115	1.00156	1.02687	0.942283	0.909937	0.926871	0.887577	0.834995	0.931931	0.588293	1.17403	1.16984	0.910703	1.03788	0.990243	1.05303
-43.7864	0.989209	1.45032	1.25058	1.03669	0.879407	0.959796	0.660738	0.927327	0.853118	1.10542	1.05004	1.01981	1.16616	0.865523	1.15668	0.868553	0.707888	1.16407	0.676725	1.39177	0.791357	1.25957	0.940455	0.881071	0.817428	0.828698	0.904441	1.00639	0.837522	0.977858	0.971383	0.99257	1.10658	1.05871	1.26439	1.48577	1.06513	0.993287	0.975827	1.04195	0.939141	0.809024	0.505285	1.166	1.23379	0.853688	1.17402	0.984541	1.14369
-43.6893	0.960393	1.50273	1.11982	0.926019	0.89199	0.878775	0.732343	1.05623	1.0119	1.04638	1.04205	1.19037	1.06841	0.793868	1.00749	0.771974	0.729348	0.913114	0.712211	1.186	0.922225	1.24108	0.930991	0.95668	0.851049	0.936373	0.986361	0.928717	0.907291	1.0231	0.979661	1.0666	1.05654	0.959569	0.991875	1.07595	0.902796	0.958132	0.979508	1.01863	0.880148	0.976299	0.504814	1.05609	1.17859	0.905887	1.15005	0.907353	1.11656
-43.5922	1.06485	1.56995	1.05294	0.836388	0.793638	0.951425	0.695639	0.790982	0.818827	0.999399	0.781407	1.02445	0.908387	1.06972	1.05358	0.844264	0.685584	0.782506	0.751093	1.00434	1.06233	1.22529	0.820116	1.08863	1.01234	1.09057	0.942582	0.871575	1.02897	1.08454	1.06249	0.955547	1.02037	0.924201	0.932926	1.02933	1.06135	0.891397	0.962324	0.850852	0.857279	0.902825	0.500162	1.12895	1.28189	0.957048	1.06876	1.02546	1.0919
-43.4951	1.09892	1.49147	1.07756	0.827815	0.87497	0.854255	0.72618	0.858508	0.929682	1.06196	0.790918	1.1593	0.980785	1.17398	0.976864	0.858573	0.76928	0.892586	0.796769	0.870886	1.22091	1.21949	0.827992	1.08069	1.0221	1.06973	0.892946	0.899986	1.00766	1.11942	1.07783	0.983409	0.967159	0.91159	0.974763	1.1947	0.855633	0.939909	1.13901	0.802081	0.862381	0.998632	0.466656	1.00201	0.873165	0.959675	0.959952	1.00636	0.974375
-43.3981	1.0978	1.34016	1.14794	0.811797	0.936296	0.86031	0.829705	0.93393	1.23472	0.907427	1.00442	1.15292	1.07975	0.915857	1.09857	0.875458	0.685512	0.989254	0.910141	0.901711	1.10954	1.21869	0.895243	1.00281	0.956086	0.961371	0.94822	0.855279	1.15677	1.10477	1.2671	1.18523	0.995444	0.755562	0.707094	1.12881	0.909774	1.00499	0.964409	0.870782	0.849204	0.626982	0.534108	1.1061	0.950531	1.0244	1.06141	0.960141	0.954628
-43.301	1.04773	1.27057	1.21421	0.903405	0.83469	0.899171	0.778644	0.815998	0.926736	0.915294	0.821331	1.06297	1.04449	0.797135	1.07492	1.02379	0.813513	1.07922	1.05736	1.01468	0.863178	1.27338	0.964712	1.02715	1.0552	1.11607	0.927644	0.888439	1.01405	0.916851	1.16785	1.1511	0.865709	0.805646	1.02	1.05999	0.923167	0.945508	0.953388	0.844971	0.852314	0.784656	0.442864	0.852906	1.00431	0.93309	0.863599	1.02909	1.07786
-43.2039	1.0088	1.20069	1.24418	0.85768	0.902907	0.846791	0.647831	0.658306	0.980238	1.10518	0.970221	1.14343	0.926628	1.29652	0.98473	0.810051	0.632544	0.973836	1.04477	0.995569	1.07341	1.26982	0.976122	1.06897	1.12013	1.18308	0.952399	0.859497	1.13957	0.995112	1.08224	1.12428	1.03667	0.859668	0.942255	1.10226	0.999448	1.01576	0.993931	0.879585	0.909646	0.864885	0.585494	1.24865	1.03083	0.836553	1.05336	1.13682	0.995668
-43.1068	0.992161	1.13024	1.20155	0.840194	0.861973	0.834481	0.560535	0.806915	0.857727	1.00732	1.0365	1.05027	1.00022	0.777108	0.970931	0.900074	0.726212	0.921884	0.993541	1.03078	1.15124	1.14976	0.871416	1.14577	1.11672	1.07469	0.887783	1.00681	0.86441	0.936765	1.04326	1.18962	1.037	0.928829	0.824241	1.1538	1.00338	1.03851	1.08219	1.01576	0.86492	0.708581	0.484678	1.14605	0.951622	0.941727	1.12161	0.980758	1.06769
-43.0097	1.0954	1.12674	1.10643	0.763233	0.928086	0.901943	0.67569	0.715552	1.04004	1.1634	0.857473	1.11211	0.942093	0.662034	1.07559	1.03948	0.675518	0.976788	0.865051	1.17463	0.96424	1.07113	0.801275	1.14171	0.986364	0.919475	0.916021	0.979307	1.00622	0.990227	0.879816	1.00369	1.07105	0.93831	0.973202	1.15215	0.872763	1.07274	0.941876	0.917079	0.795709	0.672958	0.503204	1.14446	1.29192	0.935124	1.10818	0.873647	0.966273
-42.9126	1.25858	1.15672	0.985067	1.01024	0.831991	0.912481	0.564438	0.832087	0.84988	0.872706	0.893254	1.0299	0.801648	0.867081	0.908078	1.00012	0.709343	0.980608	0.900268	1.05605	1.06798	1.01323	0.748418	1.0972	0.792539	0.740851	0.939769	0.986829	0.929478	0.99525	1.02147	1.01219	0.98283	0.88549	1.08292	1.24738	0.920122	0.912814	0.99191	0.991362	0.852381	0.786238	0.666086	1.44008	1.21356	1.01252	1.12105	0.963714	1.00424
-42.8155	1.17262	0.917244	1.02295	0.917518	0.892254	0.892503	0.738106	0.764486	1.10417	0.91906	0.933696	1.1375	0.973092	1.18403	0.901751	0.917286	0.669735	0.958888	1.01734	0.806247	1.31709	1.00853	0.793233	1.19382	0.989663	0.992592	0.907296	0.907455	0.820045	0.938049	1.23412	1.01086	1.12279	0.979499	1.0422	1.06653	1.09263	0.992787	1.04651	0.850329	0.84075	0.839398	0.518698	0.946454	1.12244	1.04188	0.992304	1.03163	0.953218
-42.7184	1.07658	0.820263	1.07099	0.924867	0.960184	0.873905	0.671296	0.865699	0.859454	1.06137	0.77505	1.10614	0.823498	0.831637	0.937541	0.873862	0.727289	0.993121	0.948881	0.919626	1.16224	1.00313	0.870912	1.20297	1.04113	1.07166	0.954682	0.979259	0.761287	0.957011	0.818017	0.990141	1.08413	0.896586	1.37132	1.20874	1.18646	1.03147	1.0909	0.82828	0.802993	0.809631	0.594336	1.04018	1.06676	0.900582	0.998957	0.935418	0.978596
-42.6214	0.960361	1.00826	1.13935	1.02237	0.874156	0.873218	1.03283	0.922531	0.958719	1.11696	0.847305	1.13985	0.875782	1.02	0.837051	0.950096	0.742777	0.967888	0.903746	0.982297	0.993704	0.996319	1.01432	1.03719	0.801286	0.805373	0.977707	0.98045	1.02489	0.84121	0.909255	0.592387	1.15512	0.951546	1.21553	1.40987	1.45162	1.05406	1.05415	0.869911	0.860242	1.01696	0.501317	1.16379	1.12872	0.816019	1.03337	1.01844	0.979836
-42.5243	1.06601	1.00228	1.08592	0.996701	0.932724	0.900382	0.666776	0.833461	0.843501	0.895719	0.773343	1.09664	1.0419	0.76088	0.868929	0.849111	0.802256	0.823723	0.905257	0.943548	0.797794	1.07069	1.07065	1.05043	0.838424	0.85989	0.958755	0.885649	0.874291	0.882231	0.948323	0.990431	1.08041	0.89613	1.03297	1.13807	1.033	0.901273	0.924856	0.981417	0.873141	0.874602	0.514116	1.20232	1.04482	0.874195	0.919362	0.942028	0.900336
-42.4272	1.2826	0.899311	0.971608	0.935373	0.960832	0.950786	0.68119	0.849796	0.98168	1.09456	0.83058	1.15257	0.804958	0.968974	0.909562	0.92792	0.661404	0.862155	0.891662	1.06664	0.820224	1.18566	1.08344	1.15318	1.01405	1.07481	0.948751	0.978208	0.914984	0.82665	0.706405	0.914937	1.08722	0.900006	1.09999	1.22527	1.03019	0.864598	1.00828	0.90752	0.866281	0.984218	0.521415	0.886363	0.973235	0.933607	1.01807	0.942625	0.933313
-42.3301	1.20496	0.985531	1.03597	0.867587	0.983647	0.980112	0.700033	1.02788	1.00609	1.02183	0.948231	1.14192	1.10279	1.07119	1.04461	0.937941	0.757786	0.991885	0.870513	1.27066	0.951824	1.24128	1.00396	1.12592	1.16421	1.15094	0.997481	0.912624	0.850708	0.892918	0.995298	1.23027	1.15786	1.09287	1.19101	0.971598	1.02902	0.948323	1.1075	0.782271	0.90919	1.02359	0.549149	1.14977	1.0293	1.00143	0.969725	1.02629	0.901614
-42.233	1.19699	0.978469	1.10131	0.928621	0.994564	0.902057	0.840866	1.03621	0.865582	0.95512	0.896529	1.09555	1.0092	0.956908	1.06182	0.811589	0.704666	0.89714	0.99374	1.20204	0.803124	1.22829	0.947655	1.0814	1.20835	1.15084	0.970197	0.924429	0.879848	0.818952	0.993584	1.29972	1.14402	1.00823	1.35519	1.08509	1.25028	1.04593	1.00683	0.961112	0.874532	0.974701	0.514787	0.937208	1.25662	1.0433	0.907182	0.983563	0.965587
-42.1359	1.32833	0.784842	1.16858	0.881975	0.97463	0.878336	0.866602	0.750799	1.122	1.00861	0.8367	1.08551	1.06497	0.907472	1.27287	0.848149	0.7313	0.873885	1.00786	1.22522	0.732112	1.07812	0.93769	1.00234	1.04046	0.998292	0.928542	0.963914	0.806059	0.978164	0.961255	1.17452	1.19869	0.798892	1.30359	1.18927	1.07887	0.936592	1.16098	0.897444	0.837046	1.0941	0.585454	0.947393	1.08707	1.04134	1.12032	0.988373	0.900667
-42.0388	1.31785	0.789335	1.20295	0.949638	0.979868	0.898121	0.666582	0.826084	0.843762	0.889033	1.02998	1.0809	0.909743	0.955202	1.22463	0.713355	0.612108	0.99361	0.803761	1.432	0.816475	1.06719	1.0153	0.951007	0.948883	0.914323	0.869672	0.943033	0.965339	0.749396	0.915295	1.10114	1.15302	0.879588	1.12161	1.00306	1.19319	1.28783	1.10547	0.727476	0.832131	0.787972	0.484328	1.14617	1.2826	0.932388	0.948629	0.915706	0.833602
-41.9417	1.23646	0.892889	1.22088	0.832211	0.895567	0.921101	0.592537	0.861069	1.02625	1.03577	0.928143	1.02255	1.11532	0.616173	1.51512	0.859898	0.662138	0.922762	0.881767	1.33394	0.807918	1.12589	1.1367	0.913541	0.895455	0.864642	0.902923	0.868043	0.852746	0.860516	1.02801	0.972981	1.2505	0.79062	1.25413	1.10296	1.226	1.06191	1.07766	0.881318	0.785335	0.795704	0.458562	1.21255	1.29573	0.866095	1.01418	0.950484	0.854803
-41.8447	1.30276	0.927096	1.19526	0.905955	0.912122	0.764331	0.737683	1.01961	0.967463	1.13276	0.886424	1.02373	1.01224	1.17536	1.3385	0.862186	0.684293	0.756629	1.10083	1.08347	0.7529	1.12018	0.943108	0.851318	0.868174	0.837682	0.949329	0.883883	0.937436	0.808721	0.919487	1.12896	1.19211	0.924239	1.22619	0.982643	0.842795	1.15043	1.05639	0.924978	0.922423	0.90987	0.517063	1.04816	1.32958	1.08057	1.09701	1.04432	1.09575
-41.7476	1.25099	0.934202	1.12826	0.899431	1.03669	0.883833	0.643448	0.796713	0.813087	1.05554	0.820333	1.04341	1.05651	0.691991	1.23534	1.00869	0.674427	0.756249	1.00906	1.12153	0.812277	1.10218	0.82803	0.829256	0.870311	0.846408	0.959155	1.05697	0.933123	0.976898	0.949587	0.844929	1.01473	0.997792	1.26043	1.18126	1.01893	1.11574	1.14347	0.986763	0.78537	1.0066	0.503038	1.13802	1.42675	0.939742	1.07559	0.983073	0.977523
-41.6505	0.96307	0.887103	0.978484	1.01117	0.973973	0.833383	0.762233	0.922482	1.04103	1.1269	0.897467	0.940105	0.82982	0.744358	1.30881	0.769761	0.665831	0.776361	0.918921	1.15682	0.873534	1.05962	0.86998	0.887513	0.931282	0.926504	0.956282	0.867283	0.964566	0.885198	1.06062	1.23113	1.16076	1.05734	1.19967	1.07572	1.03218	0.896778	1.11542	0.899635	0.795393	0.846582	0.527874	1.25096	1.51991	0.965752	1.05163	0.91534	0.924982
-41.5534	1.0206	0.921195	1.01228	1.02955	1.06263	0.852681	1.00685	1.00392	0.902095	0.926598	1.08745	0.973002	0.937295	0.941151	1.38346	1.06497	0.738312	0.837455	0.832041	1.18658	0.938553	1.09865	1.00892	1.03496	0.972186	0.97046	0.857667	1.02511	0.798996	0.954205	0.786789	0.745372	1.11776	0.991632	1.24496	0.961114	1.05332	1.07956	1.04582	0.805129	0.763873	0.837005	0.561577	1.28618	1.48536	0.999805	0.88583	0.896353	0.798854
-41.4563	1.25086	0.995882	1.13786	1.00166	1.01639	0.854812	0.696507	0.82992	1.17954	1.13229	0.885679	1.06202	1.14518	0.759233	1.37891	0.876706	0.739948	0.95063	0.815057	1.11968	0.909172	1.17847	1.19636	1.22701	1.00306	0.996344	0.911591	0.985935	0.743462	0.876478	0.821068	0.847562	1.00981	0.976884	1.27961	0.889844	1.01938	0.968842	1.05413	0.961949	0.774721	0.988899	0.523096	1.10711	1.33383	0.930808	0.83133	0.948218	0.92436
-41.3592	1.18199	0.90627	1.02977	1.01664	0.932206	0.824524	0.81246	0.715433	0.779585	1.05967	1.03826	1.03715	1.00951	0.883606	1.27296	0.805398	0.777891	1.08985	0.833019	1.00443	0.832592	1.08151	1.0426	1.25189	1.17325	1.2038	0.98952	0.927096	0.869764	0.922825	0.928081	0.948628	1.10275	0.875822	1.03235	0.948909	0.846306	1.06636	1.04448	0.86129	0.769863	0.865318	0.474578	1.37298	1.79658	0.923323	0.99847	0.860463	1.06009
-41.2621	1.12576	0.892494	0.996262	0.924049	1.00148	0.893104	0.67836	0.961379	1.17384	0.912173	0.988471	0.951887	1.02011	0.975182	1.19781	0.804108	0.798725	0.966378	1.17815	0.999808	0.92717	1.02815	1.00867	1.19838	1.17441	1.21604	0.98214	0.855888	0.853152	0.79915	1.13403	0.848618	1.12299	0.937057	0.808682	0.825952	0.808606	1.0118	1.06025	0.904019	0.745396	0.77083	0.485857	1.13566	1.66397	0.983073	1.06425	0.998206	0.894356
-41.165	1.09479	1.03039	1.11192	0.965166	0.955293	0.847688	0.597843	0.901526	0.979506	0.956006	0.809571	0.880254	0.873184	0.842407	1.26442	0.90269	0.840871	0.960245	1.29826	1.02932	0.995985	1.06199	1.21438	0.988059	0.837538	0.837866	0.888045	0.899647	0.981034	0.943507	0.743153	1.0412	1.15013	0.984873	1.08426	0.776348	1.09082	1.10448	0.967239	0.916696	0.859913	0.596951	0.569237	1.07818	1.46612	0.988171	0.989254	0.911993	0.837517
-41.068	1.0387	1.00663	1.29179	0.939658	0.947972	0.895308	0.617496	0.826831	0.909809	0.856972	1.20408	0.866406	0.877543	0.781641	1.10243	0.935421	0.737255	1.18878	0.968348	1.12711	1.01327	1.11617	1.25143	1.03498	0.801383	0.765667	0.899227	0.918132	0.825538	0.837919	0.911694	0.803389	1.07647	1.06964	1.24981	1.02476	1.17042	1.03021	1.13979	0.798957	0.809823	0.911248	0.445317	1.20702	1.46134	1.02463	0.843676	0.983658	0.911583
-40.9709	0.970056	0.902049	1.50375	1.00261	0.931314	0.92762	0.698036	0.771853	0.930596	1.04125	1.20226	0.934706	0.748026	0.883046	1.00365	0.902787	0.844111	1.17371	0.860046	1.23166	0.948252	1.18052	1.20415	1.21052	0.915588	0.846458	0.89076	0.901522	1.00873	0.985933	1.15336	1.15108	1.23649	0.905227	1.41425	0.750204	1.0194	1.14018	1.00479	0.928679	0.754391	0.880539	0.542341	1.3209	1.57561	0.951704	0.841103	0.954161	0.936869
-40.8738	0.907596	0.853621	1.32348	0.952068	0.970959	0.833304	0.758387	0.964587	1.05099	0.882536	0.881274	0.916295	0.995222	0.662269	1.20663	0.960058	0.790675	1.03684	0.862551	1.33958	0.842078	1.03894	1.07601	1.18046	0.88133	0.856676	0.894419	0.798805	0.879586	0.854631	0.953153	0.935839	1.08029	0.962368	1.50066	0.760988	0.921967	1.16691	1.06364	0.839158	0.863318	1.01643	0.451696	1.32692	1.42886	0.981682	0.925041	0.895668	0.963951
-40.7767	0.881335	0.822022	1.18259	0.891684	0.885016	0.824237	0.616002	0.748475	0.901617	0.999657	0.990582	0.855901	0.888601	0.933382	1.03683	0.900132	0.657437	1.00331	0.950656	1.08617	0.728263	0.986205	1.0239	1.1434	0.858674	0.859042	0.865687	0.894284	0.953462	0.697659	0.855026	0.918132	1.06836	1.16417	1.28155	1.01554	0.92291	0.935231	1.10909	0.810912	0.800323	0.863817	0.549355	1.2714	1.55922	1.07331	0.921914	0.99367	1.1181
-40.6796	0.927473	0.824081	1.12045	0.971551	0.905403	0.844403	0.701266	0.952951	1.0574	0.989413	0.923536	0.924248	0.925643	0.796339	1.1192	1.05206	0.748948	0.999737	1.02102	0.970216	0.71889	1.11118	1.12383	1.09233	0.859223	0.845702	0.881108	0.888648	0.700309	0.805154	0.976884	0.997989	1.16088	1.07687	1.39879	1.13682	1.17557	0.962658	0.912658	0.852605	0.806267	1.0301	0.574276	1.17554	1.71158	0.955336	0.985998	0.982741	0.940286
-40.5825	0.93446	0.855583	1.1534	1.15752	1.06248	0.927199	0.868153	0.848863	1.03727	1.16567	1.03934	0.912609	0.938164	0.907603	1.04435	0.950499	0.693751	1.05606	1.05591	1.1292	0.918403	1.15766	1.19078	1.31821	1.01753	1.01699	0.864337	0.819259	0.83884	0.890284	0.786639	1.30575	1.11145	0.9967	1.00797	1.06485	1.09971	1.05497	1.00861	0.886205	0.764212	0.857023	0.480137	1.50647	1.46692	1.01498	0.998724	0.939783	1.01773
-40.4854	0.921871	0.901808	1.23389	0.997492	0.959873	0.841575	0.902802	0.952971	0.93177	0.993325	1.04947	1.00996	0.922563	1.06516	0.983553	0.918864	0.754142	0.980164	1.016	1.11156	0.987812	1.16489	1.24124	1.68256	1.25472	1.2806	0.928787	0.815063	0.781226	0.749774	0.850204	0.961008	1.08877	0.942934	1.01245	1.27122	0.901501	0.964768	1.05157	0.963967	0.795867	0.824037	0.528495	1.36464	1.32113	1.27536	0.986796	0.972944	0.947877
-40.3883	0.874599	0.737806	0.967263	1.0507	0.902406	0.947741	1.01291	0.915693	1.01506	1.02066	1.24213	0.973245	0.999671	0.88852	0.93004	0.902266	0.750588	0.838164	0.938703	1.0056	0.992169	1.20872	1.14887	1.34758	0.916743	0.925763	0.889864	0.873511	0.865691	0.84599	0.891007	0.951867	1.0917	1.07572	1.00741	0.931992	1.22681	1.0532	1.01702	1.01241	0.808053	1.13779	0.59956	1.33761	1.6038	0.872474	0.906358	0.913485	1.01736
-40.2913	0.892261	0.687305	0.81194	0.941308	1.02676	0.964322	1.02273	0.816294	1.01188	0.911325	1.0451	1.05118	0.83538	0.669656	1.00981	0.987328	0.817553	0.947654	0.863624	1.3178	1.16966	1.22767	1.10325	1.16778	0.805105	0.810952	0.835889	0.837792	0.803079	0.858068	1.10403	0.836537	1.23476	1.0815	1.39367	0.98764	1.06136	1.18835	0.995941	0.905046	0.75974	0.87461	0.484796	1.3731	1.36975	1.10193	0.965505	0.896271	0.8964
-40.1942	1.03979	0.863809	0.879224	1.0927	0.987023	0.829203	1.07099	0.835825	1.13929	1.07364	1.17773	0.948335	0.882947	0.964956	0.916632	1.02425	0.828157	1.00782	0.858389	1.42508	1.28227	1.19686	1.15114	1.29835	1.14615	1.17619	0.868517	0.883565	0.836635	0.835937	0.872408	1.02919	1.25331	0.997866	1.0133	1.1153	1.06509	0.956519	1.05887	0.832252	0.756032	0.913309	0.656005	1.18819	1.4956	1.25319	0.932032	0.93752	0.945063
-40.0971	1.04701	0.891529	0.932506	1.00075	0.937937	1.07731	1.13744	0.841753	0.825878	0.911164	0.867264	0.923124	0.796794	0.946697	0.88032	1.01787	0.773298	0.969319	0.99284	1.12256	1.26514	1.08994	1.13452	1.29248	1.09704	1.09476	0.837978	0.823407	0.811969	0.986566	0.982722	0.945849	1.1027	1.0197	1.44958	1.03146	1.04389	1.16579	0.938506	0.91711	0.821428	0.871112	0.551831	1.26158	1.30478	1.22932	0.927986	0.975296	1.00059
-40	0.984074	0.844856	0.978787	0.787865	1.0027	0.912028	0.719411	0.956396	0.928104	0.85675	0.831174	0.908705	1.0153	0.669892	0.889435	0.73097	0.778297	0.959694	0.951955	0.973526	1.07151	0.944957	1.08564	1.2184	0.852846	0.790012	0.794376	0.84512	0.94996	0.887309	0.890193	0.943524	0.988735	0.94547	1.2904	1.21373	0.98657	1.01236	0.880537	0.971475	0.774828	0.587668	0.554462	1.17098	1.2887	1.02437	0.881125	0.882131	0.931027
-39.9029	0.911494	0.824075	0.872198	1.11802	1.05225	0.938441	0.660625	0.935471	1.05036	0.98139	0.714738	0.924632	0.893387	0.813378	0.816013	0.80182	0.749958	0.964503	0.823401	0.901233	0.789647	0.97585	1.09725	1.34753	0.879958	0.886295	0.821884	0.907501	0.993349	0.892064	1.09124	1.17537	1.29333	0.992825	1.21624	1.13441	1.18902	0.927602	1.0038	0.849136	0.736987	0.954115	0.566968	1.23509	1.53683	1.17061	0.889227	0.963483	0.991429
-39.8058	0.902838	0.822039	0.846822	0.993495	0.912733	0.88964	0.655729	0.831864	0.951008	1.07104	0.824344	0.957333	0.951775	0.902837	1.01232	0.834533	0.82651	0.895892	0.886012	0.861592	0.917916	1.04995	1.11127	1.34982	0.85738	0.896105	0.788399	0.908917	0.911227	0.873993	0.964337	0.807156	1.09486	0.932064	1.27988	1.3012	1.12558	1.01757	1.03368	0.802696	0.801577	0.95548	0.512491	1.31369	1.62972	1.19842	0.936669	1.01368	0.977634
-39.7087	1.02203	0.857496	0.983873	0.969722	0.968264	0.880279	0.610009	0.982521	1.02341	0.92052	1.0084	0.898021	0.88249	0.88493	0.908976	0.836167	0.755687	0.848417	0.948438	0.814903	0.996111	1.21048	1.13013	1.09845	0.735421	0.732973	1.46932	0.961022	0.932158	1.00241	0.902251	1.11855	1.14079	0.862216	1.08671	1.24578	1.26163	0.91778	1.06967	0.857612	0.742796	0.744714	0.502787	1.27986	1.79758	1.25622	1.01115	0.964378	0.964792
-39.6117	0.91076	0.838676	0.926773	1.14672	0.90723	0.823535	0.984883	1.07025	0.998071	0.904762	1.08399	1.01775	0.901352	0.781743	0.903441	1.09606	0.815464	0.843214	1.01049	0.75412	0.974158	1.16806	1.15248	1.01853	0.794008	0.753507	1.47136	0.859371	0.908515	0.779479	0.748918	1.03975	1.18239	1.04031	1.08723	1.18561	0.988576	1.05569	0.979027	0.978425	0.811712	0.656626	0.556158	1.15255	1.4377	1.11264	0.83242	0.926042	1.00203
-39.5146	0.684263	0.792719	0.772598	1.06576	1.03785	0.994698	0.759413	0.692663	0.963612	1.02362	1.02296	1.09817	0.987337	0.933513	0.76752	0.765356	0.815185	0.868901	1.03589	0.868461	0.988711	1.02418	1.17657	1.02434	0.942868	0.865874	1.46539	0.819082	0.852234	1.02158	0.902821	0.944443	0.964671	1.00915	1.13207	1.07526	1.25012	1.05013	0.991917	0.89748	0.891419	0.899789	0.473638	1.08969	1.29832	1.14678	1.05044	0.935893	0.997855
-39.4175	0.782981	0.764004	0.804173	0.932121	1.02558	0.824351	0.691461	1.06411	1.14813	0.940088	0.96029	0.942103	1.00302	0.865832	0.838975	0.745259	0.815094	0.910032	1.04296	1.07036	1.02152	1.11367	1.02062	1.13456	0.86062	0.883803	1.45626	0.906191	0.71399	0.910411	0.88279	0.950332	1.11726	1.01905	1.08047	1.22847	1.00455	1.00312	1.11087	1.04257	0.922736	0.870641	0.492598	1.43526	1.07577	1.02586	0.942024	1.04083	1.00848
-39.3204	0.881725	0.733169	0.843368	1.04332	0.896942	0.989817	0.678576	0.929879	1.00175	0.983965	0.99871	1.05871	1.04708	1.01572	0.86362	0.993444	0.899872	1.00637	0.907424	1.14945	1.03772	1.15826	0.943556	1.26545	0.843698	0.930055	1.44966	1.00031	0.796124	0.86353	0.84428	0.95559	1.30423	0.977098	1.00001	1.25276	0.806075	0.995314	1.02896	0.884389	0.878368	0.876667	0.5543	1.21204	1.55163	0.934069	0.891476	0.934958	0.969829
-39.2233	0.980518	0.698095	0.897799	0.975174	1.00161	0.931359	0.755316	0.946498	1.00796	0.995659	1.08855	1.01164	0.926993	1.13101	0.814318	0.745145	0.828706	1.07988	0.902965	1.19041	1.07773	1.11303	1.02426	1.4377	0.957425	1.03295	1.47919	0.942295	0.732487	0.85671	0.944821	1.30085	1.1197	0.876427	1.44652	0.841663	0.917839	0.934209	1.08741	0.99052	0.931607	0.858994	0.524118	1.24487	1.07485	1.21212	0.851558	1.0015	1.11455
-39.1262	0.977144	0.777113	0.951714	0.8658	0.909636	0.838764	0.773702	1.07759	0.963376	0.898262	0.919037	0.978878	0.854076	0.987512	0.918541	0.739105	0.815906	1.10772	1.16066	1.15512	1.16535	0.989544	1.08823	1.27705	1.07267	1.13056	1.38073	0.878182	0.804003	0.90631	0.949274	0.836587	1.09515	1.01176	1.25975	1.23734	1.08841	1.05932	1.10606	0.878698	0.957735	0.930307	0.590626	1.20857	1.39979	1.0756	0.949569	0.917878	1.18798
-39.0291	0.922685	0.913177	1.00537	1.02857	0.927858	0.905127	0.952049	1.07612	1.12826	0.956396	0.918142	1.01233	1.04627	0.859652	0.891942	0.992692	0.812839	1.0607	1.28463	1.22667	1.08599	0.82693	1.14383	0.949931	1.18867	1.22553	1.42015	0.928621	0.761175	0.805565	0.830992	0.931194	1.05697	0.888588	1.06127	1.14169	1.04497	0.90555	1.02872	0.943735	0.949222	0.874636	0.637969	0.961487	1.70616	0.903786	0.813354	0.989494	0.932509
-38.932	0.860733	0.789044	0.953498	0.947721	0.926565	0.789767	0.881357	0.852681	1.14685	1.19909	0.825158	1.15919	0.985004	0.843658	0.946125	0.886034	0.916451	0.97625	1.34175	1.35163	0.923147	0.850366	0.981393	1.14984	1.2205	1.14676	1.32173	0.794729	0.778571	0.860321	1.03432	0.93075	1.24096	1.01795	1.46684	1.20357	1.09833	1.06768	0.94897	1.03422	0.950334	0.93861	0.528213	1.11121	1.5251	1.12169	0.855312	0.944858	1.04775
-38.835	0.852552	0.721136	0.914599	0.95446	0.933636	0.845048	0.91926	0.911327	0.850669	0.972042	1.12917	0.970769	0.947077	0.931896	0.911116	0.981692	0.850184	0.970474	1.17166	1.05616	0.904453	0.90381	0.88819	1.24086	1.22356	1.09192	1.32608	0.923965	0.955897	0.79324	0.760231	0.771454	1.13485	1.04065	1.27935	1.26636	1.01872	0.991521	1.07724	1.04123	0.953457	1.17647	0.629072	0.976052	1.2549	1.16089	0.86739	0.908916	0.853544
-38.7379	0.951912	0.765678	0.901647	1.0369	0.973096	0.824743	0.686862	1.0315	0.941692	0.940958	1.07872	1.07424	1.09831	0.910429	0.934762	0.92246	0.719141	0.95443	1.02823	0.86785	0.930668	1.01727	0.933444	1.11411	1.16906	1.08495	1.25342	0.857587	1.04744	0.876433	0.889143	0.916803	1.36156	0.958176	1.41792	0.997083	1.25408	1.59352	1.09463	0.913186	0.950429	0.831166	0.618392	1.29037	1.46489	1.01849	0.835504	1.03548	0.995307
-38.6408	0.902086	0.761534	1.01089	0.939851	0.904972	0.866697	0.492493	0.978645	0.868897	1.01162	0.885497	1.04692	0.883728	0.679632	1.05336	0.873938	0.799518	0.917849	0.938082	0.893867	1.0467	1.00239	0.968555	0.966903	1.1127	1.08066	1.28769	0.80601	0.871013	0.898403	0.972322	1.00319	1.45085	0.968205	1.45152	1.05469	1.34605	1.31853	1.1363	0.994763	0.892967	0.840996	0.537733	1.06099	1.32704	1.24078	1.04137	0.933532	1.00154
-38.5437	0.777666	0.733046	1.18123	0.924514	0.898257	0.885469	0.865163	0.843204	0.977585	1.07273	1.11062	1.13393	0.853839	0.981378	1.14638	0.903883	0.866553	0.935762	1.01318	0.868805	1.18866	0.923337	0.998595	0.809459	1.05541	1.07771	1.27532	0.944807	0.888598	0.895247	0.766848	1.18012	1.24846	1.01783	1.75417	0.995832	1.17694	1.12545	1.02701	0.808048	0.858006	0.912223	0.664518	1.14512	1.19068	0.990073	0.939622	0.933212	0.95631
-38.4466	0.813455	0.829136	0.962304	0.823505	0.974901	0.91592	1.14374	0.918293	0.841647	1.04909	0.849189	1.08737	0.885042	0.675673	1.17311	1.12526	0.85961	0.980924	1.17091	0.818204	1.34357	0.97199	0.944853	1.0628	1.0292	1.05355	1.30873	0.868895	0.759631	0.896179	0.99184	0.829728	1.2714	0.906211	1.41422	0.79566	1.08616	1.00333	1.17722	0.795237	0.907113	0.986063	0.628659	1.07534	1.29617	1.35218	1.25646	0.97667	0.904938
-38.3495	0.868011	0.855699	0.837969	0.960912	1.02514	0.854512	0.797965	0.846626	0.97865	0.96697	0.976299	1.21472	1.08248	1.07983	1.29619	0.969248	0.734534	0.935057	0.989604	0.874824	0.923935	1.04841	0.979559	1.16172	1.03818	1.0487	1.30536	0.838732	0.979176	0.996361	0.965653	1.05948	1.19646	0.90405	1.26287	0.876857	1.29574	1.23523	1.07132	0.869086	0.917632	0.80427	0.597893	1.37313	1.45425	1.10503	0.984595	0.906848	1.08039
-38.2524	0.960099	0.743208	0.902814	0.822314	0.94321	0.921038	0.788105	0.852748	0.976803	0.942865	0.925998	1.13695	1.12614	0.771017	1.42594	0.769606	0.848153	0.937846	0.870872	0.980199	0.743745	1.18035	1.19116	0.951779	1.11753	1.08247	1.41256	0.928419	0.907089	1.11747	0.943067	0.992051	1.20414	1.05659	1.13256	0.870049	0.948311	1.09557	1.05127	0.99855	0.841753	0.906362	0.501514	1.22837	1.18739	1.08882	1.0032	0.98505	0.889854
-38.1553	0.970867	0.768512	0.883994	0.934258	0.875938	0.896336	0.713854	0.931496	1.02324	0.983575	0.953513	1.26736	1.14871	0.949183	1.37053	0.945228	1.03967	1.03795	0.877287	1.18308	1.04244	1.15979	1.15356	0.956555	1.05065	1.00849	1.39023	0.835214	0.883051	0.922447	0.99153	1.10682	1.13582	0.840158	1.22414	0.755171	0.981588	0.934261	1.06909	0.932774	0.83795	0.982233	0.513159	1.10956	1.23658	1.07144	0.954204	0.960604	0.974134
-38.0583	0.940976	0.862713	0.823342	1.02601	0.901617	0.920031	0.778198	0.969336	0.798157	1.14292	0.915647	1.24999	0.887732	0.883503	1.44726	0.749357	1.05704	0.98081	0.92065	1.2425	1.12001	1.06298	0.991366	1.06869	0.91065	0.88064	1.33879	0.938357	0.995629	1.11092	1.12399	1.15759	1.12058	1.02374	1.43499	0.96937	1.03156	0.989319	1.17265	0.925393	0.742221	0.981774	0.635948	1.34895	1.51801	0.832131	0.982635	0.927196	0.988578
-37.9612	1.0239	0.821056	0.860029	0.986813	0.928281	0.801936	0.717278	0.927857	1.07613	1.10084	1.0071	1.28061	0.956449	0.911281	1.31179	1.04675	0.903924	0.845054	0.982486	1.23019	1.08702	1.06718	0.958085	1.14407	0.939088	0.892064	1.47256	0.938283	1.04627	0.899153	0.981325	0.902164	1.17463	0.945502	1.20188	0.917881	1.05873	1.03378	0.964913	0.857299	0.803851	0.821314	0.462495	1.02121	1.52524	1.03717	1.12374	0.982844	1.05625
-37.8641	1.03427	0.794068	0.904693	1.0229	0.989966	0.859527	0.731727	0.87551	0.909431	0.992451	0.802933	1.31892	0.969782	0.716181	1.24879	1.09649	1.00583	0.873516	1.16683	1.03555	1.26344	1.04155	0.922815	1.1696	0.994408	0.954994	1.44549	0.950138	0.995762	0.981511	0.987998	1.42621	1.09541	0.991966	1.00957	0.72747	1.02037	1.25686	0.997289	0.944186	0.887426	0.936935	0.539688	1.23217	1.45179	0.923613	0.822765	0.932923	1.11306
-37.767	0.899539	0.796419	0.965311	0.864923	0.950662	0.832286	0.858316	1.00084	0.923337	0.863477	0.849022	1.2129	0.933483	1.00785	1.42573	1.0241	1.01483	0.93505	1.26607	0.958015	1.24957	0.956291	0.883563	1.09542	1.10349	1.12094	1.3535	0.92574	1.09168	0.946936	0.947114	1.02975	1.21247	1.05885	1.11142	0.915619	0.969889	1.12281	1.00943	0.841277	0.876532	0.981015	0.499816	1.24509	1.21915	0.96766	0.937038	0.877348	1.10364
-37.6699	0.901327	0.773473	1.01926	0.945892	1.0002	0.927131	0.487094	0.67161	1.19264	0.854901	0.866318	1.27183	0.998605	0.914591	1.33832	1.29511	0.955434	1.06273	1.1951	1.11471	0.855103	0.843486	0.824583	0.906052	1.24676	1.26408	1.32713	0.961613	0.868653	0.898955	0.774844	0.991071	1.14215	0.869756	1.19252	0.996682	1.00053	1.101	0.971938	0.778383	0.756648	0.787857	0.509973	1.21998	1.44365	1.11036	0.945997	0.967327	0.988946
-37.5728	0.971375	0.737879	1.06988	0.943533	0.874545	0.855117	0.527529	0.764181	0.885345	0.897404	0.870022	1.28517	1.14925	0.930144	1.15848	1.04869	1.05243	1.03953	1.10214	1.01681	0.91899	0.716911	0.75574	0.659081	1.40712	1.39581	1.27634	0.940896	0.849762	0.934425	0.96279	0.884491	1.04711	0.880129	1.28203	0.943486	1.13259	1.04379	0.928477	0.755892	0.865433	0.70155	0.452408	1.08656	1.23405	1.02128	1.13859	0.966498	0.991132
-37.4757	0.942224	0.74751	0.919744	1.04442	0.942274	0.881869	0.73919	0.81437	0.842982	1.01084	0.841981	1.15096	1.16586	1.14479	1.31153	1.25922	0.960825	0.940889	0.998199	0.791611	1.21205	0.813047	0.997085	0.992357	1.28382	1.19698	1.36685	1.01145	0.806272	0.838788	0.915733	1.15916	1.06546	1.13435	1.27425	0.896341	0.932991	1.18303	0.974755	0.939316	0.742921	1.00852	0.546257	1.30549	1.03833	1.08024	1.13447	1.0815	0.938424
-37.3786	0.938643	0.773294	0.7824	0.821326	0.847086	0.846644	0.550663	0.902615	0.821152	0.953	0.94127	1.07598	1.12034	1.00558	1.31004	0.980693	1.29662	0.976164	1.1009	0.881103	1.02905	0.867816	1.11469	1.16814	1.25029	1.12192	1.33174	0.959312	0.857075	0.973287	1.00605	0.810249	1.03205	0.950717	1.21709	0.90892	0.820902	1.01744	0.979622	1.02958	0.809749	0.847829	0.48001	1.25368	1.26955	0.890496	0.827959	1.11007	1.0731
-37.2816	0.986203	0.831385	0.670644	0.972085	0.925597	0.80284	0.958724	0.84441	0.946592	0.775976	0.825483	1.11575	1.06528	0.907398	1.34735	0.750126	1.00379	0.958573	1.1841	0.950006	0.994016	0.839852	0.984799	1.02894	1.39627	1.29442	1.27334	0.949996	1.0937	0.972735	1.00627	1.02173	1.10548	0.995024	1.26435	0.892575	0.978163	0.996359	1.01574	0.879638	0.829534	0.793006	0.517428	1.17759	1.25704	1.00688	0.909268	1.09933	0.911401
-37.1845	0.891546	0.820635	0.724539	1.08282	0.890857	0.752558	0.902552	0.930241	1.08725	1.00689	0.786863	1.14766	1.09008	1.21413	1.12354	1.01906	1.08259	0.835252	1.22833	0.977731	1.25492	0.78505	0.985269	1.03166	1.32987	1.22069	1.41824	0.932641	0.9251	0.742882	0.931078	0.841606	1.1144	0.895236	1.17771	0.668056	0.951078	1.1226	1.02299	0.948287	0.798408	0.811903	0.526963	1.27024	1.27486	0.911625	1.25179	0.997439	1.2026
-37.0874	0.72578	0.775464	0.86126	1.07631	0.909505	0.925105	0.90383	0.976046	1.06494	0.866459	0.872825	1.18773	1.13189	1.16727	1.10867	1.20651	1.06451	0.882618	1.10751	0.845335	1.25515	0.71683	1.05092	1.10534	1.15728	1.02385	1.39389	0.88136	0.747396	0.817631	0.87531	1.02138	0.99673	1.01819	1.1455	1.066	0.695217	1.11548	0.918375	1.05299	0.829165	0.873325	0.552463	1.30269	1.30623	0.857423	0.925691	1.06677	1.02264
-36.9903	0.698086	0.704832	1.07613	0.895801	0.980287	0.894804	0.616504	0.889861	0.815388	0.859175	0.889585	1.13401	0.960218	0.938429	1.09269	0.936824	1.39449	1.01533	0.904166	0.632878	1.12504	0.774574	1.05003	1.02095	0.99188	0.955097	1.39148	0.87893	0.740329	0.822729	0.879541	0.960924	1.04162	1.01659	1.08647	1.10296	1.13382	0.789657	0.991242	0.829585	0.747495	0.811624	0.540692	1.20511	1.42995	0.92511	0.964496	1.00852	0.998195
-36.8932	0.711679	0.692392	1.1046	1.01498	0.921666	0.878183	0.976746	0.880453	1.05664	0.960287	0.970397	1.08364	0.964011	1.14192	1.1268	1.14345	1.17228	0.876409	1.13003	1.03673	1.06797	0.832314	1.07226	1.01733	0.903176	0.932442	1.34198	1.02069	0.902472	0.971973	0.9207	0.963948	1.03833	0.912102	0.867897	0.737415	1.1466	0.962838	0.916007	0.809353	0.835821	0.902452	0.4747	1.07462	1.12572	0.835953	1.06983	0.997871	1.03786
-36.7961	0.807846	0.796336	0.760302	0.92469	0.913618	1.09394	0.782593	0.947753	0.866807	0.984769	0.853647	1.26105	1.09526	0.884002	1.12995	1.02023	1.10374	0.832606	1.27662	1.23531	1.03812	0.890042	1.14069	1.17524	0.967852	1.00199	1.28207	0.880348	0.895981	0.912906	1.09598	1.05278	0.933561	1.05361	1.18861	0.892067	1.09371	1.077	1.00259	0.817431	0.72909	0.620055	0.512718	1.02781	1.38684	0.945431	1.03911	1.02872	1.08087
-36.699	0.932605	0.834932	0.736312	0.96032	0.991603	0.896599	0.859389	0.842654	0.984072	1.01423	0.914482	1.26649	1.04469	0.923846	1.18437	1.1743	1.34699	0.979034	1.26468	1.02333	1.06273	1.03672	1.08803	1.12164	1.02597	1.02991	1.20574	1.01027	1.03909	1.16956	1.05376	1.0264	1.08442	0.888002	1.32906	0.894816	1.219	1.05699	0.999203	0.811598	0.850659	0.868986	0.508476	1.34282	1.32424	1.10306	0.906625	0.994566	0.972736
-36.6019	1.07166	0.840854	0.872478	0.901675	1.02387	0.801612	0.826919	0.86098	1.04434	1.06166	0.801944	1.20884	0.874704	0.842879	1.08733	1.00469	1.14913	0.923724	1.2435	1.02491	1.03605	1.22787	0.97481	0.962285	1.08081	1.03701	1.23345	0.841302	1.08809	0.913179	1.07089	0.808578	1.19625	1.06134	1.17778	1.11149	1.09324	0.904088	1.02269	0.917057	0.776546	0.976142	0.610977	1.14141	1.10983	0.909855	1.11384	1.07061	1.12911
-36.5049	1.17108	0.742237	0.916411	1.06878	0.920786	0.902877	1.1774	0.897081	1.03671	0.90961	0.998044	1.09242	1.07718	0.921802	1.0291	1.2316	0.963524	0.767546	1.2177	1.13326	0.983726	1.05386	0.903598	0.985263	0.980573	0.96752	1.18123	0.923541	0.887285	1.01478	1.00184	0.936281	1.15023	0.926048	1.10396	1.13559	1.26438	1.08341	0.905483	0.900772	0.821352	1.1029	0.509701	1.18154	1.30995	0.84174	1.18835	1.03423	0.965358
-36.4078	1.20686	0.702929	0.996558	0.931098	0.982014	0.936779	0.879224	1.1416	1.1113	0.959783	1.10164	1.15739	1.09316	1.04329	1.17664	1.15535	1.42066	0.862679	1.02726	0.940142	0.954204	0.92117	0.932316	0.993716	0.929444	0.928434	1.24187	0.774131	0.945449	0.818542	1.27164	1.01695	1.07457	1.01813	0.845636	1.16254	0.898648	1.05454	0.977689	0.825168	0.800909	0.858779	0.518674	1.27421	1.14352	1.00917	1.26616	1.0482	1.0761
-36.3107	1.11536	0.782242	1.14913	0.943182	1.04138	0.988377	0.736336	1.12582	0.976394	0.812089	0.979618	1.1344	0.932008	1.03695	0.909374	1.09812	1.29886	0.959039	0.848298	0.842806	0.878654	0.871122	1.16089	0.973118	0.976539	0.950147	1.23821	0.806904	0.886836	1.01961	1.09187	0.850842	1.0067	0.863712	1.25094	0.869555	1.01556	0.92543	1.04205	0.899985	0.753093	0.876926	0.528814	1.17291	1.31482	1.00535	1.23667	0.94014	0.982984
-36.2136	1.10414	0.746401	1.04834	1.17813	0.955521	0.884419	0.934997	1.05386	1.06544	0.935125	0.96262	1.02694	1.0059	0.916343	1.03923	1.49588	1.19119	1.05785	0.692264	0.937032	0.71105	0.858233	1.15187	0.948984	0.91069	0.944144	1.1961	0.944833	1.00622	0.913605	0.905787	1.07805	0.919125	0.958454	1.06739	0.985798	1.05311	1.0958	1.13758	0.781602	0.817685	0.860491	0.607629	1.16116	1.10991	0.865089	1.02631	1.14907	1.1234
-36.1165	1.13306	0.652984	0.820868	1.09586	0.972153	0.934659	0.728474	1.03082	1.0786	0.940195	0.875443	1.11646	1.08853	1.17168	1.00284	1.11099	1.3614	0.95394	0.886344	0.991791	0.820097	0.863923	1.02404	0.923082	0.788368	0.924283	1.12757	0.912888	0.995303	1.05199	0.958511	0.81122	1.05221	0.924446	1.31066	0.93528	1.1783	0.933301	0.986787	0.861237	0.819644	0.801615	0.616607	1.10051	1.36795	0.891238	1.07186	1.01606	1.0962
-36.0194	1.00226	0.747831	0.715283	0.894388	1.07373	0.891867	0.908018	1.1093	1.10203	0.804005	0.96748	1.15898	1.05077	0.914401	0.865037	1.29594	1.38912	0.748668	1.25548	1.02682	1.06747	0.871464	0.88787	0.839626	1.04348	1.0806	1.07903	1.15366	0.768921	0.762789	0.812132	0.978196	1.0468	0.902484	1.06047	1.24637	0.801645	0.946643	1.01552	0.799228	0.766571	0.728654	0.572647	1.26983	1.27238	0.975657	1.28439	1.03688	0.926472
-35.9223	0.947364	0.806443	0.670749	1.05831	1.07652	0.919505	0.924304	0.84804	0.906326	1.00592	1.01666	1.12899	1.05967	1.25778	0.96133	1.38351	1.29635	0.835659	1.1204	0.885369	0.84166	0.860067	0.793166	0.795976	1.1752	1.15127	1.06867	0.871717	0.811876	0.827332	0.981037	0.831739	1.11783	1.10778	1.05756	0.888536	1.05162	1.00641	0.93762	0.914725	0.79733	0.714281	0.474872	1.09987	1.12157	1.12226	0.909174	1.04387	0.990446
-35.8252	1.0443	0.792584	0.748316	1.13666	0.928827	0.99201	0.88339	0.932527	0.89509	0.917465	1.20734	1.33286	1.1616	1.15495	1.01312	1.32022	1.33147	0.881031	0.999742	0.880023	0.679779	0.810794	0.78139	0.831938	1.06013	1.05064	1.09304	0.921429	0.871468	0.781053	0.902508	1.00354	1.085	0.940671	1.21944	0.911771	1.09271	0.980035	1.00428	0.914443	0.723923	0.735821	0.500941	1.16201	1.24508	1.12884	1.0615	1.00167	1.07463
-35.7282	1.09442	0.816949	0.835171	0.912971	0.987863	0.866072	0.771374	1.01738	1.04401	0.874891	0.908167	1.21932	1.19891	1.00276	0.898836	1.43698	1.43096	0.843164	0.907953	1.14687	0.645758	0.761496	0.831097	0.79102	0.907943	0.903315	1.03616	0.816985	0.788613	0.739259	0.85308	0.754847	1.0527	1.01463	1.0263	0.856586	1.004	0.918794	1.01737	0.700411	0.838217	0.740203	0.462414	1.06449	1.03608	0.897579	0.907008	0.977264	0.879893
-35.6311	1.12113	0.860426	0.92667	0.914307	0.933036	1.01211	0.946582	0.90085	1.03986	0.934489	0.968847	1.20463	1.10068	1.13	0.946554	1.09868	1.30569	0.953791	1.05726	1.14352	0.757152	0.712185	0.911545	0.711661	0.737198	0.732636	1.01543	0.904289	0.836218	0.941552	0.994171	1.04893	0.920728	1.04948	1.28146	0.835681	0.897204	0.92982	1.02963	0.854959	0.828789	0.736292	0.552201	0.894914	1.01873	1.0314	0.878737	1.07839	0.997484
-35.534	1.19424	0.817281	0.954712	0.867945	0.960163	1.05442	0.706241	0.981824	0.807188	0.794962	0.887073	1.19429	0.946717	0.738633	0.866066	1.19468	1.3604	1.13867	1.32712	1.00505	0.941255	0.658547	0.828252	0.794195	0.814007	0.828273	1.07113	0.959616	0.937506	0.889224	0.858572	0.927701	1.0242	0.935021	0.977624	0.938297	0.966189	0.836308	0.97092	0.810262	0.867157	0.616604	0.558281	1.09258	1.08768	0.84095	1.04069	1.06687	1.09091
-35.4369	1.30998	0.80259	0.947826	1.17451	0.869259	0.920255	0.919214	0.854397	1.08475	0.907805	0.98242	1.12307	0.984621	1.11031	0.819036	1.21014	1.47271	1.09506	1.22218	0.961447	0.898434	0.599432	0.799298	0.839519	0.90533	0.935183	1.08031	0.884251	0.970982	1.09583	0.956702	1.1116	0.911215	0.875892	1.04267	0.895324	1.08947	0.942292	1.02502	1.05483	0.836049	0.754676	0.536137	0.956478	0.985926	1.01261	0.867111	1.02369	0.99642
-35.3398	1.51098	0.844807	0.871084	0.980277	1.02545	0.933205	0.901388	0.750103	1.1509	1.00227	0.887396	1.2277	0.979767	0.815084	0.8057	1.22087	1.24678	1.04308	1.15544	0.915957	0.881673	0.529363	0.879023	0.810426	1.02568	1.06464	1.05711	0.821749	1.06102	1.16132	0.886571	0.932174	0.972387	0.980993	1.02497	1.02383	0.968321	0.92279	0.986178	0.91021	0.782865	0.701969	0.480398	0.899508	1.05562	1.0071	0.894812	0.945684	1.05051
-35.2427	1.39933	0.889127	0.82945	1.06665	0.940949	0.823101	0.722995	0.97843	1.18744	0.956625	1.16003	1.09769	1.14759	1.27362	0.854712	0.911901	1.16211	0.974388	1.16511	0.866697	0.917029	0.610661	0.892305	0.830603	0.977933	1.01437	1.05027	0.995381	0.951311	0.996454	1.03149	0.924207	0.983017	0.966048	1.11276	0.995368	0.892667	1.03463	0.921653	0.844008	0.857701	0.810533	0.548799	1.03348	1.1316	0.951572	0.903495	1.03514	0.946684
-35.1456	1.13136	0.9345	0.805369	0.903566	1.02631	0.908263	1.11716	0.67992	1.16302	0.996134	1.23002	1.16403	1.17785	1.40161	0.795963	1.31849	1.29528	0.847633	1.11529	0.861479	1.07943	0.767642	0.872367	0.875415	0.84614	0.874224	1.01682	0.813838	1.04269	1.27978	1.00133	0.951201	1.08296	0.924819	1.18509	1.20479	1.03422	0.916696	0.935616	0.987653	0.775819	0.755651	0.562883	0.910296	1.04866	0.900148	0.899972	0.94562	1.01138
-35.0485	1.18182	0.863868	0.782708	1.06258	0.983207	0.95686	1.02527	1.07128	0.913997	0.999362	1.06299	1.17237	1.08533	1.36758	0.763808	0.944653	1.42927	0.69185	1.03574	0.878281	1.30536	0.691417	0.892906	0.955984	0.89467	0.915053	0.994918	0.985662	0.879395	1.15989	1.13306	0.944393	0.961475	0.992926	0.781477	1.2024	0.865981	1.07536	0.989373	0.92537	0.738832	1.02739	0.714188	0.757563	1.00364	0.988105	0.999337	0.958916	0.896047
-34.9515	1.20406	0.828839	0.764796	1.11226	0.944585	0.907473	0.822891	1.09144	0.995696	1.14146	1.07801	1.22604	1.05395	1.34162	0.802495	1.08827	1.23429	0.72239	1.13212	0.893147	1.23744	0.650192	0.922493	0.976438	0.91702	0.931612	1.01927	0.886516	0.994993	1.10723	1.13018	1.11359	0.934496	0.984372	0.970341	1.18154	1.03483	0.940665	0.895758	0.82634	0.798507	1.00974	0.566724	1.04471	0.894999	1.06873	1.06741	0.960738	1.00301
-34.8544	1.16988	0.865014	0.756381	0.827566	0.984869	0.862042	0.840387	1.03132	1.04427	0.943508	0.990179	1.13595	0.949241	1.09725	0.720791	1.04529	1.12912	0.724835	1.13162	0.918359	1.08983	0.678968	0.970177	0.876663	0.887006	0.899634	1.03531	1.01097	1.03425	1.03087	1.06159	1.34288	1.04663	0.882439	1.04045	0.985906	1.10396	0.869978	0.909583	0.885085	0.77367	0.975986	0.618118	0.792354	0.819463	1.0371	0.949486	0.865818	0.927286
-34.7573	1.2056	0.780381	0.815971	0.995803	0.963667	1.07067	1.0251	1.14372	0.900753	1.07599	1.18813	1.18479	1.1078	1.30487	0.74658	1.03523	0.982973	0.67109	0.937361	0.964263	0.782872	0.701052	0.823921	0.817208	0.96592	0.97205	1.0642	0.918684	1.08967	1.04199	0.980999	1.03792	1.01838	0.829809	0.902779	1.11606	0.827464	0.994581	0.86666	0.854525	0.758954	0.853876	0.569349	0.817482	0.890457	1.14549	0.902451	0.946826	0.940443
-34.6602	1.27627	0.635344	0.909563	1.00369	1.03396	0.970113	0.895978	1.10792	1.14961	1.00344	1.1448	1.2562	1.24506	1.20008	0.928064	0.970344	1.27909	0.688269	0.917391	0.874727	0.755609	0.71979	0.580696	0.777915	1.0993	1.09666	1.03045	0.95169	0.838098	1.0893	0.894823	0.81238	1.0457	0.99626	0.912596	0.998803	0.966779	0.865923	0.980323	1.02879	0.783081	0.805878	0.574795	0.858652	0.928352	0.985205	0.823357	0.986832	0.977671
-34.5631	1.38332	0.798841	1.076	1.02733	0.987771	0.968028	0.68651	1.06177	0.98726	0.9941	0.82698	1.17739	0.849234	0.872233	0.986018	1.05179	1.12649	0.740909	0.984564	0.717473	0.868195	0.838975	0.904002	0.769773	1.02285	0.980954	1.09591	0.993897	0.7372	1.19379	1.09224	1.07839	1.03621	1.06712	1.05552	1.22863	1.05653	0.930023	0.94032	1.15172	0.789889	0.752542	0.6164	0.936534	0.978184	1.03985	1.05436	1.0043	1.07095
-34.466	1.40754	0.9005	1.11858	1.01344	1.07567	0.887318	0.834953	0.839672	1.08215	0.853096	1.32606	1.21904	1.03925	1.07703	1.20804	0.953691	1.20347	0.7783	1.10502	0.916351	0.853376	0.870245	1.08527	0.773184	0.956207	0.906397	1.0262	0.870692	1.00784	1.16474	1.15941	1.21573	0.895531	0.90327	0.847013	1.22043	0.966436	0.938658	0.9456	0.752402	0.808263	0.931049	0.616794	0.869583	0.923205	0.985496	0.947703	0.932807	0.94822
-34.3689	1.26607	0.878483	0.913461	0.966779	1.0463	1.10366	0.754117	0.827448	0.911739	0.939571	1.00923	1.25438	1.1371	1.11537	1.41026	1.26076	1.13486	0.846435	1.20177	1.04179	0.888043	0.725688	0.982463	0.7997	0.909173	0.914144	1.00629	0.888253	1.00098	1.1344	1.03761	1.35725	0.905178	0.816911	0.857479	1.08136	0.929823	0.884017	0.773937	0.880307	0.853539	0.688989	0.60302	0.984032	0.987468	0.919513	0.917046	0.935796	1.13949
-34.2718	1.25511	0.826575	0.961055	1.07312	0.948014	0.920544	0.676638	0.762504	0.83584	0.917272	1.07761	1.2781	1.10141	1.09494	1.26361	1.22872	1.07169	0.97606	1.25111	1.02034	1.02168	0.667149	0.93419	0.789189	0.927192	0.912084	1.04615	0.89737	1.12523	1.13076	1.16439	1.03283	0.906205	0.930265	0.812605	1.00846	0.987911	1.0927	1.0036	0.912939	0.830632	0.787205	0.691504	1.11871	1.15729	1.21987	1.12228	0.943795	0.914935
-34.1748	1.3094	0.75972	1.13501	1.06969	0.936111	0.937305	0.971998	1.12675	0.946927	0.945769	0.892467	1.2328	1.12356	0.928923	1.30894	1.08523	1.19226	0.974927	1.47908	1.01134	1.12217	0.651618	0.913183	0.760166	0.977737	0.905121	0.980714	0.82746	1.03329	1.22494	1.14013	1.50641	0.900136	1.06444	0.83334	0.934988	1.22708	0.920739	0.931952	0.956166	0.884706	0.870657	0.587837	1.10489	0.95045	1.02072	0.844731	0.918198	1.05142
-34.0777	1.32199	0.79353	0.97762	0.993088	0.953747	0.922689	0.683507	0.76421	0.920283	0.862476	0.992964	1.23842	1.00892	1.34683	1.45527	1.39765	1.00593	0.908414	1.79636	1.00855	1.20607	0.626612	0.853471	0.83842	0.816144	0.729535	1.01809	0.845518	0.948274	1.16191	1.29593	1.42054	0.882994	0.803763	0.86564	0.960999	0.949936	0.937243	0.900973	0.864282	0.925291	0.91515	0.627692	0.960559	1.12732	1.01646	1.1035	0.873193	0.999484
-33.9806	1.31546	0.870018	0.887251	1.14332	1.0186	0.866112	0.737923	1.06712	1.12183	1.1961	0.913966	1.24792	1.27338	1.128	1.41419	1.36999	1.21338	0.851097	1.41248	0.789864	1.03621	0.637012	0.853429	0.93236	0.785406	0.709706	0.970778	0.966231	1.12362	1.27628	1.1132	1.50842	0.885831	0.806637	1.12985	1.02198	0.825801	0.842921	0.983945	0.904181	0.952187	0.614771	0.452886	1.0448	1.01443	1.11275	0.86003	0.926115	0.934766
-33.8835	1.2707	1.03186	0.930919	1.04249	0.964949	0.828482	0.881621	0.87959	0.921758	0.929239	1.00143	1.192	0.970854	0.931453	1.51929	0.96577	1.24917	0.796894	1.16328	0.675666	0.969051	0.718225	0.972727	1.05767	1.01638	1.00139	0.998654	1.04504	1.15369	1.31742	0.992357	1.39618	0.930913	1.00688	1.12375	0.715576	0.9417	0.911488	0.880608	1.10865	0.874495	0.792429	0.558743	0.883606	1.23405	0.993176	1.07983	0.961841	0.989716
-33.7864	1.24831	1.12504	0.900809	1.03655	1.04837	0.884022	0.873837	0.980108	0.875534	1.00321	0.947051	1.15822	1.10211	1.30154	1.4127	1.37115	1.18811	0.748924	1.18348	0.77045	1.1073	0.705998	0.947797	1.02949	0.949335	0.93673	1.02572	0.913612	1.14847	1.09179	1.2117	1.36902	1.06959	0.690654	0.75508	1.09055	1.06841	0.864901	0.888233	0.998671	0.814122	0.772726	0.546005	0.892321	0.970802	1.0152	0.959419	0.976721	0.983281
-33.6893	1.23712	1.18388	0.83381	1.03431	0.938062	0.952126	1.08365	0.892608	1.06252	1.02491	0.984093	1.10101	1.12236	1.04991	1.4118	0.777414	1.21283	0.811282	1.20681	0.90103	1.02143	0.64705	0.850754	0.924556	0.733277	0.693891	0.96408	0.917901	1.08837	1.27253	1.13637	1.19517	0.855132	0.906079	0.921499	1.02456	1.22919	0.963922	0.926054	0.905642	0.863259	0.795263	0.565334	0.922949	0.925465	1.056	0.858129	0.896107	0.94511
-33.5922	1.09542	1.32365	1.04583	0.997914	0.951117	0.891664	0.730094	0.93087	1.13695	1.10708	0.890785	1.17208	1.20067	1.47737	1.39209	0.766355	1.10776	0.928805	1.23172	1.04951	0.8235	0.704149	0.815107	1.11921	0.844342	0.849453	0.988467	1.03197	1.16293	1.32663	1.36729	1.30092	0.949872	0.872555	1.00075	1.02184	0.951754	0.814655	1.05097	0.858015	0.932527	1.07952	0.530597	0.951741	1.10261	1.1198	0.862836	0.995206	1.11827
-33.4951	1.04602	1.35539	1.13346	1.07982	0.940279	0.821081	0.763203	0.895786	0.90913	1.0528	1.07244	1.20052	1.01959	1.10144	1.45092	0.819014	1.14135	0.883798	1.13377	1.25724	0.953633	0.689832	0.828938	1.16118	0.974364	0.983612	0.954403	0.893728	1.06081	1.38373	1.25527	1.35036	1.02883	0.898525	0.985114	0.989926	1.00984	0.945274	0.978904	0.83307	0.947309	0.858215	0.557026	0.92001	0.926068	1.02226	0.918342	0.929603	0.971975
-33.3981	1.18126	1.1711	0.97229	1.06196	0.961341	0.811984	0.687593	0.840938	0.994613	0.824065	1.16337	1.14399	1.01045	1.03237	1.50445	0.95375	1.03007	0.871471	1.08538	1.35381	1.00145	0.532681	0.941725	0.897786	1.1423	1.07497	0.999117	0.878021	1.17755	1.23326	1.16075	0.949523	0.847901	0.883508	0.981826	1.0103	0.926912	0.892403	1.06154	0.931075	0.894125	0.751963	0.654868	0.993136	0.898128	1.0391	0.954447	0.94201	1.05092
-33.301	1.20463	1.13671	0.94017	1.13501	1.01096	0.970499	0.539376	1.1054	0.918443	1.04584	1.07248	1.09979	1.04179	1.10139	1.40919	0.905035	0.963409	0.924506	1.13614	1.22803	0.884638	0.624902	0.877609	0.909	1.05718	0.999815	0.983431	0.799614	1.18752	1.2867	1.31864	1.27229	0.902999	0.838754	0.799732	0.993888	0.930612	0.988941	1.07548	0.957423	0.843664	0.822044	0.564858	0.939341	0.925849	0.950552	1.00924	0.893843	0.973716
-33.2039	1.17206	1.17727	0.972574	0.971135	0.926304	0.944458	0.848661	1.16315	0.918159	1.08573	0.960213	1.21223	1.03668	1.37847	1.31733	0.928709	1.07929	0.954175	1.12042	1.13241	0.874821	0.841808	0.725043	1.05752	0.845535	0.841408	1.0036	0.957943	0.993669	1.23223	1.40405	0.942118	0.898932	0.964246	0.838734	1.12096	1.08671	0.966245	1.00626	0.916576	0.823283	0.675299	0.537809	1.07248	0.898164	0.940638	0.918599	1.01979	1.15717
-33.1068	1.27706	1.19504	1.44365	0.942156	0.87345	0.904199	0.801708	1.00904	0.926762	1.04059	0.937978	1.13355	1.08667	1.40085	1.35472	1.08191	1.18443	0.972162	1.07147	1.05187	0.918503	0.9452	0.747398	1.04644	0.948768	0.980582	0.946367	0.843859	1.06721	1.16766	1.49001	1.22671	0.960359	1.00008	0.981606	1.15236	0.950879	0.91111	0.867851	0.86728	0.847759	1.0267	0.581539	0.917816	1.1424	1.09676	0.891324	0.975375	0.909446
-33.0097	1.40956	1.21611	1.58755	0.977781	0.914573	0.887039	0.692147	0.828341	0.943285	1.03018	1.19283	1.19386	1.09636	1.14476	1.30695	1.36027	0.984303	0.9749	1.15435	1.00061	0.955925	1.03021	0.766552	1.02853	1.00574	1.06317	1.03086	0.812095	1.18886	1.22605	1.40897	1.15535	0.870047	1.00487	1.13316	1.07221	1.04212	0.871417	1.04368	0.878664	0.835827	0.787221	0.613036	1.07965	0.916333	0.929854	0.820853	0.985327	0.918695
-32.9126	1.59708	1.24376	1.07709	0.800231	0.914253	0.934047	0.851195	0.938423	1.10913	0.934268	1.14059	1.06721	0.907234	1.49389	1.34399	1.56475	1.09581	0.962294	1.16218	0.962445	0.983962	1.07845	0.7793	0.996976	0.97019	1.03256	1.04021	0.955058	1.13186	1.28152	1.16987	1.15767	0.875299	0.90006	0.777286	0.77226	1.15001	0.76251	1.00159	0.952631	0.81957	0.867422	0.598376	0.90115	0.917065	1.09933	0.962747	0.964232	0.94061
-32.8155	1.52894	1.18972	1.04614	1.14222	0.956674	0.90871	0.712302	1.01149	1.00553	0.870671	0.859995	1.12434	0.816437	1.01944	1.24931	1.01785	1.08163	0.919	1.01991	0.950471	0.993233	1.14514	0.874441	1.02573	1.04969	1.0473	1.06686	0.790746	1.16798	1.13433	1.22095	1.12164	1.01774	0.926079	1.00875	1.37962	0.992029	0.806004	1.00612	1.06309	0.768689	0.82882	0.504468	1.00277	0.937392	1.03717	0.949312	1.01509	0.941424
-32.7184	1.33297	1.09484	1.25493	0.999303	0.852034	1.01847	0.74242	0.761452	1.06182	1.01747	1.13705	1.07939	1.01558	0.9807	1.34591	0.990076	1.09181	0.877264	1.05095	0.990123	0.90933	1.22107	1.01078	1.08465	1.18672	1.08469	1.04402	0.951723	0.8921	1.26642	1.20226	1.01818	1.06893	0.981088	0.813728	1.1218	1.18811	0.875215	1.16938	0.962352	0.781291	0.739006	0.418287	0.995444	1.10586	0.960514	0.823485	0.91435	1.06947
-32.6214	1.16158	1.26171	1.12657	0.958763	1.01794	0.94384	0.765268	0.929937	0.98825	1.15345	0.957507	1.16871	0.996962	1.09366	1.25887	1.0901	1.0629	0.836306	1.16864	1.05559	0.778842	0.9649	0.981756	1.11929	1.04492	0.988611	1.01192	1.0573	0.922997	1.15362	1.19667	1.09141	1.04181	0.995172	0.973236	0.873142	0.913731	0.909499	1.03195	0.92523	0.831768	0.903394	0.501212	0.806399	1.01223	0.96506	0.816079	0.924854	1.18611
-32.5243	1.11403	1.36254	1.01424	1.05075	0.964461	0.897281	0.781498	0.945241	0.982209	0.907247	1.11387	1.16444	0.807203	0.773151	1.32695	1.40134	1.08043	0.944669	0.968354	1.09799	0.910015	0.873158	0.957468	1.1464	0.904516	0.880816	1.03204	1.07142	1.04386	1.07351	1.28217	1.50139	0.927757	0.900215	0.904122	0.904545	0.880409	1.23569	0.993926	0.917928	0.778952	0.570195	0.532551	0.776954	1.12428	1.09497	0.967859	0.940746	0.985495
-32.4272	1.31413	1.33125	0.934003	0.971066	0.878572	0.848903	0.970366	0.813223	0.979104	1.0736	1.08963	1.13759	0.838176	1.23489	1.30205	0.904248	0.997811	0.98515	0.838681	1.07637	1.00683	1.11028	0.94265	1.15844	0.766912	0.749599	0.993111	0.961713	0.920856	1.32192	1.28741	1.23663	1.0605	0.845635	0.829299	1.18618	0.888814	1.13599	1.05905	0.9558	0.794097	0.760317	0.63737	0.818328	0.830286	1.03032	0.972646	0.982122	0.984771
-32.3301	1.2679	1.17453	0.838965	1.18314	0.897375	0.99927	0.953201	0.82117	0.93454	1.14224	1.0581	1.0825	0.818398	1.71264	1.18149	1.13705	1.00162	0.88987	0.850229	0.926706	1.03492	1.07148	0.841077	1.02301	0.905235	0.884199	1.05517	0.939478	1.25313	1.1042	1.05877	1.21019	0.941484	0.870781	0.855383	1.15854	1.20039	1.12707	1.00429	1.05192	0.823065	0.905705	0.511488	0.867664	0.951668	0.983602	0.908259	0.974747	0.901994
-32.233	1.09852	0.955089	0.736529	1.13702	1.04204	1.13917	0.817379	0.942593	0.94885	0.860992	1.09016	1.08694	1.16427	0.887313	1.17489	0.890997	1.04688	0.867529	0.953468	0.921088	1.03701	0.894719	0.696125	0.81383	1.18152	1.15171	1.0063	0.984771	1.02632	1.27315	0.961422	1.40787	0.985601	0.918683	0.872863	0.992936	0.87027	0.856636	0.98902	0.849324	0.879174	0.814211	0.631423	0.973683	0.95591	1.11461	0.896957	0.891129	1.01868
-32.1359	1.3144	0.893568	0.913689	0.95149	0.935615	0.831275	1.10137	0.899622	1.07624	0.966041	0.897634	1.00028	0.990368	0.995429	1.11894	0.92367	0.905011	0.881657	1.10255	0.987493	1.0261	0.905564	0.816013	1.0597	1.22973	1.3081	1.02686	1.04279	1.11295	0.997623	1.34628	1.41094	0.956694	0.879581	1.13867	1.00225	0.8297	0.845466	1.17453	0.906485	0.897383	0.762548	0.616821	0.879902	0.987732	1.0544	0.898952	0.980812	1.16125
-32.0388	1.41098	0.913814	1.09765	0.926736	0.982646	0.89652	0.850909	0.867542	0.894408	0.942795	1.13034	1.06411	1.06545	1.0465	1.08381	0.975095	1.05865	0.79018	1.03133	1.10609	1.11592	0.883883	0.881457	1.20749	1.29023	1.40778	1.00267	1.0519	1.14507	0.966044	0.976837	1.25982	0.853667	0.979441	0.953242	1.25242	0.8625	1.04932	1.01289	0.889931	0.910401	0.986334	0.55807	0.896955	0.955227	1.16862	0.81507	1.10984	1.07327
-31.9417	1.26895	1.09759	1.2952	1.07765	1.02765	0.958628	0.828997	0.860145	0.917353	1.08343	1.05202	1.12692	0.862034	1.30955	1.0263	0.938268	0.873743	0.733244	0.980321	1.19994	1.19618	0.797152	0.838014	1.15913	1.3753	1.39404	1.02532	1.01935	0.991305	1.04877	1.11609	1.1722	1.04533	0.864258	0.822054	1.37808	0.971812	1.03556	0.992765	0.95035	0.902273	0.695111	0.594461	1.04667	0.905349	1.02243	0.909881	0.994456	1.13214
-31.8447	1.15864	1.20957	1.29874	1.1056	0.988417	0.839706	0.736097	0.959722	0.953524	1.08151	1.29354	1.01247	0.80792	1.25199	1.08404	0.778934	1.07159	0.745391	0.96973	1.24431	1.25733	0.855909	0.825887	1.03621	1.22858	1.19618	1.03561	0.923804	1.14043	1.21344	1.31729	1.46238	0.812739	0.868004	0.865629	0.997826	0.93318	0.880868	1.04479	0.982609	0.822991	0.735113	0.56568	0.923135	0.985137	1.11855	0.861596	0.90863	0.921194
-31.7476	1.06418	1.28566	1.20528	1.11131	1.06928	0.939869	0.997448	0.892431	0.968001	0.946953	1.18405	1.06164	0.892889	1.54573	1.0848	1.33717	0.838206	0.797662	1.12132	1.03094	1.17304	0.987409	0.829417	0.87602	0.965962	0.906263	1.01301	1.11557	1.08667	1.38152	0.987789	1.66028	0.905159	0.920368	0.873685	0.846248	1.02496	1.02174	0.906888	0.968006	0.878879	0.806661	0.45546	1.02881	1.13051	0.900789	0.993937	0.957125	0.874228
-31.6505	1.15735	1.28077	1.1427	1.11505	0.962589	0.85292	1.05267	1.00529	1.20785	1.00825	1.00341	1.10762	1.03798	1.46754	0.947234	1.2457	1.04893	0.869997	1.35401	0.688706	1.01602	0.914521	0.93646	0.972064	1.1283	1.17476	1.07268	1.04227	1.21806	1.2421	1.20304	1.22951	0.807645	0.996743	0.907502	0.972887	0.969965	0.903301	0.855563	0.965549	0.800884	0.746576	0.536368	0.946771	0.986158	1.02934	1.0154	0.901745	0.958125
-31.5534	1.16552	1.29047	1.10811	1.14927	1.12766	0.894115	0.840889	0.972308	1.06455	1.0151	1.25617	1.03313	1.12212	0.961587	1.16578	0.895572	1.1868	0.899748	1.19451	0.916895	1.07427	0.857395	0.979731	0.963676	1.21565	1.31208	1.08364	1.01614	1.23117	1.25061	1.21407	1.27751	0.929394	0.919498	0.772435	0.996022	1.12668	0.861705	0.926968	0.994234	0.808447	0.971897	0.515934	0.786721	0.942004	1.00516	0.864249	0.984529	1.01838
-31.4563	1.00369	1.32932	1.12948	1.04859	1.05407	1.00948	1.13845	0.933478	0.986708	1.13843	1.47774	1.02832	1.06202	1.05731	1.12106	1.12543	0.947821	0.914601	1.03361	1.1159	1.02194	0.831794	0.895455	0.746421	1.15304	1.18707	1.04827	1.04692	1.01193	1.23019	1.52792	1.23011	0.879041	0.885258	0.83018	1.1751	1.06691	0.85765	0.944894	0.819147	0.774517	0.859678	0.540775	0.893862	1.09674	1.06807	1.06742	0.890852	1.01249
-31.3592	0.883954	1.42813	1.16819	1.03188	1.01577	0.938268	0.994492	1.0424	1.08387	1.14304	1.18336	1.00864	1.10113	0.947756	1.04586	1.0166	0.988143	0.899655	0.869894	1.25653	0.748479	0.689705	0.85078	0.612136	1.07391	1.05526	1.03664	1.0428	0.882806	1.07963	1.30426	1.1592	0.844876	0.891104	0.936236	1.21145	1.03589	0.959805	0.877501	0.85329	0.772451	0.901693	0.548846	0.89917	0.873756	1.04088	0.865604	0.849396	0.966032
-31.2621	0.785259	1.55692	1.21557	1.08346	1.04696	1.08139	0.838492	0.919156	1.16371	1.00951	1.30941	0.985535	1.00922	1.01584	1.11146	0.876247	1.00245	0.814112	0.890433	1.21442	0.720165	0.489374	0.825906	0.519336	0.98652	0.920055	1.02695	0.984979	1.09739	1.11946	0.98982	1.23342	0.892032	0.918258	1.00045	0.943758	0.950955	1.16068	0.836555	1.03638	0.804957	0.771903	0.526907	0.807234	0.765308	0.89118	0.980087	0.977044	1.01452
-31.165	1.02426	1.50134	1.20999	0.980351	1.08593	1.07686	0.849095	1.29723	1.05708	1.08365	1.24586	0.995924	0.823988	1.1055	1.00703	0.922246	0.929721	0.693269	1.0031	1.08093	0.814424	0.762145	0.723742	0.70942	0.97865	0.9426	1.06384	1.02998	1.28411	1.32536	1.25699	1.31446	0.811477	0.911073	0.786651	1.0897	0.85492	0.832842	0.944451	0.914818	0.862723	0.768752	0.490825	0.869572	0.90004	0.938029	0.784865	0.862897	1.14867
-31.068	1.1365	1.45262	1.18373	0.93642	1.00809	1.02404	0.850213	0.869348	1.02206	0.950642	1.12325	0.995157	0.867755	1.13014	1.02428	1.05523	0.881512	0.904852	1.0782	1.18295	0.91682	0.858213	0.693531	0.817087	0.965431	0.954491	1.03344	1.00884	1.2177	1.14046	1.2233	1.23319	0.885758	0.918791	0.962574	0.978756	1.05602	0.944487	0.947388	0.984143	0.89841	0.962979	0.603334	0.987574	0.863117	1.09018	0.98142	0.94668	0.842378
-30.9709	0.995191	1.41763	1.1161	1.05708	1.07429	1.03612	0.876189	0.87706	1.08181	1.3587	1.32188	0.964384	1.09045	1.06938	1.07904	0.970999	0.924224	0.952533	1.10363	1.21605	1.10005	0.600873	0.807225	0.759922	0.941512	0.945075	1.0362	1.02952	0.843965	1.26665	1.32484	1.11738	0.92305	0.895339	1.22038	1.11538	0.875578	0.979057	0.858431	1.03744	0.809062	0.923326	0.585051	0.929738	1.02337	0.983651	0.980874	0.879091	1.02753
-30.8738	0.97233	1.41055	1.09576	1.04665	1.07166	1.06694	1.1688	1.21164	1.04391	0.992161	1.01107	0.944814	1.09966	1.05784	1.04483	1.37138	0.885602	0.672411	1.0297	1.11133	1.44494	0.628159	0.874544	0.725984	0.907022	0.941176	1.053	1.14443	1.06939	1.0697	0.882533	1.24887	1.02752	0.845649	0.813753	1.17003	1.11459	0.90741	0.954378	0.907996	0.791544	0.660883	0.454342	0.966509	1.23661	0.989791	0.888218	0.930127	0.913333
-30.7767	1.00869	1.41743	1.09906	1.02442	1.02188	0.966456	0.988946	1.0724	1.00428	1.0429	1.18195	0.914646	0.890732	0.926613	1.06447	0.861514	0.846619	0.67401	0.974799	0.964719	1.35575	0.797757	0.918676	0.70366	0.867248	0.940035	0.994639	1.06101	0.910949	1.06385	1.1764	1.27073	0.905565	0.973375	0.801677	0.9863	0.947882	0.9606	1.08151	0.929373	0.811036	0.964509	0.539506	0.918102	1.04126	0.959221	1.02532	0.966434	0.942571
-30.6796	1.20726	1.50224	1.19764	1.03911	1.09588	1.13668	0.976779	1.00908	1.49352	1.10314	1.09211	1.02427	0.889709	0.913371	1.01953	0.874727	0.779916	0.81647	0.92941	0.797157	1.04952	0.658534	0.788273	0.725283	1.07788	1.07994	1.07086	1.12932	1.22853	1.1423	1.15488	1.14048	0.846651	0.8691	0.88494	1.19059	0.983203	0.880832	0.990686	0.962593	0.864295	0.983077	0.596407	0.91259	0.869422	1.01768	0.898569	0.948422	0.965837
-30.5825	1.24137	1.52666	1.25011	1.05944	1.1694	1.12531	1.01332	1.24366	1.09592	1.16593	1.1731	1.15194	0.978398	0.75832	0.934901	1.02019	0.93278	0.896628	1.03375	0.963252	1.06492	0.579314	0.703372	0.714931	1.18548	1.14012	1.02294	1.04699	0.987824	1.10635	1.10051	1.32429	0.984776	0.953547	0.834613	0.958073	0.915823	0.888634	1.04339	0.82407	0.810394	0.737296	0.563583	0.925696	0.920367	0.882594	0.830985	0.996272	0.932685
-30.4854	0.946533	1.43031	1.21039	1.14746	1.02914	1.11775	1.36428	1.25755	1.13574	0.975336	0.993525	1.10215	0.958824	0.912562	0.876868	0.98596	0.889733	0.917513	1.07574	1.03276	1.12955	0.620102	0.709475	0.640631	1.087	1.04087	1.00234	0.993436	1.11283	1.22142	1.40067	1.03158	0.869579	0.980472	0.977393	1.08045	0.871422	0.990683	0.874054	0.972664	0.826101	1.08982	0.553172	1.09229	0.932499	0.926823	0.732717	0.946576	0.992418
-30.3883	0.937794	1.41942	1.09644	1.07053	1.05156	1.16811	0.86619	1.22445	1.05276	1.08431	1.16846	0.940895	0.939254	1.1884	0.99798	0.903246	0.719947	0.819853	0.993015	0.909108	1.29264	0.657224	0.691234	0.680969	1.15449	1.15462	1.05021	0.94778	0.797416	1.22358	1.25081	1.10224	0.985759	0.900965	0.808935	0.999052	0.906163	1.06066	0.922395	0.845338	0.788573	1.01572	0.529722	0.896608	1.01644	1.08676	0.991816	1.0299	0.933442
-30.2913	1.0721	1.45128	0.945375	1.08983	1.04741	1.08295	0.953316	1.04782	1.01743	0.960677	1.20202	1.09135	0.910054	1.21288	0.966052	0.815667	0.878859	0.862826	1.02556	0.993526	1.36406	0.692513	0.66082	0.778627	1.30497	1.37488	0.984419	0.961268	1.01422	1.01786	1.0472	1.16891	0.752916	0.940242	0.799085	1.1838	1.01341	1.0108	1.01804	0.852129	0.846716	0.752653	0.517093	1.06988	0.977963	0.990978	1.0657	0.93769	0.890011
-30.1942	0.921523	1.35455	1.08937	0.976627	1.1413	0.977696	0.883629	1.13795	1.30834	1.25127	1.21834	1.09011	0.893405	0.924907	0.790847	1.05171	0.964947	0.976115	1.11575	1.18198	1.38964	0.678491	0.896848	0.705859	0.992354	1.0049	0.976103	1.09416	1.11574	1.13264	1.23595	0.984331	0.967462	0.924313	0.923073	1.02433	0.908807	0.836103	0.924827	0.952541	0.881339	0.881387	0.538521	0.847579	1.02361	1.02368	0.810502	1.0438	1.15447
-30.0971	0.887425	1.30459	1.27596	1.05262	1.03366	1.04833	1.08857	1.42601	1.32571	1.17998	0.925035	1.16571	0.945272	0.708338	0.937471	1.05875	0.766551	0.902313	1.08916	1.22285	1.13781	0.668899	1.01625	0.666218	0.852462	0.828932	0.979873	1.10587	1.01822	1.16105	1.27856	1.24812	1.03015	0.854829	0.817699	1.14686	0.799276	0.895679	0.827711	1.14895	0.860476	1.08874	0.51038	0.779902	1.0139	1.01208	0.889308	0.997055	1.06031
-30	1.08629	1.34815	1.54778	1.27406	1.08191	0.925274	1.20491	1.38347	1.24165	1.09005	1.16024	1.03779	1.00222	0.673673	0.891841	1.26105	1.0311	0.817132	1.08643	1.17627	1.01346	0.668167	0.902408	0.692833	1.05801	1.041	0.962657	1.21689	1.04605	1.19443	1.32125	1.18111	0.94741	1.02301	0.787426	1.07023	0.958687	0.925468	0.919003	1.04595	0.845422	1.05248	0.509454	1.0015	0.870789	0.98953	0.756236	1.0329	0.898512
-29.9029	1.21174	1.28415	1.44752	1.19452	0.937804	1.34346	1.10903	1.00888	1.39467	1.17738	1.09288	1.15869	0.900663	1.25093	0.975325	0.935497	0.770852	0.709194	1.13141	0.954802	1.14406	0.750953	0.788813	0.793717	1.12509	1.09777	0.992358	1.00667	0.895985	1.19865	1.12812	1.46377	0.84739	0.83448	0.862202	1.01537	1.03842	0.895656	0.859625	0.915876	0.85842	0.792259	0.541333	0.899373	1.17824	0.987116	0.951596	0.987864	0.977143
-29.8058	1.30049	1.16636	1.16124	1.08413	1.00421	1.09099	1.26524	0.84343	1.10905	0.985105	0.9119	1.14386	0.948739	0.905676	0.882794	0.826705	0.858701	0.763565	1.03115	0.993914	1.26958	0.875499	0.675341	0.931737	1.12294	1.07691	1.02975	1.07544	1.14134	1.01884	1.15588	0.931918	0.857921	0.850965	1.04739	0.909453	0.978354	1.019	1.01775	0.824891	0.836826	0.834462	0.533349	0.849499	0.941353	0.971266	0.900424	0.953972	1.09232
-29.7087	1.14353	1.30857	1.23856	1.15441	1.02744	1.23403	1.20068	1.57168	1.25649	0.944096	1.11827	1.11352	1.00094	0.819587	0.795055	0.901553	0.964369	0.89909	0.858288	1.16332	1.39257	0.850614	0.744184	0.889313	1.12263	1.10557	0.992878	0.928099	1.16633	1.28136	1.20776	1.16193	0.959388	0.881787	1.14056	1.11089	0.847588	0.943473	0.906004	0.877326	0.902148	0.750753	0.557977	0.956282	1.27685	1.11915	0.905964	0.920083	1.03595
-29.6117	1.07017	1.42971	1.20312	1.23041	1.09949	1.15019	1.08198	1.18706	0.876314	0.913187	0.933285	1.02517	1.15627	0.926849	0.827029	0.793243	0.910023	0.894471	0.966692	0.900735	1.05608	0.837994	0.783738	0.840794	1.08781	1.08722	1.0093	0.911542	1.02092	1.08272	0.937765	1.54557	0.89202	0.937048	0.867318	1.22432	0.787673	0.897359	1.10357	1.00053	0.842261	0.669738	0.52368	0.919439	1.20052	0.952799	0.962389	1.04088	0.885809
-29.5146	1.16403	1.50869	0.942165	1.09536	1.10242	1.17912	0.904161	0.852395	1.25865	0.999547	1.02212	1.02219	0.96256	0.853339	0.91931	0.865092	0.791028	0.892721	0.995854	0.808816	0.8274	0.849905	0.764713	0.780086	0.983965	0.974801	0.993166	1.04686	0.916126	1.1271	1.03482	1.27415	0.83233	0.840421	0.803334	0.979969	0.948853	0.886197	0.877183	0.826984	0.818518	1.0835	0.560691	0.92983	1.10486	0.893479	0.904585	0.930224	0.925307
-29.4175	1.19607	1.38201	0.874372	1.06999	0.971171	1.12275	0.981972	1.07928	1.02801	1.12296	1.59741	1.05164	1.12205	1.13781	0.804397	0.859149	0.774796	0.896711	0.866534	1.05822	0.814362	0.832729	0.84021	0.872022	1.08294	1.0603	0.967593	0.953568	0.970198	0.983634	1.03271	1.24208	0.982852	0.870697	0.829995	0.880641	0.807951	0.974979	0.933027	0.979595	0.78187	0.829554	0.483514	0.931022	1.02184	1.09511	0.946763	1.0051	0.975031
-29.3204	1.1972	1.15251	0.903159	0.873345	0.971302	1.13558	1.51561	1.24952	1.07756	1.21254	0.942409	1.01193	1.00554	0.715033	0.850731	0.761029	0.78386	0.900601	0.775587	1.21391	0.682362	0.80101	0.962969	1.04028	1.28331	1.24476	0.977074	0.998564	1.13585	1.08152	0.975401	1.4136	0.940314	0.893043	1.02003	0.95042	0.917098	0.967691	0.928558	0.86819	0.8313	1.08368	0.604086	0.95757	0.973305	1.17388	0.975671	1.15346	1.19827
-29.2233	1.03068	1.25624	1.37032	1.04894	1.0492	1.12054	1.07099	1.17935	1.27087	1.00649	1.04159	1.13567	0.987839	0.88699	0.774604	1.01664	0.796223	0.904442	0.703827	1.32274	0.49088	0.78952	0.82931	0.971538	1.05651	1.07512	0.988545	0.96852	0.954562	1.08737	0.977115	0.974301	0.924169	0.954837	0.890173	1.05464	0.88952	0.964768	0.925547	0.915545	0.793984	0.993467	0.46599	0.914031	1.15567	1.22985	0.912454	1.02353	0.939213
-29.1262	0.939137	1.30735	1.53725	1.14665	1.10526	1.10807	1.0406	1.30712	1.25177	1.22744	1.10492	1.32663	0.947591	1.07038	0.778062	0.848246	0.837127	1.02685	0.880085	0.96124	0.816642	0.779592	0.780932	0.910679	0.90489	0.942924	1.03009	0.871236	1.03847	1.20581	1.23316	1.10632	0.943697	0.884793	0.753517	1.02749	0.859247	0.920276	0.934062	0.933868	0.817045	0.600332	0.508181	1.00343	1.30278	0.922691	1.01158	1.0989	0.996197
-29.0291	0.997529	1.25325	1.10375	1.27038	1.04824	1.10832	0.771876	1.30465	1.24839	1.02154	0.956929	1.1295	0.96933	0.725994	0.864918	0.870015	0.97097	1.12518	0.95789	0.753035	0.940999	0.772785	0.903114	0.865586	0.903662	0.885583	1.04987	1.0075	1.10493	0.939582	0.911999	1.17734	1.03333	0.859165	0.762802	1.01947	1.00601	1.14711	1.02494	0.996448	0.78447	0.951931	0.623871	1.00236	1.12932	0.890275	1.09657	1.04508	1.17857
-28.932	1.02236	1.16109	1.04175	1.03875	1.01848	1.21172	1.28265	1.07873	0.89999	1.18008	1.23615	1.11852	0.935214	0.811436	0.832905	1.11585	0.823337	1.17535	0.838791	0.851427	0.662544	0.768551	0.909858	0.934264	1.03699	1.02367	1.02007	0.918694	1.05664	1.16913	1.18381	1.20504	0.938288	0.938865	0.954123	0.833884	1.02673	0.91955	0.976323	0.850119	0.782098	0.754939	0.535909	0.96403	1.01995	1.07215	0.920835	1.06946	1.13397
-28.835	1.03041	1.04989	1.1655	0.981386	1.09204	1.24778	0.887498	1.14879	1.13693	1.20205	1.18313	1.04397	1.00007	1.15244	0.713826	0.827973	0.846768	1.02195	0.873002	0.980074	0.671361	0.765605	0.858883	1.05983	1.2376	1.25947	1.0612	1.05312	0.894331	0.947458	1.21616	1.66528	0.843409	1.0232	1.12157	0.92806	0.944384	0.978573	0.915599	0.983488	0.821548	0.915209	0.613534	1.04867	1.10105	0.889008	1.23544	0.964378	0.947367
-28.7379	1.21179	1.18415	1.43293	1.19975	1.05606	1.03736	1.2996	1.17851	1.10692	0.989802	1.03423	1.17785	0.910302	0.723479	0.852684	1.05631	0.849595	0.766771	0.983868	1.12385	0.823814	0.752089	0.839861	1.02798	1.02299	1.04399	1.00488	1.03951	0.876561	0.946354	1.16249	1.30011	0.818248	0.864962	0.933954	0.925513	0.853685	0.873074	0.885165	0.762955	0.792335	0.931659	0.496694	1.19244	0.955179	0.963189	0.953751	1.03369	1.14178
-28.6408	1.28031	1.2448	1.51732	0.995075	1.04215	1.1657	1.04398	0.842654	1.12563	1.09071	1.22831	1.12397	0.794298	0.980303	0.761294	0.870053	0.698786	0.865778	0.95884	1.12162	1.00957	0.761498	0.797925	1.07805	0.867775	0.901104	0.976805	1.06146	1.06259	1.06408	1.08319	1.22212	0.924211	0.83007	0.818568	0.937034	0.903965	0.828648	0.850373	0.917524	0.799284	0.694306	0.494026	0.890933	1.10521	1.21446	0.988628	1.16581	1.0479
-28.5437	1.12312	1.15822	1.23565	1.32785	1.07073	1.16381	0.856877	1.10046	1.00198	0.948844	1.11292	1.03757	0.954057	0.940885	0.792052	0.928499	0.953129	0.942459	0.931947	1.08739	1.10868	0.816758	0.710163	1.29196	0.831333	0.903421	0.998455	0.994757	0.910399	1.00908	1.08363	1.50628	0.800472	0.864216	0.825434	0.990903	0.833057	0.906615	0.959811	0.850707	0.886647	0.845801	0.509044	0.813216	0.844321	0.83895	1.04226	0.906241	1.03013
-28.4466	1.04038	1.14116	1.09365	1.03348	1.04663	1.27302	1.0452	1.35055	0.976461	1.04713	0.925525	0.988609	0.965996	0.949523	0.667701	0.894841	0.823845	0.974491	0.901323	0.989164	1.03453	0.70303	0.769363	1.14566	0.875379	0.940659	1.05628	0.957264	0.879123	1.11042	1.07495	1.3114	0.82219	0.998502	1.09266	0.869516	1.18471	0.88052	0.884384	0.851146	0.877666	0.837519	0.562925	1.28784	1.08625	0.967801	1.0504	0.988461	1.0369
-28.3495	0.994857	1.15886	1.02149	1.23963	1.09742	1.19236	1.31794	1.25089	1.03872	1.0511	1.06039	1.10285	1.03876	0.955598	0.835022	0.932518	0.927804	0.958405	0.891794	0.992145	0.918506	0.504806	0.902044	0.819266	0.959668	0.995358	1.05292	1.05146	0.960743	0.89021	0.993579	1.13355	0.854366	0.843485	0.771808	0.796594	0.86777	0.959185	0.805015	0.865517	0.831096	0.657486	0.524229	1.05532	1.23312	0.770481	1.21063	0.994901	1.17229
-28.2524	1.10684	1.25099	1.12959	0.73919	1.13026	0.983963	0.975901	0.956886	1.04755	0.932808	0.902169	1.10241	1.01288	0.845601	0.758469	0.86261	0.769116	0.918262	0.892814	1.04573	0.781556	0.692279	0.803135	1.08341	0.762331	0.831804	1.05195	0.9534	0.91814	0.948966	1.1478	1.17666	0.881324	0.841638	0.738908	1.01739	1.05486	0.933497	0.982583	1.07097	0.88808	0.948203	0.542246	1.30186	1.13892	0.866974	1.06783	1.04852	1.02956
-28.1553	1.25889	1.28242	1.14834	1.03965	1.05521	1.19093	0.932328	1.02573	1.06328	1.10221	0.976624	1.01025	0.958601	0.970709	0.745252	0.831937	0.813834	0.897975	0.811954	0.982469	0.847225	0.823059	0.767654	1.19462	0.705993	0.790123	1.02628	1.14799	1.00469	1.14785	1.02587	1.16184	0.843313	0.841778	1.0312	0.856771	1.11774	0.858088	0.903048	0.886706	0.856119	0.57157	0.496439	1.11236	1.01476	1.07735	0.943751	1.06749	1.06921
-28.0583	1.4911	1.19246	0.988383	1.03222	1.1256	1.08249	1.45666	1.11252	1.17471	1.03028	1.07792	1.08809	0.970582	0.941179	0.829126	0.881456	0.793853	0.851665	0.75541	0.933753	0.880243	0.840457	0.859032	0.999931	0.931653	0.992188	0.955424	1.01222	0.94885	0.894702	1.27816	1.00393	0.963628	0.845925	0.942812	0.877924	0.967646	0.82528	1.01237	0.963869	0.876746	1.07272	0.574009	1.05174	1.12024	1.06551	1.21173	1.10776	0.981005
-27.9612	1.41207	1.21002	0.983215	0.91202	1.07643	1.06898	1.40914	1.04579	1.04462	0.972293	1.0653	1.0651	0.791322	1.21172	0.753155	1.00112	0.79424	0.753309	0.747498	0.914124	0.847958	0.831132	0.836753	1.042	1.04148	1.12688	0.92111	0.991352	1.12658	1.23948	1.33174	1.14871	0.960094	0.991002	1.09793	1.01836	0.840638	1.03066	0.905526	0.963883	0.858775	0.839139	0.494379	0.744742	0.781139	0.893083	1.30919	0.981138	1.1284
-27.8641	1.17742	1.28135	1.05544	0.970135	1.09685	1.04565	1.01109	1.21122	1.33711	1.03682	1.10925	0.991047	1.01699	1.03189	0.777733	0.846743	0.831988	0.782471	0.801861	0.859489	0.925536	0.808446	0.757645	1.20245	1.09339	1.22788	0.919363	1.05416	0.868916	1.16857	1.10287	0.980531	0.934508	1.00047	1.03395	0.952091	1.00711	0.979134	0.943352	0.872288	0.870342	0.673424	0.540002	0.944924	0.964103	1.04267	1.2457	1.09683	1.03934
-27.767	1.19439	1.20077	1.37086	0.959823	1.02548	1.00367	1.09591	1.15314	0.926786	1.09908	1.02179	0.94341	0.905131	0.902277	0.740376	0.982096	0.689898	0.875391	0.887361	0.787352	1.05805	0.898209	0.838064	1.10729	1.24025	1.28925	0.903048	1.07405	0.848161	1.00189	1.06587	1.1244	0.995652	0.82692	0.793007	1.26153	0.969995	1.00788	0.934782	1.0067	0.877896	0.820899	0.571394	1.09899	1.12444	0.940819	1.15251	1.03995	1.11968
-27.6699	1.22309	1.12994	1.54328	0.847449	1.06744	1.11489	0.959981	1.19377	1.28379	0.920627	1.05579	0.992569	0.86354	0.872512	0.786799	0.939017	0.982973	0.98915	0.977343	0.865665	1.04537	0.939442	0.922225	0.987555	1.34407	1.34073	0.934823	1.02897	1.0126	1.07116	1.03455	1.30494	0.949236	0.832964	1.07724	0.986998	1.01129	1.07714	0.886707	0.998718	0.866234	0.915433	0.552422	1.10904	1.08442	0.807324	1.2039	1.02028	1.09604
-27.5728	1.27524	1.0786	1.42969	0.994262	1.01079	1.16695	1.35162	0.857135	1.27942	1.21053	1.05922	0.935022	0.829931	0.989175	0.785847	0.84636	0.762639	1.04122	1.0126	0.966138	1.16086	0.883615	1.01387	0.81867	1.3618	1.37243	0.920675	1.08411	0.906828	1.14824	1.16441	1.07187	0.968421	1.0073	0.963302	1.30071	1.07251	1.06226	0.960754	0.849136	0.812915	0.725736	0.458309	1.09606	1.00738	0.93863	0.989974	0.986819	1.05212
-27.4757	1.27548	1.10823	1.21426	0.972094	1.02984	1.24807	1.48508	1.34748	1.21518	0.897536	1.07102	0.955204	0.945744	1.16237	0.690818	0.8739	0.742188	0.9699	0.938389	1.11093	1.53268	0.896032	1.02994	0.753442	1.09701	1.07634	0.848861	0.970556	0.883937	1.07531	1.17574	1.35372	0.903944	0.98417	1.07362	1.0631	0.876243	0.975681	0.898261	1.00504	0.782938	0.885798	0.447342	1.16633	1.01134	0.868365	1.25623	0.998468	0.953988
-27.3786	1.24976	1.17834	0.947906	0.915916	1.0112	1.16307	0.863406	1.09785	1.2063	0.913642	1.09469	0.859503	0.883269	0.848515	0.778716	0.782126	0.793364	0.942205	0.83104	1.10679	1.48374	0.942571	1.00823	0.740042	0.690965	0.616355	0.89281	0.917343	0.76031	1.01453	0.907635	1.14599	0.98665	0.922154	0.784311	1.00828	0.793752	0.899199	0.962736	0.879608	0.838984	0.911875	0.619293	1.12718	1.06721	0.871282	1.07353	1.00769	0.775615
-27.2816	1.35363	1.25934	1.02184	0.904924	1.02924	1.18033	1.11726	1.05127	0.969721	1.13166	1.34866	1.02048	0.894786	1.04962	0.700508	0.800051	0.799573	0.93632	0.70712	1.02817	1.22441	1.03088	0.951862	0.666848	0.770664	0.765	0.979078	0.985981	1.10893	0.912045	1.23689	1.34896	0.946614	0.9084	0.949294	0.871307	0.887428	1.00719	0.908046	0.863398	0.785939	0.744528	0.554289	1.08201	1.31015	0.88504	1.0766	1.09289	0.962108
-27.1845	1.35992	1.24984	1.10412	0.699325	1.05643	1.17269	1.08474	1.25048	1.09244	1.06292	0.949179	0.973831	0.919946	1.04509	0.756858	0.838225	0.88957	0.954641	0.917296	1.14889	1.41612	1.04112	0.926719	0.67111	0.889388	0.92719	0.950611	1.12948	1.11164	1.01782	1.14181	1.37235	0.948494	1.08808	0.969844	0.926834	0.945544	0.813801	1.00413	0.912564	0.825384	0.82695	0.522014	1.11509	1.04818	0.930239	0.992523	1.02661	1.09765
-27.0874	1.17109	1.05936	1.20308	1.0428	0.993167	1.09422	1.00932	0.965245	1.05569	0.97422	1.1138	0.949189	1.21136	0.872732	0.788376	1.09814	0.785891	0.94343	1.11748	1.21004	1.48331	0.895215	0.964029	0.830285	1.08616	1.11647	1.03161	0.952288	1.08885	1.0766	1.21425	1.2896	0.96377	0.841567	0.923583	1.2499	0.912201	0.892084	1.04328	0.956967	0.743809	0.872053	0.650601	1.08695	1.30227	0.791871	1.01518	1.03879	1.00025
-26.9903	1.09982	1.05135	1.19573	0.883924	1.01921	1.18506	1.15324	1.15224	1.29355	0.99143	1.11149	0.981824	0.884368	1.02948	0.719362	0.885496	0.851531	0.873153	1.29768	1.15203	1.30148	0.847109	1.03532	0.927724	1.13823	1.18988	1.03692	1.01426	1.04572	1.05817	1.14351	1.55088	0.945651	1.03231	0.763139	0.931108	0.807104	0.876403	0.847157	0.909936	0.800569	0.687025	0.755871	0.867817	1.29515	1.06439	1.22947	1.05947	1.02119
-26.8932	1.08732	1.13458	1.13523	1.00607	1.02054	1.04429	1.05215	0.980352	1.00692	1.2279	1.10585	0.929542	1.06419	0.793735	0.764853	0.958	0.821813	0.916664	1.24655	1.05338	1.38683	0.847904	1.12359	0.994296	1.11795	1.20534	1.00874	1.0025	1.08152	1.31215	1.15406	1.42418	0.781135	0.800409	0.728107	0.976603	0.933512	0.932689	0.900898	0.86049	0.776685	1.14458	0.563464	1.1107	1.24535	0.920797	1.10568	0.967202	0.953338
-26.7961	1.12673	1.11502	0.90495	0.998918	1.05226	1.06041	1.10327	1.01894	1.3188	0.953614	1.10383	1.09181	0.887157	0.838111	0.657359	0.816474	0.783309	1.01707	1.07975	0.93441	1.60578	0.878788	1.01143	1.18231	1.12481	1.19162	0.911613	1.17288	1.20504	1.00928	1.20915	1.15968	1.03135	0.933803	0.959008	1.15214	0.962359	0.883698	1.01962	0.912867	0.836053	0.804142	0.536122	1.19729	1.12053	0.949735	1.29523	0.975625	1.10506
-26.699	1.13231	1.06744	0.771524	0.961575	0.990959	1.10104	1.06811	0.930085	1.15527	1.30437	1.16025	1.03659	1.05239	0.918211	0.774984	0.892745	0.884779	0.946047	0.972196	1.18218	1.29242	0.944186	0.980274	1.30797	1.18244	1.22668	0.99931	1.00956	1.15834	1.25847	1.23649	1.2568	1.00504	0.921716	1.0077	1.02418	0.99687	1.01348	0.886707	0.975158	0.873383	1.00429	0.5144	1.19281	1.41768	0.835516	1.15776	0.957436	1.15
-26.6019	1.07022	0.963818	0.831811	0.988347	1.11298	0.96646	1.02603	0.990762	1.16601	1.0334	1.04219	1.05332	1.24772	1.00615	0.641047	0.818531	0.953394	0.919077	0.955075	1.28335	1.06894	1.07861	1.11113	1.30893	1.34164	1.35931	1.0506	1.02143	0.963413	1.35072	1.27704	1.53124	0.994535	0.888864	0.910559	1.03496	0.93474	1.09823	1.08876	0.913939	0.962916	1.05307	0.589521	1.08028	1.19381	0.931854	1.16396	1.16898	1.12068
-26.5049	0.970713	0.972081	0.843696	1.138	1.10439	1.00493	0.973619	1.18165	1.07672	1.10401	1.10911	0.990287	1.03617	0.822794	0.756015	0.855437	0.740937	0.980208	1.11882	1.09134	1.02521	1.06285	1.04516	1.26657	1.32438	1.32045	1.05341	0.993543	1.10217	1.09265	1.09829	1.44984	1.01726	1.09326	1.15864	0.958796	0.915634	0.918801	1.07195	1.03682	0.85782	0.72345	0.595361	1.09069	1.309	0.921653	1.32292	0.995611	1.04207
-26.4078	0.852495	1.03629	0.831378	1.11027	1.16872	1.15821	1.22538	1.01288	1.08505	0.923748	0.960213	0.960921	1.00371	0.738132	0.722955	0.954363	0.735591	0.959652	1.01642	0.951914	1.06752	0.971991	0.880763	1.20253	1.21888	1.19584	0.942796	1.03462	1.08434	1.30051	1.33181	1.27849	0.950452	1.05199	0.969462	1.13684	0.984118	0.949466	1.01103	1.00633	0.885777	0.854567	0.481561	1.15757	1.06429	1.03624	1.17837	1.01282	0.99077
-26.3107	0.887395	0.990917	0.790728	0.755743	1.11803	1.20213	1.23385	0.866444	0.986909	1.04459	1.11128	1.08649	0.939639	1.01628	0.67692	0.878843	0.748927	0.898253	0.780947	0.838782	1.15285	0.997145	0.89385	0.98729	1.30206	1.40656	0.980432	0.924892	0.944509	1.2707	1.26096	1.39589	1.01221	1.06278	1.06575	0.764918	1.38873	0.905768	1.0269	0.916696	0.923392	0.881027	0.539237	1.1685	1.12841	0.876689	1.04387	1.06274	1.09478
-26.2136	0.925468	0.935887	0.825412	0.894587	1.05441	1.09771	1.10967	1.13915	1.13594	1.25053	1.05026	1.08881	1.16943	1.00546	0.679043	0.867419	0.798801	0.996608	0.935116	0.923415	1.34594	1.03052	0.950626	0.946021	1.43767	1.59743	0.904609	0.901965	0.982919	1.07622	1.06327	1.22369	1.09642	1.09317	0.841526	1.18551	1.156	0.854282	0.929195	1.13989	0.945101	0.805686	0.566542	1.04539	1.3336	0.708211	1.03741	1.04709	1.18311
-26.1165	0.969885	0.861543	1.01076	1.00443	1.03975	1.06673	1.04188	1.14581	0.921574	1.0629	1.01569	1.06848	0.792375	0.935147	0.838786	0.885247	0.70016	1.01164	1.00495	0.925702	1.44215	1.08034	1.09478	1.25269	1.67815	1.74861	0.908817	0.954742	1.1411	1.27997	1.37528	1.40213	1.02339	1.03127	1.17482	0.720073	1.17889	0.815587	0.975406	1.19685	0.970172	0.747217	0.465756	1.2818	1.34567	0.93896	1.3997	0.960464	1.0858
-26.0194	0.9489	0.958451	1.11271	1.07005	1.00635	1.092	0.891264	1.00042	0.930094	1.04552	0.950098	1.22576	0.957187	0.864566	0.726293	1.1922	0.781998	0.860011	0.906117	0.763297	1.34461	1.04811	1.03173	1.37447	1.44274	1.51773	0.848614	0.811162	1.087	1.23506	1.24629	1.31325	1.10659	1.06512	1.0137	0.670704	0.996442	0.88709	1.14181	1.00405	0.917497	1.01676	0.529283	0.954427	1.39478	1.0744	0.876292	1.03305	0.935146
-25.9223	0.895213	1.14099	1.17296	0.966532	0.996089	1.06613	1.34938	1.11912	0.925435	1.00833	0.971168	1.15962	0.848062	1.00949	0.724606	0.888843	0.927964	0.89544	0.863671	0.833982	1.21106	0.97487	0.865075	1.4038	0.969381	1.09581	0.881015	1.01274	1.31711	1.13903	1.36607	1.38335	1.05982	1.09042	1.01448	0.761559	1.14619	0.976811	1.03925	0.874412	0.873327	0.79025	0.547485	1.11013	1.36232	0.912142	1.0685	1.11347	1.08824
-25.8252	0.868456	0.969797	1.09553	0.957719	0.982053	1.24578	1.21079	1.26556	1.10918	1.14738	0.998009	1.02459	0.883203	0.883547	0.63046	0.876978	0.782171	1.0244	0.849419	1.02121	1.0595	1.02349	1.10023	1.17671	0.904837	0.90931	0.833162	0.978738	1.2977	1.11975	1.37961	1.15445	1.11188	0.956084	1.237	0.780223	1.0128	1.01095	1.13002	0.981501	0.869159	0.869898	0.506142	1.00555	1.40257	0.793104	1.31595	1.03524	1.01967
-25.7282	0.880091	0.898407	1.03904	0.934584	1.05111	1.20583	1.02102	1.17096	1.19276	1.0497	0.937182	1.10125	1.0932	0.927084	0.69063	0.986463	0.9494	0.90075	0.865516	0.953285	1.00832	0.991242	1.16634	1.09846	0.8653	0.812303	0.839135	0.993129	0.9146	1.1259	1.4065	1.42119	1.10238	1.11169	1.16087	0.736774	1.2663	0.884977	0.971709	1.03273	0.817105	0.973289	0.51768	1.01872	1.39991	0.930791	1.23228	0.965807	1.04905
-25.6311	0.968508	1.02661	1.02446	0.854791	0.984489	1.0582	0.858351	1.02717	1.00906	1.10016	0.854548	1.12348	1.02248	0.925685	0.722136	1.05023	0.790165	0.839549	0.940917	0.921301	0.983155	0.797273	0.894367	1.31789	0.87578	0.89428	0.919746	0.948707	1.1465	1.28186	1.29102	1.25379	1.11868	0.989308	1.08661	0.927863	0.921559	1.01364	1.02788	0.897903	0.844457	0.717682	0.557052	1.04805	1.23008	1.05504	1.01302	0.952282	0.99753
-25.534	0.899422	1.0877	0.938096	0.912741	1.02937	1.06519	1.05134	1.1876	0.912158	0.946605	0.998813	1.1889	1.01274	1.22747	0.612757	0.958596	0.782254	0.903238	1.13493	0.961202	1.01002	0.853259	0.879913	1.31769	0.775033	0.796221	0.927611	0.930994	1.04825	1.01601	1.17663	1.46509	1.0994	1.02584	1.27142	0.930848	0.852001	1.08615	1.1232	0.893488	0.861633	0.934912	0.490653	1.09244	1.24794	0.986418	1.13256	0.997652	0.941479
-25.4369	0.751585	1.11523	0.815846	0.908434	1.00007	1.04608	0.988661	0.999277	0.965466	0.941701	1.10813	0.926106	0.937729	0.69099	0.652665	0.935632	0.933984	0.962657	1.09047	1.0385	1.07194	1.03422	0.994219	1.20768	0.618674	0.608144	0.87669	1.08298	0.870299	1.28741	1.11298	1.17858	1.03612	0.972546	1.24581	0.725146	1.02132	0.96246	1.0419	0.781	0.822321	0.907932	0.525852	1.16824	1.24823	0.936038	1.01394	0.939241	0.897742
-25.3398	0.822298	0.959962	0.889531	1.05219	1.03852	1.25736	1.20555	1.10557	1.0004	1.07149	1.20285	1.17359	1.09308	1.20668	0.651003	0.748644	0.888259	1.01994	0.926786	1.1345	1.15139	1.08541	0.943562	1.27787	1.1225	1.12352	0.983059	1.06582	1.35487	1.14564	1.20489	1.26622	1.11567	1.00387	0.889431	1.04864	1.03982	0.891608	0.992777	0.89919	0.834444	0.825767	0.515919	1.22717	1.26897	0.882494	1.02771	0.911999	1.13658
-25.2427	0.845696	0.850529	0.95258	0.889406	1.04499	1.03912	0.83492	1.02135	1.06159	1.07855	0.857262	1.1372	0.985594	1.27012	0.664505	1.05062	0.817827	0.888745	0.945589	1.06297	1.0775	1.07618	0.959188	1.29525	1.40126	1.36166	0.990272	0.97485	0.984557	1.0579	1.31544	1.33673	1.04235	0.940442	1.17914	0.965128	1.12628	1.12624	0.926196	0.891437	0.831942	0.715172	0.445104	1.08028	1.07441	1.00886	1.02574	1.11931	1.02756
-25.1456	0.774463	0.832774	0.994359	1.03539	1.03269	1.18755	1.05648	1.15901	0.973113	0.898803	0.972105	1.10867	0.99405	0.825679	0.755703	0.854206	0.897362	0.783162	0.950817	0.97156	0.971378	0.946135	1.10738	1.20702	1.22991	1.04535	0.972897	1.02068	1.12913	1.11363	1.33778	1.60289	1.05037	1.01721	1.45837	0.968334	1.08389	1.03771	1.14913	0.907364	0.883269	0.697106	0.558374	1.07926	1.09306	0.841708	1.2804	0.977023	0.962921
-25.0485	0.772069	0.974554	0.899916	1.10486	0.962218	0.986945	0.884028	1.27045	1.12732	0.9834	0.818161	1.0582	0.944299	0.954849	0.833939	0.808897	0.781358	0.728802	0.928897	0.840404	0.800774	0.914903	1.0775	1.24629	1.0541	0.923626	0.921911	0.98719	1.05828	1.18854	1.14628	1.20085	1.0132	1.01594	1.37903	0.853672	0.867788	0.847221	1.10657	1.00217	0.812425	0.908877	0.595196	0.988626	1.00906	0.877218	0.881752	0.899933	1.00514
-24.9515	0.804094	1.1961	0.737361	0.984471	1.00406	1.07875	1.1175	1.1688	1.14095	1.05541	0.96093	0.982696	0.976011	1.05643	0.928983	0.898957	0.887783	0.782625	0.856641	0.960385	1.00358	0.933079	0.958588	1.34931	0.876058	0.899193	0.927065	1.03123	0.820631	1.2094	1.20313	1.58687	1.05322	1.06281	1.17455	0.687114	1.18407	0.891176	1.04065	1.0277	0.899706	0.653395	0.643179	1.03504	1.25077	1.04499	0.856924	0.927894	1.11109
-24.8544	0.885124	1.00446	0.702403	1.03094	1.05849	1.03276	1.49776	1.0652	0.956765	0.998546	0.868804	1.15723	0.966391	0.955335	1.13343	0.822858	0.780254	0.89054	0.759218	1.20593	1.3931	0.815352	0.928453	1.08634	0.734999	0.770246	1.00128	0.857755	0.957572	1.37587	1.18605	1.5774	0.936133	1.01419	1.16443	0.762282	0.840381	0.895203	0.985605	1.02659	0.88122	0.772747	0.479009	1.13218	0.90435	0.964623	1.10065	0.969733	1.03978
-24.7573	0.935144	0.863246	0.710233	0.844669	1.00778	1.07381	1.17198	1.24415	0.973137	1.08388	1.08965	0.924888	0.943674	0.965309	1.2414	0.926806	0.797921	0.845799	0.793663	1.13618	1.25416	0.810659	0.917554	0.954953	0.686172	0.74059	0.964667	0.958197	1.14386	1.20291	1.13617	1.15503	0.927755	0.913724	0.921025	0.649709	1.03282	0.860676	1.14359	1.02446	0.862739	0.621506	0.471848	1.04707	1.13776	0.784774	1.02405	0.923708	1.06603
-24.6602	0.923142	0.822885	0.80364	0.878658	1.07509	0.992403	1.35076	1.31118	1.11527	1.06511	0.93514	1.08922	0.934265	0.927407	1.19855	0.817225	0.871039	0.852855	0.898128	1.05675	1.15314	1.03204	0.945128	1.08673	0.821811	0.909517	0.942303	0.967479	1.01519	1.03753	1.23754	1.02731	1.05328	0.965176	1.17899	0.83913	0.919762	0.92835	1.10319	0.878639	0.846338	0.862257	0.579699	1.14945	1.05599	0.876115	1.04265	0.92366	1.19454
-24.5631	0.82042	0.777065	0.874712	0.918788	1.08926	1.21068	1.20548	1.14346	1.08327	1.12301	1.0309	1.11388	1.07449	0.876748	1.33379	0.941343	0.846083	0.963502	1.14263	0.957967	1.12796	1.09732	0.965821	1.17797	0.997515	1.08012	0.948036	0.937862	0.974506	1.14837	1.2535	1.43174	1.07377	1.046	1.35568	0.821157	1.0806	0.946697	0.976339	1.01599	0.84914	0.923109	0.487357	1.1287	0.979678	0.882856	1.08634	1.00761	1.00552
-24.466	0.672338	0.728515	0.934615	1.06951	1.04228	1.24481	1.09382	0.986219	0.97521	0.961539	1.25817	1.06286	0.939713	0.969931	1.41165	0.908151	0.873262	0.940896	1.11605	0.937268	1.20977	1.08456	0.983073	1.24894	1.19325	1.25155	0.976187	1.04461	0.854256	1.17112	1.2534	1.45732	0.939714	0.922886	0.975991	0.916363	1.0816	0.790074	0.955718	0.882256	0.869258	0.574291	0.557838	1.07871	1.06223	0.929598	1.13848	1.00514	1.04584
-24.3689	0.812226	0.742269	0.851321	1.04053	0.940887	1.19797	1.43434	1.45608	1.29596	1.1739	1.13469	1.14934	0.964191	1.00298	1.28938	0.883648	0.861865	0.851664	0.953914	0.955611	1.34508	0.923978	0.854195	1.25193	1.18033	1.19372	0.932048	0.92601	1.19892	1.06579	1.35021	1.61214	0.93724	1.16506	0.878999	0.93168	0.952048	0.796818	1.10604	0.943114	0.880752	0.753201	0.51406	1.11159	1.07426	0.887066	0.968889	1.10356	0.867135
-24.2718	0.937001	0.756722	0.806567	0.968494	0.981138	1.01174	0.975445	1.24443	1.20219	1.10322	1.19831	1.0528	0.999969	0.961528	1.23373	0.937459	0.872433	0.863052	0.988903	1.0304	1.28045	0.88724	0.846126	1.23028	1.22521	1.20142	0.998277	0.977738	1.02379	1.08746	1.32897	1.35589	1.09098	0.931276	1.12051	1.05015	1.02308	0.911005	0.944685	0.806327	0.843999	0.938403	0.496843	1.17055	1.18626	0.949621	0.862394	0.926977	1.01022
-24.1748	1.03155	0.77257	0.838892	0.860934	1.13142	1.10601	1.04933	0.988279	1.18913	1.02331	0.982552	1.0794	0.874977	0.813334	1.2525	1.22174	0.942297	0.866158	1.02339	1.04656	1.22365	1.09819	1.07968	1.15931	1.38567	1.34021	0.964	0.864634	0.999184	1.05922	1.2455	1.08658	1.00544	1.12385	1.13394	0.681697	1.2105	0.879476	1.01979	0.850376	0.826159	0.711927	0.524148	1.04415	1.02195	1.00004	1.06375	0.99668	0.991336
-24.0777	0.995261	0.773843	0.842968	0.972757	0.983739	1.10123	0.966074	1.09222	1.14333	1.02284	1.24759	1.12243	0.840729	0.819159	1.22079	0.860976	0.955252	0.852701	1.05689	0.94549	1.18252	1.08361	1.09156	1.06472	1.31395	1.24969	1.00991	1.10563	0.993585	1.0633	1.22322	1.08608	0.981843	1.01537	0.982857	1.02662	1.02463	1.00401	0.96218	0.828966	0.893483	0.872833	0.644269	1.10734	1.01655	1.02557	1.12464	1.02987	0.920028
-23.9806	0.893546	0.767827	0.832919	0.811073	0.985027	1.18094	0.916121	0.884298	1.14297	1.19064	0.940167	1.09864	0.941207	1.26517	1.28019	1.05077	1.02997	0.880855	1.0647	0.846119	1.01607	0.956251	0.992607	0.958304	1.12615	1.04452	0.890337	1.1223	1.00962	1.03995	1.06642	1.15225	0.964085	1.02779	0.948659	1.14099	1.0465	0.935563	1.1142	0.881108	0.875961	0.960904	0.574122	1.06391	1.04985	1.143	0.96678	0.966858	1.01427
-23.8835	0.962007	0.789182	0.822386	0.808555	1.01678	1.02701	0.749051	0.987279	1.16351	0.997628	1.14025	1.22233	1.3	0.988262	1.18521	1.1251	1.0058	0.929814	1.05967	0.7476	0.786949	0.977478	0.983609	1.05556	1.00546	0.962543	0.877466	0.919694	0.934853	0.913247	1.05033	1.27648	1.03406	1.03099	1.11034	0.994466	0.883224	0.979762	1.07009	1.15711	0.907516	0.911392	0.531662	1.00873	1.01696	0.919619	1.00067	0.969889	1.0926
-23.7864	0.971923	0.825276	0.834287	1.00846	0.991907	1.12443	0.870744	0.948509	0.979783	1.00938	0.813037	1.28373	0.897514	1.2206	1.18253	0.980576	1.15482	0.929711	1.05245	0.897309	1.12662	0.987681	0.962448	1.15861	0.941065	0.92477	0.902035	1.07778	0.726486	1.1198	0.99784	1.33015	1.10576	1.16646	0.852014	1.00801	1.34785	0.904883	0.91969	1.02047	0.851251	0.96831	0.5563	1.0266	0.957079	1.03145	1.09632	1.02986	0.972495
-23.6893	0.864751	0.890845	0.891056	0.772201	1.05092	1.07567	0.680996	1.11162	1.22982	1.03778	0.980275	1.25945	0.94595	1.60299	1.11224	1.22172	1.20901	0.918414	0.985267	0.947031	1.40247	0.975835	0.916962	1.27323	0.98925	0.975405	0.893942	1.0964	0.87237	0.871299	0.800763	1.48476	1.03494	1.10967	1.08293	0.840292	0.975529	0.823139	1.10027	1.04724	0.804319	0.861179	0.582982	0.992565	0.893689	1.08595	1.04307	0.967631	0.970745
-23.5922	0.849285	0.839927	0.937786	0.978008	1.0858	1.19597	0.803718	1.24511	0.94964	1.0267	0.793615	1.30091	1.14764	1.12973	1.17248	0.924401	1.03891	0.88473	0.798133	0.796782	1.55064	0.932476	0.8461	1.20948	1.02814	1.04451	0.932087	0.900923	0.915871	0.986272	0.932604	0.924122	1.06198	1.13945	1.05345	0.995368	1.2151	0.971724	0.940718	1.0334	0.868937	0.926061	0.558445	0.948505	0.899114	0.976157	1.15216	0.950049	1.0664
-23.4951	0.879672	0.730765	0.979495	0.881141	0.992343	0.98778	1.12338	1.16195	0.899141	1.06674	0.960501	1.10155	1.10493	0.836876	1.10897	1.05785	1.15476	0.910681	0.774375	0.928577	1.32719	0.873362	0.762551	1.05654	1.06239	1.12286	0.915243	0.963345	0.926701	1.13493	1.01139	1.38889	1.05998	0.998277	1.03026	0.94934	1.18457	1.02538	1.00788	0.816437	0.858083	0.769232	0.537165	1.06544	0.974847	0.885476	0.958991	1.01455	1.0333
-23.3981	0.781513	0.704734	0.884764	1.12204	1.08956	1.09852	1.08441	1.0514	1.19001	1.016	0.914973	1.05292	0.976184	1.18092	1.23305	1.24257	1.32365	0.966448	0.832306	1.2014	0.917931	0.942347	0.813392	1.16872	1.20376	1.23316	0.923388	1.01729	1.23088	0.980783	1.04322	1.09681	1.04477	1.05321	0.941445	0.889094	1.14141	0.936479	1.00732	0.981616	0.872834	0.934845	0.632322	0.981981	0.890468	1.0493	0.943507	0.884982	1.04861
-23.301	0.73716	0.676329	0.84261	0.765812	1.01091	1.1014	0.729821	0.964283	1.04097	1.21416	0.918503	1.11464	1.41828	1.20303	1.02352	1.09677	1.282	0.926277	1.106	1.13252	1.06121	0.961201	0.909039	1.17281	1.28269	1.29028	0.921732	0.951859	1.00546	0.957701	1.10922	1.12537	1.14441	1.11392	1.04893	0.723456	1.17518	0.952008	0.97313	0.99085	0.919216	1.01791	0.581364	0.830004	1.01159	1.09485	1.02098	0.974163	1.06561
-23.2039	0.800419	0.64318	0.905611	0.779864	0.924247	1.00378	1.13093	1.10623	1.05032	1.19474	0.724906	1.0851	1.11622	1.38289	1.16463	1.04879	1.26399	0.902776	1.25903	1.10933	1.12453	0.879794	1.0943	0.960745	1.23672	1.24105	0.898238	0.860334	1.06339	1.19883	1.16712	0.958495	1.03646	0.974046	0.990949	1.00658	1.14917	0.836187	1.0637	0.952091	0.900975	0.822087	0.463637	1.08195	0.994513	1.02425	0.992349	0.875307	0.761645
-23.1068	0.846263	0.680335	0.897616	1.07035	1.01593	0.928809	0.899949	1.10908	1.07537	1.03661	0.934773	1.04408	1.15203	1.07385	1.06127	1.12887	1.21447	0.912611	1.17071	1.17753	1.02795	0.873113	1.13794	0.993483	1.19452	1.20988	0.911918	0.954152	1.04296	1.06366	1.24231	1.34113	0.86779	1.15142	1.31001	1.11044	1.06615	0.999961	0.921409	1.06306	0.8713	0.833137	0.535705	1.07187	0.885705	1.06933	0.968054	0.927361	0.938276
-23.0097	0.8834	0.752642	0.854123	1.038	1.04485	1.08661	1.08762	1.03571	0.96931	0.86595	0.931078	1.19429	0.938621	1.17864	1.16987	0.86967	1.19031	0.984691	0.972449	1.1208	1.19175	0.903794	1.11077	1.14862	1.1542	1.18775	0.887029	0.920059	1.11771	1.18193	1.41779	1.09368	0.977742	1.1455	1.22215	0.932024	1.10992	0.895967	1.06772	0.863566	0.796238	0.976469	0.518392	0.939505	0.886156	1.05134	0.875746	0.899461	1.04877
-22.9126	0.792246	0.77108	0.978581	0.958664	0.998199	1.09331	0.812917	0.891921	1.01266	1.06458	0.969478	1.22925	1.04573	1.01139	1.03581	0.857515	1.31383	1.08789	0.719214	1.00161	1.48575	0.747227	0.964752	1.23875	1.15942	1.07275	0.959795	0.996885	0.989843	1.08831	1.15202	1.0642	1.06814	0.974282	1.21596	1.17334	1.16118	0.963724	1.16124	1.09251	0.918556	0.707165	0.47585	0.963816	0.985634	0.976183	1.00063	0.955837	0.97055
-22.8155	0.771704	0.772168	1.04191	0.825966	0.992053	0.958325	1.39277	1.17232	0.946114	1.18046	1.12988	1.13802	1.22185	1.63418	1.04747	1.25841	1.20809	0.919689	0.970351	1.00384	1.29659	0.679883	0.898672	1.24914	1.14211	1.01694	0.980581	0.975703	0.973021	1.23587	1.00628	1.11575	1.02607	1.04395	0.885009	1.01296	1.39655	1.03435	1.0216	0.850497	0.85954	0.823948	0.549366	0.72129	0.833866	0.892491	1.1783	0.906845	0.922425
-22.7184	0.892387	0.738557	0.982961	0.923283	0.962727	1.13861	0.801925	1.03681	1.25879	1.00709	0.864784	1.23293	0.984038	1.15127	0.995586	1.09716	1.53668	0.816191	1.12348	0.983149	1.12026	0.790982	0.992464	1.10004	1.07972	1.07949	1.06162	0.954997	0.902157	1.08348	0.930525	1.07297	1.06003	0.919222	1.01634	1.06459	1.04836	1.01793	1.0555	0.998181	0.898436	0.924442	0.508851	0.97146	0.979923	1.00277	0.978464	0.905687	0.903076
-22.6214	0.840223	0.732794	0.870014	0.843028	0.978455	1.10428	0.887829	1.32211	1.24986	0.900189	0.865705	1.17381	0.993237	1.18561	0.994082	1.30573	1.24905	0.842107	1.0806	0.916617	0.96959	0.770696	0.942279	0.99547	1.01349	1.0374	0.9649	1.03515	0.898143	0.959025	1.06509	1.13293	0.993405	1.07892	1.04211	1.08433	0.95259	0.807353	1.06749	0.902807	0.984938	0.824508	0.615865	0.847537	0.893295	0.845814	0.973444	0.938077	0.962126
-22.5243	0.701635	0.740955	0.730066	0.718096	1.0058	1.04689	0.940624	0.911828	0.986732	1.05244	0.779297	1.10839	1.13451	1.14901	0.943613	1.10762	1.32212	0.860142	1.12627	0.958131	0.930782	0.684719	0.820105	0.913163	0.945327	0.942985	0.986831	1.20773	0.732343	0.930839	0.893236	0.944802	0.934452	0.857723	0.947003	1.06743	1.42692	0.861646	1.07702	1.02696	0.865948	1.01181	0.538421	0.811389	1.09399	0.936538	0.98798	0.938202	1.07197
-22.4272	0.730605	0.740648	1.03418	1.02669	0.923508	1.04104	1.00669	1.0709	1.06176	1.05255	0.8162	1.12812	1.1816	1.36612	0.993658	1.17466	1.31146	0.874238	1.21622	1.05367	0.947907	0.844131	0.798433	0.837223	0.951226	0.966197	0.969348	1.00486	0.801826	0.969488	0.81397	1.02133	1.00419	1.09545	1.16905	0.747734	1.07585	0.848009	1.06429	0.921046	0.822149	1.01712	0.571274	0.871909	1.00827	1.01389	1.06394	0.968098	1.04183
-22.3301	0.74276	0.739278	1.18403	0.904502	0.958457	1.11343	0.807609	0.824221	1.0836	0.961281	1.0419	1.13918	1.15712	0.990513	0.892771	1.10364	1.28808	0.968011	1.18079	1.06269	1.0642	0.963034	0.776729	0.848106	1.00982	1.02315	0.922047	1.14328	0.868542	0.960436	0.815805	1.19786	1.02493	0.991207	0.957191	0.955939	1.18485	1.05481	1.01977	0.924172	0.819666	0.926465	0.471556	0.903846	0.8581	1.11198	0.988258	0.883754	0.953273
-22.233	0.721288	0.735782	1.02532	0.969955	0.95528	1.02891	1.06079	0.984729	1.04231	1.02571	0.816218	1.04239	1.05009	1.39647	0.966979	0.983154	1.38577	1.02122	1.10802	1.08556	1.1292	1.00092	0.754961	1.03263	1.17381	1.14758	1.00616	1.07118	0.825928	1.15556	0.949634	0.913599	0.997657	1.10327	0.79347	0.834926	1.30012	1.14511	1.02655	1.00992	0.823328	1.07691	0.539451	0.973123	1.04157	0.995958	1.01366	0.858517	0.842044
-22.1359	0.764594	0.695926	1.02962	0.829486	0.930055	1.05641	0.607682	1.03078	1.00606	1.09495	0.972971	1.10162	1.01647	1.50403	0.910861	0.997694	1.18161	0.993317	0.960574	1.13611	1.09163	1.01418	0.767014	1.03817	1.0118	0.984986	1.04171	1.01429	0.924967	1.12282	0.914034	1.07435	1.0475	1.03462	1.14143	1.16085	0.931279	0.987451	1.20471	0.940292	0.812905	0.921036	0.568587	0.860601	0.887095	1.11165	0.9423	0.955986	0.925498
-22.0388	0.840288	0.63789	1.11544	0.828001	0.940596	1.02004	0.706641	1.14553	1.13191	0.984774	1.01862	1.01397	1.223	1.21413	0.916462	1.15712	1.32744	0.970286	0.973685	1.10665	1.19689	1.01515	0.795978	0.954206	0.686779	0.678884	1.03068	1.04396	0.933839	1.06985	1.05364	1.17651	1.0094	0.955059	0.942024	1.00768	0.884802	1.01685	1.08805	0.952872	0.793941	0.744312	0.579193	0.9462	0.898174	0.892999	1.02346	0.918246	0.945249
-21.9417	0.798442	0.675137	0.956954	0.963149	0.954911	1.02961	1.14148	0.89512	1.18218	1.08083	1.21024	1.19619	0.926832	1.17049	0.945636	1.26424	1.19611	0.949693	1.06708	1.03719	1.37358	0.793568	0.821344	0.984383	0.780273	0.749456	0.999957	0.98618	0.975248	1.25402	1.03021	0.879617	0.94968	1.09006	1.05595	0.896436	1.02886	0.960623	0.923316	0.879216	0.80502	0.949399	0.543981	0.868266	0.874394	1.06691	0.963569	1.0709	0.899362
-21.8447	0.751635	0.724545	0.84219	0.800911	0.966166	1.09392	1.09638	0.782782	1.20049	1.14695	1.10507	1.18519	0.854069	1.07183	0.81908	1.49458	1.28229	0.988273	1.09066	1.05079	1.20972	0.634707	0.849154	0.992863	0.896232	0.8669	1.02133	0.969714	0.785688	1.03331	1.023	1.097	1.0447	0.958331	0.949966	0.840705	0.842435	1.11109	0.905891	1.02832	0.842915	0.75219	0.517341	0.868277	0.858217	1.00142	0.807942	0.897566	0.925415
-21.7476	0.694904	0.798271	0.814862	0.804005	0.936311	1.06895	0.843479	1.19531	1.10342	0.963257	0.786625	0.95776	1.26964	1.24463	0.820673	1.57902	1.40654	0.994183	1.09418	0.994023	1.10481	0.601279	0.881855	0.95795	1.05712	1.07809	1.09785	0.966652	1.07184	1.04307	1.05387	1.05104	1.04062	0.874315	1.00092	1.10388	0.85806	1.03075	0.976294	0.930834	0.870422	1.03689	0.51012	0.891229	0.963222	0.89533	0.792087	0.884214	0.859246
-21.6505	0.742693	0.895034	0.793886	0.803976	0.980584	0.928267	0.820505	1.19031	0.936336	1.11066	0.883087	0.992342	0.95718	1.80967	0.828117	0.885861	1.48327	0.934755	1.05757	0.796509	1.11781	0.681072	0.845242	0.890108	1.18015	1.22536	1.01208	1.03932	0.883554	1.03592	0.919925	1.10745	1.06872	0.971568	1.06069	1.18049	0.889976	1.00645	1.06833	0.947142	0.938297	0.79259	0.653741	0.885403	0.935062	0.885261	1.19315	0.941788	0.962089
-21.5534	0.842743	1.00331	0.776087	0.874986	0.975108	0.952253	0.779877	0.867053	0.914844	0.95731	1.05673	1.03699	0.967532	1.31963	0.856126	1.05039	1.44543	0.959501	1.1557	0.86836	1.08533	0.817477	0.773973	0.805801	1.28425	1.34067	1.06269	0.947945	0.828713	0.994884	0.957002	1.09786	0.951668	0.983889	1.16618	1.18382	1.01781	1.11407	0.899313	1.08591	0.912425	0.736372	0.506746	0.901834	0.892239	0.872328	0.766587	0.986423	0.887977
-21.4563	0.718536	0.840735	0.797479	0.850545	0.94163	0.97897	0.778644	0.926808	1.10102	1.14047	1.1045	1.01778	1.13587	0.788998	0.764364	1.47471	1.32988	1.02633	1.32119	1.07489	1.0301	0.886317	0.811535	0.943704	1.1391	1.21499	1.03385	0.834535	0.933888	1.11049	0.915384	0.996132	1.04797	0.984096	1.16914	0.945752	0.981482	0.924833	1.15661	0.951385	0.843262	0.945769	0.634997	0.880524	0.822625	1.01952	0.813437	0.983703	1.07681
-21.3592	0.699251	0.715524	0.822875	0.846559	0.95644	1.00098	0.910654	0.860215	0.980044	0.921443	0.926312	1.03829	1.05182	1.22594	0.729605	1.09051	1.37193	1.20811	1.12706	1.0468	1.04037	0.907384	0.904379	1.01448	0.988549	1.08116	1.08912	1.01012	0.932851	1.08473	0.943629	1.17832	1.10034	1.14857	0.952501	0.929248	1.04926	1.0176	1.08723	0.964317	0.873438	0.847804	0.588303	0.938403	1.01045	0.785621	0.845703	0.92206	1.03711
-21.2621	0.889813	0.665053	0.85628	0.94308	0.836595	0.947629	0.895704	1.0878	1.06647	1.01422	0.865644	1.10359	1.03958	1.06963	0.866802	0.900267	1.53528	1.2742	0.990561	1.00106	1.07917	0.832905	1.10779	0.951013	0.827193	0.931068	1.1162	1.01253	0.856717	0.950518	0.984167	1.21561	0.988151	1.02591	1.00446	1.24416	0.868491	0.780772	1.05489	0.928368	0.826668	0.863681	0.496135	0.755744	1.09914	0.972634	0.90805	0.910753	1.03471
-21.165	0.862391	0.661479	1.00201	0.916364	0.912797	0.963368	0.790033	1.03615	1.0498	1.18787	0.951113	1.05898	1.11561	1.63691	0.839821	0.963691	1.38654	1.10891	0.969338	0.920005	1.17504	0.907741	1.00315	0.91147	0.90654	0.976841	1.06518	1.06715	0.730549	1.1913	1.10313	1.32867	1.1157	1.09131	1.24353	0.91275	0.789976	1.01434	0.928527	0.979732	0.805498	0.731385	0.447537	0.834096	0.980153	1.0207	0.967208	1.06371	1.02834
-21.068	0.725977	0.681354	1.20391	1.0091	0.878309	1.05913	0.854322	0.992488	1.07242	1.10869	1.11701	0.972114	1.07661	1.00106	0.801359	1.08881	1.37209	1.01742	0.98101	1.02855	1.36397	1.05723	0.744491	0.883892	1.10624	1.12055	1.04329	0.880831	1.08354	1.13267	0.995453	0.757232	0.983996	0.948892	1.24982	0.854821	1.05231	0.907636	0.959622	0.932911	0.833905	0.674625	0.554552	0.895802	0.903945	1.00477	0.812403	0.99014	0.94297
-20.9709	0.649766	0.696705	0.975683	0.871564	0.840625	1.00557	0.708946	1.03387	1.10161	1.26835	0.975213	0.984523	1.11207	1.41448	0.900658	1.06291	1.17629	0.962815	1.00913	1.2319	1.59943	0.982316	0.90483	0.99948	0.890517	0.948064	1.1219	1.07468	0.863689	1.08656	1.05035	0.993158	0.988335	0.95517	1.19149	0.951234	1.40712	0.914646	0.894891	0.9435	0.917792	0.953085	0.557571	0.907478	1.14284	0.934414	0.904933	1.00282	0.961301
-20.8738	0.618963	0.70615	0.831886	0.982701	0.907448	0.891633	1.0107	0.867003	0.94034	1.07708	0.908763	0.960672	1.08849	1.07204	0.928482	1.25955	1.13441	1.10034	1.14923	0.982526	1.53849	0.928022	0.986159	1.04219	0.792582	0.858148	1.10491	1.0089	0.982427	0.913903	0.864355	1.2821	0.997877	0.960326	1.38629	0.929769	0.926209	0.997319	0.964077	1.03633	0.917757	0.869818	0.560631	0.85404	0.778485	0.969579	0.948142	1.04637	1.25216
-20.7767	0.678973	0.703785	0.856946	1.00147	0.905034	0.918224	0.850088	0.950401	1.3623	1.15888	1.07396	0.947869	0.995885	0.813245	1.12177	1.1707	1.31752	1.19601	1.22294	0.7887	1.38786	0.914975	0.909469	0.939123	0.930221	0.933364	1.1072	0.945736	0.919297	1.12055	0.962567	0.986026	0.991082	0.869408	0.910071	0.912114	1.08261	1.07886	0.991219	0.953331	0.858161	0.8897	0.551028	0.93181	0.97991	0.973186	0.986381	1.04601	1.02144
-20.6796	0.782559	0.746033	0.925698	0.91865	0.909195	0.965546	0.850179	0.970758	0.954868	0.989413	0.969091	0.916823	0.87036	1.1698	1.29311	1.27584	1.19039	1.20798	1.16386	0.705961	1.05785	0.818111	0.835921	0.920031	0.893185	0.894454	1.12829	1.02527	1.05898	0.990485	1.03411	1.17082	1.01107	1.07178	1.10551	0.884681	0.964155	0.947127	0.909315	1.06661	0.866557	0.838473	0.583705	0.982769	0.902346	0.893537	0.742768	0.93656	0.976595
-20.5825	0.907932	0.810587	1.0163	0.880674	0.895393	0.989738	0.854288	1.08447	0.992087	1.03378	0.803652	1.05854	0.921019	1.1512	1.49418	1.32426	1.28602	1.10119	1.19905	0.715286	0.856688	0.679338	0.763944	0.942924	0.768811	0.798481	1.04435	0.932765	1.02934	1.11278	1.12043	1.09364	0.946704	0.962885	0.997316	1.04533	1.15136	0.893726	0.869921	0.831793	0.847285	0.942292	0.485382	0.824646	1.06843	0.994624	0.981883	1.03104	0.92625
-20.4854	0.833749	0.854234	1.17575	0.876825	0.977329	0.959178	0.935546	0.888116	1.09121	1.26566	0.994593	1.08854	1.03462	1.04594	1.36269	0.913787	1.21487	0.935025	1.28139	0.770645	0.719952	0.794366	0.748538	0.856553	0.852863	0.885385	1.07642	0.8716	0.960509	0.771337	1.17609	0.948721	1.00422	0.879318	0.942163	1.03435	1.19647	1.05852	1.05147	0.833341	0.803282	1.01928	0.488659	0.909897	0.983525	1.00181	0.846712	0.927492	0.779144
-20.3883	0.785561	0.849395	1.18678	1.03827	0.957629	0.894043	0.916806	0.928181	1.15843	1.02892	0.964618	1.06739	1.08273	1.0504	1.44566	1.34569	1.21621	1.01141	1.33297	1.10591	0.940225	0.808361	0.745134	0.809843	0.951714	0.97817	1.10543	0.907541	0.992292	1.023	1.20095	1.13518	1.08504	0.980331	1.16435	0.968264	0.982435	0.888088	0.924671	0.815964	0.887846	0.865089	0.494372	0.951395	0.91652	1.11086	0.943229	0.944164	1.05562
-20.2913	0.789361	0.747586	0.900934	0.951638	0.909543	0.906204	0.690184	0.934008	1.03151	1.08966	1.13128	1.08373	1.27272	1.59093	1.34498	0.82382	1.11283	1.03762	1.29177	1.25009	1.10177	0.620291	0.765733	0.842458	1.08016	1.08272	0.934836	0.959083	1.02052	1.06591	1.09618	1.22321	0.932989	0.87349	1.22227	0.927088	1.12239	0.949149	0.918011	0.972334	0.875833	0.693005	0.562234	0.885279	1.0233	1.04975	1.04827	0.918314	1.04242
-20.1942	0.912224	0.729015	0.873777	0.919035	0.886212	0.964456	0.797291	1.11766	0.926324	1.08403	1.01698	1.0451	0.998108	1.07447	1.48034	0.939461	1.40824	0.963455	1.06501	1.01211	1.14585	0.595988	0.797836	0.863243	0.972459	0.981018	1.08507	0.951005	0.916174	1.03041	1.01019	1.01553	1.03033	1.0402	1.16603	1.00969	1.01968	0.831865	1.0258	0.920517	0.889485	0.877592	0.592563	0.973001	0.963536	1.1524	0.767641	0.890806	0.989604
-20.0971	1.09462	0.752065	0.975964	0.928947	0.991049	0.945954	0.920344	1.05658	1.07765	0.962085	0.976143	0.995572	1.01334	1.21042	1.37085	1.01412	1.26522	0.960851	0.963346	0.956035	1.09068	0.65357	0.83569	0.878113	0.746674	0.77619	1.07911	1.00626	0.995671	1.07828	0.975298	0.976764	0.952801	1.0029	1.10766	1.21786	0.987684	1.09211	0.887655	1.03862	0.851717	0.886676	0.636636	0.929463	1.04621	0.798497	0.980386	0.952123	0.979752
-20	1.05239	0.728741	0.995917	0.952411	0.891597	0.913676	0.737067	1.00972	1.05489	0.927829	0.985616	1.01807	1.13189	1.47681	1.392	1.23807	1.08985	0.994026	0.924239	0.990921	0.985872	0.739577	0.891288	0.68721	0.803692	0.846104	1.08081	0.909716	0.886249	0.880351	1.16998	1.18515	0.963926	0.935524	1.05961	1.01362	1.05713	0.989525	1.10083	1.05445	0.880724	1.06767	0.553894	0.901631	0.83783	0.932348	1.08457	0.920565	0.938508
-19.9029	0.973878	0.714736	0.966398	0.894573	0.938454	0.911488	0.782216	0.997854	1.03978	1.11351	0.992509	0.968251	1.02029	1.1073	1.39706	0.860476	1.16802	0.843333	1.16086	0.908032	1.05136	0.789151	0.856279	0.592719	0.867068	0.905386	1.11104	0.959016	0.988646	0.942391	0.949214	1.01652	0.972044	1.00036	1.0138	1.05579	0.845171	0.877772	0.947611	0.995866	0.89861	0.768791	0.67731	1.01634	0.895393	0.939092	0.958806	0.957058	0.89191
-19.8058	0.822776	0.719369	0.837938	0.923916	0.950776	0.841184	0.954286	1.01619	0.957772	1.05167	1.05123	0.950878	1.03755	1.36739	1.24743	1.10504	1.26812	0.8019	1.27507	0.849774	1.09758	0.765854	0.640054	0.691053	0.943162	0.943406	1.13476	0.986876	1.1812	1.0537	0.872918	1.28604	1.11496	0.94973	1.40766	1.12748	1.01945	0.999022	0.894521	0.946288	0.925748	0.972749	0.632689	1.09872	1.02174	0.958655	1.08588	0.934273	0.991707
-19.7087	0.845133	0.677711	0.96332	0.847837	0.930393	0.947765	0.803432	0.964694	0.96117	0.992845	1.01824	0.89081	0.901809	1.4137	1.28158	1.3535	1.2417	0.978985	1.14445	0.840777	1.10526	0.72772	0.688845	0.793527	0.889778	0.881915	1.05449	0.882039	0.995212	1.03736	0.952493	1.24344	1.01759	1.03389	0.947536	1.11621	0.906009	0.862145	1.01333	0.963004	0.873381	0.885769	0.635957	0.786076	0.838154	1.09236	0.814537	0.997838	0.964031
-19.6117	0.95422	0.612907	1.21562	0.866055	0.928541	0.955415	0.880776	0.789041	1.11942	0.947414	0.873289	1.33965	1.10037	1.32064	1.25374	1.42186	1.42339	0.9334	1.13652	0.829696	1.074	0.682166	0.870145	0.898072	0.771655	0.770668	0.982267	0.929526	0.904089	0.904627	1.2347	1.0837	1.09914	1.02951	1.12881	1.3581	1.19597	0.888181	0.983563	1.117	0.886024	0.939302	0.680526	0.889545	0.93075	1.09781	0.936112	0.943481	1.16635
-19.5146	0.889259	0.884352	0.880831	0.841054	0.970601	0.913205	0.786267	1.11385	0.916178	0.928788	0.843146	1.33972	1.07206	1.27228	1.16863	1.20461	1.33707	0.77648	1.18993	0.817572	1.02327	0.785203	0.778637	0.833587	0.790206	0.807409	1.15024	0.979029	0.882517	0.991481	1.19324	1.09877	1.04647	1.04338	1.13248	1.10825	1.08094	0.932794	0.871141	0.985313	0.869561	0.733315	0.66299	0.848304	0.890781	1.07586	1.03586	1.07124	0.9531
-19.4175	0.870702	0.969896	0.658718	0.915706	0.906507	0.918402	0.839794	0.85577	0.983988	0.998787	0.989093	1.35385	0.928797	0.814069	1.28323	0.847667	0.984362	0.905796	1.03377	0.989531	1.1962	0.815372	0.761842	0.767807	0.779996	0.804699	1.03353	1.12515	0.790065	0.967399	1.0922	1.01789	0.995602	0.95062	1.20141	1.08183	1.18314	0.724548	0.971221	0.931237	0.951384	0.89761	0.605467	0.922778	0.81156	1.0336	0.953869	1.00063	0.818833
-19.3204	0.944951	0.683634	0.661966	0.843424	0.955917	0.918417	0.79752	1.01942	0.950058	0.922518	0.946875	1.37099	0.927372	1.15317	1.16199	1.087	1.07256	0.955929	0.967921	1.04193	1.31556	0.699805	0.894475	0.699436	0.712261	0.723087	1.01711	0.874037	0.884578	1.03947	1.14768	1.25881	0.884075	0.945623	1.33336	0.897381	1.18248	0.993444	0.969177	0.973025	0.847807	0.901367	0.727294	0.885422	1.00925	1.1038	1.07544	0.908718	0.964439
-19.2233	0.941457	0.650824	0.766795	0.897899	0.864758	0.892019	0.707166	1.00822	0.96758	1.03274	0.911715	1.22259	0.859498	1.53224	1.22746	0.967635	1.1041	0.847694	1.08271	0.855191	1.32778	0.806631	0.8732	0.817696	0.811819	0.851236	1.11451	0.877484	0.801644	0.920604	1.1228	1.16539	0.992679	0.979639	0.873373	0.977834	1.21875	1.02287	0.982846	1.14063	0.947481	0.908338	0.647397	0.955957	0.83031	1.03251	0.956964	0.934026	0.960617
-19.1262	0.899092	0.74474	0.922414	1.04599	0.887171	1.03025	0.600982	0.859195	0.938259	0.832346	1.02545	1.24766	0.870123	1.42322	1.11412	0.844609	1.21131	0.835589	1.15784	0.830789	1.12762	1.02465	0.774972	1.02927	0.995024	1.08427	1.03399	0.960315	1.09838	0.957145	1.06579	1.05005	0.910506	0.96488	0.840807	0.996333	1.09878	1.07175	0.75983	0.909737	0.967189	0.822235	0.584918	0.846406	0.77896	1.01789	0.933874	0.934544	0.949757
-19.0291	0.829981	0.746311	0.966711	0.994096	0.951226	0.898564	0.927682	0.998933	0.803998	0.929953	0.844687	1.29035	0.86315	1.28765	1.0927	1.17701	1.08279	0.871549	1.21313	0.887554	0.821275	0.860709	0.783246	0.903865	0.861754	0.919911	1.12459	0.987301	0.806128	0.903452	1.03678	0.856329	0.975954	0.832166	0.856286	0.986344	0.918058	0.939407	0.980619	1.03702	0.989663	0.83589	0.620521	1.014	1.10575	1.05135	0.964903	1.05474	0.943768
-18.932	0.781036	0.811418	0.974353	1.05159	1.00032	0.970523	0.925411	1.07333	1.09445	0.884161	0.951069	1.05693	0.995349	1.32266	1.0965	0.943018	1.13174	0.954966	1.22207	0.848842	0.986944	0.740602	0.785404	0.821346	0.731627	0.769786	1.0829	0.93182	0.923707	0.9566	1.24016	1.08204	0.907886	0.917375	0.950592	0.948147	1.00478	0.963157	0.829857	1.07099	0.92288	0.923991	0.598528	0.992158	0.86838	0.965726	1.00644	0.972935	0.930656
-18.835	0.772424	1.0036	0.908684	1.1722	0.940241	0.857205	0.661446	0.935853	1.00005	1.05125	0.878841	1.15423	1.01387	1.23574	1.10545	0.808338	1.07706	1.00737	1.22458	0.899578	1.24126	0.708173	0.775329	0.824604	0.607784	0.648121	1.11618	0.888554	0.836551	1.12539	1.02866	1.29456	0.973103	0.89438	0.800068	0.796551	1.07894	0.987821	0.815454	0.971083	0.922835	0.88514	0.562959	1.14221	1.03594	1.19009	1.03726	1.00785	1.14137
-18.7379	0.812081	0.947443	0.96928	1.12476	0.947447	0.908324	0.625473	1.08773	0.99489	1.02814	1.06071	1.10701	0.965778	1.39845	1.13911	0.928823	1.05526	0.997761	1.2142	1.12921	1.67288	0.774291	0.758947	0.990624	0.61436	0.678355	1.07308	0.962736	0.801841	0.916295	1.09431	1.01653	0.905735	0.874301	1.0966	0.853855	0.907559	0.851876	1.01578	1.03733	0.971048	0.786356	0.525393	0.948965	0.993735	1.05759	1.07956	1.1194	1.07578
-18.6408	0.875872	0.767123	1.09301	0.928334	0.909172	0.879141	0.767653	0.767986	1.08922	0.948274	0.819423	1.1169	0.819042	1.65405	0.996682	0.898054	0.914122	0.914996	1.08756	1.10965	1.46118	0.889683	0.739412	1.23803	0.686145	0.784537	1.15816	1.02761	0.795121	0.996951	0.946968	1.22358	0.950739	0.965844	0.851156	0.938799	0.990204	0.934565	0.977793	1.04142	0.979049	0.995082	0.553012	0.95366	0.953872	1.14258	1.11901	1.09452	0.903206
-18.5437	0.809719	0.807581	1.16531	1.06725	0.958538	0.814137	0.822011	1.09347	1.15048	1.04572	0.819265	1.10015	0.943302	1.22752	0.966649	1.41758	0.895677	0.795655	0.902794	0.965484	0.927812	0.893688	0.68863	1.32258	0.727406	0.744556	1.17146	0.984937	0.882075	0.854407	1.10971	1.15301	1.01594	0.922069	0.855938	0.818186	1.04135	0.807337	0.955588	0.997845	0.929043	0.896959	0.514103	1.0109	0.909845	0.97037	0.972343	1.11916	1.11117
-18.4466	0.755857	0.821689	1.24721	1.08387	0.993076	0.905081	0.680027	0.682667	0.93538	0.983322	0.872499	1.15019	0.907804	1.49317	0.947321	1.06795	1.19844	0.934252	0.79309	0.835661	1.16031	0.894344	0.688949	1.28946	0.860245	0.811779	1.11258	0.978753	1.10738	1.03724	1.1106	1.1247	0.915023	0.886043	0.869959	1.18584	0.957555	1.01437	0.955349	1.05595	0.846607	0.816339	0.59006	0.885393	0.958354	1.01708	1.24512	1.21295	1.03282
-18.3495	0.72658	0.783098	1.34827	0.877464	0.976593	0.797126	0.836998	1.21956	0.892344	1.03948	0.847235	1.10084	1.14035	1.4495	1.00115	1.01371	1.08576	1.02626	0.786847	0.763028	1.26721	0.888303	0.791469	1.02098	1.17625	1.09341	1.03604	1.05579	1.22702	0.910288	0.938232	1.20745	0.940272	0.984939	0.892463	0.951569	0.988254	0.892388	0.942845	1.03723	0.918268	0.926807	0.575454	0.948873	1.03165	1.07084	0.959374	1.10698	1.08031
-18.2524	0.871342	0.791325	1.29652	1.0381	0.957259	0.809776	0.827536	1.04365	1.07776	0.868625	1.04314	1.15012	0.989586	1.33808	0.956136	0.951826	1.11698	1.02508	0.987525	0.804771	1.12291	0.80107	0.810704	0.93869	1.17227	1.12848	1.07812	0.957957	1.04594	0.981328	1.13016	1.17586	0.940778	0.906753	0.72989	1.12081	0.946446	0.968471	0.953435	1.00143	0.871585	0.951023	0.560442	0.73912	0.769226	0.93546	1.17299	0.868335	1.07462
-18.1553	1.10312	0.822961	1.16835	0.863057	0.895582	0.964533	0.670896	0.899034	0.971769	0.9034	0.923695	0.990946	0.919717	1.35472	0.95759	0.945211	0.953435	0.986852	1.14522	0.884736	1.06829	0.673242	0.788295	0.949492	1.0083	1.04028	0.995964	0.929982	1.1367	1.04305	1.03462	1.07767	1.05485	0.925935	0.862525	1.28019	1.04521	0.846266	0.984262	1.06448	0.875545	1.0301	0.571387	1.0293	1.00267	0.894344	0.782707	1.12068	1.09231
-18.0583	0.870397	0.809214	0.900591	0.794521	0.987262	0.870843	0.83315	0.937276	1.13615	0.868949	1.01527	1.22371	0.965505	1.14123	0.918821	1.006	1.10209	0.930106	1.28143	0.983814	1.0585	0.911718	0.762459	0.817839	1.12734	1.18962	1.14787	1.01124	1.14305	0.981353	1.04534	0.996481	0.902403	0.874333	0.885541	1.03964	1.1671	0.892509	0.967535	0.901357	0.917313	0.965535	0.393826	0.980971	1.1375	0.927308	1.04495	0.977623	1.14367
-17.9612	0.723488	0.807415	0.718391	1.02751	0.963788	0.941972	0.933229	0.861362	0.993565	1.02738	1.03974	1.13216	1.07892	1.08172	0.861586	0.886227	1.03981	1.08512	1.23815	0.885121	0.950161	1.02367	0.754389	0.77926	1.19994	1.25889	1.15943	1.03899	0.914937	0.957646	1.11908	1.23875	0.884535	0.93938	0.956831	1.29561	0.911677	0.930136	0.942464	1.0737	0.943268	0.992856	0.560709	1.10131	1.02282	0.824292	1.10565	1.00288	1.21307
-17.8641	0.748213	0.82951	0.707303	1.07979	0.999676	0.87094	0.824044	0.876501	0.857962	1.06727	0.986702	1.07118	0.921279	1.04715	0.891985	0.947824	0.989549	1.15108	1.18383	0.812791	0.898583	0.882569	0.781852	0.926829	1.17962	1.16801	1.19362	0.947008	0.98499	1.1959	1.17552	1.07504	0.905017	0.881131	0.86785	1.07016	0.91238	0.882026	1.00755	0.949868	0.852718	0.823851	0.532639	0.946444	0.986274	1.13666	1.12452	1.02429	0.931952
-17.767	0.726874	0.874428	0.90352	1.03629	0.952344	0.859437	0.743173	0.892265	0.888811	1.01202	0.851552	1.04189	1.03521	1.17648	0.907392	1.28209	1.13815	1.03891	1.10741	0.793185	0.960521	0.85565	0.8428	0.938608	1.14308	1.12685	1.09327	0.922504	1.04099	1.0522	0.867813	1.10246	0.895214	0.861924	0.955327	1.11006	0.793296	0.951267	0.966727	1.03683	0.913028	0.830102	0.512578	0.855663	0.929373	0.945043	1.12933	1.04927	0.982798
-17.6699	0.682504	0.930757	1.20339	0.891295	0.961959	0.925458	0.571731	0.891755	1.01432	0.811662	0.765102	1.0946	1.03757	1.04469	0.85608	1.16478	0.937298	0.950876	1.0916	0.925478	0.996669	0.88582	0.920492	0.882492	1.09843	1.11056	1.12895	0.857097	1.23102	1.0543	1.24964	0.965865	0.881264	0.947342	0.884012	1.09617	0.812809	0.800557	0.852313	0.746364	0.821394	0.76273	0.488939	0.815788	1.08689	0.912366	1.11524	0.979009	0.935768
-17.5728	0.853035	0.913211	0.986254	0.845089	0.961571	0.940652	0.843194	0.994392	1.00012	0.885099	1.15052	1.08283	0.96977	1.10034	0.827836	0.939826	1.07814	0.874905	1.10608	1.13372	1.01992	0.766925	0.834988	0.821726	0.900498	0.922875	1.12794	0.838681	1.16527	0.947631	1.0475	1.21431	0.984437	0.856368	0.756365	0.980737	1.16343	0.898571	0.988926	1.00948	0.833187	0.868589	0.474279	1.01526	0.982588	1.21211	1.04728	1.01243	1.13299
-17.4757	0.971938	0.941814	0.879275	0.89893	1.00736	0.82905	0.935887	0.808749	0.931058	1.1165	0.943879	1.10662	1.02805	1.07953	0.816127	0.952653	0.924522	0.964006	1.20681	0.925803	0.817587	0.68451	0.791554	0.794082	0.814381	0.849794	1.11966	0.920083	1.19355	1.06671	1.04718	1.1144	0.898525	1.06714	1.08507	1.25377	0.880454	0.769465	0.9341	1.10275	0.974768	0.793956	0.484574	0.893505	0.909243	0.991909	0.850816	1.08674	0.871597
-17.3786	0.987586	1.06271	0.99261	0.84506	0.952817	0.887414	0.770666	0.77768	1.03378	0.820747	1.11625	0.95342	0.916885	1.26894	0.850457	1.02773	0.763753	0.991309	1.26116	0.848472	0.767013	0.675054	0.832262	0.832685	0.951887	1.00592	1.05447	0.892199	0.877574	0.882184	0.900412	1.06016	0.979429	0.863641	1.11369	0.994212	1.02869	1.03214	0.952691	1.16643	1.02406	0.933487	0.546037	1.10624	1.01442	0.945382	1.21497	1.00269	1.01581
-17.2816	1.02463	1.10798	1.01623	0.805347	0.97307	0.930655	0.840889	0.733916	0.888668	0.961096	1.09022	0.92738	0.998951	1.24275	0.820026	1.005	1.04556	0.895013	1.22276	1.03232	1.01996	0.736262	0.839759	0.858991	0.965629	0.979958	1.05303	0.943381	0.826056	0.993283	0.993425	0.959995	1.00062	0.882933	1.14097	0.894734	0.874093	0.887748	0.99124	1.23509	0.988684	0.786246	0.456022	0.841394	1.13352	0.997087	1.06189	1.05374	0.994456
-17.1845	1.07237	1.11544	0.994994	0.655255	0.890787	0.851817	0.706663	0.895003	0.931175	0.939903	1.03072	1.0222	0.88795	1.05403	0.799889	0.968056	0.831645	0.869664	1.18886	0.980821	1.12615	0.832803	0.830651	0.879148	0.917487	0.862955	1.04548	0.817327	0.868611	1.00211	1.00385	1.04341	0.941658	0.903839	1.08166	1.06442	1.02618	0.999673	0.859604	1.09423	1.02116	0.803477	0.421347	0.779494	1.13644	1.08428	1.23466	0.981004	1.04333
-17.0874	1.08065	1.10607	0.972238	0.927348	0.9675	0.872843	0.677117	0.897544	0.866211	1.04584	0.929895	0.952837	1.02612	0.840214	0.796819	1.23189	0.789886	0.879788	1.15721	0.811657	1.15897	0.837324	0.872026	0.83042	0.932963	0.909121	1.05355	0.805919	0.881129	1.08741	1.01597	1.10688	1.02942	0.956677	0.930529	1.01794	0.843241	0.858679	0.903804	1.19044	0.927705	0.765062	0.528495	1.05836	1.14261	0.850515	1.15033	1.18163	1.15871
-16.9903	1.043	1.12115	0.945075	0.920093	0.851833	0.865305	0.868998	0.815077	0.952349	0.956374	1.05373	0.852263	0.953046	1.23829	1.02011	1.04175	0.832103	0.954818	1.1038	0.886218	1.12332	0.909997	0.896989	0.806923	0.966516	0.977218	0.925172	0.874099	0.955016	0.944097	1.18438	0.947768	0.871496	0.94942	0.815386	1.03099	0.91456	0.925687	0.998914	0.944673	0.990732	0.726677	0.568446	0.970837	1.05535	0.911634	1.00512	1.00163	1.14806
-16.8932	0.91351	1.1851	0.909097	0.756978	0.898262	0.863781	0.67836	0.836935	0.826045	0.988068	1.13191	0.922948	0.959932	1.06732	1.0655	0.806415	0.909997	1.01786	1.13624	0.928908	0.985395	1.11898	0.889129	0.833888	1.03622	1.08918	1.07264	0.845431	0.943607	0.877045	0.894612	1.16367	0.996601	0.858691	0.935426	1.00818	0.820778	0.843248	1.08086	1.0831	0.890361	0.781429	0.515806	0.966612	1.05681	0.902979	0.989996	1.03146	1.19271
-16.7961	0.923797	1.27436	1.08345	0.956803	0.961102	0.946107	0.669721	0.886105	1.00944	0.904623	0.988647	0.961847	1.07022	1.34331	1.22721	1.07166	0.879942	1.05695	1.34035	0.907861	0.642924	0.979563	0.991138	0.897468	1.03616	1.03712	0.983876	0.806466	0.983922	1.11893	0.991873	0.817133	0.876913	0.82226	1.13126	1.10223	0.956061	0.820597	1.05648	0.977837	0.985846	0.813185	0.54747	1.09344	1.14259	0.95689	1.21359	1.00491	1.13533
-16.699	1.00397	1.37626	1.36298	0.822635	0.913023	0.83369	0.891583	0.795299	0.955086	0.989305	1.08862	0.819718	0.851962	1.16653	1.29273	0.921285	0.88446	0.899677	1.36487	0.94163	0.772079	0.665952	1.14808	0.979355	1.00122	0.903055	0.920043	0.860766	1.01652	0.979641	1.13339	0.837021	1.0073	0.953833	0.797591	0.925971	0.999418	0.865786	0.848419	1.00321	0.906309	0.783701	0.564468	0.800324	0.93666	1.03697	1.02498	1.15577	1.19434
-16.6019	0.994309	1.38016	1.27462	0.875843	0.924683	0.805576	0.709608	0.907688	1.05189	1.16332	1.05651	1.05967	0.879724	0.84941	1.28925	1.01256	0.873528	0.644232	1.29959	1.00281	1.13705	0.765101	1.12035	0.957846	0.837499	0.817082	0.923176	0.88053	0.796929	1.02961	0.90255	1.03817	0.928104	0.999578	0.958556	0.99394	1.02044	0.864649	0.924993	1.07817	0.964545	0.663488	0.56508	0.942249	1.07138	0.845306	1.11659	1.1276	1.11657
-16.5049	0.96235	1.367	1.19738	0.835377	0.878428	0.731852	0.995759	0.735318	1.0608	1.02831	0.864085	0.93449	0.930478	1.00145	1.3526	0.821341	0.816372	0.799966	1.31205	1.01177	1.28081	0.862088	1.11284	0.894726	0.720932	0.75154	1.05983	0.876078	0.911722	1.05374	1.12713	1.07982	0.987252	1.01237	0.991758	0.989672	0.847712	0.957201	0.898555	1.07107	0.979767	0.726101	0.521147	1.1057	1.12934	0.956709	1.21168	1.02753	1.0332
-16.4078	0.885796	1.31971	1.14234	0.957	0.960856	0.848245	0.511644	0.952314	0.975729	0.994195	1.00009	0.958813	1.00175	1.15016	1.32036	0.933074	0.896211	0.91378	1.28047	1.00913	1.32711	0.954752	1.14575	0.748384	0.698666	0.72686	1.03337	0.952433	0.882363	0.952772	0.975066	1.0138	0.88572	0.976898	0.811911	1.02066	1.19229	0.918701	0.867858	1.10661	0.9216	0.807179	0.546951	0.921123	1.13944	0.89258	1.11749	1.07447	1.15792
-16.3107	0.949253	1.27456	1.07216	0.889971	0.888314	0.760257	1.0021	0.806228	0.824022	1.05401	0.747183	0.928975	1.03893	1.45633	1.19653	1.03658	0.930621	0.943754	1.16084	0.983279	1.1785	1.04606	1.11059	0.734161	0.847078	0.838793	1.0368	0.932734	0.86166	1.04078	1.11765	1.02858	0.909961	0.907537	1.01423	1.01239	1.20241	0.889678	0.962383	0.927909	1.0085	0.813129	0.525755	1.07916	1.14353	0.983116	1.02367	1.05194	1.11272
-16.2136	1.08271	1.23047	0.994419	0.851228	0.980133	0.857705	0.81456	0.947724	0.762206	0.83909	0.794719	1.09263	1.06635	1.3727	1.32654	1.10095	0.813605	0.989466	1.14932	1.09946	1.32214	1.1367	1.04138	0.785999	1.08083	1.01903	1.00256	0.96543	0.783803	0.879761	0.948477	1.01444	1.02849	1.12091	0.850566	1.31035	0.935652	1.01638	0.947514	1.05696	1.02517	0.912138	0.518896	0.938545	1.26226	1.15204	1.25984	1.01664	1.12265
-16.1165	1.04112	1.29609	1.0071	0.98279	0.903021	0.822533	1.02355	1.1138	0.997031	0.962692	0.912425	1.00532	0.858277	0.980449	1.21924	0.965229	0.753632	1.04305	1.19185	1.28666	1.61192	0.934485	0.996256	0.687846	1.04711	1.05186	0.953497	0.878036	0.833801	0.924966	0.991226	1.15185	0.935425	0.933399	0.891733	1.17752	0.968377	0.961158	0.936556	0.969795	0.960272	0.944276	0.525583	1.1335	1.17436	0.827726	1.14416	1.08019	1.01129
-16.0194	0.978963	1.33928	1.02923	0.906961	1.02573	0.84411	0.967707	0.757637	1.12834	0.991232	0.838898	1.03636	0.903601	0.589202	1.30087	0.894841	0.823547	0.863431	1.11817	1.22257	1.39275	0.81265	0.947865	0.7378	1.05256	1.10735	0.93456	0.889099	1.02323	0.910921	0.892783	1.00887	0.927893	0.819304	1.05227	1.10617	1.06302	0.920374	0.906554	1.10065	0.906168	1.05896	0.504432	0.927737	1.09374	1.19689	1.2486	1.15297	1.04179
-15.9223	0.875681	1.33763	1.07027	0.925633	0.977673	0.881084	0.899288	0.849865	0.993874	0.987349	0.988304	0.937137	0.87336	1.1547	1.33396	1.06196	0.748588	0.724673	1.00642	1.25173	1.14068	0.851577	0.892938	1.08397	1.13633	1.20816	1.00251	0.848856	0.726391	0.701364	1.06816	0.860923	0.845231	0.889866	1.05467	1.03221	0.953465	0.817138	0.912257	1.06692	0.928069	0.745516	0.56323	1.02737	1.19802	1.06588	1.19537	1.00231	1.1927
-15.8252	0.899135	1.30576	1.03907	1.04055	0.958733	0.797148	1.25541	0.789168	0.816311	0.853547	0.895199	0.993703	1.0302	1.01697	1.06443	0.947614	0.802809	0.667633	0.818528	1.46741	0.822832	0.81918	0.981596	1.04202	1.0529	1.0986	0.985409	0.833949	0.947088	0.750117	0.798625	0.997896	0.923429	0.955839	1.01916	1.21014	1.27247	0.980328	1.0202	0.929076	0.900802	0.867121	0.600706	0.981788	1.07147	0.928889	1.37579	1.07134	1.02247
-15.7282	0.985957	1.25877	0.971742	0.911377	0.996831	0.828179	0.919316	0.932429	0.939324	1.00079	0.922993	0.944573	0.971233	0.943887	1.19808	0.789665	0.875472	0.671329	0.87822	1.32727	0.841569	0.751119	1.14205	0.806	0.885861	0.88385	0.908258	0.851799	0.823087	1.08394	0.965309	1.13081	0.94673	0.866287	0.829358	1.07126	0.725096	1.10803	1.03115	1.06039	0.886052	0.697296	0.597463	1.02605	1.3542	0.896534	1.19085	1.05232	1.17078
-15.6311	1.00413	1.18203	1.02578	0.901319	0.918749	1.06247	0.899151	1.00063	0.747106	0.936979	0.864584	1.02711	0.89046	0.975461	1.2397	0.872014	0.730981	0.705393	1.0617	1.00922	1.0286	0.808492	1.02625	0.962928	0.952853	0.913247	0.894118	0.979295	0.849047	0.866884	1.03013	0.926848	0.891797	0.829012	0.987776	0.911041	1.01838	0.997903	0.979757	1.11683	0.823534	1.04128	0.55598	1.22222	1.0998	0.854245	1.16509	1.02146	1.11309
-15.534	0.987533	1.12396	1.04072	0.894674	0.885509	0.894696	1.07135	0.717502	0.803914	1.0358	1.08436	0.991111	1.08205	1.59436	1.08869	1.25622	1.14219	0.870942	1.11744	1.02989	1.04995	0.857329	0.952691	1.00346	0.977834	0.919192	0.95793	0.83794	0.763086	0.904347	0.845447	0.770534	0.905163	0.779791	1.07142	0.77769	0.886969	0.96878	0.856603	1.00363	0.786674	0.578792	0.563137	1.25126	1.08434	1.07311	1.14037	0.997484	1.1651
-15.4369	0.901395	1.10322	0.97743	0.861582	0.905292	0.941248	0.839006	0.757874	1.04237	1.00432	0.967315	0.913776	1.08205	1.59436	1.08869	0.845013	1.29353	0.951672	1.06443	1.03181	1.03219	0.889097	0.963588	0.811199	0.918792	0.878235	0.963126	0.938125	0.876437	0.783975	0.865735	0.906382	0.867748	0.881363	0.912284	1.0892	1.13461	0.848091	1.10817	0.870301	0.875736	0.783086	0.494866	0.940893	1.16106	1.01679	1.05499	0.950137	1.17698
-15.3398	0.820101	1.24924	0.837061	0.956917	0.979482	0.886112	0.965595	0.894346	0.80008	0.89728	0.873673	0.962292	0.944337	1.53669	1.07011	1.5235	1.23626	0.862762	0.793918	0.996258	0.936221	0.885102	0.911129	0.738044	0.852992	0.853762	0.882859	0.904411	0.888859	0.805423	0.980373	0.977624	1.04791	0.910956	0.900382	0.959691	1.0046	0.975547	0.976671	0.917653	0.883255	1.15176	0.474966	0.875911	0.950591	0.938227	1.11017	1.04532	1.03163
-15.2427	0.741229	1.47864	0.658152	0.84866	0.913302	0.947133	0.815085	0.861069	1.12443	0.890654	0.82126	0.928364	0.816146	1.69876	1.13487	1.28886	1.2099	0.835177	0.760125	1.16501	0.86042	0.863227	0.826991	0.724441	0.783814	0.83753	0.903065	0.924522	0.853601	0.819781	0.970805	0.913326	0.905145	0.938196	0.815952	1.1101	0.929946	0.880482	0.945053	0.889077	0.803881	0.725194	0.521873	1.00256	0.883353	0.918127	1.15114	0.937057	1.13202
-15.1456	0.827614	1.4013	0.972323	0.774424	0.950226	0.82175	0.906089	0.783605	1.00279	1.002	1.04449	0.86904	0.811609	1.5544	1.11426	1.22243	1.24931	0.838254	0.844689	1.43593	0.794705	0.744033	0.901826	0.689582	0.852338	0.87147	0.896139	0.90493	0.725985	0.878791	0.948297	0.973483	0.843688	0.925556	1.16099	1.4099	0.867266	0.919609	0.952805	0.850654	0.835227	0.839465	0.55297	1.19776	1.18516	0.981608	1.12798	1.01518	0.980031
-15.0485	0.941222	1.33903	1.1467	0.895334	0.908731	0.894768	0.714482	0.977703	0.815093	0.963549	1.01625	0.889062	1.07283	1.37593	1.0265	1.44286	1.22156	0.764721	1.05237	1.11829	1.09067	0.685751	0.913911	0.713202	0.879825	0.873002	0.904686	0.872884	0.756664	0.873165	0.792409	0.934774	0.962779	0.974536	1.00886	0.893451	0.962815	0.947672	0.937466	0.867098	0.893162	0.879878	0.66966	0.839863	1.17128	0.980605	1.22645	0.987688	1.16566
-14.9515	1.10928	1.30689	1.0415	1.03476	1.01964	0.854056	0.944345	0.828135	0.851238	1.02607	0.972384	0.989204	1.11293	1.85287	1.147	1.52306	1.29843	0.746709	1.15277	0.857531	1.19701	0.749291	0.800498	0.853779	0.825238	0.80972	0.84269	0.927525	0.916116	0.893814	0.855537	0.711314	0.933455	0.867085	0.809481	1.2042	0.949967	0.880104	0.954037	0.988714	0.83901	1.04078	0.598611	0.930911	1.14607	0.90037	1.0399	1.06763	1.16359
-14.8544	1.16983	1.38857	1.15757	0.804729	0.947461	0.813137	0.803375	0.994607	0.795079	0.803932	0.995494	0.900714	0.978751	1.39974	1.25092	1.14358	1.30454	0.839743	1.03865	0.710511	0.924096	0.745586	0.761228	0.888487	0.851486	0.84947	0.893147	0.73658	0.910953	0.881101	0.836911	0.987373	0.903352	0.830135	1.15799	0.958243	0.924145	0.899796	0.894019	0.972443	0.768045	0.673488	0.62	0.978553	0.923195	1.0554	1.08065	1.01849	0.921083
-14.7573	1.17663	1.52717	1.38427	0.92748	1.05587	0.941983	0.788721	0.837612	1.00916	1.09345	0.992448	0.888672	0.979296	1.73237	1.27505	1.45877	1.30847	1.06053	0.938269	0.923085	1.02458	0.708258	0.75903	0.870262	0.918153	0.940736	0.94982	0.775108	0.871447	0.744006	1.02154	0.839663	0.939698	0.83444	1.13537	1.01833	1.12431	1.02525	1.13068	0.858799	0.78455	1.03958	0.540901	1.068	0.841551	0.978562	1.02618	0.967065	1.25634
-14.6602	1.16894	1.45741	1.18101	0.897756	0.929293	0.977439	0.904251	0.882916	0.739874	0.971952	0.76448	0.90258	1.08316	1.10996	1.19873	0.922422	1.23867	1.3452	0.844768	1.31546	1.31176	0.658849	0.749631	0.806563	1.04865	0.998809	0.89108	0.862166	0.853232	0.880583	0.91079	1.04865	1.03484	0.893962	0.957155	1.17474	1.11305	0.8739	0.917452	0.889914	0.77477	0.907252	0.53056	1.03849	0.948123	0.944155	1.24247	0.984891	1.16716
-14.5631	1.15385	1.37614	1.04975	0.945651	0.935457	0.928267	0.898911	0.952884	0.9714	1.01622	0.986038	0.885946	1.15181	1.35194	1.23365	0.836629	1.31187	1.23788	0.897636	1.09114	1.11642	0.656043	0.770013	0.733668	1.14899	1.07731	0.907437	0.931426	0.866102	0.915477	1.07482	0.784857	0.910815	0.962986	0.919136	1.20158	1.09631	0.977673	0.969321	0.882396	0.861431	0.93688	0.58954	0.961765	1.15719	0.892045	1.41517	1.02916	1.06854
-14.466	1.12398	1.27185	1.06249	0.871996	0.920901	0.710499	0.724628	0.905608	0.919082	0.96055	1.00124	1.01006	1.11601	1.46511	1.18528	0.944249	1.35431	1.14804	0.947326	1.04862	0.968919	0.746444	0.84996	0.64238	1.18905	1.19668	0.878644	0.899385	0.915854	0.899605	1.02315	0.896352	0.917621	0.990403	1.03233	1.3452	0.989282	0.866278	0.948172	0.853598	0.905706	0.835518	0.518664	1.05946	1.01954	1.00918	0.989069	0.963766	0.948044
-14.3689	1.09612	1.39741	1.0824	0.958117	0.86896	0.870308	0.611401	0.899573	0.938116	1.12986	0.825753	0.942207	1.0418	1.44278	1.0332	1.50944	1.31887	1.09315	0.990659	1.36969	0.917112	0.764609	0.928203	0.604102	1.19219	1.21416	0.873914	0.978229	0.882928	1.09092	1.04169	1.12135	0.98404	0.925962	0.82335	1.11786	1.01238	0.91226	0.905753	0.914286	0.781868	1.05499	0.484614	0.790396	0.922093	0.86877	1.23013	0.970693	0.967689
-14.2718	1.06927	1.6379	1.10588	0.965435	0.900952	0.863298	0.657281	0.856909	0.96863	1.09153	0.804456	0.742089	1.10905	1.51892	1.21078	1.12314	1.48882	1.06281	1.0105	1.26248	0.915581	0.746657	1.00559	0.592329	1.17688	1.18071	0.852499	0.854628	0.951098	1.04105	1.06294	1.13215	0.944698	0.919411	0.742196	1.0855	0.815035	1.21969	0.874886	0.984253	0.859384	0.964293	0.515399	1.0166	1.10222	0.938276	0.920047	0.982	1.05784
-14.1748	0.899319	1.49067	0.995472	0.869939	0.91022	0.843917	0.691165	0.898799	0.907635	0.924671	0.874383	0.797585	1.06817	1.82873	1.10062	1.15047	1.27374	1.04475	1.0186	0.941127	0.939187	0.796533	0.909808	0.598235	1.10039	1.0994	0.936953	0.83003	1.13036	1.22389	1.07142	1.16755	0.8894	1.04813	0.900881	1.11168	0.899903	1.03528	0.871681	1.1236	0.802735	0.938229	0.629029	1.14721	1.21217	0.924426	1.11017	0.916251	1.17495
-14.0777	0.786115	1.39768	0.947452	0.915796	0.908253	0.912299	0.690069	0.942523	0.979944	0.861245	0.826848	0.837771	0.897154	1.57061	1.07752	1.24426	1.24809	1.01895	1.05656	0.952487	1.05346	0.803141	0.864468	0.633334	1.11531	1.09714	0.919299	0.849522	0.960423	0.998649	1.24485	1.00885	0.934632	0.96011	1.02725	1.09024	0.968311	1.01563	1.04736	0.883714	0.834505	1.02653	0.605935	1.01852	0.976005	0.916926	0.97406	0.9349	0.957126
-13.9806	0.786398	1.41315	1.02421	0.828614	0.889577	0.968977	0.81376	0.868102	1.01316	0.858899	1.08822	0.851472	1.03652	1.60691	1.14883	1.28045	1.13575	0.973769	1.05381	1.01623	1.05754	0.723214	0.920021	0.726821	1.31305	1.25296	0.9392	0.968592	0.948866	0.92788	1.0409	0.956552	0.880295	0.972564	0.954736	0.96777	0.902567	0.947242	0.941495	0.941267	0.817127	0.750982	0.644098	1.05458	1.06044	0.843113	1.24576	0.912641	1.09232
-13.8835	0.846958	1.33667	1.1477	0.925871	0.936459	0.834203	0.726693	0.967128	0.983232	1.07586	0.806856	0.917563	1.18143	1.41824	1.05559	0.804146	1.27737	0.889807	0.969638	1.18475	0.841208	0.751581	1.04829	0.653287	1.19152	1.16826	0.866361	0.944486	1.09107	1.09599	0.984672	0.918081	0.924504	0.94814	1.048	0.928206	0.862939	0.963731	0.95952	0.991634	0.864069	0.993738	0.50648	1.09284	0.967986	0.89837	1.2722	1.01186	1.0129
-13.7864	0.937655	1.21421	1.29455	0.886366	0.970404	0.854915	0.608253	1.12072	0.964148	0.96238	0.777686	1.0185	1.05931	1.15345	1.03025	1.27389	1.31061	0.923534	0.97043	1.11263	0.781703	0.834096	1.21291	0.496241	0.910355	0.963316	0.88697	1.16031	1.03137	0.958929	1.06228	0.924956	0.983117	0.984186	0.995544	1.11201	0.732619	0.964148	1.01418	0.879498	0.768014	0.974064	0.488145	1.13687	1.09028	0.966861	1.10572	1.10135	1.04851
-13.6893	0.996957	1.20952	1.3835	0.844504	0.961245	0.901961	0.781942	0.899367	0.89127	0.978786	0.786276	0.981324	1.00069	1.72038	1.08132	1.15778	1.53736	1.0161	1.0137	0.920189	0.800609	0.840321	0.916122	0.565383	0.889106	0.927022	0.93069	0.859509	1.10935	1.09372	0.987664	1.14194	0.939782	1.04279	1.02295	1.12173	1.04112	0.911476	1.13485	1.03683	0.813236	0.844504	0.468043	1.04942	0.986215	1.11913	0.952303	1.02387	0.955766
-13.5922	1.00834	1.27063	1.36662	0.803279	0.941028	0.866747	1.05994	0.782398	0.925729	1.09157	0.885453	1.08848	1.16653	1.27582	1.01941	1.46629	1.35386	1.00835	0.962233	0.863387	1.01001	0.854538	0.76562	0.579248	0.901202	0.916244	0.832645	0.916204	0.829147	1.02346	1.07181	1.10947	0.884555	0.927378	0.873025	1.0812	1.0427	0.821544	1.06391	0.947052	0.89025	0.860904	0.517157	0.932196	0.78284	0.826013	0.89814	0.966072	0.978114
-13.4951	0.923894	1.46332	1.13809	0.990249	0.939001	0.784381	0.766318	0.993772	0.968236	1.0521	0.897133	1.00098	1.20209	1.53836	0.997214	1.28726	1.49355	1.00191	0.923276	0.887466	1.08515	0.884738	0.907692	0.482557	0.979992	0.956499	0.891846	1.05909	0.818203	0.811132	0.99051	1.0256	0.848977	0.934666	0.979731	1.36178	0.953876	0.964753	0.948688	0.889763	0.754847	0.860798	0.597843	0.880206	0.800284	0.805868	1.20647	1.00818	1.0644
-13.3981	0.888832	1.54261	1.0524	1.00401	0.952635	0.85963	0.723748	0.979842	0.842092	1.22036	0.944616	1.09684	0.911455	1.44114	1.10232	1.13906	1.35912	0.998082	0.90934	1.07331	0.891805	0.808527	0.914537	0.52433	0.854459	0.84224	0.848064	0.953124	0.771024	0.991354	0.884466	0.905018	0.899082	0.911287	0.926927	1.06533	0.887682	1.04125	0.916705	0.985367	0.831177	0.827956	0.502786	0.833942	1.05046	0.804681	0.855301	0.974345	1.03863
-13.301	0.878464	1.56522	1.03814	0.987233	0.921261	0.923702	1.02402	1.02194	1.07886	0.871139	0.872702	1.02576	1.00389	1.48808	0.967262	1.13545	1.25387	0.987611	0.88728	0.986303	0.911443	0.67911	0.853768	0.635335	0.626765	0.650723	0.91981	0.968589	0.945904	1.01794	0.87303	0.817542	0.911614	0.971932	1.08067	1.21833	1.05969	0.976718	0.91103	1.05738	0.858545	0.74728	0.501816	0.878279	1.03828	0.832657	0.922781	0.976734	0.88768
-13.2039	0.855114	1.40577	1.19551	1.11365	0.91754	0.862013	0.579388	0.915731	0.893377	1.16362	0.957883	1.02593	0.88836	1.97062	1.01862	1.04279	1.15963	0.973816	0.861158	0.762876	1.03758	0.647616	0.689519	0.637414	0.636625	0.646215	0.845903	0.917419	0.819073	0.975417	0.863321	0.862815	0.90211	1.00143	0.9646	0.957742	1.12853	0.927867	1.06374	1.01055	0.825536	0.929967	0.38773	1.02519	1.03982	0.910596	1.15381	0.960318	0.960126
-13.1068	0.823083	1.31206	1.23447	0.87805	0.918258	1.03638	0.719059	0.77254	0.960608	0.939457	1.0335	1.04867	1.04607	1.63747	0.932806	1.14795	1.04135	1.00519	0.772773	0.90096	0.942455	0.639313	0.6267	0.653183	0.66567	0.67361	0.917839	0.943147	0.927369	1.00419	0.914301	1.07611	0.966946	0.978592	0.900856	1.01114	1.0598	1.00866	0.939039	0.870001	0.860829	0.828864	0.510076	0.923634	0.91528	1.00726	0.848428	0.928497	1.09568
-13.0097	0.773692	1.34984	1.03663	1.08357	0.964915	0.947212	0.704758	0.794798	0.855343	1.07453	0.97785	1.01585	1.17182	1.60276	0.915451	1.31057	1.28992	1.00167	0.760128	1.0137	0.922667	0.677393	0.766739	0.696332	0.733089	0.764811	0.885762	0.926812	1.09144	0.951447	0.850041	0.970408	1.0216	0.865721	1.20946	1.06883	1.02657	1.03205	0.996219	0.852406	0.869454	0.738107	0.536436	0.971122	1.19398	0.888126	0.877334	0.998331	0.98992
-12.9126	0.751488	1.36122	1.05694	0.846829	1.01875	0.753628	0.708079	0.866934	1.15426	1.06608	1.01187	1.21798	0.983333	1.27805	0.949537	1.01581	1.25672	0.928366	0.898961	1.07575	1.05355	0.683512	0.824425	0.7891	0.840093	0.87561	0.860504	1.00153	0.973075	0.807751	1.06303	0.914528	0.869529	0.947904	1.0082	1.11222	0.880351	0.910415	0.839054	0.89701	0.849668	0.744638	0.628906	1.04628	0.872401	0.795006	0.867679	0.900615	1.03205
-12.8155	0.742876	1.3594	1.18632	0.845462	0.989837	0.908295	0.653595	0.847186	1.02869	1.01081	1.03297	1.08917	1.00458	1.33291	1.01178	1.27641	1.41636	0.933962	0.809775	1.10426	1.06461	0.67365	0.840933	0.906678	0.966889	0.996208	0.883573	0.928501	0.740527	0.935776	0.719178	0.915141	0.961946	0.911035	0.841919	0.983239	1.03889	0.96816	1.04097	0.875255	0.861984	1.00967	0.584079	1.11657	1.11712	1.00358	0.997137	1.02801	0.985458
-12.7184	0.850135	1.26771	0.953636	0.794889	0.995483	0.863083	0.884896	0.932067	0.83087	0.99255	0.921294	1.13733	1.14905	1.23189	0.950882	1.14274	1.21034	0.97901	0.606581	1.11599	1.01577	0.727525	0.813512	0.845929	0.996425	0.975142	0.997879	1.08144	0.702635	0.92144	0.853268	0.847528	0.930226	0.870614	0.802835	1.18923	0.99376	0.8442	0.977613	0.925779	0.817539	0.914038	0.686985	0.858909	1.08238	0.83424	0.927442	1.03966	0.956662
-12.6214	0.910171	1.2368	0.856216	0.877319	0.913852	0.83576	0.735869	0.92154	0.995452	1.11579	1.08011	1.11884	1.05342	1.74398	0.849193	1.14022	1.28714	1.03106	0.793873	1.16079	1.12134	0.803912	0.786646	0.810131	1.03438	0.997088	0.962809	0.93753	0.924973	0.866023	0.680167	0.936195	0.962337	0.96827	0.970505	1.32349	0.94948	0.999045	1.00101	0.924713	0.797259	0.948941	0.615663	0.986176	1.1623	1.04999	1.14409	0.924866	0.897105
-12.5243	0.875759	1.32749	1.02932	0.884493	0.933523	0.929111	0.686006	0.784715	0.997198	1.03068	0.944152	1.06895	0.970667	1.22158	0.782031	1.34878	1.16187	1.01128	0.878427	1.15372	1.11438	0.92532	0.760893	0.824235	1.08918	1.10506	0.949061	1.12166	0.814076	0.821184	0.654537	0.950229	0.986875	0.950137	0.808751	1.07613	0.866818	0.939688	0.829521	0.966025	0.857756	0.966957	0.576056	0.871676	1.03145	1.12294	1.04082	0.97642	0.988095
-12.4272	0.877722	1.37455	1.04032	0.833771	1.03325	0.898742	0.923414	0.89259	0.854436	0.982213	0.847129	1.10486	1.13413	1.38044	1.00757	1.13714	1.16221	0.847842	0.757504	1.0429	0.882374	0.909416	0.805171	0.905238	1.09423	1.1248	0.970349	1.02793	0.733458	0.780106	0.726895	0.875664	0.991606	0.931024	0.866752	1.3234	0.9167	0.873429	0.954437	0.935036	0.800884	0.938962	0.595974	0.901824	1.18032	1.01259	0.950541	1.02778	0.817677
-12.3301	0.897871	1.39981	0.970268	0.833511	0.98426	0.853437	0.880422	0.82365	0.957234	0.909976	0.942846	1.1154	1.05006	2.05979	1.10799	1.32042	1.12269	0.807925	0.752889	0.988264	0.919443	0.824858	0.884466	1.01969	1.0744	1.10043	0.920601	0.97821	0.671104	0.858516	0.751357	1.01846	0.818751	0.968807	0.848924	0.971471	0.948112	0.960553	1.07261	0.891971	0.766049	0.655404	0.474366	1.05237	1.1851	0.904231	0.82797	1.07989	1.06577
-12.233	0.929073	1.37344	1.20524	0.840137	0.881294	0.799709	0.698766	0.870448	0.939233	0.997845	0.957499	1.19306	1.16366	0.970166	1.09677	1.34295	1.29835	0.829769	0.806428	0.961724	1.09105	0.796168	0.808691	0.990896	1.06712	1.11236	0.953768	1.08383	0.885646	0.750273	0.944455	1.00456	0.982447	1.09207	0.939223	1.12257	0.939057	0.968152	0.941822	1.03364	0.807121	0.867879	0.448126	1.04306	1.20213	1.1699	0.901027	0.95145	0.972384
-12.1359	0.949085	1.35151	1.25063	0.642057	1.02015	0.852541	0.835457	0.706869	1.04104	0.911506	1.02558	1.04334	1.05473	0.961088	1.39623	1.32095	1.33454	0.923584	0.782103	0.931018	0.991489	0.760343	0.770062	1.00495	1.04413	1.07446	0.890617	0.962251	0.771034	0.857885	0.891488	0.880614	0.902722	0.90141	0.817248	1.10644	1.0055	0.78501	0.848147	0.879826	0.756912	0.638012	0.553724	0.913692	1.08061	0.974091	1.02738	0.950844	1.12968
-12.0388	0.946714	1.33845	0.916852	0.776154	0.917557	0.925302	0.836951	0.746768	1.15237	0.907223	1.14894	1.13542	1.07439	1.22338	1.43878	1.54925	1.21697	0.973441	0.72279	0.965532	0.863546	0.710249	0.805724	1.10468	0.98976	0.936906	0.941498	1.04019	0.848706	1.05688	0.787326	0.975468	0.880157	1.03879	0.899769	1.08163	1.10855	1.02463	0.880549	0.819256	0.770095	0.866651	0.501943	1.1123	1.25021	1.03153	1.00163	0.968058	0.877587
-11.9417	0.829932	1.54581	0.976489	0.871751	0.978351	0.804737	0.828952	0.938334	0.973086	1.09048	1.03992	0.98322	0.950276	1.19898	1.3576	1.25778	1.27486	0.935384	0.593501	1.13048	0.678842	0.719529	0.858331	1.08106	1.00016	0.941	0.870785	1.13315	0.907485	0.793575	0.764993	0.880291	0.900324	1.02979	1.04035	0.967718	0.908968	1.13523	1.01342	0.983729	0.789519	0.796386	0.598582	0.854989	1.16007	1.01208	0.813865	0.896545	0.9682
-11.8447	0.655944	1.86337	1.23283	0.876911	0.94834	0.796566	0.766763	0.917282	1.10661	1.13215	0.988348	1.08667	1.03284	1.25149	1.48391	1.06022	1.43803	1.01625	0.595775	1.14655	0.787339	0.758496	0.91941	0.995772	1.04294	1.01592	0.866727	1.03301	0.719653	0.809605	0.891569	0.898235	0.911933	1.0766	1.02644	1.19129	0.884325	0.823829	0.812595	0.825084	0.773282	0.734247	0.576816	0.922939	1.12512	0.986771	1.10592	0.990009	1.004
-11.7476	0.711131	1.40613	1.07941	0.919515	0.986951	0.884153	0.759494	1.0239	1.00562	0.846274	1.09983	1.01342	0.840632	1.1737	1.30389	0.924787	1.36227	1.15657	0.66383	1.08817	1.04244	0.890338	0.977877	1.04805	1.13537	1.17926	0.91797	1.04113	0.895751	0.849041	0.964924	1.1135	0.937997	1.03339	0.899608	0.961572	0.777242	0.958307	1.08741	0.764105	0.736553	0.73806	0.541238	1.01854	1.0417	1.03304	0.859984	0.942793	1.00807
-11.6505	0.77655	1.20083	1.03785	0.757994	0.981871	0.88689	1.01403	1.11699	0.975957	1.02274	0.974925	1.12459	1.00575	1.17614	1.26596	1.01	1.26996	0.940379	0.68563	0.902031	1.08116	0.970979	0.986434	1.07192	1.22115	1.30459	0.943487	0.893686	0.945055	0.839098	0.883724	0.892543	0.983153	0.953547	0.932567	0.99493	1.19582	1.04918	0.928645	0.78474	0.739603	0.695846	0.530491	0.973387	0.966155	0.987955	0.866638	0.861286	0.959368
-11.5534	0.862431	1.49939	1.22003	0.975503	1.0057	1.01189	0.935101	0.736251	0.958535	0.966132	0.981833	1.02255	1.06516	1.67582	1.36216	0.946634	1.15596	0.85671	0.743296	0.857969	1.05197	0.94922	0.895171	1.039	1.29362	1.35389	0.908822	0.83102	0.801729	0.756501	0.88385	1.10179	0.847309	0.966376	0.882599	1.13711	1.1798	0.891032	0.991704	0.973076	0.815273	0.933423	0.573182	1.21349	1.1446	1.06108	0.967893	0.942193	0.859311
-11.4563	0.871441	1.38415	1.22108	0.986732	0.944294	0.953457	1.15716	1.06999	1.23181	1.00562	1.07281	1.04936	1.0432	1.57705	1.30077	1.29815	1.06808	1.0381	0.872696	1.09805	0.886978	0.934888	0.905603	0.960056	1.1737	1.20463	0.910642	0.917327	0.756488	0.869518	0.901488	0.842057	0.906734	0.996943	0.954168	0.955583	0.844677	0.884895	0.989546	0.799228	0.852554	0.854063	0.457034	1.11354	1.07991	0.929549	0.926896	1.00361	0.981159
-11.3592	0.842014	1.06202	1.13158	0.861404	0.942971	0.939796	0.868497	0.969425	1.13273	1.09421	0.977009	1.07954	0.901655	1.48317	1.34766	1.20805	1.14061	1.11202	0.856905	1.06238	0.85015	0.92427	0.966882	0.858105	0.957589	0.956079	0.968957	0.886024	0.911733	0.809453	0.872889	1.10643	1.0256	0.850747	0.980286	1.06868	0.97282	0.995011	0.945813	1.03635	0.812247	0.768642	0.41213	0.981553	1.08761	0.948698	0.939844	1.06114	0.925489
-11.2621	0.926526	1.12313	0.889186	1.00777	0.969748	1.01763	1.06726	1.09786	1.06329	1.06572	1.02465	1.16028	0.925878	1.42209	1.28273	1.1206	1.08022	1.13223	0.768519	0.888837	0.877406	0.83889	0.930549	1.06101	0.978087	0.976772	0.944696	0.919641	0.909758	0.669621	0.845348	0.954865	0.909688	0.979124	0.822921	0.986357	0.924858	0.989177	1.03337	0.791945	0.834672	0.850883	0.584291	1.05548	1.03168	1.02486	0.840685	0.960049	0.866405
-11.165	1.03105	1.1542	0.768882	0.840858	1.037	1.08937	0.766044	0.887398	1.02427	0.916702	1.01693	1.20118	0.987621	1.3403	1.14348	1.03923	1.1424	0.963841	0.78164	0.954675	0.86869	0.817431	0.839548	1.11717	1.08394	1.08869	0.876397	0.936759	0.940004	0.763527	0.959664	0.915439	0.936388	1.02727	0.863464	0.923666	1.10168	1.03792	0.987822	1.05712	0.779432	0.709608	0.508902	0.753531	1.18561	0.937469	0.836583	0.969898	0.948211
-11.068	1.17562	1.12523	0.89275	0.984451	0.943518	0.933284	1.12526	0.687002	0.979288	1.053	0.937978	1.09833	1.18647	1.27273	1.17878	1.12214	1.00256	0.852075	0.855282	1.10471	0.879424	0.923811	0.639213	0.879807	1.36052	1.38306	0.919511	0.939669	0.77096	0.80103	0.792297	0.852206	0.9473	1.13854	1.00047	0.925443	1.0823	1.05753	0.899003	0.967427	0.803524	0.984396	0.588722	1.05413	1.0833	1.05042	0.836002	0.869967	0.841435
-10.9709	1.28738	1.23728	0.833908	0.797061	0.951506	0.966388	0.833903	0.815459	0.990829	0.885416	0.766896	1.27137	1.01383	1.19368	1.19594	1.34382	1.10524	0.853544	1.04996	1.42313	0.929057	0.9226	0.67766	0.881191	1.23008	1.23615	0.937694	1.0769	0.802561	0.615447	0.742806	1.02605	1.0469	1.16862	0.793295	1.16973	0.97437	0.884056	0.952888	0.809336	0.735026	0.798605	0.585905	0.852456	1.03331	1.02764	1.0235	0.984937	0.987004
-10.8738	1.38274	1.41984	0.683711	0.889536	0.938376	0.955174	0.826235	0.988545	0.968513	0.943292	0.92014	1.2968	0.914268	1.11652	1.23782	1.05671	1.28126	0.837607	1.08245	1.37876	0.834204	0.867593	0.835498	1.00195	0.896117	0.868613	0.910067	0.966829	0.764517	0.75727	0.750847	0.736416	0.912386	1.23569	0.981779	0.888249	1.23304	0.963338	0.989923	0.988888	0.863356	0.811043	0.587499	0.951323	1.19414	0.786205	0.855023	0.926337	1.09247
-10.7767	1.82202	1.36956	0.834503	0.803551	0.931588	0.870269	0.810029	0.982835	0.990609	1.07609	0.861606	1.44089	0.906459	1.47991	1.11532	0.984192	1.22806	0.812967	1.03384	1.15299	0.667108	0.946065	0.885934	0.9541	1.00465	0.957031	0.920496	0.857378	0.705406	0.786136	0.654516	0.802317	1.14599	1.03291	1.01599	1.22361	1.20186	0.90461	0.989217	0.878373	0.809634	0.851205	0.471863	0.970062	1.09762	1.07664	0.8096	0.871563	1.0124
-10.6796	2.02102	1.26048	0.959374	0.853719	0.958979	0.986734	0.898283	0.87649	1.02938	0.753472	1.04532	1.26302	1.00271	1.2508	1.12801	1.00123	1.13084	0.898185	0.945032	0.988293	0.983883	0.998099	0.916956	0.929466	1.01257	0.953066	0.913516	0.96703	0.644385	0.720692	0.908642	0.934431	1.13757	1.00007	1.05455	1.13961	1.29491	1.05261	1.01704	0.901032	0.816476	0.825729	0.499059	0.917388	0.832918	0.923481	0.863484	0.962218	1.11515
-10.5825	1.73945	1.03382	1.0324	0.89585	0.998101	0.961342	0.641246	1.24175	1.05049	0.990109	0.891381	1.24422	1.04745	1.2801	1.08841	0.870708	0.990019	0.972504	0.929777	0.951003	1.12383	0.997255	0.909151	0.95126	0.819237	0.764332	0.941937	0.89002	0.742929	0.83946	0.819333	0.871837	0.948658	1.04801	1.15975	1.21548	1.24627	0.979973	0.929238	0.800096	0.825976	1.04993	0.540518	0.961468	0.947926	0.785728	0.867077	1.05346	0.995158
-10.4854	1.68798	1.06546	0.984346	0.905087	0.91989	0.960779	0.739349	1.09436	0.888426	1.08107	0.993918	1.32067	0.924123	1.52069	1.17894	1.02379	1.3104	1.02502	1.06162	1.16854	0.910124	1.00922	0.907164	1.07926	0.841389	0.818721	0.932956	0.915345	0.666475	0.702274	0.941528	0.920475	1.06386	0.917119	1.00257	0.984776	1.13947	1.03544	1.05292	0.873088	0.834606	0.717043	0.601982	0.860011	0.980142	1.00233	0.903659	0.935787	1.01563
-10.3883	1.75155	1.22625	0.875743	0.857714	1.01289	1.04078	0.812905	0.803696	1.01729	1.13772	1.07837	1.20272	0.995716	1.1502	1.0798	1.35965	1.22175	1.03939	1.0664	1.1281	0.977424	1.02759	0.908086	1.26037	0.97128	0.994672	0.944308	0.958387	0.759675	0.792952	0.846436	0.949608	1.00639	1.11556	0.967437	1.14034	1.11373	1.18574	0.863209	0.846542	0.905436	0.890968	0.534629	0.892791	0.988243	1.02226	0.893747	0.928872	0.862153
-10.2913	1.4848	1.37494	0.758235	0.879955	0.958646	0.828324	1.03615	0.964587	1.04865	0.945752	0.856517	1.31246	0.942192	1.01591	1.11046	0.8524	1.0285	1.03467	1.00765	0.958677	1.18523	0.996735	0.926072	1.12435	1.18645	1.11085	0.947576	1.03616	0.761041	0.841116	0.926392	0.68242	1.17101	1.08131	1.10889	1.05584	1.32896	0.997275	1.12246	0.872571	0.837952	0.617486	0.54772	0.984167	0.991858	0.97741	0.925911	0.926721	0.846905
-10.1942	1.30829	1.4155	0.726618	0.79222	0.93705	0.94134	0.693688	0.875559	0.948463	0.956428	0.804694	1.30502	1.07821	1.31315	1.15808	1.07004	1.08256	0.998818	1.1797	0.922781	1.05996	0.950578	0.908667	1.04851	1.29816	1.18724	0.909629	0.887216	0.762461	0.886504	0.99496	1.04618	1.04796	1.03912	1.02104	0.912401	1.02272	1.05463	1.04193	0.888806	0.840963	0.799309	0.548178	0.99279	0.881555	0.870359	0.835793	0.931641	0.997131
-10.0971	1.31227	1.2398	0.866781	0.806587	1.06372	0.855648	1.03763	0.894493	0.921928	1.03327	0.956876	1.31423	1.05817	1.40079	1.14028	0.823147	0.967362	1.00279	1.28094	0.932042	1.01954	0.873815	0.820481	1.09306	1.20293	1.18406	0.942033	0.861426	0.997999	0.984797	0.911184	0.810897	0.997404	1.08764	1.0901	1.18551	1.10248	1.04543	1.07235	0.886519	0.873393	1.01636	0.535652	0.847059	0.927493	0.897315	0.755863	0.807566	1.01405
-10	1.30039	1.14777	0.943218	0.925322	0.932	1.03086	1.00851	0.839044	0.912394	0.937832	0.838862	1.29984	1.20482	1.20292	0.965524	1.37278	0.924513	1.08643	1.24055	1.03162	1.14882	0.857424	0.829296	1.03109	1.12977	1.13825	0.965764	0.780768	1.01366	0.836429	1.05199	0.973492	1.17649	0.923812	0.990924	0.986058	0.952905	0.885674	1.20154	0.942459	0.857083	0.807132	0.581292	0.979766	1.03229	1.03157	0.923836	0.905781	1.02329
-9.90291	1.28058	1.09758	0.98779	0.884648	0.988106	0.939375	0.94713	0.977498	1.06585	0.983039	1.1304	1.15132	1.184	1.49163	1.05382	1.09389	0.985239	1.04465	1.12942	1.08431	1.03485	0.871219	0.886612	0.915848	1.06765	1.07111	1.09906	0.805875	1.01894	0.758994	1.06361	1.08295	1.19323	0.98858	1.13498	1.15715	1.23665	0.906849	1.14546	0.866191	0.950195	0.832493	0.480284	0.912183	1.11951	0.936357	1.00585	0.972837	1.05195
-9.80583	1.28246	1.01148	1.0076	0.93127	0.916023	0.852328	1.00038	0.840663	0.928766	0.995666	1.12346	1.2994	1.02072	1.22006	1.01247	0.888188	1.00154	0.940151	0.982927	1.11357	0.799251	0.910791	0.921302	0.845923	1.06343	1.07148	0.961818	0.848933	1.00535	0.966034	0.997956	1.09261	1.11257	0.913237	0.983214	1.12145	0.955025	0.987626	0.89725	1.20461	0.869399	0.989917	0.564884	1.04879	0.99033	1.04405	0.790705	0.932728	1.04177
-9.70874	1.31009	0.978952	1.01732	0.832081	0.959915	0.909377	0.781508	1.11542	0.996954	1.07357	1.12636	1.31453	1.01844	1.16076	0.874833	0.956056	1.08277	0.921996	1.00574	1.11685	0.868521	0.934545	0.969492	0.789418	1.10821	1.1224	0.981971	0.85028	0.851487	0.761572	0.886883	1.11392	1.07209	0.953001	0.926581	0.796322	0.92542	0.938893	0.93955	0.995245	0.937109	0.621328	0.529469	0.952743	0.923716	1.0056	0.920486	0.963211	0.937914
-9.61165	1.3892	1.05357	1.00685	0.929578	0.910646	1.08854	1.02842	0.922236	0.890129	0.909803	0.976457	1.37903	0.902877	1.1307	0.992662	1.02729	1.01226	0.896192	1.01848	1.14259	0.904294	0.926664	1.04468	0.759752	1.251	1.27442	1.03136	0.762433	0.786723	0.768058	1.04739	1.22473	1.07674	1.00994	1.04293	0.922422	0.86056	0.894614	1.00605	0.938053	0.965659	0.727132	0.453432	0.896302	1.22317	0.97643	0.871355	1.01853	0.922233
-9.51456	1.37448	1.04334	0.969646	0.982019	0.934468	0.876512	0.606609	0.835002	0.906326	0.823369	0.977272	1.26152	1.01018	1.20535	0.927801	0.837801	0.95978	0.85509	1.01109	1.21324	0.873071	0.944362	1.02247	0.868655	1.24031	1.26339	0.997162	0.839788	0.823332	0.843736	0.960462	0.863786	1.06752	0.98672	1.07419	0.813887	1.0854	1.08624	1.03986	0.938353	0.913497	0.962318	0.506157	0.837106	1.19075	0.961379	0.868619	1.04233	0.966765
-9.41748	1.31283	0.990682	0.919083	0.814466	0.968681	0.913255	0.819182	1.1366	0.820229	0.926226	0.955876	1.25447	0.92736	1.19887	0.878038	1.07973	0.854005	0.825593	1.07615	1.16722	0.793558	0.97485	0.951564	1.04684	1.15288	1.17085	0.94925	0.785082	0.611267	0.863653	1.13474	0.81324	1.04706	1.06013	1.38772	1.08553	1.18663	1.02443	0.907726	0.958725	0.941317	0.96515	0.452698	1.05562	0.989447	1.02054	0.916976	0.87241	1.0129
-9.32039	1.13414	1.01913	1.00987	0.910848	0.998933	0.990148	0.770552	0.799135	0.941321	0.83144	0.978402	1.32069	1.07375	1.14377	0.847459	1.15829	0.843696	0.801898	1.17743	1.06287	0.689901	1.05375	0.965354	0.970522	1.09153	1.03352	1.01552	0.738516	0.750371	0.770826	0.905286	1.05038	1.05499	1.09832	1.24485	0.923793	1.15356	1.03665	0.963127	1.17477	0.976818	0.724565	0.442787	0.879442	0.985912	1.0305	0.950541	0.888814	1.03669
-9.2233	1.02448	1.04438	1.03164	0.803849	0.937886	0.891672	0.996787	0.939345	1.01186	1.08253	0.875654	1.34784	1.05929	1.81056	0.935463	0.7863	1.05756	0.731061	0.998511	0.876208	0.896722	1.06243	0.967846	0.974605	1.04274	0.952682	1.04254	0.670666	0.614609	0.764322	0.706619	0.984287	1.02993	0.968852	0.819181	1.09105	0.977926	1.00465	1.01197	1.05039	0.969871	1.00712	0.513805	0.899395	1.11776	1.08553	1.04546	0.922734	0.896326
-9.12621	1.05291	1.06321	0.915366	0.802791	0.978535	0.999761	0.903567	1.13966	0.945987	1.10701	0.922923	1.29772	1.09589	1.37517	0.987671	1.01462	0.897255	0.714994	0.913474	0.829378	0.961931	0.930659	0.947742	1.1395	1.01906	0.984823	0.952129	0.765091	0.856344	0.968463	0.971066	1.04345	1.0477	1.03092	1.23929	0.997484	1.18058	1.10073	1.01484	1.10657	0.999562	1.02284	0.534763	1.00814	1.16693	0.951253	0.874402	0.901279	0.864859
-9.02913	1.08714	1.04536	0.865639	1.06121	0.989006	0.997545	1.24762	0.909748	1.00876	1.12873	1.12304	1.29276	0.966839	1.22378	0.85917	0.993999	0.974022	0.808463	1.0162	1.06221	0.743914	0.955204	0.966651	1.14133	1.01178	1.00054	0.937657	0.669572	0.815378	0.83365	0.877428	1.09014	1.08725	0.937216	0.98898	0.965973	1.18719	1.18763	0.927769	1.26914	1.10079	0.858486	0.519535	0.906479	1.12252	1.10307	0.900376	1.03256	0.966255
-8.93204	1.12429	1.00915	0.849184	0.930996	0.967457	0.992326	0.903465	0.950775	1.08067	0.951453	1.1962	1.17191	0.974896	1.06596	0.934106	0.950113	0.953403	0.87526	1.1515	1.11349	0.841315	1.05791	1.00507	1.06163	1.01271	1.00805	0.961911	0.835064	0.809699	0.778293	0.751404	0.750773	1.05087	1.01775	0.978156	1.1146	1.11088	1.03879	0.984771	1.01591	1.05743	0.713755	0.591572	1.00215	1.24643	0.966838	0.87169	0.9616	1.00679
[truncated: 1,092 more rows]
[truncated: 38 more columns]

## Sheet: VTA data for 3b and c 
Figure 3b and c	VTA F data
time (s)	1	2	3	4	5	6	7
-97.0874	0.943971	0.942036	1.91457	1.07048	1.03541	NaN	0.757304
-96.9903	0.923704	0.934899	2.09221	0.910089	1.02391	NaN	0.745531
[truncated: 1,999 more rows]

## Sheet: Fig 3d right 
Figure 3d right
	LC axon binned F
[truncated: 32 more rows]
[truncated: 38 more columns]

## Sheet: fig 3d left
Figure 3d left
[truncated: 18 more rows]
[truncated: 38 more columns]
