# Supplementary material for: Distinct catecholaminergic pathways projecting to hippocampal CA1 transmit contrasting signals during navigation in familiar and novel environments
Source: eLife. 2024 Nov 6;13:RP95213. doi: 10.7554/eLife.95213 (PMC11540301; doi:10.7554/eLife.95213)
Supplement: Figure 4—source data 1. [file elife-95213-fig4-data1.xlsx]

## Sheet: Fig4 b and c
Figure 4 b and c	VTA F data
time (s)	1	2	3	4	5	6	7
-97.0874	0.943971	0.942036	1.91457	1.07048	1.03541	NaN	0.757304
-96.9903	0.923704	0.934899	2.09221	0.910089	1.02391	NaN	0.745531
-96.8932	0.935834	0.896969	1.93578	0.989358	0.99225	NaN	0.797581
-96.7961	0.887236	0.863681	1.68921	0.994282	1.10041	NaN	0.832289
-96.699	0.929345	0.871264	1.65923	0.98787	1.02477	NaN	0.832315
-96.6019	0.897203	0.907345	1.91164	1.00049	1.10806	NaN	0.832932
-96.5049	0.879678	0.849959	1.69978	0.99888	1.07117	NaN	0.833845
-96.4078	0.873584	0.923069	1.89909	1.00297	1.03784	NaN	0.780057
-96.3107	0.898317	0.877583	1.61791	0.992165	0.937388	NaN	0.758138
-96.2136	0.85702	0.903987	2.04101	1.07097	1.07706	NaN	0.799954
-96.1165	0.946961	0.880988	2.045	1.04654	1.076	NaN	0.807355
-96.0194	0.89844	0.845464	1.86601	0.998115	1.00388	NaN	0.797547
-95.9223	0.992036	0.901185	1.63429	0.975206	1.00236	NaN	0.802029
-95.8252	0.869386	0.858188	2.21263	1.00149	1.03693	NaN	0.795959
-95.7282	0.934109	0.872825	1.85598	0.909227	1.11221	NaN	0.768781
-95.6311	0.877202	0.837392	1.90098	1.03736	1.0386	NaN	0.763521
-95.534	0.957441	0.953725	1.95998	0.923746	1.10825	NaN	0.769219
-95.4369	0.948044	0.906709	1.54843	0.933056	1.04952	NaN	0.788158
-95.3398	0.855012	0.933273	1.65345	1.06622	1.01494	NaN	0.816247
-95.2427	0.878141	0.932846	1.44023	0.97481	1.07785	NaN	0.862634
-95.1456	0.943324	0.930234	1.89937	0.98284	1.05303	NaN	0.815077
-95.0485	0.900059	0.942972	1.64467	0.934673	1.0995	NaN	0.720549
-94.9515	0.896764	0.971125	1.21323	1.03151	1.04616	NaN	0.786326
-94.8544	0.881163	0.906144	1.23226	0.903715	1.05765	NaN	0.830015
-94.7573	0.895108	0.936242	1.41836	1.01576	1.01827	NaN	0.829531
-94.6602	0.866774	1.02454	1.50865	0.982496	1.0604	NaN	0.814508
-94.5631	0.865702	1.04073	1.23362	1.08904	1.07381	NaN	0.792215
-94.466	0.832086	1.1366	1.0523	0.975411	0.989548	NaN	0.787708
-94.3689	0.916627	1.06115	1.25527	0.948345	1.08702	NaN	0.787113
-94.2718	0.909856	1.04172	1.0737	1.0892	1.00615	NaN	0.794345
-94.1748	0.895122	1.10637	1.15515	0.985175	1.03375	NaN	0.780649
-94.0777	0.914253	1.0485	1.07949	1.04546	0.957911	NaN	0.756489
-93.9806	0.865208	1.07585	0.795259	1.09954	0.951881	NaN	0.762868
-93.8835	0.854288	1.03727	1.05204	1.22829	0.932246	NaN	0.776188
-93.7864	0.859382	1.0712	0.964625	1.11406	0.930167	NaN	0.80339
-93.6893	0.843228	0.9861	0.901723	1.07773	1.01291	NaN	0.795427
-93.5922	0.81814	0.962725	1.04219	1.01907	0.894369	NaN	0.769881
-93.4951	0.809703	1.0159	0.918964	1.02937	1.02944	NaN	0.78113
-93.3981	0.858612	1.08171	0.860162	1.01974	1.0114	NaN	0.793142
-93.301	0.895549	1.09082	0.728851	0.996971	0.958252	NaN	0.80668
-93.2039	0.878182	1.15554	0.812589	1.04498	1.07766	NaN	0.79092
-93.1068	0.87285	1.07645	0.979892	1.02986	0.960489	NaN	0.760512
-93.0097	0.904701	1.0487	0.967713	0.946335	1.08353	NaN	0.774429
-92.9126	0.891611	1.09813	0.933499	0.921341	0.973092	NaN	0.782091
-92.8155	0.893271	1.19038	1.0586	0.912769	1.00613	NaN	0.777244
-92.7184	0.877947	1.2395	0.846324	1.01107	1.05887	NaN	0.756693
-92.6214	0.826609	1.20353	0.836936	0.95707	1.05301	NaN	0.728289
-92.5243	0.873966	1.35945	0.936933	1.00095	1.05428	NaN	0.739466
-92.4272	0.905622	1.36622	0.780467	0.937201	1.01694	NaN	0.756854
-92.3301	0.952297	1.3841	0.76255	0.95376	1.08277	NaN	0.786663
-92.233	0.981432	1.51405	0.820671	1.04757	1.10487	NaN	0.79237
-92.1359	1.00678	1.46181	0.863346	0.931878	1.04193	NaN	0.786025
-92.0388	0.95308	1.5867	0.966053	0.946477	1.02428	NaN	0.816683
-91.9417	0.929237	1.60706	0.686539	1.01349	1.08097	NaN	0.831831
-91.8447	0.928536	1.54402	0.714515	0.932556	1.1064	NaN	0.815958
-91.7476	0.951893	1.67502	0.805935	1.00235	1.01825	NaN	0.803767
-91.6505	0.928358	1.6332	0.702499	0.926414	1.03144	NaN	0.793415
-91.5534	0.914123	1.64655	0.688602	1.02163	0.985279	NaN	0.791995
-91.4563	0.9538	1.58581	0.608937	0.958192	1.00705	NaN	0.779858
-91.3592	1.03906	1.63303	0.925982	0.994821	1.03641	NaN	0.746289
-91.2621	0.988833	1.58313	0.784664	0.929361	1.08584	NaN	0.741281
-91.165	1.02163	1.5551	0.828599	1.02933	1.05859	NaN	0.750554
-91.068	1.05503	1.51962	0.770528	0.973157	1.00902	NaN	0.764847
-90.9709	1.0199	1.58364	0.726623	0.892982	1.03022	NaN	0.772948
-90.8738	1.04817	1.52944	0.702023	0.935837	0.928908	NaN	0.768666
-90.7767	1.12399	1.51087	0.706168	0.908466	0.996022	NaN	0.755765
-90.6796	1.20299	1.41303	0.807979	0.898636	1.01464	NaN	0.738555
-90.5825	1.22568	1.37503	0.636602	0.897807	1.02772	NaN	0.784736
-90.4854	1.1558	1.55015	0.802859	0.88788	0.968299	NaN	0.808624
-90.3883	1.23721	1.53613	0.754408	0.903122	1.01288	NaN	0.787925
-90.2913	1.09071	1.45917	0.804115	0.98849	1.09792	NaN	0.788237
-90.1942	1.12109	1.33738	0.754557	0.981847	1.05999	NaN	0.799055
-90.0971	1.09052	1.39458	0.74161	0.909154	1.08969	NaN	0.791888
-90	1.11027	1.33963	0.776427	0.983133	1.11795	NaN	0.805578
-89.9029	1.04169	1.44154	0.774311	0.981592	1.07408	NaN	0.860984
-89.8058	1.08171	1.37336	0.696616	1.02074	1.07581	NaN	0.852207
-89.7087	1.01988	1.38034	0.799546	0.924917	1.10513	NaN	0.811339
-89.6117	1.0918	1.39479	0.598693	0.980425	1.08422	NaN	0.816559
-89.5146	1.03383	1.37854	0.751784	0.903718	1.0447	NaN	0.803909
-89.4175	1.03627	1.38745	0.722893	0.920002	1.07852	NaN	0.755523
-89.3204	1.02609	1.35209	0.829946	0.885743	1.1119	NaN	0.78829
-89.2233	1.09187	1.3156	0.780976	0.873376	1.04387	NaN	0.861634
-89.1262	1.03767	1.42562	0.852077	0.897163	0.988451	NaN	0.81067
-89.0291	1.08997	1.32587	0.901357	0.883497	1.00016	NaN	0.775348
-88.932	1.03438	1.45679	0.821699	0.870549	0.981504	NaN	0.771313
-88.835	1.05306	1.57705	0.769091	0.905264	1.0444	NaN	0.772851
-88.7379	1.05903	1.76105	0.86441	0.865115	1.04438	NaN	0.777177
-88.6408	1.08675	1.79	0.936234	0.94735	1.03198	NaN	0.765526
-88.5437	1.10772	1.80021	0.873821	0.899983	1.04251	NaN	0.76278
-88.4466	0.996123	1.73273	0.768027	0.850768	0.96817	NaN	0.777846
-88.3495	1.12786	1.73569	1.09429	0.996739	0.934196	NaN	0.764638
-88.2524	1.24871	1.73267	1.31974	0.939608	0.956546	NaN	0.737294
-88.1553	1.2767	1.59171	1.15502	0.881596	0.964137	NaN	0.741131
-88.0583	1.15395	1.65525	1.40585	0.913255	0.912564	NaN	0.76148
-87.9612	1.07932	1.60395	1.20814	0.82742	1.06292	NaN	0.814855
-87.8641	1.20746	1.55857	1.34643	0.940301	0.917839	NaN	0.799735
-87.767	1.12452	1.64901	1.51571	0.858188	0.973136	NaN	0.750368
-87.6699	1.24371	1.64639	1.15525	0.934676	0.898275	NaN	0.798284
-87.5728	1.29325	1.50542	1.61704	0.857455	0.97236	NaN	0.81509
-87.4757	1.25892	1.53505	1.30656	0.916701	0.960103	NaN	0.769675
-87.3786	1.23145	1.53604	1.42393	0.945115	0.900301	NaN	0.760824
-87.2816	1.27607	1.47365	1.49463	0.852797	0.995965	NaN	0.770256
-87.1845	1.22827	1.49229	1.27544	1.01443	0.932226	NaN	0.795352
-87.0874	1.37193	1.46856	1.40672	0.859439	1.08557	NaN	0.82319
-86.9903	1.22462	1.42465	1.50081	0.828049	0.984195	NaN	0.856514
-86.8932	1.27792	1.47048	1.38558	0.805369	0.975038	NaN	0.851883
-86.7961	1.23991	1.4316	1.69152	0.933068	0.938354	NaN	0.828275
-86.699	1.24559	1.36448	2.07586	0.922167	0.972881	NaN	0.831744
-86.6019	1.26091	1.40229	1.9294	0.973088	0.947121	NaN	0.817986
-86.5049	1.2969	1.37699	1.71936	0.819292	0.961849	NaN	0.769776
-86.4078	1.25312	1.31846	1.56412	0.867125	0.865376	NaN	0.775939
-86.3107	1.30547	1.42849	1.77764	0.842684	0.87967	NaN	0.80929
-86.2136	1.23183	1.41458	1.90424	0.91423	0.906399	NaN	0.771456
-86.1165	1.25843	1.32176	1.93494	0.894465	0.941936	NaN	0.752949
-86.0194	1.2848	1.39201	2.48199	0.962614	0.903732	NaN	0.773099
-85.9223	1.23517	1.39446	1.92471	0.771404	0.997519	NaN	0.797158
-85.8252	1.23007	1.32149	2.45843	0.888616	1.038	NaN	0.823171
-85.7282	1.175	1.3648	2.44447	0.945923	1.02371	NaN	0.818407
-85.6311	1.14997	1.25455	2.11976	0.871561	1.0538	1.68869	0.810564
-85.534	1.11847	1.26978	1.73206	0.917767	0.992026	1.75455	0.796562
-85.4369	1.14785	1.26954	2.15399	0.886016	1.0704	1.79731	0.792878
-85.3398	1.10919	1.30209	1.63803	0.917001	1.09876	1.8369	0.794352
-85.2427	1.18635	1.22736	2.1505	0.891044	1.05356	1.80712	0.769178
-85.1456	1.15119	1.2153	1.83094	0.857531	1.12521	1.96755	0.761594
-85.0485	1.16229	1.26077	2.01997	0.898344	1.10623	1.90662	0.789191
-84.9515	1.19279	1.24507	1.98479	0.792095	1.05892	1.8393	0.789052
-84.8544	1.11916	1.18347	1.85237	0.868735	1.07976	1.74376	0.775045
-84.7573	1.07152	1.16167	2.06013	0.929097	1.14165	1.99094	0.763236
-84.6602	1.06593	1.164	1.63109	0.875906	1.09916	1.93976	0.756785
-84.5631	1.04668	1.21153	1.86091	0.964327	1.11345	1.95726	0.761051
-84.466	1.08747	1.21968	1.43861	0.855039	1.14946	2.11949	0.794696
-84.3689	1.02392	1.18465	1.16485	0.886543	1.09934	2.13458	0.84303
-84.2718	1.0729	1.0888	1.54629	0.890053	1.09796	2.07498	0.819559
-84.1748	0.996995	1.11533	1.32256	0.830641	1.03969	2.31795	0.809445
-84.0777	1.01931	1.18023	1.13838	0.89778	1.07063	2.3342	0.826046
-83.9806	1.05646	1.15215	1.32517	0.927451	1.15317	2.52127	0.813124
-83.8835	1.05271	1.02239	1.57892	0.895885	1.08257	2.67051	0.78544
-83.7864	1.08491	1.07356	1.17187	0.941216	1.01938	2.47276	0.780648
-83.6893	1.00087	1.02884	1.15029	0.934608	1.05203	2.5707	0.779996
-83.5922	0.988495	1.03326	1.392	0.836372	0.976797	2.57647	0.787622
-83.4951	1.02055	1.02068	0.922396	0.815518	0.980945	2.74916	0.795484
-83.3981	0.954545	1.08431	1.56949	0.879026	0.982729	2.62649	0.803464
-83.301	1.00081	1.02611	1.11442	0.869739	1.05006	2.76221	0.779045
-83.2039	0.957568	1.09041	0.940393	0.89479	0.986823	2.68644	0.77092
-83.1068	0.980844	1.01459	1.43513	0.93038	0.895191	2.67701	0.795385
-83.0097	1.03239	1.05116	1.11929	0.934841	1.0759	2.65584	0.7902
-82.9126	1.06437	1.02305	0.967841	1.06668	0.987405	2.79967	0.770189
-82.8155	1.06083	1.04852	0.924786	0.956173	1.03632	2.60428	0.800674
-82.7184	1.02898	1.00703	1.05595	0.951694	0.982295	2.74543	0.809212
-82.6214	1.10487	1.01747	1.05121	1.00515	1.14813	2.55062	0.773857
-82.5243	1.06136	0.973187	0.923227	0.938491	1.12061	2.58299	0.753746
-82.4272	1.07746	1.01801	0.974746	1.00432	1.10711	2.57447	0.741256
-82.3301	0.991113	0.987336	0.947451	1.07887	1.08326	2.52542	0.741869
-82.233	0.943146	1.01238	0.873932	1.00645	1.02624	2.7141	0.749653
-82.1359	0.947382	0.980667	0.920703	1.03366	1.05808	2.37419	0.771778
-82.0388	0.977968	1.02467	0.926953	0.987706	1.04957	2.26415	0.781213
-81.9417	1.00407	1.00003	0.977032	0.941398	1.03943	2.2221	0.784302
-81.8447	0.95523	0.967812	1.07259	0.912847	1.0406	2.21019	0.778338
-81.7476	0.960545	0.984239	0.996196	0.969981	1.06242	2.36648	0.786534
-81.6505	0.882517	1.06062	0.801351	0.963507	1.14697	2.11161	0.823051
-81.5534	1.04594	1.03922	0.849177	0.93481	1.01042	2.14827	0.803734
-81.4563	1.11208	0.990509	0.827608	0.868747	1.05474	2.31231	0.756499
-81.3592	1.08127	0.949481	0.873957	0.931349	1.09616	2.20195	0.756844
-81.2621	1.05089	1.03257	0.6989	0.890297	1.00235	2.24732	0.772787
-81.165	1.06397	1.01366	0.726265	1.0431	1.09286	2.26071	0.819925
-81.068	1.12983	1.01899	0.840642	0.91022	1.06546	2.28461	0.811063
-80.9709	1.18977	1.00202	0.806097	0.837317	1.02706	2.20183	0.774201
-80.8738	1.34618	1.02293	0.776822	0.873128	1.11221	2.29592	0.76236
-80.7767	1.26048	0.942768	0.871924	0.884038	0.987621	2.14557	0.764748
-80.6796	1.22267	0.950026	0.830088	0.852641	0.989973	2.21752	0.795596
-80.5825	1.18643	1.04367	0.713095	0.858329	1.03065	2.28013	0.795473
-80.4854	1.20017	0.973984	0.599419	0.893931	0.912361	2.15379	0.779864
-80.3883	1.22207	1.05522	0.673489	0.910118	0.995786	2.16981	0.772937
-80.2913	1.11549	1.09346	0.83889	0.886406	1.07988	2.08044	0.773666
-80.1942	1.32869	1.01716	0.855419	0.913338	1.00823	2.17548	0.789705
-80.0971	1.22368	1.00057	0.716059	0.917758	1.0968	2.02708	0.808133
-80	1.26669	0.989172	0.766936	0.802554	1.04638	2.03895	0.827755
-79.9029	1.2868	1.0168	0.797882	0.934391	0.980012	2.12244	0.798369
-79.8058	1.29898	1.0622	0.6632	0.852892	0.999184	2.17436	0.784656
-79.7087	1.30802	0.977918	0.656005	0.863402	1.01847	1.98971	0.802291
-79.6117	1.20843	1.0391	0.813923	0.836893	1.04654	2.06422	0.800087
-79.5146	1.21421	0.987213	0.776802	0.960721	1.03788	2.11566	0.787964
-79.4175	1.17957	0.95614	0.790851	0.863546	0.938382	2.11984	0.787502
-79.3204	1.23847	0.964915	0.712883	0.918958	0.949003	2.08942	0.784933
-79.2233	1.23192	0.912799	0.746821	0.866796	0.840146	1.87105	0.778152
-79.1262	1.15352	0.955621	0.761019	0.963753	1.03338	1.97429	0.781613
-79.0291	1.1855	0.971702	0.794791	0.856777	1.0099	1.86428	0.790194
-78.932	1.29236	0.939712	0.716167	0.823395	1.0269	1.93626	0.793536
-78.835	1.20271	0.874631	0.868338	0.917916	0.879181	1.89861	0.799538
-78.7379	1.22258	0.927067	0.994129	0.803171	0.980337	2.07291	0.810858
-78.6408	1.17565	0.97323	0.858821	0.809216	0.943875	1.94178	0.803141
-78.5437	1.21421	0.94301	0.929429	0.922575	0.899099	1.84899	0.785905
-78.4466	1.29303	0.980488	0.98358	0.87261	1.02109	1.99188	0.782462
-78.3495	1.25661	0.94641	0.856179	0.849597	1.00568	2.02815	0.76308
-78.2524	1.17217	0.940081	0.869323	0.86881	1.08998	2.10547	0.71182
-78.1553	1.37871	1.00484	1.04348	0.902369	1.00795	2.00929	0.747769
-78.0583	1.21317	0.931424	0.785375	0.930802	1.13686	1.93914	0.827322
-77.9612	1.27199	0.973153	1.00245	0.909791	0.979705	1.91604	0.79639
-77.8641	1.2636	0.870944	0.921068	0.781499	1.05793	1.97096	0.774858
-77.767	1.26882	0.882986	0.951286	0.963692	1.02613	2.09412	0.772127
-77.6699	1.36207	1.00403	1.05263	0.812265	1.10756	1.96194	0.762267
-77.5728	1.51224	0.962267	1.13108	0.840569	1.009	2.0325	0.748843
-77.4757	1.45891	0.987832	1.15913	0.905576	1.05636	1.99029	0.753339
-77.3786	1.66494	0.970086	1.52571	0.797796	1.07268	1.95544	0.761303
-77.2816	1.63777	0.982917	1.14977	0.902566	0.986154	2.00596	0.776207
-77.1845	1.67361	0.968001	1.30688	0.899134	1.09458	1.83092	0.781372
-77.0874	1.66109	0.963152	1.40887	0.901578	1.04965	1.88083	0.781668
-76.9903	1.62691	0.949474	1.06446	0.829659	1.02917	1.86458	0.7993
-76.8932	1.69046	1.00672	1.3424	0.946325	0.993984	1.97853	0.802586
-76.7961	1.57491	0.987117	1.27844	0.889133	1.01375	2.03141	0.777182
-76.699	1.59464	0.916599	1.57021	0.921256	1.01598	1.98415	0.796192
-76.6019	1.62857	0.902564	1.34405	0.850672	1.09684	1.98662	0.83741
-76.5049	1.45769	0.955719	1.43066	0.864168	1.06998	1.69101	0.808889
-76.4078	1.49126	0.942188	1.98182	0.872103	1.09607	2.04527	0.790641
-76.3107	1.493	0.928503	1.81693	0.864691	1.03281	1.8242	0.792937
-76.2136	1.46681	0.9087	1.7112	0.860981	1.04781	1.81352	0.803346
-76.1165	1.48825	0.92558	1.7946	0.905305	1.04758	1.89061	0.817812
-76.0194	1.45683	0.972595	1.57812	0.822665	1.08701	1.76034	0.786427
-75.9223	1.39873	0.881117	1.94984	0.86411	0.898641	1.77755	0.754446
-75.8252	1.36777	0.953618	2.10911	0.849975	1.03897	1.7723	0.721273
-75.7282	1.38104	0.967324	1.66315	0.914057	1.0175	1.73786	0.754495
-75.6311	1.32407	0.895507	2.08695	0.903223	1.1051	1.8884	0.820914
-75.534	1.35712	0.92709	1.70712	0.805735	1.23994	1.72559	0.795953
-75.4369	1.29966	0.969642	1.98266	0.897971	1.13598	1.70483	0.780074
-75.3398	1.26199	1.02693	1.90858	0.927088	1.06022	1.71016	0.78236
-75.2427	1.35179	1.00313	1.56113	0.873588	1.1499	1.52958	0.798099
-75.1456	1.42173	0.97877	2.04547	0.833171	1.06035	1.50451	0.820565
-75.0485	1.27978	0.955196	2.0057	0.827546	1.14809	1.3862	0.803232
-74.9515	1.24176	0.981061	1.92348	0.884924	1.11626	1.43384	0.792763
-74.8544	1.21886	1.02233	1.58523	0.922685	1.11393	1.45905	0.796022
-74.7573	1.42991	0.994497	1.70033	0.865203	1.04547	1.35987	0.796086
-74.6602	1.46215	1.0169	1.64191	0.955819	1.02345	1.29144	0.794551
-74.5631	1.49237	0.95889	1.39664	0.92821	1.08709	1.31087	0.807988
-74.466	1.50074	0.960511	1.23555	0.893092	1.08326	1.35492	0.811692
-74.3689	1.44709	0.924439	1.45913	0.935952	1.0935	1.45548	0.795931
-74.2718	1.40173	0.907275	1.27797	0.843018	1.0587	1.30639	0.779873
-74.1748	1.49162	0.9641	1.44354	0.914911	1.07837	1.31509	0.763667
-74.0777	1.4928	0.925683	1.09243	0.910154	1.055	1.39797	0.75504
-73.9806	1.66633	0.99598	1.30285	0.977408	1.0702	1.4362	0.757376
-73.8835	1.61833	0.95928	1.4674	0.972856	1.07802	1.46973	0.781637
-73.7864	1.56743	0.994188	1.33742	0.986621	1.08323	1.46172	0.793701
-73.6893	1.56092	1.06842	1.25182	0.908344	1.05401	1.4655	0.799666
-73.5922	1.4836	1.04667	1.38292	0.914852	1.11038	1.51574	0.7859
-73.4951	1.5328	1.05535	0.891859	0.967012	1.04523	1.61146	0.787
-73.3981	1.49132	1.06613	1.20688	0.903139	1.09919	1.58054	0.81783
-73.301	1.38871	1.0222	1.10959	1.01889	1.0274	1.5685	0.821036
-73.2039	1.40732	1.05215	0.827864	0.944525	1.06909	1.60118	0.81043
-73.1068	1.37678	1.00148	0.97508	0.99767	1.02413	1.65	0.801865
-73.0097	1.36136	1.00022	1.09501	0.943032	0.985574	1.57853	0.788819
-72.9126	1.44497	1.01807	1.08174	0.962978	0.930332	1.5897	0.766808
-72.8155	1.37267	0.960563	1.05578	1.00863	1.03084	1.63774	0.75994
-72.7184	1.29804	0.911367	0.98169	0.883936	0.98928	1.69317	0.760644
-72.6214	1.3918	0.979651	0.78173	0.899552	1.04873	1.60835	0.757193
-72.5243	1.36874	1.01338	0.787319	0.998629	1.01023	1.66992	0.761454
-72.4272	1.2114	1.0236	0.893485	0.936642	1.04389	1.65282	0.78114
-72.3301	1.29645	1.07554	1.0349	0.917796	1.06176	1.60856	0.762252
-72.233	1.25857	1.10659	0.861452	0.98578	1.01956	1.68616	0.724075
-72.1359	1.29519	1.056	0.967463	0.896295	0.921147	1.67273	0.773589
-72.0388	1.21699	1.03074	0.847568	0.85059	1.02241	1.55255	0.810109
-71.9417	1.17453	1.05256	0.897536	0.85108	1.02001	1.53232	0.82064
-71.8447	1.20802	1.01013	0.766564	0.914786	0.988191	1.60767	0.802661
-71.7476	1.12329	1.04528	0.812449	0.866425	1.02262	1.61021	0.770429
-71.6505	1.16364	0.94827	0.980615	0.929397	1.01555	1.64915	0.754835
-71.5534	1.20154	0.951376	0.846775	0.853587	1.05004	1.62533	0.749732
-71.4563	1.16513	0.998645	0.772725	0.915323	1.02665	1.57467	0.765611
-71.3592	1.1047	1.00131	0.827669	0.949086	1.02558	1.67473	0.772543
-71.2621	1.17071	1.00031	0.864485	0.825085	0.970251	1.59769	0.775
-71.165	1.15405	0.963119	0.862028	0.888461	1.11906	1.58628	0.771694
-71.068	1.18034	1.01359	0.693991	0.93602	1.12052	1.48925	0.770867
-70.9709	1.17759	1.01572	0.659552	0.817109	0.957961	1.59781	0.775
-70.8738	1.17488	0.968734	0.87816	0.885143	0.908983	1.47287	0.786967
-70.7767	1.24725	0.941931	0.810481	0.874269	1.02567	1.57155	0.802851
-70.6796	1.17709	0.978784	0.821906	0.791383	1.13894	1.45697	0.803286
-70.5825	1.21721	1.03189	0.881928	0.87636	0.9879	1.46466	0.802019
-70.4854	1.13248	0.985547	0.683447	0.891251	1.04212	1.53799	0.797351
-70.3883	1.12074	0.930507	0.666265	0.943562	1.12891	1.59436	0.799843
-70.2913	1.12149	0.940269	0.61471	0.831256	1.08222	1.50962	0.805915
-70.1942	1.1198	0.903785	0.729717	0.789856	1.06495	1.38745	0.791103
-70.0971	1.13693	0.967777	0.764639	0.892395	0.999629	1.36402	0.774279
-70	1.14024	0.957978	0.654789	0.820851	1.0123	1.41595	0.753434
-69.9029	1.10021	0.981183	0.706326	0.853824	1.06043	1.4106	0.756299
-69.8058	1.09221	0.95171	0.736065	0.849216	1.13791	1.37815	0.771018
-69.7087	1.07238	0.927138	0.656223	0.919123	1.08666	1.49233	0.794808
-69.6117	1.13771	0.993509	0.68402	0.853214	1.20318	1.45398	0.807766
-69.5146	1.15193	0.956428	0.718845	0.93724	1.09749	1.40914	0.799061
-69.4175	1.22079	0.974477	0.739687	0.894144	1.07552	1.28704	0.814389
-69.3204	1.15828	0.879404	0.644688	0.84897	1.17228	1.19535	0.841734
-69.2233	1.24194	0.923789	0.723906	0.955909	1.05374	1.27721	0.811087
-69.1262	1.19207	0.930882	0.672439	0.865837	1.05906	1.32143	0.782107
-69.0291	1.13902	0.893729	0.730721	0.868418	1.07607	1.32111	0.756464
-68.932	1.1344	0.915752	0.733605	0.950453	1.08892	1.34596	0.756323
-68.835	1.13824	0.926081	0.703806	0.962863	1.03533	1.26745	0.768934
-68.7379	1.16327	1.01144	0.749018	0.909827	1.0777	1.36869	0.769477
-68.6408	1.21797	0.98613	0.784046	0.847184	1.03665	1.31611	0.769956
-68.5437	1.29127	0.926727	0.887846	0.888668	1.05625	1.26917	0.770305
-68.4466	1.25345	0.987926	0.697997	0.863693	0.927702	1.27139	0.760379
-68.3495	1.39867	0.952017	0.811332	0.856046	1.02325	1.32467	0.745317
-68.2524	1.41521	0.932852	0.716721	0.948933	1.0428	1.4364	0.772641
-68.1553	1.35701	1.00412	1.1899	0.846101	1.13899	1.34901	0.795455
-68.0583	1.31205	1.04486	1.08878	0.926858	1.08953	1.31844	0.809248
-67.9612	1.2922	0.998271	0.957311	0.945301	1.02478	1.29801	0.780736
-67.8641	1.42772	0.978934	1.05369	0.957129	1.11341	1.33474	0.73107
-67.767	1.3822	1.02693	1.1232	0.943252	1.08253	1.30622	0.773571
-67.6699	1.32712	0.966427	1.05025	0.811374	1.05262	1.23183	0.791254
-67.5728	1.30051	1.04773	1.02989	0.898129	1.05467	1.21072	0.759306
-67.4757	1.38203	1.13968	1.40746	0.918887	1.1306	1.21034	0.768465
-67.3786	1.35979	1.15099	1.27601	0.959063	1.13263	1.17756	0.798177
-67.2816	1.35406	1.0993	1.15476	0.849002	1.1149	1.20599	0.807884
-67.1845	1.3783	1.02932	1.40267	0.964849	0.99258	1.2165	0.807993
-67.0874	1.41921	1.03946	1.31034	0.936573	1.02694	1.11906	0.788908
-66.9903	1.4034	1.04867	1.3587	0.963914	1.11363	1.10426	0.790071
-66.8932	1.46907	1.08167	1.4109	0.876118	1.08976	1.0902	0.801358
-66.7961	1.32343	1.07713	1.12075	0.972418	1.18129	1.22135	0.820127
-66.699	1.29354	1.04469	1.04801	0.980162	1.09263	1.24196	0.821192
-66.6019	1.44404	1.06642	1.07999	0.884209	1.09248	1.14916	0.786846
-66.5049	1.38348	1.10201	1.41713	0.855058	0.994206	1.14612	0.765175
-66.4078	1.42248	1.08643	0.970542	0.910494	1.0427	1.36274	0.749841
-66.3107	1.43281	1.1276	1.13003	0.876189	1.00639	1.34338	0.775231
-66.2136	1.37526	0.992883	1.37709	0.993711	1.02972	1.36225	0.78796
-66.1165	1.38033	1.0167	1.58849	0.899891	1.00789	1.36443	0.775364
-66.0194	1.40712	1.04594	1.32658	0.972125	0.940664	1.39198	0.786797
-65.9223	1.38162	1.02033	1.24924	0.940223	1.06554	1.40891	0.810245
-65.8252	1.40025	1.02059	1.34263	0.984136	0.936807	1.52348	0.814475
-65.7282	1.33993	1.04151	0.994128	0.911881	1.01213	1.42272	0.802291
-65.6311	1.38969	1.08876	1.46719	0.94535	1.0029	1.38508	0.757275
-65.534	1.24066	1.09086	1.5825	0.837781	0.991996	1.62643	0.744045
-65.4369	1.31935	1.21965	1.66397	0.941494	1.02955	1.44064	0.746708
-65.3398	1.29271	1.0655	1.55171	0.817594	0.9824	1.47488	0.75087
-65.2427	1.42621	1.17162	2.10455	0.976437	0.903191	1.52258	0.754784
-65.1456	1.41227	1.12572	1.57363	1.00444	0.945568	1.48646	0.758203
-65.0485	1.47433	1.09029	2.1334	0.982411	0.955502	1.43206	0.760787
-64.9515	1.35725	1.13805	2.03762	1.07282	0.956855	1.42919	0.762952
-64.8544	1.36252	1.11986	1.7002	0.945296	1.00446	1.56688	0.773686
-64.7573	1.40882	1.08146	1.86384	1.00081	0.983155	1.34445	0.787865
-64.6602	1.34174	1.07783	1.44316	0.939213	1.02178	1.41747	0.80893
-64.5631	1.34257	1.11077	1.60048	0.949262	1.10346	1.40794	0.826855
-64.466	1.31667	1.27627	1.54614	0.940876	0.957945	1.42903	0.843209
-64.3689	1.30624	1.44161	1.30892	0.998705	0.889391	1.41142	0.816682
-64.2718	1.35502	1.41586	1.64822	1.02831	0.967455	1.45004	0.797814
-64.1748	1.34618	1.40176	1.35251	0.878659	0.945491	1.43621	0.794266
-64.0777	1.4313	1.41981	1.06445	0.924334	0.916247	1.39285	0.812232
-63.9806	1.40084	1.34545	1.10348	0.853438	0.968756	1.5216	0.840956
-63.8835	1.52659	1.36706	1.06885	0.88217	0.93479	1.52638	0.816528
-63.7864	1.4193	1.3431	1.16673	0.904698	0.914034	1.3264	0.797389
-63.6893	1.38665	1.30746	1.33179	0.807791	1.00834	1.45381	0.788831
-63.5922	1.40436	1.28854	1.23801	0.776618	0.978374	1.43433	0.781628
-63.4951	1.30733	1.2689	1.12023	0.913689	0.924381	1.46281	0.775102
-63.3981	1.35514	1.21578	1.09224	0.888709	1.03694	1.47791	0.789926
-63.301	1.31386	1.3039	1.10184	0.916731	0.961204	1.37606	0.791513
-63.2039	1.37365	1.21074	1.01175	0.84773	1.03794	1.44857	0.766627
-63.1068	1.36328	1.31678	0.866188	0.906747	0.952626	1.29808	0.77154
-63.0097	1.25764	1.31587	1.14083	0.820658	1.11341	1.42488	0.791353
-62.9126	1.21675	1.37665	0.897513	0.90866	1.03587	1.39479	0.804264
-62.8155	1.24827	1.40244	0.949725	0.872235	1.13421	1.45327	0.812439
-62.7184	1.2019	1.37062	0.861033	0.814729	1.0061	1.42645	0.811141
-62.6214	1.18794	1.33567	0.835694	0.858493	1.06579	1.49211	0.807027
-62.5243	1.21916	1.37425	1.00957	0.872615	0.997554	1.44329	0.801505
-62.4272	1.22792	1.4456	0.881305	0.83092	0.994636	1.52699	0.801129
-62.3301	1.27243	1.31063	1.02221	0.971639	0.949982	1.40215	0.801637
-62.233	1.22711	1.27849	0.787651	0.904917	1.11005	1.34529	0.803912
-62.1359	1.17995	1.45138	1.04934	0.838827	1.03806	1.43988	0.804378
-62.0388	1.13899	1.42294	0.694678	0.96256	1.14888	1.24054	0.803939
-61.9417	1.13008	1.30819	0.976909	0.82277	1.1	1.28299	0.777278
-61.8447	1.09635	1.3711	0.740687	0.908855	1.17238	1.23828	0.782498
-61.7476	1.14871	1.30981	0.876253	0.882721	1.06182	1.35722	0.851479
-61.6505	1.14704	1.31074	0.877341	0.82279	1.06692	1.21964	0.820061
-61.5534	1.10152	1.28418	1.01899	0.887833	1.00156	1.26033	0.738445
-61.4563	1.0576	1.32258	1.05128	0.922094	1.0721	1.2303	0.755259
-61.3592	1.05972	1.26881	1.01772	0.860154	1.0771	1.19945	0.765103
-61.2621	1.03919	1.19615	1.1105	0.839203	1.00435	1.27726	0.761006
-61.165	1.0778	1.18949	0.965425	0.944977	1.065	1.29652	0.767235
-61.068	1.03783	1.25533	1.10626	0.972984	1.15077	1.33379	0.778629
-60.9709	1.05217	1.22137	0.781904	0.897925	1.12844	1.21994	0.821043
-60.8738	1.11479	1.22399	0.74376	0.873483	1.02622	1.28008	0.835516
-60.7767	1.07569	1.24859	0.804212	0.937161	1.04192	1.15911	0.794109
-60.6796	1.02196	1.18676	0.776508	0.81789	1.1598	1.24027	0.763332
-60.5825	1.0436	1.27972	0.907048	0.864498	1.10662	1.3031	0.737871
-60.4854	1.00117	1.25597	0.729049	0.995273	1.07399	1.25156	0.77147
-60.3883	0.98334	1.25271	1.00214	0.886867	1.16082	1.18694	0.796152
-60.2913	0.950487	1.26909	0.827385	1.00243	1.12476	1.30503	0.803
-60.1942	1.03184	1.13726	0.766774	0.993555	1.18944	1.26405	0.794554
-60.0971	1.03269	1.18829	0.811193	0.88246	1.15231	1.28261	0.77846
-60	1.06785	1.19779	0.765251	0.954921	1.0349	1.29002	0.802787
-59.9029	0.988602	1.23851	0.6782	0.85076	1.10192	1.21291	0.814281
-59.8058	1.03413	1.30641	0.734755	0.850246	1.07263	1.25423	0.800111
-59.7087	0.920179	1.22517	0.780974	0.928205	1.04616	1.10632	0.781922
-59.6117	1.03916	1.2912	0.653637	0.956263	1.09812	1.14729	0.761724
-59.5146	0.964221	1.25854	0.675851	0.934313	1.06731	1.23953	0.7642
-59.4175	1.00366	1.28295	0.686995	0.918767	1.06268	1.32037	0.763438
-59.3204	1.017	1.30177	0.700271	0.912894	1.16812	1.25108	0.756202
-59.2233	0.938031	1.33328	0.790183	1.0072	1.11686	1.20717	0.762315
-59.1262	0.988896	1.32523	0.830119	1.01953	1.22646	1.14446	0.775102
-59.0291	0.994957	1.23357	0.703488	0.938234	1.16682	1.18592	0.772388
-58.932	1.05176	1.28139	0.912369	0.96507	1.08421	1.18655	0.760164
-58.835	1.10172	1.29678	0.956482	0.881041	1.08387	1.20523	0.72892
-58.7379	1.06091	1.28327	0.727633	0.890492	1.07082	1.21411	0.748508
-58.6408	1.09054	1.26728	0.873537	1.03085	1.21236	1.12171	0.793512
-58.5437	1.04775	1.25539	0.895332	0.987707	1.09871	1.12541	0.800758
-58.4466	1.08259	1.45723	0.873507	1.00166	1.11771	1.20068	0.805339
-58.3495	1.07205	1.25847	1.08033	0.949752	0.983199	1.21343	0.804588
-58.2524	1.11171	1.33133	0.976071	0.967046	1.06162	1.13526	0.804115
-58.1553	1.08899	1.34379	1.12083	0.960049	1.122	1.1243	0.80378
-58.0583	1.0975	1.25492	1.07734	0.872744	1.06092	1.21425	0.795134
-57.9612	1.04919	1.27553	0.897749	1.02025	0.975105	1.32899	0.780658
-57.8641	1.07291	1.24102	1.01274	0.984964	1.04686	1.34469	0.754522
-57.767	1.09737	1.28756	0.898257	0.959297	1.04701	1.18726	0.779764
-57.6699	1.12511	1.22257	0.999813	1.06772	1.06231	1.24956	0.830695
-57.5728	1.06759	1.23061	1.14992	1.05472	0.983624	1.30536	0.814429
-57.4757	1.22529	1.2225	1.14916	1.06677	0.947122	1.21507	0.79308
-57.3786	1.25301	1.17396	0.876313	1.15981	1.01882	1.37881	0.761563
-57.2816	1.29662	1.17197	1.45499	1.24499	1.05715	1.22388	0.764052
-57.1845	1.32204	1.14749	1.35464	1.23673	1.04197	1.31416	0.783544
-57.0874	1.29095	1.17215	1.17708	1.12876	0.984524	1.28596	0.77771
-56.9903	1.26901	1.22165	1.2161	1.2186	0.951743	1.34052	0.771613
-56.8932	1.22755	1.1938	1.58613	1.13807	1.00548	1.14668	0.764988
-56.7961	1.17101	1.16762	1.15355	1.12819	0.890723	1.28301	0.783982
-56.699	1.30186	1.21676	1.29593	1.0612	1.01656	1.32519	0.815785
-56.6019	1.24037	1.17448	1.49519	1.1167	1.12891	1.27584	0.771788
-56.5049	1.21973	1.23246	1.52127	1.15347	1.05737	1.21973	0.748876
-56.4078	1.212	1.18901	1.56769	1.1042	0.950191	1.20192	0.768133
-56.3107	1.16904	1.22266	1.71411	1.17444	0.996391	1.22849	0.769251
-56.2136	1.23167	1.17399	1.50903	1.10095	0.907188	1.21474	0.761298
-56.1165	1.24058	1.13545	1.43624	1.13508	1.05312	1.23605	0.751936
-56.0194	1.2501	1.16402	1.55498	1.06001	1.0319	1.24642	0.762507
-55.9223	1.22463	1.1494	1.71948	0.94998	0.947876	1.30032	0.812944
-55.8252	1.32386	1.25063	1.80067	1.137	1.04405	1.20942	0.824342
-55.7282	1.25612	1.17077	1.47977	1.10296	0.984127	1.18515	0.816221
-55.6311	1.34727	1.16834	1.45554	1.01647	0.970683	1.0217	0.800097
-55.534	1.35726	1.08833	1.42158	1.09465	0.982701	1.12865	0.788513
-55.4369	1.25457	1.1385	1.91922	0.989794	1.01313	1.10718	0.786012
-55.3398	1.35029	1.16551	1.74433	1.01835	1.01336	1.07482	0.794764
-55.2427	1.31537	1.16867	1.57757	0.928017	1.05138	1.09054	0.809143
-55.1456	1.2162	1.12446	1.42823	1.0911	1.08745	1.1001	0.779442
-55.0485	1.28587	1.17018	1.6253	1.04993	1.02309	1.13175	0.766643
-54.9515	1.24015	1.08731	1.59248	1.04679	1.07037	1.15651	0.787644
-54.8544	1.24664	1.15188	1.64257	1.03335	1.07974	1.10524	0.791528
-54.7573	1.21881	1.10544	1.65975	0.88897	1.02545	1.00313	0.786852
-54.6602	1.25429	1.07555	1.63584	1.05611	1.01945	1.09139	0.784013
-54.5631	1.28978	1.14271	1.80461	0.991585	1.11197	0.929567	0.782177
-54.466	1.21049	1.14187	1.92991	0.966397	1.14959	1.06493	0.782349
-54.3689	1.22362	1.05701	1.81262	1.11237	1.03056	1.10893	0.778305
-54.2718	1.26683	1.00183	2.15808	1.13152	1.05408	1.21685	0.772154
-54.1748	1.22117	1.04254	1.54737	1.04568	1.03122	1.24683	0.782447
-54.0777	1.16734	1.00932	1.68116	1.03565	1.01822	1.13953	0.787641
-53.9806	1.16858	1.06003	2.13242	1.03646	1.08427	1.18739	0.782635
-53.8835	1.16482	1.06399	1.22829	0.986431	1.04096	1.13164	0.766537
-53.7864	1.18868	0.94568	1.36939	1.06991	1.03356	1.12796	0.744893
-53.6893	1.16534	1.01807	1.36842	1.09932	1.08631	1.32429	0.762984
-53.5922	1.27522	0.994037	1.80225	1.05433	1.18116	1.35438	0.775142
-53.4951	1.19147	1.01204	1.49993	1.06238	1.14425	1.31261	0.775432
-53.3981	1.32655	1.05293	1.40172	1.09188	1.0296	1.32786	0.771552
-53.301	1.31063	0.965037	1.70996	1.0477	1.10914	1.31357	0.765586
-53.2039	1.37303	0.997197	1.53026	1.10218	1.03843	1.15841	0.766344
-53.1068	1.35263	0.946053	1.21726	1.06082	1.07792	1.29873	0.780841
-53.0097	1.30753	0.999165	1.74356	1.04627	1.10388	1.18936	0.822816
-52.9126	1.29343	1.00135	1.38266	1.0321	1.01762	1.18199	0.821837
-52.8155	1.35031	1.00453	1.39291	1.11183	0.982137	1.15933	0.799382
-52.7184	1.25395	1.07426	1.30953	1.0278	1.09618	1.12962	0.794216
-52.6214	1.22908	1.04577	1.32158	1.01927	1.02684	1.05251	0.794198
-52.5243	1.24106	1.0189	1.35863	1.07629	1.00064	1.21734	0.804473
-52.4272	1.30395	0.944947	1.5606	1.09718	1.10171	1.19618	0.779941
-52.3301	1.24737	1.04811	1.35398	1.09163	0.997093	1.14777	0.738005
-52.233	1.27222	1.03435	1.14916	1.09165	1.13531	1.17133	0.764543
-52.1359	1.20417	1.06524	1.00037	1.05137	1.02443	1.20978	0.769197
-52.0388	1.18436	1.06549	1.20269	1.11668	1.10284	1.17303	0.730082
-51.9417	1.25355	0.99289	1.04859	1.06019	1.1366	1.20471	0.732007
-51.8447	1.15369	1.03942	1.28047	1.05241	1.06416	1.17322	0.754452
-51.7476	1.18219	0.970692	1.1206	1.0413	0.980644	1.15241	0.775717
-51.6505	1.07753	1.1399	1.20251	1.06106	1.04534	1.08266	0.78555
-51.5534	1.2066	1.16064	1.13537	1.1449	1.04913	1.21816	0.772519
-51.4563	1.14561	1.23134	0.895323	0.98925	0.9896	1.15318	0.76105
-51.3592	1.1106	1.1431	1.02454	0.995165	1.09109	1.23824	0.750362
-51.2621	1.09328	1.15574	1.0076	1.07016	1.05719	1.18222	0.755739
-51.165	1.1088	1.11184	1.12235	1.03786	0.956382	1.29047	0.768797
-51.068	1.09099	1.18274	1.04505	0.960241	1.02305	1.2796	0.797216
-50.9709	1.05499	1.09013	1.37729	1.00716	1.05651	1.31105	0.811101
-50.8738	1.02995	1.07043	1.16766	1.03136	1.0088	1.2645	0.817718
-50.7767	1.08921	1.09188	0.752917	0.949555	0.993025	1.29445	0.806126
-50.6796	1.05267	1.02562	1.08208	1.02201	1.02057	1.29076	0.795423
-50.5825	1.02882	0.961899	0.932257	1.06873	1.043	1.28721	0.786502
-50.4854	1.00601	1.08935	0.723288	0.993228	0.986193	1.1981	0.771807
-50.3883	1.0177	1.06343	0.724926	1.11945	0.960241	1.21039	0.754226
-50.2913	1.04493	1.0739	0.862832	0.952624	0.971249	1.23679	0.758513
-50.1942	1.02023	1.00561	0.950603	0.891349	0.95643	1.16385	0.762039
-50.0971	1.01118	0.989762	0.703991	1.08896	0.989145	1.23139	0.764042
-50	1.00065	1.02535	0.836577	1.10121	0.973032	1.16995	0.768467
-49.9029	0.977293	1.03078	0.753637	0.942527	0.881155	1.24409	0.774102
-49.8058	1.00518	0.973013	0.792433	1.01373	0.97578	1.26701	0.784533
-49.7087	0.965622	0.969688	0.809778	1.06816	0.896928	1.1993	0.789061
-49.6117	0.980903	0.896842	0.86791	1.02442	0.970672	1.26631	0.781786
-49.5146	0.994609	0.909659	0.630278	0.946418	0.967912	1.19746	0.78614
-49.4175	0.953563	0.978785	0.785731	1.03491	0.851287	1.28625	0.796309
-49.3204	0.938607	0.943496	0.755623	1.01117	0.955306	1.13656	0.770907
-49.2233	0.970814	0.974734	0.703325	0.965212	0.903947	1.13569	0.767925
-49.1262	1.03339	1.01689	0.877039	0.98396	0.843283	1.25526	0.809781
-49.0291	0.990887	1.00165	0.856712	1.05711	0.891623	1.07137	0.799677
-48.932	0.94544	0.976891	0.712459	0.977618	0.835577	0.951253	0.763592
-48.835	0.968823	0.961174	0.858996	0.903735	0.927218	1.08996	0.766122
-48.7379	0.973618	0.921242	0.84669	1.07788	0.8666	1.08273	0.771904
-48.6408	0.915404	0.963856	0.788415	1.09032	1.03778	1.0712	0.784192
-48.5437	0.943057	0.972163	0.785563	1.12668	0.96031	1.11596	0.794141
-48.4466	0.919352	0.967311	0.771627	1.06751	0.980354	1.13659	0.802922
-48.3495	0.877001	0.941211	0.887123	0.99469	0.943565	1.05733	0.811982
-48.2524	0.888886	0.994823	0.759054	1.10754	0.989648	1.10986	0.830867
-48.1553	0.92413	1.02581	0.824001	1.00244	0.994018	1.07343	0.869399
-48.0583	0.895798	0.983219	0.712825	1.00343	0.904141	1.04042	0.857875
-47.9612	0.943193	0.959915	0.702856	1.00341	0.970267	0.982735	0.821321
-47.8641	0.880665	0.978201	0.676161	1.05637	0.980605	1.11795	0.788125
-47.767	0.881045	0.960469	0.88849	1.1528	0.996755	1.13498	0.765624
-47.6699	0.879427	0.917229	0.821298	1.00374	1.01807	1.1382	0.76451
-47.5728	0.855192	0.92832	0.811679	1.06874	0.964086	1.10513	0.785835
-47.4757	0.987802	0.927533	0.685124	1.08859	0.983917	1.13982	0.81838
-47.3786	1.02953	0.896563	0.641286	1.06458	1.03	1.03814	0.803967
-47.2816	1.0314	0.907294	0.914039	1.08434	0.984741	1.22468	0.795838
-47.1845	1.01266	0.954378	0.838614	1.01027	0.928343	1.2277	0.800279
-47.0874	1.04402	0.92994	0.733102	1.02091	0.929621	1.08922	0.804461
-46.9903	0.984957	0.958698	0.965587	0.944954	0.94698	1.14476	0.808514
-46.8932	0.937275	0.935276	0.916812	1.02348	1.07128	1.08677	0.796205
-46.7961	0.964749	0.946582	1.25799	0.966531	1.07733	1.06574	0.787179
-46.699	0.93281	1.01121	1.10576	1.05179	1.01033	1.09839	0.784718
-46.6019	0.941346	0.942815	1.53702	1.04207	1.00266	1.09129	0.774976
-46.5049	0.923105	0.931887	1.82224	0.985502	1.08078	1.03971	0.761593
-46.4078	0.948985	0.989456	1.60392	0.937313	1.03315	1.05105	0.785187
-46.3107	0.979899	0.955248	1.40265	0.954207	1.02337	1.02247	0.786124
-46.2136	0.939613	0.944858	1.54766	0.97875	1.11328	0.997522	0.741749
-46.1165	0.978167	1.00667	1.52172	0.962241	1.056	1.05376	0.751918
-46.0194	0.928913	0.998293	1.77258	1.00101	1.10833	1.06518	0.789361
-45.9223	0.907758	1.04696	1.73257	0.930305	1.01068	1.05241	0.783743
-45.8252	0.854439	1.02664	1.18831	1.02195	0.934723	0.999058	0.7842
-45.7282	0.91236	1.03827	1.3119	0.909218	1.00164	1.07901	0.796808
-45.6311	0.927595	0.995827	1.42272	0.971779	1.04482	0.978855	0.807658
-45.534	0.904733	1.02856	1.61897	0.954409	0.958648	1.02699	0.81763
-45.4369	0.880924	1.07343	1.46283	0.942303	1.06333	0.998307	0.800585
-45.3398	0.89685	1.05653	1.21139	1.04223	0.929084	0.906046	0.795824
-45.2427	0.918441	1.02213	1.53046	0.990095	1.00961	0.924432	0.815632
-45.1456	0.928679	1.03064	1.61494	1.01281	1.07475	0.920591	0.794532
-45.0485	0.875395	1.02363	1.61413	0.925165	1.03387	0.925607	0.752978
-44.9515	0.905004	1.01744	1.72713	0.941544	1.00776	0.926691	0.747951
-44.8544	0.871128	0.977066	1.69055	0.84424	0.960912	0.978292	0.74986
-44.7573	0.870582	0.947256	1.74796	0.898737	1.04306	0.876441	0.765639
-44.6602	0.87663	0.940205	1.98907	0.986584	1.053	0.887717	0.786775
-44.5631	0.925308	0.94429	2.11039	0.969739	1.1915	0.987448	0.810589
-44.466	0.863429	0.991528	1.94949	1.03141	1.13329	0.990124	0.813084
-44.3689	0.838644	1.00907	2.03674	1.01385	1.10811	1.02237	0.81416
-44.2718	0.92575	0.999452	1.95127	0.956936	1.13477	1.11415	0.812398
-44.1748	0.961231	0.993085	1.56202	0.960524	1.08168	1.07806	0.788826
-44.0777	0.945297	0.96566	2.08069	1.00092	1.11851	1.19545	0.75435
-43.9806	0.898251	1.00545	2.17074	0.984752	1.18187	1.10649	0.746202
-43.8835	0.881352	1.01609	1.92767	0.913177	1.12516	1.16358	0.751347
-43.7864	0.85178	0.944385	1.89953	0.99356	1.07746	1.11921	0.783075
-43.6893	0.887317	0.965884	1.6651	0.954196	1.052	1.17369	0.814997
-43.5922	0.885471	0.971018	1.66617	0.914843	1.1115	1.02084	0.847016
-43.4951	0.820938	0.992397	1.89638	0.983057	1.13829	1.15324	0.799057
-43.3981	0.908586	0.88726	2.11267	0.972801	1.06802	1.10465	0.774062
-43.301	0.844299	0.920611	1.50436	1.01068	1.19305	1.0779	0.794998
-43.2039	0.916813	1.00288	1.34128	0.942298	1.16842	1.00877	0.788298
-43.1068	0.796957	1.01576	1.5758	1.07788	1.10735	0.974943	0.767781
-43.0097	0.81553	0.952862	1.5759	0.998027	1.13411	1.0008	0.772427
-42.9126	0.787441	0.878068	1.61912	0.987175	1.03643	1.00754	0.775568
-42.8155	0.762284	0.926311	1.25548	1.08519	0.983422	0.969464	0.775698
-42.7184	0.824578	0.943543	1.34796	1.01261	1.03612	0.967991	0.793973
-42.6214	0.886689	0.900205	1.19271	1.14088	1.14033	0.96581	0.821321
-42.5243	0.85783	0.953703	1.27019	1.09812	1.06126	1.01153	0.832113
-42.4272	0.883045	0.969752	0.964317	1.03	1.19403	1.04502	0.835228
-42.3301	1.00441	0.95885	1.57396	1.13348	1.0884	1.02526	0.822988
-42.233	0.9182	0.998303	1.24115	1.12231	1.15337	1.01856	0.832781
-42.1359	0.908183	0.989807	0.892606	1.22299	1.15565	1.11302	0.85359
-42.0388	0.899783	0.974124	1.08284	1.18259	1.11628	1.33216	0.806923
-41.9417	0.865257	1.0204	0.683763	1.29353	1.25243	1.17083	0.780379
-41.8447	0.856075	0.934987	1.28517	1.13773	1.14665	1.15786	0.794083
-41.7476	0.85152	0.980792	0.861776	1.11538	1.13632	1.12277	0.787913
-41.6505	0.835284	0.969825	1.00426	1.07929	1.0576	1.12953	0.771806
-41.5534	0.879064	0.999245	0.993305	1.0314	1.22194	1.22301	0.770166
-41.4563	0.816408	0.93674	0.699557	1.1353	1.18565	1.11845	0.781116
-41.3592	0.859492	0.949508	1.1668	1.07573	1.19546	1.12568	0.817243
-41.2621	0.888866	1.0798	0.898194	1.1043	1.15825	1.16837	0.835109
-41.165	0.797762	1.04165	1.01114	1.10018	1.14665	1.19778	0.843846
-41.068	0.822404	1.05055	1.08837	1.25979	1.11482	1.21049	0.797393
-40.9709	0.780593	1.07938	0.747108	1.12268	1.19968	1.15322	0.782684
-40.8738	0.833225	0.993013	0.608843	1.12935	1.03112	1.20251	0.831459
-40.7767	0.799279	1.02863	0.63718	1.09478	1.19146	1.13572	0.815131
-40.6796	0.866417	0.987829	0.631623	1.07897	1.07484	1.13855	0.76625
-40.5825	0.876213	1.0253	0.736657	1.12387	1.12734	1.21586	0.801042
-40.4854	0.906056	1.03249	0.793215	1.13085	1.07021	1.11157	0.806421
-40.3883	0.953195	1.10437	0.93062	1.08771	1.16436	1.15651	0.752974
-40.2913	1.05041	1.09411	0.868391	1.18827	1.07915	1.18554	0.749608
-40.1942	1.13503	1.10153	0.89088	1.06497	1.10331	1.18296	0.771281
-40.0971	1.08747	1.04885	0.874396	1.00375	1.20217	1.2267	0.767697
-40	1.05397	1.07948	0.715429	1.11025	1.08498	1.13688	0.773538
-39.9029	1.20171	1.04915	0.773577	1.14939	1.11445	1.11784	0.798229
-39.8058	1.17576	0.962208	0.749711	1.11953	1.18576	1.20444	0.797735
-39.7087	1.166	1.02957	0.905239	1.14235	1.19018	1.07144	0.784648
-39.6117	1.20252	1.02059	0.865184	1.21448	1.06704	1.16533	0.785492
-39.5146	1.17804	1.05259	0.751341	1.14889	1.14869	1.10872	0.801021
-39.4175	1.14845	1.16441	0.794818	1.09754	1.1425	1.10452	0.845919
-39.3204	1.15634	1.10577	0.784538	1.13744	1.11181	1.14887	0.840539
-39.2233	1.13427	1.04241	0.77934	1.13623	1.15108	1.074	0.810019
-39.1262	1.09381	1.06585	0.678282	1.08997	1.08614	1.06989	0.7934
-39.0291	1.12638	1.12096	0.840625	1.114	1.09268	1.10551	0.775506
-38.932	1.09818	1.15176	0.720294	1.10188	1.10934	1.16345	0.755065
-38.835	1.13869	1.3547	0.755324	1.21327	1.10717	1.13527	0.756344
-38.7379	1.0254	1.51868	1.0394	1.1193	1.14013	1.10784	0.768482
-38.6408	1.03857	1.32004	0.728832	1.1346	1.11372	1.10402	0.768057
-38.5437	1.01054	1.4922	0.782322	1.07578	1.08964	1.20528	0.776005
-38.4466	1.00411	1.40018	0.69943	1.09494	1.07712	1.16172	0.800702
-38.3495	1.05689	1.27576	0.808409	1.03918	1.06429	1.17542	0.793198
-38.2524	1.06661	1.25199	0.714101	1.13004	1.0325	1.16794	0.769594
-38.1553	1.01601	1.28136	0.831619	1.1933	1.093	1.14928	0.777516
-38.0583	1.03153	1.32079	0.773975	1.04188	1.05428	1.18978	0.789649
-37.9612	0.939602	1.29655	0.71242	1.11319	1.01828	1.11905	0.810206
-37.8641	0.950937	1.20429	0.692913	1.13736	1.07607	1.18385	0.79094
-37.767	0.960279	1.28605	0.756442	1.03141	1.05222	1.00294	0.751762
-37.6699	0.956617	1.22021	0.720286	1.05231	1.11926	1.1298	0.769438
-37.5728	0.93226	1.26695	0.641203	1.12332	1.16433	1.12925	0.778655
-37.4757	0.928961	1.24825	0.960227	1.01196	1.09296	1.03005	0.770953
-37.3786	0.919057	1.26389	0.834909	1.0599	1.07187	0.953026	0.785566
-37.2816	0.921549	1.22703	1.07043	1.10665	1.13548	1.00788	0.811335
-37.1845	0.931337	1.18678	0.894935	1.12633	1.09027	1.00158	0.835401
-37.0874	0.883777	1.19131	0.757694	1.26569	0.993966	0.970147	0.835461
-36.9903	0.939192	1.1354	0.920258	1.12658	1.07821	0.981256	0.787509
-36.8932	0.970331	1.20774	0.661775	1.04087	1.00931	1.01062	0.792627
-36.7961	0.89494	1.18765	0.823632	1.03224	1.04435	1.09044	0.824279
-36.699	0.906657	1.17898	0.869027	1.07655	1.04453	1.06028	0.807172
-36.6019	0.936102	1.20836	0.851556	1.02131	1.11082	1.087	0.793465
-36.5049	0.808551	1.19304	0.973485	1.10018	1.10591	1.00938	0.786559
-36.4078	0.909954	1.15607	0.749319	1.10935	1.07061	1.09178	0.772007
-36.3107	0.9336	1.17508	0.777792	1.0438	1.07169	1.08513	0.753633
-36.2136	0.974335	1.13299	0.932173	1.12229	1.10795	1.07651	0.784192
-36.1165	1.01642	1.12403	0.947371	1.00878	0.99477	0.987603	0.80124
-36.0194	1.09493	1.13927	1.11815	1.11625	1.14956	1.01898	0.791264
-35.9223	1.17129	1.21743	0.867321	1.04877	1.10169	0.971754	0.785165
-35.8252	1.24046	1.13642	1.0719	1.03213	1.04677	1.04329	0.781006
-35.7282	1.24549	1.19696	1.06902	1.10526	1.04026	1.10582	0.764334
-35.6311	1.23165	1.23072	1.35073	1.002	1.07219	1.03451	0.766405
-35.534	1.24023	1.16292	1.20774	1.10775	1.03521	1.05474	0.805961
-35.4369	1.09812	1.08943	0.836894	1.01003	1.02295	1.13674	0.82093
-35.3398	1.08479	1.15598	1.04495	1.04378	0.996459	1.1767	0.823606
-35.2427	1.17096	1.15998	1.1274	1.06764	0.987212	1.15493	0.803821
-35.1456	1.15234	1.04975	1.07189	0.932441	1.0472	0.993185	0.78355
-35.0485	1.0577	1.06223	1.08888	1.04548	0.958435	1.01729	0.762305
-34.9515	1.13394	1.11315	1.18879	1.0077	1.02525	1.0612	0.758856
-34.8544	1.14062	0.996691	0.935124	1.09043	1.0291	1.03895	0.764306
-34.7573	1.26274	1.03407	0.785686	0.874554	0.942982	1.14347	0.801202
-34.6602	1.14832	1.09291	1.32284	1.07771	1.1133	1.16437	0.819316
-34.5631	1.167	1.17065	1.09498	1.06299	1.12179	1.25824	0.799866
-34.466	1.15019	1.17062	0.977636	1.04659	1.10133	1.21096	0.806232
-34.3689	1.27418	1.13835	1.22874	1.01268	1.02203	1.23329	0.825507
-34.2718	1.25486	1.11048	0.878556	1.03025	1.04245	1.25877	0.810438
-34.1748	1.32227	1.12703	1.35069	1.15964	0.997866	1.27109	0.791374
-34.0777	1.21846	1.08844	1.38092	1.11748	1.10283	1.2772	0.764323
-33.9806	1.27006	1.17469	1.5785	1.07828	1.08132	1.29509	0.763875
-33.8835	1.16791	1.23419	1.11489	1.1294	1.08519	1.26973	0.776729
-33.7864	1.22432	1.21964	1.66928	1.04827	1.03843	1.27262	0.796661
-33.6893	1.22912	1.14037	1.55874	1.05292	1.00374	1.3082	0.79626
-33.5922	1.26157	1.21578	1.47501	1.0988	1.11802	1.41241	0.755196
-33.4951	1.2173	1.1526	1.83125	1.02423	1.13061	1.35659	0.770396
-33.3981	1.18416	1.36899	1.70475	1.00034	1.0672	1.45239	0.813728
-33.301	1.28943	1.52842	1.60507	1.01383	1.05996	1.22147	0.826379
-33.2039	1.36381	1.38636	1.56869	1.066	1.05727	1.23434	0.815391
-33.1068	1.33794	1.41195	1.63274	0.926793	0.981271	1.2558	0.757126
-33.0097	1.29471	1.40503	1.447	1.12976	1.01283	1.21876	0.750428
-32.9126	1.27698	1.33156	1.20309	1.10543	1.0587	1.28259	0.769513
-32.8155	1.25989	1.31692	1.77964	1.07704	1.05564	1.31042	0.774961
-32.7184	1.40128	1.4111	1.30088	1.14183	0.966471	1.4073	0.775665
-32.6214	1.22424	1.3638	2.01227	1.05559	1.04529	1.38306	0.766882
-32.5243	1.29218	1.26671	1.5564	1.0147	1.0389	1.41414	0.752989
-32.4272	1.27419	1.32413	1.43822	0.987652	0.994681	1.28801	0.736541
-32.3301	1.29949	1.26319	1.86058	1.02077	1.07977	1.3245	0.774368
-32.233	1.18923	1.25561	1.538	1.08262	1.05494	1.36342	0.796977
-32.1359	1.26882	1.33132	1.37802	0.966907	1.01059	1.2656	0.789149
-32.0388	1.18911	1.21373	1.6589	0.965941	0.979341	1.23149	0.772236
-31.9417	1.1872	1.17403	1.3066	1.09656	0.980578	1.06095	0.75078
-31.8447	1.22257	1.20827	1.40006	0.902522	1.09063	1.30087	0.7824
-31.7476	1.21337	1.1423	1.05685	0.926988	1.01859	1.15075	0.794493
-31.6505	1.19364	1.20206	1.11817	0.984474	1.07495	1.19103	0.767536
-31.5534	1.12379	1.1317	1.33403	0.893919	1.0272	1.1869	0.766836
-31.4563	1.13623	1.11504	1.178	1.07207	1.05537	1.24059	0.779265
-31.3592	1.45207	1.19165	1.27079	1.04948	0.985465	1.14815	0.795272
-31.2621	1.43412	1.07556	1.24149	1.04637	0.934585	1.09018	0.804544
-31.165	1.52815	1.13866	1.18059	1.13893	1.11589	1.11375	0.800346
-31.068	1.43005	1.10156	1.12654	1.09061	0.971675	1.20243	0.794588
-30.9709	1.49045	1.11659	1.4561	1.11539	0.894396	1.14536	0.788048
-30.8738	1.41201	1.07285	1.23751	1.31301	0.984588	1.17397	0.740063
-30.7767	1.39925	1.09194	1.08866	1.07116	1.00634	1.1292	0.72541
-30.6796	1.48043	1.11357	1.04101	1.13982	0.985773	1.08832	0.777423
-30.5825	1.42443	1.05469	0.771978	1.12169	1.04373	1.15939	0.786474
-30.4854	1.48869	1.03611	0.536121	1.13022	1.04782	1.03586	0.774044
-30.3883	1.44839	1.02092	0.788257	1.06638	1.08787	1.03683	0.756098
-30.2913	1.49778	0.998395	0.693238	1.28174	1.08657	0.97129	0.754795
-30.1942	1.39526	1.0252	0.754165	1.13882	0.921758	1.00932	0.786776
-30.0971	1.36932	1.04333	0.569739	1.15417	1.04701	1.00459	0.783222
-30	1.43426	1.0554	0.86325	1.05874	1.0341	0.999383	0.761901
-29.9029	1.39429	1.02625	1.2177	1.22316	1.07812	0.888479	0.811102
-29.8058	1.3234	1.04685	0.888143	1.18104	1.03291	0.926901	0.824928
-29.7087	1.34542	1.0194	0.933645	1.19669	1.12477	0.879927	0.768004
-29.6117	1.27991	1.0542	0.835759	1.0602	1.00473	0.889072	0.768366
-29.5146	1.37166	1.07755	1.07808	1.18682	1.04903	0.954608	0.79737
-29.4175	1.28994	1.09962	0.907977	0.984187	1.02009	0.860344	0.792081
-29.3204	1.3044	1.16975	0.90397	1.16845	1.0406	0.808135	0.793848
-29.2233	1.26671	1.30464	1.0972	1.08852	1.10434	0.826328	0.809728
-29.1262	1.2262	1.31673	1.00066	1.02425	1.04238	0.800592	0.812921
-29.0291	1.21953	1.46981	1.02089	1.04418	1.01482	0.782119	0.809772
-28.932	1.21173	1.5006	0.798106	1.08302	1.05057	0.856144	0.771851
-28.835	1.14266	1.46769	0.731439	0.969873	1.00572	0.809929	0.755939
-28.7379	1.18028	1.52077	0.72213	1.05809	1.03895	0.867352	0.784045
-28.6408	1.12764	1.37208	0.728385	1.11011	1.00156	0.921297	0.798227
-28.5437	1.12369	1.34364	1.10339	0.994755	1.06597	0.912911	0.805448
-28.4466	1.14149	1.46696	1.034	0.978067	0.987878	0.916545	0.758452
-28.3495	1.16019	1.38487	0.790588	1.0013	1.03901	0.815317	0.737512
-28.2524	1.13686	1.35338	0.775899	0.998202	1.05378	0.852693	0.768682
-28.1553	1.07346	1.36623	0.713889	1.02133	1.08858	0.793395	0.798539
-28.0583	1.08934	1.30714	1.02289	0.897683	1.06361	0.828232	0.827739
-27.9612	1.10528	1.33871	0.867085	0.883994	1.17372	0.831427	0.810235
-27.8641	1.0642	1.33847	0.799938	1.03219	1.16798	0.790895	0.790304
-27.767	1.156	1.3634	0.74309	1.01816	1.05068	0.798845	0.765517
-27.6699	1.22906	1.27146	0.874449	0.963221	1.1971	0.855827	0.742533
-27.5728	1.1165	1.24726	0.904898	1.0405	1.06704	0.81992	0.72045
-27.4757	1.09734	1.30277	0.950686	1.01501	1.0531	0.845072	0.743351
-27.3786	1.0982	1.22263	0.807096	0.97384	1.09993	0.881448	0.773107
-27.2816	1.11087	1.23401	0.707134	1.02093	1.14759	0.857683	0.816572
-27.1845	1.05318	1.23408	0.687689	1.08431	1.13435	0.949005	0.818453
-27.0874	1.09276	1.18672	0.865261	0.920655	1.06705	0.837349	0.799541
-26.9903	1.11071	1.2157	0.787621	0.940713	1.10658	0.85457	0.787359
-26.8932	1.0124	1.05405	0.826048	1.01777	1.09991	0.865248	0.789841
-26.7961	0.980765	1.10651	0.657616	0.98788	1.08109	0.922653	0.82165
-26.699	1.02913	1.10839	0.751982	0.964465	1.19071	1.03163	0.802275
-26.6019	1.08756	1.14006	0.765698	0.978008	1.07952	0.967232	0.757308
-26.5049	1.04258	1.10119	0.840253	0.938001	1.15585	0.978428	0.752678
-26.4078	1.02967	1.07093	0.666171	0.965646	1.03238	1.11668	0.761841
-26.3107	1.06235	1.12554	0.682893	0.937062	1.13577	1.11112	0.798587
-26.2136	1.15027	1.13732	0.709574	0.920402	1.1413	1.04341	0.799399
-26.1165	1.19287	1.04683	0.841021	1.03935	1.06605	1.01921	0.782243
-26.0194	1.25882	1.08702	0.754086	0.943216	1.08842	1.03534	0.752841
-25.9223	1.34005	1.08519	0.861085	1.01049	1.02215	0.953007	0.735648
-25.8252	1.29348	1.07144	0.913891	0.984279	1.0885	1.03606	0.742876
-25.7282	1.24553	1.07519	0.855621	0.903045	1.105	0.999819	0.759412
-25.6311	1.32481	1.06131	0.844346	0.980209	1.08642	1.02506	0.780601
-25.534	1.18547	1.02768	0.991483	1.01304	1.04089	1.20948	0.75862
-25.4369	1.21207	1.02413	1.07051	0.933122	0.963886	1.18324	0.743967
-25.3398	1.30625	1.08716	1.01806	0.908374	0.937172	1.25256	0.743972
-25.2427	1.24973	1.02884	0.830031	0.969513	0.985195	1.2014	0.750443
-25.1456	1.26402	1.0941	0.88878	0.929595	0.97811	1.00736	0.760147
-25.0485	1.20911	1.00475	0.897956	0.980823	1.03855	1.16886	0.770786
-24.9515	1.23857	0.974478	0.887195	1.03534	0.954857	1.10126	0.778199
-24.8544	1.21884	0.991454	0.990996	0.844742	1.01312	1.11242	0.779161
-24.7573	1.23407	0.996736	0.78145	0.965595	1.14573	1.10701	0.78531
-24.6602	1.22894	0.995458	1.03735	0.918036	1.02949	1.11176	0.794052
-24.5631	1.3012	0.954565	0.942221	1.10046	1.01392	1.24687	0.808026
-24.466	1.29974	0.984484	0.894037	0.980904	1.02233	1.15424	0.81256
-24.3689	1.3928	1.02298	1.02337	1.0312	0.927005	1.06827	0.79821
-24.2718	1.23848	0.904784	1.19086	1.02612	0.977945	1.20081	0.7759
-24.1748	1.26111	0.959966	1.18005	1.09702	1.01808	1.14231	0.749609
-24.0777	1.35989	1.01214	1.07008	1.01757	1.01095	1.21241	0.793802
-23.9806	1.3067	1.01005	1.11439	0.977267	0.973182	1.18361	0.818527
-23.8835	1.2373	0.892336	1.04408	1.04802	0.961118	1.2064	0.804318
-23.7864	1.11961	0.973025	1.00609	0.974676	1.09526	1.19723	0.780816
-23.6893	1.25785	0.93461	1.58993	0.984835	1.00528	1.2559	0.752666
-23.5922	1.2122	0.909601	1.25772	0.944467	0.974348	1.25793	0.782314
-23.4951	1.14407	0.927533	1.21318	1.04615	1.0926	1.18567	0.791257
-23.3981	1.35086	0.929678	1.39749	0.974762	1.01101	1.1693	0.758792
-23.301	1.11005	0.968504	1.20331	1.01824	0.922354	1.14373	0.769496
-23.2039	1.20025	0.924679	1.51714	0.978801	0.924373	1.20985	0.801784
-23.1068	1.25365	0.962977	1.43941	1.07749	0.968311	1.20831	0.783623
-23.0097	1.16574	0.9177	1.84265	1.01527	0.821795	1.15987	0.774067
-22.9126	1.12052	0.886907	1.55466	1.08076	0.911325	1.11979	0.781721
-22.8155	1.19324	0.872696	1.72491	1.09195	0.902361	1.14043	0.750994
-22.7184	1.25599	0.902315	1.61597	0.998883	0.909456	1.05519	0.701077
-22.6214	1.19678	0.88372	1.73926	1.12745	0.988055	1.04591	0.780104
-22.5243	1.2342	0.963472	1.5416	0.998781	0.948665	1.04261	0.822931
-22.4272	1.20221	1.01297	1.36453	0.978235	0.938007	1.06073	0.793355
-22.3301	1.17044	1.00169	1.58824	1.10353	0.929636	0.917149	0.792533
-22.233	1.29567	0.993962	1.63955	1.02468	0.926641	0.9327	0.806086
-22.1359	1.14336	0.98889	2.05186	1.04791	0.89973	0.97565	0.777591
-22.0388	1.31208	0.922833	1.46016	0.982033	0.97984	1.13901	0.768631
-21.9417	1.21838	0.932712	1.60752	1.01395	0.911339	1.06505	0.79874
-21.8447	1.44463	0.898292	1.70746	1.00878	1.02371	1.10643	0.808174
-21.7476	1.28679	0.9387	1.56477	1.00367	1.00959	0.913396	0.807271
-21.6505	1.3131	0.967438	1.38051	1.06173	0.97011	1.04055	0.777872
-21.5534	1.3654	0.912434	2.07802	0.933598	1.07542	1.04341	0.759792
-21.4563	1.33703	0.956187	1.8471	1.05275	1.04295	0.979605	0.764348
-21.3592	1.43713	0.94206	2.23385	1.19111	1.04572	0.98736	0.757824
-21.2621	1.42257	0.948301	2.13083	1.1729	1.05266	1.11612	0.745759
-21.165	1.36197	0.982503	1.78199	1.15371	1.04001	1.11084	0.782617
-21.068	1.42023	0.936212	2.02164	1.09189	0.951467	1.00512	0.807415
-20.9709	1.40894	0.968014	2.09255	1.24878	1.0871	1.0744	0.808095
-20.8738	1.36307	0.957447	1.71467	1.23267	1.02163	1.01533	0.803756
-20.7767	1.38857	0.948036	2.19309	1.25885	0.998214	0.957881	0.796906
-20.6796	1.35392	0.943809	1.66093	1.19222	0.99374	1.08201	0.807461
-20.5825	1.234	0.886764	1.45124	1.26204	1.10578	0.984965	0.814064
-20.4854	1.2668	0.943425	1.3976	1.25749	1.07805	1.11984	0.81276
-20.3883	1.27455	0.967805	2.16245	1.20934	1.06093	0.999826	0.797223
-20.2913	1.17878	0.89351	1.53253	1.18206	1.10242	1.02124	0.77457
-20.1942	1.27283	0.935091	1.69344	1.19123	1.14754	0.904549	0.79542
-20.0971	1.25889	0.910869	1.73987	1.21776	1.03818	0.979792	0.803337
-20	1.27466	0.900121	1.7519	1.14903	1.03804	0.960892	0.785389
-19.9029	1.22286	0.916745	1.3948	1.19009	0.981267	0.900756	0.768827
-19.8058	1.26284	0.983363	1.50158	1.12236	1.01294	0.967427	0.752957
-19.7087	1.21121	0.994285	1.52715	1.20935	1.03208	0.996778	0.766746
-19.6117	1.21932	0.906513	1.17906	1.07184	1.07996	1.02186	0.780012
-19.5146	1.12721	0.90109	1.22623	1.14443	1.04529	1.06043	0.792232
-19.4175	1.24298	0.910456	1.21875	1.24014	1.04038	1.1074	0.76691
-19.3204	1.20412	0.918706	1.25418	1.05618	1.06836	1.19048	0.722818
-19.2233	1.14361	0.930259	1.05378	1.06665	0.934671	1.08716	0.752077
-19.1262	1.13557	0.87354	1.26236	1.1681	1.00314	1.12478	0.767739
-19.0291	1.13672	0.938087	1.10279	1.0774	1.09063	1.08376	0.756204
-18.932	1.10775	0.928924	1.1763	0.960453	1.08102	1.08802	0.773803
-18.835	1.0541	0.888752	1.05303	1.15401	0.977684	1.14598	0.805968
-18.7379	1.06307	0.947261	1.11558	0.994941	1.04456	1.1647	0.805812
-18.6408	1.13487	0.921236	0.950138	0.97094	0.992684	0.995298	0.808519
-18.5437	1.12106	0.933091	1.12935	1.00715	1.00284	1.06757	0.816953
-18.4466	1.12925	0.88535	1.17347	0.899976	1.04114	1.08927	0.816428
-18.3495	1.18109	0.889273	1.13948	1.07661	1.11942	1.04451	0.811422
-18.2524	1.0954	0.912511	0.915739	1.10689	1.0272	1.09493	0.785247
-18.1553	1.12247	0.917899	0.770494	1.15628	1.00279	1.12648	0.765277
-18.0583	1.11325	0.920551	0.945391	1.00215	1.10411	0.999711	0.757719
-17.9612	1.13953	0.857645	1.02469	1.02438	1.11207	1.07578	0.756146
-17.8641	1.11127	0.960357	0.960609	1.00199	0.967516	1.02332	0.757563
-17.767	1.18776	0.923271	0.666651	1.05267	0.930393	1.09651	0.773482
-17.6699	1.0758	0.976567	0.818634	1.03501	1.0868	1.05689	0.78305
-17.5728	1.14993	0.928871	1.00377	1.03004	1.01412	1.15041	0.779918
-17.4757	1.15038	0.975095	0.925016	1.01764	1.09742	1.04319	0.785619
-17.3786	1.12741	0.919314	0.840567	0.953429	1.01915	1.17639	0.795737
-17.2816	1.15712	0.898133	0.845475	0.954665	1.03173	1.08086	0.77759
-17.1845	1.14289	0.91899	0.828707	0.954375	1.01872	1.11944	0.772874
-17.0874	1.13647	0.940344	0.886013	0.931434	1.07273	1.15455	0.795019
-16.9903	1.15564	0.932844	0.796274	1.03122	0.949927	1.19664	0.781022
-16.8932	1.16811	0.871134	0.933655	0.980193	1.04738	1.0327	0.748953
-16.7961	1.31726	0.880123	0.740106	1.03257	0.914589	0.994557	0.754422
-16.699	1.18676	0.915341	0.916411	1.04985	1.00587	0.938558	0.759367
-16.6019	1.27194	0.933911	0.752245	0.906032	1.02576	1.02306	0.763264
-16.5049	1.2466	0.909247	0.803821	0.956228	1.01394	1.00589	0.793726
-16.4078	1.19658	0.871891	0.806055	1.09903	1.02216	1.03088	0.837471
-16.3107	1.21022	0.954525	0.797509	0.935896	1.02499	1.16138	0.819435
-16.2136	1.08354	0.966334	0.752601	0.879591	1.04773	1.0522	0.792335
-16.1165	1.09622	0.946813	0.825802	0.981116	0.961159	1.04927	0.747108
-16.0194	1.21542	0.924515	0.853533	0.901754	1.05992	0.970354	0.72994
-15.9223	1.08939	0.921981	0.916932	0.991929	1.00055	1.00441	0.7268
-15.8252	1.09587	0.945739	0.742372	1.04429	1.01365	0.952635	0.753892
-15.7282	1.10925	0.894083	0.890701	1.00556	1.05068	0.994154	0.776701
-15.6311	1.14807	0.923501	0.697621	1.00368	1.1091	0.9517	0.790943
-15.534	1.16609	0.935731	0.66853	0.89898	1.15317	0.880599	0.801643
-15.4369	1.20505	0.932356	0.87251	1.06408	1.09594	0.942601	0.810571
-15.3398	1.28657	0.907608	0.762977	1.00007	1.03306	0.947186	0.807232
-15.2427	1.21167	0.946049	0.779709	1.0556	0.97247	0.814721	0.801038
-15.1456	1.2897	0.904664	0.698128	1.03332	1.00583	0.895738	0.789133
-15.0485	1.27116	0.965565	0.886704	0.99026	0.981237	0.931981	0.783628
-14.9515	1.31125	0.919973	0.854195	1.07952	0.985055	0.91942	0.781324
-14.8544	1.35834	0.917012	1.15752	0.995334	1.01286	0.91291	0.769509
-14.7573	1.28793	0.910394	0.892676	0.9311	1.02881	0.963348	0.757239
-14.6602	1.14209	0.878721	0.976289	1.03923	1.06574	0.956625	0.744062
-14.5631	1.33828	0.902844	1.17523	0.994855	0.979718	0.916044	0.750022
-14.466	1.25304	0.947468	0.917523	0.917785	0.991481	0.962465	0.765551
-14.3689	1.31747	0.871423	1.01743	0.96868	0.911314	0.859738	0.762832
-14.2718	1.28483	0.862107	1.08912	0.914965	0.936586	0.870535	0.766985
-14.1748	1.17756	0.902913	1.02816	1.07093	1.01902	0.883663	0.784884
-14.0777	1.18343	0.951066	0.927021	0.959939	0.95629	0.843303	0.776946
-13.9806	1.22896	0.931053	1.39949	0.998031	0.83122	0.872318	0.75609
-13.8835	1.22915	0.923812	1.31746	0.948414	0.937415	0.81406	0.799558
-13.7864	1.16145	0.936382	1.22793	1.08396	1.05789	0.816877	0.816471
-13.6893	1.19657	0.934082	1.28116	1.00899	1.00144	0.756975	0.780275
-13.5922	1.06617	0.935711	0.953116	1.03116	0.940511	0.780616	0.800778
-13.4951	1.12836	0.923548	1.2826	0.998343	1.04695	0.865783	0.849631
-13.3981	1.15528	0.889271	1.07692	1.05882	1.06802	0.818363	0.791535
-13.301	1.10686	0.960675	1.39341	1.14351	1.03386	0.825584	0.767829
-13.2039	1.13687	0.900926	1.1707	0.985074	0.963622	0.8759	0.812904
-13.1068	1.18008	0.866986	0.998358	1.01084	1.04249	0.834421	0.821878
-13.0097	1.28711	0.921523	1.01737	1.18276	1.03014	0.848868	0.812801
-12.9126	1.20793	0.921451	0.95073	1.06842	1.00861	0.842638	0.80219
-12.8155	1.04278	0.95816	0.920672	1.02106	1.01648	0.816295	0.802124
-12.7184	1.38285	0.922031	1.17396	1.07283	1.05698	0.834601	0.823144
-12.6214	1.23066	0.847786	1.31339	1.04122	1.03073	0.77111	0.83791
-12.5243	1.3296	0.923127	1.34173	1.08196	1.04034	0.892703	0.849549
-12.4272	1.24416	0.934946	1.45455	1.20068	0.934472	0.845102	0.808907
-12.3301	1.25985	0.905574	1.62373	1.20139	0.971608	0.931261	0.781084
-12.233	1.33625	0.887992	1.64085	0.97685	1.05923	0.825208	0.778896
-12.1359	1.32575	0.860881	1.63198	1.25619	0.967321	0.839417	0.774276
-12.0388	1.34264	0.907666	1.65097	1.22779	1.00329	0.919694	0.768439
-11.9417	1.30609	0.926004	1.78803	1.29271	1.00183	0.964229	0.785108
-11.8447	1.26866	0.882779	1.97233	1.19908	1.0804	0.946542	0.789938
-11.7476	1.29982	0.862385	1.87467	1.31041	1.03078	0.969225	0.771089
-11.6505	1.43017	0.851149	1.77115	1.36388	1.05628	0.950837	0.759328
-11.5534	1.42945	0.933572	1.81183	1.14823	0.973921	0.99842	0.75111
-11.4563	1.33676	0.944036	2.35313	1.44392	1.05359	1.08256	0.798954
-11.3592	1.35766	0.903267	2.07482	1.38786	1.01559	1.01188	0.823055
-11.2621	1.33513	0.883536	1.762	1.39324	1.09856	1.06994	0.799667
-11.165	1.32385	0.932567	1.86461	1.34649	1.0649	1.18995	0.777035
-11.068	1.31028	0.940619	1.8645	1.3876	1.03952	1.21264	0.75478
-10.9709	1.33478	0.900688	1.57084	1.33602	1.03118	1.1367	0.778812
-10.8738	1.32138	0.967291	1.61071	1.52046	1.05488	1.1189	0.790928
-10.7767	1.33218	0.9238	1.48933	1.37844	1.09889	1.18661	0.779211
-10.6796	1.28595	0.902203	1.51274	1.28606	1.06884	1.19089	0.7747
-10.5825	1.29914	0.970591	1.56582	1.35158	0.992957	1.24466	0.773792
-10.4854	1.16111	0.975999	1.65997	1.32344	1.03429	1.24461	0.766169
-10.3883	1.17802	0.988282	1.03086	1.24486	0.950381	1.19877	0.766655
-10.2913	1.21638	0.954216	1.44103	1.2849	0.946998	1.09021	0.783356
-10.1942	1.13473	0.956157	1.16381	1.28776	1.02435	1.11293	0.788765
-10.0971	1.19774	0.990527	1.19867	1.0788	1.10829	1.17451	0.788528
-10	1.13666	0.959911	1.12538	1.21352	1.1395	1.15149	0.815475
-9.90291	1.09481	0.948479	1.54319	1.21667	1.06138	1.13387	0.816909
-9.80583	1.11277	0.956075	1.33875	1.29088	0.993507	1.12393	0.767318
-9.70874	1.09207	0.969822	1.05428	1.20141	1.06723	1.07787	0.759851
-9.61165	1.08313	0.903802	1.22423	1.19896	1.08311	1.15869	0.773446
-9.51456	1.08958	0.892152	0.981779	1.14527	0.990357	1.15155	0.789807
-9.41748	1.21232	0.942295	1.3775	1.01243	1.00008	1.11984	0.791948
-9.32039	1.27501	0.935853	0.88847	1.11045	1.05854	1.23801	0.765653
-9.2233	1.21441	0.914115	0.898312	1.05244	1.01698	1.11103	0.757081
-9.12621	1.18124	0.964203	0.820589	1.1082	1.02102	1.09167	0.757371
-9.02913	1.2437	0.89264	0.781526	1.14001	0.959396	1.08822	0.797501
-8.93204	1.25402	0.917004	0.839646	1.07963	1.07768	1.15798	0.809229
-8.83495	1.27944	0.896648	0.952816	1.05672	1.04067	1.09232	0.764155
-8.73786	1.26384	0.907903	1.04528	1.0568	1.00612	1.08516	0.753099
-8.64078	1.12244	0.889193	0.921768	0.95115	1.06042	0.988378	0.759053
-8.54369	1.08167	0.90433	0.862721	1.02954	1.03333	1.03139	0.768809
-8.4466	1.14808	0.894987	0.8123	0.917657	1.01306	1.00105	0.776933
-8.34951	1.0976	0.879732	0.872272	1.04599	1.07247	0.965566	0.781794
-8.25243	1.15576	0.973229	0.821877	1.13685	1.05875	1.10136	0.784565
-8.15534	1.14075	0.944626	0.779151	1.02954	1.00497	0.983871	0.78629
-8.05825	1.08326	0.945206	0.804101	0.951084	1.04716	1.0943	0.784743
-7.96117	1.15859	1.02872	0.724956	0.976286	1.08424	1.00978	0.781958
-7.86408	1.10958	1.03487	0.62509	0.972388	1.02626	0.976361	0.7767
-7.76699	1.12234	1.01725	0.682057	0.95896	1.04045	1.04312	0.775086
-7.6699	1.09508	1.11485	0.656258	1.12031	1.09399	1.01002	0.775293
-7.57282	1.12672	1.08286	0.89298	1.03071	1.11748	1.05751	0.775328
-7.47573	1.11218	1.02538	0.732898	1.0377	1.08052	0.932378	0.779502
-7.37864	1.02387	1.27608	0.604266	0.893848	1.10079	0.910676	0.791954
-7.28155	1.12129	1.30962	0.750673	1.01043	1.09971	1.0032	0.809042
-7.18447	1.01816	1.35588	0.720761	1.0835	1.05706	0.926928	0.828448
-7.08738	1.03621	1.15314	0.802529	1.07922	1.10055	0.907616	0.777162
-6.99029	1.02275	1.05867	0.708246	1.00133	0.991934	0.934243	0.759864
-6.8932	1.02499	1.22262	0.803886	1.00138	1.10954	0.820951	0.810542
-6.79612	1.0142	1.30837	0.589808	1.21388	1.07461	0.868487	0.804129
-6.69903	1.0004	1.24615	0.857627	1.00908	1.14705	0.833277	0.769172
-6.60194	1.03121	1.22879	0.703532	1.11167	0.983385	0.755082	0.775137
-6.50485	1.01616	1.20659	0.858239	1.13472	1.05033	0.807285	0.782245
-6.40777	1.01761	1.18805	0.721268	1.07124	0.985356	0.867259	0.791636
-6.31068	0.956251	1.12013	0.813918	1.17418	1.02704	0.839678	0.780515
-6.21359	0.930435	1.20233	0.864735	1.18382	1.01887	0.836976	0.759137
-6.1165	1.02837	1.22103	0.886194	1.02806	1.0243	0.782514	0.793266
-6.01942	1.06703	1.21535	0.818799	1.11224	0.976891	0.858834	0.808422
-5.92233	1.01623	1.33415	0.60501	1.19696	1.03927	0.824752	0.785632
-5.82524	1.00621	1.1934	1.04146	1.11709	1.00505	0.840769	0.777419
-5.72816	1.10566	1.17804	0.801808	1.0679	1.00874	0.846706	0.776493
-5.63107	1.00751	1.24062	0.696054	1.13511	1.00371	0.785144	0.79947
-5.53398	1.13426	1.19768	0.829788	1.12216	1.02357	0.910878	0.809311
-5.43689	1.0582	1.21395	0.846435	1.18521	1.02739	0.821268	0.792884
-5.33981	0.982888	1.26625	0.801261	1.08832	0.995658	0.904815	0.79913
-5.24272	1.20915	1.34196	0.677751	1.10502	1.12827	0.91148	0.816714
-5.14563	1.16542	1.31126	0.778992	1.20173	0.983208	0.925285	0.783838
-5.04854	1.13081	1.25204	0.887091	1.27523	1.05162	0.914007	0.763682
-4.95146	1.14488	1.33875	0.896071	1.14452	1.06421	0.876031	0.768968
-4.85437	1.11494	1.32126	1.11053	1.131	1.08632	0.968914	0.775533
-4.75728	1.23117	1.34418	1.10629	1.1467	0.974367	1.05067	0.782738
-4.66019	1.07343	1.38098	1.00685	1.19576	1.10366	0.952225	0.781633
-4.56311	1.16873	1.46017	0.976788	1.15415	1.07873	1.06989	0.775216
-4.46602	1.18847	1.63953	0.968933	1.16406	1.08719	0.898243	0.758178
-4.36893	1.0372	1.6695	1.02254	1.1689	1.11425	0.993026	0.731986
-4.27184	1.19826	1.58606	1.40246	1.13849	1.14487	0.996841	0.701216
-4.17476	1.21608	1.56587	0.909753	1.26889	1.06349	1.10334	0.736809
-4.07767	1.12233	1.51601	1.29352	1.19972	1.09473	0.98268	0.771383
-3.98058	1.23976	1.47666	1.13185	1.21668	1.05716	0.970151	0.803918
-3.8835	1.16243	1.49243	0.928196	1.25938	1.07184	0.976841	0.807525
-3.78641	1.19199	1.40804	1.77387	1.27143	1.17013	1.00862	0.796667
-3.68932	1.19974	1.4365	1.56918	1.29406	1.16894	1.104	0.797958
-3.59223	1.2268	1.49634	1.09399	1.22895	1.02535	1.06977	0.798323
-3.49515	1.24043	1.50673	1.82408	1.14226	1.05997	1.06515	0.796833
-3.39806	1.18802	1.51997	1.54606	1.13167	1.05352	0.962419	0.781192
-3.30097	1.1489	1.60138	1.85482	1.14809	1.13781	0.9919	0.758475
-3.20388	1.06474	1.4858	1.65842	1.08726	1.02284	0.990841	0.772635
-3.1068	1.20818	1.58542	1.77951	1.16606	1.01156	1.07817	0.783185
-3.00971	1.20914	1.55493	1.17229	1.02855	1.00478	1.08089	0.786517
-2.91262	1.30185	1.50636	1.04279	1.17905	1.10261	0.956214	0.796182
-2.81553	1.37993	1.50585	1.13695	1.1532	1.05953	1.02592	0.809013
-2.71845	1.35043	1.48254	1.81925	1.23831	1.08439	1.06185	0.798692
-2.62136	1.27812	1.45931	1.46529	1.1486	1.08664	0.98416	0.792665
-2.52427	1.31866	1.39743	1.59978	1.19102	1.13183	1.04423	0.79523
-2.42718	1.30061	1.4744	1.88383	1.26148	1.10123	0.973243	0.794968
-2.3301	1.39643	1.43832	1.45662	1.36474	1.11494	1.0216	0.793292
-2.23301	1.33597	1.39922	1.95577	1.3503	1.11075	1.0822	0.778955
-2.13592	1.39695	1.42807	1.73291	1.29162	1.09376	1.10271	0.764158
-2.03883	1.33311	1.40098	1.87795	1.3612	1.0886	0.996245	0.74844
-1.94175	1.30381	1.55449	1.1897	1.39172	1.12977	0.962707	0.735472
-1.84466	1.25986	1.47139	1.80282	1.38373	1.11396	0.96332	0.723878
-1.74757	1.3039	1.47618	1.51922	1.27678	1.16047	0.941882	0.753209
-1.65049	1.21201	1.56038	1.14248	1.31027	1.16948	0.967943	0.771322
-1.5534	1.25996	1.65611	1.12704	1.17437	1.20099	1.06192	0.767001
-1.45631	1.20923	1.53121	1.29329	1.35036	1.11246	0.965094	0.75897
-1.35922	1.22382	1.53787	1.67595	1.29235	1.06089	0.938701	0.749085
-1.26214	1.14486	1.53164	1.51761	1.24047	1.01527	0.973303	0.781397
-1.16505	1.22141	1.46233	1.34475	1.18482	1.11285	1.00665	0.797683
-1.06796	1.17253	1.48628	1.1252	1.17708	1.18023	1.09123	0.781914
-0.970874	1.15294	1.40909	1.56931	1.21374	1.03168	0.982559	0.783237
-0.873786	1.16906	1.41316	1.66933	1.21804	1.03793	0.98941	0.793105
-0.776699	1.13816	1.43368	1.39802	1.1666	1.14923	0.923356	0.829752
-0.679612	1.14523	1.41458	1.37613	1.13526	1.1345	0.88038	0.831881
-0.582524	1.12827	1.53842	1.20193	1.18738	1.25641	0.923278	0.764975
-0.485437	1.14488	1.49872	1.0034	1.14425	1.12911	1.06762	0.752819
-0.38835	1.11951	1.48077	0.862542	1.08751	1.22349	1.01428	0.768038
-0.291262	1.09671	1.43066	1.03336	1.09243	1.23625	0.941963	0.75849
-0.194175	1.04208	1.58635	1.32644	1.04007	1.16263	0.953296	0.750531
-0.0970874	1.06689	1.58005	0.956533	0.999675	1.08875	0.891367	0.745754
0	1.00659	1.43355	0.756522	1.32525	0.733086	0.783352	0.786344
0.0970874	0.981607	1.37506	0.829374	1.28678	0.884914	0.786395	0.788146
0.194175	1.02745	1.57843	1.13384	1.2096	0.764317	0.774711	0.767829
0.291262	0.988621	1.68747	0.787903	1.25569	0.772041	0.768114	0.7579
0.38835	1.00002	1.70424	0.954147	1.25564	0.777209	0.714295	0.753165
0.485437	1.03044	1.74529	0.850679	1.19746	0.774546	0.761411	0.747127
0.582524	1.01014	1.6543	0.876026	1.24036	0.820874	0.735103	0.759338
0.679612	1.07081	1.71192	1.21367	1.20876	0.83869	0.777898	0.80805
0.776699	1.05581	1.60854	1.22774	1.23752	0.791406	0.784983	0.791212
0.873786	1.00431	1.6428	1.05353	1.22792	0.834533	0.729208	0.7416
0.970874	0.88111	1.63274	1.43011	1.11562	0.840874	0.728106	0.724936
1.06796	0.942766	1.62945	1.27413	1.24301	0.759153	0.665664	0.724225
1.16505	0.868026	1.53105	1.11049	1.19128	0.798268	0.780646	0.75542
1.26214	0.866013	1.51341	1.26564	1.19412	0.758382	0.76681	0.77013
1.35922	0.984432	1.51133	1.27188	1.05982	0.833091	0.789543	0.776597
1.45631	1.09248	1.52269	1.30307	1.17813	0.764439	0.726117	0.818096
1.5534	1.04006	1.44296	1.15744	1.10704	0.794597	0.726394	0.841302
1.65049	0.951297	1.48234	1.27262	1.0211	0.761875	0.809235	0.827925
1.74757	0.918726	1.43448	1.20386	1.03856	0.769577	0.751665	0.817054
1.84466	0.95159	1.46464	1.32455	1.01889	0.793332	0.800111	0.807436
1.94175	0.923374	1.48361	1.65188	1.11198	0.790794	0.798538	0.806959
2.03883	0.98631	1.42054	1.42417	1.08663	0.782536	0.750965	0.806106
2.13592	0.945796	1.47631	1.22485	1.04894	0.70436	0.749708	0.804503
2.23301	0.878772	1.54507	1.24435	1.02194	0.763865	0.770235	0.781232
2.3301	0.881927	1.4159	1.17929	1.07059	0.682549	0.776641	0.747126
2.42718	0.967141	1.38373	1.41711	1.01906	0.780757	0.798356	0.789118
2.52427	1.04004	1.42076	1.60808	1.07207	0.768027	0.774869	0.816387
2.62136	1.12499	1.36233	1.17801	0.983609	0.771152	0.745768	0.814207
2.71845	0.983952	1.34586	1.15839	1.0641	0.801649	0.778512	0.810918
2.81553	0.979542	1.36493	1.21717	0.98146	0.728299	0.776655	0.807074
2.91262	0.833563	1.31513	1.11132	1.00888	0.821018	0.7208	0.78955
3.00971	0.89346	1.35127	1.20826	1.06833	0.750028	0.748062	0.781327
3.1068	0.984897	1.34064	0.789997	1.045	0.777688	0.815584	0.791711
3.20388	0.975544	1.35701	1.12515	0.943144	0.80001	0.752101	0.78496
3.30097	0.962665	1.32638	1.02682	1.01813	0.735692	0.725775	0.769643
3.39806	0.841945	1.36301	1.20558	0.958794	0.816182	0.712749	0.750442
3.49515	0.879728	1.35086	1.12512	0.979498	0.772259	0.803355	0.75313
3.59223	0.970111	1.3654	1.26362	0.966886	0.768855	0.836709	0.799594
3.68932	0.89693	1.27669	1.11312	0.890617	0.724522	0.814712	0.784087
3.78641	0.911853	1.34185	1.60291	0.883716	0.752011	0.741338	0.737594
3.8835	0.919955	1.31642	1.1554	0.98668	0.782819	0.912762	0.757228
3.98058	0.927293	1.32458	1.0795	0.929415	0.734267	0.818157	0.765617
4.07767	0.830873	1.33268	1.26639	1.00031	0.770391	0.893911	0.751519
4.17476	0.884587	1.38852	1.18044	0.903313	0.76468	0.807862	0.773588
4.27184	0.878134	1.47372	1.40648	0.976661	0.796073	0.816261	0.81374
4.36893	0.856261	1.44504	1.49259	0.837166	0.822356	0.795438	0.795765
4.46602	0.933059	1.35185	1.33428	1.02292	0.793462	0.841846	0.780624
4.56311	0.881184	1.37722	1.16687	0.95885	0.756357	0.850188	0.771152
4.66019	0.905849	1.31345	1.22651	0.966405	0.801732	0.769075	0.792105
4.75728	0.886226	1.30654	0.981207	0.954294	0.804941	0.744691	0.828269
4.85437	0.854118	1.2826	1.31289	0.924987	0.807915	0.790294	0.788332
4.95146	0.968386	1.28477	1.36839	0.922019	0.790503	0.775742	0.755645
5.04854	1.03731	1.28395	1.70861	0.837522	0.79967	0.71605	0.737462
5.14563	0.885533	1.3407	1.54452	0.815035	0.80344	0.724445	0.726345
5.24272	0.876602	1.28911	1.44941	0.879801	0.764593	0.698519	0.718763
5.33981	0.86733	1.28921	1.13619	0.825119	0.786069	0.757312	0.717284
5.43689	1.03693	1.28296	1.31623	0.867035	0.699716	0.739342	0.721618
5.53398	0.936936	1.20919	1.39192	0.87747	0.766306	0.735103	0.737581
5.63107	0.958048	1.31209	1.03123	0.91767	0.765725	0.810288	0.769034
5.72816	0.991031	1.29911	1.08562	0.940386	0.763256	0.729382	0.808232
5.82524	0.917588	1.3178	1.24956	0.90993	0.751097	0.703809	0.787825
5.92233	0.898559	1.33721	1.19894	0.866705	0.835728	0.719484	0.777686
6.01942	1.06967	1.30552	1.19818	0.87506	0.761902	0.797258	0.788082
6.1165	1.12853	1.27735	1.37795	0.873079	0.737994	0.791238	0.782152
6.21359	0.893004	1.39686	1.19032	0.862615	0.716766	0.839514	0.76806
6.31068	1.07201	1.41657	1.35363	0.890719	0.780687	0.919169	0.769649
6.40777	1.0748	1.36381	1.1846	0.8591	0.750655	0.863841	0.768907
6.50485	0.993869	1.41455	1.30796	0.869723	0.77875	0.827835	0.763505
6.60194	1.12017	1.43281	1.68832	0.897151	0.810397	0.78798	0.766606
6.69903	1.09993	1.43249	1.42228	0.822336	0.754966	0.809736	0.773957
6.79612	1.01665	1.51611	1.40048	0.797463	0.708785	0.793992	0.755743
6.8932	1.03034	1.51483	1.15246	0.952857	0.76201	0.722598	0.761806
6.99029	0.943236	1.47362	1.37081	0.837639	0.806586	0.875874	0.816424
7.08738	1.03047	1.32303	1.39175	0.823195	0.794576	0.809344	0.796279
7.18447	0.99049	1.4308	1.24135	0.936749	0.767137	0.797771	0.738752
7.28155	0.907405	1.39263	1.45215	0.863534	0.806859	0.775071	0.735023
7.37864	1.0167	1.35346	1.29267	0.810343	0.823474	0.790234	0.745672
7.47573	0.927458	1.38109	1.6214	0.820853	0.832876	0.769761	0.785076
7.57282	0.942215	1.34883	1.08833	0.8693	0.79542	0.790078	0.793647
7.6699	0.885261	1.34186	1.15046	0.901037	0.811272	0.785812	0.786801
7.76699	0.889285	1.32753	1.33888	0.890814	0.806598	0.752339	0.793991
7.86408	0.899269	1.40364	1.60203	0.925194	0.811896	0.837042	0.794815
7.96117	0.865892	1.28905	1.01396	0.976171	0.775298	0.779829	0.782908
8.05825	1.02534	1.30222	1.10748	0.894665	0.76104	0.74152	0.784169
8.15534	0.933229	1.29665	1.05558	1.02409	0.789092	0.758785	0.792015
8.25243	1.01568	1.32077	1.11739	0.92537	0.774174	0.767263	0.788473
8.34951	1.02075	1.35468	1.09004	0.9603	0.727821	0.775976	0.789153
8.4466	0.856027	1.34352	1.01559	0.997888	0.761585	0.761608	0.798277
8.54369	0.969896	1.28607	1.2009	0.971591	0.730222	0.757849	0.802327
8.64078	0.877689	1.29612	1.18283	0.94202	0.781348	0.693723	0.803839
8.73786	0.904587	1.43019	1.11418	0.959519	0.720098	0.714908	0.79566
8.83495	0.963747	1.42004	0.996064	0.904881	0.759966	0.658604	0.798619
8.93204	0.891927	1.41448	1.36266	0.873642	0.78836	0.695076	0.823855
9.02913	0.995674	1.34936	0.929514	0.890963	0.785823	0.693474	0.790819
9.12621	0.895901	1.31748	0.984434	0.954724	0.833089	0.678011	0.728648
9.2233	0.805098	1.33639	1.12317	0.850041	0.736542	0.674886	0.769614
9.32039	0.80831	1.31209	1.0756	0.946174	0.788346	0.710524	0.796119
9.41748	0.783764	1.36723	1.13472	0.884418	0.816121	0.718601	0.793704
9.51456	0.90389	1.37298	0.911192	0.937639	0.766727	0.686693	0.786683
9.61165	0.938393	1.36487	0.865765	0.850221	0.752021	0.731941	0.77736
9.70874	0.862977	1.34277	0.94855	0.89518	0.839184	0.752601	0.773307
9.80583	0.920592	1.39351	1.00036	0.938093	0.781563	0.672877	0.770258
9.90291	0.875097	1.26347	0.95991	0.946904	0.798196	0.744732	0.769213
10	0.89199	1.33056	1.11265	0.981843	0.751487	0.75456	0.77821
10.0971	0.892403	1.28305	0.877036	0.946672	0.842461	0.652561	0.792227
10.1942	0.923949	1.21768	0.811911	0.8707	0.805556	0.708028	0.759091
10.2913	0.921375	1.26086	0.679369	0.948835	0.835173	0.714529	0.742273
10.3883	0.91874	1.26931	0.738045	0.962956	0.794452	0.692127	0.758089
10.4854	0.868647	1.25915	1.01016	0.908322	0.773036	0.729319	0.78995
10.5825	0.950675	1.27029	0.872058	0.807769	0.705793	0.713907	0.829835
10.6796	0.926927	1.18772	0.95951	0.921131	0.773837	0.717129	0.796169
10.7767	0.875653	1.2911	1.19484	0.912413	0.755341	0.721462	0.760598
10.8738	0.877575	1.27486	1.04076	0.940542	0.727836	0.752629	0.721217
10.9709	0.867393	1.33329	1.22617	0.897219	0.740912	0.739707	0.730338
11.068	0.91495	1.30801	0.969772	0.901218	0.733436	0.730001	0.76371
11.165	0.90775	1.38307	1.0748	0.892921	0.766149	0.785729	0.769075
11.2621	0.928402	1.44086	1.0644	0.894509	0.818337	0.840602	0.774241
11.3592	0.911679	1.41232	0.841619	0.863047	0.767671	0.725619	0.779011
11.4563	1.00366	1.47344	1.09285	0.816997	0.834616	0.86198	0.778637
11.5534	0.950041	1.4368	0.826651	0.871686	0.83237	0.914905	0.77569
11.6505	0.98572	1.48121	1.06632	0.788943	0.795477	0.909111	0.763255
11.7476	0.936391	1.41483	0.844779	0.865841	0.752853	0.872672	0.760206
11.8447	1.03643	1.42581	0.965839	0.878614	0.808634	0.794014	0.775931
11.9417	1.08636	1.36904	0.975012	0.791232	0.773027	0.731326	0.779247
12.0388	1.02966	1.33848	1.16466	0.794439	0.781055	0.791755	0.776358
12.1359	0.941804	1.39599	1.20087	0.829014	0.806184	0.748565	0.784469
12.233	0.928938	1.34312	1.1798	0.786105	0.796744	0.823048	0.788801
12.3301	0.948569	1.30762	1.045	0.903686	0.752494	0.816003	0.785573
12.4272	1.0037	1.36303	0.912205	0.795161	0.821375	0.905998	0.797604
12.5243	0.999734	1.31956	0.943944	0.810769	0.813492	0.940866	0.817266
12.6214	0.961877	1.28423	1.04063	0.838723	0.763713	0.85492	0.804563
12.7184	0.940975	1.35953	0.828934	0.814416	0.797058	0.905585	0.794636
12.8155	1.06005	1.45102	0.773579	0.849657	0.832057	0.798302	0.790258
12.9126	1.05251	1.3264	0.904105	0.848152	0.730883	0.848229	0.755916
13.0097	0.99088	1.35372	0.901662	0.907427	0.720663	0.874343	0.706591
13.1068	1.02288	1.30616	0.956012	0.750417	0.78984	0.775853	0.770343
13.2039	1.01966	1.32106	0.825129	0.773843	0.830667	0.824846	0.801138
13.301	1.05641	1.26243	0.682988	0.847514	0.695499	0.802964	0.76602
13.3981	1.06611	1.328	1.14841	0.836408	0.7787	0.876216	0.767876
13.4951	0.991315	1.35791	1.01553	0.769381	0.703319	0.789833	0.788219
13.5922	1.07125	1.39873	0.990463	0.795588	0.696433	0.797145	0.778186
13.6893	1.05324	1.35677	0.861306	0.810462	0.761774	0.835226	0.772798
13.7864	1.05799	1.28543	1.00387	0.743531	0.754242	0.890489	0.776698
13.8835	1.03766	1.2345	0.959695	0.801071	0.776151	0.81234	0.772831
13.9806	1.00077	1.21643	0.973598	0.822273	0.771851	0.778043	0.765082
14.0777	0.996834	1.30028	1.01429	0.80673	0.770526	0.841898	0.799297
14.1748	0.979573	1.16511	0.976797	0.820482	0.703193	0.83485	0.821935
14.2718	0.979983	1.19138	0.959553	0.836681	0.747156	0.878673	0.821418
14.3689	1.03133	1.25993	0.819007	0.803044	0.82031	0.812945	0.816789
14.466	1.00821	1.21358	1.15393	0.918594	0.787968	0.823301	0.810104
14.5631	0.970492	1.292	0.872636	0.849218	0.742664	0.808008	0.846973
14.6602	0.983355	1.2456	0.764299	0.881131	0.762931	0.878252	0.874811
14.7573	1.02982	1.22299	0.811569	0.773818	0.821371	0.90645	0.884584
14.8544	1	1.17314	1.0783	0.769354	0.753939	0.857474	0.878629
14.9515	0.963259	1.15063	0.821579	0.82587	0.869028	0.890796	0.864809
15.0485	0.979747	1.16506	0.790744	0.772515	0.818043	0.880459	0.79876
15.1456	0.952895	1.25497	0.953709	0.786533	0.749302	0.805359	0.770288
15.2427	0.96677	1.33126	0.877081	0.750148	0.871279	0.79319	0.816971
15.3398	0.8926	1.32635	1.0076	0.812236	0.739611	0.83235	0.810785
15.4369	0.98854	1.27815	0.918089	0.847613	0.74616	0.838846	0.778165
15.534	1.02098	1.27812	0.932458	0.823395	0.730546	0.844367	0.800295
15.6311	1.12635	1.27003	0.811162	0.897253	0.758289	0.863047	0.81272
15.7282	1.00273	1.2832	0.90869	0.904084	0.793901	0.835506	0.805735
15.8252	0.939259	1.2813	0.781456	0.830239	0.818623	0.781323	0.797267
15.9223	0.977548	1.24597	1.12734	0.767622	0.849957	0.826911	0.788058
16.0194	0.952129	1.30106	1.03515	0.906044	0.829574	0.785401	0.799554
16.1165	0.9478	1.25832	0.935203	0.927109	0.849461	0.770755	0.81021
16.2136	0.891759	1.26486	1.29139	0.891566	0.796444	0.72462	0.819187
16.3107	0.970639	1.18319	1.28197	1.02131	0.78458	0.794101	0.824039
16.4078	1.00236	1.26624	1.12403	0.932495	0.802115	0.774605	0.826829
16.5049	1.06907	1.30544	1.17357	0.927665	0.817285	0.771808	0.842987
16.6019	1.03166	1.31217	1.08982	1.00038	0.826536	0.722108	0.845223
16.699	0.962718	1.32661	0.798506	1.01226	0.807916	0.687707	0.819616
16.7961	1.00396	1.3235	0.960631	1.00652	0.808803	0.73671	0.8124
16.8932	1.11142	1.38277	0.909376	0.944096	0.798389	0.691353	0.81438
16.9903	1.05587	1.33777	0.999772	0.951931	0.762865	0.727067	0.81953
17.0874	1.11762	1.34319	0.904247	1.01067	0.725685	0.667953	0.814506
17.1845	1.04098	1.28327	0.696132	0.925366	0.806841	0.804941	0.789135
17.2816	1.0048	1.30563	0.818878	0.909698	0.754319	0.744584	0.808333
17.3786	0.973308	1.30605	0.802605	0.950699	0.78362	0.737836	0.849816
17.4757	0.933466	1.32554	0.914447	0.946911	0.771646	0.743512	0.845419
17.5728	1.00792	1.28007	0.787056	0.96137	0.746656	0.713083	0.846024
17.6699	1.1047	1.27502	0.993269	0.91001	0.803709	0.736694	0.856629
17.767	1.05189	1.27484	0.846725	0.830127	0.792992	0.765399	0.848254
17.8641	1.03701	1.31027	0.994402	0.926549	0.781187	0.730454	0.830389
17.9612	1.06654	1.34849	0.880936	0.918257	0.836612	0.799939	0.822178
18.0583	1.03475	1.30085	0.820995	0.922738	0.685204	0.764548	0.811233
18.1553	1.01501	1.31102	0.808626	0.91605	0.734885	0.802205	0.794818
18.2524	0.947092	1.34254	0.676838	0.877657	0.78154	0.813164	0.82243
18.3495	0.948247	1.24694	0.80033	0.869413	0.810118	0.834583	0.872054
18.4466	1.0223	1.27083	0.719366	0.883282	0.795659	0.700131	0.845309
18.5437	1.03751	1.27747	0.652922	0.87513	0.7835	0.747728	0.823917
18.6408	0.979938	1.35974	0.915223	0.886063	0.753192	0.745657	0.813228
18.7379	1.02609	1.33749	0.70384	0.856219	0.759245	0.725936	0.810325
18.835	1.03036	1.40425	0.790785	0.925038	0.756187	0.727332	0.811314
18.932	1.01112	1.25006	0.671992	0.826061	0.803373	0.700293	0.804824
19.0291	0.974242	1.29946	0.726542	0.86078	0.747518	0.750457	0.80614
19.1262	0.973826	1.31509	0.655352	0.752312	0.748961	0.700125	0.823069
19.2233	0.965898	1.35335	0.737214	0.761678	0.733604	0.733136	0.837041
19.3204	0.986882	1.36276	0.86724	0.948065	0.726888	0.71726	0.849535
19.4175	0.915515	1.29888	0.770306	0.855319	0.74085	0.776691	0.853247
19.5146	1.00519	1.21006	0.851829	0.870367	0.716385	0.832836	0.860246
19.6117	0.962901	1.14872	0.815097	0.859851	0.765378	0.769066	0.873821
19.7087	1.06016	1.25109	0.643717	0.907584	0.859357	0.798918	0.838898
19.8058	0.975887	1.19716	0.777976	0.831271	0.789794	0.734323	0.779727
19.9029	0.977437	1.25204	0.631178	0.831276	0.716534	0.774521	0.810215
20	1.0149	1.2207	0.735366	0.856131	0.705072	0.862776	0.827713
20.0971	1.02999	1.32428	0.738532	0.799905	0.742879	0.706936	0.819231
20.1942	0.958469	1.33685	0.692676	0.807354	0.745824	0.808508	0.817336
20.2913	0.957131	1.32092	0.640182	0.841789	0.689975	0.793989	0.818734
20.3883	0.974183	1.3886	0.811187	0.87212	0.792765	1.01133	0.76679
20.4854	1.01337	1.3125	0.633232	0.761335	0.689045	0.915079	0.746804
20.5825	1.06721	1.34857	0.687381	0.865232	0.779585	1.01421	0.790732
20.6796	1.02145	1.36024	0.754988	0.876589	0.701748	1.01031	0.81478
20.7767	1.12983	1.42868	0.78285	0.820463	0.733759	1.05907	0.828886
20.8738	1.18854	1.37093	0.760002	0.894559	0.731586	1.04683	0.81243
20.9709	1.05796	1.35331	0.818728	0.864852	0.734066	1.08689	0.798426
21.068	1.0457	1.29353	0.72486	0.815707	0.734032	1.08253	0.789326
21.165	1.09719	1.24444	0.626853	0.797071	0.689266	1.29976	0.765395
21.2621	1.08319	1.19073	0.816002	0.949894	0.790714	1.27522	0.734051
21.3592	1.00175	1.23067	0.834107	0.929359	0.756535	1.07397	0.735325
21.4563	1.03486	1.35721	0.874168	0.807247	0.848008	1.21428	0.744353
21.5534	0.970303	1.32829	0.842746	0.899437	0.682826	1.23778	0.76889
21.6505	0.967888	1.26154	0.918745	0.915582	0.780211	1.18096	0.76964
21.7476	1.02192	1.27722	0.727146	0.869759	0.738474	1.29141	0.758497
21.8447	0.870016	1.27386	0.813884	0.8563	0.754117	1.14973	0.776941
21.9417	0.881896	1.32177	0.904515	0.898676	0.790815	1.20685	0.787445
22.0388	0.969024	1.33624	1.08194	0.82488	0.770814	1.23051	0.782067
22.1359	0.868854	1.36076	0.72846	0.88045	0.786112	1.24197	0.774319
22.233	0.865711	1.34302	0.797083	0.802767	0.784878	1.23233	0.765386
22.3301	0.890185	1.40788	0.700424	0.834615	0.829743	1.32372	0.792313
22.4272	0.859179	1.35633	0.735494	0.847624	0.710229	1.23665	0.801305
22.5243	0.935402	1.3407	0.703768	0.839018	0.716692	1.3176	0.774425
22.6214	0.932924	1.34135	0.816212	0.973313	0.728984	1.32082	0.79825
22.7184	0.863595	1.32506	0.830051	0.792237	0.776584	1.31456	0.847429
22.8155	0.849987	1.28456	0.763647	0.818467	0.721145	1.25897	0.848677
22.9126	0.990676	1.22277	0.721164	0.883933	0.757459	1.25147	0.839032
23.0097	0.897913	1.24034	0.767153	0.83883	0.74127	1.25251	0.8076
23.1068	0.804702	1.19799	0.802369	0.868291	0.795748	1.24724	0.801003
23.2039	0.843608	1.32647	0.664272	0.779421	0.723809	1.24022	0.806825
23.301	0.807636	1.27944	0.647458	0.833352	0.778295	1.17146	0.826144
23.3981	0.96694	1.23462	0.767607	0.907362	0.76367	1.17572	0.838013
23.4951	0.982034	1.37094	0.758401	0.854348	0.683887	1.12495	0.834984
23.5922	0.928372	1.27495	0.866604	0.843664	0.789334	1.12106	0.828914
23.6893	0.893052	1.27152	0.810114	0.889273	0.778821	1.03442	0.821323
23.7864	0.894338	1.31884	0.795039	0.860797	0.751579	1.08795	0.823578
23.8835	0.904112	1.27733	1.05057	0.869405	0.752873	0.977857	0.829315
23.9806	0.886675	1.22668	0.755761	0.776091	0.743814	1.08308	0.842016
24.0777	0.80681	1.2636	0.8307	0.8628	0.746732	1.03445	0.85348
24.1748	0.904378	1.34413	0.93574	0.894839	0.785694	0.988277	0.864326
24.2718	0.96949	1.47124	0.812794	0.925999	0.816363	1.05835	0.868858
24.3689	0.901636	1.39915	0.69851	0.869537	0.691735	1.02582	0.877082
24.466	0.941813	1.42165	0.725103	0.893973	0.711734	0.892163	0.892692
24.5631	0.993757	1.43245	0.997218	0.927373	0.728802	0.978065	0.862274
24.6602	0.940085	1.38906	0.760629	0.875308	0.764875	0.917265	0.808842
24.7573	0.949662	1.32161	0.633856	0.948465	0.751281	0.865521	0.829961
24.8544	0.893836	1.28575	0.829113	0.886323	0.787613	0.939148	0.82754
24.9515	1.10191	1.34561	0.728983	0.807515	0.65823	0.985134	0.778038
25.0485	0.986279	1.40607	0.763038	0.88027	0.742535	0.933733	0.76967
25.1456	0.93408	1.34305	0.989539	0.882062	0.789309	0.874845	0.781868
25.2427	0.868807	1.36266	0.884599	0.764444	0.730805	0.838636	0.803259
25.3398	1.01235	1.3362	0.698004	0.815945	0.774043	0.8291	0.819894
25.4369	0.940932	1.32562	0.761704	0.852536	0.706832	0.8419	0.827018
25.534	0.903387	1.24697	0.889283	0.837767	0.740297	0.903228	0.824143
25.6311	1.01503	1.32194	0.655621	0.917531	0.761275	0.848648	0.816268
25.7282	0.905616	1.33123	0.720634	0.814823	0.692855	0.87038	0.833522
25.8252	1.0395	1.31704	0.666439	0.906217	0.713743	0.854586	0.840358
25.9223	1.09797	1.239	0.605061	0.862064	0.764419	0.895803	0.826359
26.0194	1.01977	1.21554	0.721542	0.843672	0.723354	0.890137	0.829593
26.1165	0.938133	1.14116	0.758639	0.776081	0.748338	0.85523	0.841443
26.2136	1.0331	1.20967	0.785159	0.836489	0.748546	0.832957	0.879854
26.3107	0.952431	1.21202	0.760645	0.777319	0.689721	0.776942	0.900308
26.4078	1.03249	1.1394	0.755714	0.78144	0.747193	0.786931	0.884846
26.5049	0.907934	1.11901	0.755682	0.876494	0.766963	0.801558	0.86253
26.6019	1.00507	1.1347	0.71769	0.813669	0.742016	0.799513	0.836787
26.699	0.978658	1.12254	0.675964	0.826239	0.759848	0.752813	0.817781
26.7961	0.999909	1.12649	0.749511	0.81397	0.751469	0.792298	0.810154
26.8932	0.999445	1.11961	0.905195	0.837761	0.691164	0.864863	0.825284
26.9903	0.898182	1.18359	0.915658	0.884421	0.769467	0.965218	0.846864
27.0874	0.886219	1.146	0.824173	0.859276	0.875121	0.893654	0.871667
27.1845	0.951148	1.14716	0.815956	0.920867	0.698799	0.838427	0.893285
27.2816	0.972596	1.08744	0.746808	0.960158	0.732947	0.862919	0.903851
27.3786	0.870577	1.08501	0.784815	0.820572	0.721341	0.805717	0.892313
27.4757	0.896534	1.01276	0.697297	0.81286	0.775717	0.831004	0.881637
27.5728	0.849585	1.08599	0.869687	0.871594	0.73834	0.754034	0.871392
27.6699	0.932688	1.09687	0.818984	0.912111	0.758507	0.789252	0.877921
27.767	0.947616	1.01941	0.796573	0.89298	0.769576	0.834334	0.872735
27.8641	0.930545	1.05718	0.86624	0.836459	0.744477	0.721059	0.844121
27.9612	0.911756	1.0287	0.747254	0.777318	0.765603	0.738812	0.8699
28.0583	0.905264	1.0756	0.733427	0.811601	0.717999	0.771326	0.922875
28.1553	0.903186	0.969642	0.861798	0.809533	0.79757	0.744372	0.876809
28.2524	0.894684	1.0163	0.780409	0.90642	0.759764	0.763637	0.853843
28.3495	0.988186	0.980526	0.919097	0.847899	0.796638	0.790861	0.877073
28.4466	1.03049	1.04809	0.718866	0.815045	0.831167	0.758859	0.875407
28.5437	0.959057	1.00946	0.665896	0.870945	0.716035	0.780768	0.861292
28.6408	0.960932	1.03883	0.761302	0.914242	0.719577	0.777251	0.878235
28.7379	0.946292	1.0439	0.909358	0.815631	0.733629	0.774041	0.885765
28.835	0.959272	1.09202	0.88346	0.822055	0.702603	0.831269	0.874471
28.932	0.965173	0.956516	0.840007	0.884741	0.773487	0.784651	0.855764
29.0291	0.893205	1.02268	0.860938	0.887809	0.730969	0.788688	0.833351
29.1262	0.904138	1.03682	0.612895	0.843525	0.684034	0.77487	0.783778
29.2233	0.874425	1.04713	0.746994	0.895205	0.796439	0.788995	0.756683
29.3204	0.938434	1.0069	0.696255	0.846265	0.699206	0.822869	0.774546
29.4175	0.860466	1.00731	0.65888	0.881401	0.689464	0.755523	0.796594
29.5146	0.890273	0.945409	0.67455	0.773521	0.737868	0.760864	0.820734
29.6117	0.842605	1.00587	0.818679	0.870486	0.775491	0.826756	0.823221
29.7087	0.861777	1.03254	0.876907	0.830069	0.69821	0.87936	0.821221
29.8058	0.984177	0.991632	0.7204	0.763478	0.6948	0.923347	0.810247
29.9029	0.89736	0.991787	0.921361	0.799383	0.733227	0.922981	0.806467
30	0.922763	0.996523	0.894251	0.910503	0.689215	0.920111	0.806283
30.0971	0.915494	1.01172	0.817435	0.772632	0.756408	0.972383	0.824977
30.1942	0.870031	1.08086	0.815037	0.870271	0.739927	0.958158	0.832346
30.2913	0.935547	1.05273	0.688965	0.864715	0.749237	0.978961	0.817065
30.3883	0.969893	0.9746	0.671131	0.867271	0.70355	0.917636	0.815988
30.4854	0.901879	1.07707	0.834522	0.866359	0.702496	0.947828	0.822012
30.5825	1.03076	1.07265	0.594491	0.714616	0.760595	1.02328	0.795836
30.6796	1.03972	1.08697	0.905525	0.923943	0.643837	0.928256	0.795463
30.7767	0.945282	1.11931	0.889189	0.842143	0.770148	0.92192	0.846697
30.8738	1.06405	1.08085	0.945276	0.871206	0.708012	0.90865	0.82884
30.9709	1.01722	1.04692	0.972235	0.849577	0.711863	0.918353	0.776436
31.068	0.977892	1.01277	0.847987	0.821704	0.677898	0.927933	0.804671
31.165	0.985573	1.05682	0.753188	0.875099	0.76788	0.91838	0.817155
31.2621	1.00332	1.01576	0.799534	0.820139	0.735048	1.07447	0.798138
31.3592	1.08706	1.10345	0.742192	0.769255	0.75825	1.01842	0.799517
31.4563	1.07454	1.078	0.837322	0.89339	0.745091	0.962175	0.811094
31.5534	1.02161	1.12641	0.773077	0.775394	0.809839	0.965016	0.781622
31.6505	1.05889	1.07839	0.77735	0.77998	0.753404	0.890946	0.770836
31.7476	0.920432	1.03171	0.743437	0.7931	0.724328	0.991262	0.797423
31.8447	1.00249	1.05634	0.971029	0.866722	0.750987	0.914608	0.813638
31.9417	0.913618	0.986673	0.775267	0.810897	0.765204	0.917034	0.824668
32.0388	0.917081	1.07916	0.618425	0.900617	0.777696	0.882868	0.858682
32.1359	0.957709	1.00071	0.809698	0.869923	0.754015	0.876399	0.866556
32.233	1.03676	1.01216	0.758653	0.82307	0.739718	0.88037	0.822153
32.3301	0.939178	1.0765	0.652106	0.823524	0.783811	1.05203	0.804083
32.4272	0.920165	0.984374	0.814574	0.742104	0.75137	0.99231	0.799179
32.5243	0.918271	0.977402	0.860226	0.858722	0.74372	1.01422	0.814876
32.6214	0.980447	1.02727	0.811532	0.854321	0.713286	1.03253	0.818472
32.7184	0.987951	0.998461	0.736228	0.843111	0.702835	0.97991	0.797866
32.8155	0.951804	1.0632	0.691065	0.849936	0.708024	1.00794	0.790652
32.9126	0.972039	1.06682	0.716714	0.852411	0.755928	1.04958	0.790135
33.0097	0.917693	1.00891	0.784386	0.844925	0.707073	1.141	0.805766
33.1068	0.869338	1.01676	0.837249	0.880935	0.712768	1.12902	0.820726
33.2039	0.944023	1.07664	0.772015	0.884694	0.733331	1.07667	0.834341
33.301	0.919231	1.11077	0.888434	0.895556	0.740279	1.10817	0.835268
33.3981	0.970397	1.15149	0.994903	0.849191	0.692843	1.01896	0.829851
33.4951	0.87407	1.04504	0.890768	0.873737	0.745447	1.07907	0.777193
33.5922	0.903791	1.06396	0.838992	0.864795	0.748897	1.0102	0.751125
33.6893	0.974325	1.00223	0.719517	0.760154	0.67234	1.01737	0.77824
33.7864	1.00517	1.11451	0.83822	0.850023	0.768629	1.01581	0.80764
33.8835	0.911914	1.24686	0.806136	0.784885	0.78183	1.00517	0.838182
33.9806	0.934039	1.25551	0.97833	0.799698	0.77557	1.01994	0.795892
34.0777	0.92849	1.18467	0.765242	0.857088	0.762903	0.97289	0.76972
34.1748	0.89423	1.18488	0.784872	0.907779	0.744897	0.912187	0.775784
34.2718	0.833071	1.22554	0.808394	0.935366	0.736023	1.05342	0.769274
34.3689	0.887193	1.19022	0.833903	0.899325	0.734692	0.980144	0.756477
34.466	0.915564	1.14027	1.05624	0.914281	0.733924	1.00514	0.779332
34.5631	0.969104	1.16845	0.907535	0.752265	0.780361	1.04589	0.787865
34.6602	1.10143	1.15811	0.758462	0.842869	0.756562	0.987487	0.767754
34.7573	1.07616	1.09365	1.02792	0.937895	0.713795	0.983729	0.760282
34.8544	1.04983	1.15196	0.879222	0.993336	0.709392	0.969501	0.759129
34.9515	1.08107	1.13753	0.929947	0.891463	0.753122	0.962376	0.752043
35.0485	1.10959	1.16531	0.96057	1.09835	0.654881	0.920991	0.754493
35.1456	1.10608	1.1552	0.784913	0.953416	0.762098	0.914302	0.776016
35.2427	1.02964	1.03144	0.9859	0.896847	0.667528	0.844856	0.786795
35.3398	1.08178	1.0949	0.979513	0.949701	0.715096	0.872467	0.792201
35.4369	1.18271	1.02481	0.870289	0.787494	0.70264	0.861591	0.77074
35.534	1.14349	1.02862	0.656952	0.870213	0.763658	0.822268	0.767167
35.6311	1.02084	1.02753	0.923208	0.821978	0.687106	0.841968	0.799374
35.7282	1.14676	1.06155	0.918111	0.83633	0.806084	0.7662	0.806034
35.8252	1.06655	0.998547	1.08263	0.877994	0.771826	0.845931	0.79992
35.9223	1.11018	0.978082	0.86816	0.900874	0.78946	0.839407	0.792171
36.0194	0.960207	1.01149	1.13452	0.944142	0.745646	0.817085	0.801664
36.1165	1.00615	1.07379	0.873275	0.827729	0.751016	0.807014	0.84564
36.2136	1.03896	0.999497	0.9399	0.874979	0.804791	0.810431	0.833863
36.3107	1.02263	1.03617	0.991621	0.869923	0.837637	0.82253	0.794209
36.4078	0.995285	1.01588	0.997381	0.882433	0.766152	0.796268	0.806654
36.5049	0.846282	1.02605	0.863583	0.801467	0.725939	0.809486	0.80059
36.6019	0.892193	0.995564	1.0375	0.832761	0.844633	0.852611	0.75751
36.699	0.930915	1.05122	1.02561	0.80333	0.750633	0.870799	0.758438
36.7961	0.895226	0.945209	1.10292	0.967703	0.769841	0.797815	0.781371
36.8932	0.980566	1.0475	0.927059	0.859321	0.808078	0.822644	0.792889
36.9903	0.930386	1.00553	1.14496	0.81022	0.849986	0.763744	0.792396
37.0874	0.89458	1.05225	1.04242	0.911374	0.775002	0.68577	0.767881
37.1845	0.926189	1.00154	1.14611	0.894546	0.80426	0.690545	0.770319
37.2816	0.972918	0.987122	1.08508	0.864639	0.768731	0.748352	0.786235
37.3786	0.998617	1.02433	1.41843	0.855411	0.748825	0.74414	0.803438
37.4757	0.854626	0.948612	1.33377	0.891826	0.768083	0.797293	0.810917
37.5728	0.890034	0.911312	1.49228	0.909537	0.776132	0.877789	0.798949
37.6699	0.790472	1.01355	1.35686	0.855436	0.890223	0.80828	0.788935
37.767	0.873664	0.933594	1.3824	0.894936	0.768772	0.776524	0.779898
37.8641	0.936416	1.07706	1.22043	0.853216	0.857568	0.831455	0.799588
37.9612	0.95288	0.994311	1.27975	0.842133	0.822912	0.832158	0.803301
38.0583	0.842949	0.942547	1.34491	0.870484	0.808826	0.925029	0.775061
38.1553	0.971189	0.981926	1.14098	0.872911	0.778888	0.841437	0.756083
38.2524	0.999511	0.956901	1.09742	0.815504	0.81355	0.76046	0.741736
38.3495	1.04391	0.974951	0.902514	0.906178	0.827684	0.765863	0.771219
38.4466	1.04095	1.01844	1.02015	0.783167	0.817216	0.772019	0.777474
38.5437	0.930504	0.997117	1.04494	0.837422	0.813564	0.810965	0.73727
38.6408	0.87667	0.995314	0.807196	0.85816	0.804961	0.723521	0.718257
38.7379	0.855635	1.02492	1.15825	0.969202	0.791765	0.776358	0.70984
38.835	1.0649	1.03649	1.06703	0.881148	0.769571	0.718629	0.758448
38.932	0.97081	0.970258	1.12382	1.00761	0.76509	0.797484	0.784757
39.0291	0.84266	0.984302	1.45064	0.839927	0.832423	0.783379	0.766469
39.1262	0.870555	1.00875	1.24037	0.829908	0.837999	0.821803	0.741367
39.2233	1.03806	0.973685	1.2611	0.854467	0.813354	0.886976	0.712858
39.3204	0.980663	1.00571	1.13566	0.876648	0.786777	0.831686	0.71662
39.4175	0.972388	0.983789	1.08589	0.804213	0.83681	0.819267	0.723465
39.5146	1.05464	1.00036	1.03882	0.887921	0.835902	0.780442	0.736477
39.6117	0.96545	1.02075	1.29405	0.878015	0.812746	0.788408	0.757138
39.7087	0.954042	1.00877	1.14655	0.756324	0.728571	0.754852	0.781625
39.8058	1.01384	0.98012	0.972654	0.797866	0.801099	0.747955	0.755191
39.9029	0.927964	1.07176	1.20616	0.900415	0.786861	0.777716	0.737231
40	1.09571	1.04663	1.35615	0.84956	0.79024	0.751272	0.736216
40.0971	0.918697	1.02599	1.62187	0.903847	0.789715	0.720125	0.743754
40.1942	1.05215	1.04868	1.88856	0.798376	0.866321	0.76801	0.75557
40.2913	0.850293	1.12771	1.3529	0.856616	0.900264	0.824212	0.761647
40.3883	0.878427	1.12348	1.49491	0.975994	0.798132	0.754113	0.759601
40.4854	1.03785	1.13875	1.55359	0.969163	0.836675	0.729436	0.741309
40.5825	1.01524	1.12324	1.33519	0.91777	0.797371	0.739858	0.730039
40.6796	1.02237	1.11111	1.30952	0.893437	0.803669	0.75061	0.722279
40.7767	0.899011	1.16649	1.527	0.932239	0.793249	0.815405	0.733744
40.8738	1.10675	1.16879	1.35887	1.07187	0.899334	0.728572	0.760052
40.9709	1.03712	1.17907	1.39674	0.937062	0.89177	0.751836	0.816046
41.068	1.02761	1.17299	1.47993	0.927507	0.913736	0.753009	0.806312
41.165	1.00667	1.09373	1.28032	0.977423	0.83057	0.784429	0.763714
41.2621	1.01221	1.051	1.16895	0.924672	0.809765	0.72154	0.7741
41.3592	1.06915	1.09205	1.12531	0.921017	0.80044	0.859569	0.770853
41.4563	1.08936	1.13043	1.16075	0.934869	0.855438	0.727339	0.740341
41.5534	1.01799	1.16146	1.10158	0.952152	0.808323	0.810009	0.736951
41.6505	0.927137	1.08183	1.10848	1.0066	0.817767	0.885063	0.747122
41.7476	1.00224	1.13155	1.16787	0.984225	0.774128	1.00088	0.752267
41.8447	1.05018	1.09701	0.891652	0.839433	0.894299	0.931065	0.765006
41.9417	1.04129	1.06745	1.18443	0.99501	0.889598	0.881179	0.792931
42.0388	1.10837	1.03774	0.781166	0.961278	0.78891	0.884095	0.80183
42.1359	1.11084	1.0776	1.02626	0.964566	0.864427	0.97176	0.801216
42.233	0.936685	1.05733	0.958066	1.06007	0.765599	0.93162	0.774752
42.3301	1.18965	1.01942	1.12122	0.93299	0.866944	0.948659	0.761808
42.4272	1.11118	0.991005	1.08146	0.931671	0.871973	0.911589	0.775903
42.5243	1.1503	1.02654	0.962636	0.829637	0.818465	0.990227	0.784718
42.6214	0.998626	0.941187	1.17032	0.942238	0.757387	0.882815	0.790893
42.7184	1.0781	0.991827	1.13557	0.927036	0.804221	0.912673	0.788379
42.8155	1.19151	0.981004	0.947887	0.994166	0.829715	0.952388	0.788591
42.9126	1.04383	0.947677	1.20487	0.92907	0.800157	0.86532	0.794254
43.0097	1.04673	0.921767	0.991631	0.992605	0.746864	0.867735	0.804695
43.1068	0.987543	0.956358	0.862373	0.975379	0.771666	0.841591	0.817524
43.2039	0.910556	0.991312	0.95072	1.11362	0.791828	0.805061	0.789195
43.301	0.901	0.93378	0.897472	1.07931	0.744382	0.948762	0.770166
43.3981	1.02955	0.963144	0.910276	1.00376	0.814912	0.792593	0.769735
43.4951	1.099	0.9382	0.85866	1.01358	0.784983	0.877489	0.79035
43.5922	1.02896	1.00142	1.06297	1.10867	0.789152	0.885184	0.821488
43.6893	1.04915	0.963134	0.911435	0.98294	0.801741	0.805158	0.779113
43.7864	0.973566	0.999457	0.762261	1.02761	0.808535	0.828983	0.761246
43.8835	1.04209	0.968333	0.88013	1.0173	0.835464	0.841734	0.792397
43.9806	1.00781	0.963918	0.950659	1.17806	0.829942	0.849763	0.771533
44.0777	1.07552	1.01294	0.762989	1.00855	0.797694	0.820622	0.724662
44.1748	0.97813	1.04412	0.896267	1.06803	0.758695	0.779209	0.741584
44.2718	1.04196	1.03867	0.628231	0.954509	0.800663	0.799428	0.757542
44.3689	1.01352	1.00221	0.74137	1.03173	0.895673	0.785225	0.771574
44.466	0.946933	1.07644	0.651209	1.01963	0.754777	0.853064	0.786098
44.5631	1.00542	1.01682	0.859793	0.991572	0.794685	0.877895	0.800867
44.6602	1.02348	0.959467	0.7331	1.02914	0.745687	0.851873	0.77721
44.7573	0.947665	0.981418	0.749007	0.986541	0.755083	0.906855	0.765282
44.8544	0.945999	0.993152	0.76132	1.15605	0.743057	0.952054	0.776808
44.9515	1.02606	0.976094	0.703866	1.16606	0.740716	0.845891	0.781688
45.0485	0.989892	0.999574	0.726209	1.28174	0.852345	0.916947	0.783245
45.1456	0.993843	1.00804	0.925008	1.24371	0.864877	0.8586	0.778891
45.2427	0.919157	1.06386	0.79828	1.25402	0.855399	0.938598	0.778136
45.3398	0.901965	0.995377	0.717368	1.27405	0.766389	0.912709	0.78458
45.4369	0.904374	1.0297	0.648922	1.39052	0.792427	0.93818	0.786275
45.534	0.874847	0.997	0.644431	1.40002	0.770124	0.931574	0.785595
45.6311	0.852887	0.986272	0.716708	1.57771	0.818208	0.87785	0.787923
45.7282	0.940585	1.03445	0.720321	1.44729	0.856868	0.955067	0.805313
45.8252	0.930194	1.00857	0.870574	1.28276	0.808587	0.961981	0.85283
45.9223	0.845865	1.00179	0.668366	1.43525	0.83845	0.906646	0.847709
46.0194	0.836189	0.984902	0.800646	1.31549	0.795561	0.90875	0.816268
46.1165	0.853066	1.00894	0.851504	1.45966	0.81284	0.992905	0.815714
46.2136	1.00894	0.960254	0.641376	1.42016	0.832224	0.888012	0.821009
46.3107	0.906522	0.960999	1.00339	1.21879	0.752646	0.8467	0.838001
46.4078	0.847836	0.956724	0.814878	1.32996	0.759481	0.89752	0.832834
46.5049	0.857423	1.0365	0.84328	1.24411	0.839843	0.975431	0.816588
46.6019	0.900149	1.02808	0.949852	1.21123	0.747547	0.834255	0.836717
46.699	0.947485	0.977374	0.703192	1.2503	0.714889	0.882275	0.85242
46.7961	0.916992	1.00432	0.675838	1.25934	0.697288	0.959152	0.859273
46.8932	0.904837	0.942334	0.746008	1.16486	0.735424	0.857844	0.835923
46.9903	0.86912	0.940008	0.847831	1.1926	0.7349	0.854682	0.79747
47.0874	0.938757	1.01347	0.952333	1.27912	0.772691	0.894513	0.785917
47.1845	0.968467	0.958924	0.770732	1.2276	0.740911	0.866917	0.781864
47.2816	0.9192	1.02564	0.764534	1.20643	0.728544	0.93315	0.792813
47.3786	0.737554	1.02876	0.651647	1.22424	0.862597	0.798348	0.775468
47.4757	0.862231	0.989232	0.791451	1.3505	0.726971	0.91263	0.743977
47.5728	0.985985	1.05759	0.758275	1.30305	0.808127	0.835717	0.758232
47.6699	0.897288	1.04326	0.779041	1.2516	0.7777	0.770059	0.767873
47.767	0.86845	1.1061	0.643704	1.37186	0.689745	0.829936	0.768287
47.8641	0.9682	1.03255	0.821822	1.26617	0.746754	0.83644	0.785306
47.9612	0.910511	1.00639	0.796492	1.22176	0.758422	0.77873	0.810626
48.0583	0.926741	1.09181	0.88014	1.1399	0.793081	0.842682	0.775216
48.1553	0.889899	0.999753	0.663261	1.24497	0.761757	0.805501	0.757112
48.2524	0.87611	1.03644	0.722767	1.14149	0.826019	0.770352	0.773619
48.3495	0.900538	1.03814	0.77408	1.14489	0.741175	0.807718	0.781124
48.4466	0.804902	1.04767	0.684939	1.16167	0.793734	0.792092	0.784127
48.5437	0.93596	1.05098	0.799872	1.23155	0.785087	0.804466	0.763118
48.6408	0.878092	0.974179	0.792566	1.37916	0.862935	0.734996	0.766848
48.7379	0.919949	1.05051	0.735933	1.34073	0.860563	0.724611	0.820057
48.835	0.971872	1.15599	0.614277	1.3136	0.764581	0.716387	0.820231
48.932	0.901284	1.24262	0.582516	1.28862	0.825699	0.695911	0.793887
49.0291	0.957236	1.26274	0.759038	1.26007	0.885757	0.736818	0.833592
49.1262	0.955385	1.30234	0.869719	1.20519	0.81058	0.728935	0.849563
49.2233	0.961148	1.27169	0.933526	1.23081	0.757688	0.71032	0.818065
49.3204	0.909985	1.27737	1.12309	1.36217	0.795441	0.676347	0.783053
49.4175	0.815899	1.19102	0.997244	1.15944	0.830246	0.670577	0.746283
49.5146	0.89048	1.2352	1.20746	1.32851	0.804565	0.678285	0.781945
49.6117	0.899693	1.16281	1.18885	1.17337	0.811413	0.745282	0.812749
49.7087	0.880692	1.18947	1.45089	1.09814	0.753653	0.688625	0.833838
49.8058	0.88038	1.14157	1.47526	1.09659	0.808863	0.66027	0.80466
49.9029	0.88605	1.14747	1.0853	1.22346	0.73531	0.658661	0.75035
50	0.899903	1.1465	1.07734	1.25268	0.790005	0.62358	0.792245
50.0971	1.00491	1.03117	1.24529	1.2141	0.76352	0.769183	0.814105
50.1942	0.962014	1.09411	0.99104	1.19989	0.774898	0.847061	0.795891
50.2913	0.908164	1.04264	1.07551	1.20984	0.895416	0.819662	0.804207
50.3883	0.902158	1.10929	0.976351	1.23606	0.793258	0.786181	0.825788
50.4854	0.876655	0.985574	0.97479	1.10626	0.745718	0.774029	0.828334
50.5825	0.891077	0.999576	1.18004	1.07637	0.820433	0.793658	0.837578
50.6796	0.870169	1.01193	1.09055	1.13566	0.817294	0.735045	0.860219
50.7767	0.870368	1.01419	1.07124	1.08365	0.813139	0.760245	0.834215
50.8738	0.918724	0.981068	0.790951	1.0348	0.765502	0.745244	0.78389
50.9709	0.916795	0.996565	0.836015	1.15327	0.783847	0.699305	0.773945
51.068	0.951814	0.932734	0.954991	1.12003	0.834893	0.766603	0.769547
51.165	0.898603	1.00282	0.859747	1.05163	0.746503	0.830735	0.776243
51.2621	0.944357	1.0156	0.859526	1.09367	0.837904	0.72849	0.808355
51.3592	0.980462	0.94547	0.908909	1.11648	0.787854	0.783064	0.853173
51.4563	0.931065	0.962299	0.799621	1.13379	0.867151	0.792298	0.844677
51.5534	0.939383	0.937017	0.756999	1.07843	0.85031	0.883179	0.834567
51.6505	0.872908	0.886485	0.9715	0.980965	0.786628	0.795472	0.821229
51.7476	0.940128	0.918406	0.826007	1.0008	0.812583	0.826798	0.828288
51.8447	0.914266	0.935175	0.894698	1.00425	0.859066	0.896584	0.845545
51.9417	0.962898	0.921692	0.903412	1.12885	0.810662	0.805681	0.837075
52.0388	0.907734	0.907519	0.722818	1.04347	0.867087	0.794608	0.835719
52.1359	0.857699	0.945647	0.850206	1.19464	0.827043	0.842223	0.848593
52.233	0.868731	0.884336	0.928495	1.07676	0.820868	0.853841	0.869235
52.3301	0.911686	0.907466	0.780826	1.16617	0.837824	0.832559	0.893761
52.4272	0.969495	0.889574	0.835252	1.19641	0.808878	0.807451	0.843806
52.5243	0.98113	0.898541	0.767547	1.13955	0.800967	0.727259	0.817124
52.6214	0.851353	0.875298	0.885673	1.12939	0.816725	0.747138	0.83699
52.7184	0.934502	0.914879	0.908858	1.13457	0.85435	0.702816	0.857914
52.8155	0.979921	0.863374	0.93429	1.14684	0.756755	0.844299	0.879368
52.9126	0.941422	0.875805	0.765424	1.16959	0.830596	0.800439	0.84543
53.0097	0.904932	0.878355	0.887947	1.14913	0.807712	0.679309	0.822145
53.1068	0.921258	0.786587	0.701443	1.04491	0.826881	0.74616	0.820167
53.2039	0.942455	0.854536	0.77459	0.980613	0.892012	0.78674	0.834872
53.301	0.979178	0.851164	0.672309	1.04649	0.859167	0.743938	0.857919
53.3981	0.971575	0.878515	0.846333	1.07609	0.821636	0.718571	0.851167
53.4951	0.959431	0.865287	0.758057	1.00543	0.832281	0.784105	0.851139
53.5922	0.91722	0.883738	0.788722	1.02927	0.827584	0.770232	0.864564
53.6893	0.953014	0.86406	0.90364	1.15066	0.953152	0.833167	0.834009
53.7864	0.944875	0.864567	0.72668	1.01948	0.979522	0.700483	0.781465
53.8835	0.971255	0.863243	0.668248	1.03147	0.845262	0.830164	0.798065
53.9806	0.979142	0.864134	0.845235	1.07135	0.869752	0.805116	0.823484
54.0777	0.960856	0.856803	0.932381	1.05886	0.812473	0.74722	0.866541
54.1748	0.986141	0.844571	0.851645	0.947794	0.931194	0.751384	0.865188
54.2718	0.953224	0.924007	0.980061	1.01055	0.882744	0.81941	0.84163
54.3689	0.948816	0.842749	1.05397	1.03757	0.812902	0.87069	0.860567
54.466	1.00457	0.878552	0.904573	1.11635	0.825112	0.826127	0.857967
54.5631	1.02661	0.851941	1.03978	1.06397	0.844163	0.808295	0.812295
54.6602	1.04783	0.913988	1.39105	0.977667	0.802974	0.874704	0.79433
54.7573	1.03901	0.90325	1.23514	0.998488	0.837858	0.841661	0.790217
54.8544	1.01747	0.837942	0.832229	1.10253	0.839121	0.81907	0.798257
54.9515	1.08791	0.892461	0.966694	0.98896	0.810125	0.917502	0.797379
55.0485	1.11698	0.86528	0.933606	0.976233	0.82236	0.960555	0.778663
55.1456	1.14232	0.855901	0.82632	1.03012	0.838367	0.852065	0.784726
55.2427	1.16501	0.913407	0.879939	1.10277	0.844468	0.875748	0.803177
55.3398	1.08362	0.923388	0.99914	0.970393	0.795075	0.751428	0.799488
55.4369	1.07589	0.880993	1.02869	1.01328	0.820331	0.875151	0.796994
55.534	1.002	0.906533	1.06108	1.03889	0.8045	0.755784	0.796893
55.6311	0.977195	0.838881	1.07295	1.08083	0.811877	0.789926	0.825904
55.7282	1.04026	0.857	1.37105	1.03741	0.856512	0.807333	0.869472
55.8252	1.01826	0.866877	0.999231	1.1464	0.793136	0.775389	0.852561
55.9223	0.932232	0.873744	1.0649	0.944274	0.786385	0.742242	0.828222
56.0194	1.01072	0.867883	0.963288	0.999946	0.839459	0.760618	0.789031
56.1165	0.908419	0.886968	1.28424	1.02955	0.838194	0.755592	0.776681
56.2136	0.831873	0.908807	1.25675	0.977842	0.827837	0.72098	0.777753
56.3107	0.953162	0.911452	1.00274	1.07965	0.951712	0.748071	0.813711
56.4078	0.907053	1.06128	1.02692	1.04183	0.812906	0.762395	0.832007
56.5049	0.93989	1.00607	0.934117	1.03943	0.808708	0.78152	0.814977
56.6019	0.980765	0.955064	1.25496	1.06416	0.842248	0.725389	0.793648
56.699	0.828464	0.94496	0.888972	1.09916	0.736817	0.72172	0.77017
56.7961	0.811803	0.917585	0.956865	1.02333	0.746589	0.765818	0.774677
56.8932	0.878148	0.945622	0.971699	1.13596	0.885853	0.754296	0.768974
56.9903	0.865712	0.929387	0.974578	1.09115	0.837851	0.740147	0.742852
57.0874	0.873839	0.847325	0.848246	1.14346	0.791331	0.697447	0.742056
57.1845	0.789383	0.870001	0.858254	1.19097	0.81084	0.728367	0.753923
57.2816	0.874999	0.86718	1.04578	1.12587	0.754795	0.762313	0.771216
57.3786	0.909623	0.861342	0.795138	1.16954	0.829424	0.782231	0.782257
57.4757	0.863163	0.912596	1.00258	1.19989	0.837688	0.75493	0.780794
57.5728	0.8903	0.847141	1.02537	1.23712	0.764154	0.795207	0.784111
57.6699	0.794435	0.856367	0.771287	1.38662	0.782847	0.661697	0.789818
57.767	0.860697	0.895816	1.07097	1.33852	0.788742	0.842936	0.763749
57.8641	0.877823	0.881396	1.05626	1.35638	0.81447	0.738083	0.751058
57.9612	0.817913	0.847146	0.762929	1.31847	0.833656	0.771375	0.765124
58.0583	0.848283	0.850385	0.793929	1.48523	0.833699	0.712045	0.778135
58.1553	0.906568	0.899338	0.795785	1.32347	0.852401	0.78566	0.79062
58.2524	0.96979	0.918965	0.997322	1.35279	0.857497	0.826012	0.806152
58.3495	0.918354	0.833611	0.848247	1.35627	0.836354	0.832639	0.813004
58.4466	0.952912	0.836153	0.808711	1.45664	0.786844	0.791529	0.802497
58.5437	0.854436	0.837379	0.93484	1.34195	0.840522	0.877079	0.795528
58.6408	0.896726	0.893091	0.950169	1.38877	0.803723	0.924954	0.790329
58.7379	0.908599	0.818582	0.857607	1.20893	0.858164	0.907578	0.80156
58.835	0.969092	0.862156	0.739353	1.25552	0.906855	0.953089	0.794538
58.932	0.914274	0.824912	0.987974	1.2199	0.894568	0.876802	0.751013
59.0291	1.01913	0.835917	0.737487	1.28019	0.84077	0.961821	0.740149
59.1262	1.08864	0.90453	0.672766	1.23734	0.803144	0.89683	0.745617
59.2233	1.00405	0.857959	0.83127	1.26433	0.821847	0.929704	0.78243
59.3204	0.955853	0.817195	0.816194	1.13749	0.809428	0.986321	0.805711
59.4175	1.00842	0.875971	1.32147	1.33466	0.858468	0.954741	0.801926
59.5146	0.99286	0.905342	1.16599	1.1711	0.886819	1.08143	0.793228
59.6117	1.12915	0.848604	1.04636	1.21351	0.908787	1.07985	0.782074
59.7087	1.11589	0.9107	0.966612	1.26224	0.914335	1.05183	0.776289
59.8058	1.10995	0.895919	0.881188	1.22549	0.79308	1.01669	0.763391
59.9029	1.01148	0.958792	1.17857	1.22616	0.828371	0.997411	0.736267
60	0.949223	0.906381	1.06236	1.32063	0.856973	0.940145	0.748554
60.0971	0.966433	0.958585	1.20861	1.26068	0.794071	0.96558	0.780546
60.1942	1.01	0.945443	1.13544	1.11803	0.853898	0.905069	0.777709
60.2913	0.919552	0.944206	0.816775	1.18751	0.874291	0.901869	0.772764
60.3883	0.879744	0.930413	0.902031	1.17095	0.816259	0.916529	0.763603
60.4854	0.951552	0.982443	0.891811	1.22311	0.827446	0.886548	0.758508
60.5825	0.888878	0.934859	1.01506	1.25723	0.976711	0.857467	0.755446
60.6796	0.962539	0.989075	1.10121	1.23057	0.871621	0.927013	0.765552
60.7767	0.891811	0.936864	0.956457	1.33756	0.822471	0.942799	0.774453
60.8738	0.913838	0.978722	0.894715	1.3254	0.827491	0.91872	0.780946
60.9709	0.960796	0.924397	0.995861	1.20715	0.839364	0.879693	0.800084
61.068	0.966402	0.968614	0.943939	1.28502	0.849578	0.928865	0.825547
61.165	0.894207	0.930179	1.15431	1.34642	0.828936	0.872387	0.7782
61.2621	0.944626	0.968347	0.881177	1.23625	0.900231	0.914225	0.745637
61.3592	1.00525	0.91897	1.0504	1.33134	0.882144	0.805006	0.742642
61.4563	0.844359	0.961779	0.706634	1.2257	0.869577	0.864397	0.770095
61.5534	0.896664	0.979995	0.832557	1.19317	0.873286	0.850028	0.812773
61.6505	0.977834	0.936382	0.905379	1.28062	0.87417	0.803006	0.786154
61.7476	0.89841	0.993063	0.719525	1.11532	0.857292	0.865675	0.778417
61.8447	0.909683	0.955006	0.872331	1.11539	0.943266	0.79179	0.808445
61.9417	0.859354	0.987236	0.799445	1.31429	0.863082	0.833571	0.797454
62.0388	0.931615	0.981833	0.695031	1.15273	0.821909	0.738781	0.765952
62.1359	0.895201	0.934217	0.798246	1.25115	0.834558	0.813476	0.758705
62.233	0.895168	0.988462	0.698222	1.32325	0.88071	0.789419	0.768702
62.3301	0.918772	0.921906	0.700934	1.23931	0.854551	0.838694	0.813184
62.4272	1.02257	0.920861	0.660308	1.35976	0.914237	0.768847	0.812336
62.5243	0.883388	1.02496	0.794922	1.24107	0.874828	0.749178	0.788822
62.6214	0.872974	0.89269	0.712939	1.16252	0.830274	0.758065	0.803443
62.7184	0.806588	1.01729	0.718596	1.3086	0.862712	0.742747	0.817529
62.8155	0.887676	0.937331	0.667068	1.29939	0.884439	0.774308	0.830545
62.9126	0.898557	0.925635	0.591336	1.23422	0.853457	0.795624	0.82202
63.0097	0.900856	1.0082	0.888914	1.26828	0.836273	0.717676	0.802725
63.1068	0.868292	1.18326	0.772332	1.27843	0.845538	0.752497	0.789767
63.2039	0.92009	1.18459	0.683728	1.21105	0.949453	0.712825	0.795809
63.301	0.933773	1.1748	0.831701	1.26846	0.894351	0.737424	0.839852
63.3981	0.855553	1.13374	0.818643	1.23656	0.824244	0.738301	0.8279
63.4951	0.863533	1.19362	0.803424	1.14959	0.843872	0.727308	0.787952
63.5922	0.877091	1.10071	0.998957	1.29289	0.893685	0.73479	0.802663
63.6893	0.848065	1.05092	0.89064	1.24088	0.882005	0.762787	0.817454
63.7864	0.810413	1.05121	0.849239	1.33271	0.890661	0.753503	0.832403
63.8835	0.880204	1.03508	0.87895	1.26284	0.936802	0.743487	0.850864
63.9806	0.902787	1.02245	1.41326	1.3386	0.888648	0.719932	0.871081
64.0777	0.826205	1.02371	0.988406	1.16165	0.800729	0.699399	0.826375
64.1748	0.820492	1.07711	1.09765	1.30027	0.868968	0.669527	0.79817
64.2718	0.901379	1.01262	1.2802	1.31577	0.896237	0.713463	0.80297
64.3689	0.819918	0.958324	1.11969	1.25031	0.86734	0.771375	0.778947
64.466	0.894291	0.985071	1.06228	1.26475	0.799197	0.688643	0.740514
64.5631	0.90811	0.984479	1.16698	1.38145	0.926532	0.676641	0.775997
64.6602	0.882795	0.987508	1.18433	1.36677	0.849308	0.718499	0.810679
64.7573	0.877971	0.992405	1.05197	1.14008	0.857196	0.682666	0.843756
64.8544	0.918437	0.956127	1.12048	1.34454	0.905792	0.670641	0.822991
64.9515	1.00885	0.975813	1.19127	1.33378	0.910711	0.765386	0.775305
65.0485	0.936585	0.902779	1.17509	1.33808	0.959414	0.699979	0.792834
65.1456	1.03996	0.944425	0.732051	1.35317	0.937265	0.674179	0.811547
65.2427	1.12571	0.933106	0.883623	1.22922	0.910082	0.740506	0.832625
65.3398	1.09008	0.909788	0.850762	1.18196	0.948904	0.704862	0.797503
65.4369	1.05909	0.937478	1.00223	1.30099	0.899835	0.743178	0.73428
65.534	0.957506	0.906124	1.3049	1.19693	0.909304	0.863548	0.787904
65.6311	1.02337	0.932607	0.885257	1.26418	0.828991	0.752553	0.827549
65.7282	1.0377	0.905493	0.918239	1.17792	0.914777	0.853259	0.839237
65.8252	1.01998	0.956232	0.997285	1.11213	0.92472	0.871907	0.828943
65.9223	0.870437	0.933843	1.10857	1.1668	0.855252	0.860007	0.807658
66.0194	0.924452	0.898181	1.08691	1.14844	0.857258	0.812932	0.797015
66.1165	0.957255	0.923907	0.924152	1.1661	0.937362	0.929919	0.787283
66.2136	0.98626	0.886189	1.09459	1.05618	0.912973	0.868609	0.779372
66.3107	0.953038	0.886846	0.819021	1.19731	0.906577	0.850795	0.78912
66.4078	0.89634	0.873017	0.872846	1.104	0.915135	0.914929	0.807697
66.5049	0.86049	0.852592	1.06944	1.01363	0.864101	0.957031	0.841286
66.6019	0.94258	0.857822	1.37073	1.13087	0.805544	0.963554	0.845359
66.699	0.882811	0.835438	1.02688	1.12643	0.904502	0.996971	0.790399
66.7961	0.837707	0.897234	1.07911	1.09347	0.865333	0.909068	0.770778
66.8932	0.800421	0.830203	0.93737	1.12201	0.877859	1.03047	0.768826
66.9903	0.899631	0.844194	1.00653	1.13448	0.891886	1.04309	0.775673
67.0874	0.90735	0.836488	0.89624	1.20724	0.88636	1.08974	0.790077
67.1845	0.996457	0.830477	0.853075	1.09154	0.828357	1.08151	0.819593
67.2816	0.964081	0.796348	0.76727	1.17056	0.898711	1.08404	0.818915
67.3786	0.932891	0.785996	0.788287	1.13678	0.930719	1.08581	0.80314
67.4757	0.804951	0.891589	0.848339	1.06902	0.90939	1.19205	0.757722
67.5728	0.853908	0.876013	0.68266	1.10245	0.874668	1.11735	0.746009
67.6699	0.854328	0.862827	0.850651	1.09738	0.844097	1.10365	0.801703
67.767	0.87013	0.819958	0.829534	1.06059	0.8829	1.13937	0.802407
67.8641	0.908606	0.845816	0.867562	1.12132	0.925452	1.17041	0.775615
67.9612	0.838938	0.878621	0.745523	1.06587	0.936795	1.06045	0.776023
68.0583	0.873536	0.833372	0.71635	1.02538	0.918962	1.07523	0.783613
68.1553	0.896329	0.856213	0.894443	1.04016	0.944652	1.12654	0.805566
68.2524	0.858888	0.878925	0.887823	1.04423	0.918769	1.12089	0.807421
68.3495	0.928875	0.835235	1.05772	1.13703	0.87459	1.10706	0.799226
68.4466	0.942111	0.894137	0.674617	1.01233	0.972798	1.08858	0.789163
68.5437	0.961008	0.860839	0.908405	1.0857	0.953759	1.05006	0.785546
68.6408	0.992631	0.859038	0.900637	1.12769	0.9473	1.09648	0.794825
68.7379	0.934846	0.863093	0.933267	1.13798	0.867693	1.12237	0.781475
68.835	0.993902	0.878756	0.964561	1.13242	0.948214	1.17864	0.756811
68.932	0.87685	0.874392	1.05112	1.0775	0.911551	1.18736	0.767826
69.0291	0.929065	0.8728	0.952889	1.13652	1.01936	1.1391	0.770711
69.1262	0.909658	0.807017	1.11397	1.09245	0.92931	1.08206	0.757336
69.2233	0.921782	0.887425	1.0105	1.08175	0.937681	1.03706	0.751681
69.3204	0.842841	0.852141	0.963325	0.933081	1.01203	1.07467	0.749884
69.4175	0.901742	0.877794	0.860985	1.1419	0.933085	1.09291	0.757506
69.5146	0.961514	0.820348	1.25075	1.07613	0.876017	1.01776	0.758607
69.6117	1.04662	0.815071	0.953474	1.05438	0.913721	1.11329	0.746668
69.7087	1.00941	0.897991	0.971123	0.956248	0.879614	0.940623	0.746859
69.8058	1.10262	0.844339	0.943428	1.07644	0.902514	0.99169	0.753116
69.9029	1.09491	0.826598	1.13385	1.1518	0.846584	0.982962	0.771336
70	1.02417	0.80772	1.17514	1.17305	0.82448	1.08389	0.772616
70.0971	1.07213	0.810664	1.40208	1.10643	0.930108	1.03899	0.740014
70.1942	1.04397	0.848401	0.958144	1.17172	0.844425	0.94395	0.736322
70.2913	1.04846	0.816632	0.925273	1.01571	0.933782	0.970888	0.747085
70.3883	1.05275	0.851288	1.09649	1.07718	0.939295	1.03466	0.754517
70.4854	1.17767	0.822454	0.814434	1.00774	0.958176	0.970566	0.761521
70.5825	1.11572	0.791498	1.09344	0.945091	0.906187	0.947316	0.76767
70.6796	1.32353	0.866952	1.21378	1.05343	0.873074	0.918656	0.794803
70.7767	1.14828	0.792846	1.17312	1.03246	0.992396	0.87212	0.832428
70.8738	1.26165	0.848391	1.09775	0.988409	0.916516	0.955681	0.795788
70.9709	1.09763	0.793853	1.00681	1.06008	0.960937	0.873463	0.763967
71.068	0.980713	0.80759	1.19298	1.10098	0.951578	0.866969	0.74178
71.165	1.12249	0.866949	0.795604	1.17451	0.93988	0.817287	0.737855
71.2621	1.17016	0.85633	1.12497	1.01314	0.898009	0.783661	0.743062
71.3592	1.21062	0.781595	1.05487	1.1325	0.97088	0.837744	0.754944
71.4563	1.18851	0.797138	0.857836	1.1808	0.91392	0.781712	0.773935
71.5534	1.27694	0.850857	1.10056	1.23545	0.904324	0.788001	0.807144
71.6505	1.06896	0.841738	0.9602	1.09293	0.968447	0.733871	0.795467
71.7476	1.15305	0.886283	0.812247	1.19588	0.933351	0.767599	0.761349
71.8447	1.18042	0.788791	1.01361	1.25687	1.04605	0.788356	0.75213
71.9417	1.1915	0.826735	1.00922	1.1478	0.991867	0.860312	0.73921
72.0388	1.10133	0.804073	0.745195	1.23759	1.07085	0.90516	0.718884
72.1359	1.205	0.816767	1.00525	1.13146	0.942402	0.826443	0.736649
72.233	1.09682	0.780317	0.760869	1.03229	0.907779	0.817021	0.773458
72.3301	1.21184	0.798441	0.9745	1.18342	0.957717	0.788824	0.749301
72.4272	1.13233	0.810139	1.01023	1.17554	0.952839	0.774205	0.738974
72.5243	1.15821	0.771315	0.882265	1.02783	0.921157	0.747145	0.756309
72.6214	1.05068	0.787503	1.21702	1.15373	0.951176	0.756339	0.760225
72.7184	1.11097	0.784826	1.23309	1.13194	0.958093	0.756709	0.75743
72.8155	1.02577	0.845976	1.31067	1.16163	0.906926	0.779762	0.77528
72.9126	1.02715	0.812194	1.32749	1.16443	0.946504	0.692914	0.789919
73.0097	0.949696	0.764013	1.41455	1.11494	0.922153	0.709786	0.798137
73.1068	0.928302	0.819719	1.43761	1.18776	0.950998	0.7892	0.790761
73.2039	0.904001	0.863841	1.181	1.28418	0.949278	0.764635	0.775588
73.301	0.780634	0.822605	0.746883	1.16976	0.835845	0.773938	0.737641
73.3981	0.885219	0.825889	1.33433	1.18873	0.813194	0.747253	0.733328
73.4951	0.954561	0.861735	1.23395	1.06642	0.914863	0.717527	0.796282
73.5922	0.994552	0.815106	1.32569	1.20727	0.847223	0.765575	0.807895
73.6893	0.901535	0.821497	1.19968	1.18126	0.923646	0.805942	0.793838
73.7864	0.863226	0.78923	1.04654	1.10212	0.999213	0.730645	0.816223
73.8835	0.865163	0.854871	1.31864	1.19895	0.961234	0.773475	0.817667
73.9806	0.997503	0.892902	1.30696	1.0323	0.851069	0.846888	0.777224
74.0777	0.866822	0.788295	0.922593	1.13625	0.927818	0.794652	0.794033
74.1748	0.862794	0.816607	1.2501	1.105	0.899628	0.762081	0.839467
74.2718	0.915609	0.823961	0.962348	1.06338	0.946857	0.805003	0.775717
74.3689	0.823273	0.849568	0.897252	1.01763	0.909743	0.828676	0.746948
74.466	0.782553	0.806608	1.1615	1.00915	0.86617	0.830368	0.788138
74.5631	0.880792	0.81934	1.03146	1.05801	0.844483	0.808545	0.776985
74.6602	0.932046	0.785294	0.798692	1.11418	0.908823	0.846425	0.739659
74.7573	0.901073	0.806656	0.859346	0.980506	0.843477	0.824668	0.769091
74.8544	0.881693	0.862981	0.796173	1.00015	0.798403	0.865867	0.787169
74.9515	0.958296	0.809199	0.896491	1.04761	0.910415	0.791691	0.782539
75.0485	0.950263	0.79264	1.27823	0.984035	0.929558	0.785305	0.775068
75.1456	0.956146	0.851717	0.986652	1.01941	0.924489	0.789954	0.766176
75.2427	1.00965	0.875542	1.06179	1.12494	1.02178	0.795839	0.772499
75.3398	0.930417	0.823682	1.11657	1.1444	0.922802	0.886223	0.782148
75.4369	0.973374	0.809286	0.913687	1.12225	0.905419	0.970086	0.798447
75.534	1.03977	0.835436	1.20488	1.17605	0.961472	0.871211	0.803826
75.6311	0.984454	0.774871	1.20113	1.13334	0.991836	0.86925	0.803745
75.7282	1.03593	0.840669	1.11769	1.12868	0.951768	0.913403	0.779558
75.8252	1.06604	0.835005	1.11154	1.21796	0.903481	0.883354	0.763532
75.9223	1.03781	0.853638	1.22811	1.06723	0.93148	0.949646	0.763829
76.0194	0.990882	0.837397	1.15872	1.18354	0.965682	0.883942	0.754596
76.1165	1.11454	0.888876	0.952516	1.17749	0.950429	0.861984	0.740598
76.2136	1.0249	0.850426	0.878118	1.13991	0.990194	0.886652	0.763326
76.3107	1.05295	0.854457	1.14681	1.25856	0.90538	0.886195	0.777221
76.4078	1.0433	0.857954	0.893737	1.08918	0.889035	0.85994	0.773451
76.5049	1.05026	0.921349	1.10524	1.00266	0.949761	0.80545	0.757854
76.6019	0.956471	0.916942	0.829515	1.08857	0.983054	0.758211	0.736343
76.699	1.07427	0.873562	0.960608	1.21477	0.925891	0.709743	0.764896
76.7961	1.05188	0.87554	0.941128	1.03003	0.941554	0.750171	0.776
76.8932	1.04912	0.880037	0.879725	1.07598	0.956413	0.805478	0.752208
76.9903	1.0858	0.880126	1.13194	1.1587	0.950126	0.732694	0.771303
77.0874	0.891265	0.855947	1.127	1.09955	0.924634	0.806865	0.811842
77.1845	0.956158	0.82265	0.919446	1.02051	0.936162	0.722282	0.792803
77.2816	0.945771	0.854348	1.14887	1.05915	0.938818	0.712151	0.785853
77.3786	0.853433	0.822481	1.0656	1.19729	0.982753	0.779355	0.803082
77.4757	0.963343	0.832935	1.14915	1.14795	0.934094	0.722814	0.788901
77.5728	1.10283	0.811367	1.0929	1.2109	0.961642	0.71958	0.759015
77.6699	0.850862	0.831892	1.12658	1.16686	0.871181	0.743622	0.753834
77.767	0.841967	0.817686	0.927695	1.15216	0.868161	0.719709	0.756204
77.8641	0.864008	0.830003	0.863655	1.19331	0.932342	0.680177	0.773678
77.9612	0.933135	0.825097	0.75383	1.05795	0.966899	0.768793	0.776598
78.0583	0.870762	0.860318	0.787629	1.15038	0.977631	0.738736	0.77224
78.1553	0.942412	0.873537	0.847555	1.11163	0.948586	0.73753	0.776049
78.2524	0.949973	0.783219	0.817332	1.27721	0.931633	0.765377	0.784237
78.3495	0.880421	0.810228	0.675299	1.18704	0.916827	0.713211	0.801187
78.4466	0.971627	0.839573	1.02126	1.12346	0.944744	0.711768	0.802593
78.5437	0.99821	0.889372	0.780568	1.21554	0.970256	0.762601	0.796229
78.6408	0.871525	0.824815	1.16373	1.12051	0.915084	0.730739	0.827918
78.7379	0.924299	0.81162	1.37411	1.20904	0.939956	0.733138	0.835947
78.835	0.955778	0.82001	1.19319	1.0852	0.935712	0.679933	0.796655
78.932	0.928023	0.877872	1.07462	1.0877	0.939437	0.706011	0.784597
79.0291	0.841596	0.810263	1.29457	1.1673	0.920438	0.774648	0.786157
79.1262	0.96012	0.836652	1.06986	1.22347	0.962039	0.70637	0.77234
79.2233	0.797355	0.819046	1.42638	1.27206	0.86726	0.701965	0.777802
79.3204	0.885282	0.771225	1.45238	1.08163	0.970588	0.704881	0.82182
79.4175	0.937251	0.841469	1.08446	1.26964	0.90519	0.78157	0.839281
79.5146	0.894564	0.784116	0.948276	1.25252	0.879924	0.734034	0.843465
79.6117	0.887155	0.781899	1.36869	1.20967	0.92281	0.697726	0.807843
79.7087	0.91042	0.835174	0.630845	1.17989	0.865589	0.735556	0.79442
79.8058	0.892498	0.855865	0.94468	1.12615	0.981402	0.707182	0.825393
79.9029	0.94544	0.818951	0.962434	1.2071	0.882727	0.68906	0.809897
80	0.903807	0.777512	1.10941	1.17686	0.899	0.714352	0.771168
80.0971	0.81988	0.834816	0.659395	0.968725	0.938099	0.733514	0.791836
80.1942	0.901576	0.814181	0.981764	1.13923	0.902502	0.661996	0.797755
80.2913	0.921293	0.882574	0.694711	1.03646	0.990597	0.691225	0.774175
80.3883	0.899878	0.82888	1.11484	1.11153	0.904457	0.659611	0.770844
80.4854	0.868621	0.842034	1.06245	0.962321	0.906513	0.683741	0.777637
80.5825	0.903591	0.83228	0.988622	1.10774	0.986366	0.62731	0.774175
80.6796	0.890052	0.755894	0.83259	0.927027	0.994865	0.660727	0.780841
80.7767	0.844681	0.795415	1.12323	1.03541	0.944937	0.641002	0.807762
80.8738	0.842276	0.763789	1.11685	1.00837	1.00536	0.653818	0.801241
80.9709	0.881187	0.740918	0.92744	0.954087	1.01422	0.662991	0.777998
81.068	0.840028	0.835965	0.978638	1.06376	0.95939	0.651889	0.768076
81.165	0.87002	0.793935	0.738789	1.13034	0.899636	0.681474	0.766078
81.2621	0.844647	0.783428	0.960997	1.2291	0.99794	0.688361	0.77993
81.3592	0.834307	0.764007	0.942496	1.17721	0.878764	0.662181	0.800534
81.4563	0.84325	0.78363	0.743064	1.0277	0.931029	0.642951	0.824513
81.5534	0.851584	0.764836	0.993105	1.1138	0.935344	0.712012	0.782825
81.6505	0.96301	0.781343	1.00634	0.984482	0.977505	0.683038	0.755949
81.7476	0.900145	0.762509	1.2376	1.02047	0.881073	0.622141	0.758695
81.8447	0.855075	0.798344	0.823927	1.13283	1.03666	0.650143	0.765404
81.9417	0.883691	0.79407	0.791918	1.0754	0.962472	0.679851	0.774095
82.0388	0.843681	0.85226	0.892912	1.02282	0.914711	0.694935	0.750404
82.1359	0.928247	0.800712	0.796952	1.07904	0.980903	0.637015	0.736743
82.233	0.85735	0.832843	0.713949	1.18276	0.96426	0.727147	0.743141
82.3301	0.913777	0.81175	1.21113	1.18276	1.02533	0.6767	0.770315
82.4272	0.814747	0.842097	0.757074	1.13171	0.913444	0.674209	0.807878
82.5243	0.830739	0.853578	0.975578	1.04976	0.839689	0.706678	0.784678
82.6214	0.932132	0.784148	0.923909	1.17161	0.9788	0.728051	0.779318
82.7184	0.907761	0.818042	1.14816	1.13077	0.980111	0.704113	0.809639
82.8155	0.84385	0.740983	0.813576	1.30933	0.910349	0.733311	0.81962
82.9126	0.86129	0.851791	1.06776	1.2802	0.957352	0.774751	0.819433
83.0097	0.849289	0.889708	0.973704	1.19367	0.912926	0.797306	0.792843
83.1068	0.824715	0.906926	0.861601	1.16365	0.869905	0.762318	0.783879
83.2039	0.893298	0.908923	0.874321	1.13285	0.874102	0.807121	0.810167
83.301	0.898737	0.892244	0.911436	1.18969	0.941641	0.714687	0.78082
83.3981	0.855706	0.852928	0.863688	1.22611	0.865826	0.751717	0.723654
83.4951	0.849772	0.882584	0.866584	1.15791	0.890195	0.738478	0.755843
83.5922	0.902441	0.862311	0.837956	1.18126	0.849877	0.772653	0.770643
83.6893	0.839956	0.826805	0.850237	1.19431	0.924495	0.753931	0.750663
83.7864	0.888382	0.885314	0.738217	1.24093	0.793212	0.723587	0.759011
83.8835	0.87871	0.882879	0.955998	1.13547	0.797156	0.764296	0.781524
83.9806	0.810052	0.841559	0.707309	1.12786	0.822483	0.808023	0.745657
84.0777	0.904944	0.824979	0.98136	1.12522	0.788155	0.760457	0.73312
84.1748	0.875815	0.878054	0.800664	1.06956	0.780679	0.823462	0.767246
84.2718	0.84326	0.820187	0.864012	1.23589	0.862381	0.804613	0.782453
84.3689	0.88704	0.810831	1.04823	1.08409	0.798375	0.825307	0.788202
84.466	0.979435	0.872309	1.02123	1.18043	0.851403	0.79265	0.761331
84.5631	0.884833	0.816548	1.11008	1.15981	0.859935	0.810816	0.75567
84.6602	0.97378	0.909257	0.962193	1.11122	0.798581	0.759207	0.792427
84.7573	0.976477	0.805527	1.02294	1.18905	0.86204	0.746825	0.797245
84.8544	0.973111	0.851866	0.85043	1.16682	0.823093	0.768101	0.786092
84.9515	1.03533	0.824909	1.09449	1.15853	0.826533	0.799273	0.801794
85.0485	1.03772	0.9183	0.772027	1.19289	0.885675	0.745974	0.818857
85.1456	1.03963	0.871675	0.875306	1.19705	0.88999	0.78992	0.838642
85.2427	1.04607	0.881092	1.10998	1.01318	0.927445	0.785513	0.852715
85.3398	0.985053	0.876068	0.983808	1.2322	0.895395	0.825314	0.863933
85.4369	1.15368	0.827062	0.70696	1.15155	0.846518	0.866079	0.827537
85.534	1.06399	0.886217	1.00427	1.18295	0.851284	0.82103	0.808124
85.6311	1.06416	0.807847	0.856112	1.22289	0.867296	0.78925	0.822678
85.7282	1.13799	0.92489	0.935963	1.38656	0.844881	0.783008	0.831829
85.8252	1.15737	0.854068	0.989215	1.46288	0.924642	0.753958	0.838278
85.9223	1.22123	0.896821	0.892354	1.40265	0.878874	0.69192	0.819771
86.0194	1.154	0.870793	1.04281	1.28118	0.894106	0.70155	0.81498
86.1165	1.09026	0.932259	0.940338	1.34228	0.882238	0.718061	0.837625
86.2136	1.21612	0.896177	0.760204	1.40604	0.941566	0.716548	0.83
86.3107	1.25879	0.917423	0.778143	1.24255	0.889963	0.755833	0.807239
86.4078	1.11591	0.840669	0.605058	1.3152	0.91061	0.686247	0.822812
86.5049	1.28341	0.911322	0.855715	1.21779	0.838995	0.721713	0.843114
86.6019	1.14815	0.911931	0.783654	1.42144	0.924551	0.684848	0.872874
86.699	1.0471	0.885026	0.807819	1.41576	0.869058	0.669049	0.844455
86.7961	1.01899	0.826924	0.756451	1.36357	0.867452	0.719904	0.786946
86.8932	1.08798	0.894579	0.72949	1.35542	0.844501	0.731783	0.789478
86.9903	1.25309	0.859693	0.949758	1.22048	0.912037	0.660929	0.7942
87.0874	1.15896	0.901199	0.865293	1.37603	0.891576	0.742632	0.803302
87.1845	1.1353	0.948066	0.88228	1.32763	0.944372	0.693997	0.804232
87.2816	1.21207	0.911662	0.957569	1.22568	0.919555	0.694942	0.801077
87.3786	1.16031	1.0097	0.740563	1.20168	0.875401	0.733852	0.756244
87.4757	1.04682	0.975558	0.738933	1.32215	0.919487	0.734645	0.736628
87.5728	1.07957	0.999182	1.06821	1.25127	0.970843	0.760573	0.767446
87.6699	1.07654	0.966651	1.06605	1.21839	0.937586	0.754587	0.784853
87.767	0.975539	0.974273	0.872869	1.09836	0.966289	0.726106	0.795553
87.8641	0.946178	0.959373	0.797238	1.27189	0.916507	0.760081	0.777597
87.9612	0.970815	0.938204	0.947809	1.3228	0.931881	0.730709	0.76387
88.0583	0.941276	0.918691	1.03325	1.34516	0.988676	0.757919	0.758602
88.1553	0.924025	0.886189	0.828238	1.4822	0.951178	0.773589	0.759244
88.2524	0.913302	0.930211	0.765658	1.37524	0.960262	0.883659	0.76284
88.3495	0.839487	0.878915	1.07301	1.42414	0.872191	0.828327	0.783587
88.4466	0.899858	0.892382	0.801812	1.34148	0.931312	0.818766	0.78471
88.5437	0.866558	0.912127	0.959903	1.31474	0.887504	0.852326	0.746583
88.6408	0.847582	0.889143	1.13855	1.26577	0.991707	0.771302	0.746853
88.7379	0.778326	0.894919	1.4292	1.2737	0.920057	0.813064	0.766321
88.835	0.790194	0.882196	0.931339	1.28517	0.996526	0.761632	0.760503
88.932	0.812711	0.853201	0.942137	1.25042	0.830961	0.771805	0.7475
89.0291	0.798603	0.917386	0.947627	1.33745	0.932235	0.749055	0.720127
89.1262	0.871614	0.87231	1.42271	1.09064	0.973317	0.83727	0.706156
89.2233	0.873064	0.907101	0.961499	1.23738	0.861149	0.853587	0.698886
89.3204	0.934104	0.894875	1.168	1.16564	0.867237	0.767198	0.721868
89.4175	0.813128	0.958822	1.37686	1.05674	0.856878	0.885367	0.744033
89.5146	0.90593	0.831343	1.08533	1.23257	0.881691	1.01656	0.764562
89.6117	0.89722	0.896521	0.999225	1.11547	0.952421	0.999983	0.768529
89.7087	0.868364	0.864628	1.0864	1.19537	0.945812	1.01336	0.764215
89.8058	0.834726	0.892068	1.18994	1.11803	0.839376	1.00411	0.785766
89.9029	0.864947	0.842824	1.10922	1.15767	0.918358	0.989775	0.794711
90	0.920882	0.834736	1.05883	1.08692	0.925021	1.08307	0.778443
90.0971	0.911079	0.844733	0.765229	1.26395	0.895854	1.10332	0.785136
90.1942	0.931441	0.873929	0.851226	1.04229	0.909066	1.01243	0.80331
90.2913	0.893267	0.834215	1.0347	1.10131	0.929168	1.00992	0.776604
90.3883	0.870568	0.827622	0.900601	1.1108	0.808572	1.03694	0.749493
90.4854	0.977513	0.85561	1.08771	1.01939	0.88793	1.11128	0.721574
90.5825	0.88399	0.853628	0.811782	1.10445	0.902323	1.01481	0.728122
90.6796	0.933826	0.878998	0.786615	1.1418	0.918328	0.993127	0.751902
90.7767	0.943125	0.795942	1.07942	1.1195	0.864121	1.11003	0.753545
90.8738	1.01926	0.845218	0.974126	1.08924	0.835976	1.0057	0.749506
90.9709	0.881912	0.868075	0.964392	1.24582	0.915409	1.01744	0.734101
91.068	0.867778	0.851022	1.0735	1.24509	0.847284	0.991681	0.727257
91.165	0.848514	0.909983	0.686203	1.33725	0.869586	1.03527	0.724692
91.2621	0.965087	0.812901	0.711184	1.28032	0.803895	1.01551	0.757435
91.3592	0.884611	0.800748	0.818175	1.32039	0.897032	1.01533	0.766371
91.4563	0.861042	0.833276	1.15202	1.26019	0.939039	1.06031	0.727695
91.5534	0.900887	0.849906	0.781442	1.30888	1.02133	1.01885	0.744212
91.6505	0.872956	0.821131	0.807134	1.21929	0.92904	0.968632	0.788325
91.7476	0.945736	0.85158	0.828732	1.06378	0.928061	0.937152	0.77314
91.8447	0.975477	0.805578	0.981751	1.18286	1.01272	0.956719	0.758865
91.9417	0.969544	0.794047	0.874848	1.08216	0.974778	0.882985	0.746408
92.0388	0.948688	0.820805	1.01449	1.14308	0.919067	0.910466	0.771368
92.1359	0.936874	0.796605	0.889115	1.14013	0.988381	0.908257	0.815035
92.233	0.864078	0.851812	0.909617	1.09325	0.905055	0.991514	0.787921
92.3301	0.83776	0.799806	0.905534	1.12243	0.929684	0.966883	0.777046
92.4272	0.875154	0.811247	0.922558	1.21346	0.887897	0.861434	0.798648
92.5243	0.910331	0.740783	0.89553	1.24136	0.879077	0.883354	0.7779
92.6214	0.895773	0.857611	0.852798	1.23316	0.980025	0.917577	0.735978
92.7184	0.865839	0.848576	1.12368	1.18306	0.859885	0.847881	0.736767
92.8155	0.855536	0.818376	0.97517	1.22826	0.918974	0.826874	0.736798
92.9126	0.988858	0.832327	0.889616	1.11746	0.852814	0.849602	0.735311
93.0097	0.915651	0.815449	1.03083	1.18412	0.91072	0.897565	0.722191
93.1068	0.953486	0.818361	0.87704	1.36642	0.937437	0.870862	0.703255
93.2039	0.900944	0.832111	0.974046	1.29385	0.900586	0.840532	0.722509
93.301	1.05859	0.799183	0.671857	1.2736	0.927255	0.82935	0.733378
93.3981	0.982338	0.797576	0.845811	1.20043	0.869914	0.819161	0.727478
93.4951	0.975174	0.797803	0.763367	1.25725	0.906614	0.886369	0.73972
93.5922	0.870897	0.830125	1.23421	1.33944	0.831745	0.726716	0.761033
93.6893	1.01834	0.802506	1.04402	1.30697	0.859305	0.777904	0.750214
93.7864	0.897748	0.84532	1.29966	1.38603	0.953544	0.823856	0.744373
93.8835	0.902367	0.801114	0.951434	1.35293	0.842638	0.795948	0.74849
93.9806	1.02463	0.794395	1.60575	1.3503	0.789226	0.80705	0.774297
94.0777	0.981237	0.801407	1.03645	1.29961	0.873299	0.786515	0.810948
94.1748	0.967903	0.788557	1.55408	1.27682	0.821555	0.832797	0.809123
94.2718	1.02651	0.817339	1.29788	1.29501	0.895069	0.882749	0.806099
94.3689	0.957065	0.773699	0.901905	1.27084	0.824523	0.751821	0.800681
94.466	1.07567	0.760805	0.880059	1.25673	0.865983	0.763123	0.82958
94.5631	0.986922	0.770565	0.90755	1.20825	0.867468	0.768857	0.875637
94.6602	1.02224	0.829486	1.25224	1.22752	0.842942	0.812999	0.868591
94.7573	0.986465	0.77751	0.947093	1.11981	0.825054	0.767906	0.85387
94.8544	0.983373	0.765571	1.10214	1.23196	0.814019	0.715503	0.8238
94.9515	1.01483	0.783612	0.996777	1.18545	0.863777	0.765938	0.80619
95.0485	0.982679	0.774645	0.933271	1.24096	0.856737	0.797239	0.79481
95.1456	1.02589	0.781301	0.864785	1.2887	0.814606	0.812946	0.78613
95.2427	0.988041	0.7473	0.800045	1.29661	0.818002	0.723102	0.786786
95.3398	1.05896	0.741869	0.684318	1.10893	0.895422	0.79296	0.806113
95.4369	0.970403	0.828384	0.761009	1.2196	0.803898	0.748033	0.811337
95.534	0.89433	0.794092	0.801025	1.21399	0.780081	0.760199	0.809508
95.6311	0.901396	0.790782	0.93111	1.10189	0.799546	0.722899	0.777109
95.7282	0.903825	0.794963	0.831505	1.21632	0.81614	0.794354	0.759594
95.8252	0.98553	0.794009	1.20602	1.12681	0.83485	0.752066	0.77185
95.9223	0.949934	0.771282	0.879895	1.18481	0.825764	0.837261	0.781112
96.0194	0.984935	0.825612	0.891755	1.08981	0.770347	0.814178	0.788877
96.1165	0.962424	0.790968	0.743259	1.19298	0.775855	0.762057	0.777081
96.2136	0.93913	0.809902	1.00788	1.14133	0.901388	0.799061	0.780524
96.3107	0.805318	0.745282	0.994553	1.14301	0.901319	0.670513	0.814446
96.4078	0.951104	0.790081	0.964768	1.14422	0.8067	0.732407	0.811553
96.5049	0.900255	0.818705	0.865244	1.19527	0.873376	0.761278	0.790253
96.6019	0.874274	0.828908	1.03047	1.13002	0.853579	0.812826	0.764602
96.699	0.936881	0.828078	0.827958	1.03771	0.857354	0.785469	0.763774
96.7961	0.919134	0.753367	1.49825	1.04202	0.89068	0.826329	0.812593
[truncated: 3 more rows]

## Sheet: Fig 4d
Figure 4 d
	LC axon lap binned F
lap from novel switch	1	2	3	4	5	6	7	8	9	10	11	12	13	14	15	16	17	18	19	20	21	22	23	24	25	26	27	28	29	30	31	32	33	34	35	36	37	38	39	40	41	42	43	44	45	46	47	48	49
-5	0.970342	1.23646	1.03409	1.01379	1.07249	1.03854	1.06982	1.06124	1.05246	1.02217	1.06337	1.24192	1.02007	0.901919	0.96561	1.01233	1.01698	0.848845	0.913399	0.932101	0.943923	1.29299	1.02791	1.05691	0.87716	0.857997	0.974683	1.04778	1.00837	1.06036	1.08927	1.12087	1.03363	1.00218	1.06853	0.924125	1.09455	0.959287	1.04964	1.01527	1.01795	1.02716	1.08067	1.08743	1.16751	0.982906	1.10268	1.02435	1.03907
-4	0.826882	1.19691	1.03227	0.9844	1.04599	1.04094	0.991299	1.048	1.06789	1.03229	1.05549	1.11492	1.05934	1.03615	0.994241	1.04061	1.00903	0.887512	0.890207	1.02019	0.87506	1.25579	1.04854	1.02743	0.881498	0.874097	0.923312	1.04075	0.992091	1.07361	1.13418	1.08961	1.0761	0.996733	1.0631	0.896524	1.02375	1.10233	1.02721	1.01585	0.97268	1.01606	1.01324	1.17976	1.28065	0.985823	1.05625	1.02231	1.02943
-3	0.923906	1.15139	1.01467	0.980567	1.04231	1.00024	1.01607	0.984122	1.03614	1.02074	1.06253	1.0878	1.03241	1.10499	1.15372	1.05675	1.00083	0.850729	0.798921	1.02393	0.972045	1.05306	1.02035	1.02713	0.882065	0.87277	1.19261	1.03941	1.06221	1.1591	1.17126	1.18393	1.11536	0.969921	1.15588	1.03462	1.03319	1.06019	1.01827	1.04868	1.04283	1.07593	1.04307	1.03859	1.15459	0.962787	1.08153	1.02252	1.04164
-2	1.04589	1.15003	1.04085	0.929618	1.02672	1.01414	1.03	1.04978	1.04124	1.0295	1.06917	1.05135	1.02811	1.25048	1.07583	1.06082	1.08209	0.848862	0.756753	0.979144	0.936326	0.917893	0.926664	0.99997	0.907796	0.917409	1.01184	0.993601	1.00999	1.10139	1.12624	1.20234	1.01225	1.02485	1.04534	0.937919	1.03749	0.955318	1.01689	1.01215	0.935309	1.01329	1.06735	0.980312	1.06975	0.976803	1.10743	1.03051	1.07564
-1	0.834018	1.16119	0.994425	0.888756	1.02878	1.07239	1.04881	1.07491	1.06573	1.04127	1.05822	1.09911	1.03032	1.45989	1.13649	1.13576	1.10667	0.80271	0.93548	0.966336	1.01133	0.914199	0.934901	0.950904	0.89659	0.892778	0.929222	1.0098	1.00048	1.06801	1.06775	1.13305	1.02549	1.05672	1.00849	1.02847	1.05391	1.00213	0.983691	1.00103	0.904976	1.0061	1.1018	1.04816	1.15324	0.963291	1.10788	0.994762	1.01381
0	0.875217	0.96756	0.940025	0.862178	1.0065	1.04679	1.00615	0.99627	1.03523	1.0128	1.09033	1.13671	1.04398	1.20672	1.1834	1.01904	1.02464	0.827839	0.920556	0.976449	0.907152	1.05051	1.12677	1.27479	0.895707	0.893359	0.899616	0.982282	1.0611	1.11161	1.14725	1.26939	1.05039	0.992426	1.08339	1.1506	1.02463	1.14993	1.00083	1.18518	1.15356	0.972143	0.803218	1.00329	1.06689	0.985197	1.06909	1.02533	1.03656
1	0.872841	1.19605	1.13797	0.937512	1.03953	1.14238	1.19362	1.10784	1.07115	1.0649	1.11643	1.03636	1.08036	1.18297	1.04725	1.08159	1.08267	1.11954	1.04819	1.04053	0.996161	1.07608	1.1326	1.17329	0.89142	0.888366	1.07091	1.14702	1.08061	1.0906	1.11579	1.21385	1.06975	0.997463	1.08297	1.07923	1.00092	1.05322	0.99187	1.07385	1.05266	1.13086	1.33311	0.975128	1.06699	1.02853	1.08274	1.00323	1.01884
2	0.902509	1.16119	0.993076	0.932092	1.04	1.10455	1.15553	1.07887	1.02601	1.03601	1.06453	0.838976	1.03629	1.11467	0.868979	1.05511	1.10472	1.06948	0.784291	1.0786	0.873961	1.19783	1.12973	1.28188	0.893919	0.883291	1.03024	1.0759	0.977583	1.10727	1.07176	1.19639	1.09641	0.987098	1.09256	1.01549	0.988997	1.1183	0.965883	1.06436	0.95081	1.09646	1.3136	0.984456	1.08384	1.02914	1.03206	1.01339	1.00989
3	0.968513	1.18531	1.09243	0.939924	1.04128	1.08794	1.10982	1.07444	0.990586	1.00954	1.06357	0.898779	1.04404	1.01194	1.04741	1.06495	1.05219	0.973151	0.728008	1.06796	0.898718	1.29183	1.16285	1.15674	0.893812	0.897478	0.926691	1.01809	1.02328	1.08711	1.0968	1.17565	1.01887	0.96098	0.952756	0.954725	0.980379	0.954077	0.952077	1.05087	0.943844	1.00007	1.25947	0.951963	0.996876	1.02769	1.04639	1.00409	1.02468
4	0.933033	1.18048	0.985783	0.947991	1.02997	1.07965	1.12049	1.07103	0.980036	1.00268	1.03481	1.05582	1.04683	1.07661	0.978014	1.07083	1.0465	0.97413	1.03316	1.08993	0.929576	1.10959	1.15091	1.09393	0.894595	0.896984	0.85964	1.01332	1.00587	1.0623	1.10167	1.14603	0.988169	0.978973	0.967017	1.03008	0.995092	1.00137	0.965681	1.1316	0.942782	1.01178	1.28124	0.999319	1.12296	1.01588	1.01499	0.997651	1.0297
5	0.882312	1.15955	1.0083	0.937729	1.01503	1.066	1.08738	1.03996	0.992043	0.992894	1.00909	0.930229	1.01572	1.21269	1.07249	1.04984	1.05992	0.896354	1.01045	1.10619	0.932241	1.15598	1.1677	1.17835	0.850217	0.853809	0.853083	1.01355	0.986411	1.05444	1.06975	1.05944	0.99804	0.989068	0.991797	0.979817	1.01093	1.03014	0.978155	1.06801	0.895507	1.00472	1.26332	0.962503	1.04528	1.00019	1.03318	1.00083	1.0276
6	0.975472	1.13638	0.995235	0.912703	1.02941	1.09452	1.15364	1.07962	1.00908	1.02666	1.049	0.973631	1.0396	1.08901	1.095	1.03591	0.984115	0.87988	0.839668	1.05594	0.900595	1.18847	1.10981	1.19604	0.932427	0.923323	0.881677	1.02146	0.948989	1.07221	1.06434	1.07817	0.969547	0.990088	0.970637	1.0055	1.02515	0.980585	0.976044	0.948997	0.902209	1.04339	1.25015	1.00475	1.12027	1.00143	1.03687	0.996207	1.02385
7	0.796033	1.14579	0.977322	0.9012	0.993469	0.955796	1.00996	0.944585	0.959601	0.976276	1.06459	0.973393	1.02823	0.98102	0.979519	1.04546	1.08132	0.884978	0.988807	1.0352	1.04191	1.32434	1.06405	1.16881	0.849972	0.829341	0.837219	0.965757	1.00335	1.0275	1.07104	1.11155	0.954348	1.07992	0.919304	1.07718	1.0298	1.00029	0.956921	0.893873	0.841704	1.00147	1.1632	0.922392	0.983596	1.03077	1.0123	0.995193	1.01691
8	0.888487	1.11901	0.93209	0.896471	0.982715	0.995922	1.04941	0.982612	0.969789	0.992664	1.06278	0.811168	1.00922	0.997521	0.947406	1.0592	0.993322	0.880504	0.944143	1.05201	1.02938	1.07643	1.07025	1.13352	0.829136	0.82301	0.825452	0.978765	0.971323	1.03513	1.01674	1.03394	0.966046	1.09142	0.937235	1.11905	1.00185	1.02035	0.955351	0.890057	0.844429	1.03222	1.1772	0.956086	1.06343	1.00478	1.00968	0.983753	1.0089
9	0.983026	1.17459	0.909964	0.867701	0.967595	0.974267	1.05333	0.973086	0.972594	0.99398	1.02713	0.865154	0.990179	0.907982	0.983453	1.03759	1.07678	0.884717	0.834571	0.987283	0.920602	1.0049	0.987888	1.03459	0.83139	0.830292	0.779655	0.964713	0.966942	1.09918	1.06254	1.01574	0.971121	1.07824	0.935865	1.13074	0.971346	1.00074	0.926438	0.898833	0.80627	0.986709	1.06176	0.95044	1.01017	1.01021	1.03103	0.992731	1.0248
10	0.863188	1.12637	0.976673	0.85644	0.97347	0.992928	1.03674	0.985961	0.985191	1.00934	1.00522	0.867109	1.00168	0.893693	0.976181	1.04761	1.02109	0.873159	1.04987	0.96316	0.950858	0.99872	0.989452	1.0545	0.832485	0.830499	0.82261	0.988501	0.910069	1.08319	1.04085	0.964634	0.932981	1.03831	0.883476	1.1135	0.957764	1.01947	0.952705	0.939752	0.844148	0.989216	1.11625	0.935803	1.02544	0.996546	1.02428	0.99688	1.04046
[truncated: 38 more columns]

## Sheet: Fig 4e
Figure 4e
	LC axon time binned F
time (s)	1	2	3	4	5	6	7	8	9	10	11	12	13	14	15	16	17	18	19	20	21	22	23	24	25	26	27	28	29	30	31	32	33	34	35	36	37	38	39	40	41	42	43	44	45	46	47	48	49
-101.582	1.1036	1.0265	1.02771	1.08973	NaN	NaN	NaN	NaN	NaN	NaN	NaN	1.32971	0.985051	0.920014	0.730187	0.912107	0.963427	0.867539	0.90257	0.9623	0.960748	0.803465	0.837482	0.804551	1.0137	1.01346	1.23937	1.04887	0.997508	1.06645	1.13807	1.13915	1.46996	0.956711	1.80976	0.974865	1.34385	0.989904	1.12727	0.946186	0.913444	1.0693	0.93803	1.13235	1.03243	0.947013	0.993186	0.969783	0.975771
-91.898	0.970716	1.04447	0.997473	1.10074	NaN	NaN	NaN	NaN	NaN	NaN	NaN	1.25334	0.994625	0.971873	1.07823	0.950858	0.945385	0.865408	0.870137	0.921134	0.917372	0.830738	0.889344	0.854283	1.03595	1.05363	1.08619	0.994184	0.977117	1.05364	1.16114	1.17127	1.25456	0.94458	1.49071	0.947772	1.28218	0.938329	1.12663	1.02526	1.01183	1.03321	0.781916	1.15826	1.07577	0.960045	1.01765	0.984742	0.99716
-82.2143	1.02277	1.03854	1.06989	1.04604	NaN	NaN	NaN	NaN	NaN	NaN	NaN	1.20556	1.01539	1.0259	0.921862	0.982135	1.01832	0.890171	0.891668	0.92535	0.986236	0.811769	0.932647	0.942289	1.01592	1.02267	1.06213	1.03126	1.01165	1.08149	1.17456	1.17795	1.25827	0.967178	1.35406	0.99645	1.23244	0.923738	1.10464	0.989325	0.950111	0.993681	0.828259	1.31325	1.24714	0.970004	1.01151	1.00457	1.01722
-72.5307	1.02024	1.08205	1.00594	1.06828	NaN	NaN	NaN	NaN	NaN	NaN	NaN	1.07516	1.02608	1.13962	1.01589	1.01667	1.04247	0.962758	1.02463	0.990682	1.02725	0.842682	0.934597	0.798325	1.02107	1.02657	1.12361	0.994112	0.983265	1.08087	1.12048	1.16012	1.30326	0.9448	1.45151	0.899154	1.19775	0.956205	1.1004	1.01914	1.0027	0.942871	0.943927	1.19257	1.15628	0.982544	1.03629	0.999404	1.01371
-62.847	1.06408	1.03115	1.01962	1.03913	1.04287	0.965481	0.964762	0.994791	1.00707	1.00024	0.977556	1.12845	1.00568	1.08367	1.02497	1.00755	1.04922	0.898679	0.966877	1.01668	0.898577	0.837751	0.941748	0.902496	1.04859	1.04248	1.10431	1.00829	1.03831	1.09514	1.14552	1.17985	1.28627	0.939388	1.42078	0.912377	1.12069	0.949342	1.0818	1.07615	1.06489	1.00822	0.895956	1.21755	1.1797	1.00132	1.03519	1.00284	0.989534
-53.1633	1.0754	0.992459	1.00931	1.07516	1.0605	1.01699	0.997322	1.05053	1.07735	1.01497	1.03102	1.26911	0.994379	0.98023	0.972379	0.981516	0.962691	1.04291	0.917303	1.09903	1.01052	1.13309	1.04667	1.03329	1.05726	1.04699	1.09508	1.01511	1.00707	1.0356	1.11075	1.10726	1.25005	0.957869	1.29366	0.912679	1.12016	0.955444	1.06333	1.00989	1.03633	0.942164	0.858181	1.0685	1.07578	0.979629	1.02948	1.01944	1.01885
-43.4797	0.96787	1.10536	1.08763	1.00418	1.0243	1.00065	0.905094	1.02036	1.05695	1.0203	0.995635	1.12434	1.00079	0.84937	0.946285	1.00035	1.02135	0.941441	0.91303	1.03332	1.01165	1.20684	0.98298	1.02481	0.974014	0.961376	1.0713	0.981432	0.97085	1.08591	1.16317	1.11083	1.16427	0.953637	1.21566	0.908662	1.07654	0.950725	1.08653	0.962817	0.947275	0.947207	0.966202	1.10472	1.09159	0.986994	1.00743	1.00166	0.994149
-33.796	1.00198	1.09013	1.07925	0.968894	1.03891	0.957433	0.928863	0.96256	1.04757	1.01097	0.999755	1.19858	1.00492	0.846962	1.03164	0.999477	1.01147	0.938436	0.800527	1.03669	1.00989	1.13683	0.990907	0.962006	0.98888	0.983079	0.934311	0.967899	1.01499	1.08758	1.15637	1.16496	1.09059	0.973271	1.11342	0.887965	1.13743	0.956661	1.0442	0.968526	0.877545	0.943334	0.808477	1.19668	1.2102	0.973435	1.05521	1.00946	1.01786
-24.1123	0.972723	1.0854	1.0433	0.957461	1.01492	0.972065	0.946746	0.973223	1.03513	1.00057	1.01184	1.09503	1.02968	1.00191	0.93812	1.02229	1.01356	0.892017	1.0262	1.01323	1.04639	0.912002	0.955158	0.972704	1.01093	1.00111	1.06196	0.964347	1.04138	1.15543	1.1868	1.18598	1.07854	0.941634	1.10786	0.928167	1.05801	1.02942	1.04102	1.0558	0.994854	0.97809	0.957458	1.08548	1.09715	0.979522	1.03025	1.01631	1.02036
-14.4287	1.09001	1.01332	1.0626	0.982969	1.02226	1.00778	0.972332	1.04933	1.04664	1.03204	1.03007	1.03455	1.00403	1.14102	1.11079	1.02591	1.03988	0.916718	1.0442	0.999734	1.07798	0.847887	0.892893	0.983432	1.01787	1.03692	0.986551	0.973863	1.00671	1.09404	1.16465	1.26702	1.11106	0.94682	1.16567	0.997057	1.03958	1.01741	1.01611	0.980633	0.933879	0.926344	0.973975	1.06444	1.13848	0.966898	1.02918	1.00688	1.00565
-4.745	0.94416	1.04891	1.00485	0.925815	0.996533	1.01772	0.955102	1.00232	1.03748	1.01388	0.99455	1.13495	1.014	1.26113	1.11458	1.05795	1.06725	0.91322	0.980224	1.02074	0.926365	0.83778	0.891863	0.918971	1.01236	1.01125	0.923016	0.948507	0.960935	1.04268	1.05753	1.12182	1.02552	0.999933	1.04919	1.00477	1.05301	0.957466	0.99176	1.01628	0.932015	0.954215	0.942611	1.01603	1.09313	0.963034	1.06655	0.99411	1.02127
4.93867	0.998678	1.10008	1.15384	1.00533	1.01831	1.1077	1.10973	1.07506	1.08312	1.05867	1.05062	1.0463	1.05146	1.08609	1.06025	1.04938	1.07918	1.30959	1.60969	1.07696	1.139	1.00302	1.07504	1.19982	0.958185	0.959645	1.04754	1.10172	1.06684	1.12059	1.18486	1.26796	1.05462	0.958284	1.10472	1.16508	1.03234	1.10694	0.995651	1.29239	1.34488	1.15168	1.12675	1.01646	1.03621	0.969347	1.04476	1.02351	1.01245
14.6223	0.895486	1.06358	1.11471	1.00481	1.01986	1.09987	1.10744	1.07848	1.06336	1.05452	1.0603	0.819382	1.02262	1.01379	0.840995	1.03501	1.04993	1.23269	0.995833	1.10467	0.98357	0.923303	1.07382	1.29139	1.06018	1.05785	0.906751	1.10254	1.0274	1.07541	1.13532	1.30444	1.10267	0.951245	1.14968	1.09545	1.01298	1.07881	0.994716	1.21493	1.20009	1.13764	1.10796	0.979156	1.03868	0.997593	1.01971	1.00149	1.01043
24.306	1.04677	1.07682	1.0576	0.995106	1.03242	1.08176	1.09714	1.0668	1.04545	1.03959	1.06149	0.998854	1.02564	0.979945	0.983883	1.02049	1.03288	1.19636	0.956376	1.06383	1.06227	0.936946	0.997942	1.10402	1.01797	1.02245	0.852768	1.03846	1.04417	1.06972	1.11104	1.22011	1.04542	0.925607	1.01657	0.985409	0.997653	0.995722	0.945626	1.17632	1.11966	0.979787	1.16409	0.969887	1.0356	1.02854	1.02229	0.981453	0.992548
33.9897	1.05806	1.05166	1.09413	0.997031	1.02723	1.0617	1.07062	1.04058	1.00973	1.02299	1.01915	0.921399	1.00224	1.07166	1.0738	1.01633	1.02251	1.18187	0.839986	1.06372	0.999474	1.01204	1.14677	1.13525	0.997165	0.992785	0.85567	0.998573	0.979176	1.0907	1.09512	1.21161	1.00108	0.952319	1.01058	1.01631	0.994667	0.984567	0.972188	0.986719	0.973361	1.01188	1.09711	0.979061	1.05633	1.02692	0.991296	0.998566	0.985866
43.6733	0.977831	1.06007	1.0054	1.02257	1.0201	1.04701	1.08714	1.04897	1.019	1.023	1.00777	1.00033	1.00169	0.915089	0.944519	1.02057	1.01931	1.19689	0.810366	1.17672	0.926494	1.06987	1.06443	1.23554	1.03847	1.0326	0.802249	0.969924	0.975511	1.04655	1.1003	1.15906	0.987538	0.967849	0.99316	1.0188	1.04387	0.971704	0.963791	1.16882	1.10368	0.978792	1.10434	0.954267	0.978408	1.02636	1.00218	0.991574	1.00394
53.357	1.01573	1.02015	1.00819	1.01499	1.02157	1.04307	1.03047	1.03513	0.983278	1.00371	0.978754	0.826386	0.980169	0.84127	0.947151	1.01713	1.04606	1.09034	0.895708	1.11409	0.956979	1.19719	1.08225	1.24149	0.978351	0.975184	0.811309	0.970216	0.96004	1.05388	1.08158	1.06515	0.970483	1.03621	0.966269	1.12358	1.02531	0.974957	0.96533	1.12843	1.0693	0.987472	1.1278	0.97066	1.04054	1.01134	0.975663	0.981778	0.998439
63.0407	0.909157	1.0756	1.01078	1.01856	1.02286	1.06697	1.02148	1.04839	1.014	0.996035	0.99621	0.88166	0.973503	0.990501	0.97393	1.00679	0.987057	1.06787	0.864839	1.10597	0.929329	1.17766	1.12826	1.06522	1.01404	1.01758	0.808823	0.976549	0.986072	1.02334	1.07154	1.10748	0.974092	1.04221	0.951117	1.07681	0.9851	0.988603	0.929541	1.00675	1.02002	1.14144	1.09202	1.01367	1.11391	1.0088	0.993941	0.98582	1.00588
72.7243	1.0799	1.03354	0.918084	1.00293	1.02491	1.04004	1.02349	1.04821	0.979738	1.00179	1.03686	0.80317	0.988609	0.990917	1.02807	0.998727	1.02668	1.09045	1.15345	1.13473	1.00423	0.973586	1.04385	1.07533	1.02421	1.03065	0.77953	0.940868	0.920811	1.05553	1.05267	1.02071	0.960532	1.00765	0.93942	1.17757	0.96959	0.987949	0.944905	1.05011	1.08865	1.00811	1.06763	0.992906	1.0852	1.01001	1.00022	0.986288	1.00477
82.408	0.930103	1.00588	0.98062	0.987083	1.01583	1.02675	1.01526	1.04764	0.95985	0.986051	0.973198	0.920495	0.989885	0.897369	0.869121	0.999838	0.997908	1.00534	1.14569	1.17005	0.97642	1.0381	1.13907	1.01129	0.974233	0.987199	0.766126	0.936067	0.948221	1.04306	1.06761	0.96838	0.95639	0.975423	0.918477	1.0701	0.974468	1.02543	0.957055	0.986253	0.965035	0.944529	0.95925	0.943434	1.00723	0.981346	0.981808	0.985511	1.00502
92.0917	0.927087	1.00189	1.02004	0.983675	1.01501	1.04238	1.06572	1.03316	0.982813	0.989878	0.986518	0.897244	0.986416	0.944826	1.04959	1.00678	1.00777	0.997873	1.00868	1.11085	0.919901	0.997726	1.07414	1.13478	0.949357	0.958225	0.715182	0.919876	1.11553	1.03559	1.12767	1.11667	0.966364	0.96633	0.94899	1.15052	0.962126	1.04421	0.949622	1.09909	1.02833	0.930441	1.09851	0.918965	0.948503	1.03109	0.961208	0.974021	0.980162
101.775	0.919757	0.955833	1.00519	0.978183	0.995734	1.02589	1.04615	1.02655	0.964828	0.973575	0.94871	0.99712	0.971746	0.986328	1.01562	0.973407	0.991066	0.963157	0.877675	1.07653	1.01318	1.12391	1.14293	1.13205	0.997995	1.00221	0.704679	0.950294	1.21308	1.06924	1.12818	0.972945	0.973654	0.977052	0.910056	1.04219	0.972708	1.02055	0.94143	0.971977	0.919793	0.957463	1.11545	0.955907	1.04922	1.005	0.969031	0.971119	0.984398
111.459	1.06014	1.02175	1.01431	0.971866	1.01337	1.02217	0.99527	1.00588	0.987575	0.984016	0.935825	0.965914	0.973341	1.06827	0.990012	0.979342	0.965406	0.951807	1.11125	1.09075	1.10741	1.11346	1.09526	1.13899	1.04253	1.04413	0.704813	0.950672	1.23178	1.00204	1.1122	1.10035	0.9575	1.04068	0.905276	0.993816	0.979494	1.00499	0.928214	1.11114	0.916996	0.983139	1.08386	0.945507	0.989496	1.00331	0.999749	0.979946	1.01267
121.143	0.897096	0.955391	0.967872	0.945405	0.989298	1.03368	1.00914	1.0194	1.0076	0.99124	1.00397	0.902681	0.964838	1.04537	1.06862	0.95893	0.970201	1.02158	1.18605	1.09695	1.18649	1.07704	0.978396	1.15703	1.00243	0.989321	0.71042	0.945241	1.1749	1.00922	1.0852	1.01637	0.945978	0.996481	0.911922	0.947009	0.969761	0.979449	0.939159	1.19558	0.975953	0.936338	1.06867	0.940115	1.02704	1.01213	0.993634	0.980091	1.00136
130.826	1.01159	0.981584	0.97904	0.974015	1.01362	1.05979	1.07059	1.03814	1.01093	1.01605	0.987812	0.882854	0.995534	1.09282	1.06553	0.999352	0.95574	0.950896	0.894963	1.08605	1.06564	1.24788	1.03172	1.1156	0.982247	0.952587	0.687161	0.936047	1.139	0.970991	1.09286	1.04632	0.907754	0.957217	0.863284	0.967056	0.943953	0.966352	0.898361	0.921737	0.866143	0.950656	1.12155	0.888003	0.967555	0.991936	1.00188	0.992813	0.999198
140.51	0.930895	0.961161	0.973247	0.945757	1.00342	1.00655	1.0063	1.0041	0.985703	1.003	0.976394	0.941289	0.991699	0.975811	1.05805	0.986226	0.937531	0.973809	0.840766	1.00249	0.942548	0.991089	1.01887	1.08361	0.943998	0.942647	0.70275	0.989835	1.04468	1.00264	1.06191	0.981686	0.894224	0.953524	0.853701	0.969617	0.948424	0.983903	0.924042	0.924892	0.956998	0.909682	1.04265	0.915531	1.00309	0.999546	0.966437	1.01138	1.03766
150.194	0.941217	0.920769	0.977612	0.935397	0.978166	0.913156	0.937101	0.914455	0.956271	0.973672	0.988425	0.906764	1.00454	0.972385	0.97548	0.978952	0.967835	0.983489	1.14699	1.03368	1.02597	0.919552	0.962318	1.0471	0.915427	0.916954	NaN	0.967922	0.96834	1.0472	1.04982	1.05853	0.916364	0.967031	0.864026	1.05383	0.933687	0.998758	0.923454	1.1147	1.00782	0.928905	1.06149	0.90943	0.985993	1.0559	0.987446	1.00847	1.01581
159.877	0.969535	0.961947	0.930178	0.905302	0.981122	0.900848	0.911396	0.899705	0.94477	0.946925	1.02277	1.00731	0.985256	0.883749	0.89349	0.989282	0.949734	0.958714	1.09503	1.02204	1.01255	0.9623	0.947946	1.00023	0.953835	0.951751	NaN	0.991174	1.00751	0.989217	1.06454	0.990863	0.908403	0.974256	0.86876	0.98929	0.935524	1.04169	0.970417	1.16148	0.888356	0.97802	1.09168	0.919239	1.00703	1.02175	0.979239	0.99848	1.01538
169.561	1.01577	0.936593	0.981188	0.933596	0.9747	0.936984	0.971802	0.950954	0.960755	0.965995	1.02805	0.966324	0.989483	0.946363	1.06407	0.954964	0.910203	1.04258	1.01691	0.961218	1.01407	0.925367	0.947126	1.01836	0.936405	0.938899	NaN	0.945087	1.07557	1.01557	1.05869	1.04207	0.912632	0.938507	0.873167	0.964417	0.926423	1.05443	0.925621	1.21004	0.926596	1.04021	1.03305	0.885579	0.940362	0.98994	1.00409	1.01548	0.99481
179.245	0.900297	0.959087	0.943556	0.906152	0.96567	0.92304	0.929269	0.916343	0.924919	0.963256	1.01172	0.972075	1.00415	1.00453	0.940683	0.979969	0.938429	1.01728	1.22751	0.869512	0.933875	0.997853	1.03456	1.02254	0.908477	0.895063	NaN	0.958227	1.00405	1.14304	1.04135	1.01394	0.8902	0.997477	0.86317	0.986596	0.921134	1.00722	0.909143	0.963827	0.86434	0.987368	1.04831	0.867683	0.930122	0.989738	1.02021	1.0172	0.993745
188.928	0.960335	0.98225	0.931935	0.943334	0.976834	0.980071	0.99261	0.961972	0.972173	0.978884	1.0175	0.924473	1.02146	0.987811	1.0407	0.97571	0.930201	1.01851	0.985897	0.857293	0.963945	1.21619	1.05991	1.01107	0.951009	0.959278	NaN	0.960188	1.16682	1.1843	1.08333	1.00091	0.908818	0.977265	0.859698	0.970607	0.938707	1.03858	0.915801	0.964546	0.903345	0.96436	1.08878	0.869865	0.937777	1.02893	0.998943	1.01482	0.99124
[truncated: 38 more columns]
